# Supplementary material for: Dissecting regulatory pathways of G1/S control in Arabidopsis: common and distinct targets of CYCD3;1, E2Fa and E2Fc
Source: Springer Nature journal article supplement (doi:10.1007/s11103-009-9527-5), 2009-08-06
Supplement: MOESM3 [file 11103_2009_9527_MOESM3_ESM.xls]

## Sheet: Table_E2FaDPa_All.xls
probe_ID_25K	locus	P_call_E2Fa_all	P_call_E2Fa_6h	P_call_E2Fa_24h	P_call_E2Fa_14d	robust change call_E2Fa_6h	NC_E2Fa_6h (dupl)	NC_EV (E2Fa)_6h (dupl)	robust change call_E2Fa_24h	NC_E2Fa_24h (dupl)	NC_EV (E2Fa)_24h (dupl)	robust change call_E2Fa_14d	NC_E2Fa_14d (dupl)	NC_EV (E2Fa)_14d (dupl)	Probe ID	EV_6h_3A_Signal	EV_6h_3B_Signal	EV_6h_3_average_Signal	EV_6h_3A_Detection	EV_6h_3B_Detection	EV_6h_3A_Detection p-value	EV_6h_3B_Detection p-value	E2FaDPa_6h_7A_Signal	E2FaDPa_6h_7B_Signal	E2FaDPa_6h_7_average_Signal	E2FaDPa_6h_7A_Detection	E2FaDPa_6h_7B_Detection	E2FaDPa_6h_7A_Detection p-value	E2FaDPa_6h_7B_Detection p-value	C1_7A_v_3A_SLR	C2_7A_v_3B_SLR	C3_7B_v_3A_SLR	C4_7B_v_3B_SLR	average_SLR_6h_E2FaDPa_vs_EV	StDev_SLR_6h_E2FaDPa_vs_EV	C1_7A_v_3A_Change	C2_7A_v_3B_Change	C3_7B_v_3A_Change	C4_7B_v_3B_Change	change call_all_comparison_6h	C13_3B_v_3A_SLR	C14_7B_v_7A_Signal Log Ratio	C13_3B_v_3A_Change	C14_7B_v_7A_Change	EV_24h_11A_Signal	EV_24h_11B_Signal	EV_24h_11_average_Signal	EV_24h_11A_Detection	EV_24h_11B_Detection
261584_at	AT1G01040	11	3	4	4		NC	NC	I	NC	NC	NC	NC	NC	261584_at	345.8	513.2	429.5	A	P	0.080566	0.030273	550	471.4	510.7	P	P	0.018555	0.023926	0.7	0.3	0.3	0.1	0.35	0.251661	I	I	NC	NC	2	0.3	-0.1	NC	NC	334.8	465.6	400.2	P	P
261569_at	AT1G01060	12	4	4	4			NC			NC	D	NC	NC	261569_at	1147.4	1287.1	1217.25	P	P	0.000244	0.000244	3472.8	1004	2238.4	P	P	0.000244	0.000244	1.3	0.8	-0.2	-0.5	0.35	0.842615	I	I	NC	D	2	0.3	-1.4	NC	D	1905.2	1180.1	1542.65	P	P
261577_at	AT1G01080	12	4	4	4	NC	NC	NC	I	NC	NC		NC	NC	261577_at	2979.9	2767.5	2873.7	P	P	0.000244	0.000244	3121.9	2778.6	2950.25	P	P	0.000244	0.000244	0.1	0.2	0	0	0.075	0.0957427	NC	NC	NC	NC	4	0	-0.1	NC	NC	2969.6	2559.9	2764.75	P	P
259431_at	AT1G01620	12	4	4	4	NC	NC	NC		NC		D	NC	NC	259431_at	11358.2	10640.1	10999.1	P	P	0.000244	0.000244	11532.4	11187.1	11359.8	P	P	0.000244	0.000244	-0.1	0.1	0	0.2	0.05	0.129099	NC	NC	NC	NC	4	-0.2	0.1	NC	NC	11384.3	11137.2	11260.8	P	P
261622_at	AT1G01970	12	4	4	4	NC	NC	NC	I	NC	NC	NC	NC	NC	261622_at	1184.4	1431.6	1308	P	P	0.000244	0.000244	1302.7	1097.1	1199.9	P	P	0.000244	0.000244	0.2	0	0.1	-0.1	0.05	0.129099	NC	NC	NC	NC	4	0.3	-0.1	NC	NC	1227.5	1024	1125.75	P	P
264177_at	AT1G02150	12	4	4	4	NC	NC	NC	I	NC	NC		NC	NC	264177_at	3970.1	4104.6	4037.35	P	P	0.000244	0.000244	4937.6	4490.6	4714.1	P	P	0.000244	0.000244	0.2	0.2	0.2	0.1	0.175	0.05	NC	NC	NC	NC	4	0	-0.1	NC	NC	3773.4	3778.2	3775.8	P	P
264146_at	AT1G02205	9	2	3	4	I	NC	NC		NC	NC		NC	NC	264146_at	195.9	228.6	212.25	A	A	0.095215	0.095215	518.4	493.6	506	P	P	0.008057	0.00293	1.4	1.1	1.4	1.2	1.275	0.15	I	I	I	I	4	0.2	0	NC	NC	186.1	266.4	226.25	P	A
264121_at	AT1G02280	12	4	4	4		NC	NC	I	NC	NC	NC	NC	NC	264121_at	3345.6	3231.7	3288.65	P	P	0.000244	0.000244	3932.7	3549.5	3741.1	P	P	0.000244	0.000244	0.2	0.3	0.1	0	0.15	0.129099	I	NC	NC	NC	1	0.1	-0.2	NC	NC	3200.6	2873.6	3037.1	P	P
262109_at	AT1G02730	12	4	4	4		NC	NC	I	NC	NC	D	NC	NC	262109_at	1112.7	1354.1	1233.4	P	P	0.000732	0.000244	1545.9	1297.5	1421.7	P	P	0.000244	0.000244	0.6	0.4	0.4	0.2	0.4	0.163299	I	I	MI	NC	2	0.3	-0.2	NC	NC	866.1	1125.7	995.9	P	P
262119_s_at	AT1G02920;AT1G02930	12	4	4	4	D	NC	NC	D		NC				262119_s_at	16859	15527.9	16193.5	P	P	0.000244	0.000244	11907	11078.5	11492.8	P	P	0.000244	0.000244	-0.5	-0.4	-0.5	-0.4	-0.45	0.057735	D	D	D	D	4	-0.1	0	NC	NC	19981.4	18162.9	19072.2	P	P
263114_at	AT1G03130	12	4	4	4		NC	NC	NC	NC	NC	D	NC	NC	263114_at	12257.7	11980.6	12119.1	P	P	0.000244	0.000244	15656.2	13309.9	14483	P	P	0.000244	0.000244	0.3	0.4	0.1	0.1	0.225	0.15	I	I	NC	NC	2	0	-0.2	NC	NC	14074.2	12774.2	13424.2	P	P
264357_at	AT1G03360	12	4	4	4		NC	NC	I	NC	NC	NC	NC	NC	264357_at	471.2	581.5	526.35	P	P	0.005859	0.008057	695.2	608.8	652	P	P	0.00415	0.00415	0.6	0.4	0.4	0.3	0.425	0.125831	I	NC	I	NC	2	0.3	-0.3	NC	NC	571.1	563.3	567.2	P	P
264839_at	AT1G03630	12	4	4	4		NC	NC	I	NC	NC	NC	NC	NC	264839_at	3526.1	3981.8	3753.95	P	P	0.000244	0.000244	5282.4	5086.2	5184.3	P	P	0.000244	0.000244	0.6	0.4	0.5	0.3	0.45	0.129099	I	I	I	NC	3	0.1	-0.1	NC	NC	3976.4	3550.9	3763.65	P	P
265067_at	AT1G03850	12	4	4	4	NC	NC	NC			NC	I	NC	NC	265067_at	1455.8	1368.3	1412.05	P	P	0.000244	0.000244	1176.5	1302.7	1239.6	P	P	0.000732	0.000244	-0.3	-0.1	0	-0.1	-0.125	0.125831	NC	NC	NC	NC	4	0.1	0.2	NC	NC	1482.8	1251.2	1367	P	P
265066_at	AT1G03870	12	4	4	4			NC		NC	NC	D	NC	NC	265066_at	9458.4	7714.8	8586.6	P	P	0.000244	0.000244	5781.4	7835	6808.2	P	P	0.000244	0.000244	-0.7	-0.4	-0.3	-0.1	-0.375	0.25	D	D	NC	NC	2	-0.3	0.4	NC	I	8271.5	8419.6	8345.55	P	P
265091_s_at	AT1G03940	7	2	1	4	I		NC			NC	D	NC	NC	265091_s_at	215.6	321	268.3	A	A	0.171387	0.095215	930	564.5	747.25	P	P	0.030273	0.037598	1.8	1.6	0.8	0.9	1.275	0.499166	I	I	I	I	4	0.1	-1	NC	D	279.8	307.3	293.55	M	A
265097_at	AT1G04020	12	4	4	4	I	NC	NC		NC	NC	NC	NC	NC	265097_at	416.5	551.5	484	P	P	0.023926	0.018555	615	740.2	677.6	P	P	0.00415	0.00293	0.7	0.5	0.7	0.5	0.6	0.11547	I	I	I	I	4	0.2	-0.2	NC	NC	375.8	500.8	438.3	P	P
263661_at	AT1G04290	12	4	4	4		NC	NC	D	NC	NC	NC	NC	NC	263661_at	1820.9	1503	1661.95	P	P	0.000732	0.000732	1027.8	1491	1259.4	P	P	0.000732	0.000732	-0.4	-0.4	-0.3	-0.2	-0.325	0.0957427	D	D	MD	NC	2	-0.2	0.3	NC	NC	2024.1	1578.1	1801.1	P	P
263663_at	AT1G04410	12	4	4	4		NC	NC	D	NC	NC	NC	NC	NC	263663_at	40849.6	36841.1	38845.3	P	P	0.000244	0.000244	30672.4	32179.2	31425.8	P	P	0.000244	0.000244	-0.4	-0.2	-0.3	-0.2	-0.275	0.0957427	D	D	D	NC	3	-0.2	0.1	NC	NC	36819.6	38743.4	37781.5	P	P
263678_at	AT1G04420	12	4	4	4		NC	NC	I	NC	NC		NC	NC	263678_at	2559.5	2968.4	2763.95	P	P	0.001221	0.000732	3450.9	3195.1	3323	P	P	0.000732	0.000732	0.5	0.2	0.3	0	0.25	0.208167	I	NC	I	NC	2	0.3	-0.1	NC	NC	3106.1	2912.7	3009.4	P	P
263677_at	AT1G04520	12	4	4	4		NC	NC	I	NC	NC		NC	NC	263677_at	328.5	412	370.25	P	P	0.023926	0.005859	647.8	497.4	572.6	P	P	0.00293	0.001953	0.7	0.4	0.4	0.3	0.45	0.173205	I	NC	NC	NC	1	0.2	-0.4	NC	NC	389	360	374.5	P	P
264597_at	AT1G04620	12	4	4	4	NC	NC	NC	I	NC	NC	NC	NC	NC	264597_at	895	859.6	877.3	P	P	0.000244	0.000244	972.3	827.8	900.05	P	P	0.000244	0.000244	0.1	0.1	0.1	0	0.075	0.05	NC	NC	NC	NC	4	-0.2	0.1	NC	NC	907.9	850.3	879.1	P	P
261154_at	AT1G04970	12	4	4	4	NC	NC	NC	NC	NC	NC	I	NC	NC	261154_at	1674.9	1694.8	1684.85	P	P	0.000244	0.000244	1717	1649.4	1683.2	P	P	0.000244	0.000244	0	-0.1	0	-0.2	-0.075	0.0957427	NC	NC	NC	NC	4	0.2	0	NC	NC	1608.1	1770.3	1689.2	P	P
261125_at	AT1G04990	12	4	4	4			NC	D	NC	NC		NC	NC	261125_at	831.5	826.3	828.9	P	P	0.000244	0.000244	580.3	632.1	606.2	P	P	0.001221	0.000244	-0.5	-0.6	-0.2	-0.4	-0.425	0.170783	D	D	NC	NC	2	0	0.2	NC	I	858	971.1	914.55	P	P
264587_at	AT1G05200	8	2	2	4	NC	NC	NC	I	NC	NC	NC	NC	NC	264587_at	289.7	321.9	305.8	A	P	0.095215	0.046143	502.5	290	396.25	A	P	0.067627	0.046143	0.7	0.3	-0.2	-0.1	0.175	0.411299	NC	NC	NC	NC	4	0.3	-0.5	NC	NC	339.1	309.5	324.3	A	A
264567_s_at	AT1G05250;AT1G05240	12	4	4	4	D		NC	D	NC	NC	I	NC	NC	264567_s_at	3145.7	3269.1	3207.4	P	P	0.000244	0.000244	1207.3	2473.2	1840.25	P	P	0.000244	0.000244	-1.4	-1.2	-0.6	-0.4	-0.9	0.476095	D	D	D	D	4	-0.3	0.7	NC	I	3126.1	2633.4	2879.75	P	P
264580_at	AT1G05340	7	3	2	2	NC	NC	NC		NC		I	NC	NC	264580_at	157.4	140.7	149.05	P	A	0.00415	0.095215	294.4	244.9	269.65	P	P	0.030273	0.010742	0.4	1	0	0.4	0.45	0.412311	NC	NC	NC	NC	4	-0.2	-0.4	NC	NC	269.6	164.4	217	P	A
263180_at	AT1G05620	12	4	4	4	NC	NC	NC		NC	NC	I	NC	NC	263180_at	1887.2	2048.1	1967.65	P	P	0.000244	0.000244	2031.7	2096.3	2064	P	P	0.000244	0.000244	0	-0.2	0.1	-0.1	-0.05	0.129099	NC	NC	NC	NC	4	0.1	0.1	NC	NC	2287.2	2379.9	2333.55	P	P
260961_at	AT1G05960	12	4	4	4		NC	NC	I	NC	NC	NC	NC	NC	260961_at	467.7	543.5	505.6	P	P	0.000244	0.000244	706.5	655.5	681	P	P	0.000244	0.000244	0.6	0.2	0.4	0.2	0.35	0.191485	I	I	NC	NC	2	0.3	-0.3	NC	NC	474.1	444.7	459.4	P	P
260948_at	AT1G06100;AT1G06120	11	4	3	4		NC	NC		NC	NC	D	NC	NC	260948_at	160.9	287.3	224.1	P	P	0.037598	0.010742	541.7	313.6	427.65	P	P	0.001953	0.001953	0.9	0.6	0.4	0	0.475	0.377492	I	I	I	NC	3	0.3	-0.5	NC	NC	159.9	148.3	154.1	P	A
260793_at	AT1G06190	12	4	4	4		NC	NC	I	NC	NC	NC	NC	NC	260793_at	1527.5	1761.7	1644.6	P	P	0.000244	0.000244	1918.2	1826.2	1872.2	P	P	0.000244	0.000244	0.5	0.2	0.4	0.1	0.3	0.182574	I	NC	I	NC	2	0.3	0	NC	NC	1547.5	1715	1631.25	P	P
259391_s_at	AT1G06350	12	4	4	4	I	NC	NC	I	NC	NC	D	NC	NC	259391_s_at	652.2	551	601.6	P	P	0.000732	0.000244	1155.1	983.8	1069.45	P	P	0.000244	0.000244	1	1.1	0.7	0.8	0.9	0.182574	I	I	I	I	4	0.2	-0.2	NC	NC	577.4	744.5	660.95	P	P
262636_at	AT1G06670	12	4	4	4			NC	I	NC	NC	NC	NC	NC	262636_at	973.6	1077.4	1025.5	P	P	0.000244	0.000244	1408.1	1050.5	1229.3	P	P	0.000244	0.000244	0.5	0.2	0.1	-0.2	0.15	0.288675	I	NC	NC	NC	1	0.2	-0.3	NC	D	858.6	1062.4	960.5	P	P
262634_at	AT1G06690	12	4	4	4	NC	NC	NC	NC	NC	NC	D	NC	NC	262634_at	787.7	741.2	764.45	P	P	0.000244	0.001221	836.9	796.8	816.85	P	P	0.000244	0.000732	0	0.4	-0.2	0.1	0.075	0.25	NC	NC	NC	NC	4	-0.2	-0.3	NC	NC	796	934.1	865.05	P	P
260824_at	AT1G06720	12	4	4	4		NC	NC	I	NC	NC	NC	NC	NC	260824_at	376.1	376.7	376.4	P	P	0.000244	0.000244	595.7	450.1	522.9	P	P	0.000244	0.000244	0.6	0.4	0.5	0.1	0.4	0.216025	I	NC	NC	NC	1	0.4	-0.3	NC	NC	270.1	352.1	311.1	P	P
260815_at	AT1G06950	12	4	4	4		NC	NC	I	NC	NC		NC	NC	260815_at	2920.1	3024.5	2972.3	P	P	0.000244	0.000244	3462.6	3371.5	3417.05	P	P	0.000244	0.000244	0.3	0.2	0.2	0.1	0.2	0.0816497	I	NC	NC	NC	1	0.1	-0.1	NC	NC	2680.6	3110.1	2895.35	P	P
256050_at	AT1G07000	12	4	4	4		NC	NC		NC	NC	I	NC	NC	256050_at	928.1	691.4	809.75	P	P	0.00293	0.010742	799.2	874	836.6	P	P	0.005859	0.00293	-0.1	0.3	0	0.4	0.15	0.238048	NC	NC	NC	MI	3	-0.4	0.1	NC	NC	882.4	823.1	852.75	P	P
256049_at	AT1G07010	12	4	4	4			NC	I	NC	NC	NC	NC	NC	256049_at	1904.8	2760.9	2332.85	P	P	0.000244	0.000244	3304.7	2210.2	2757.45	P	P	0.000244	0.000244	0.3	0.3	0.1	-0.2	0.125	0.236291	I	MI	NC	NC	1	0.1	-0.4	NC	D	1949.4	2320.6	2135	P	P
256036_at	AT1G07110	12	4	4	4	NC	NC	NC	I	NC	NC		NC	NC	256036_at	2558.2	2816.3	2687.25	P	P	0.000244	0.000244	2674.2	2583.9	2629.05	P	P	0.000244	0.000244	0.1	0.1	-0.1	-0.1	0	0.11547	NC	NC	NC	NC	4	0.1	-0.1	NC	NC	2456	2611.4	2533.7	P	P
261081_at	AT1G07350	12	4	4	4		NC	NC			NC	I	NC	NC	261081_at	2965.9	3202.8	3084.35	P	P	0.000732	0.000732	3374.6	3842.4	3608.5	P	P	0.000244	0.000732	0	0	0.2	0.2	0.1	0.11547	NC	NC	I	I	2	0	0.2	NC	NC	2819.3	3442.3	3130.8	P	P
261080_at	AT1G07370	12	4	4	4	I	NC	NC		NC	NC		NC	NC	261080_at	1668.2	1793.5	1730.85	P	P	0.000244	0.000244	2812.7	2640.6	2726.65	P	P	0.000244	0.000244	0.6	0.6	0.4	0.6	0.55	0.1	I	I	I	I	4	0	0	NC	NC	1692.6	1906.9	1799.75	P	P
261070_at	AT1G07390	12	4	4	4	D	NC	NC		NC	NC		NC	NC	261070_at	975.5	957.9	966.7	P	P	0.000732	0.000732	619.8	638	628.9	P	P	0.000732	0.001221	-0.5	-0.5	-0.7	-0.5	-0.55	0.1	D	D	D	D	4	0	-0.1	NC	NC	788.3	1046.3	917.3	P	P
261415_at	AT1G07750	12	4	4	4		NC	NC	D	NC	NC	NC	NC	NC	261415_at	3376.1	2654.7	3015.4	P	P	0.000244	0.000244	1901.4	2177.9	2039.65	P	P	0.000244	0.000244	-0.7	-0.5	-0.5	-0.3	-0.5	0.163299	D	D	D	MD	3	-0.2	0.2	NC	NC	2792.5	3232.2	3012.35	P	P
261419_at	AT1G07840	11	4	3	4	NC	NC	NC	I	NC	NC	NC	NC	NC	261419_at	593.8	615.2	604.5	P	P	0.018555	0.01416	841	852.8	846.9	P	P	0.010742	0.005859	0.3	0.2	0.3	0.1	0.225	0.0957427	NC	NC	NC	NC	4	0.2	0	NC	NC	530.5	670.6	600.55	P	M
261412_at	AT1G07890	12	4	4	4	D	NC	NC		NC	NC	NC	NC	NC	261412_at	38842.8	36474.1	37658.4	P	P	0.000244	0.000244	28048.7	29286.6	28667.7	P	P	0.000244	0.000244	-0.5	-0.4	-0.4	-0.3	-0.4	0.0816497	D	D	D	D	4	0	0.1	NC	NC	34747.6	38131	36439.3	P	P
260623_at	AT1G08090	3	1	0	2	NC	NC	NC	NC	NC	NC	D	NC	NC	260623_at	244.5	278.6	261.55	A	A	0.303711	0.149658	252.7	183.4	218.05	P	A	0.046143	0.129639	0.2	0.2	-0.4	-0.5	-0.125	0.377492	NC	NC	NC	NC	4	-0.1	-0.3	NC	NC	188.6	251.5	220.05	A	A
261746_at	AT1G08380	12	4	4	4	NC	NC	NC	NC	NC	NC	D	NC	NC	261746_at	34220.1	32946.5	33583.3	P	P	0.000244	0.000244	36119.4	35966.6	36043	P	P	0.000244	0.000244	0	0.1	0	0.1	0.05	0.057735	NC	NC	NC	NC	4	-0.1	0	NC	NC	34118.3	36474	35296.2	P	P
261721_at	AT1G08480	12	4	4	4			NC	D	NC	NC	NC	NC	NC	261721_at	5497.2	5448.1	5472.65	P	P	0.000244	0.000244	4146.7	5636.2	4891.45	P	P	0.000244	0.000244	-0.4	-0.3	-0.1	-0.1	-0.225	0.15	D	D	NC	NC	2	0	0.3	NC	I	5645.9	5318.2	5482.05	P	P
261695_at	AT1G08520	12	4	4	4		NC	NC	I	NC	NC	D	NC	NC	261695_at	3504.7	3809	3656.85	P	P	0.000244	0.000244	4034.8	4563.2	4299	P	P	0.000244	0.000244	0.3	0.2	0.3	0.2	0.25	0.057735	I	NC	I	NC	2	0.1	-0.1	NC	NC	3559	3828.5	3693.75	P	P
264781_at	AT1G08540	12	4	4	4	NC	NC	NC	I	NC	NC	NC	NC	NC	264781_at	1144.3	1189.3	1166.8	P	P	0.010742	0.01416	1443	1212	1327.5	P	P	0.008057	0.010742	0.3	0.2	0	0	0.125	0.15	NC	NC	NC	NC	4	0	-0.3	NC	NC	1082.2	1277.7	1179.95	P	P
264799_at	AT1G08550	12	4	4	4		NC	NC	I	NC	NC	NC	NC	NC	264799_at	1310.9	1294.5	1302.7	P	P	0.000244	0.000244	1428.3	1574.9	1501.6	P	P	0.000244	0.000244	0.2	0.1	0.2	0.1	0.15	0.057735	NC	NC	I	NC	3	0.1	0.1	NC	NC	1180.5	1425.7	1303.1	P	P
264808_at	AT1G08770	12	4	4	4		NC	NC	D	NC	NC		NC	NC	264808_at	1940.9	1535.1	1738	P	P	0.000732	0.000732	1389.5	1527.7	1458.6	P	P	0.000732	0.000732	-0.4	-0.2	-0.2	0.1	-0.175	0.206155	D	NC	NC	NC	1	-0.3	0.1	NC	NC	1673.7	1778.3	1726	P	P
264652_at	AT1G08920	12	4	4	4			NC		NC	NC	I	NC	NC	264652_at	450.8	555.2	503	P	P	0.000732	0.001221	632.1	464.4	548.25	P	P	0.000244	0.000732	0.5	0.3	0.1	-0.3	0.15	0.341565	I	NC	NC	NC	1	0.4	-0.4	NC	MD	445.5	411.9	428.7	P	P
264655_at	AT1G09070	12	4	4	4	D	NC	NC	D		NC	NC	NC	NC	264655_at	4836.6	4460.2	4648.4	P	P	0.001221	0.001221	3451.2	3487	3469.1	P	P	0.00293	0.001221	-0.7	-0.5	-0.5	-0.4	-0.525	0.125831	D	D	D	D	4	-0.2	0.2	NC	NC	4382.1	5353.8	4867.95	P	P
264647_at	AT1G09090	12	4	4	4			NC		NC	NC	I	NC	NC	264647_at	590	544.8	567.4	P	P	0.00415	0.00293	555.5	662.5	609	P	P	0.00293	0.000732	-0.1	0.1	0.2	0.3	0.125	0.170783	NC	NC	MI	I	2	-0.1	0.2	NC	I	467.1	559.8	513.45	P	P
264255_at	AT1G09140	12	4	4	4	NC	NC	NC	NC	NC	NC	I	NC	NC	264255_at	1824.2	1284.6	1554.4	P	P	0.000732	0.000244	1345	1601.6	1473.3	P	P	0.000732	0.000244	-0.3	-0.2	0	0.2	-0.075	0.221736	NC	NC	NC	NC	4	-0.1	0.3	NC	NC	1241.4	1428.7	1335.05	P	P
264261_at	AT1G09240	12	4	4	4	D	NC	NC	D	NC			NC	NC	264261_at	1593.9	1503.2	1548.55	P	P	0.000244	0.000244	491.6	802.1	646.85	P	P	0.000244	0.000244	-1.8	-1.7	-0.9	-0.9	-1.325	0.492443	D	D	D	D	4	-0.1	0.8	NC	NC	1352.6	1702.2	1527.4	P	P
264513_at	AT1G09420	12	4	4	4	NC	NC	NC	I	NC	NC	NC	NC	NC	264513_at	901.3	995.8	948.55	P	P	0.008057	0.00415	1097.5	1018.2	1057.85	P	P	0.008057	0.00415	0.2	-0.1	0.1	0	0.05	0.129099	NC	NC	NC	NC	4	0.2	0	NC	NC	825.9	873.1	849.5	P	P
264514_at	AT1G09500	9	1	4	4			NC			NC	I	NC	NC	264514_at	119.1	214.6	166.85	A	A	0.19458	0.080566	514.6	200.8	357.7	P	A	0.01416	0.111572	1.8	1.2	0.4	-0.2	0.8	0.879394	I	I	NC	NC	2	0.6	-1.7	NC	D	328.1	328.1	328.1	P	P
264506_at	AT1G09560	12	4	4	4		NC	NC	D	NC	NC	NC	NC	NC	264506_at	7578.8	6208.3	6893.55	P	P	0.000244	0.000244	5289.3	6109.3	5699.3	P	P	0.000244	0.000244	-0.4	-0.3	-0.3	0	-0.25	0.173205	D	D	NC	NC	2	-0.2	0.2	NC	NC	7282.3	6067.3	6674.8	P	P
264678_at	AT1G09760	12	4	4	4	NC	NC	NC	I	NC	NC	NC	NC	NC	264678_at	660.1	806.4	733.25	P	P	0.001953	0.000244	892.1	873.3	882.7	P	P	0.000244	0.000244	0.4	0.2	0.2	0.1	0.225	0.125831	NC	NC	NC	NC	4	0.3	-0.1	NC	NC	778.4	894	836.2	P	P
264709_at	AT1G09770	12	4	4	4	NC	NC	NC	I	NC	NC	NC	NC	NC	264709_at	1093.5	946.8	1020.15	P	P	0.000732	0.001221	1685.3	1104.7	1395	P	P	0.000244	0.000244	0.2	0.4	0.2	0.1	0.225	0.125831	NC	NC	NC	NC	4	0.1	0	NC	NC	1100.3	927.3	1013.8	P	P
264668_at	AT1G09780	12	4	4	4		NC	NC		NC		D	NC	NC	264668_at	9147.5	10198.9	9673.2	P	P	0.000244	0.000244	8249.3	8497.8	8373.55	P	P	0.000244	0.000244	-0.2	-0.3	-0.1	-0.2	-0.2	0.0816497	D	D	NC	NC	2	0.1	0.1	NC	NC	8176.7	9636.7	8906.7	P	P
264689_at	AT1G09900	12	4	4	4		NC	NC	I	NC	NC	NC	NC	NC	264689_at	712.7	923.2	817.95	P	P	0.000244	0.000244	1019.6	920.7	970.15	P	P	0.000244	0.000244	0.5	0.1	0.4	0.2	0.3	0.182574	I	NC	NC	NC	1	0.4	-0.2	NC	NC	674.5	567.9	621.2	P	P
264521_at	AT1G10020	12	4	4	4	NC	NC	NC		NC	NC	D	NC	NC	264521_at	860.8	749	804.9	P	P	0.037598	0.046143	617.2	755.7	686.45	P	P	0.037598	0.037598	-0.2	-0.1	0	0.1	-0.05	0.129099	NC	NC	NC	NC	4	0	0.2	NC	NC	774.6	828.6	801.6	P	P
264467_at	AT1G10140	12	4	4	4	D	NC	NC	D	NC	NC	NC	NC	NC	264467_at	925.4	984.2	954.8	P	P	0.000244	0.000244	476.4	421.1	448.75	P	P	0.000732	0.000244	-1	-1	-1.1	-1	-1.025	0.05	D	D	D	D	4	0	-0.1	NC	NC	806	878.5	842.25	P	P
264407_at	AT1G10180	12	4	4	4	NC	NC	NC	I	NC	NC	NC	NC	NC	264407_at	647.3	659.3	653.3	P	P	0.000244	0.000244	685.4	738.4	711.9	P	P	0.005859	0.000244	0	0.1	0	0.3	0.1	0.141421	NC	NC	NC	NC	4	0	0.2	NC	NC	657.2	639	648.1	P	P
264434_at	AT1G10340	7	2	3	2		NC	NC	D	NC	NC	I	NC	NC	264434_at	504.7	553.4	529.05	P	P	0.010742	0.018555	361.1	439.2	400.15	A	M	0.080566	0.056152	-0.6	-0.4	-0.4	-0.3	-0.425	0.125831	NC	D	NC	NC	3	0	0	NC	NC	567.3	584.1	575.7	P	P
264436_at	AT1G10370	12	4	4	4		NC	NC	D	NC	NC		NC		264436_at	2756.5	3303.5	3030	P	P	0.000244	0.000244	2893.4	2156.7	2525.05	P	P	0.000244	0.000244	-0.2	-0.2	-0.3	-0.5	-0.3	0.141421	NC	NC	D	D	2	0	-0.3	NC	NC	3255.8	3543.5	3399.65	P	P
264458_at	AT1G10410	12	4	4	4	NC	NC	NC	NC		NC	I	NC	NC	264458_at	1234.3	1316.2	1275.25	P	P	0.000732	0.000732	1145.2	1284.1	1214.65	P	P	0.000732	0.000732	-0.1	-0.1	-0.1	-0.1	-0.1	0	NC	NC	NC	NC	4	0	0.1	NC	NC	1419.5	1169.4	1294.45	P	P
263255_at	AT1G10490	12	4	4	4	NC	NC	NC	I	NC	NC	NC	NC	NC	263255_at	773.2	806	789.6	P	P	0.00293	0.000244	868.4	889	878.7	P	P	0.000244	0.000732	0.3	0.2	0	-0.1	0.1	0.182574	NC	NC	NC	NC	4	0.1	-0.3	NC	NC	553.1	735.9	644.5	P	P
263212_at	AT1G10510	12	4	4	4		NC	NC	I	NC	NC		NC	NC	263212_at	800.9	965	882.95	P	P	0.000244	0.000244	1224.3	1227.8	1226.05	P	P	0.000244	0.000244	0.5	0.3	0.3	0.2	0.325	0.125831	I	I	I	NC	3	0.1	-0.2	NC	NC	839.3	826.5	832.9	P	P
261834_at	AT1G10640	12	4	4	4	I	NC	NC			NC		NC	NC	261834_at	601.4	529.1	565.25	P	P	0.01416	0.01416	1078.4	1176.4	1127.4	P	P	0.005859	0.001953	0.7	0.6	0.8	0.7	0.7	0.0816497	I	I	I	I	4	0	0.1	NC	NC	771	586.7	678.85	P	P
260466_at	AT1G10900	12	4	4	4	NC	NC	NC	I	NC	NC		NC	NC	260466_at	366.7	406.3	386.5	P	P	0.00293	0.001221	476.7	457.9	467.3	P	P	0.001953	0.000732	0.4	0.2	0.3	0.1	0.25	0.129099	NC	NC	NC	NC	4	0.2	0	NC	NC	334.6	363.5	349.05	P	P
260465_at	AT1G10910	12	4	4	4				I	NC	NC	NC	NC	NC	260465_at	299.5	500.5	400	P	P	0.008057	0.001953	367.4	477.7	422.55	P	P	0.000732	0.00293	0.8	0.3	0.4	0	0.375	0.330404	I	I	NC	NC	2	0.6	-0.5	I	D	364.8	431.8	398.3	P	P
260477_at	AT1G11050	11	4	3	4	NC	NC	NC	D	NC	NC	NC	NC	NC	260477_at	621.1	865	743.05	P	P	0.008057	0.018555	588.3	573.5	580.9	P	P	0.030273	0.037598	-0.3	-0.3	-0.6	-0.4	-0.4	0.141421	NC	NC	NC	NC	4	0	-0.3	NC	NC	760.3	771.5	765.9	P	P
260475_at	AT1G11080	12	4	4	4		NC			NC	NC	D	NC	NC	260475_at	254.8	354.3	304.55	P	P	0.00415	0.008057	543.1	404.7	473.9	P	P	0.001221	0.001953	1	0.6	0.5	0	0.525	0.411299	I	I	I	NC	3	0.5	-0.3	I	NC	360.3	289.5	324.9	P	P
262458_at	AT1G11280	12	4	4	4		NC	NC	I	NC	NC	NC	NC	NC	262458_at	707.7	736.5	722.1	P	P	0.000244	0.000244	1185.8	887.5	1036.65	P	P	0.000244	0.000244	0.7	0.4	0.6	0.2	0.475	0.221736	I	I	I	NC	3	0.3	-0.3	NC	NC	732.9	559.5	646.2	P	P
262507_at	AT1G11330	12	4	4	4	NC	NC	NC		NC	NC	I	NC	NC	262507_at	471.4	500.5	485.95	P	P	0.001953	0.001953	315.7	546.5	431.1	P	P	0.000732	0.000244	-0.2	0.1	0.1	0.1	0.025	0.15	NC	NC	NC	NC	4	-0.2	0.1	NC	NC	467.9	377.4	422.65	P	P
261873_at	AT1G11350	12	4	4	4		NC	NC	I	NC	NC	NC	NC	NC	261873_at	219.7	192.3	206	P	P	0.018555	0.01416	403.6	334	368.8	P	P	0.008057	0.001953	0.6	0.7	0.7	0.6	0.65	0.057735	I	NC	I	I	3	0	0	NC	NC	287.2	221.9	254.55	P	P
261872_s_at	AT1G11520	12	4	4	4		NC	NC	I	NC	NC	NC	NC	NC	261872_s_at	636.6	813.7	725.15	P	P	0.000244	0.000244	1119.6	1002.9	1061.25	P	P	0.000244	0.000244	0.5	0.4	0.4	0.2	0.375	0.125831	I	I	NC	NC	2	0.2	-0.2	NC	NC	671	508.9	589.95	P	P
261826_at	AT1G11580	12	4	4	4			NC	D	NC	NC		NC	NC	261826_at	9816.2	9825.4	9820.8	P	P	0.000244	0.000244	8274.5	10270.9	9272.7	P	P	0.000244	0.000244	-0.4	-0.2	0	0.1	-0.125	0.221736	D	D	NC	NC	2	-0.1	0.3	NC	I	8888.8	12411.3	10650	P	P
262811_at	AT1G11700	12	4	4	4				D	NC	NC		NC	NC	262811_at	1001.8	620.4	811.1	P	P	0.000244	0.001953	722	898.4	810.2	P	P	0.00415	0.001221	-0.6	-0.1	-0.1	0.3	-0.125	0.368556	D	NC	NC	NC	1	-0.5	0.3	D	MI	753.9	817.1	785.5	P	P
262809_at	AT1G11720	12	4	4	4		NC	NC	I	NC	NC	NC	NC	NC	262809_at	640.7	596	618.35	P	P	0.001953	0.00415	832.6	730.9	781.75	P	P	0.00293	0.001953	0.4	0.4	0.2	0.1	0.275	0.15	I	MI	NC	NC	1	0	-0.3	NC	NC	632.5	631.3	631.9	P	P
264397_at	AT1G11820	12	4	4	4		NC	NC	I	NC	NC	NC	NC	NC	264397_at	1329.5	1244.7	1287.1	P	P	0.000244	0.000244	1744.3	1598.9	1671.6	P	P	0.000244	0.000244	0.7	0.6	0.4	0.3	0.5	0.182574	I	I	MI	I	3	0.1	-0.3	NC	NC	1328.7	1241.8	1285.25	P	P
264343_at	AT1G11850	12	4	4	4		NC	NC			NC	D	NC	NC	264343_at	1979.2	1895.7	1937.45	P	P	0.000244	0.000244	2953.7	2511.5	2732.6	P	P	0.000244	0.000732	0.4	0.4	0.3	0.2	0.325	0.0957427	I	I	I	NC	3	0.1	-0.1	NC	NC	2189.9	1904.1	2047	P	P
264344_at	AT1G11910	12	4	4	4		NC	NC	D	NC	NC		NC	NC	264344_at	26084.9	24234.5	25159.7	P	P	0.000244	0.000244	20961.5	21464.9	21213.2	P	P	0.000244	0.000244	-0.4	-0.2	-0.3	-0.2	-0.275	0.0957427	D	D	D	NC	3	-0.1	0	NC	NC	24669.3	25117.2	24893.2	P	P
264348_at	AT1G12110	12	4	4	4		NC	NC	D	NC	NC	NC	NC	NC	264348_at	12246.6	11072.7	11659.6	P	P	0.000244	0.000244	9652.2	12074.9	10863.5	P	P	0.000244	0.000244	-0.3	-0.2	-0.1	0	-0.15	0.129099	D	NC	NC	NC	1	-0.1	0.2	NC	NC	12057.2	12733.5	12395.4	P	P
259519_at	AT1G12270	12	4	4	4	NC	NC	NC	I	NC	NC	NC	NC	NC	259519_at	868.7	800.9	834.8	P	P	0.000244	0.000244	1013.2	968.2	990.7	P	P	0.000244	0.000244	0.4	0.3	0.3	0.2	0.3	0.0816497	NC	NC	NC	NC	4	0	-0.1	NC	NC	747.8	938.4	843.1	P	P
259520_at	AT1G12320	8	2	4	2	I	NC	NC		NC	NC		NC	NC	259520_at	249.7	212.2	230.95	A	A	0.246094	0.129639	389.1	263.9	326.5	P	P	0.037598	0.005859	1.2	1.1	0.8	0.7	0.95	0.238048	I	I	I	I	4	0.4	-0.2	NC	NC	282.1	211	246.55	P	P
261196_at	AT1G12860	12	4	4	4			NC	I	NC	NC		NC	NC	261196_at	710.6	799.7	755.15	P	P	0.005859	0.008057	1362.1	982.3	1172.2	P	P	0.001221	0.00293	0.9	0.6	0.3	0.2	0.5	0.316228	I	I	NC	NC	2	0.2	-0.5	NC	D	839	941	890	P	P
262780_at	AT1G13090	12	4	4	4	NC	NC	NC		NC	NC	I	NC	NC	262780_at	849.6	934.5	892.05	P	P	0.000244	0.000244	1110.1	905.9	1008	P	P	0.000244	0.000244	0.1	0.1	0	-0.1	0.025	0.0957427	NC	NC	NC	NC	4	-0.1	-0.1	NC	NC	825.5	1052	938.75	P	P
259364_at	AT1G13260	12	4	4	4	D	NC	NC		NC	NC		NC	NC	259364_at	1008.3	1095.2	1051.75	P	P	0.000732	0.001221	555.8	640.1	597.95	P	P	0.00293	0.001953	-0.8	-0.8	-0.7	-0.7	-0.75	0.057735	D	D	D	D	4	0.1	0	NC	NC	957.7	773.3	865.5	P	P
259363_at	AT1G13270	12	4	4	4		NC	NC	I	NC	NC	NC	NC	NC	259363_at	2752.2	2967.7	2859.95	P	P	0.000732	0.000732	3029.5	3669	3349.25	P	P	0.000732	0.000732	0.3	0.1	0.2	0.1	0.175	0.0957427	NC	NC	I	NC	3	0.2	0	NC	NC	2696.7	3094.6	2895.65	P	P
259362_s_at	AT1G13350	12	4	4	4			NC	I	NC	NC	NC	NC	NC	259362_s_at	666.1	692.8	679.45	P	P	0.000244	0.000244	894.8	611.5	753.15	P	P	0.000244	0.000244	0.6	0.3	0	-0.1	0.2	0.316228	I	NC	NC	NC	1	0.2	-0.6	NC	D	441.6	510.1	475.85	P	P
259385_at	AT1G13470	11	4	3	4		NC	NC		NC		I	NC	NC	259385_at	345.4	107.9	226.65	P	P	0.00293	0.000244	306.4	403.1	354.75	P	P	0.001953	0.00293	0.4	0.9	0.4	1.1	0.7	0.355903	NC	MI	NC	NC	3	-0.8	0.2	NC	NC	351.9	214.5	283.2	P	P
256071_at	AT1G13640	12	4	4	4	NC	NC	NC	I	NC	NC	NC	NC	NC	256071_at	790.7	805.4	798.05	P	P	0.000732	0.000244	841.6	720	780.8	P	P	0.000244	0.000244	0.1	0.1	-0.1	-0.1	0	0.11547	NC	NC	NC	NC	4	0	-0.3	NC	NC	679.9	630.3	655.1	P	P
256096_at	AT1G13650	4	0	1	3		NC	NC	I	NC	NC	D	NC	NC	256096_at	23.5	94.6	59.05	A	A	0.466064	0.27417	185.6	32.3	108.95	M	A	0.056152	0.366211	2.7	1	0.1	-0.9	0.725	1.52834	NC	I	NC	NC	3	1.8	-2.1	NC	NC	26.2	76.1	51.15	A	A
256100_at	AT1G13750	12	4	4	4	NC	NC	NC		NC	NC	I	NC	NC	256100_at	868.7	719.5	794.1	P	P	0.000244	0.000244	776.5	858	817.25	P	P	0.000244	0.000244	-0.1	0.1	-0.1	0	-0.025	0.0957427	NC	NC	NC	NC	4	-0.3	0.2	NC	NC	795.1	721.2	758.15	P	P
262615_at	AT1G13950	12	4	4	4			NC	D	NC	NC	NC	NC	NC	262615_at	982.5	880.1	931.3	P	P	0.005859	0.00415	748.3	1010.3	879.3	P	P	0.005859	0.00415	-0.7	-0.3	-0.3	0	-0.325	0.287228	D	D	NC	NC	2	-0.3	0.4	NC	I	1054	1213	1133.5	P	P
262607_at	AT1G13990	12	4	4	4	D	NC	NC			NC			NC	262607_at	2256.8	2139.3	2198.05	P	P	0.000244	0.000244	1779.9	1726.2	1753.05	P	P	0.000732	0.000732	-0.5	-0.3	-0.6	-0.5	-0.475	0.125831	D	D	D	D	4	-0.1	-0.1	NC	NC	2036.4	1797.1	1916.75	P	P
262648_at	AT1G14030	12	4	4	4	NC	NC	NC	I	NC	NC		NC	NC	262648_at	788.6	636.4	712.5	P	P	0.008057	0.00415	814.2	774.4	794.3	P	P	0.001953	0.000732	0.1	0.2	0	0.1	0.1	0.0816497	NC	NC	NC	NC	4	0	-0.1	NC	NC	753.2	848.8	801	P	P
262608_at	AT1G14120	12	4	4	4		NC	NC			NC	I	NC	NC	262608_at	1484.6	1466.7	1475.65	P	P	0.000244	0.000244	1231.7	1259.2	1245.45	P	P	0.000732	0.000244	-0.2	-0.4	-0.1	-0.3	-0.25	0.129099	D	D	NC	NC	2	0	0.1	NC	NC	1824.3	1443.4	1633.85	P	P
262656_at	AT1G14200	12	4	4	4		NC		D	NC	NC	NC	NC	NC	262656_at	793.6	564.9	679.25	P	P	0.000732	0.00415	423.5	411.6	417.55	P	P	0.01416	0.000244	-0.8	-0.6	-1.1	-0.6	-0.775	0.236291	D	D	D	NC	3	-0.4	0	D	NC	655.7	682.9	669.3	P	P
262657_at	AT1G14210	12	4	4	4		NC	NC	D	NC	NC	NC	NC	NC	262657_at	2040.6	2278.6	2159.6	P	P	0.000244	0.000244	1672	1839	1755.5	P	P	0.000244	0.000244	-0.4	-0.3	-0.3	-0.3	-0.325	0.05	D	D	NC	D	3	0	0.1	NC	NC	2128.7	2320.1	2224.4	P	P
261493_at	AT1G14410	12	4	4	4		NC	NC	I	NC	NC	NC	NC	NC	261493_at	1514.9	1411.6	1463.25	P	P	0.001221	0.001221	1837.2	1657	1747.1	P	P	0.000732	0.000732	0.2	0.2	0.2	0.2	0.2	0	NC	I	NC	NC	3	0	-0.1	NC	NC	1332.7	1473.4	1403.05	P	P
261489_at	AT1G14450	12	4	4	4			NC	D	NC	NC	NC	NC	NC	261489_at	4069.7	3669.2	3869.45	P	P	0.000244	0.000244	3224.2	3789.1	3506.65	P	P	0.000244	0.000244	-0.3	-0.2	0	0.1	-0.1	0.182574	D	D	NC	NC	2	-0.1	0.4	NC	I	4409.6	5015	4712.3	P	P
261471_at	AT1G14460	11	3	4	4		NC	NC	I	NC	NC	NC	NC	NC	261471_at	283.4	362.7	323.05	A	P	0.080566	0.005859	326.1	276.8	301.45	P	P	0.000244	0.000244	0.7	0	0.5	-0.3	0.225	0.457347	I	NC	I	NC	2	0.5	-0.2	NC	NC	272.3	248.9	260.6	P	P
262830_at	AT1G14700	12	4	4	4	I	NC	NC	I	NC			NC	NC	262830_at	1037.7	1106	1071.85	P	P	0.000732	0.000244	1836.1	1559.3	1697.7	P	P	0.000244	0.000244	1	0.8	0.7	0.7	0.8	0.141421	I	I	I	I	4	0.2	-0.1	NC	NC	1205.3	851.2	1028.25	P	P
262844_at	AT1G14890	12	4	4	4		NC	NC			NC	I	NC	NC	262844_at	2382.5	1593.7	1988.1	P	P	0.000732	0.000732	1074.1	1231.8	1152.95	P	P	0.001221	0.000732	-0.7	-0.4	-0.5	-0.2	-0.45	0.208167	D	D	D	NC	3	-0.3	0.2	NC	NC	1553.4	1407.9	1480.65	P	P
262838_at	AT1G14960	5	2	2	1	D	NC		D	NC	NC		NC	NC	262838_at	1380.5	1694.1	1537.3	P	P	0.030273	0.030273	720.7	769.2	744.95	A	A	0.080566	0.067627	-0.7	-1	-0.7	-0.9	-0.825	0.15	D	D	D	D	4	0.3	0.1	I	NC	1271.8	1113.5	1192.65	P	P
260739_at	AT1G15000	12	4	4	4	I	NC	NC		NC	NC	NC	NC	NC	260739_at	519.6	668.3	593.95	P	P	0.000244	0.000732	836.7	969.7	903.2	P	P	0.000244	0.000244	0.7	0.4	0.8	0.7	0.65	0.173205	I	I	I	I	4	0	0.2	NC	NC	497.3	657.6	577.45	P	P
260741_at	AT1G15040	2	1	1	0	D	NC	NC		NC	NC	NC	NC	NC	260741_at	672	354.5	513.25	P	A	0.037598	0.171387	73.5	38.4	55.95	A	A	0.80542	0.696289	-2.5	-2	-2.9	-3.5	-2.725	0.634429	D	D	D	D	4	-0.4	-0.9	NC	NC	489.7	415.4	452.55	P	A
262590_at	AT1G15100	12	4	4	4				D	NC	NC		NC	NC	262590_at	2448.6	1859.9	2154.25	P	P	0.001221	0.001221	1664.2	2415	2039.6	P	P	0.00415	0.000732	-0.3	0	0	0.4	0.025	0.287228	NC	NC	NC	I	3	-0.4	0.4	D	I	2220	2359.5	2289.75	P	P
262570_at	AT1G15200	12	4	4	4		NC		I	NC	NC	NC	NC	NC	262570_at	552.2	618.2	585.2	P	P	0.000732	0.000244	873.2	734.7	803.95	P	P	0.000732	0.000244	0.9	0.2	0.5	0.1	0.425	0.359398	I	NC	I	NC	2	0.4	-0.2	I	NC	499.5	601.9	550.7	P	P
262598_at	AT1G15260	12	4	4	4	I	NC	NC	NC	NC	NC		NC	NC	262598_at	525.8	505.7	515.75	P	P	0.00293	0.001221	912.6	701.9	807.25	P	P	0.000732	0.000244	0.6	0.6	0.4	0.4	0.5	0.11547	I	I	I	I	4	0.1	-0.2	NC	NC	727.2	552.1	639.65	P	P
262577_at	AT1G15290	12	4	4	4		NC	NC	I	NC	NC		NC	NC	262577_at	1489.1	1534.3	1511.7	P	P	0.000244	0.000244	1722	1478.8	1600.4	P	P	0.000732	0.000244	0.3	0.2	0	-0.2	0.075	0.221736	MI	NC	NC	NC	1	0.1	-0.3	NC	NC	1240	1282.3	1261.15	P	P
262600_at	AT1G15340	12	4	4	4		NC	NC	I	NC	NC	NC	NC	NC	262600_at	702.6	807.1	754.85	P	P	0.000244	0.000244	1115.6	1342.6	1229.1	P	P	0.000244	0.000244	0.5	0.4	0.4	0.3	0.4	0.0816497	I	I	I	NC	3	0.2	-0.2	NC	NC	747.1	687.7	717.4	P	P
261762_at	AT1G15510	12	4	4	4	NC	NC	NC	I	NC	NC	NC	NC	NC	261762_at	270	270.7	270.35	P	P	0.001221	0.00293	402.7	225.1	313.9	P	P	0.00415	0.000244	0.5	0.3	0.2	0.4	0.35	0.129099	NC	NC	NC	NC	4	-0.1	-0.4	NC	NC	284.3	255.9	270.1	P	P
259499_at	AT1G15730	12	4	4	4	NC	NC	NC		NC	NC	D	NC	NC	259499_at	1596.2	1549.4	1572.8	P	P	0.000244	0.000244	1843.3	1500.8	1672.05	P	P	0.000244	0.000244	0.2	0.2	0	0	0.1	0.11547	NC	NC	NC	NC	4	0	-0.2	NC	NC	1539.4	1484.2	1511.8	P	P
259491_at	AT1G15820;AT1G15810	12	4	4	4	NC	NC	NC	NC	NC	NC	D	NC	NC	259491_at	33590.8	31583.2	32587	P	P	0.000244	0.000244	35322.3	32267.2	33794.8	P	P	0.000244	0.000244	0.1	0.1	-0.1	0	0.025	0.0957427	NC	NC	NC	NC	4	-0.1	-0.2	NC	NC	33120.6	32512.7	32816.7	P	P
261844_at	AT1G15940	11	3	4	4	I	NC	NC	I	NC	NC	NC	NC	NC	261844_at	112.1	189.4	150.75	A	P	0.067627	0.00415	375.3	310	342.65	P	P	0.000732	0.000732	0.9	0.7	1.1	0.4	0.775	0.298608	I	I	I	I	4	0.5	-0.1	NC	NC	260.3	230.5	245.4	P	P
261843_at	AT1G16180	12	4	4	4		NC	NC	D	NC	NC	NC	NC	NC	261843_at	13614.2	12132.1	12873.1	P	P	0.000244	0.000244	11033.7	10912.8	10973.2	P	P	0.000244	0.000244	-0.4	-0.2	-0.3	-0.1	-0.25	0.129099	D	D	NC	NC	2	-0.2	0	NC	NC	11642.5	14177.3	12909.9	P	P
262705_at	AT1G16260	9	2	3	4			NC	NC		NC	I	NC	NC	262705_at	183.5	152	167.75	M	A	0.056152	0.171387	319.4	279.2	299.3	P	P	0.018555	0.037598	0.5	1	0.4	0.4	0.575	0.287228	NC	I	NC	NC	3	-0.3	-0.4	NC	D	167.2	139.6	153.4	P	A
255764_at	AT1G16720	12	4	4	4			NC		NC	NC	D	NC	NC	255764_at	3544.6	4336.7	3940.65	P	P	0.000244	0.000244	4839.7	3834.8	4337.25	P	P	0.000244	0.000244	0.5	0.2	-0.1	-0.3	0.075	0.35	I	NC	NC	NC	1	0.2	-0.4	NC	D	3808.7	3037.9	3423.3	P	P
262538_at	AT1G17140	12	4	4	4		NC	NC	I	NC	NC	NC	NC	NC	262538_at	257	187.4	222.2	P	P	0.008057	0.008057	366.2	275.5	320.85	P	P	0.000732	0.001953	0.8	0.6	0.4	0.4	0.55	0.191485	I	I	NC	NC	2	-0.1	-0.3	NC	NC	216.4	191.6	204	P	P
262483_at	AT1G17220	12	4	4	4		NC	NC	I	NC	NC	NC	NC	NC	262483_at	5827.8	6566.3	6197.05	P	P	0.000244	0.000244	7494.7	6676.1	7085.4	P	P	0.000244	0.000244	0.4	0.1	0.1	-0.1	0.125	0.206155	I	NC	NC	NC	1	0.2	-0.3	NC	NC	6025.9	5975	6000.45	P	P
260847_s_at	AT1G17290	12	4	4	4		NC	NC	D	NC	NC	NC	NC	NC	260847_s_at	7909.5	8215.2	8062.35	P	P	0.000244	0.000244	6917	6096.2	6506.6	P	P	0.000244	0.000244	-0.5	-0.3	-0.4	-0.1	-0.325	0.170783	D	D	D	NC	3	-0.2	0.2	NC	NC	6201.3	8869.7	7535.5	P	P
261031_at	AT1G17360	12	4	4	4		NC	NC	I	NC	NC	NC	NC	NC	261031_at	808.7	1001.4	905.05	P	P	0.000244	0.000244	1211.8	919.2	1065.5	P	P	0.000244	0.000244	0.6	0.3	0.2	0	0.275	0.25	I	NC	NC	NC	1	0.2	-0.3	NC	NC	1044.4	862.4	953.4	P	P
260685_at	AT1G17650	12	4	4	4		NC	NC	I	NC	NC	D	NC	NC	260685_at	681.2	761.2	721.2	P	P	0.018555	0.018555	920.7	851.3	886	P	P	0.01416	0.008057	0.4	0.2	0.2	0.1	0.225	0.125831	MI	NC	NC	NC	1	0.1	0	NC	NC	743.4	809.8	776.6	P	P
255890_at	AT1G17850	12	4	4	4	NC	NC	NC	I	NC	NC	NC	NC	NC	255890_at	252.8	267.6	260.2	P	P	0.008057	0.030273	341.2	234.1	287.65	P	P	0.01416	0.008057	0.3	0.3	0.2	-0.1	0.175	0.189297	NC	NC	NC	NC	4	0.2	-0.6	NC	NC	224.5	262.7	243.6	P	P
256072_at	AT1G18080	12	4	4	4	NC	NC	NC		NC	NC	D	NC	NC	256072_at	24082.3	22107.9	23095.1	P	P	0.000244	0.000244	21150.1	22377.8	21764	P	P	0.000244	0.000244	-0.2	0	-0.1	0	-0.075	0.0957427	NC	NC	NC	NC	4	-0.1	0.1	NC	NC	22874.7	24526.5	23700.6	P	P
256077_at	AT1G18100;AT1G18090	12	4	4	4	NC	NC	NC	I	NC	NC	NC	NC	NC	256077_at	290.4	351.9	321.15	P	P	0.000732	0.001953	391.3	302.3	346.8	P	P	0.000732	0.000732	0.2	0.1	0.2	-0.2	0.075	0.189297	NC	NC	NC	NC	4	0.2	-0.1	NC	NC	256.2	223.2	239.7	P	P
256129_at	AT1G18210	12	4	4	4	NC	NC	NC	D	NC	NC	NC	NC	NC	256129_at	4788.2	4774.2	4781.2	P	P	0.000244	0.000244	4349.8	4400.4	4375.1	P	P	0.000244	0.000244	-0.4	-0.1	-0.1	0	-0.15	0.173205	NC	NC	NC	NC	4	-0.1	0.2	NC	NC	4685.4	5211.3	4948.35	P	P
256125_at	AT1G18250	12	4	4	4	I	NC	NC	I	NC	NC		NC	NC	256125_at	877.3	1033.6	955.45	P	P	0.001953	0.000732	1584.3	1525.5	1554.9	P	P	0.001953	0.000244	0.8	0.7	0.7	0.5	0.675	0.125831	I	I	I	I	4	0.2	-0.2	NC	NC	865.3	1334.6	1099.95	P	P
261660_at	AT1G18370	12	4	4	4		NC		I	NC	NC		NC	NC	261660_at	99.6	358.7	229.15	P	P	0.001953	0.000732	357.9	304	330.95	P	P	0.000244	0.000732	1.5	0.3	1.5	-0.1	0.8	0.824621	I	NC	I	NC	2	0.9	-0.3	I	NC	272	322	297	P	P
255779_at	AT1G18650	12	4	4	4	I	NC	NC		NC	NC		NC	NC	255779_at	782.9	843.4	813.15	P	P	0.000244	0.000732	1100.6	1068.4	1084.5	P	P	0.000244	0.000244	0.4	0.6	0.4	0.4	0.45	0.1	I	I	I	I	4	-0.1	-0.2	NC	NC	1014.4	996.9	1005.65	P	P
261379_at	AT1G18720	12	4	4	4			NC	D	NC	NC	I	NC	NC	261379_at	12674.2	10658.5	11666.4	P	P	0.000244	0.000244	8803.6	10042.7	9423.15	P	P	0.000244	0.000244	-0.6	-0.4	-0.2	-0.1	-0.325	0.221736	D	D	NC	NC	2	-0.1	0.3	NC	I	11538.5	13156.7	12347.6	P	P
256017_at	AT1G19180	12	4	4	4	D	NC	NC				I		NC	256017_at	1109.4	1147.8	1128.6	P	P	0.000244	0.000244	631.7	651.1	641.4	P	P	0.000732	0.000244	-0.9	-0.7	-0.8	-0.6	-0.75	0.129099	D	D	D	D	4	-0.3	0	NC	NC	948.4	1598.1	1273.25	P	P
260656_at	AT1G19380	12	4	4	4	D		NC	D		NC	I	NC	NC	260656_at	4658.8	3940.7	4299.75	P	P	0.000244	0.000244	1374.4	2253.8	1814.1	P	P	0.000732	0.000244	-1.8	-1.6	-1	-0.8	-1.3	0.476095	D	D	D	D	4	-0.2	0.8	NC	I	4758.7	4377.3	4568	P	P
261149_s_at	AT1G19570	12	4	4	4		NC	NC	D		NC	I	NC	NC	261149_s_at	19907.9	20195.5	20051.7	P	P	0.000244	0.000244	16647.6	18294.1	17470.8	P	P	0.000244	0.000244	-0.3	-0.3	-0.2	-0.2	-0.25	0.057735	D	D	NC	NC	2	0	0	NC	NC	19444.2	19565.8	19505	P	P
261135_at	AT1G19610	12	4	4	4	D	NC				NC	I	NC	NC	261135_at	1108.9	739	923.95	P	P	0.000244	0.000244	667.8	449	558.4	P	P	0.000732	0.000244	-1	-0.4	-1.3	-0.8	-0.875	0.377492	D	D	D	D	4	-0.5	-0.3	D	NC	875.2	712.8	794	P	P
255786_at	AT1G19670	12	4	4	4			NC			NC	I	NC	NC	255786_at	5786.6	5679.6	5733.1	P	P	0.000244	0.000244	6773.2	5117.2	5945.2	P	P	0.000244	0.000244	0.2	0.2	-0.2	-0.2	0	0.23094	NC	I	NC	NC	3	-0.1	-0.4	NC	D	5436.5	5857.8	5647.15	P	P
261133_at	AT1G19715	12	4	4	4		NC		I	NC	NC	NC	NC	NC	261133_at	481.1	600.6	540.85	P	P	0.001953	0.000732	595	828.8	711.9	P	P	0.000244	0.000732	0.8	0.4	0.6	0.1	0.475	0.298608	I	NC	I	NC	2	0.6	-0.3	I	NC	423.9	487.5	455.7	P	P
255783_at	AT1G19870	12	4	4	4		NC	NC	I	NC	NC	NC	NC	NC	255783_at	432.9	522.7	477.8	P	P	0.000244	0.000244	641.2	572.4	606.8	P	P	0.000244	0.000244	0.4	0.5	0.3	0.2	0.35	0.129099	I	MI	NC	NC	1	-0.1	-0.2	NC	NC	490.2	591.9	541.05	P	P
255785_at	AT1G19920	12	4	4	4	NC	NC	NC	I	NC	NC	NC	NC	NC	255785_at	2720.1	2848.6	2784.35	P	P	0.000244	0.000244	2989.7	2998.6	2994.15	P	P	0.000244	0.000244	0.2	0.1	0.2	0.1	0.15	0.057735	NC	NC	NC	NC	4	0	-0.1	NC	NC	2579.2	2426.9	2503.05	P	P
261230_at	AT1G20010	12	4	4	4	NC	NC	NC	NC	NC	NC	D	NC	NC	261230_at	2570.8	2721.4	2646.1	P	P	0.000244	0.000244	2834.7	3142.5	2988.6	P	P	0.000244	0.000244	0.1	0	0.2	0.1	0.1	0.0816497	NC	NC	NC	NC	4	0.1	0.1	NC	NC	2749.1	2479.7	2614.4	P	P
262062_s_at	AT1G20570;AT1G80260	12	4	4	4	NC	NC	NC	I	NC	NC	NC	NC	NC	262062_s_at	377	455.9	416.45	P	P	0.00293	0.001953	436.7	405.1	420.9	P	P	0.000732	0.000732	0.4	0.2	0.3	0	0.225	0.170783	NC	NC	NC	NC	4	0.2	-0.5	NC	NC	368.7	419.2	393.95	P	P
256091_at	AT1G20693	12	4	4	4			NC	D	NC	NC	NC	NC	NC	256091_at	5300.4	4848.1	5074.25	P	P	0.000244	0.000244	3659.2	5059.2	4359.2	P	P	0.000244	0.000244	-0.6	-0.4	0	0.1	-0.225	0.330404	D	D	NC	NC	2	-0.1	0.4	NC	I	5161.3	5363.5	5262.4	P	P
256088_at	AT1G20810	12	4	4	4		NC	NC		NC	NC	D	NC	NC	256088_at	1508.2	1700.2	1604.2	P	P	0.01416	0.01416	1879.5	1487.8	1683.65	P	P	0.010742	0.010742	0.3	0.1	0.1	-0.1	0.1	0.163299	I	NC	NC	NC	1	0.2	-0.2	NC	NC	1748.9	1623.1	1686	P	P
262800_at	AT1G20960	12	4	4	4		NC	NC	I	NC	NC	NC	NC	NC	262800_at	1682.1	1686.1	1684.1	P	P	0.000732	0.000244	1937.9	1828.5	1883.2	P	P	0.000244	0.000244	0.3	0.2	0.3	0.1	0.225	0.0957427	NC	NC	I	NC	3	0.2	-0.1	NC	NC	1393.3	1600.5	1496.9	P	P
261459_at	AT1G21100;AT1G21130;AT1G21110	11	4	4	3	D	NC	NC			NC	I	NC	NC	261459_at	570.2	575.5	572.85	P	P	0.00293	0.001221	268.9	286.5	277.7	P	P	0.008057	0.008057	-1	-1.2	-1.1	-1	-1.075	0.0957427	D	D	D	D	4	-0.2	0.3	NC	NC	750.2	515.4	632.8	P	P
259561_at	AT1G21250	12	4	4	4		NC		D	NC	NC	I			259561_at	3790.7	2567.1	3178.9	P	P	0.000732	0.000244	3090.5	2931.2	3010.85	P	P	0.001221	0.000732	-0.4	0.2	-0.3	0.2	-0.075	0.320156	D	NC	MD	NC	1	-0.4	0.2	D	NC	3314	2809.5	3061.75	P	P
260875_at	AT1G21410	12	4	4	4		NC	NC			NC	I	NC	NC	260875_at	1354.1	1621	1487.55	P	P	0.000244	0.000244	1235.4	1181.8	1208.6	P	P	0.001953	0.000244	-0.1	-0.3	-0.4	-0.4	-0.3	0.141421	NC	D	NC	D	2	0	-0.2	NC	NC	1325.8	1117.8	1221.8	P	P
260876_at	AT1G21460	12	4	4	4	D	NC	NC		NC	NC	NC	NC	NC	260876_at	3355.9	3323.2	3339.55	P	P	0.000244	0.000244	2749.9	2445.9	2597.9	P	P	0.000244	0.000244	-0.3	-0.3	-0.4	-0.3	-0.325	0.05	D	D	D	D	4	-0.1	-0.1	NC	NC	3149.2	4009.3	3579.25	P	P
260877_at	AT1G21500	12	4	4	4		NC	NC		NC	NC	D	NC	NC	260877_at	2908	2585.7	2746.85	P	P	0.000244	0.000732	4070.9	4112.7	4091.8	P	P	0.000244	0.000732	0.3	0.4	0.2	0.3	0.3	0.0816497	I	I	NC	I	3	-0.1	-0.1	NC	NC	3589.9	3772	3680.95	P	P
260922_at	AT1G21560	12	4	4	4			NC	I	NC	NC	NC	NC	NC	260922_at	321	423.7	372.35	P	P	0.000244	0.00293	805	643	724	P	P	0.000244	0.000244	0.8	0.8	0.4	0.4	0.6	0.23094	I	I	NC	NC	2	0.2	-0.3	NC	MD	615.7	385.2	500.45	P	P
262491_at	AT1G21650	12	4	4	4		NC	NC	I	NC	NC	NC	NC	NC	262491_at	170	172.2	171.1	P	P	0.030273	0.030273	279.6	239.3	259.45	P	P	0.010742	0.001221	0.7	0.7	0.4	0.3	0.525	0.206155	I	MI	NC	NC	1	-0.1	-0.4	NC	NC	181.8	175.7	178.75	P	P
262501_at	AT1G21690	12	4	4	4	NC	NC	NC	I	NC	NC	NC	NC	NC	262501_at	847.4	935.5	891.45	P	P	0.000732	0.000732	1009.7	1167.1	1088.4	P	P	0.000732	0.000244	0.3	0.4	0.2	0.2	0.275	0.0957427	NC	NC	NC	NC	4	0	-0.1	NC	NC	665.6	806	735.8	P	P
260856_at	AT1G21910	12	4	4	4	D		NC	D	NC	NC	NC	NC	NC	260856_at	1274.9	1255.8	1265.35	P	P	0.000732	0.000244	518.9	707.1	613	P	P	0.000732	0.000732	-1.1	-1.2	-0.8	-0.9	-1	0.182574	D	D	D	D	4	0.1	0.3	NC	I	1272.7	1382.1	1327.4	P	P
255959_at	AT1G21980	12	4	4	4		NC	NC	I	NC	NC	NC	NC	NC	255959_at	771.7	882.6	827.15	P	P	0.00415	0.001953	1230.3	906.8	1068.55	P	P	0.00293	0.001953	0.5	0.3	0.3	0	0.275	0.206155	I	NC	NC	NC	1	0.2	-0.3	NC	NC	767.1	544.5	655.8	P	P
255957_at	AT1G22160	9	2	3	4	I	NC	NC	NC	NC	NC	NC	NC	NC	255957_at	242.1	275.4	258.75	A	A	0.095215	0.080566	645.4	648	646.7	P	P	0.00415	0.001953	1.3	1	1.3	1.4	1.25	0.173205	I	I	I	I	4	0.2	-0.1	NC	NC	211.9	311.5	261.7	P	A
255926_at	AT1G22190	12	4	4	4	D	NC	NC	D	NC	NC	NC	NC	NC	255926_at	1102.6	1019.2	1060.9	P	P	0.000244	0.000244	631.4	633.8	632.6	P	P	0.000244	0.000244	-0.8	-0.6	-0.9	-0.7	-0.75	0.129099	D	D	D	D	4	-0.2	-0.2	NC	NC	1414.7	1041.5	1228.1	P	P
261931_at	AT1G22430	12	4	4	4				I	NC	NC	NC	NC	NC	261931_at	923.4	1166.8	1045.1	P	P	0.01416	0.00415	1577.3	1106.5	1341.9	P	P	0.00293	0.00415	0.8	0.4	0.3	0	0.375	0.330404	I	I	NC	NC	2	0.4	-0.4	I	D	992.4	841.4	916.9	P	P
261937_at	AT1G22570	12	4	4	4	D	NC	NC		NC		NC	NC	NC	261937_at	622.5	613.5	618	P	P	0.001953	0.001221	480.7	450.3	465.5	P	P	0.018555	0.005859	-0.4	-0.4	-0.5	-0.4	-0.425	0.05	D	D	D	D	4	-0.2	-0.1	NC	NC	487.3	750	618.65	P	P
264195_at	AT1G22690	12	4	4	4	NC	NC	NC	D	NC	NC	NC	NC	NC	264195_at	6958.4	6518.7	6738.55	P	P	0.000244	0.000244	6866	7990.4	7428.2	P	P	0.000244	0.000244	-0.1	0.1	0.1	0.2	0.075	0.125831	NC	NC	NC	NC	4	-0.2	0.2	NC	NC	7033.3	6646.8	6840.05	P	P
264901_at	AT1G23090	12	4	4	4	D	NC	NC	NC	NC	NC	NC	NC	NC	264901_at	3321.9	2974.5	3148.2	P	P	0.000244	0.000244	2401.4	2161.3	2281.35	P	P	0.000244	0.000244	-0.5	-0.3	-0.4	-0.4	-0.4	0.0816497	D	D	D	D	4	-0.1	-0.1	NC	NC	2572.5	2885.7	2729.1	P	P
264887_at	AT1G23120	12	4	4	4	NC	NC	NC		NC		I	NC	NC	264887_at	690.9	698.2	694.55	P	P	0.01416	0.01416	470.6	489.3	479.95	P	P	0.01416	0.00415	-0.4	-0.4	-0.3	0	-0.275	0.189297	NC	NC	NC	NC	4	0	0.2	NC	NC	789.9	496.4	643.15	P	P
264893_at	AT1G23140	12	4	4	4			NC	D	NC	NC	NC	NC	NC	264893_at	1004.9	847.2	926.05	P	P	0.000732	0.000732	463.8	680.5	572.15	P	P	0.005859	0.001221	-1.2	-0.7	-0.6	-0.2	-0.675	0.411299	D	D	D	MD	3	-0.3	0.4	NC	I	934.3	1031.8	983.05	P	P
262986_at	AT1G23390	12	4	4	4	D	NC	NC	D	NC		D	NC	NC	262986_at	4400.5	3940.1	4170.3	P	P	0.000732	0.000732	1216.2	1147	1181.6	P	P	0.00293	0.001221	-1.3	-1.2	-1.7	-1.5	-1.425	0.221736	D	D	D	D	4	-0.2	-0.1	NC	NC	4228.5	2883	3555.75	P	P
265187_at	AT1G23490	12	4	4	4		NC	NC	D	NC	NC	NC	NC	NC	265187_at	11749.8	9971.1	10860.5	P	P	0.000244	0.000244	8605.1	10544.4	9574.75	P	P	0.000244	0.000244	-0.4	-0.2	-0.2	0	-0.2	0.163299	D	D	NC	NC	2	-0.1	0.2	NC	NC	10932.7	12687.8	11810.2	P	P
265028_at	AT1G24530	12	4	4	4	D		NC	D	NC	NC	NC		NC	265028_at	1487.7	1105.4	1296.55	P	P	0.000732	0.000244	533.3	1009.3	771.3	P	P	0.00415	0.001953	-1.7	-1.4	-0.9	-0.8	-1.2	0.424264	D	D	D	D	4	-0.3	0.8	NC	I	1369.4	1064	1216.7	P	P
265025_at	AT1G24575	12	4	4	4	D	NC	NC	D	NC	NC	NC	NC	NC	265025_at	1574.5	1391.5	1483	P	P	0.000244	0.000244	985.6	1191.5	1088.55	P	P	0.000244	0.000244	-0.7	-0.5	-0.5	-0.5	-0.55	0.1	D	D	D	D	4	-0.1	0.1	NC	NC	1892.6	1634	1763.3	P	P
265021_at	AT1G24610	12	4	4	4	NC	NC	NC	NC	NC	NC	D	NC	NC	265021_at	1217.4	1080.5	1148.95	P	P	0.000732	0.000244	1203.1	1259.8	1231.45	P	P	0.000732	0.000732	0	0.2	0.1	0.2	0.125	0.0957427	NC	NC	NC	NC	4	0	0.1	NC	NC	1103.5	1106.4	1104.95	P	P
245642_at	AT1G25275	12	4	4	4		NC		D	NC	NC		NC	NC	245642_at	17720.1	14725	16222.5	P	P	0.000244	0.000244	11934.3	12899.3	12416.8	P	P	0.000244	0.000244	-0.5	-0.2	-0.5	-0.2	-0.35	0.173205	D	D	D	NC	3	-0.3	0.1	D	NC	17739.4	18345.2	18042.3	P	P
255733_at	AT1G25400	10	3	3	4	D	NC	NC	D	NC		NC	NC	NC	255733_at	507.4	487.6	497.5	P	P	0.00293	0.00293	237.5	260.4	248.95	A	P	0.144531	0.01416	-1.3	-1	-0.9	-1	-1.05	0.173205	D	D	D	D	4	0	0.5	NC	NC	605.5	415.9	510.7	P	P
255742_at	AT1G25560	12	4	4	4	D	NC		D	NC	NC	D	NC	NC	255742_at	3697.5	3083.8	3390.65	P	P	0.000732	0.000732	897.1	1075.8	986.45	P	P	0.008057	0.00415	-1.8	-1.5	-1.8	-1.4	-1.625	0.206155	D	D	D	D	4	-0.2	0	D	NC	2858.5	2443.7	2651.1	P	P
245876_at	AT1G26230	12	4	4	4		NC	NC	I	NC	NC	NC	NC	NC	245876_at	1053.9	1173.8	1113.85	P	P	0.000244	0.000244	1367.1	1283.5	1325.3	P	P	0.000244	0.000244	0.4	0.3	0.2	0.1	0.25	0.129099	I	NC	I	NC	2	0.2	-0.1	NC	NC	1054.7	1056.4	1055.55	P	P
260999_at	AT1G26580	12	4	4	4		NC	NC	I	NC	NC		NC	NC	260999_at	414.5	470.9	442.7	P	P	0.000244	0.000732	605.1	742.7	673.9	P	P	0.001221	0.000732	0.7	0.5	0.7	0.1	0.5	0.282843	I	MI	NC	NC	1	0.3	-0.1	NC	NC	341	440	390.5	P	P
261269_at	AT1G26690	12	4	4	4	NC	NC	NC			NC	I	NC	NC	261269_at	806.1	870.9	838.5	P	P	0.010742	0.005859	746.4	923.2	834.8	P	P	0.005859	0.001953	0	0	0.1	0.1	0.05	0.057735	NC	NC	NC	NC	4	0.1	0.1	NC	NC	1225	838.5	1031.75	P	P
261265_at	AT1G26800	11	4	3	4		NC	NC	D	NC	NC	NC	NC	NC	261265_at	602.7	603.6	603.15	P	P	0.00293	0.00293	480.5	462.7	471.6	P	P	0.018555	0.00293	-0.6	-0.3	-0.8	-0.4	-0.525	0.221736	D	NC	D	MD	2	-0.2	0	NC	NC	449.8	596.4	523.1	P	P
263685_at	AT1G26830	12	4	4	4	NC	NC	NC	I	NC	NC	NC	NC	NC	263685_at	921.9	870.2	896.05	P	P	0.000244	0.000244	918.7	1068.8	993.75	P	P	0.000244	0.000244	0.1	0.2	-0.1	0.2	0.1	0.141421	NC	NC	NC	NC	4	-0.2	-0.1	NC	NC	998.9	960.1	979.5	P	P
264987_at	AT1G27030	12	4	4	4	NC	NC	NC			NC	I	NC	NC	264987_at	2157.2	1938.4	2047.8	P	P	0.000244	0.000244	2184.1	2139.7	2161.9	P	P	0.000244	0.000244	0	0	0	0.1	0.025	0.05	NC	NC	NC	NC	4	-0.1	0.2	NC	NC	1794.4	1946.2	1870.3	P	P
264447_at	AT1G27300	12	4	4	4	D	NC	NC		NC	NC	NC	NC	NC	264447_at	1421.8	1552.6	1487.2	P	P	0.000244	0.000244	1103.3	1229.2	1166.25	P	P	0.000244	0.000244	-0.4	-0.5	-0.4	-0.4	-0.425	0.05	D	D	D	D	4	0.1	0.1	NC	NC	1222.2	1296.4	1259.3	P	P
264488_s_at	AT1G27330	12	4	4	4			NC	D	NC	NC		NC	NC	264488_s_at	6139.7	5976.9	6058.3	P	P	0.000244	0.000732	5046.5	5731.5	5389	P	P	0.000244	0.000244	-0.4	-0.2	-0.2	0	-0.2	0.163299	D	D	NC	NC	2	-0.2	0.3	NC	I	6768	7215.4	6991.7	P	P
264437_at	AT1G27510	12	4	4	4	NC	NC	NC	I	NC	NC	NC	NC	NC	264437_at	572.6	750.8	661.7	P	P	0.008057	0.00415	974.3	748.9	861.6	P	P	0.00415	0.001953	0.5	0.4	0.1	0	0.25	0.238048	NC	NC	NC	NC	4	0.1	-0.3	NC	NC	578.7	553.5	566.1	P	P
261648_at	AT1G27730	12	4	4	4	D	NC	NC	D		NC	NC	NC	NC	261648_at	1707.2	1312	1509.6	P	P	0.000732	0.001221	527.1	566.5	546.8	P	P	0.037598	0.008057	-1.5	-1.2	-1.4	-1.1	-1.3	0.182574	D	D	D	D	4	-0.2	0.1	NC	NC	1680.5	1738.9	1709.7	P	P
259588_at	AT1G27930	12	4	4	4		NC	NC	D	NC	NC	NC	NC	NC	259588_at	3627.8	3033.8	3330.8	P	P	0.000244	0.000244	2482.3	2424.9	2453.6	P	P	0.000244	0.000244	-0.7	-0.4	-0.4	-0.1	-0.4	0.244949	D	D	D	NC	3	-0.3	0.3	NC	NC	3460.6	3577.2	3518.9	P	P
259592_at	AT1G27950	12	4	4	4		NC	NC	NC	NC	NC	D	NC	NC	259592_at	5007.8	4633.5	4820.65	P	P	0.000244	0.000244	5937.3	5729.8	5833.55	P	P	0.000244	0.000244	0.3	0.3	0.2	0.3	0.275	0.05	NC	I	NC	I	2	-0.1	-0.1	NC	NC	4970.8	6064	5517.4	P	P
259593_at	AT1G27970	12	4	4	4			NC	D	NC	NC	NC	NC	NC	259593_at	7525.6	6572.7	7049.15	P	P	0.000244	0.000244	4990.6	5956.9	5473.75	P	P	0.000244	0.000244	-0.5	-0.4	-0.3	-0.1	-0.325	0.170783	D	D	D	NC	3	-0.2	0.3	NC	I	7767.6	7731	7749.3	P	P
259585_at	AT1G28090	12	4	4	4	NC	NC	NC	I	NC	NC	NC	NC	NC	259585_at	377.2	326.9	352.05	P	P	0.001221	0.000732	374.9	323.2	349.05	P	P	0.001953	0.000732	0.2	0.1	-0.2	-0.1	6.93889e-18	0.182574	NC	NC	NC	NC	4	-0.1	-0.1	NC	NC	309.9	382.1	346	P	P
259599_at	AT1G28110	12	4	4	4	I	NC	NC	NC	NC	NC	NC	NC	NC	259599_at	959.1	766	862.55	P	P	0.000244	0.000244	1485.4	1460.6	1473	P	P	0.000244	0.000244	0.4	0.6	0.5	0.5	0.5	0.0816497	I	I	I	I	4	-0.1	-0.1	NC	NC	961.6	961.5	961.55	P	P
245688_at	AT1G28290	12	4	4	4		NC	NC	NC	NC	NC	D	NC	NC	245688_at	10636.4	10156.5	10396.5	P	P	0.000244	0.000244	11814.4	12718	12266.2	P	P	0.000244	0.000244	0.1	0.2	0.3	0.3	0.225	0.0957427	NC	NC	NC	I	3	0	0.1	NC	NC	8844.4	9163.6	9004	P	P
262733_s_at	AT1G28670	12	4	4	4					NC	NC	I	NC	NC	262733_s_at	3466.8	2505.7	2986.25	P	P	0.000732	0.000732	1219.3	1750.8	1485.05	P	P	0.000732	0.000244	-1.4	-1.1	-0.7	-0.2	-0.85	0.519615	D	D	D	NC	3	-0.5	0.8	D	I	2412.9	2901.4	2657.15	P	P
262744_at	AT1G28680	12	4	4	4		NC	NC	D	NC	NC	NC	NC	NC	262744_at	1459.4	1517.9	1488.65	P	P	0.000244	0.000244	1241.3	1524.9	1383.1	P	P	0.000732	0.000732	-0.3	-0.2	-0.2	-0.2	-0.225	0.05	D	D	NC	NC	2	0	0.1	NC	NC	1773.1	1822.5	1797.8	P	P
259767_s_at	AT1G29350;AT1G29370	12	4	4	4		NC		I	NC	NC	NC	NC	NC	259767_s_at	2281.8	2489.4	2385.6	P	P	0.000244	0.000244	3096.1	2800.6	2948.35	P	P	0.000244	0.000244	0.5	0.2	0.4	0.2	0.325	0.15	I	NC	I	NC	2	0.2	0	I	NC	1966.8	2370.5	2168.65	P	P
259789_at	AT1G29395	12	4	4	4			NC	D	NC	NC				259789_at	716.8	720.4	718.6	P	P	0.008057	0.01416	915.9	1271.8	1093.85	P	P	0.018555	0.001953	0.3	0.2	1	0.8	0.575	0.386221	NC	NC	I	I	2	-0.1	0.6	NC	I	788.7	887.5	838.1	P	P
259790_s_at	AT1G29430	12	4	4	4		NC	NC				D	NC	NC	259790_s_at	395.6	341.9	368.75	P	P	0.000732	0.00293	781.6	671.9	726.75	P	P	0.000244	0.000732	0.8	1.1	0.4	0.8	0.775	0.287228	I	I	NC	I	3	-0.2	-0.3	NC	NC	601	499.6	550.3	P	P
259773_at	AT1G29500	7	2	2	3		NC	NC	NC		NC	D	NC	NC	259773_at	116.8	255.3	186.05	A	P	0.095215	0.037598	187	186.1	186.55	M	P	0.056152	0.030273	0.2	-0.1	0.3	-0.1	0.075	0.206155	NC	NC	I	NC	3	0.5	-0.1	NC	NC	172.3	121.9	147.1	M	M
259783_at	AT1G29510	12	4	4	4		NC	NC				D	NC	NC	259783_at	562	406.3	484.15	P	P	0.00415	0.000244	680.6	413	546.8	P	P	0.000244	0.000244	0.4	0.5	-0.3	-0.1	0.125	0.386221	I	I	NC	NC	2	-0.1	-0.5	NC	NC	589.7	343.2	466.45	P	P
259775_at	AT1G29530	12	4	4	4		NC	NC	I	NC	NC	NC	NC	NC	259775_at	813.2	1091	952.1	P	P	0.001953	0.00415	869.7	1017.3	943.5	P	P	0.001953	0.001953	0.5	0.4	0.2	-0.1	0.25	0.264575	I	NC	NC	NC	1	0.3	-0.4	NC	NC	554.1	914.3	734.2	P	P
259786_at	AT1G29660	12	4	4	4	I	NC	NC		NC	NC		NC	NC	259786_at	3441.5	3663	3552.25	P	P	0.000244	0.000244	6366.3	5861.3	6113.8	P	P	0.000244	0.000244	0.9	0.8	0.8	0.7	0.8	0.0816497	I	I	I	I	4	0.1	-0.1	NC	NC	3726.2	4041	3883.6	P	P
259788_at	AT1G29670	12	4	4	4	I	NC	NC	I		NC	NC	NC	NC	259788_at	2916.3	3062.3	2989.3	P	P	0.000244	0.000244	4402.6	4604.5	4503.55	P	P	0.000244	0.000244	0.5	0.6	0.6	0.7	0.6	0.0816497	I	I	I	I	4	-0.2	0.1	NC	NC	3031.9	3006.3	3019.1	P	P
255997_s_at	AT1G29920;AT1G29910;AT1G29930	12	4	4	4	NC	NC	NC			NC	D	NC	NC	255997_s_at	46314.2	39060.8	42687.5	P	P	0.000244	0.000244	42182.6	40753.1	41467.8	P	P	0.000244	0.000244	-0.2	0.1	-0.2	0	-0.075	0.15	NC	NC	NC	NC	4	-0.3	0	NC	NC	43503.4	46762.2	45132.8	P	P
261806_at	AT1G30510	12	4	4	4		NC	NC		NC	NC	D	NC	NC	261806_at	2036.5	2749.5	2393	P	P	0.000244	0.000244	2628.5	2102.8	2365.65	P	P	0.000244	0.000244	0.3	0	0.5	0.3	0.275	0.206155	NC	NC	I	NC	3	0.3	0.2	NC	NC	2755.6	2509.9	2632.75	P	P
261804_at	AT1G30530	12	4	4	4	I	NC	NC		NC	NC	NC	NC	NC	261804_at	852.5	796.4	824.45	P	P	0.000732	0.000244	1235.1	1038.6	1136.85	P	P	0.000244	0.000244	0.5	0.5	0.3	0.5	0.45	0.1	I	I	I	I	4	-0.1	-0.1	NC	NC	875.1	886.8	880.95	P	P
263226_at	AT1G30690	12	4	4	4		NC	NC		NC	NC	D	NC	NC	263226_at	703	758	730.5	P	P	0.000732	0.000244	968	907	937.5	P	P	0.000244	0.000244	0.6	0.4	0.4	0.2	0.4	0.163299	I	NC	I	NC	2	0.2	0.2	NC	NC	734.3	736.1	735.2	P	P
263228_at	AT1G30700	12	4	4	4		NC	NC			NC	I	NC	NC	263228_at	249.6	258.5	254.05	P	P	0.018555	0.01416	468.1	449.3	458.7	P	P	0.008057	0.005859	0.5	0.9	0.6	0.6	0.65	0.173205	MI	NC	I	I	1	-0.1	-0.1	NC	NC	485.2	429.8	457.5	P	P
264529_at	AT1G30820	12	4	4	4	NC	NC	NC	I	NC	NC		NC	NC	264529_at	963.8	931.5	947.65	P	P	0.005859	0.00293	1004.5	981.2	992.85	P	P	0.00415	0.00415	0.2	0.2	0.1	0.1	0.15	0.057735	NC	NC	NC	NC	4	0	-0.2	NC	NC	777.8	701.2	739.5	P	P
265102_at	AT1G30870	12	4	4	4			NC	D	NC	NC		NC	NC	265102_at	1127.4	1129.4	1128.4	P	P	0.023926	0.018555	516.7	1092.3	804.5	P	P	0.037598	0.030273	-0.8	-0.7	-0.3	-0.2	-0.5	0.294392	D	D	NC	NC	2	-0.1	0.4	NC	I	1094.1	1038.1	1066.1	P	P
256489_at	AT1G31550	12	4	4	4		NC	NC		NC	NC	I	NC	NC	256489_at	800.9	773.2	787.05	P	P	0.023926	0.030273	714.4	850.7	782.55	P	P	0.008057	0.008057	0	0.3	0.1	0.4	0.2	0.182574	NC	NC	NC	I	3	-0.2	0.1	NC	NC	673	708.4	690.7	P	P
256497_at	AT1G31580	12	4	4	4		NC		D	NC	NC		NC	NC	256497_at	3417.4	3151.7	3284.55	P	P	0.008057	0.010742	3118.6	3950.1	3534.35	P	P	0.010742	0.005859	-0.1	0.4	0	0.5	0.2	0.294392	NC	I	NC	I	2	-0.5	0.1	D	NC	3172.5	2837.9	3005.2	P	P
246573_at	AT1G31680	4	1	1	2	I	NC	NC			NC	NC	NC	NC	246573_at	20.1	15.4	17.75	A	A	0.559082	0.753906	67.6	230.6	149.1	A	P	0.303711	0.030273	1.3	1.5	3.7	3	2.375	1.1644	I	I	I	I	4	0.1	1.3	NC	NC	157	88.9	122.95	A	A
246602_at	AT1G31710	12	4	4	4	NC	NC	NC	NC		NC	I	NC	NC	246602_at	236.4	270.3	253.35	P	P	0.008057	0.001221	180.9	227.6	204.25	P	P	0.00293	0.00415	-0.8	-0.5	-0.3	-0.3	-0.475	0.236291	NC	NC	NC	NC	4	-0.2	0.2	NC	NC	305.3	252.7	279	P	P
246601_at	AT1G31710	12	4	4	4	NC	NC	NC			NC	I	NC	NC	246601_at	3350.5	2698.4	3024.45	P	P	0.000244	0.000244	3297	2909.3	3103.15	P	P	0.000244	0.000244	0	0.1	-0.1	0	0	0.0816497	NC	NC	NC	NC	4	-0.2	-0.2	NC	NC	2758	2580.1	2669.05	P	P
246268_at	AT1G31800	12	4	4	4		NC	NC	I	NC	NC	NC	NC	NC	246268_at	2618.7	3005.9	2812.3	P	P	0.000244	0.000244	3401.8	2815	3108.4	P	P	0.000244	0.000244	0.4	0.2	0.1	0	0.175	0.170783	I	NC	NC	NC	1	0.2	-0.2	NC	NC	3139.6	2531	2835.3	P	P
246261_at	AT1G31810	12	4	4	4	NC	NC	NC	I	NC	NC	NC	NC	NC	246261_at	491.7	463.7	477.7	P	P	0.000244	0.000732	543.9	500.5	522.2	P	P	0.000244	0.000244	0.3	0.2	-0.1	0	0.1	0.182574	NC	NC	NC	NC	4	-0.1	-0.4	NC	NC	469.9	463.6	466.75	P	P
246313_at	AT1G31920	10	3	3	4		NC	NC	I	NC	NC	NC	NC	NC	246313_at	359.3	497.2	428.25	P	A	0.023926	0.111572	602.5	460.8	531.65	P	P	0.023926	0.023926	0.5	0.5	0	-0.2	0.2	0.355903	I	I	NC	NC	2	0.1	-0.4	NC	NC	375.9	242.7	309.3	P	A
246312_at	AT1G31930	12	4	4	4	NC	NC	NC	I	NC	NC	NC	NC	NC	246312_at	575.8	755.2	665.5	P	P	0.008057	0.018555	897	723.1	810.05	P	P	0.030273	0.008057	0.2	0.4	0.3	0.2	0.275	0.0957427	NC	NC	NC	NC	4	-0.1	-0.2	NC	NC	465.9	621.9	543.9	P	P
255749_at	AT1G31970	12	4	4	4		NC		I	NC	NC		NC	NC	255749_at	2063	2517.2	2290.1	P	P	0.001953	0.001953	3502.5	2883.9	3193.2	P	P	0.00415	0.001953	0.6	0.3	0.4	0	0.325	0.25	I	NC	I	NC	2	0.3	-0.2	I	NC	2228.3	2156.9	2192.6	P	P
245790_at	AT1G32200	12	4	4	4		NC	NC	I	NC	NC	D	NC	NC	245790_at	1852.2	1929.4	1890.8	P	P	0.000244	0.000244	2580.9	2057.1	2319	P	P	0.000244	0.000244	0.4	0.3	0.1	0.1	0.225	0.15	MI	I	NC	NC	1	0	-0.3	NC	NC	1821.3	1839.3	1830.3	P	P
245793_at	AT1G32220	12	4	4	4		NC	NC		NC	NC	D	NC	NC	245793_at	2228.4	2141.4	2184.9	P	P	0.000244	0.000244	3232	2579.9	2905.95	P	P	0.000244	0.000244	0.5	0.5	0.2	0.2	0.35	0.173205	I	I	NC	NC	2	-0.1	-0.2	NC	NC	2673.5	2510.6	2592.05	P	P
260693_at	AT1G32450	12	4	4	4	I	NC	NC	I	NC	NC	NC	NC	NC	260693_at	4331.7	4956.2	4643.95	P	P	0.000244	0.000244	5901.9	6524.7	6213.3	P	P	0.000244	0.000244	0.5	0.3	0.6	0.5	0.475	0.125831	I	I	I	I	4	0.1	0.1	NC	NC	3477	3836.2	3656.6	P	P
260651_at	AT1G32460	12	4	4	4	D	NC	NC		NC	NC	NC	NC	NC	260651_at	6633.9	5650.8	6142.35	P	P	0.000244	0.000244	4063.4	4468.5	4265.95	P	P	0.000244	0.000244	-0.7	-0.4	-0.5	-0.3	-0.475	0.170783	D	D	D	D	4	-0.2	0.2	NC	NC	6631	6187.1	6409.05	P	P
261713_at	AT1G32640	12	4	4	4	NC	NC	NC	NC		NC	I	NC	NC	261713_at	1079.6	977.7	1028.65	P	P	0.000244	0.000244	913.3	957.7	935.5	P	P	0.000244	0.000244	-0.1	0	-0.1	-0.2	-0.1	0.0816497	NC	NC	NC	NC	4	0.2	0	NC	NC	873.6	957.2	915.4	P	P
261711_at	AT1G32700	12	4	4	4	D	NC	NC		NC	NC	NC	NC	NC	261711_at	2603.8	1922.1	2262.95	P	P	0.000244	0.000244	1521.4	1679.7	1600.55	P	P	0.000244	0.000244	-0.2	-0.3	-0.4	-0.4	-0.325	0.0957427	D	D	D	D	4	-0.2	0	NC	NC	2389.7	1946.5	2168.1	P	P
261701_at	AT1G32750	12	4	4	4		NC	NC	I	NC	NC	NC	NC	NC	261701_at	762.4	685.1	723.75	P	P	0.001221	0.000732	911.9	965.1	938.5	P	P	0.000244	0.000244	0.2	0.3	0	0.2	0.175	0.125831	NC	I	NC	NC	3	-0.1	0	NC	NC	761.4	650.7	706.05	P	P
261193_at	AT1G32920	12	4	4	4	D	NC	NC	D	NC	NC		NC	NC	261193_at	2410.5	2464.6	2437.55	P	P	0.000732	0.000732	1231.8	1495.8	1363.8	P	P	0.001953	0.001221	-1	-0.8	-0.9	-0.8	-0.875	0.0957427	D	D	D	D	4	-0.1	0.1	NC	NC	2691.2	2682.5	2686.85	P	P
261189_at	AT1G33040	12	4	4	4		NC	NC	I	NC	NC	NC	NC	NC	261189_at	2303.9	2707.5	2505.7	P	P	0.000244	0.000244	3099.3	2915.3	3007.3	P	P	0.000244	0.000244	0.2	0.1	0.2	0.1	0.15	0.057735	I	NC	NC	NC	1	0.1	-0.1	NC	NC	2529.9	2548.2	2539.05	P	P
261567_at	AT1G33055	12	4	4	4				D	NC	NC				261567_at	2278.8	1483.8	1881.3	P	P	0.000244	0.000244	1353.7	2079.5	1716.6	P	P	0.000244	0.000244	-0.8	-0.4	-0.1	0.2	-0.275	0.4272	D	MD	NC	I	1	-0.6	0.7	D	I	1281.1	1469	1375.05	P	P
261594_at	AT1G33240	12	4	4	4	NC	NC	NC	I	NC	NC		NC	NC	261594_at	986.5	1318.6	1152.55	P	P	0.000244	0.000244	1319.2	1090.6	1204.9	P	P	0.000244	0.000244	0.3	0	0.2	-0.3	0.05	0.264575	NC	NC	NC	NC	4	0.2	-0.2	NC	NC	954.5	839.7	897.1	P	P
256480_at	AT1G33410	12	4	4	4		NC	NC	I	NC	NC	NC	NC	NC	256480_at	727.2	780.6	753.9	P	P	0.001221	0.001953	1274.7	1030.6	1152.65	P	P	0.000732	0.000732	0.7	0.3	0.5	0.3	0.45	0.191485	I	I	I	NC	3	0.3	-0.2	NC	NC	783.6	744.1	763.85	P	P
261990_at	AT1G33660	4	1	2	1	D	NC	NC		NC		NC	NC	NC	261990_at	475	489.7	482.35	A	P	0.080566	0.046143	414.2	353.1	383.65	A	M	0.111572	0.056152	-0.5	-0.3	-0.3	-0.5	-0.4	0.11547	D	D	D	D	4	-0.1	0	NC	NC	334.8	655.2	495	P	P
256008_s_at	AT1G34040	12	4	4	4	I	NC	NC	NC	NC	NC	NC	NC	NC	256008_s_at	171.7	149.1	160.4	P	P	0.00293	0.001953	238	330.9	284.45	P	P	0.001953	0.000244	0.6	1.2	0.5	0.8	0.775	0.30957	I	I	I	I	4	-0.2	0	NC	NC	290.4	218.3	254.35	P	P
261159_s_at	AT1G34460	12	4	4	4		NC	NC	I	NC	NC	NC	NC	NC	261159_s_at	158.2	144.4	151.3	P	P	0.001953	0.000244	240.3	252.8	246.55	P	P	0.000244	0.000732	0.5	0.4	0.7	0.9	0.625	0.221736	I	NC	NC	NC	1	-0.1	0	NC	NC	198	141.7	169.85	P	P
245757_at	AT1G35140	5	2	2	1	D	NC	NC	D	NC	NC		NC	NC	245757_at	332.9	322.2	327.55	P	P	0.018555	0.023926	100.9	142.5	121.7	A	A	0.219482	0.171387	-1.7	-1.8	-1.3	-1.4	-1.55	0.238048	D	D	D	D	4	0.1	0.1	NC	NC	216.7	208.5	212.6	P	P
261339_at	AT1G35710	12	4	4	4		NC		NC	NC	NC	I	NC	NC	261339_at	291.9	170.8	231.35	P	P	0.000732	0.01416	692.9	407.2	550.05	P	P	0.005859	0.001953	0.6	1.1	0.2	0.8	0.675	0.377492	NC	I	NC	I	2	-0.5	-0.3	D	NC	243.6	276.2	259.9	P	P
261286_at	AT1G35780	12	4	4	4		NC	NC	I	NC	NC	NC	NC	NC	261286_at	1484.8	1628.7	1556.75	P	P	0.000732	0.000244	2156.4	2040.9	2098.65	P	P	0.000244	0.000244	0.3	0.3	0.4	0.3	0.325	0.05	I	NC	I	NC	2	0.1	0.1	NC	NC	1662.5	1605.5	1634	P	P
263192_at	AT1G36160	12	4	4	4		NC	NC	I	NC	NC		NC	NC	263192_at	1510.1	1542.8	1526.45	P	P	0.000244	0.000244	2156.4	1717.5	1936.95	P	P	0.000244	0.000244	0.3	0.2	0.1	0.1	0.175	0.0957427	I	NC	NC	NC	1	0.1	-0.2	NC	NC	1181.2	1402.7	1291.95	P	P
260125_at	AT1G36390	12	4	4	4		NC	NC	I	NC	NC	NC	NC	NC	260125_at	1325.9	1316	1320.95	P	P	0.000244	0.000244	1583.8	1365.4	1474.6	P	P	0.000244	0.000244	0.3	0.2	0.1	0	0.15	0.129099	I	NC	NC	NC	1	0.1	-0.2	NC	NC	1393.1	1255.1	1324.1	P	P
261363_at	AT1G41830	12	4	4	4	I	NC	NC		NC	NC		NC	NC	261363_at	3229.4	3306.9	3268.15	P	P	0.000244	0.000244	4147.8	4439.5	4293.65	P	P	0.000244	0.000244	0.3	0.3	0.4	0.4	0.35	0.057735	I	I	I	I	4	0	0	NC	NC	3148.1	3542.5	3345.3	P	P
260867_at	AT1G43790	12	4	4	4	I	NC	NC		NC		NC	NC	NC	260867_at	1411	1043.8	1227.4	P	P	0.000732	0.000244	1202.2	1345	1273.6	P	P	0.000244	0.000244	0.2	0.4	0.3	0.2	0.275	0.0957427	I	I	I	I	4	0	0.1	NC	NC	1368.2	884.4	1126.3	P	P
245739_at	AT1G44110	12	4	4	4		NC	NC	I	NC	NC	NC	NC	NC	245739_at	446.7	498.6	472.65	P	P	0.00293	0.000244	562.9	545.1	554	P	P	0.000732	0.001221	0.7	0.2	0.4	0	0.325	0.298608	I	NC	NC	NC	1	0.4	-0.1	NC	NC	554	445.8	499.9	P	P
245242_at	AT1G44446	12	4	4	4			NC	I	NC	NC	D	NC	NC	245242_at	2018.5	2150.3	2084.4	P	P	0.001221	0.001953	2755.8	2025.9	2390.85	P	P	0.000732	0.001953	0.7	0.7	0	0	0.35	0.404145	I	I	NC	NC	2	0.1	-0.6	NC	D	2026.3	1734.2	1880.25	P	P
261335_at	AT1G44800	12	4	4	4		NC		NC	NC	NC	D	NC	NC	261335_at	1621.8	1438.8	1530.3	P	P	0.000732	0.000244	1466	1675.6	1570.8	P	P	0.000244	0.000244	0.4	0.2	0.5	0.2	0.325	0.15	NC	NC	I	NC	3	0.2	0.1	MI	NC	1765.2	1348.7	1556.95	P	P
261330_at	AT1G44900	12	4	4	4	I	NC		I	NC	NC	NC	NC	NC	261330_at	403.2	480.3	441.75	P	P	0.008057	0.00415	724.1	600.7	662.4	P	P	0.001953	0.005859	1	0.7	0.9	0.6	0.8	0.182574	I	I	I	I	4	0.3	-0.4	I	NC	392.1	336.9	364.5	P	P
261333_at	AT1G44910	12	4	4	4	NC	NC	NC	I	NC	NC	NC	NC	NC	261333_at	285.8	345.6	315.7	P	P	0.000732	0.001221	423	345.7	384.35	P	P	0.000732	0.000732	0.2	0.4	0	0.2	0.2	0.163299	NC	NC	NC	NC	4	0.1	-0.2	NC	NC	267.8	271.3	269.55	P	P
260943_at	AT1G45145	12	4	4	4					NC	NC	I	NC	NC	260943_at	8295.3	5886.1	7090.7	P	P	0.000244	0.000244	5147.9	6035.9	5591.9	P	P	0.000244	0.000244	-0.5	-0.1	-0.3	0.1	-0.2	0.258199	D	NC	D	NC	2	-0.4	0.1	D	I	8132	7359.9	7745.95	P	P
245806_at	AT1G45474	12	4	4	4	NC	NC	NC	NC	NC	NC	D	NC	NC	245806_at	5108.9	5791.7	5450.3	P	P	0.000732	0.000732	6548.5	5303.9	5926.2	P	P	0.000732	0.000732	0.2	0.1	0.2	0	0.125	0.0957427	NC	NC	NC	NC	4	0.1	-0.1	NC	NC	5284.2	5302	5293.1	P	P
261684_at	AT1G47400	12	4	4	4	I	NC	NC			NC			NC	261684_at	181.3	247.7	214.5	P	P	0.023926	0.01416	619.5	479.7	549.6	P	P	0.001953	0.000244	1.8	1.2	1.1	0.8	1.225	0.419325	I	I	I	I	4	0.1	-0.5	NC	NC	302.1	232.1	267.1	P	P
262433_s_at	AT1G47500;AT1G47490	12	4	4	4		NC	NC	I	NC	NC	NC	NC	NC	262433_s_at	1633.1	2104.8	1868.95	P	P	0.000732	0.000244	2256	2400.6	2328.3	P	P	0.000244	0.000244	0.5	0.3	0.4	0.2	0.35	0.129099	NC	NC	I	NC	3	0	0	NC	NC	1953.8	2035.2	1994.5	P	P
262434_at	AT1G47670	12	4	4	4	I	NC	NC		NC	NC		NC	NC	262434_at	624.4	712.7	668.55	P	P	0.001953	0.00293	1044.6	958.4	1001.5	P	P	0.000732	0.001953	0.7	0.6	0.4	0.3	0.5	0.182574	I	I	I	I	4	0.3	-0.2	NC	NC	609.4	709.1	659.25	P	P
262238_at	AT1G48300;AT1G48310	12	4	4	4	I	NC		I	NC	NC			NC	262238_at	2342.8	3126.8	2734.8	P	P	0.000244	0.000244	5450.5	4447	4948.75	P	P	0.000244	0.000244	1.1	0.7	0.8	0.4	0.75	0.288675	I	I	I	I	4	0.3	-0.3	I	NC	3457.7	2846	3151.85	P	P
262237_at	AT1G48320	12	4	4	4	D	NC	NC	D	NC	NC			NC	262237_at	1836.7	1828.6	1832.65	P	P	0.000244	0.000244	1124.4	1226.9	1175.65	P	P	0.000244	0.000244	-0.6	-0.4	-0.6	-0.4	-0.5	0.11547	D	D	D	D	4	-0.2	0	NC	NC	2187.7	2246.2	2216.95	P	P
262235_at	AT1G48350	12	4	4	4	NC	NC	NC			NC	D	NC	NC	262235_at	15497.3	13823.3	14660.3	P	P	0.000244	0.000244	13773.1	13516.3	13644.7	P	P	0.000244	0.000244	-0.1	0	-0.2	0	-0.075	0.0957427	NC	NC	NC	NC	4	-0.2	0	NC	NC	15772	16694.1	16233	P	P
261308_at	AT1G48480	12	4	4	4	I	NC	NC	NC	NC	NC	NC	NC	NC	261308_at	879.9	710.9	795.4	P	P	0.000244	0.000244	1081.8	1204	1142.9	P	P	0.000244	0.000244	0.4	0.5	0.4	0.5	0.45	0.057735	I	I	I	I	4	-0.1	-0.1	NC	NC	838.7	1085.7	962.2	P	P
261307_at	AT1G48520	12	4	4	4		NC	NC	I	NC	NC	NC	NC	NC	261307_at	1119	1350.5	1234.75	P	P	0.000244	0.000732	1598.2	1294.3	1446.25	P	P	0.000732	0.000244	0.4	0.2	0.4	0.1	0.275	0.15	NC	NC	MI	NC	3	0	-0.1	NC	NC	1208.3	1088.9	1148.6	P	P
261301_at	AT1G48570	12	4	4	4		NC	NC	I	NC	NC		NC	NC	261301_at	1268	1275.6	1271.8	P	P	0.000244	0.000244	1644.3	1765.5	1704.9	P	P	0.000244	0.000244	0.2	0.3	0.1	0.2	0.2	0.0816497	I	NC	NC	NC	1	0.1	-0.1	NC	NC	1234.2	1480.1	1357.15	P	P
256140_at	AT1G48650	12	4	4	4		NC	NC	I	NC	NC	NC	NC	NC	256140_at	576.3	617.4	596.85	P	P	0.000732	0.000732	912.3	655.3	783.8	P	P	0.000732	0.000244	0.6	0.3	0.3	-0.1	0.275	0.287228	I	NC	I	NC	2	0.3	-0.4	NC	NC	611.8	499.8	555.8	P	P
260772_at	AT1G49050	12	4	4	4	NC	NC	NC			NC	I	NC	NC	260772_at	1179.6	994.8	1087.2	P	P	0.000732	0.000244	1031.3	1003.1	1017.2	P	P	0.000244	0.000244	0.1	0	0	0	0.025	0.05	NC	NC	NC	NC	4	0.1	-0.1	NC	NC	1068.4	1194.4	1131.4	P	P
260753_at	AT1G49230	12	4	4	4	I	NC	NC		NC	NC			NC	260753_at	438.5	582.8	510.65	P	P	0.008057	0.00293	860.3	749.3	804.8	P	P	0.001953	0.000732	0.7	0.6	0.8	0.4	0.625	0.170783	I	I	I	I	4	0.2	-0.1	NC	NC	473.1	414.3	443.7	P	P
262397_at	AT1G49380	12	4	4	4		NC		I	NC	NC	NC		NC	262397_at	940	1075.1	1007.55	P	P	0.000732	0.000244	1212.9	1099.6	1156.25	P	P	0.000244	0.000244	0.5	0.2	0.2	0.1	0.25	0.173205	I	NC	I	NC	2	0.3	-0.2	I	NC	1041.4	930	985.7	P	P
262414_at	AT1G49430	12	4	4	4		NC	NC	I	NC	NC		NC	NC	262414_at	674.8	798.7	736.75	P	P	0.000732	0.000244	943.3	1010.2	976.75	P	P	0.000244	0.000244	0.4	0.5	0.4	0.2	0.375	0.125831	I	I	I	NC	3	0	-0.1	NC	NC	762.1	696.1	729.1	P	P
261606_at	AT1G49570	12	4	4	4		NC	NC	D	NC	NC		NC	NC	261606_at	305.8	375.7	340.75	P	P	0.000244	0.008057	271.7	217	244.35	P	P	0.00293	0.010742	-0.2	-0.3	-0.4	-0.5	-0.35	0.129099	NC	NC	D	MD	2	0	-0.2	NC	NC	525.5	483.5	504.5	P	P
261605_at	AT1G49580	12	4	4	4		NC	NC	I	NC	NC	NC	NC	NC	261605_at	459.8	527.4	493.6	P	P	0.001221	0.000732	852.4	683.9	768.15	P	P	0.001221	0.000732	0.7	0.5	0.5	0.4	0.525	0.125831	MI	NC	I	NC	1	0.2	-0.2	NC	NC	495.3	576.9	536.1	P	P
261614_at	AT1G49760	12	4	4	4		NC	NC		NC	NC	D	NC	NC	261614_at	3808.7	3431.3	3620	P	P	0.000244	0.000244	4026.9	4822	4424.45	P	P	0.000244	0.000244	0.2	0.1	0.2	0.2	0.175	0.05	NC	NC	I	NC	3	0.2	0	NC	NC	4047.9	4176.1	4112	P	P
261691_at	AT1G50060	12	4	4	4			NC	D	NC	NC	NC	NC	NC	261691_at	764.4	594.8	679.6	P	P	0.00293	0.005859	450.9	564.5	507.7	P	P	0.01416	0.00293	-0.5	-0.4	-0.3	-0.1	-0.325	0.170783	D	D	NC	NC	2	-0.2	0.4	NC	I	890.6	883.8	887.2	P	P
261636_at	AT1G50110	11	4	4	3		NC		I	NC	NC	NC	NC	NC	261636_at	426.3	541.1	483.7	P	P	0.030273	0.01416	761.3	662.3	711.8	P	P	0.008057	0.001953	0.8	0.4	0.8	0.3	0.575	0.262996	I	NC	I	NC	2	0.5	-0.1	I	NC	518.7	457.2	487.95	P	P
261689_at	AT1G50140	12	4	4	4		NC	NC	I	NC	NC	NC	NC	NC	261689_at	385.7	462.7	424.2	P	P	0.000244	0.001953	730.5	540.6	635.55	P	P	0.000732	0.000244	0.6	0.4	0.5	0.1	0.4	0.216025	I	I	I	NC	3	0.2	-0.3	NC	NC	481.3	462.8	472.05	P	P
262419_at	AT1G50380	12	4	4	4		NC	NC	I	NC	NC	NC	NC	NC	262419_at	991.9	1188.2	1090.05	P	P	0.000732	0.000732	1175.8	1023.6	1099.7	P	P	0.000244	0.000244	0.4	0.2	0.2	-0.2	0.15	0.251661	I	MI	NC	NC	1	0.2	-0.3	NC	NC	1035	826.1	930.55	P	P
261862_at	AT1G50410	12	4	4	4	NC	NC	NC	I	NC	NC	NC	NC	NC	261862_at	506.8	531	518.9	P	P	0.000244	0.001221	631.2	476.6	553.9	P	P	0.000244	0.000244	0.1	0.5	0.2	-0.1	0.175	0.25	NC	NC	NC	NC	4	0.1	-0.2	NC	NC	303.2	442.3	372.75	P	P
261861_at	AT1G50450	12	4	4	4		NC	NC	I	NC	NC	NC	NC	NC	261861_at	955.8	910.2	933	P	P	0.000244	0.000244	1295.7	1005.5	1150.6	P	P	0.000244	0.000244	0.5	0.4	0.2	0	0.275	0.221736	I	I	NC	NC	2	0.1	-0.4	NC	NC	898.2	952	925.1	P	P
261859_at	AT1G50490	12	4	4	4	NC	NC	NC	I	NC	NC	NC	NC	NC	261859_at	965.8	1160.9	1063.35	P	P	0.001953	0.001221	1334.9	1339.9	1337.4	P	P	0.001221	0.000244	0.4	0.2	0.3	0.1	0.25	0.129099	NC	NC	NC	NC	4	0.2	0	NC	NC	1062.4	1232.6	1147.5	P	P
261853_at	AT1G50660	12	4	4	4		NC	NC	I	NC	NC	NC	NC	NC	261853_at	722.4	817.9	770.15	P	P	0.000244	0.000244	850.8	988.2	919.5	P	P	0.000244	0.000244	0.4	0.2	0.3	0.1	0.25	0.129099	I	NC	I	NC	2	0.2	-0.2	NC	NC	680.8	749.4	715.1	P	P
246631_at	AT1G50740	12	4	4	4		NC	NC	D	NC	NC		NC	NC	246631_at	2208.3	1968.8	2088.55	P	P	0.001221	0.001221	1630.9	1603.1	1617	P	P	0.001953	0.001221	-0.3	-0.1	-0.3	-0.1	-0.2	0.11547	D	NC	NC	NC	1	-0.1	-0.1	NC	NC	2005.3	2081.7	2043.5	P	P
256204_at	AT1G50840	12	4	4	4	NC	NC	NC	I	NC	NC	NC	NC	NC	256204_at	707.4	862.8	785.1	P	P	0.018555	0.030273	931.8	762.6	847.2	P	P	0.01416	0.01416	0.4	0.3	0.1	0.1	0.225	0.15	NC	NC	NC	NC	4	0.1	-0.3	NC	NC	750.8	766.4	758.6	P	P
256207_at	AT1G50920	12	4	4	4	I	NC	NC	I	NC	NC		NC	NC	256207_at	1764	2118.6	1941.3	P	P	0.000244	0.000732	2428.9	2635.7	2532.3	P	P	0.000244	0.000244	0.4	0.3	0.4	0.3	0.35	0.057735	I	I	I	I	4	0	-0.1	NC	NC	2154.2	2244.4	2199.3	P	P
265150_at	AT1G51200	12	4	4	4		NC		D	NC	NC		NC	NC	265150_at	15891.2	12442.5	14166.9	P	P	0.000244	0.000244	11459.1	12144.9	11802	P	P	0.000244	0.000244	-0.4	-0.1	-0.3	0.1	-0.175	0.221736	D	NC	D	NC	2	-0.4	0.1	D	NC	12323.9	12979.2	12651.5	P	P
265149_at	AT1G51400	12	4	4	4		NC	NC	NC	NC	NC	D	NC	NC	265149_at	17964.6	16831.8	17398.2	P	P	0.000244	0.000244	22647.2	20108.8	21378	P	P	0.000244	0.000244	0.3	0.3	0.1	0.1	0.2	0.11547	I	I	NC	NC	2	0	-0.2	NC	NC	18560.5	16726.6	17643.5	P	P
256170_at	AT1G51790	12	4	4	4		NC	NC		NC	NC	I	NC	NC	256170_at	505.4	504.6	505	P	P	0.000244	0.000244	251.3	546.2	398.75	P	P	0.008057	0.000732	-1.1	-1.2	0	0.1	-0.55	0.695222	D	D	NC	NC	2	0	0.9	NC	NC	537.1	674.2	605.65	P	P
256169_at	AT1G51800	12	4	4	4			NC				I	NC	NC	256169_at	894.5	823.8	859.15	P	P	0.00293	0.001953	605.5	653.4	629.45	P	P	0.00293	0.001221	-0.8	-0.5	-0.4	-0.3	-0.5	0.216025	D	D	D	NC	3	-0.1	0.3	NC	I	758.6	1121	939.8	P	P
256168_at	AT1G51805	12	4	4	4		NC	NC		NC	NC	D	NC	NC	256168_at	742.8	550.6	646.7	P	P	0.000244	0.000244	1026	916.1	971.05	P	P	0.000244	0.000244	0.5	0.6	0.2	0.5	0.45	0.173205	I	I	NC	I	3	-0.2	-0.2	NC	NC	650.1	984.4	817.25	P	P
246368_at	AT1G51890	12	4	4	4	NC	NC	NC		NC	NC	I	NC	NC	246368_at	301.4	356	328.7	P	P	0.001221	0.005859	280.3	341	310.65	P	P	0.008057	0.001221	-0.3	-0.3	0.1	0	-0.125	0.206155	NC	NC	NC	NC	4	0.4	0.2	NC	NC	332.8	476.7	404.75	P	P
246371_at	AT1G51940	12	4	4	4	NC	NC	NC	I	NC	NC		NC	NC	246371_at	857.1	926	891.55	P	P	0.000244	0.000244	1077.7	1024.6	1051.15	P	P	0.000732	0.000732	0.2	0.1	0.2	0	0.125	0.0957427	NC	NC	NC	NC	4	0	-0.1	NC	NC	647	848.6	747.8	P	P
265053_at	AT1G52000	12	4	4	4	NC	NC	NC			NC	I	NC	NC	265053_at	1075.4	912	993.7	P	P	0.00293	0.00293	1000.4	763.7	882.05	P	P	0.01416	0.00293	0	0.2	-0.2	0	0	0.163299	NC	NC	NC	NC	4	-0.1	-0.2	NC	NC	870.1	887.2	878.65	P	P
259835_at	AT1G52160	12	4	4	4		NC	NC	I	NC	NC	NC	NC	NC	259835_at	692	699.5	695.75	P	P	0.01416	0.01001	928.1	831.2	879.65	P	P	0.00415	0.00293	0.5	0.4	0.1	0.2	0.3	0.182574	I	I	NC	NC	2	0.1	-0.3	NC	NC	591.2	526.6	558.9	P	P
259839_at	AT1G52190	12	4	4	4	I	NC	NC	NC	NC	NC			NC	259839_at	2205.5	2172.1	2188.8	P	P	0.000244	0.000244	2737.5	2875.2	2806.35	P	P	0.000244	0.000244	0.5	0.4	0.6	0.5	0.5	0.0816497	I	I	I	I	4	0	0	NC	NC	2665.6	1926.1	2295.85	P	P
259841_at	AT1G52200	12	4	4	4	D			D		NC	I	NC	NC	259841_at	4416.8	3618.8	4017.8	P	P	0.000244	0.000244	2123.8	3147	2635.4	P	P	0.001953	0.000244	-1.1	-0.8	-0.7	-0.5	-0.775	0.25	D	D	D	D	4	-0.2	0.5	D	I	4630.7	4414.6	4522.65	P	P
259840_at	AT1G52230	12	4	4	4	NC	NC	NC	NC		NC	D	NC	NC	259840_at	30211.6	33967.9	32089.8	P	P	0.000244	0.000244	38949.8	31815.1	35382.4	P	P	0.000244	0.000244	0.2	0.2	0.1	0.1	0.15	0.057735	NC	NC	NC	NC	4	-0.1	-0.1	NC	NC	35102.5	29809.6	32456	P	P
259611_at	AT1G52280	12	4	4	4		NC		I	NC	NC	NC	NC	NC	259611_at	176.3	273.8	225.05	P	P	0.000732	0.000244	480.9	345.1	413	P	P	0.000244	0.000244	1.2	0.5	1	0.4	0.775	0.386221	I	I	I	NC	3	0.5	-0.2	I	NC	230.1	361.6	295.85	P	P
259609_at	AT1G52410	12	4	4	4			NC			NC	I	NC	NC	259609_at	1047.5	957.8	1002.65	P	P	0.00293	0.01416	1295.4	813.5	1054.45	P	P	0.00293	0.00415	0.3	0.5	-0.4	-0.1	0.075	0.403113	NC	I	D	NC	2	-0.2	-0.6	NC	D	791.1	706.9	749	P	P
262129_at	AT1G52500	9	3	3	3		NC		I	NC	NC	NC	NC	NC	262129_at	74	142.2	108.1	A	P	0.19458	0.030273	266.3	189.9	228.1	P	P	0.037598	0.037598	1.6	0.1	1.2	0.1	0.75	0.768115	I	NC	I	NC	2	0.4	-0.2	MI	NC	141	204.1	172.55	P	M
260146_at	AT1G52770	11	3	4	4	NC	NC	NC	I	NC	NC	I	NC	NC	260146_at	391.9	352.6	372.25	P	P	0.018555	0.005859	366.3	365.6	365.95	A	P	0.080566	0.00415	-0.2	-0.1	0	0.2	-0.025	0.170783	NC	NC	NC	NC	4	-0.2	0	NC	NC	277.5	309.7	293.6	P	P
260590_at	AT1G53310	12	4	4	4			NC	D	NC	NC	NC	NC	NC	260590_at	6684.8	6178.7	6431.75	P	P	0.000244	0.000244	4907.8	5929.3	5418.55	P	P	0.000244	0.000244	-0.5	-0.5	-0.2	-0.1	-0.325	0.206155	D	D	NC	NC	2	-0.1	0.3	NC	I	6063.1	6675.8	6369.45	P	P
260986_at	AT1G53580	12	4	4	4		NC	NC			NC	I	NC	NC	260986_at	2722	2107.3	2414.65	P	P	0.000732	0.001953	1884.1	2271.2	2077.65	P	P	0.001221	0.000732	-0.3	-0.1	-0.2	-0.1	-0.175	0.0957427	D	NC	NC	NC	1	-0.1	0.1	NC	NC	2182.7	2556.7	2369.7	P	P
262226_at	AT1G53885	6	2	3	1	D	NC	NC			NC		NC	NC	262226_at	210.5	138.9	174.7	P	P	0.018555	0.018555	64.3	47.7	56	A	A	0.129639	0.246094	-1.3	-1.1	-1.6	-1.3	-1.325	0.206155	D	D	D	D	4	-0.4	-0.4	NC	NC	151.1	157.5	154.3	P	P
263156_at	AT1G54030	12	4	4	4	NC	NC	NC			NC	I	NC	NC	263156_at	3446.2	2742.7	3094.45	P	P	0.000244	0.000244	2948.5	3027.8	2988.15	P	P	0.000244	0.000244	-0.1	0	-0.1	-0.1	-0.075	0.05	NC	NC	NC	NC	4	-0.1	0	NC	NC	2826.6	3296.4	3061.5	P	P
263157_at	AT1G54100	12	4	4	4		NC	NC			NC	I	NC	NC	263157_at	5641.2	5637.3	5639.25	P	P	0.000244	0.000244	4802.5	4830.9	4816.7	P	P	0.000244	0.000244	-0.2	-0.2	-0.1	-0.2	-0.175	0.05	NC	D	NC	NC	3	0	0.1	NC	NC	5333.1	6065.4	5699.25	P	P
262964_at	AT1G54380	12	4	4	4		NC	NC	I	NC	NC	NC	NC	NC	262964_at	346.2	456.5	401.35	P	P	0.001953	0.001953	628.5	554	591.25	P	P	0.000732	0.000732	0.9	0.4	0.5	0.1	0.475	0.330404	I	I	NC	NC	2	0.4	-0.3	NC	NC	419.7	413.5	416.6	P	P
264186_at	AT1G54570	12	4	4	4		NC	NC	D	NC	NC	I		NC	264186_at	846.7	914.8	880.75	P	P	0.001953	0.000732	760.7	885.4	823.05	P	P	0.001953	0.000732	-0.1	-0.2	-0.1	-0.3	-0.175	0.0957427	NC	D	NC	NC	3	0.2	0	NC	NC	911.1	1120.4	1015.75	P	P
256352_at	AT1G54970	12	4	4	4			NC	D	NC	NC	NC	NC	NC	256352_at	508.4	619.6	564	P	P	0.000732	0.000732	252	401.1	326.55	P	P	0.010742	0.001221	-0.6	-0.9	-0.3	-0.7	-0.625	0.25	D	D	NC	D	3	0.3	0.2	NC	I	512.3	534.2	523.25	P	P
259658_at	AT1G55370	12	4	4	4		NC	NC	I	NC	NC	NC	NC	NC	259658_at	406	563.6	484.8	P	P	0.000244	0.000244	718.1	622	670.05	P	P	0.000244	0.000244	0.8	0.4	0.4	0.1	0.425	0.287228	I	NC	I	NC	2	0.4	-0.4	NC	NC	615.6	578.7	597.15	P	P
265073_at	AT1G55480	12	4	4	4		NC	NC		NC		D	NC	NC	265073_at	5194.2	5650.1	5422.15	P	P	0.000244	0.000244	7136.5	5310	6223.25	P	P	0.000244	0.000244	0.4	0.3	0	-0.1	0.15	0.238048	I	NC	NC	NC	1	0.2	-0.2	NC	NC	7051.6	4511	5781.3	P	P
260601_at	AT1G55910	12	4	4	4	NC	NC	NC	NC	NC	NC	I	NC	NC	260601_at	1279.3	1155.3	1217.3	P	P	0.001221	0.00293	919.5	956	937.75	P	P	0.00293	0.000732	-0.3	-0.2	-0.2	-0.1	-0.2	0.0816497	NC	NC	NC	NC	4	-0.2	0.1	NC	NC	1180.3	797.1	988.7	P	P
262064_at	AT1G56070	12	4	4	4	NC	NC	NC	NC	NC	NC	D	NC	NC	262064_at	34567.4	31724.8	33146.1	P	P	0.000244	0.000244	30402.5	29668.6	30035.5	P	P	0.000244	0.000244	-0.2	-0.1	-0.1	0	-0.1	0.0816497	NC	NC	NC	NC	4	-0.1	0	NC	NC	31563.5	32850.2	32206.8	P	P
262094_at	AT1G56110	12	4	4	4		NC	NC	I		NC	D	NC	NC	262094_at	2692.8	2801.6	2747.2	P	P	0.000244	0.000244	4217.2	3626.6	3921.9	P	P	0.000244	0.000244	0.7	0.5	0.3	0.2	0.425	0.221736	I	I	I	NC	3	0.1	-0.3	NC	NC	2677.1	2958.6	2817.85	P	P
256220_at	AT1G56230	12	4	4	4	I	NC	NC		NC	NC	NC	NC	NC	256220_at	546.7	555.8	551.25	P	P	0.000244	0.000244	929.6	756.4	843	P	P	0.000244	0.000244	0.6	0.6	0.5	0.4	0.525	0.0957427	I	I	I	I	4	-0.2	0	NC	NC	618.2	509.9	564.05	P	P
259633_at	AT1G56500	12	4	4	4		NC	NC		NC	NC	D	NC	NC	259633_at	1184.8	1448	1316.4	P	P	0.000244	0.000732	1459.9	1410.4	1435.15	P	P	0.000732	0.000244	0.4	0	0.1	-0.2	0.075	0.25	I	NC	NC	NC	1	0.3	-0.3	NC	NC	1192.3	1032.4	1112.35	P	P
245629_at	AT1G56580	12	4	4	4	I	NC	NC		NC	NC		NC	NC	245629_at	4636.2	4133.5	4384.85	P	P	0.000244	0.000244	5978.7	5618.4	5798.55	P	P	0.000244	0.000244	0.4	0.5	0.3	0.4	0.4	0.0816497	I	I	I	I	4	-0.1	-0.1	NC	NC	5743	4770.8	5256.9	P	P
246403_at	AT1G57590	11	3	4	4		NC		NC	NC	NC	D	NC	NC	246403_at	574.6	553.5	564.05	P	P	0.010742	0.001953	457	275.5	366.25	A	P	0.080566	0.008057	-0.6	-1	-0.3	-0.8	-0.675	0.298608	NC	D	NC	D	2	0.4	-0.2	MI	NC	407.6	398.6	403.1	P	P
245828_at	AT1G57820	10	3	4	3		NC	NC	I	NC	NC		NC	NC	245828_at	419.6	547.2	483.4	M	P	0.056152	0.018555	482.5	555	518.75	P	P	0.008057	0.008057	0.4	0.1	0.3	0.2	0.25	0.129099	NC	NC	I	NC	3	0.3	0	NC	NC	346.3	485.6	415.95	P	P
245865_at	AT1G58025	7	3	3	1	D	NC		D	NC	NC	NC	NC	NC	245865_at	1119.4	1065.6	1092.5	P	M	0.018555	0.056152	704.1	530.4	617.25	P	P	0.037598	0.046143	-1.5	-1.1	-1.5	-1.1	-1.3	0.23094	D	D	D	D	4	-0.3	0.1	D	NC	1058.3	1070.7	1064.5	P	P
245219_at	AT1G58807;AT1G59124	12	4	4	4		NC	NC	I	NC	NC		NC	NC	245219_at	1045.2	1032.3	1038.75	P	P	0.005859	0.005859	1403.1	1180.9	1292	P	P	0.00293	0.00415	0.6	0.4	0.1	0.1	0.3	0.244949	I	I	NC	NC	2	0.1	-0.4	NC	NC	1055.3	1159.5	1107.4	P	P
262905_at	AT1G59730	11	4	3	4			NC	D	NC	NC	NC	NC	NC	262905_at	382.6	382.6	382.6	P	P	0.001953	0.001221	205.8	344	274.9	P	P	0.037598	0.001953	-0.8	-1	-0.1	0	-0.475	0.499166	D	D	NC	NC	2	0.1	0.7	NC	I	365	429.2	397.1	P	P
262900_at	AT1G59890	12	4	4	4			NC	I	NC	NC	NC	NC	NC	262900_at	522.8	540	531.4	P	P	0.046143	0.023926	772.1	422.4	597.25	P	P	0.00293	0.008057	0.5	0.4	-0.2	-0.3	0.1	0.408248	I	I	NC	NC	2	0.1	-0.7	NC	D	524.5	407.4	465.95	P	P
263679_at	AT1G59990	12	4	4	4	I	NC	NC	I	NC	NC		NC	NC	263679_at	1281.3	1465.9	1373.6	P	P	0.000244	0.000244	2440	1862.9	2151.45	P	P	0.000244	0.000244	0.8	0.7	0.4	0.3	0.55	0.238048	I	I	I	I	4	0	-0.3	NC	NC	1039.8	1130.7	1085.25	P	P
264218_at	AT1G60200	12	4	4	4		NC	NC	I	NC	NC	NC	NC	NC	264218_at	564.6	561.9	563.25	P	P	0.005859	0.00293	547.5	664.7	606.1	P	P	0.000244	0.000732	0.4	0.3	0.1	0	0.2	0.182574	I	I	NC	NC	2	0.2	-0.3	NC	NC	465.8	514.8	490.3	P	P
264920_at	AT1G60550	12	4	4	4		NC		I	NC	NC	NC	NC	NC	264920_at	2139.7	2394	2266.85	P	P	0.001953	0.000732	2474.6	2755.5	2615.05	P	P	0.00293	0.001953	0.4	0	0.4	0	0.2	0.23094	I	NC	I	NC	2	0.4	-0.1	MI	NC	2255.9	1974.6	2115.25	P	P
264931_at	AT1G60590	12	4	4	4	I	NC	NC	I	NC	NC	I		NC	264931_at	680	1068.9	874.45	P	P	0.00415	0.00293	1885	1727.9	1806.45	P	P	0.008057	0.001953	1	0.6	0.6	0.3	0.625	0.287228	I	I	I	I	4	0.3	-0.2	NC	NC	933.4	973.3	953.35	P	P
264930_at	AT1G60800	12	4	4	4		NC		I	NC	NC	NC	NC	NC	264930_at	786.6	999.3	892.95	P	P	0.000244	0.000244	1328.1	1165.5	1246.8	P	P	0.000244	0.000244	0.8	0.4	0.6	0.3	0.525	0.221736	I	I	I	NC	3	0.3	-0.2	MI	NC	908.3	903.7	906	P	P
259723_at	AT1G60960	12	4	4	4		NC	NC		NC	NC	I	NC	NC	259723_at	2893.8	3163.9	3028.85	P	P	0.000732	0.000244	2457.2	2158.5	2307.85	P	P	0.00415	0.000244	-0.5	-0.4	-0.4	-0.3	-0.4	0.0816497	D	D	MD	MD	2	-0.1	0.1	NC	NC	2679.5	2746	2712.75	P	P
259715_at	AT1G60990	12	4	4	4	NC	NC	NC	I	NC	NC	NC	NC	NC	259715_at	495.7	520.1	507.9	P	P	0.00293	0.001221	487.8	523.2	505.5	P	P	0.00293	0.001953	0.1	-0.1	-0.1	-0.2	-0.075	0.125831	NC	NC	NC	NC	4	0.1	-0.2	NC	NC	440.3	540.6	490.45	P	P
264910_at	AT1G61100	12	4	4	4	NC	NC	NC	I	NC	NC	NC	NC	NC	264910_at	779.9	773	776.45	P	P	0.000244	0.000244	745	708	726.5	P	P	0.000244	0.000244	0	0	-0.1	-0.1	-0.05	0.057735	NC	NC	NC	NC	4	0	-0.1	NC	NC	679.9	652.6	666.25	P	P
264885_s_at	AT1G61180	12	4	4	4		NC	NC	I	NC	NC	NC	NC	NC	264885_s_at	1067.7	1107.1	1087.4	P	P	0.000732	0.000244	1421.7	1338.8	1380.25	P	P	0.000244	0.000244	0.6	0.4	0.3	0.2	0.375	0.170783	I	I	I	NC	3	0.2	-0.1	NC	NC	1170.1	922.7	1046.4	P	P
264767_at	AT1G61380	12	4	4	4	D	NC	NC	NC	NC	NC		NC	NC	264767_at	637.2	577.6	607.4	P	P	0.000244	0.000732	442.6	411.3	426.95	P	P	0.001953	0.000244	-0.3	-0.4	-0.5	-0.4	-0.4	0.0816497	D	D	D	D	4	0	0.1	NC	NC	587.2	687.2	637.2	P	P
265033_at	AT1G61520	12	4	4	4	NC	NC	NC			NC	D	NC	NC	265033_at	48052.7	44002.2	46027.4	P	P	0.000244	0.000244	50061.5	42819.8	46440.7	P	P	0.000244	0.000244	0	0.1	-0.2	-0.1	-0.05	0.129099	NC	NC	NC	NC	4	-0.1	-0.2	NC	NC	44788.1	46677	45732.6	P	P
264286_at	AT1G61870	12	4	4	4		NC	NC	I	NC	NC	NC	NC	NC	264286_at	546.7	949.7	748.2	P	P	0.000732	0.000732	994.6	849.3	921.95	P	P	0.000244	0.000244	0.7	0.4	0.5	0.3	0.475	0.170783	I	NC	I	NC	2	0.2	-0.1	NC	NC	829.1	664.5	746.8	P	P
260638_at	AT1G62390	12	4	4	4		NC	NC	I	NC	NC	NC	NC	NC	260638_at	2308.8	2449.4	2379.1	P	P	0.000244	0.000244	3105.2	2631.8	2868.5	P	P	0.000244	0.000244	0.5	0.3	0.2	0	0.25	0.208167	I	I	NC	NC	2	0.1	-0.3	NC	NC	2295.5	2099.9	2197.7	P	P
265111_at	AT1G62510	10	3	4	3	D	NC	NC			NC		NC	NC	265111_at	1436.1	1311	1373.55	P	P	0.00415	0.00415	330.3	514.1	422.2	A	P	0.19458	0.030273	-1.5	-1.3	-1.4	-1.3	-1.375	0.0957427	D	D	D	D	4	-0.1	0.2	NC	NC	1095	1193.4	1144.2	P	P
262645_at	AT1G62750	12	4	4	4		NC		I	NC	NC			NC	262645_at	6377.4	7357.4	6867.4	P	P	0.000244	0.000244	9121.5	7946.6	8534.05	P	P	0.000244	0.000244	0.5	0.3	0.3	0	0.275	0.206155	I	I	I	NC	3	0.3	-0.1	I	NC	7285.6	6673.6	6979.6	P	P
262693_at	AT1G62780	12	4	4	4	NC	NC	NC		NC		D	NC	NC	262693_at	2204.3	2427.7	2316	P	P	0.000244	0.000244	3236	3129.3	3182.65	P	P	0.000244	0.000244	0.3	0.1	0.1	0.1	0.15	0.1	NC	NC	NC	NC	4	0.1	-0.1	NC	NC	3305.6	2660.6	2983.1	P	P
262694_at	AT1G62790	12	4	4	4	D		NC	D	NC	NC	NC	NC	NC	262694_at	5339.7	4883.8	5111.75	P	P	0.000244	0.000244	3042.9	4036.1	3539.5	P	P	0.000244	0.000244	-0.6	-0.5	-0.4	-0.3	-0.45	0.129099	D	D	D	D	4	-0.1	0.3	NC	I	5291.4	5742	5516.7	P	P
261099_at	AT1G62980	7	3	2	2			NC	D	NC	NC	NC	NC	NC	261099_at	791.6	733.8	762.7	P	P	0.046143	0.046143	470.7	621.5	546.1	A	P	0.095215	0.046143	-0.6	-0.7	-0.4	-0.4	-0.525	0.15	D	D	NC	NC	2	0.1	0.2	NC	I	836	786.2	811.1	P	P
261107_at	AT1G63010	12	4	4	4	NC	NC	NC			NC	I	NC	NC	261107_at	3879.7	3708.9	3794.3	P	P	0.000732	0.000244	3234.7	3792	3513.35	P	P	0.000732	0.000244	-0.2	-0.1	-0.1	0	-0.1	0.0816497	NC	NC	NC	NC	4	-0.1	0.1	NC	NC	3642.8	3959.2	3801	P	P
259689_x_at	AT1G63080;AT1G62910;AT1G63130;AT1G62930;AT1G63070	12	4	4	4	NC	NC	NC	I	NC	NC	NC	NC	NC	259689_x_at	491.4	603.7	547.55	P	P	0.000732	0.001221	816.1	892.9	854.5	P	P	0.001953	0.000244	0.5	0.3	0.4	0.1	0.325	0.170783	NC	NC	NC	NC	4	0.2	-0.2	NC	NC	665.9	589.4	627.65	P	P
261552_at	AT1G63430	12	4	4	4	NC	NC	NC	I	NC	NC	NC	NC	NC	261552_at	409.7	397.8	403.75	P	P	0.018555	0.010742	494.7	544.1	519.4	P	P	0.01416	0.008057	0.2	0.3	0.2	0.3	0.25	0.057735	NC	NC	NC	NC	4	0	-0.1	NC	NC	316.7	399.7	358.2	P	P
260292_at	AT1G63680	11	3	4	4		NC	NC	I	NC	NC		NC	NC	260292_at	603.5	697.8	650.65	A	P	0.067627	0.030273	832.5	835.3	833.9	P	P	0.030273	0.010742	0.6	0.3	0.6	0.3	0.45	0.173205	I	NC	I	NC	2	0.4	-0.1	NC	NC	705.2	754.3	729.75	P	P
260325_at	AT1G63940	12	4	4	4	NC	NC	NC	NC		NC	D	NC	NC	260325_at	9261.1	9242	9251.55	P	P	0.000244	0.000244	8130.1	9151.8	8640.95	P	P	0.000244	0.000244	-0.2	-0.2	-0.1	0	-0.125	0.0957427	NC	NC	NC	NC	4	0	0.1	NC	NC	8733.6	10050.7	9392.15	P	P
262354_at	AT1G64200	12	4	4	4	NC	NC	NC	NC	NC	NC	I	NC	NC	262354_at	1466.3	1282.3	1374.3	P	P	0.000244	0.000244	1315.2	1088.2	1201.7	P	P	0.000244	0.000244	0.1	0.1	-0.3	-0.2	-0.075	0.206155	NC	NC	NC	NC	4	-0.1	-0.2	NC	NC	1134.1	1095.7	1114.9	P	P
259766_at	AT1G64360	12	4	4	4	I	NC	NC	NC	NC	NC	NC	NC	NC	259766_at	1363.4	1207.1	1285.25	P	P	0.000244	0.000244	2230.2	1699.8	1965	P	P	0.000244	0.000244	0.6	0.7	0.5	0.7	0.625	0.0957427	I	I	I	I	4	-0.1	-0.1	NC	NC	1246.8	1140	1193.4	P	P
262005_at	AT1G64550	12	4	4	4		NC	NC	I	NC	NC	NC	NC	NC	262005_at	1591	1868.5	1729.75	P	P	0.000244	0.000244	2323.8	1969.4	2146.6	P	P	0.000244	0.000244	0.5	0.2	0.4	0.1	0.3	0.182574	I	NC	I	NC	2	0.2	-0.1	NC	NC	1744.1	1838	1791.05	P	P
262883_at	AT1G64780	12	4	4	4	I	NC	NC		NC	NC		NC		262883_at	679.8	645.3	662.55	P	P	0.000732	0.000244	1143.6	1309.8	1226.7	P	P	0.000244	0.000244	0.8	0.9	0.8	0.9	0.85	0.057735	I	I	I	I	4	0	0.1	NC	NC	791.9	716.6	754.25	P	P
262859_at	AT1G64790	12	4	4	4		NC	NC	I	NC	NC	NC	NC	NC	262859_at	1988.6	2165.4	2077	P	P	0.000244	0.000244	2683.3	2032.7	2358	P	P	0.000244	0.000244	0.5	0.3	0.1	0.1	0.25	0.191485	I	I	NC	NC	2	0.1	-0.3	NC	NC	1721.3	1985.2	1853.25	P	P
262879_at	AT1G64860	12	4	4	4		NC		I	NC	NC	NC	NC	NC	262879_at	2342.9	2927.3	2635.1	P	P	0.000244	0.000244	3993.8	2989.1	3491.45	P	P	0.000244	0.000244	0.8	0.4	0.5	0	0.425	0.330404	I	I	I	NC	3	0.4	-0.3	I	NC	3072.9	2291.9	2682.4	P	P
262880_at	AT1G64880	12	4	4	4		NC	NC	I	NC	NC	NC	NC	NC	262880_at	1684.5	1890.7	1787.6	P	P	0.000244	0.000244	2093.8	1971.5	2032.65	P	P	0.000244	0.000244	0.5	0.3	0.4	0.2	0.35	0.129099	I	NC	I	NC	2	0.2	-0.1	NC	NC	1367.9	1575.3	1471.6	P	P
262871_at	AT1G65010	12	4	4	4		NC	NC	I	NC	NC	NC	NC	NC	262871_at	480.8	575.8	528.3	P	P	0.000244	0.000244	935.3	844.2	889.75	P	P	0.000244	0.000244	0.8	0.4	0.5	0.4	0.525	0.189297	I	I	I	NC	3	0.2	-0.1	NC	NC	495.6	601.1	548.35	P	P
263111_s_at	AT1G65190	12	4	4	4	NC	NC	NC	I	NC	NC	NC	NC	NC	263111_s_at	1494.2	1782	1638.1	P	P	0.001953	0.008057	2635.1	1490.9	2063	P	P	0.001953	0.000732	0.3	0.1	0	0	0.1	0.141421	NC	NC	NC	NC	4	0.1	-0.2	NC	NC	2193.1	2487.7	2340.4	P	P
263142_at	AT1G65230	12	4	4	4		NC	NC	I	NC	NC	NC	NC	NC	263142_at	2662.4	3153.7	2908.05	P	P	0.000244	0.000244	4399.6	4059.9	4229.75	P	P	0.000244	0.000244	0.6	0.4	0.4	0.3	0.425	0.125831	I	I	I	NC	3	0.2	-0.1	NC	NC	2896.8	2678.2	2787.5	P	P
264158_at	AT1G65260	12	4	4	4		NC	NC	I	NC	NC	NC	NC	NC	264158_at	5843.9	6695.8	6269.85	P	P	0.000244	0.000244	7566.7	6745.9	7156.3	P	P	0.000244	0.000244	0.3	0.2	0.1	-0.1	0.125	0.170783	I	NC	NC	NC	1	0.1	-0.3	NC	NC	6537.2	6701.4	6619.3	P	P
264636_at	AT1G65490	12	4	4	4	D	NC		D	NC	NC			NC	264636_at	8933	6900.3	7916.65	P	P	0.000244	0.000244	4513.3	5181.4	4847.35	P	P	0.000244	0.000244	-0.9	-0.6	-0.7	-0.5	-0.675	0.170783	D	D	D	D	4	-0.3	0.1	D	NC	9961.9	9017.9	9489.9	P	P
264627_at	AT1G65520	12	4	4	4	NC	NC	NC	D	NC	NC	NC	NC	NC	264627_at	629.1	569.8	599.45	P	P	0.023926	0.023926	651.9	648.7	650.3	P	P	0.018555	0.018555	-0.4	-0.2	-0.2	-0.2	-0.25	0.1	NC	NC	NC	NC	4	-0.1	0.1	NC	NC	644	740.5	692.25	P	P
262926_s_at	AT1G65790;AT1G65800	10	3	3	4	NC	NC	NC	NC	NC	NC	I	NC	NC	262926_s_at	230	198	214	P	P	0.023926	0.023926	256.1	289.4	272.75	A	P	0.095215	0.008057	0.2	0.4	0.3	0.4	0.325	0.0957427	NC	NC	NC	NC	4	-0.1	0	NC	NC	282.9	212	247.45	P	P
261921_at	AT1G65900	12	4	4	4	I	NC	NC	I	NC	NC	NC	NC	NC	261921_at	590.2	549.6	569.9	P	P	0.000244	0.000244	787.4	962.6	875	P	P	0.000244	0.000244	0.5	0.5	0.7	0.4	0.525	0.125831	I	I	I	I	4	0.2	-0.1	NC	NC	763.4	541.9	652.65	P	P
256516_at	AT1G66150	12	4	4	4		NC	NC	I	NC	NC		NC	NC	256516_at	1984	2038.2	2011.1	P	P	0.000244	0.000244	2533.6	2729.2	2631.4	P	P	0.000244	0.000244	0.4	0.4	0.3	0.3	0.35	0.057735	I	MI	I	I	3	0.1	0	NC	NC	2184.4	1869.6	2027	P	P
256522_at	AT1G66160	12	4	4	4	D	NC		D	NC	NC		NC	NC	256522_at	827.9	532.8	680.35	P	P	0.000244	0.000732	354.5	432.5	393.5	P	P	0.001953	0.001953	-1.1	-0.6	-1.1	-0.4	-0.8	0.355903	D	D	D	D	4	-0.4	0	D	NC	848.6	684.2	766.4	P	P
256376_s_at	AT1G66690	12	4	4	4			NC	D	NC	NC				256376_s_at	926.7	1177.6	1052.15	P	P	0.001221	0.000244	665.2	528.5	596.85	P	P	0.00415	0.000732	-0.1	-0.3	-1	-1.3	-0.675	0.567891	NC	D	D	D	1	0.3	-0.9	NC	D	1909.9	1674.6	1792.25	P	P
256368_at	AT1G66800	12	4	4	4			NC		NC	NC	I	NC	NC	256368_at	1011.2	1070.8	1041	P	P	0.000244	0.000244	873.4	1062	967.7	P	P	0.000244	0.000244	-0.3	-0.3	-0.1	-0.1	-0.2	0.11547	NC	D	NC	NC	3	0.2	0.3	NC	I	1122.3	1075.5	1098.9	P	P
256366_at	AT1G66880	12	4	4	4	NC	NC	NC			NC	I	NC	NC	256366_at	406.5	346.4	376.45	P	P	0.000732	0.000244	388.3	369.1	378.7	P	P	0.000244	0.000244	-0.1	0.1	0.1	0.1	0.05	0.1	NC	NC	NC	NC	4	-0.1	0.2	NC	NC	414.8	340.7	377.75	P	P
245760_s_at	AT1G66920;AT1G66910	12	4	4	4		NC	NC	NC	NC	NC	I	NC	NC	245760_s_at	747.9	575.5	661.7	P	P	0.000244	0.001221	395.6	440.5	418.05	P	P	0.01416	0.00415	-0.5	-0.8	-0.2	-0.5	-0.5	0.244949	NC	D	NC	D	2	0.3	0.3	NC	NC	479.7	563.2	521.45	P	P
255856_at	AT1G66940	12	4	4	4		NC	NC		NC		D	NC	NC	255856_at	2553.6	2393.6	2473.6	P	P	0.008057	0.008057	3439.5	2599.4	3019.45	P	P	0.008057	0.005859	0.4	0.4	0.1	0.1	0.25	0.173205	NC	I	NC	NC	3	0	-0.2	NC	NC	2133.4	2710.9	2422.15	P	P
255851_at	AT1G67040	6	1	2	3		NC	NC	I	NC	NC		NC	NC	255851_at	92.4	169.4	130.9	A	A	0.533936	0.171387	168.9	229.3	199.1	A	P	0.067627	0.023926	1	0.2	1.3	0.4	0.725	0.512348	NC	I	I	I	1	1.1	-0.1	NC	NC	73.3	76.6	74.95	A	A
255857_at	AT1G67080	12	4	4	4		NC	NC	I	NC	NC	NC	NC	NC	255857_at	1728.9	1825.7	1777.3	P	P	0.000244	0.000244	2350	2059	2204.5	P	P	0.000244	0.000244	0.5	0.3	0.2	0	0.25	0.208167	I	I	NC	NC	2	0.1	-0.3	NC	NC	1681.8	1668.5	1675.15	P	P
264471_at	AT1G67120	12	4	4	4	I	NC	NC	I		NC	NC	NC	NC	264471_at	357.3	448.1	402.7	P	P	0.001221	0.000732	520.1	581	550.55	P	P	0.000244	0.001221	0.8	0.6	0.7	0.5	0.65	0.129099	I	I	I	I	4	0.2	-0.2	NC	NC	360.9	472.5	416.7	P	P
264996_at	AT1G67230	12	4	4	4			NC	I	NC	NC	NC	NC	NC	264996_at	770.6	933.7	852.15	P	P	0.000732	0.000732	1209.7	958.6	1084.15	P	P	0.000244	0.000244	0.7	0.4	0.2	0	0.325	0.298608	I	I	NC	NC	2	0.3	-0.3	NC	D	737.3	576.3	656.8	P	P
264969_at	AT1G67320	12	4	4	4	I	NC	NC	I	NC	NC	I	NC	NC	264969_at	639.6	432.8	536.2	P	P	0.018555	0.01416	761.7	952.3	857	P	P	0.001953	0.000244	0.7	0.8	0.3	0.7	0.625	0.221736	I	I	I	I	4	-0.2	-0.1	NC	NC	372.4	511.4	441.9	P	P
265001_at	AT1G67350	12	4	4	4		NC	NC	D	NC	NC	NC	NC	NC	265001_at	12989.9	10740.8	11865.4	P	P	0.000244	0.000244	9067.9	10497.9	9782.9	P	P	0.000244	0.000244	-0.3	-0.2	-0.2	0	-0.175	0.125831	D	NC	NC	NC	1	-0.2	0.1	NC	NC	11537.5	13642.7	12590.1	P	P
264968_at	AT1G67360	12	4	4	4	NC	NC	NC	D	NC	NC		NC	NC	264968_at	1680.2	1673.9	1677.05	P	P	0.000244	0.000244	1568.2	1696.4	1632.3	P	P	0.000244	0.000244	-0.1	-0.2	0	0	-0.075	0.0957427	NC	NC	NC	NC	4	0.1	0.2	NC	NC	1777.4	1932.7	1855.05	P	P
245195_at	AT1G67740	12	4	4	4	NC	NC	NC	NC		NC	D	NC	NC	245195_at	34394.9	31772.5	33083.7	P	P	0.000244	0.000244	33556.4	32206.1	32881.2	P	P	0.000244	0.000244	0	0	-0.1	-0.1	-0.05	0.057735	NC	NC	NC	NC	4	-0.1	-0.1	NC	NC	32225.4	38768.1	35496.8	P	P
245193_at	AT1G67810	12	4	4	4	D	NC	NC	D	NC	NC		NC		245193_at	1153.6	927.7	1040.65	P	P	0.00415	0.001221	538.3	705.9	622.1	P	P	0.046143	0.00415	-1.1	-1.1	-0.7	-0.4	-0.825	0.340343	D	D	D	D	4	-0.3	0.4	NC	NC	1253.7	1219.2	1236.45	P	P
260004_at	AT1G67860	12	4	4	4	NC	NC	NC	NC		NC	I	NC	NC	260004_at	2426.8	2550	2488.4	P	P	0.001221	0.001221	2427.3	2381.3	2404.3	P	P	0.00415	0.001221	0.2	0	0.2	-0.1	0.075	0.15	NC	NC	NC	NC	4	0.2	0	NC	NC	2345.8	2370.9	2358.35	P	P
260012_at	AT1G67865	12	4	4	4	I	NC	NC		NC	NC		NC	NC	260012_at	771.7	965.6	868.65	P	P	0.008057	0.008057	1705.6	1297.6	1501.6	P	P	0.00415	0.00293	1	0.7	0.6	0.5	0.7	0.216025	I	I	I	I	4	0.3	-0.3	NC	NC	1057.3	1045.2	1051.25	P	P
260007_at	AT1G67870	12	4	4	4	I	NC	NC		NC	NC			NC	260007_at	2799.6	2919.3	2859.45	P	P	0.000244	0.000244	3531.9	3450.9	3491.4	P	P	0.000244	0.000244	0.4	0.3	0.4	0.3	0.35	0.057735	I	I	I	I	4	0.1	-0.1	NC	NC	2543.1	2856.9	2700	P	P
260002_at	AT1G67940	12	4	4	4		NC	NC	D	NC	NC	NC	NC	NC	260002_at	1749.9	1508.2	1629.05	P	P	0.000244	0.000244	1345.1	1538.9	1442	P	P	0.000244	0.000244	-0.4	-0.2	-0.3	-0.1	-0.25	0.129099	D	NC	NC	NC	1	-0.1	0.1	NC	NC	1964.8	1635	1799.9	P	P
262274_at	AT1G68720	12	4	4	4		NC	NC	I	NC	NC	NC	NC	NC	262274_at	428.2	634	531.1	P	P	0.001953	0.00293	638.3	482	560.15	P	P	0.00293	0.000732	0.6	0.1	0.2	-0.4	0.125	0.411299	I	NC	NC	NC	1	0.5	-0.5	NC	NC	428.9	439.3	434.1	P	P
260041_at	AT1G68780	10	3	4	3	I	NC	NC		NC	NC		NC	NC	260041_at	282.6	245.6	264.1	P	A	0.046143	0.067627	488.6	360.7	424.65	P	P	0.01416	0.010742	0.8	1	0.4	0.5	0.675	0.275379	I	I	I	I	4	0	-0.4	NC	NC	282.2	320.9	301.55	P	P
260034_at	AT1G68810	12	4	4	4	I	NC	NC		NC	NC	NC	NC	NC	260034_at	218.8	226.5	222.65	P	P	0.00293	0.005859	448.1	357.7	402.9	P	P	0.000244	0.001221	1.1	1	0.8	0.7	0.9	0.182574	I	I	I	I	4	0.3	-0.2	NC	NC	231.7	245.2	238.45	P	P
260042_at	AT1G68820	12	4	4	4	NC	NC	NC	NC	NC	NC	I	NC	NC	260042_at	675.8	762.6	719.2	P	P	0.00293	0.00415	787.6	807.4	797.5	P	P	0.00293	0.00293	0.1	-0.2	0.1	-0.1	-0.025	0.15	NC	NC	NC	NC	4	0.2	0	NC	NC	610.4	681.5	645.95	P	P
260037_at	AT1G68840	9	4	3	2	D	NC	NC	D	NC	NC	D	NC	NC	260037_at	1537.9	1794.8	1666.35	P	P	0.001953	0.008057	724.6	729.5	727.05	P	P	0.046143	0.046143	-1.4	-1.2	-1.5	-1.4	-1.375	0.125831	D	D	D	D	4	-0.1	0	NC	NC	1444.9	1043.9	1244.4	P	P
257516_at	AT1G69040	12	4	4	4		NC	NC	I	NC	NC			NC	257516_at	761.6	929.5	845.55	P	P	0.000244	0.000244	947.9	993.6	970.75	P	P	0.000244	0.000244	0.5	0.2	0.4	0.1	0.3	0.182574	I	NC	NC	NC	1	0.2	0	NC	NC	616.4	621.5	618.95	P	P
259367_at	AT1G69070	12	4	4	4		NC	NC	I	NC	NC	NC	NC	NC	259367_at	638.2	701.8	670	P	P	0.000732	0.000732	943.8	809.9	876.85	P	P	0.000244	0.000732	0.3	0.4	0.2	0.2	0.275	0.0957427	I	NC	NC	NC	1	-0.2	-0.2	NC	NC	643.6	632.1	637.85	P	P
260343_at	AT1G69200	12	4	4	4	I	NC	NC	I		NC		NC	NC	260343_at	947	1013	980	P	P	0.000244	0.000244	1441	1200.5	1320.75	P	P	0.000244	0.000244	0.7	0.5	0.5	0.3	0.5	0.163299	I	I	I	I	4	0.2	-0.2	NC	NC	1036.6	1042	1039.3	P	P
260350_at	AT1G69410	12	4	4	4			NC			NC	I	NC	NC	260350_at	8158.7	7701.8	7930.25	P	P	0.000244	0.000244	6200.8	7609.3	6905.05	P	P	0.000244	0.000244	-0.3	-0.4	-0.1	-0.2	-0.25	0.129099	D	D	NC	NC	2	0	0.2	NC	I	8960.4	9126.4	9043.4	P	P
260347_at	AT1G69420	12	4	4	4	I	NC	NC	I	NC	NC		NC	NC	260347_at	830.6	912.2	871.4	P	P	0.000244	0.000244	1187.1	1190.9	1189	P	P	0.000244	0.000244	0.7	0.5	0.6	0.3	0.525	0.170783	I	I	I	I	4	0.2	-0.1	NC	NC	1046	841.8	943.9	P	P
256294_at	AT1G69450	12	4	4	4	NC	NC	NC	NC	NC	NC	I	NC	NC	256294_at	1138.9	1048.9	1093.9	P	P	0.000244	0.000244	1036.8	1057	1046.9	P	P	0.000244	0.000244	0	-0.1	-0.2	-0.3	-0.15	0.129099	NC	NC	NC	NC	4	0.1	-0.2	NC	NC	1120.8	1060.7	1090.75	P	P
256304_at	AT1G69523	12	4	4	4		NC	NC	NC	NC	NC	D	NC	NC	256304_at	163.9	281.9	222.9	P	P	0.030273	0.018555	408.5	373.7	391.1	P	P	0.000732	0.000732	1	0.5	1	0.5	0.75	0.288675	I	I	I	NC	3	0.5	-0.2	NC	NC	185.8	230.3	208.05	P	P
260371_at	AT1G69690	12	4	4	4	I	NC	NC		NC	NC	NC	NC	NC	260371_at	434	390.4	412.2	P	P	0.001953	0.000244	632.3	552.1	592.2	P	P	0.000244	0.000244	0.6	0.6	0.3	0.4	0.475	0.15	I	I	I	I	4	0	-0.2	NC	NC	421.5	313.4	367.45	P	P
260419_at	AT1G69730;AT1G69720	12	4	4	4			NC	NC	NC	NC	I	NC	NC	260419_at	759.9	765.5	762.7	P	P	0.001953	0.00293	728.8	656.5	692.65	P	P	0.000244	0.001953	0.6	0.8	-0.1	0.1	0.35	0.420317	I	I	NC	NC	2	-0.3	-0.6	NC	D	862.9	700.4	781.65	P	P
260417_at	AT1G69770	12	4	4	4		NC	NC	I	NC	NC	NC	NC	NC	260417_at	522.5	517.5	520	P	P	0.023926	0.023926	705.6	596.4	651	P	P	0.01416	0.008057	0.5	0.6	0.3	0.2	0.4	0.182574	I	I	NC	NC	2	-0.2	-0.3	NC	NC	452.6	610.9	531.75	P	P
260395_at	AT1G69780	12	4	4	4	I	NC	NC		NC	NC		NC	NC	260395_at	464.6	511.8	488.2	P	P	0.000244	0.000244	780.8	537.3	659.05	P	P	0.000244	0.000244	0.6	0.6	0.6	0.3	0.525	0.15	I	I	I	I	4	0	-0.2	NC	NC	503.7	437.2	470.45	P	P
260408_at	AT1G69880	12	4	4	4						NC	I	NC	NC	260408_at	1675.5	1283.8	1479.65	P	P	0.000244	0.000244	1942.5	1135.3	1538.9	P	P	0.000244	0.000244	0.1	0.4	-0.5	-0.2	-0.05	0.387298	NC	NC	D	NC	3	-0.3	-0.5	MD	D	3062.9	2386.3	2724.6	P	P
264748_at	AT1G70070	8	1	3	4	NC	NC	NC	I	NC	NC	NC	NC	NC	264748_at	422.7	378.6	400.65	A	M	0.095215	0.056152	458.1	494.1	476.1	A	P	0.067627	0.018555	0.2	0.5	0.2	0.1	0.25	0.173205	NC	NC	NC	NC	4	0.2	0.1	NC	NC	448.4	439.4	443.9	P	M
260362_at	AT1G70530	12	4	4	4	NC	NC	NC	I	NC	NC	NC	NC	NC	260362_at	1007.6	969.5	988.55	P	P	0.000244	0.000244	942.3	932.5	937.4	P	P	0.000244	0.000244	0.1	0.2	-0.1	-0.1	0.025	0.15	NC	NC	NC	NC	4	-0.1	-0.2	NC	NC	892.9	786.3	839.6	P	P
260308_at	AT1G70610	12	4	4	4		NC	NC	I	NC	NC	NC	NC	NC	260308_at	519.2	534	526.6	P	P	0.000244	0.000244	697.1	540.7	618.9	P	P	0.000244	0.000244	0.7	0.5	0.3	0.1	0.4	0.258199	I	I	NC	NC	2	0.2	-0.4	NC	NC	448.6	515.2	481.9	P	P
260205_at	AT1G70700	12	4	4	4		NC	NC			NC	I	NC	NC	260205_at	1322.4	1645.2	1483.8	P	P	0.00293	0.001953	1605.7	1225.7	1415.7	P	P	0.001953	0.001221	0.2	0	-0.1	-0.3	-0.05	0.208167	NC	NC	NC	D	3	0.2	-0.3	NC	NC	1334.2	1114.7	1224.45	P	P
260181_at	AT1G70710	12	4	4	4	I	NC	NC	NC		NC		NC	NC	260181_at	1176.2	1103.3	1139.75	P	P	0.001221	0.001953	1531.7	1253	1392.35	P	P	0.001953	0.000244	0.4	0.4	0.4	0.5	0.425	0.05	I	I	I	I	4	-0.1	0.1	NC	NC	778.4	770.7	774.55	P	P
262314_at	AT1G70810	12	4	4	4	D		NC	D		NC	I	NC	NC	262314_at	1413.1	1469.5	1441.3	P	P	0.000732	0.000732	766.9	1184	975.45	P	P	0.005859	0.000732	-1.1	-1.1	-0.5	-0.5	-0.8	0.34641	D	D	D	D	4	0	0.6	NC	I	1963.8	2768	2365.9	P	P
262304_at	AT1G70890	12	4	4	4			NC	D	NC	NC	NC	NC	NC	262304_at	1886.4	1695.1	1790.75	P	P	0.000732	0.000732	1187	1443.3	1315.15	P	P	0.000732	0.000732	-0.5	-0.4	-0.3	-0.1	-0.325	0.170783	D	D	NC	NC	2	-0.1	0.3	NC	I	1853.8	1637.8	1745.8	P	P
262308_at	AT1G71010	12	4	4	4		NC	NC	I	NC	NC	NC	NC	NC	262308_at	1556.1	1854.7	1705.4	P	P	0.000244	0.000244	1937.5	2140.3	2038.9	P	P	0.000244	0.000244	0.4	0.3	0.4	0.2	0.325	0.0957427	I	NC	I	NC	2	0.2	0	NC	NC	1450.7	1617.6	1534.15	P	P
259751_at	AT1G71030	12	4	4	4			NC		NC	NC	D	NC	NC	259751_at	1348.9	1201.4	1275.15	P	P	0.000732	0.000732	1209.7	689.1	949.4	P	P	0.000732	0.001221	0	0.1	-0.9	-0.8	-0.4	0.522813	NC	NC	D	D	2	-0.1	-0.8	NC	D	1564.8	1259.3	1412.05	P	P
259752_at	AT1G71040	12	4	4	4	D	NC	NC		NC	NC	NC	NC	NC	259752_at	2827.7	2815.8	2821.75	P	P	0.000244	0.000244	2011.3	2374.5	2192.9	P	P	0.000244	0.000244	-0.5	-0.5	-0.5	-0.4	-0.475	0.05	D	D	D	D	4	0	0	NC	NC	2593.9	3198.1	2896	P	P
261522_at	AT1G71710	12	4	4	4		NC	NC	I	NC	NC		NC	NC	261522_at	696.9	596.3	646.6	P	P	0.00415	0.000244	943.4	810.6	877	P	P	0.000244	0.000732	0.6	0.5	0.3	0.3	0.425	0.15	I	I	I	NC	3	0.1	-0.1	NC	NC	613.1	580.3	596.7	P	P
261507_at	AT1G71720	12	4	4	4		NC	NC	I	NC	NC	NC	NC	NC	261507_at	1196.9	1394.4	1295.65	P	P	0.008057	0.005859	1717.8	1398.5	1558.15	P	P	0.005859	0.00415	0.6	0.3	0.4	0	0.325	0.25	I	NC	NC	NC	1	0.3	-0.3	NC	NC	1116.7	1150.6	1133.65	P	P
256342_at	AT1G72020	12	4	4	4			NC	D	NC	NC	NC	NC	NC	256342_at	15093.4	13789.6	14441.5	P	P	0.000244	0.000244	11093.8	13057	12075.4	P	P	0.000244	0.000244	-0.4	-0.3	-0.2	0	-0.225	0.170783	D	D	NC	NC	2	-0.1	0.3	NC	I	14976.7	14280.8	14628.8	P	P
256341_at	AT1G72040	12	4	4	4		NC	NC	I	NC	NC		NC	NC	256341_at	623.4	690.4	656.9	P	P	0.005859	0.001953	1040.4	625.9	833.15	P	P	0.00293	0.000244	0.8	0.5	0.5	0.2	0.5	0.244949	I	I	I	NC	3	0.3	-0.2	NC	NC	356.8	526.3	441.55	P	P
256344_at	AT1G72050	12	4	4	4		NC	NC	I	NC	NC		NC	NC	256344_at	936.5	1205.6	1071.05	P	P	0.008057	0.008057	1533.3	1241.3	1387.3	P	P	0.008057	0.001221	0.6	0.4	0.4	0.1	0.375	0.206155	I	I	NC	NC	2	0.2	-0.4	NC	NC	1212.2	918.4	1065.3	P	P
256343_at	AT1G72090	12	4	4	4		NC	NC	I	NC	NC	NC	NC	NC	256343_at	1063.5	1105.8	1084.65	P	P	0.00293	0.001953	1522.3	817.8	1170.05	P	P	0.001953	0.000732	0.5	0.3	0.2	0.1	0.275	0.170783	I	MI	NC	NC	1	0	-0.4	NC	NC	1057.8	872.1	964.95	P	P
259803_at	AT1G72150	12	4	4	4		NC	NC		NC	NC	D	NC	NC	259803_at	4081	3761.6	3921.3	P	P	0.000244	0.000244	4952.1	4425.8	4688.95	P	P	0.000244	0.000244	0.3	0.4	0.1	0.2	0.25	0.129099	I	I	NC	NC	2	-0.1	-0.2	NC	NC	3859.3	3655.6	3757.45	P	P
259802_at	AT1G72260	5	2	2	1			NC	I	NC	NC	NC	NC	NC	259802_at	99.7	96.6	98.15	A	A	0.067627	0.171387	262.1	145.8	203.95	P	P	0.01416	0.010742	0.9	1.4	0.3	0.8	0.85	0.450925	NC	I	NC	NC	3	-0.1	-0.7	NC	D	54.4	110.3	82.35	A	M
260427_at	AT1G72430	12	4	4	4	D	NC	NC		NC	NC		NC	NC	260427_at	5296.3	4709.2	5002.75	P	P	0.000244	0.000244	3545.5	3774	3659.75	P	P	0.000244	0.000244	-0.5	-0.4	-0.5	-0.3	-0.425	0.0957427	D	D	D	D	4	-0.2	0.1	NC	NC	4679.8	4465.5	4572.65	P	P
259892_at	AT1G72610	12	4	4	4	NC	NC	NC			NC	D	NC	NC	259892_at	30028.6	26586.1	28307.3	P	P	0.000244	0.000244	27540.5	27510.6	27525.5	P	P	0.000244	0.000244	-0.1	0.1	0	0.1	0.025	0.0957427	NC	NC	NC	NC	4	-0.1	0	NC	NC	29740	27036.1	28388	P	P
262381_at	AT1G72900	12	4	4	4	D	NC	NC	D		NC	I		NC	262381_at	1242.4	1108.4	1175.4	P	P	0.000244	0.000244	550.3	821.3	685.8	P	P	0.000244	0.001221	-0.9	-1	-0.9	-0.6	-0.85	0.173205	D	D	D	D	4	-0.2	0.3	NC	NC	1399.4	1273.9	1336.65	P	P
262374_s_at	AT1G72910;AT1G72930	12	4	4	4	D	NC		D	NC	NC	I	NC	NC	262374_s_at	12704.4	10199.2	11451.8	P	P	0.000244	0.000244	6732.6	8193.9	7463.25	P	P	0.000244	0.000244	-0.9	-0.6	-0.7	-0.3	-0.625	0.25	D	D	D	D	4	-0.4	0.3	D	NC	12483.2	10835.6	11659.4	P	P
262382_at	AT1G72920	12	4	4	4	D	NC	NC	D		NC		NC	NC	262382_at	727.2	586.4	656.8	P	P	0.000244	0.000244	374.1	321.4	347.75	P	P	0.000732	0.000244	-1.1	-0.8	-1.1	-0.9	-0.975	0.15	D	D	D	D	4	-0.2	-0.1	NC	NC	931.5	810.1	870.8	P	P
262376_at	AT1G72970	12	4	4	4	I	NC	NC	I	NC	NC	D	NC	NC	262376_at	940.7	1086	1013.35	P	P	0.000244	0.000732	1593.9	1404.3	1499.1	P	P	0.000244	0.000244	0.8	0.7	0.5	0.5	0.625	0.15	I	I	I	I	4	0	-0.1	NC	NC	1104.4	1125.3	1114.85	P	P
262369_at	AT1G73010	12	4	4	4		NC	NC	D	NC	NC				262369_at	682.7	739.4	711.05	P	P	0.000244	0.000244	533.3	577.8	555.55	P	P	0.000244	0.000244	-0.4	-0.6	-0.3	-0.4	-0.425	0.125831	NC	D	NC	D	2	0.2	0.1	NC	NC	689.1	774.5	731.8	P	P
262377_at	AT1G73110	12	4	4	4	NC	NC	NC	I	NC	NC	NC	NC	NC	262377_at	1175.1	1311.6	1243.35	P	P	0.010742	0.008057	1494.3	1241.3	1367.8	P	P	0.01416	0.010742	0.3	0	0.1	-0.2	0.05	0.208167	NC	NC	NC	NC	4	0.3	-0.2	NC	NC	1333.9	1221.1	1277.5	P	P
262373_at	AT1G73120	12	4	4	4	D			NC	NC	NC	D	NC	NC	262373_at	1319.4	1817.5	1568.45	P	P	0.001221	0.001953	364.6	552	458.3	P	P	0.037598	0.010742	-1.6	-2.2	-1.3	-1.9	-1.75	0.387298	D	D	D	D	4	0.6	0.4	I	I	1272.9	1584.6	1428.75	P	P
260089_at	AT1G73170	12	4	4	4		NC	NC	I	NC	NC	NC	NC	NC	260089_at	1240.2	1579.5	1409.85	P	P	0.000244	0.000244	1520.2	1566.2	1543.2	P	P	0.000244	0.000244	0.4	0.1	0.4	0.2	0.275	0.15	I	NC	I	NC	2	0.3	0	NC	NC	1140.6	1122.5	1131.55	P	P
260099_at	AT1G73180	12	4	4	4	NC	NC	NC	I	NC	NC	NC	NC	NC	260099_at	985.4	999.8	992.6	P	P	0.000732	0.000732	898.5	1229.8	1064.15	P	P	0.000244	0.000732	0.2	0.1	0.2	0.2	0.175	0.05	NC	NC	NC	NC	4	0.1	0	NC	NC	919	923.5	921.25	P	P
245721_s_at	AT1G73460;AT1G73450	12	4	4	4		NC	NC	I	NC	NC	NC	NC	NC	245721_s_at	435	543.9	489.45	P	P	0.000244	0.000732	543.9	666.5	605.2	P	P	0.000244	0.000244	0.7	0.1	0.6	0.3	0.425	0.275379	I	NC	NC	NC	1	0.3	0.2	NC	NC	458.7	503.9	481.3	P	P
245731_at	AT1G73500	12	4	4	4	D	NC	NC	D	NC	NC	NC	NC	NC	245731_at	2943.2	2165.6	2554.4	P	P	0.00293	0.001221	896.8	1358.1	1127.45	P	P	0.008057	0.00293	-1.4	-1.2	-1	-0.9	-1.125	0.221736	D	D	D	D	4	-0.2	0.2	NC	NC	2639	2686.1	2662.55	P	P
259842_at	AT1G73600	12	4	4	4	I	NC	NC			NC	D	NC	NC	259842_at	6853.7	6636.3	6745	P	P	0.000244	0.000244	11300.1	9036.8	10168.5	P	P	0.000244	0.000244	0.7	0.7	0.5	0.5	0.6	0.11547	I	I	I	I	4	0	-0.2	NC	NC	6995.7	6963.1	6979.4	P	P
260374_at	AT1G73960	12	4	4	4			NC	I	NC	NC		NC	NC	260374_at	1172	983.3	1077.65	P	P	0.000244	0.000244	1173.8	994.4	1084.1	P	P	0.000244	0.000244	0.2	0.3	-0.2	-0.1	0.05	0.238048	NC	I	NC	NC	3	-0.1	-0.3	NC	D	833.1	914.2	873.65	P	P
260391_at	AT1G74020	12	4	4	4			NC	D	NC	NC		NC	NC	260391_at	4251.9	3498.9	3875.4	P	P	0.000732	0.001221	2858.3	3810.8	3334.55	P	P	0.001221	0.001221	-0.6	-0.4	-0.2	-0.1	-0.325	0.221736	D	D	NC	NC	2	-0.1	0.3	NC	I	3524.7	4378	3951.35	P	P
260250_at	AT1G74260	12	4	4	4		NC		I	NC	NC	NC	NC	NC	260250_at	1874.9	2007.9	1941.4	P	P	0.000732	0.000244	2556.4	2275.2	2415.8	P	P	0.000244	0.000244	0.5	0.3	0.4	0.2	0.35	0.129099	I	NC	I	NC	2	0.2	-0.1	I	NC	1891.6	1677.9	1784.75	P	P
260236_at	AT1G74470	12	4	4	4		NC	NC		NC	NC	D	NC	NC	260236_at	18154.4	17819.8	17987.1	P	P	0.000244	0.000244	22294.8	17548.6	19921.7	P	P	0.000244	0.000244	0.3	0.2	0.1	0	0.15	0.129099	I	I	NC	NC	2	0.1	-0.2	NC	NC	16879.4	19569.3	18224.3	P	P
260235_at	AT1G74560	12	4	4	4	I	NC	NC	I	NC	NC	NC		NC	260235_at	1943.8	2415.8	2179.8	P	P	0.000244	0.000244	3531.5	2779.6	3155.55	P	P	0.000244	0.000244	0.7	0.5	0.5	0.2	0.475	0.206155	I	I	I	I	4	0.3	-0.3	NC	NC	2455.9	2000.1	2228	P	P
262210_at	AT1G74690	12	4	4	4		NC	NC	I	NC	NC	NC	NC	NC	262210_at	1178.9	1341.4	1260.15	P	P	0.000244	0.000244	1669.6	1530.7	1600.15	P	P	0.000244	0.000244	0.6	0.3	0.4	0.3	0.4	0.141421	I	NC	I	NC	2	0.2	-0.1	NC	NC	1022.3	1129.8	1076.05	P	P
262207_at	AT1G74850	12	4	4	4		NC		I	NC	NC	NC	NC	NC	262207_at	744.6	908.9	826.75	P	P	0.010742	0.001953	893.3	1038.6	965.95	P	P	0.000732	0.001953	0.4	0.3	0.4	0.1	0.3	0.141421	I	NC	I	NC	2	0.4	-0.2	I	NC	792.3	820.3	806.3	P	P
259987_at	AT1G75030	12	4	4	4	NC	NC	NC	NC	NC	NC	D	NC	NC	259987_at	225.8	306	265.9	P	P	0.001221	0.00293	315.7	363.5	339.6	P	P	0.000732	0.000732	0	0.1	0.3	0.2	0.15	0.129099	NC	NC	NC	NC	4	0.1	0	NC	NC	263.4	259.1	261.25	P	P
259927_at	AT1G75100	12	4	4	4			NC	I	NC	NC		NC	NC	259927_at	837.3	742.8	790.05	P	P	0.001221	0.000244	1108.8	582.5	845.65	P	P	0.000244	0.000732	0.8	0.6	-0.2	-0.5	0.175	0.623832	I	I	NC	NC	2	0.3	-0.9	NC	D	950.6	850.3	900.45	P	P
256453_at	AT1G75270	12	4	4	4			NC	D	NC	NC		NC		256453_at	4003.8	3911.2	3957.5	P	P	0.000244	0.000244	3265.9	3953	3609.45	P	P	0.000244	0.000244	-0.3	-0.2	0	0	-0.125	0.15	NC	D	NC	NC	3	0	0.2	NC	I	3875.5	4108.2	3991.85	P	P
262970_at	AT1G75690	12	4	4	4	NC	NC	NC	NC	NC	NC	D	NC	NC	262970_at	9260.7	8869.3	9065	P	P	0.000244	0.000244	8488.3	7937.5	8212.9	P	P	0.000244	0.000244	0	-0.1	-0.1	-0.2	-0.1	0.0816497	NC	NC	NC	NC	4	0.1	-0.1	NC	NC	9769.8	8672.8	9221.3	P	P
262947_at	AT1G75750	12	4	4	4			NC	D	NC	NC	I	NC	NC	262947_at	21891.8	18531.8	20211.8	P	P	0.000244	0.000244	7736.7	15228	11482.4	P	P	0.000244	0.000244	-1.3	-1.1	-0.5	-0.2	-0.775	0.512348	D	D	D	NC	3	-0.2	0.9	NC	I	19026.9	19261.8	19144.3	P	P
262728_at	AT1G75820	12	4	4	4		NC	NC	I	NC	NC		NC	NC	262728_at	1188.3	1645.6	1416.95	P	P	0.001953	0.001953	2606.8	1714.8	2160.8	P	P	0.001953	0.001953	0.6	0.4	0.5	0.1	0.4	0.216025	I	I	I	NC	3	0.3	-0.3	NC	NC	1039.9	905.5	972.7	P	P
262700_at	AT1G76020	12	4	4	4	NC	NC	NC	D	NC	NC		NC	NC	262700_at	1018.3	908.8	963.55	P	P	0.000732	0.000732	819.8	864.3	842.05	P	P	0.000732	0.000732	-0.2	-0.1	-0.2	0	-0.125	0.0957427	NC	NC	NC	NC	4	0	0	NC	NC	1173.5	1055.7	1114.6	P	P
261782_at	AT1G76110	11	3	4	4		NC		I	NC	NC	NC	NC	NC	261782_at	338.1	495.6	416.85	A	P	0.067627	0.01416	827.7	533.7	680.7	P	P	0.01416	0.023926	1	0.5	0.6	0.2	0.575	0.330404	I	NC	I	NC	2	0.4	-0.4	I	NC	540.4	446.3	493.35	P	P
259979_at	AT1G76600	12	4	4	4	D	NC	NC			NC		NC	NC	259979_at	1317.3	1368.9	1343.1	P	P	0.00415	0.005859	977.8	632.2	805	P	P	0.018555	0.010742	-0.5	-0.5	-0.8	-0.9	-0.675	0.206155	D	D	D	D	4	0	-0.3	NC	NC	1371.7	1466	1418.85	P	P
259879_at	AT1G76650	12	4	4	4			NC	D	NC	NC	NC	NC	NC	259879_at	468.2	413.6	440.9	P	P	0.000244	0.000732	156.7	336.2	246.45	P	P	0.010742	0.000244	-1	-0.8	-0.2	-0.1	-0.525	0.442531	D	D	NC	NC	2	-0.1	0.7	NC	I	309	399.2	354.1	P	P
259878_at	AT1G76790	12	4	4	4		NC				NC	I	NC	NC	259878_at	3562.2	4617.7	4089.95	P	P	0.000244	0.000244	3465.3	3535.9	3500.6	P	P	0.000244	0.000244	0	-0.3	0	-0.3	-0.15	0.173205	NC	D	NC	NC	3	0.3	0	I	NC	4009.7	3339	3674.35	P	P
259872_at	AT1G76810	12	4	4	4		NC	NC	I	NC	NC	NC	NC	NC	259872_at	821.5	890.8	856.15	P	P	0.000244	0.000244	1078.7	965	1021.85	P	P	0.000244	0.000244	0.4	0.2	0.3	0.1	0.25	0.129099	I	NC	NC	NC	1	0.2	-0.2	NC	NC	763.1	892	827.55	P	P
246384_at	AT1G77370	12	4	4	4		NC				NC	I	NC	NC	246384_at	3817.5	3264.7	3541.1	P	P	0.000244	0.000244	2789.8	3456.5	3123.15	P	P	0.000244	0.000244	-0.5	-0.2	-0.3	0.1	-0.225	0.25	D	NC	NC	NC	1	-0.3	0.2	MD	NC	3975.2	4141.5	4058.35	P	P
259707_at	AT1G77490	12	4	4	4	I	NC	NC		NC	NC	D	NC	NC	259707_at	1547.5	1645.3	1596.4	P	P	0.000244	0.000244	2179.6	2144.1	2161.85	P	P	0.000244	0.000244	0.5	0.4	0.3	0.3	0.375	0.0957427	I	I	I	I	4	0	-0.1	NC	NC	1751.8	1684.2	1718	P	P
259760_at	AT1G77580	7	2	2	3		NC	NC	I	NC	NC	NC	NC	NC	259760_at	241.1	167.2	204.15	A	M	0.095215	0.056152	344.4	278.6	311.5	P	P	0.030273	0.008057	0.6	0.6	0.2	0.4	0.45	0.191485	I	NC	MI	NC	1	0	-0.2	NC	NC	213.7	157	185.35	A	A
262133_at	AT1G78000	12	4	4	4	I	NC	NC		NC	NC		NC		262133_at	3928.9	4263.6	4096.25	P	P	0.000244	0.000244	5389	6574.3	5981.65	P	P	0.000244	0.000244	0.5	0.4	0.7	0.6	0.55	0.129099	I	I	I	I	4	0.1	0.2	NC	NC	3365.7	3962.7	3664.2	P	P
262162_at	AT1G78020	12	4	4	4			NC	D	NC	NC		NC	NC	262162_at	3880.7	3639.8	3760.25	P	P	0.000244	0.000244	4135.9	5660.3	4898.1	P	P	0.000244	0.000244	0.1	0.2	0.6	0.6	0.375	0.262996	NC	NC	I	I	2	0	0.5	NC	I	4337.3	4281.6	4309.45	P	P
260803_at	AT1G78340	12	4	4	4	I	NC	NC		NC	NC		NC		260803_at	626.3	684.9	655.6	P	P	0.000244	0.000244	891.4	956.7	924.05	P	P	0.000244	0.000244	0.6	0.4	0.8	0.7	0.625	0.170783	I	I	I	I	4	0.1	0.1	NC	NC	670.5	418.7	544.6	P	P
263126_at	AT1G78460	12	4	4	4	D	NC	NC		NC	NC	NC	NC	NC	263126_at	5433.5	4694.4	5063.95	P	P	0.000244	0.000244	3517.1	3624.8	3570.95	P	P	0.000244	0.000244	-0.7	-0.4	-0.5	-0.4	-0.5	0.141421	D	D	D	D	4	-0.2	0	NC	NC	3907.2	4747.8	4327.5	P	P
263131_at	AT1G78630	12	4	4	4	NC	NC	NC	I		NC	D	NC	NC	263131_at	8531.5	9245.3	8888.4	P	P	0.000244	0.000244	10728.1	9636.8	10182.5	P	P	0.000244	0.000244	0.2	0.1	0.2	0	0.125	0.0957427	NC	NC	NC	NC	4	0.1	0	NC	NC	8781.5	8629	8705.25	P	P
263130_at	AT1G78650	12	4	4	4		NC	NC	I	NC	NC	NC	NC	NC	263130_at	468	450.1	459.05	P	P	0.001953	0.00293	645.7	472.1	558.9	P	P	0.001953	0.001221	0.5	0.3	0.2	0	0.25	0.208167	I	NC	NC	NC	1	0.2	-0.2	NC	NC	374.9	364.6	369.75	P	P
264279_s_at	AT1G78820	12	4	4	4	D	NC		D	NC	NC	D	NC	NC	264279_s_at	15882	12759.3	14320.6	P	P	0.000244	0.000244	7862.4	7978.2	7920.3	P	P	0.000244	0.000244	-0.9	-0.6	-0.8	-0.5	-0.7	0.182574	D	D	D	D	4	-0.3	0.1	D	NC	14351	11556.1	12953.5	P	P
264299_s_at	AT1G78860	12	4	4	4		NC		D	NC	NC		NC	NC	264299_s_at	13743.7	11147.1	12445.4	P	P	0.000244	0.000244	9568.5	12098.5	10833.5	P	P	0.000244	0.000244	-0.6	-0.2	-0.5	-0.1	-0.35	0.238048	D	NC	D	NC	2	-0.3	0.1	D	NC	12920	14455.1	13687.5	P	P
264126_at	AT1G79270;AT1G79280	12	4	4	4		NC	NC	I	NC	NC	NC	NC	NC	264126_at	782.1	850.9	816.5	P	P	0.001953	0.00415	1049	883.5	966.25	P	P	0.001953	0.001953	0.4	0.4	0.2	0.1	0.275	0.15	I	I	NC	NC	2	0.1	-0.2	NC	NC	624.8	833.1	728.95	P	P
262921_at	AT1G79430	12	4	4	4		NC	NC	I	NC	NC	NC	NC	NC	262921_at	342.5	496.6	419.55	P	P	0.005859	0.005859	544.4	552.5	548.45	P	P	0.001953	0.000732	0.8	0.3	0.6	0	0.425	0.35	I	NC	I	NC	2	0.5	-0.1	NC	NC	421.8	342.9	382.35	P	P
262937_at	AT1G79560	12	4	4	4		NC	NC	I	NC	NC	NC	NC	NC	262937_at	1403.3	1577.8	1490.55	P	P	0.000244	0.000244	1850	1653.6	1751.8	P	P	0.000244	0.000244	0.3	0.1	0.3	0.1	0.2	0.11547	I	NC	I	NC	2	0.3	-0.1	NC	NC	1358.9	1659.6	1509.25	P	P
261351_at	AT1G79790	12	4	4	4	NC	NC	NC	NC	NC	NC	D	NC	NC	261351_at	1549.7	1692.1	1620.9	P	P	0.000244	0.000244	1353.3	1311.5	1332.4	P	P	0.000244	0.000244	-0.2	-0.1	-0.3	-0.2	-0.2	0.0816497	NC	NC	NC	NC	4	0	-0.1	NC	NC	1600.1	1354.3	1477.2	P	P
262047_at	AT1G80160	10	4	4	2			NC			NC	I	NC	NC	262047_at	617.5	632.4	624.95	P	P	0.030273	0.010742	579.6	359.3	469.45	P	P	0.005859	0.018555	0	-0.1	-0.7	-0.9	-0.425	0.442531	NC	NC	D	MD	2	0.1	-0.7	NC	D	678.3	710.9	694.6	P	P
260297_at	AT1G80280	12	4	4	4	I	NC	NC		NC	NC	NC	NC	NC	260297_at	598.7	728.8	663.75	P	P	0.001221	0.001221	915.3	795.8	855.55	P	P	0.000244	0.000244	0.7	0.5	0.6	0.4	0.55	0.129099	I	I	I	I	4	0.2	-0.2	NC	NC	596.6	670.4	633.5	P	P
260302_at	AT1G80310	12	4	4	4		NC	NC	D	NC	NC		NC	NC	260302_at	2350.1	2082	2216.05	P	P	0.000244	0.000244	1585.2	1979.4	1782.3	P	P	0.001221	0.000732	-0.8	-0.7	-0.3	-0.2	-0.5	0.294392	D	D	D	NC	3	-0.3	0.3	NC	NC	2196.7	2416.8	2306.75	P	P
260287_at	AT1G80440	12	4	4	4	D		NC	D	NC	NC	D	NC		260287_at	2471	2425.5	2448.25	P	P	0.000244	0.000732	890.6	721.4	806	P	P	0.000244	0.000244	-1.2	-1.1	-1.7	-1.6	-1.4	0.294392	D	D	D	D	4	-0.1	-0.6	NC	D	1973.6	1761.2	1867.4	P	P
260283_at	AT1G80480	12	4	4	4	NC	NC	NC	I	NC	NC	NC	NC	NC	260283_at	3368	3161.9	3264.95	P	P	0.000244	0.000244	2943.1	3457.4	3200.25	P	P	0.000244	0.000244	0.1	-0.1	0.2	0.2	0.1	0.141421	NC	NC	NC	NC	4	0.1	0.2	NC	NC	2775.1	3279.3	3027.2	P	P
259861_at	AT1G80620	12	4	4	4		NC	NC	I	NC	NC	NC	NC	NC	259861_at	765.5	997.2	881.35	P	P	0.000244	0.000244	1283.7	912.6	1098.15	P	P	0.001221	0.000244	0.4	0.2	0.3	0	0.225	0.170783	I	NC	NC	NC	1	0.1	-0.2	NC	NC	824.7	970.3	897.5	P	P
261882_at	AT1G80770	12	4	4	4			NC	I	NC	NC		NC	NC	261882_at	1040.3	1241.8	1141.05	P	P	0.00293	0.00415	1215.3	966	1090.65	P	P	0.001953	0.001221	0.4	0.1	0	-0.3	0.05	0.288675	I	NC	NC	NC	1	0.2	-0.3	NC	MD	839.7	827.7	833.7	P	P
261895_at	AT1G80830	12	4	4	4	NC	NC	NC	NC		NC	I	NC	NC	261895_at	3908.1	3385.4	3646.75	P	P	0.000244	0.000244	3830.3	4012.4	3921.35	P	P	0.000244	0.000244	0.1	0.2	0.1	0.1	0.125	0.05	NC	NC	NC	NC	4	-0.1	0	NC	NC	3350.7	3862.9	3606.8	P	P
261885_at	AT1G80930	12	4	4	4	NC	NC	NC	I	NC	NC	NC	NC	NC	261885_at	1343.3	1208.5	1275.9	P	P	0.000244	0.000244	1537.2	1506.1	1521.65	P	P	0.000244	0.000244	0.1	0.2	0.1	0.2	0.15	0.057735	NC	NC	NC	NC	4	-0.1	0	NC	NC	1283.2	1360.5	1321.85	P	P
262204_at	AT2G01100	12	4	4	4		NC		I	NC	NC	NC	NC	NC	262204_at	740.6	981.7	861.15	P	P	0.001221	0.000732	1166.2	1060.1	1113.15	P	P	0.000244	0.000244	0.8	0.4	0.4	0.1	0.425	0.287228	I	I	I	NC	3	0.4	-0.2	I	NC	700.7	830.1	765.4	P	P
265735_at	AT2G01140	12	4	4	4			NC	D	NC	NC		NC	NC	265735_at	8809.7	7547	8178.35	P	P	0.000244	0.000244	5860.2	7039.1	6449.65	P	P	0.000244	0.000244	-0.7	-0.5	-0.3	-0.1	-0.4	0.258199	D	D	D	NC	3	-0.2	0.3	NC	I	7573.9	8789.7	8181.8	P	P
266353_at	AT2G01520	12	4	4	4	D	NC	NC							266353_at	9360.8	11246	10303.4	P	P	0.000244	0.000244	6686.6	7467.1	7076.85	P	P	0.000244	0.000244	-0.3	-0.5	-0.3	-0.5	-0.4	0.11547	D	D	D	D	4	0.1	0	NC	NC	7773.3	5997	6885.15	P	P
266352_at	AT2G01610	12	4	4	4	I	NC	NC			NC		NC	NC	266352_at	726.4	617	671.7	P	P	0.000732	0.000732	1062.7	1165.9	1114.3	P	P	0.000244	0.000732	0.5	0.6	0.5	0.6	0.55	0.057735	I	I	I	I	4	0	0.1	NC	NC	624.4	585.1	604.75	P	P
263598_at	AT2G01850	12	4	4	4	D	NC	NC	NC	NC	NC	NC	NC	NC	263598_at	4257.1	5120.5	4688.8	P	P	0.000244	0.000244	3406.8	3378.7	3392.75	P	P	0.000244	0.000244	-0.3	-0.5	-0.4	-0.6	-0.45	0.129099	D	D	D	D	4	0.1	-0.1	NC	NC	4877.7	3547.2	4212.45	P	P
263595_at	AT2G01890	12	4	4	4	NC	NC	NC		NC	NC	I	NC	NC	263595_at	1371.2	1600.7	1485.95	P	P	0.000244	0.000244	1516.3	1825	1670.65	P	P	0.000244	0.000244	0.2	0.1	0.2	0	0.125	0.0957427	NC	NC	NC	NC	4	0.2	-0.1	NC	NC	1341.5	1212.6	1277.05	P	P
266181_at	AT2G02390	12	4	4	4		NC	NC	D	NC	NC		NC	NC	266181_at	2737.9	2867.5	2802.7	P	P	0.000244	0.000244	2185.5	2610.3	2397.9	P	P	0.000244	0.000244	-0.3	-0.4	0	-0.1	-0.2	0.182574	NC	D	NC	NC	3	0.1	0.3	NC	NC	3211.6	3262.3	3236.95	P	P
266743_at	AT2G02990	8	4	2	2	D		NC	D	NC	NC	I	NC	NC	266743_at	657.3	737.9	697.6	P	P	0.001953	0.001953	310.8	433.6	372.2	P	P	0.046143	0.005859	-1	-1.1	-0.5	-0.9	-0.875	0.262996	D	D	D	D	4	0.2	0.3	NC	MI	779	921.2	850.1	P	P
266770_at	AT2G03090	12	4	4	4	I	NC	NC		NC	NC	NC	NC	NC	266770_at	1420.9	1755.5	1588.2	P	P	0.000244	0.000732	1948.3	1914.6	1931.45	P	P	0.000244	0.000244	0.8	0.3	0.8	0.3	0.55	0.288675	I	I	I	I	4	0.3	-0.1	NC	NC	1370.6	1197.6	1284.1	P	P
266727_at	AT2G03150	12	4	4	4		NC	NC	I	NC	NC	NC	NC	NC	266727_at	437	352.2	394.6	P	P	0.000732	0.000244	624.5	645.9	635.2	P	P	0.000244	0.000244	0.4	0.7	0.3	0.6	0.5	0.182574	I	I	NC	NC	2	-0.2	-0.2	NC	NC	459.6	344.1	401.85	P	P
265707_at	AT2G03390	12	4	4	4	NC	NC	NC	I	NC	NC	NC	NC	NC	265707_at	2113	2259.7	2186.35	P	P	0.000244	0.000244	2390	2179.3	2284.65	P	P	0.000244	0.000244	0.3	0.1	0.2	0	0.15	0.129099	NC	NC	NC	NC	4	0.3	-0.1	NC	NC	2488.2	1960.6	2224.4	P	P
264037_at	AT2G03750	12	4	4	4		NC					D	NC	NC	264037_at	1466.2	1691.4	1578.8	P	P	0.000244	0.000244	2162.4	1770.2	1966.3	P	P	0.000244	0.000244	0.6	0.3	0.4	0	0.325	0.25	I	NC	I	NC	2	0.3	-0.3	I	NC	1614.1	1230.9	1422.5	P	P
263405_s_at	AT2G04080;AT2G04066	12	4	4	4	NC	NC	NC	NC	NC	NC	I	NC	NC	263405_s_at	665.4	625.1	645.25	P	P	0.001953	0.00415	806.7	668.8	737.75	P	P	0.001953	0.000244	-0.1	0.2	-0.3	-0.1	-0.075	0.206155	NC	NC	NC	NC	4	-0.1	-0.3	NC	NC	585.5	857.9	721.7	P	P
263404_s_at	AT2G04100	12	4	4	4	NC	NC	NC			NC	I	NC	NC	263404_s_at	673.6	592.1	632.85	P	P	0.000244	0.000244	668.9	678.8	673.85	P	P	0.001953	0.000732	0	0.3	0.1	0.2	0.15	0.129099	NC	NC	NC	NC	4	-0.2	-0.3	NC	NC	751.8	752.2	752	P	P
263406_at	AT2G04160	12	4	4	4			NC	D	NC	NC	NC	NC	NC	263406_at	2042	2445.2	2243.6	P	P	0.000732	0.000732	1454.1	1542.1	1498.1	P	P	0.000732	0.000732	-0.6	-0.7	-0.2	-0.2	-0.425	0.262996	D	D	NC	NC	2	0	0.5	NC	I	1997.9	2747	2372.45	P	P
263325_at	AT2G04240	12	4	4	4	NC	NC	NC	NC	NC	NC	I	NC	NC	263325_at	1436	1285.8	1360.9	P	P	0.005859	0.005859	1383.3	1411.3	1397.3	P	P	0.010742	0.00415	-0.1	0.1	-0.1	0.1	0	0.11547	NC	NC	NC	NC	4	-0.1	0.1	NC	NC	1519.5	1253.1	1386.3	P	P
265377_at	AT2G05790	12	4	4	4	I	NC	NC	I	NC	NC		NC	NC	265377_at	4739.8	4755.3	4747.55	P	P	0.000244	0.000244	6459	5768.1	6113.55	P	P	0.000244	0.000244	0.5	0.4	0.4	0.3	0.4	0.0816497	I	I	I	I	4	0.1	-0.1	NC	NC	4476.5	4758.5	4617.5	P	P
266215_at	AT2G06850	12	4	4	4	NC	NC	NC	NC	NC		D	NC	NC	266215_at	8494.8	6970.5	7732.65	P	P	0.000244	0.000244	8602.2	8921.2	8761.7	P	P	0.000244	0.000244	0.1	0.1	0.1	0.1	0.1	0	NC	NC	NC	NC	4	0	0	NC	NC	9357.8	7515.2	8436.5	P	P
266038_at	AT2G07680	12	4	4	4	NC	NC	NC	I	NC	NC		NC		266038_at	323	251	287	P	P	0.030273	0.008057	311.3	239	275.15	P	P	0.00293	0.001221	0.3	0.4	0	0.1	0.2	0.182574	NC	NC	NC	NC	4	0	-0.4	NC	NC	228.5	224	226.25	P	P
266959_at	AT2G07690	12	4	4	4	I	NC	NC	I	NC	NC		NC	NC	266959_at	377.7	364.2	370.95	P	P	0.001953	0.005859	518.6	613.9	566.25	P	P	0.000244	0.000732	0.5	0.5	0.7	0.4	0.525	0.125831	I	I	I	I	4	0.1	0.1	NC	NC	318.6	404.8	361.7	P	P
265400_at	AT2G10940	12	4	4	4	NC	NC	NC			NC	D	NC	NC	265400_at	14221.5	15247.3	14734.4	P	P	0.000244	0.000244	16161	17955.1	17058	P	P	0.000244	0.000244	0	0.1	0.2	0.2	0.125	0.0957427	NC	NC	NC	NC	4	-0.1	0.1	NC	NC	15891.1	16534	16212.5	P	P
263349_at	AT2G13370	12	4	4	4		NC	NC	I	NC	NC	NC	NC	NC	263349_at	761.6	794.5	778.05	P	P	0.000732	0.000244	1171.7	891.9	1031.8	P	P	0.000244	0.000732	0.6	0.3	0.4	-0.1	0.3	0.294392	I	NC	I	NC	2	0.4	-0.1	NC	NC	623.2	781.5	702.35	P	P
266587_at	AT2G14880	12	4	4	4		NC	NC	I	NC	NC	NC	NC	NC	266587_at	1351.3	1333.8	1342.55	P	P	0.023926	0.018555	1529.5	1374.6	1452.05	P	P	0.010742	0.008057	0.4	0.3	0.2	0.1	0.25	0.129099	NC	NC	I	NC	3	0	-0.1	NC	NC	1133.7	1226.7	1180.2	P	P
266613_at	AT2G14900	12	4	4	4	D	NC				NC	I	NC	NC	266613_at	3110.8	2648.2	2879.5	P	P	0.000244	0.000244	2054.3	2140.5	2097.4	P	P	0.000732	0.000244	-0.6	-0.4	-0.6	-0.4	-0.5	0.11547	D	D	D	D	4	-0.2	0.2	D	NC	3156.4	2542.3	2849.35	P	P
265918_at	AT2G15090	12	4	4	4	NC	NC	NC	I	NC	NC	D	NC	NC	265918_at	1823.9	1263	1543.45	P	P	0.000244	0.000244	1494.6	1719.8	1607.2	P	P	0.000244	0.000244	-0.1	0.2	0.1	0.3	0.125	0.170783	NC	NC	NC	NC	4	-0.3	0.2	NC	NC	1729.9	1527.8	1628.85	P	P
263565_at	AT2G15390	12	4	4	4	D	NC	NC		NC	NC		NC	NC	263565_at	386.4	379.3	382.85	P	P	0.001221	0.001221	266.4	288.7	277.55	P	P	0.001953	0.00293	-0.8	-0.5	-0.5	-0.4	-0.55	0.173205	D	D	D	D	4	-0.1	0.3	NC	NC	512.2	382.7	447.45	P	P
265475_at	AT2G15620	12	4	4	4	NC	NC	NC			NC	D	NC	NC	265475_at	9929.2	9135.3	9532.25	P	P	0.000244	0.000244	9409.6	9487.4	9448.5	P	P	0.000244	0.000244	0	0	0	0.1	0.025	0.05	NC	NC	NC	NC	4	0	0	NC	NC	9708.3	9520.5	9614.4	P	P
265481_at	AT2G15960	12	4	4	4	D	NC	NC	D	NC	NC	NC	NC	NC	265481_at	4529.2	3850.9	4190.05	P	P	0.000244	0.000244	2923.4	2805	2864.2	P	P	0.000244	0.000244	-0.7	-0.3	-0.7	-0.3	-0.5	0.23094	D	D	D	D	4	-0.4	0	NC	NC	3666.6	3641.6	3654.1	P	P
263098_at	AT2G16005	12	4	4	4	D	NC		D		NC	I	NC	NC	263098_at	2790	2552.2	2671.1	P	P	0.000244	0.000244	1738.9	1604	1671.45	P	P	0.000244	0.000732	-0.8	-0.4	-0.9	-0.5	-0.65	0.238048	D	D	D	D	4	-0.4	-0.1	MD	NC	2096.5	2576.8	2336.65	P	P
263096_at	AT2G16060	12	4	4	4				D	NC	NC				263096_at	6030.3	4272.1	5151.2	P	P	0.000244	0.000244	5623.3	7579.8	6601.55	P	P	0.000244	0.000244	0	0.4	0.3	0.7	0.35	0.288675	NC	I	I	I	1	-0.4	0.4	D	I	5167.1	5718.8	5442.95	P	P
263607_at	AT2G16270	10	4	2	4		NC	NC	I	NC	NC	NC	NC	NC	263607_at	160.9	121.5	141.2	P	P	0.046143	0.046143	228.6	189.7	209.15	P	P	0.010742	0.010742	0.4	1.2	0	0.7	0.575	0.5058	I	NC	NC	NC	1	-0.4	-0.5	NC	NC	105.3	28.2	66.75	A	A
263606_at	AT2G16280	12	4	4	4	I	NC	NC		NC		D	NC	NC	263606_at	2577	2916.3	2746.65	P	P	0.001953	0.000732	3713.1	3687.8	3700.45	P	P	0.000244	0.000244	0.5	0.4	0.4	0.3	0.4	0.0816497	I	I	I	I	4	0.1	-0.1	NC	NC	3227	2177.3	2702.15	P	P
263601_s_at	AT2G16370	12	4	4	4	NC	NC	NC	I	NC	NC	NC	NC	NC	263601_s_at	664.7	605.3	635	P	P	0.001953	0.00415	759.4	726.1	742.75	P	P	0.008057	0.001953	0.3	0.2	0.3	0.2	0.25	0.057735	NC	NC	NC	NC	4	0.1	0.1	NC	NC	736.4	556.6	646.5	P	P
263612_at	AT2G16440	12	4	4	4	I	NC	NC	I	NC	NC	I	NC	NC	263612_at	446.6	525.5	486.05	P	P	0.000244	0.000244	933.6	1057.8	995.7	P	P	0.000244	0.000244	1	0.8	0.9	0.5	0.8	0.216025	I	I	I	I	4	0.3	-0.1	NC	NC	539.3	582.4	560.85	P	P
265352_at	AT2G16600	12	4	4	4			NC	D	NC	NC	NC	NC	NC	265352_at	20461.4	18417.5	19439.5	P	P	0.000244	0.000244	12790.7	16183.6	14487.1	P	P	0.000244	0.000244	-0.7	-0.4	-0.3	-0.2	-0.4	0.216025	D	D	D	NC	3	-0.2	0.3	NC	I	19520.2	20859.9	20190	P	P
265412_at	AT2G16640	12	4	4	4		NC	NC	I	NC	NC	NC	NC	NC	265412_at	1492.3	1466.6	1479.45	P	P	0.001221	0.001953	1655.2	1695.2	1675.2	P	P	0.000244	0.001221	0.4	0.4	0.2	0.1	0.275	0.15	I	I	NC	NC	2	0.1	-0.2	NC	NC	1447.6	1419.7	1433.65	P	P
265414_at	AT2G16660	12	4	4	4	NC	NC	NC				I	NC	NC	265414_at	2026.5	1844.5	1935.5	P	P	0.000244	0.000244	1598.8	1996.6	1797.7	P	P	0.000732	0.000244	-0.2	0.1	-0.2	0.1	-0.05	0.173205	NC	NC	NC	NC	4	-0.2	0.1	NC	NC	1646.8	2286.6	1966.7	P	P
265354_at	AT2G16700	12	4	4	4		NC	NC	D	NC	NC		NC	NC	265354_at	2967	2832	2899.5	P	P	0.000732	0.000732	2043.1	2328.2	2185.65	P	P	0.000244	0.000732	-0.5	-0.5	-0.3	-0.2	-0.375	0.15	D	D	NC	NC	2	0	0.2	NC	NC	3017.5	3225.8	3121.65	P	P
266537_at	AT2G16860	12	4	4	4	NC	NC	NC	I	NC	NC	NC	NC	NC	266537_at	780.3	708.7	744.5	P	P	0.000244	0.000244	799	799.8	799.4	P	P	0.000244	0.000244	0.3	0.1	0.3	0.2	0.225	0.0957427	NC	NC	NC	NC	4	0	-0.1	NC	NC	753.2	681.2	717.2	P	P
263550_at	AT2G17033	12	4	4	4	NC	NC	NC	I	NC	NC	NC	NC	NC	263550_at	1185.1	1126.6	1155.85	P	P	0.000244	0.000244	1188.4	1236.6	1212.5	P	P	0.000244	0.000244	0.2	0.1	0.1	0	0.1	0.0816497	NC	NC	NC	NC	4	-0.1	-0.2	NC	NC	1394.9	1254.4	1324.65	P	P
263584_at	AT2G17040	10	4	4	2	NC	NC	NC	D	NC	NC			NC	263584_at	348.6	408.4	378.5	P	P	0.018555	0.005859	374	329.5	351.75	P	P	0.023926	0.01416	0.1	-0.1	-0.4	-0.4	-0.2	0.244949	NC	NC	NC	NC	4	-0.1	-0.4	NC	NC	345.6	401.4	373.5	P	P
263419_at	AT2G17220	12	4	4	4	NC	NC	NC	NC	NC	NC	I	NC	NC	263419_at	1135	959.8	1047.4	P	P	0.000244	0.000244	1064.5	1091.5	1078	P	P	0.000244	0.000244	0.1	0.1	-0.1	0.1	0.05	0.1	NC	NC	NC	NC	4	-0.2	0	NC	NC	1021.4	1079.1	1050.25	P	P
264850_at	AT2G17340;AT2G17320	12	4	4	4		NC	NC	I	NC	NC	NC	NC	NC	264850_at	2367.2	2858.7	2612.95	P	P	0.001953	0.001221	2913.7	2674.2	2793.95	P	P	0.001221	0.000732	0.3	0.1	0.1	0	0.125	0.125831	I	NC	NC	NC	1	0.2	-0.2	NC	NC	2521.9	2297.7	2409.8	P	P
264878_at	AT2G17410	12	4	4	4		NC	NC	I	NC	NC	NC	NC	NC	264878_at	895.1	1187.8	1041.45	P	P	0.00293	0.001953	1283.2	1090.4	1186.8	P	P	0.000732	0.000732	0.7	0.4	0.4	0.2	0.425	0.206155	I	NC	NC	NC	1	0.2	-0.3	NC	NC	996.8	774.5	885.65	P	P
263073_at	AT2G17500	12	4	4	4	NC	NC	NC		NC	NC	I	NC	NC	263073_at	3300.7	3067	3183.85	P	P	0.000732	0.000732	2829.7	3275.9	3052.8	P	P	0.001221	0.000732	0	-0.1	0	0	-0.025	0.05	NC	NC	NC	NC	4	0.1	0.1	NC	NC	3206.8	2863.6	3035.2	P	P
264592_at	AT2G17720	12	4	4	4		NC	NC			NC	I	NC	NC	264592_at	3144	3820.3	3482.15	P	P	0.000244	0.000244	3055.4	3323.2	3189.3	P	P	0.000244	0.000244	-0.2	-0.5	0	-0.3	-0.25	0.208167	NC	D	NC	D	2	0.3	0.1	NC	NC	4224.5	4186.8	4205.65	P	P
264788_at	AT2G17880	5	1	2	2		NC	NC		NC	NC	D	NC	NC	264788_at	212.3	138.1	175.2	P	A	0.037598	0.067627	85.6	120.6	103.1	A	A	0.5	0.246094	-0.9	-0.7	-1	-0.7	-0.825	0.15	D	MD	NC	NC	1	-0.1	0.1	NC	NC	152	157.7	154.85	A	P
265327_at	AT2G18210	12	4	4	4	D	NC	NC		NC		NC	NC	NC	265327_at	987.7	723.6	855.65	P	P	0.010742	0.018555	600.6	640.5	620.55	P	P	0.030273	0.010742	-0.5	-0.3	-0.6	-0.2	-0.4	0.182574	D	D	D	D	4	-0.2	-0.1	NC	NC	908.2	794.9	851.55	P	P
265340_at	AT2G18330	12	4	4	4		NC	NC	I	NC	NC		NC	NC	265340_at	622.2	743.5	682.85	P	P	0.000244	0.000244	890.1	738.7	814.4	P	P	0.000244	0.000244	0.5	0.3	0.1	0	0.225	0.221736	I	NC	NC	NC	1	0.2	-0.4	NC	NC	563.8	657.8	610.8	P	P
265926_at	AT2G18600	12	4	4	4			NC	D	NC	NC	NC	NC	NC	265926_at	704.8	1008.7	856.75	P	P	0.000244	0.000244	485.1	677.8	581.45	P	P	0.000244	0.000244	-0.6	-1	0	-0.5	-0.525	0.411299	D	D	NC	D	3	0.2	0.4	NC	I	765.3	959.2	862.25	P	P
266017_at	AT2G18690	12	4	4	4		NC	NC	D	NC	NC		NC	NC	266017_at	399.7	433.3	416.5	P	P	0.023926	0.005859	132.2	143.1	137.65	P	P	0.028564	0.010742	-0.2	-0.3	-0.6	-0.7	-0.45	0.238048	D	NC	D	D	3	0.1	-0.3	NC	NC	402.2	544.5	473.35	P	P
266018_at	AT2G18710	12	4	4	4		NC	NC	I	NC	NC	NC	NC	NC	266018_at	3207	3154.9	3180.95	P	P	0.000244	0.000244	3695	3408.3	3551.65	P	P	0.000244	0.000244	0.3	0.2	0.2	0.1	0.2	0.0816497	MI	NC	NC	NC	1	0.1	-0.2	NC	NC	3177.4	3148.9	3163.15	P	P
266938_at	AT2G18950	12	4	4	4	NC	NC	NC	NC	NC	NC	I	NC	NC	266938_at	860.4	1214.5	1037.45	P	P	0.000244	0.000244	1172.1	1154.8	1163.45	P	P	0.000244	0.000244	0.1	0	0.1	-0.1	0.025	0.0957427	NC	NC	NC	NC	4	0.2	-0.1	NC	NC	1363.7	1176.8	1270.25	P	P
267336_at	AT2G19310	12	4	4	4	NC	NC	NC		NC		I	NC	NC	267336_at	2729.4	2098.4	2413.9	P	P	0.000732	0.000732	1888.6	2706.4	2297.5	P	P	0.000732	0.000244	-0.3	-0.1	0	0.2	-0.05	0.208167	NC	NC	NC	NC	4	-0.2	0.3	NC	NC	2701.8	1862.6	2282.2	P	P
265940_at	AT2G19480	12	4	4	4		NC	NC	I	NC	NC	NC	NC	NC	265940_at	3688.5	4138.4	3913.45	P	P	0.000244	0.000244	4929	4478.6	4703.8	P	P	0.000244	0.000244	0.4	0.3	0.2	0	0.225	0.170783	I	I	I	NC	3	0.2	-0.2	NC	NC	3834.1	3967.2	3900.65	P	P
265943_at	AT2G19570	12	4	4	4			NC	D	NC	NC		NC	NC	265943_at	2292.2	1896.2	2094.2	P	P	0.000244	0.000244	1396	1540.4	1468.2	P	P	0.000732	0.000244	-0.9	-0.7	-0.5	-0.2	-0.575	0.298608	D	D	D	MD	3	-0.2	0.4	NC	I	1960.9	2014.2	1987.55	P	P
265948_at	AT2G19590	12	4	4	4			NC	D	NC	NC	NC	NC	NC	265948_at	1223.1	1301.9	1262.5	P	P	0.000244	0.001953	1352.4	1627.9	1490.15	P	P	0.001953	0.001221	-0.4	-0.3	0.1	0.1	-0.125	0.262996	D	D	NC	NC	2	0	0.3	NC	I	1081.8	935	1008.4	P	P
265588_at	AT2G19970	9	3	2	4			NC	D	NC	NC	D	NC	NC	265588_at	1204.7	948.3	1076.5	P	P	0.018555	0.030273	501.1	1167.8	834.45	A	P	0.129639	0.00293	-1.1	-1	0.3	0.3	-0.375	0.780491	D	D	NC	NC	2	-0.1	1.1	NC	I	968.4	1551.8	1260.1	P	P
265586_at	AT2G19990	9	3	2	4			NC		NC	NC	D	NC	NC	265586_at	354.1	357.3	355.7	P	P	0.037598	0.030273	212.1	458.6	335.35	A	P	0.111572	0.010742	-0.5	-0.8	0.6	0.3	-0.1	0.658281	NC	D	I	NC	2	0.2	0.9	NC	I	406.8	318	362.4	P	P
265596_at	AT2G20020	12	4	4	4	NC	NC	NC	I	NC	NC	NC	NC	NC	265596_at	704.3	718.8	711.55	P	P	0.000732	0.000732	727.5	944.5	836	P	P	0.001221	0.000732	0.1	0.1	0.2	0.3	0.175	0.0957427	NC	NC	NC	NC	4	-0.1	0.1	NC	NC	677.2	720.3	698.75	P	P
265310_at	AT2G20280	12	4	4	4		NC	NC	I	NC	NC	NC	NC	NC	265310_at	1460.5	2080.6	1770.55	P	P	0.001221	0.000244	2364.6	1710.4	2037.5	P	P	0.000244	0.000244	0.4	0.2	0.2	0.1	0.225	0.125831	I	NC	NC	NC	1	0.2	-0.2	NC	NC	1496.7	1671.4	1584.05	P	P
263715_at	AT2G20570	12	4	4	4	I	NC	NC	NC	NC	NC	NC	NC	NC	263715_at	1557.7	2023.1	1790.4	P	P	0.000244	0.000732	2365.6	2123.3	2244.45	P	P	0.000244	0.000244	0.4	0.5	0.6	0.6	0.525	0.0957427	I	I	I	I	4	-0.1	0.1	NC	NC	1548	1451.2	1499.6	P	P
265387_at	AT2G20670	8	3	3	2	D	NC	NC	D	NC		D	NC	NC	265387_at	2099.9	2265.6	2182.75	P	P	0.000732	0.001221	683.8	477.9	580.85	P	A	0.046143	0.067627	-1.7	-1.9	-2	-2.1	-1.925	0.170783	D	D	D	D	4	0.1	-0.4	NC	NC	1990.3	1237	1613.65	P	P
264022_at	AT2G21185	11	4	3	4		NC	NC	D	NC	NC	NC	NC	NC	264022_at	2419.8	2103	2261.4	P	P	0.023926	0.046143	2425.3	1705.1	2065.2	P	P	0.046143	0.030273	-0.1	0.1	-0.4	-0.2	-0.15	0.208167	NC	NC	D	NC	3	-0.2	-0.4	NC	NC	2523.3	2397.3	2460.3	P	P
263760_at	AT2G21280	12	4	4	4	NC	NC	NC		NC	NC	D	NC	NC	263760_at	2855.9	2663	2759.45	P	P	0.000244	0.000244	2964.8	3017.2	2991	P	P	0.000244	0.000244	0	0.1	0	0	0.025	0.05	NC	NC	NC	NC	4	-0.1	-0.2	NC	NC	2832.2	3071.8	2952	P	P
263763_at	AT2G21385	12	4	4	4		NC		I	NC	NC	NC	NC	NC	263763_at	868	1222.4	1045.2	P	P	0.001221	0.000732	1346	1402.8	1374.4	P	P	0.000732	0.000732	0.6	0.3	0.4	0.1	0.35	0.208167	I	MI	I	NC	2	0.2	-0.3	I	NC	1234.1	1167.3	1200.7	P	P
263515_at	AT2G21640	12	4	4	4		NC	NC			NC	I	NC	NC	263515_at	691	677.7	684.35	P	P	0.001953	0.001221	619.2	485.3	552.25	P	P	0.005859	0.000732	-0.5	-0.4	-0.2	-0.2	-0.325	0.15	D	D	NC	NC	2	-0.1	0.2	NC	NC	512.5	712.2	612.35	P	P
263549_at	AT2G21650	12	4	4	4			NC				D	NC	NC	263549_at	601.3	628.5	614.9	P	P	0.018555	0.01416	1315.7	904.5	1110.1	P	P	0.00415	0.00415	1.2	1	0.6	0.5	0.825	0.330404	I	I	I	NC	3	0.1	-0.6	NC	D	907.4	509.9	708.65	P	P
263882_at	AT2G21790	12	4	4	4	I	NC	NC	I	NC	NC	NC	NC	NC	263882_at	1212	1304.6	1258.3	P	P	0.000244	0.000244	2322.8	2206.8	2264.8	P	P	0.000244	0.000244	0.9	0.9	0.7	0.6	0.775	0.15	I	I	I	I	4	0.1	-0.1	NC	NC	1271.5	1313.1	1292.3	P	P
263880_at	AT2G21960	12	4	4	4	NC	NC	NC	NC	NC	NC	D	NC	NC	263880_at	2806.8	2777.3	2792.05	P	P	0.000244	0.000244	2790.7	2602.7	2696.7	P	P	0.000244	0.000244	0.1	0.2	0	0.1	0.1	0.0816497	NC	NC	NC	NC	4	-0.1	-0.2	NC	NC	2691.1	2909	2800.05	P	P
263431_at	AT2G22170	12	4	4	4			NC	D	NC	NC	NC	NC	NC	263431_at	16836.6	14030	15433.3	P	P	0.000244	0.000244	8332.3	12866.1	10599.2	P	P	0.000244	0.000244	-0.9	-0.7	-0.3	-0.1	-0.5	0.365148	D	D	D	NC	3	-0.2	0.6	NC	I	12757	16256	14506.5	P	P
264048_at	AT2G22400	12	4	4	4		NC	NC	I	NC	NC		NC	NC	264048_at	1286.4	1337.8	1312.1	P	P	0.000244	0.000244	1766.4	1410	1588.2	P	P	0.000244	0.000244	0.5	0.4	0.3	0.2	0.35	0.129099	I	I	NC	NC	2	0.1	-0.2	NC	NC	1089.6	1160.5	1125.05	P	P
264004_at	AT2G22425	12	4	4	4		NC	NC	D	NC	NC	NC	NC	NC	264004_at	4468	4443.5	4455.75	P	P	0.000244	0.000244	3444.2	4028.1	3736.15	P	P	0.000244	0.000244	-0.2	-0.3	-0.1	-0.1	-0.175	0.0957427	NC	D	NC	NC	3	0	0.2	NC	NC	4201.4	4488.3	4344.85	P	P
264006_at	AT2G22430	12	4	4	4	NC	NC	NC			NC	I	NC	NC	264006_at	4461.3	3819.8	4140.55	P	P	0.000732	0.000732	4211.7	3912.1	4061.9	P	P	0.000732	0.000244	0.1	0.1	0.2	0.2	0.15	0.057735	NC	NC	NC	NC	4	-0.1	0.1	NC	NC	3915.4	4047.4	3981.4	P	P
265349_at	AT2G22610	12	4	4	4	NC	NC	NC	I	NC	NC	NC	NC	NC	265349_at	128.4	121.7	125.05	P	P	0.046143	0.00415	230.9	142.1	186.5	P	P	0.010742	0.01416	1.1	0.6	0	0.2	0.475	0.485627	NC	NC	NC	NC	4	0.1	-0.5	NC	NC	89.9	108.9	99.4	P	P
265318_at	AT2G22650	7	0	3	4		NC		I	NC	NC	NC	NC	NC	265318_at	248.1	371.2	309.65	A	M	0.111572	0.056152	324.7	364.5	344.6	M	A	0.056152	0.067627	0.4	0	0.3	-0.1	0.15	0.238048	MI	NC	NC	NC	1	0.5	-0.1	I	NC	226.5	282.9	254.7	P	M
265319_at	AT2G22670	12	4	4	4	I	NC	NC		NC	NC	NC	NC	NC	265319_at	6097.1	6625.5	6361.3	P	P	0.000244	0.000244	8492.3	8179.6	8335.95	P	P	0.000244	0.000244	0.6	0.4	0.4	0.3	0.425	0.125831	I	I	I	I	4	0.2	-0.1	NC	NC	6306.8	5710.9	6008.85	P	P
266456_at	AT2G22770	12	4	4	4	NC	NC	NC		NC	NC	I	NC	NC	266456_at	888.2	737.1	812.65	P	P	0.005859	0.030273	1027.5	721.9	874.7	P	P	0.005859	0.008057	0.1	0	0	0.1	0.05	0.057735	NC	NC	NC	NC	4	-0.1	0.1	NC	NC	929.8	597.9	763.85	P	P
267259_at	AT2G23090	12	4	4	4		NC	NC	D	NC	NC	NC	NC	NC	267259_at	12558.4	10582.1	11570.2	P	P	0.000244	0.000244	8239.9	10199.9	9219.9	P	P	0.000244	0.000244	-0.6	-0.4	-0.3	0	-0.325	0.25	D	D	MD	NC	2	-0.2	0.3	NC	NC	12052.7	12624	12338.4	P	P
245074_at	AT2G23200	12	4	4	4	NC	NC	NC			NC	I	NC	NC	245074_at	369.2	398.3	383.75	P	P	0.008057	0.005859	546.2	547.9	547.05	P	P	0.01416	0.008057	0.2	0.3	0.2	0.2	0.225	0.05	NC	NC	NC	NC	4	0	-0.1	NC	NC	487.3	503.4	495.35	P	P
267130_at	AT2G23390	12	4	4	4	NC	NC	NC	I	NC	NC	NC	NC	NC	267130_at	1307	1540.9	1423.95	P	P	0.000244	0.000244	1948.5	1626.7	1787.6	P	P	0.000244	0.000244	0.2	0.3	0.2	0.1	0.2	0.0816497	NC	NC	NC	NC	4	0.1	-0.2	NC	NC	1402.3	1293.6	1347.95	P	P
267134_at	AT2G23450	12	4	4	4	NC	NC	NC	NC	NC	NC	I	NC	NC	267134_at	874.9	929.7	902.3	P	P	0.01416	0.01416	1122.9	869.1	996	P	P	0.01416	0.010742	0.1	0.1	-0.2	-0.1	-0.025	0.15	NC	NC	NC	NC	4	0.1	-0.2	NC	NC	901.7	775.8	838.75	P	P
267123_at	AT2G23560	10	3	4	3	NC	NC	NC			NC	D	NC	NC	267123_at	437.6	451.3	444.45	A	P	0.067627	0.023926	435.7	522.7	479.2	P	P	0.023926	0.01416	0	0	0.2	0	0.05	0.1	NC	NC	NC	NC	4	0	0.3	NC	NC	460.6	360.1	410.35	P	P
267128_at	AT2G23620	12	4	4	4	D	NC	NC			NC	I		NC	267128_at	1181.3	1256.5	1218.9	P	P	0.000732	0.000244	861.5	649.3	755.4	P	P	0.000732	0.001221	-0.5	-0.6	-0.7	-1	-0.7	0.216025	D	D	D	D	4	0.1	-0.1	NC	NC	1347.8	1349	1348.4	P	P
267290_at	AT2G23750	12	4	4	4	NC	NC	NC	I	NC	NC	NC	NC	NC	267290_at	478.6	542.6	510.6	P	P	0.000244	0.000732	551.8	531.1	541.45	P	P	0.000244	0.000732	0.3	0.3	0.1	0.1	0.2	0.11547	NC	NC	NC	NC	4	0.1	-0.1	NC	NC	383.2	430.3	406.75	P	P
267298_at	AT2G23760	12	4	4	4	NC	NC	NC	I	NC	NC	NC	NC	NC	267298_at	549.8	587.5	568.65	P	P	0.001953	0.001221	728	644.6	686.3	P	P	0.001221	0.000732	0.5	0.3	0.4	0.1	0.325	0.170783	NC	NC	NC	NC	4	0.1	-0.2	NC	NC	460.5	452.5	456.5	P	P
267293_at	AT2G23810	12	4	4	4		NC	NC	D		NC	I	NC	NC	267293_at	5111	5067.1	5089.05	P	P	0.000244	0.000244	3675.9	3473.2	3574.55	P	P	0.000244	0.000244	-0.4	-0.3	-0.5	-0.3	-0.375	0.0957427	D	D	D	MD	3	-0.1	0	NC	NC	6094.3	5027.1	5560.7	P	P
266567_at	AT2G24050	12	4	4	4		NC	NC	I	NC	NC		NC	NC	266567_at	973.4	830.8	902.1	P	P	0.01416	0.010742	962.1	1013.8	987.95	P	P	0.00415	0.001221	0.2	0.1	0.3	0.4	0.25	0.129099	NC	NC	I	NC	3	0	0.2	NC	NC	877.4	922.6	900	P	P
266575_at	AT2G24060	12	4	4	4	NC	NC	NC	I	NC	NC		NC	NC	266575_at	1595.2	1781	1688.1	P	P	0.000244	0.000244	1983.2	1854.3	1918.75	P	P	0.000244	0.000244	0.2	0.1	0.1	0.1	0.125	0.05	NC	NC	NC	NC	4	0.1	-0.1	NC	NC	1562	1589.4	1575.7	P	P
266570_at	AT2G24090	12	4	4	4	NC	NC	NC		NC	NC	D	NC	NC	266570_at	8570.6	7072.3	7821.45	P	P	0.000244	0.000244	7066.2	8157.9	7612.05	P	P	0.000244	0.000244	-0.2	0	-0.1	0.2	-0.025	0.170783	NC	NC	NC	NC	4	-0.2	0.1	NC	NC	9699.6	8199.6	8949.6	P	P
265998_at	AT2G24270	12	4	4	4		NC	NC	I	NC	NC	NC	NC	NC	265998_at	5073.1	5094.8	5083.95	P	P	0.000244	0.000244	5964.1	5525.8	5744.95	P	P	0.000244	0.000244	0.4	0.3	0.1	0.1	0.225	0.15	I	I	NC	NC	2	0	-0.2	NC	NC	5012.9	4542.9	4777.9	P	P
263799_at	AT2G24550	12	4	4	4	D	NC	NC					NC	NC	263799_at	1593.7	1997.5	1795.6	P	P	0.001953	0.001953	1348.3	1329.1	1338.7	P	P	0.00293	0.00415	-0.3	-0.3	-0.4	-0.5	-0.375	0.0957427	D	D	D	D	4	0	-0.1	NC	NC	2304.6	1939	2121.8	P	P
263539_at	AT2G24850	11	4	4	3		NC		D	NC	NC	I			263539_at	1399.9	837.5	1118.7	P	P	0.000244	0.000244	1058.1	871.8	964.95	P	P	0.000244	0.000244	-0.5	0.1	-0.5	0	-0.225	0.320156	D	NC	D	NC	2	-0.6	0	D	NC	897.5	653.3	775.4	P	P
263536_at	AT2G25000	12	4	4	4	NC	NC	NC		NC		I	NC	NC	263536_at	878.8	976.9	927.85	P	P	0.001953	0.001953	707.7	710.3	709	P	P	0.00415	0.030273	-0.3	-0.3	-0.3	-0.3	-0.3	0	NC	NC	NC	NC	4	0.1	0	NC	NC	1029.1	871.1	950.1	P	P
264383_at	AT2G25080	12	4	4	4		NC	NC		NC	NC	D	NC	NC	264383_at	5520.5	5683	5601.75	P	P	0.000244	0.000244	7695.2	6544.1	7119.65	P	P	0.000244	0.000244	0.3	0.3	0.2	0	0.2	0.141421	I	I	NC	NC	2	0	-0.3	NC	NC	6277.2	5430	5853.6	P	P
264404_at	AT2G25160	3	1	0	2	NC	NC	NC	NC	NC	NC	D	NC	NC	264404_at	332.7	371.1	351.9	M	A	0.056152	0.111572	370.3	273.5	321.9	P	A	0.037598	0.129639	0.2	0.1	-0.2	-0.2	-0.025	0.206155	NC	NC	NC	NC	4	0.1	-0.4	NC	NC	283.9	203.8	243.85	A	A
264379_at	AT2G25200	12	4	4	4	D	NC	NC	D	NC	NC		NC	NC	264379_at	846.7	994	920.35	P	P	0.000244	0.001221	529.8	447.1	488.45	P	P	0.00415	0.005859	-0.9	-1.1	-1.2	-1.1	-1.075	0.125831	D	D	D	D	4	0.2	-0.3	NC	NC	919.1	817.9	868.5	P	P
265910_at	AT2G25610	12	4	4	4		NC		D	NC	NC	NC	NC	NC	265910_at	2959.4	3486.5	3222.95	P	P	0.000244	0.000244	2834.6	3383.6	3109.1	P	P	0.000244	0.000244	0	-0.2	0.1	-0.1	-0.05	0.129099	NC	D	NC	NC	3	0.2	0.2	I	NC	3630.5	4000.7	3815.6	P	P
265896_at	AT2G25660	12	4	4	4		NC	NC	I	NC	NC	NC	NC	NC	265896_at	383	564.9	473.95	P	P	0.01416	0.023926	627.7	485.6	556.65	P	P	0.010742	0.010742	0.8	0.4	0.3	0	0.375	0.330404	I	NC	NC	NC	1	0.3	-0.4	NC	NC	380	357.6	368.8	P	P
266658_at	AT2G25735	12	4	4	4		NC	NC	D	NC	NC		NC	NC	266658_at	647.6	505.1	576.35	P	P	0.000244	0.001953	467.3	396.5	431.9	P	P	0.010742	0.001953	-0.4	-0.3	-0.8	-0.6	-0.525	0.221736	D	NC	D	D	3	-0.2	-0.2	NC	NC	674	601.7	637.85	P	P
266652_at	AT2G25760	12	4	4	4		NC	NC	I	NC	NC		NC	NC	266652_at	982.1	1038	1010.05	P	P	0.000244	0.000244	1243.3	1298.9	1271.1	P	P	0.000244	0.000244	0.3	0.2	0.3	0.1	0.225	0.0957427	I	NC	NC	NC	1	0.1	-0.1	NC	NC	1145.6	1056.3	1100.95	P	P
266648_at	AT2G25840	12	4	4	4		NC	NC	I	NC	NC	NC	NC	NC	266648_at	1398.1	1833.9	1616	P	P	0.000244	0.000244	1724.5	1699	1711.75	P	P	0.000244	0.000244	0.4	0.1	0.4	0.1	0.25	0.173205	I	NC	NC	NC	1	0.2	0	NC	NC	1482.2	1239.1	1360.65	P	P
266678_at	AT2G25870	12	4	4	4		NC	NC	I	NC	NC		NC	NC	266678_at	2106.9	2356.9	2231.9	P	P	0.000732	0.000732	2669.2	2103	2386.1	P	P	0.000732	0.000732	0.2	0.2	0.1	0	0.125	0.0957427	I	NC	NC	NC	1	0	-0.2	NC	NC	1820.1	1909.1	1864.6	P	P
266656_at	AT2G25900	12	4	4	4	D	NC	NC		NC		D	NC		266656_at	1410.6	1504	1457.3	P	P	0.001953	0.000244	990.6	687.4	839	P	P	0.005859	0.005859	-0.6	-0.6	-0.9	-1.1	-0.8	0.244949	D	D	D	D	4	0	-0.4	NC	NC	1460.9	965.6	1213.25	P	P
267400_at	AT2G26240	12	4	4	4		NC	NC	D	NC	NC	NC	NC	NC	267400_at	3657.8	3025.9	3341.85	P	P	0.000244	0.000244	2701.2	3007.6	2854.4	P	P	0.000244	0.000244	-0.4	-0.2	-0.2	0	-0.2	0.163299	D	NC	NC	NC	1	-0.2	0.2	NC	NC	3081.3	3240.4	3160.85	P	P
267376_at	AT2G26330	12	4	4	4	I	NC	NC	I	NC	NC		NC	NC	267376_at	459.9	589.7	524.8	P	P	0.005859	0.005859	918.6	785.4	852	P	P	0.001953	0.000732	1.3	1	0.7	0.3	0.825	0.4272	I	I	I	I	4	0.4	-0.5	NC	NC	463.5	515.5	489.5	P	P
245041_at	AT2G26530	12	4	4	4		NC	NC	D	NC	NC	NC	NC	NC	245041_at	481	519	500	P	P	0.001953	0.005859	502.4	347.8	425.1	P	P	0.008057	0.010742	-0.2	-0.2	-0.7	-0.8	-0.475	0.320156	D	NC	D	D	3	0.2	-0.6	NC	NC	422.4	521.1	471.75	P	P
245027_at	AT2G26550	12	4	4	4	NC	NC	NC	I	NC	NC	NC	NC	NC	245027_at	652.4	678.5	665.45	P	P	0.001953	0.000732	899.1	677.4	788.25	P	P	0.001221	0.001953	0.6	0.4	0.2	0	0.3	0.258199	NC	NC	NC	NC	4	0.3	-0.4	NC	NC	633.2	614.9	624.05	P	P
245028_at	AT2G26570	12	4	4	4		NC	NC	I	NC	NC	NC	NC	NC	245028_at	326.5	570	448.25	P	P	0.046143	0.037598	631.3	527	579.15	P	P	0.037598	0.010742	0.9	0.4	0.7	0.1	0.525	0.35	I	NC	NC	NC	1	0.4	-0.4	NC	NC	528.5	443.5	486	P	P
267607_s_at	AT2G26750;AT2G26740	12	4	4	4	D	NC	NC	D	NC	NC	I	NC	NC	267607_s_at	6747.3	7552.2	7149.75	P	P	0.000244	0.000244	4439.9	4797.4	4618.65	P	P	0.000244	0.000244	-0.7	-0.6	-0.5	-0.5	-0.575	0.0957427	D	D	D	D	4	0	0.1	NC	NC	6906.1	8192.4	7549.25	P	P
266856_at	AT2G26910	12	4	4	4		NC	NC	I	NC	NC		NC	NC	266856_at	1437.6	1385.6	1411.6	P	P	0.000244	0.000244	1951	1745.6	1848.3	P	P	0.000244	0.000244	0.5	0.6	0.2	0.2	0.375	0.206155	I	I	NC	NC	2	-0.1	-0.4	NC	NC	1127.8	1186.5	1157.15	P	P
266314_at	AT2G27040	12	4	4	4		NC	NC	I	NC	NC	NC	NC	NC	266314_at	1212	1368.1	1290.05	P	P	0.001953	0.001953	1583.6	1484.1	1533.85	P	P	0.001221	0.001221	0.5	0.3	0.4	0.2	0.35	0.129099	I	NC	I	NC	2	0.2	-0.2	NC	NC	1042.4	1327.2	1184.8	P	P
266302_at	AT2G27050	12	4	4	4		NC	NC	I	NC	NC	NC	NC	NC	266302_at	1262.8	1124.2	1193.5	P	P	0.00293	0.000244	1353.5	1450.1	1401.8	P	P	0.000244	0.000732	0.5	0.5	0.1	0.2	0.325	0.206155	I	I	NC	NC	2	0.2	-0.1	NC	NC	1199.7	1065.4	1132.55	P	P
265629_at	AT2G27230	12	4	4	4		NC	NC	I	NC	NC		NC	NC	265629_at	479.5	442.3	460.9	P	P	0.001953	0.000732	986.6	816.9	901.75	P	P	0.000244	0.000244	1	0.6	0.6	0	0.55	0.412311	I	I	MI	NC	2	0.2	-0.3	NC	NC	535.7	497.4	516.55	P	P
266247_at	AT2G27660	12	4	4	4	NC	NC	NC		NC	NC	I	NC	NC	266247_at	487.6	323.6	405.6	P	P	0.001953	0.001221	383.4	420.7	402.05	P	P	0.00293	0.001953	-0.2	0.1	-0.3	0.1	-0.075	0.206155	NC	NC	NC	NC	4	-0.2	0	NC	NC	427.5	448.4	437.95	P	P
266259_at	AT2G27830	12	4	4	4	D	NC	NC	D	NC	NC		NC	NC	266259_at	1485	1345.2	1415.1	P	P	0.001221	0.001953	921.9	826.8	874.35	P	P	0.005859	0.00415	-0.7	-0.5	-0.8	-0.7	-0.675	0.125831	D	D	D	D	4	-0.1	-0.1	NC	NC	1269.6	1303.7	1286.65	P	P
266166_at	AT2G28080	12	4	4	4	I	NC	NC		NC	NC	NC	NC	NC	266166_at	1478.8	1552.9	1515.85	P	P	0.000244	0.000244	2081.8	2068.1	2074.95	P	P	0.000244	0.000244	0.5	0.4	0.5	0.4	0.45	0.057735	I	I	I	I	4	0	0	NC	NC	1713.6	1361.8	1537.7	P	P
266140_at	AT2G28120	5	2	3	0	D	NC	NC	D	NC	NC		NC	NC	266140_at	994.6	938.6	966.6	P	P	0.008057	0.01416	365.2	456.7	410.95	A	A	0.129639	0.080566	-1.1	-0.9	-0.8	-0.9	-0.925	0.125831	D	D	D	D	4	-0.1	0.4	NC	NC	547.4	792.9	670.15	P	P
265542_at	AT2G28290	12	4	4	4		NC	NC	I	NC	NC	NC	NC	NC	265542_at	834.8	1068.6	951.7	P	P	0.001221	0.000732	1193.2	978.2	1085.7	P	P	0.000732	0.001221	0.4	0.4	0.2	0	0.25	0.191485	I	I	NC	NC	2	0.1	-0.2	NC	NC	894.2	700.5	797.35	P	P
265276_at	AT2G28400	12	4	4	4	D	NC	NC	D		NC	I		NC	265276_at	793.1	628	710.55	P	P	0.000732	0.001953	379.3	435.7	407.5	P	P	0.00415	0.000732	-0.5	-0.6	-0.7	-0.5	-0.575	0.0957427	D	D	D	D	4	-0.1	0.1	NC	NC	856.6	996	926.3	P	P
264078_at	AT2G28470	12	4	4	4		NC	NC	I	NC	NC	NC	NC	NC	264078_at	1607.9	2053.6	1830.75	P	P	0.000732	0.000732	2643.8	2280.1	2461.95	P	P	0.000732	0.000244	0.6	0.3	0.4	0.2	0.375	0.170783	I	NC	I	NC	2	0.2	-0.2	NC	NC	1835.6	1794.6	1815.1	P	P
264076_at	AT2G28540	12	4	4	4	NC	NC	NC	I	NC	NC	NC	NC	NC	264076_at	829	875.6	852.3	P	P	0.001221	0.001221	1074.4	892.4	983.4	P	P	0.000732	0.000732	0.3	0.3	0.1	0	0.175	0.15	NC	NC	NC	NC	4	0.1	-0.2	NC	NC	756.9	853.9	805.4	P	P
263435_at	AT2G28600	12	4	4	4		NC	NC	I	NC	NC		NC	NC	263435_at	800.7	899.7	850.2	P	P	0.000732	0.000244	1182.1	1078	1130.05	P	P	0.000244	0.000244	0.5	0.4	0.3	0.1	0.325	0.170783	I	I	NC	NC	2	0.1	-0.2	NC	NC	888.7	866.8	877.75	P	P
263441_at	AT2G28620	8	2	2	4	NC	NC	NC	I	NC	NC	NC	NC	NC	263441_at	135.8	166.9	151.35	A	P	0.080566	0.023926	135.9	67.1	101.5	M	P	0.056152	0.046143	0.4	-0.2	-0.6	-1.2	-0.4	0.6733	NC	NC	NC	NC	4	0.3	-0.5	NC	NC	153.8	101.5	127.65	M	M
266222_at	AT2G28780	12	4	4	4	I	NC	NC		NC	NC	D	NC	NC	266222_at	252.9	358.2	305.55	P	P	0.001221	0.008057	546.5	507.5	527	P	P	0.005859	0.001953	1	0.4	1	0.5	0.725	0.320156	I	I	I	I	4	0.3	0	NC	NC	257	200.3	228.65	P	P
266223_at	AT2G28790	12	4	4	4	I	NC	NC			NC		NC	NC	266223_at	2832.4	2687.5	2759.95	P	P	0.000244	0.000244	4139	3571.1	3855.05	P	P	0.000244	0.000244	0.5	0.6	0.3	0.3	0.425	0.15	I	I	I	I	4	0	-0.3	NC	NC	2535.1	3079.7	2807.4	P	P
266224_at	AT2G28800	12	4	4	4		NC		I	NC	NC	NC	NC	NC	266224_at	5764.8	6697.4	6231.1	P	P	0.000244	0.000244	8181.1	6822.1	7501.6	P	P	0.000244	0.000244	0.4	0.2	0.3	0	0.225	0.170783	I	NC	I	NC	2	0.2	-0.2	I	NC	6696.3	6080.6	6388.45	P	P
266225_at	AT2G28900	12	4	4	4			NC			NC	I	NC	NC	266225_at	9697.1	9815.8	9756.45	P	P	0.000244	0.000244	6239.9	9522.2	7881.05	P	P	0.000244	0.000244	-0.5	-0.8	0.3	0.1	-0.225	0.512348	D	D	I	NC	2	0.1	0.8	NC	I	10652.3	10861.3	10756.8	P	P
266803_at	AT2G28930	12	4	4	4		NC	NC	I	NC	NC		NC	NC	266803_at	871.4	970.2	920.8	P	P	0.010742	0.008057	1140.4	1096.9	1118.65	P	P	0.008057	0.005859	0.5	0.1	0.3	0.1	0.25	0.191485	MI	NC	I	NC	1	0.2	0	NC	NC	1150.7	957.2	1053.95	P	P
266790_at	AT2G28950	12	4	4	4	I	NC	NC		NC	NC		NC	NC	266790_at	3125.4	3263.4	3194.4	P	P	0.000244	0.000244	4111	4065.6	4088.3	P	P	0.000244	0.000244	0.5	0.4	0.5	0.5	0.475	0.05	I	I	I	I	4	0.1	0.1	NC	NC	3235.5	3182.9	3209.2	P	P
266778_at	AT2G29090	12	4	4	4	D	NC	NC	NC	NC	NC	NC	NC	NC	266778_at	405.9	393	399.45	P	P	0.001953	0.001221	183.3	260.1	221.7	P	P	0.030273	0.005859	-1.1	-1.2	-0.8	-0.8	-0.975	0.206155	D	D	D	D	4	0	0.1	NC	NC	407.9	422.8	415.35	P	P
266782_at	AT2G29120	4	0	2	2	NC	NC	NC		NC	NC	I	NC	NC	266782_at	379.2	325.8	352.5	M	A	0.056152	0.067627	276.3	258.4	267.35	A	A	0.246094	0.149658	-0.5	-0.4	-0.6	-0.5	-0.5	0.0816497	NC	NC	NC	NC	4	-0.3	-0.2	NC	NC	428.3	363.2	395.75	P	P
266284_at	AT2G29140;AT2G29190	11	4	3	4	NC	NC	NC	I	NC	NC	NC	NC	NC	266284_at	352.5	327.1	339.8	P	P	0.023926	0.030273	358	385	371.5	P	P	0.023926	0.018555	-0.1	0.3	0.1	0.3	0.15	0.191485	NC	NC	NC	NC	4	-0.3	-0.1	NC	NC	243.4	206.1	224.75	P	A
266286_at	AT2G29150	12	4	4	4		NC	NC	NC	NC	NC	D	NC	NC	266286_at	113.9	142.8	128.35	P	P	0.010742	0.018555	249.7	128.5	189.1	P	P	0.008057	0.010742	0.6	0.7	-0.2	-0.1	0.25	0.465475	I	NC	NC	NC	1	0.1	-0.7	NC	NC	166.8	139	152.9	P	P
266283_at	AT2G29210	12	4	4	4		NC	NC	I	NC	NC	NC	NC	NC	266283_at	1039.2	1342.8	1191	P	P	0.000244	0.000244	1997.7	1622.6	1810.15	P	P	0.000244	0.000244	0.4	0.3	0.2	0	0.225	0.170783	I	NC	NC	NC	1	0.2	-0.4	NC	NC	1075.2	928.7	1001.95	P	P
266265_at	AT2G29340	12	4	4	4	D	NC	NC	NC	NC	NC	NC	NC	NC	266265_at	3965.6	3952.9	3959.25	P	P	0.000244	0.000244	3309.5	2941.5	3125.5	P	P	0.000244	0.000244	-0.4	-0.3	-0.5	-0.4	-0.4	0.0816497	D	D	D	D	4	-0.1	-0.1	NC	NC	4031.8	4698.2	4365	P	P
266293_at	AT2G29360	12	4	4	4		NC	NC	I	NC	NC	NC	NC	NC	266293_at	1025	1184	1104.5	P	P	0.001221	0.001221	1416.1	1250.4	1333.25	P	P	0.001221	0.000732	0.3	0.3	0.3	0.1	0.25	0.1	I	NC	NC	NC	1	0.2	-0.2	NC	NC	1215	1220.2	1217.6	P	P
266299_at	AT2G29450	12	4	4	4	NC	NC	NC		NC	NC	I	NC	NC	266299_at	2335	2177.6	2256.3	P	P	0.000244	0.000244	2519.1	2369.6	2444.35	P	P	0.000244	0.000244	0	0.2	0.1	0.2	0.125	0.0957427	NC	NC	NC	NC	4	-0.4	0	NC	NC	2504.9	2114.4	2309.65	P	P
266295_at	AT2G29550	12	4	4	4		NC	NC		NC	NC	D	NC	NC	266295_at	1499.4	1549.9	1524.65	P	P	0.000244	0.000244	1864.8	2082	1973.4	P	P	0.000244	0.000244	0.5	0.3	0.6	0.4	0.45	0.129099	I	MI	I	I	3	0.2	0	NC	NC	1592.9	1755.5	1674.2	P	P
266672_at	AT2G29650	12	4	4	4			NC		NC	NC	D	NC	NC	266672_at	1625.6	1763.5	1694.55	P	P	0.000244	0.000244	2248.5	1624.6	1936.55	P	P	0.000244	0.000244	0.6	0.5	0	-0.2	0.225	0.386221	I	I	NC	NC	2	0.1	-0.6	NC	D	1684.5	1807.2	1745.85	P	P
266805_at	AT2G30010	12	4	4	4		NC	NC	NC	NC	NC	D	NC	NC	266805_at	1660.1	1718.7	1689.4	P	P	0.001221	0.000732	2048.9	2205	2126.95	P	P	0.000732	0.000732	0.4	0.4	0.4	0.4	0.4	0	I	I	I	NC	3	0	-0.2	NC	NC	1426.3	1626.7	1526.5	P	P
267247_at	AT2G30170	12	4	4	4		NC	NC	I	NC	NC	NC	NC	NC	267247_at	1423.7	1788.8	1606.25	P	P	0.008057	0.010742	2018.7	1908.6	1963.65	P	P	0.00415	0.001953	0.5	0.2	0.3	0.1	0.275	0.170783	I	NC	I	NC	2	0.2	-0.1	NC	NC	1874.7	1735.8	1805.25	P	P
267308_at	AT2G30200	12	4	4	4	NC	NC	NC	NC	NC	NC	D	NC	NC	267308_at	2170.4	2060.4	2115.4	P	P	0.000244	0.000244	2149.5	2043.9	2096.7	P	P	0.000244	0.000244	0	0.1	0.2	0.1	0.1	0.0816497	NC	NC	NC	NC	4	0.1	0	NC	NC	2277.5	2223.6	2250.55	P	P
267246_at	AT2G30250	12	4	4	4	NC	NC	NC	NC	NC	NC	I	NC	NC	267246_at	547.8	682.4	615.1	P	P	0.000244	0.000244	531.5	484.5	508	P	P	0.000244	0.000244	-0.1	-0.3	-0.3	-0.2	-0.225	0.0957427	NC	NC	NC	NC	4	0.1	-0.1	NC	NC	540.4	637.2	588.8	P	P
255870_at	AT2G30280	12	4	4	4	NC	NC	NC	I	NC	NC	NC	NC	NC	255870_at	351.3	605.4	478.35	P	P	0.000244	0.000244	487.7	353.7	420.7	P	P	0.001953	0.001953	0.4	0.3	-0.1	0	0.15	0.238048	NC	NC	NC	NC	4	0.1	-0.2	NC	NC	423.1	219.7	321.4	P	P
255872_at	AT2G30360	12	4	4	4	D	NC	NC			NC		NC	NC	255872_at	1065.7	839.7	952.7	P	P	0.000732	0.001221	690.2	619.1	654.65	P	P	0.001221	0.001221	-0.6	-0.6	-0.8	-0.4	-0.6	0.163299	D	D	D	D	4	-0.2	0	NC	NC	868.5	817.5	843	P	P
267471_at	AT2G30390	12	4	4	4		NC	NC	I	NC	NC	NC	NC	NC	267471_at	2537.7	2788.8	2663.25	P	P	0.001953	0.001953	2803.8	2337	2570.4	P	P	0.001221	0.001221	0.3	0.2	0.1	-0.1	0.125	0.170783	I	NC	NC	NC	1	0.2	-0.2	NC	NC	2291.2	2045.1	2168.15	P	P
267496_at	AT2G30550	12	4	4	4		NC	NC	D		NC	I	NC	NC	267496_at	885.2	1001.7	943.45	P	P	0.000244	0.001221	872.1	1070.4	971.25	P	P	0.000244	0.001221	-0.5	-0.2	-0.2	-0.1	-0.25	0.173205	D	NC	NC	NC	1	-0.2	0.2	NC	NC	1103.9	1347.4	1225.65	P	P
267523_at	AT2G30600	12	4	4	4	D	NC	NC	NC	NC	NC	D	NC	NC	267523_at	1589.7	1613.8	1601.75	P	P	0.001953	0.001221	871.4	984.5	927.95	P	P	0.008057	0.005859	-0.7	-0.8	-0.6	-0.8	-0.725	0.0957427	D	D	D	D	4	0.1	0	NC	NC	1273.6	1205.9	1239.75	P	P
267524_at	AT2G30600	12	4	4	4	D	NC	NC	NC	NC	NC		NC	NC	267524_at	922.6	1027.5	975.05	P	P	0.000244	0.000244	785	819.3	802.15	P	P	0.001221	0.001221	-0.6	-0.6	-0.6	-0.8	-0.65	0.1	D	D	D	D	4	0	-0.1	NC	NC	953.9	1029.4	991.65	P	P
267154_at	AT2G30870;AT2G30880	12	4	4	4		NC	NC	D	NC	NC		NC	NC	267154_at	26078.7	24175.1	25126.9	P	P	0.000732	0.000732	19096.6	21610.8	20353.7	P	P	0.000732	0.000732	-0.5	-0.4	-0.3	-0.2	-0.35	0.129099	D	D	D	NC	3	-0.1	0.2	NC	NC	25377.4	24602.3	24989.8	P	P
267209_at	AT2G30930	12	4	4	4			NC	D	NC	NC	NC	NC	NC	267209_at	2760.6	2557	2658.8	P	P	0.000244	0.000244	1885.4	2263.8	2074.6	P	P	0.000244	0.000244	-0.5	-0.5	-0.3	-0.2	-0.375	0.15	D	D	NC	NC	2	-0.1	0.2	NC	I	2645.9	2882.5	2764.2	P	P
266478_at	AT2G31170	12	4	4	4		NC	NC	I	NC	NC		NC	NC	266478_at	698.7	888	793.35	P	P	0.000732	0.000732	1172.5	886.5	1029.5	P	P	0.001221	0.000732	0.6	0.2	0.4	0	0.3	0.258199	I	NC	MI	NC	1	0.2	-0.2	NC	NC	845.6	788.3	816.95	P	P
264086_at	AT2G31190	12	4	4	4	NC	NC	NC	I	NC	NC	NC	NC	NC	264086_at	329.7	265.1	297.4	P	P	0.008057	0.00293	347.6	278.6	313.1	P	P	0.001221	0.00415	0.2	0.4	0.2	0.1	0.225	0.125831	NC	NC	NC	NC	4	-0.3	-0.2	NC	NC	224.5	229.5	227	P	P
264114_at	AT2G31270	12	4	4	4	I	NC	NC	I	NC	NC	NC	NC	NC	264114_at	306.4	364	335.2	P	P	0.00293	0.000732	505.6	448.9	477.25	P	P	0.000732	0.000244	1.1	0.8	0.8	0.5	0.8	0.244949	I	I	I	I	4	0.2	-0.2	NC	NC	224.7	277.4	251.05	P	P
264116_at	AT2G31320	12	4	4	4		NC	NC	I	NC	NC	NC	NC	NC	264116_at	344.1	441.9	393	P	P	0.037598	0.010742	603.4	468.2	535.8	P	P	0.010742	0.005859	0.4	0.3	0.2	0	0.225	0.170783	I	NC	NC	NC	1	0.2	-0.3	NC	NC	361.5	442	401.75	P	P
263252_at	AT2G31380	12	4	4	4			NC	NC	NC	NC	D	NC	NC	263252_at	1539.9	1527.6	1533.75	P	P	0.001221	0.001953	2064.8	1247.4	1656.1	P	P	0.001221	0.001221	0.5	0.6	-0.2	-0.2	0.175	0.434933	I	I	NC	NC	2	0	-0.7	NC	D	1586	1478.7	1532.35	P	P
263250_at	AT2G31390	12	4	4	4			NC	D	NC	NC	NC	NC	NC	263250_at	11340.7	10828.8	11084.8	P	P	0.000244	0.000244	9583.9	12103.9	10843.9	P	P	0.000244	0.000244	-0.3	-0.2	0.1	0.2	-0.05	0.238048	D	NC	NC	NC	1	-0.1	0.3	NC	I	9282	12177.5	10729.8	P	P
263242_at	AT2G31400	12	4	4	4	NC	NC	NC	I	NC	NC		NC	NC	263242_at	5144.4	5281.9	5213.15	P	P	0.000244	0.000244	6168.1	5446.1	5807.1	P	P	0.000244	0.000244	0.2	0.2	0.1	0.1	0.15	0.057735	NC	NC	NC	NC	4	0.1	-0.1	NC	NC	4884.5	5496.1	5190.3	P	P
263425_at	AT2G31530	12	4	4	4		NC	NC	I	NC	NC	NC	NC	NC	263425_at	673.8	647.6	660.7	P	P	0.000244	0.000244	879	639.1	759.05	P	P	0.000244	0.000244	0.5	0.5	0	0.2	0.3	0.244949	I	I	NC	NC	2	-0.2	-0.4	NC	NC	567.1	471.9	519.5	P	P
263446_at	AT2G31650	12	4	4	4		NC	NC	I	NC	NC	NC	NC	NC	263446_at	274.3	345.9	310.1	P	P	0.023926	0.018555	485.1	352.9	419	P	P	0.023926	0.023926	0.7	0.3	0.2	0	0.3	0.294392	I	NC	NC	NC	1	0.2	-0.2	NC	NC	307.1	325.6	316.35	P	P
263488_at	AT2G31840	12	4	4	4	I	NC	NC	I	NC	NC	NC	NC	NC	263488_at	800.1	1078.5	939.3	P	P	0.000244	0.000732	1712.8	1157.7	1435.25	P	P	0.000732	0.000244	0.8	0.7	0.6	0.4	0.625	0.170783	I	I	I	I	4	0.2	-0.3	NC	NC	1002.7	915.3	959	P	P
263471_at	AT2G31890	12	4	4	4		NC	NC	I	NC	NC	NC	NC	NC	263471_at	1111	1128.8	1119.9	P	P	0.001953	0.00293	1936.7	1464.6	1700.65	P	P	0.001953	0.000732	0.6	0.4	0.4	0.2	0.4	0.163299	I	I	I	NC	3	0.2	-0.2	NC	NC	1630.8	1348.1	1489.45	P	P
265678_at	AT2G31970	12	4	4	4	NC	NC	NC	I	NC	NC	NC	NC	NC	265678_at	366.4	294.4	330.4	P	P	0.000244	0.000244	611.8	408.9	510.35	P	P	0.000244	0.000732	0.4	0.3	0.2	0.4	0.325	0.0957427	NC	NC	NC	NC	4	0.1	-0.3	NC	NC	337.6	326.3	331.95	P	P
265724_at	AT2G32100	12	4	4	4			NC		NC	NC	D	NC	NC	265724_at	555.2	444.9	500.05	P	P	0.000244	0.000244	756.2	431	593.6	P	P	0.000732	0.000732	0.3	0.3	-0.2	-0.4	-1.38778e-17	0.355903	NC	NC	NC	D	3	-0.2	-0.5	NC	D	672	511.4	591.7	P	P
265697_at	AT2G32170	12	4	4	4	NC	NC	NC	I	NC	NC	NC	NC	NC	265697_at	1026.5	1291	1158.75	P	P	0.000244	0.000732	1485.4	1126	1305.7	P	P	0.000732	0.000732	0.3	0.1	-0.1	-0.3	1.38778e-17	0.258199	NC	NC	NC	NC	4	0.2	-0.3	NC	NC	996.1	1008.9	1002.5	P	P
265670_s_at	AT2G32210	12	4	4	4			NC				I	NC	NC	265670_s_at	640.8	673.3	657.05	P	P	0.000244	0.000244	458.8	704.3	581.55	P	P	0.000244	0.000244	-0.5	-0.4	0.1	0.3	-0.125	0.386221	D	NC	NC	NC	1	-0.1	0.5	NC	I	702.4	541.5	621.95	P	P
266334_at	AT2G32380	12	4	4	4		NC	NC	D	NC	NC	NC	NC	NC	266334_at	1660.2	1451.9	1556.05	P	P	0.000244	0.000244	1406	1453.2	1429.6	P	P	0.000244	0.000244	-0.5	-0.2	-0.2	0.1	-0.2	0.244949	D	NC	NC	NC	1	-0.2	0.3	NC	NC	1788.7	1602.9	1695.8	P	P
267059_at	AT2G32520	12	4	4	4			NC	D	NC	NC		NC	NC	267059_at	4291.6	4339.4	4315.5	P	P	0.000244	0.000244	3025.4	3937.9	3481.65	P	P	0.000244	0.000244	-0.5	-0.5	-0.2	-0.2	-0.35	0.173205	D	D	NC	NC	2	0	0.3	NC	I	5834.6	5100.8	5467.7	P	P
267549_at	AT2G32640	12	4	4	4		NC	NC	I	NC	NC		NC	NC	267549_at	399.4	527.6	463.5	P	P	0.00293	0.00415	535.2	404	469.6	P	P	0.00293	0.001953	0.6	0.3	0.3	0	0.3	0.244949	I	MI	NC	NC	1	0.3	-0.3	NC	NC	328.5	335.8	332.15	P	P
267553_s_at	AT2G32650;AT2G32180	12	4	4	4	NC	NC	NC	I	NC	NC		NC	NC	267553_s_at	3597.7	3280.4	3439.05	P	P	0.000244	0.000244	3302.3	4176.5	3739.4	P	P	0.000732	0.000244	0.1	0.2	0.2	0.3	0.2	0.0816497	NC	NC	NC	NC	4	-0.1	0.1	NC	NC	4224.4	3909.4	4066.9	P	P
267645_at	AT2G32860	12	4	4	4	I	NC		I	NC	NC		NC	NC	267645_at	361.1	697	529.05	P	P	0.000244	0.000244	1047	880.6	963.8	P	P	0.000244	0.000244	1	0.6	1	0.3	0.725	0.340343	I	I	I	I	4	0.4	-0.3	I	NC	558.9	583.1	571	P	P
267642_at	AT2G32910	12	4	4	4	NC	NC	NC	I	NC	NC	NC	NC	NC	267642_at	1132.6	1033.1	1082.85	P	P	0.000244	0.000244	1282.4	1193	1237.7	P	P	0.000244	0.000244	0.2	0.3	0.2	0.2	0.225	0.05	NC	NC	NC	NC	4	-0.1	-0.1	NC	NC	989.5	1151.3	1070.4	P	P
245168_at	AT2G33150	12	4	4	4	D	NC	NC	D	NC	NC			NC	245168_at	19002.8	15465.1	17234	P	P	0.000244	0.000244	12115.3	13112	12613.6	P	P	0.000244	0.000244	-0.6	-0.3	-0.6	-0.3	-0.45	0.173205	D	D	D	D	4	-0.2	0.1	NC	NC	15225.6	21063.5	18144.5	P	P
255788_at	AT2G33310	12	4	4	4		NC	NC	I	NC	NC	NC	NC	NC	255788_at	1711.4	1650.3	1680.85	P	P	0.000732	0.000244	2227.2	1988.6	2107.9	P	P	0.000244	0.000244	0.5	0.5	0.4	0.3	0.425	0.0957427	I	I	MI	NC	2	0	-0.1	NC	NC	1361.6	1534.8	1448.2	P	P
256724_at	AT2G34040	12	4	4	4	NC	NC	NC	I	NC	NC	NC	NC	NC	256724_at	628.1	878.7	753.4	P	P	0.005859	0.00293	774.2	722.4	748.3	P	P	0.00415	0.001953	0.1	-0.1	0.2	-0.1	0.025	0.15	NC	NC	NC	NC	4	0.2	0	NC	NC	598.1	623.2	610.65	P	P
256725_at	AT2G34070	12	4	4	4	D	NC	NC					NC	NC	256725_at	2141.7	2808.1	2474.9	P	P	0.000244	0.000244	1344.1	1493.1	1418.6	P	P	0.000244	0.000244	-0.7	-0.8	-0.6	-0.7	-0.7	0.0816497	D	D	D	D	4	0.2	0.1	NC	NC	2222.1	2729.2	2475.65	P	P
266996_at	AT2G34490	12	4	4	4						NC	I	NC	NC	266996_at	2287.9	1899.9	2093.9	P	P	0.000244	0.000244	1473.6	1702.2	1587.9	P	P	0.000244	0.000244	-0.6	-0.3	-0.4	0	-0.325	0.25	D	NC	NC	NC	1	-0.3	0.2	D	MI	2177.5	2174.6	2176.05	P	P
266906_at	AT2G34585	12	4	4	4			NC	D	NC	NC	NC	NC	NC	266906_at	4504.9	3652.6	4078.75	P	P	0.000244	0.000244	2817.3	4012.4	3414.85	P	P	0.000244	0.000244	-0.6	-0.3	-0.2	0	-0.275	0.25	D	D	NC	NC	2	-0.1	0.4	NC	I	4290.9	4243	4266.95	P	P
266901_at	AT2G34600	6	2	3	1	D	NC	NC		NC	NC			NC	266901_at	186.6	187.3	186.95	P	P	0.018555	0.01416	102.6	72.5	87.55	A	A	0.533936	0.171387	-0.6	-0.7	-1.4	-1.2	-0.975	0.386221	D	D	D	D	4	0.3	-0.6	NC	NC	172	139.3	155.65	P	P
266899_at	AT2G34620	12	4	4	4		NC	NC	NC	NC	NC	D	NC	NC	266899_at	1742.3	2170.3	1956.3	P	P	0.000244	0.000244	2572.7	2480.2	2526.45	P	P	0.000244	0.000244	0.7	0.3	0.6	0.2	0.45	0.238048	I	I	I	NC	3	0.4	-0.2	NC	NC	2086.6	2167.7	2127.15	P	P
266957_at	AT2G34640	12	4	4	4		NC		I	NC	NC	NC	NC	NC	266957_at	915.2	1136	1025.6	P	P	0.000244	0.000244	1468.2	1233.5	1350.85	P	P	0.000244	0.000244	0.7	0.4	0.4	0.2	0.425	0.206155	I	I	I	NC	3	0.2	-0.2	I	NC	978.3	1124.7	1051.5	P	P
267310_at	AT2G34680	12	4	4	4		NC	NC	I	NC	NC		NC	NC	267310_at	1093	1472.9	1282.95	P	P	0.000244	0.000244	1398.9	1671.9	1535.4	P	P	0.000244	0.000732	0.4	0.2	0.3	0.1	0.25	0.129099	I	NC	I	NC	2	0.2	-0.1	NC	NC	1008.8	1191.8	1100.3	P	P
267425_at	AT2G34810	12	4	4	4	NC	NC	NC	NC		NC	I	NC	NC	267425_at	445	428.2	436.6	P	P	0.000732	0.000244	508.3	491.2	499.75	P	P	0.000244	0.000244	0.1	0.2	0	0.2	0.125	0.0957427	NC	NC	NC	NC	4	-0.1	-0.1	NC	NC	410.8	506.6	458.7	P	P
266621_at	AT2G35450	12	4	4	4	NC	NC	NC	I	NC	NC	NC	NC	NC	266621_at	998.7	983.5	991.1	P	P	0.001953	0.001221	1066.6	1169.7	1118.15	P	P	0.001953	0.001953	0.2	0.1	0.1	0.1	0.125	0.05	NC	NC	NC	NC	4	0.1	-0.1	NC	NC	1300.8	1028.4	1164.6	P	P
263943_at	AT2G35800	12	4	4	4		NC	NC	I	NC	NC		NC	NC	263943_at	797.7	721.1	759.4	P	P	0.000244	0.000244	1020.2	1119.2	1069.7	P	P	0.000244	0.000244	0.4	0.5	0.3	0.2	0.35	0.129099	I	I	NC	NC	2	0.2	-0.2	NC	NC	724.4	806	765.2	P	P
263955_at	AT2G36010	12	4	4	4	I	NC	NC	I		NC	I	NC	NC	263955_at	315.9	326.9	321.4	P	P	0.018555	0.01416	2452.7	2537.3	2495	P	P	0.000244	0.000244	3	3.1	3.1	3.2	3.1	0.0816497	I	I	I	I	4	-0.1	0.1	NC	NC	276.7	286.4	281.55	P	P
263939_at	AT2G36070	12	4	4	4		NC		I	NC	NC	NC	NC	NC	263939_at	618.6	834.7	726.65	P	P	0.000244	0.000244	980.3	808.7	894.5	P	P	0.000244	0.000244	0.6	0.2	0.4	0	0.3	0.258199	I	NC	I	NC	2	0.5	-0.1	I	NC	626.5	642.7	634.6	P	P
263931_at	AT2G36220	11	4	3	4		NC	NC	D	NC	NC		NC	NC	263931_at	476.7	405.3	441	P	P	0.000244	0.000732	229.9	230.7	230.3	P	P	0.001221	0.00293	-0.5	-0.8	-0.5	-0.6	-0.6	0.141421	NC	D	D	D	1	0	0.1	NC	NC	415.9	386.8	401.35	P	P
263902_at	AT2G36230	12	4	4	4		NC	NC	I	NC	NC	NC	NC	NC	263902_at	518.6	744	631.3	P	P	0.00415	0.001953	669.2	603	636.1	P	P	0.000244	0.000244	0.5	0.1	0.3	0.1	0.25	0.191485	NC	NC	I	NC	3	0.3	0.1	NC	NC	526.3	393.2	459.75	P	P
263900_at	AT2G36290	12	4	4	4	NC	NC	NC	D	NC	NC	NC	NC	NC	263900_at	2746.3	2955.3	2850.8	P	P	0.000244	0.000244	2745.6	3113.8	2929.7	P	P	0.000244	0.000244	-0.1	-0.1	0.1	0.1	0	0.11547	NC	NC	NC	NC	4	0	0.2	NC	NC	3019.5	3344.1	3181.8	P	P
265210_at	AT2G36620	12	4	4	4	NC	NC	NC		NC	NC	D	NC	NC	265210_at	9417	10826.2	10121.6	P	P	0.000244	0.000244	11291.8	11060.6	11176.2	P	P	0.000244	0.000244	0.2	0	0.2	0	0.1	0.11547	NC	NC	NC	NC	4	0.2	-0.1	NC	NC	10696.6	12115.5	11406	P	P
265225_at	AT2G36720	12	4	4	4		NC	NC	I	NC	NC	NC	NC	NC	265225_at	549.3	576.7	563	P	P	0.000244	0.000244	742.7	614.5	678.6	P	P	0.000244	0.000244	0.5	0.4	-0.1	-0.1	0.175	0.320156	I	NC	NC	NC	1	0.1	-0.4	NC	NC	507.1	559.2	533.15	P	P
265200_s_at	AT2G36790	12	4	4	4	D	NC	NC		NC	NC	NC	NC	NC	265200_s_at	437.1	520.3	478.7	P	P	0.000732	0.000732	269.2	273.1	271.15	P	P	0.00415	0.005859	-0.6	-1	-0.6	-1	-0.8	0.23094	D	D	D	D	4	0.4	-0.1	NC	NC	497.4	516	506.7	P	P
263838_at	AT2G36880	12	4	4	4		NC	NC	D	NC	NC	NC	NC	NC	263838_at	19219	16967.3	18093.2	P	P	0.000244	0.000244	15176.7	16720.2	15948.5	P	P	0.000244	0.000244	-0.3	-0.2	-0.2	0	-0.175	0.125831	D	NC	NC	NC	1	-0.2	0.1	NC	NC	18064.1	19228.2	18646.2	P	P
265467_at	AT2G37050	12	4	4	4		NC	NC	I	NC	NC	NC	NC	NC	265467_at	300.4	410.1	355.25	P	P	0.023926	0.037598	462.5	496.9	479.7	P	P	0.01416	0.010742	0.4	0.3	0.2	0.1	0.25	0.129099	MI	NC	NC	NC	1	0.2	-0.4	NC	NC	332.6	386.7	359.65	P	P
265464_at	AT2G37080	9	2	3	4		NC	NC	I	NC	NC	NC	NC	NC	265464_at	109	221	165	A	A	0.171387	0.129639	282.6	178	230.3	P	P	0.023926	0.037598	0.8	0.7	0.7	0.4	0.65	0.173205	I	I	I	NC	3	0.1	-0.4	NC	NC	173.4	205.4	189.4	A	P
265446_at	AT2G37110	12	4	4	4		NC	NC	D	NC	NC	NC	NC	NC	265446_at	5393.8	4774.2	5084	P	P	0.000244	0.000244	3962.8	4096.9	4029.85	P	P	0.000244	0.000244	-0.5	-0.3	-0.3	-0.2	-0.325	0.125831	D	D	NC	NC	2	-0.2	0.2	NC	NC	5451.4	6112.6	5782	P	P
266004_at	AT2G37330	12	4	4	4		NC	NC	D	NC	NC	NC	NC	NC	266004_at	632.6	643.2	637.9	P	P	0.000732	0.000244	478.5	432	455.25	P	P	0.008057	0.001221	-0.7	-0.8	-0.4	-0.3	-0.55	0.238048	D	D	NC	NC	2	0	0.1	NC	NC	640	772.1	706.05	P	P
265961_at	AT2G37400	12	4	4	4	I	NC	NC		NC	NC	NC	NC	NC	265961_at	786.4	719.4	752.9	P	P	0.018555	0.008057	936.6	1032.4	984.5	P	P	0.00415	0.000732	0.7	0.3	0.6	0.4	0.5	0.182574	I	I	I	I	4	0.5	0.1	NC	NC	826.2	697.6	761.9	P	P
265967_at	AT2G37450	9	2	3	4	I	NC	NC	I		NC	NC	NC	NC	265967_at	521.6	670.3	595.95	A	A	0.129639	0.129639	1235.1	922.3	1078.7	P	P	0.030273	0.046143	1	0.8	0.7	0.4	0.725	0.25	I	I	I	I	4	0.2	-0.3	NC	NC	830.2	706.8	768.5	P	M
267157_at	AT2G37630	12	4	4	4	I	NC	NC	I	NC	NC	NC	NC	NC	267157_at	721.4	887.3	804.35	P	P	0.000732	0.00293	1420.1	1361.8	1390.95	P	P	0.000732	0.000732	1	0.6	0.7	0.4	0.675	0.25	I	I	I	I	4	0.2	-0.2	NC	NC	761.6	769.6	765.6	P	P
267165_at	AT2G37710	12	4	4	4		NC	NC	D		NC	I	NC	NC	267165_at	1938.5	1831.2	1884.85	P	P	0.000244	0.000732	1563.6	1643.1	1603.35	P	P	0.000732	0.000732	-0.3	-0.2	-0.3	-0.1	-0.225	0.0957427	D	NC	MD	NC	1	-0.2	0	NC	NC	1850.8	1950.5	1900.65	P	P
267178_at	AT2G37750	12	4	4	4						NC	I	NC	NC	267178_at	2678.4	2033	2355.7	P	P	0.001953	0.00293	2392.7	2601.8	2497.25	P	P	0.00293	0.000732	-0.2	0.2	0	0.4	0.1	0.258199	NC	NC	NC	I	3	-0.4	0.4	D	I	2960.6	2438.5	2699.55	P	P
266079_at	AT2G37860	12	4	4	4		NC	NC	I	NC	NC	NC	NC	NC	266079_at	1588	1869.1	1728.55	P	P	0.000732	0.000732	1881.4	2051.5	1966.45	P	P	0.000732	0.000732	0.3	0.1	0.3	0.1	0.2	0.11547	NC	NC	I	NC	3	0.1	0	NC	NC	1602.5	1758.8	1680.65	P	P
266099_at	AT2G38040	12	4	4	4	NC	NC	NC	I	NC	NC	NC	NC	NC	266099_at	1745.4	1614.7	1680.05	P	P	0.000244	0.000244	1994.6	1624.6	1809.6	P	P	0.000244	0.000244	0.2	0.3	0.1	0.1	0.175	0.0957427	NC	NC	NC	NC	4	0	-0.2	NC	NC	1586.2	1678.3	1632.25	P	P
267088_at	AT2G38140	12	4	4	4	NC	NC	NC			NC	D	NC	NC	267088_at	8538.4	7862.9	8200.65	P	P	0.000244	0.000244	7492.9	7201.6	7347.25	P	P	0.000244	0.000244	-0.1	-0.1	-0.1	0	-0.075	0.05	NC	NC	NC	NC	4	-0.1	0	NC	NC	8478.7	7634.1	8056.4	P	P
267142_at	AT2G38290	12	4	4	4		NC	NC	D	NC	NC	NC	NC	NC	267142_at	1451.2	1323.2	1387.2	P	P	0.000244	0.001221	1352.4	970.8	1161.6	P	P	0.00415	0.001953	-0.3	-0.2	-0.7	-0.5	-0.425	0.221736	D	NC	D	NC	2	-0.2	-0.1	NC	NC	1253.3	1394.5	1323.9	P	P
267053_s_at	AT2G38390;AT2G38380	12	4	4	4		NC	NC	D	NC	NC	NC	NC	NC	267053_s_at	17548.8	14750.9	16149.9	P	P	0.000244	0.000244	12527.5	15475.2	14001.4	P	P	0.000244	0.000244	-0.3	-0.1	-0.1	0.1	-0.1	0.163299	D	NC	NC	NC	1	-0.2	0.2	NC	NC	15085.9	16738.9	15912.4	P	P
267028_at	AT2G38470	12	4	4	4	D	NC	NC			NC	NC	NC	NC	267028_at	1135.1	977.1	1056.1	P	P	0.001953	0.001953	770.4	830.6	800.5	P	P	0.00415	0.00293	-0.4	-0.4	-0.5	-0.4	-0.425	0.05	D	D	D	D	4	-0.1	-0.2	NC	NC	1190.5	1250.3	1220.4	P	P
266415_at	AT2G38530	12	4	4	4	D	NC	NC	D		NC	I	NC	NC	266415_at	16541.2	14443.8	15492.5	P	P	0.000244	0.000244	5402.6	5348.3	5375.45	P	P	0.000732	0.000732	-1.8	-1.6	-1.8	-1.7	-1.725	0.0957427	D	D	D	D	4	-0.2	-0.1	NC	NC	15732.6	15506.8	15619.7	P	P
266422_at	AT2G38650	12	4	4	4		NC	NC	I	NC	NC	NC	NC	NC	266422_at	912.2	1045.8	979	P	P	0.000732	0.000732	1205	1064.4	1134.7	P	P	0.000732	0.000244	0.4	0.2	0.2	-0.1	0.175	0.206155	I	NC	NC	NC	1	0.2	-0.3	NC	NC	940.8	976.7	958.75	P	P
266416_at	AT2G38710	12	4	4	4	NC	NC	NC	D	NC	NC	NC	NC	NC	266416_at	3940.4	3889	3914.7	P	P	0.000244	0.000244	3124	3582.4	3353.2	P	P	0.000244	0.000244	-0.2	-0.2	0	-0.1	-0.125	0.0957427	NC	NC	NC	NC	4	0	0.1	NC	NC	4017.3	4476.6	4246.95	P	P
266418_at	AT2G38750	12	4	4	4	NC	NC	NC	NC	NC	NC	I	NC	NC	266418_at	982.7	944.2	963.45	P	P	0.000244	0.000244	1047.3	871.1	959.2	P	P	0.000244	0.000244	0	0.2	0	0	0.05	0.1	NC	NC	NC	NC	4	0.1	0	NC	NC	975.5	1038.1	1006.8	P	P
266402_at	AT2G38780	12	4	4	4		NC		I	NC	NC	NC	NC	NC	266402_at	986.3	969	977.65	P	P	0.001221	0.000244	1283.9	1095.7	1189.8	P	P	0.000244	0.000244	0.8	0.4	0.3	0	0.375	0.330404	I	I	NC	NC	2	0.4	-0.4	I	NC	1012.7	894.9	953.8	P	P
266168_at	AT2G38870	12	4	4	4		NC	NC			NC	I	NC	NC	266168_at	5580	4905.5	5242.75	P	P	0.000244	0.000244	3817.8	4593	4205.4	P	P	0.000244	0.000244	-0.5	-0.3	-0.4	0	-0.3	0.216025	D	D	NC	NC	2	-0.3	0.2	NC	NC	6248.1	5920.6	6084.35	P	P
266184_s_at	AT2G38940	12	4	4	4			NC	D	NC	NC		NC	NC	266184_s_at	1872.8	1965.4	1919.1	P	P	0.000244	0.000244	1811.6	2350.3	2080.95	P	P	0.000244	0.000244	-0.1	-0.1	0.2	0.4	0.1	0.244949	NC	NC	NC	I	3	-0.1	0.5	NC	I	2103.2	2145.3	2124.25	P	P
266993_at	AT2G39210	12	4	4	4	NC	NC	NC		NC	NC	I	NC	NC	266993_at	535.8	512.2	524	P	P	0.005859	0.008057	437.9	418.5	428.2	P	P	0.010742	0.005859	-0.3	-0.1	-0.3	-0.3	-0.25	0.1	NC	NC	NC	NC	4	-0.2	0	NC	NC	599.2	533.2	566.2	P	P
266988_at	AT2G39310	12	4	4	4	NC		NC			NC	I	NC	NC	266988_at	12778.4	10364.9	11571.6	P	P	0.000244	0.000244	11435	13044.8	12239.9	P	P	0.000244	0.000244	-0.2	0	0.1	0.2	0.025	0.170783	NC	NC	NC	NC	4	-0.2	0.2	NC	I	11417	10448.9	10933	P	P
266977_at	AT2G39420	12	4	4	4		NC	NC	NC	NC	NC	I	NC	NC	266977_at	344	371.6	357.8	P	P	0.000732	0.000244	485.8	457.2	471.5	P	P	0.000244	0.000244	0.5	0.5	0.4	0.3	0.425	0.0957427	I	NC	NC	NC	1	0	-0.1	NC	NC	390.9	373	381.95	P	P
266965_at	AT2G39510	11	4	4	3	I	NC	NC		NC	NC	D	NC	NC	266965_at	579.7	631	605.35	P	P	0.001953	0.010742	552.9	658.1	605.5	P	P	0.000732	0.001221	0.4	0.4	0.3	0.2	0.325	0.0957427	I	I	I	I	4	0.4	0.1	NC	NC	521.6	366.7	444.15	P	P
266971_at	AT2G39580	8	2	2	4		NC	NC	I	NC	NC	NC	NC	NC	266971_at	208.2	361.8	285	A	P	0.219482	0.037598	502.1	254.3	378.2	A	P	0.080566	0.046143	0.8	0.6	0.2	-0.3	0.325	0.485627	I	NC	NC	NC	1	0.5	-0.7	NC	NC	163.5	177.5	170.5	A	A
267624_at	AT2G39660	12	4	4	4	D	NC	NC		NC	NC		NC	NC	267624_at	1965.5	1965.4	1965.45	P	P	0.000244	0.000244	1240.5	1331.5	1286	P	P	0.000244	0.000244	-0.6	-0.6	-0.5	-0.6	-0.575	0.05	D	D	D	D	4	0.1	0.1	NC	NC	1776.3	2079.7	1928	P	P
267562_at	AT2G39670	12	4	4	4		NC	NC	I	NC	NC		NC	NC	267562_at	1107	1101.9	1104.45	P	P	0.001221	0.001953	1360.6	1401.6	1381.1	P	P	0.001953	0.000732	0.4	0.2	0.3	0.2	0.275	0.0957427	NC	NC	I	NC	3	0.1	0	NC	NC	1057.9	1300.4	1179.15	P	P
267591_at	AT2G39705	12	4	4	4	D	NC	NC		NC		NC		NC	267591_at	877.2	788.8	833	P	P	0.000732	0.000244	510.6	496.9	503.75	P	P	0.000244	0.000244	-0.7	-0.5	-0.8	-0.5	-0.625	0.15	D	D	D	D	4	-0.3	-0.2	NC	NC	1014.3	509.6	761.95	P	P
245067_at	AT2G39780	12	4	4	4			NC	D	NC	NC	NC	NC	NC	245067_at	8923.7	8594.5	8759.1	P	P	0.000244	0.000244	6756	7768.9	7262.45	P	P	0.000244	0.000244	-0.3	-0.3	-0.1	0	-0.175	0.15	D	D	NC	NC	2	-0.1	0.2	NC	I	9095.4	9240.1	9167.75	P	P
251775_s_at	AT2G39800;AT3G55610	12	4	4	4	NC	NC	NC			NC	I	NC	NC	251775_s_at	2401.3	2682.4	2541.85	P	P	0.000244	0.000244	2615.4	2584.4	2599.9	P	P	0.000244	0.000244	0.2	0.1	0.3	0.1	0.175	0.0957427	NC	NC	NC	NC	4	0.2	0.1	NC	NC	2314.1	2845.5	2579.8	P	P
245088_at	AT2G39850	10	3	3	4		NC	NC	I	NC	NC	NC		NC	245088_at	197.8	338.6	268.2	A	P	0.111572	0.030273	607.8	368.8	488.3	P	P	0.00415	0.005859	1	0.6	0.4	0.3	0.575	0.30957	I	I	I	NC	3	0.2	-0.4	NC	NC	228.1	203.5	215.8	P	A
267337_at	AT2G39980	12	4	4	4	D	NC	NC	NC	NC	NC	NC	NC	NC	267337_at	678.9	532.9	605.9	P	P	0.005859	0.00293	369.6	367.2	368.4	P	P	0.010742	0.00415	-1.1	-0.8	-0.8	-0.9	-0.9	0.141421	D	D	D	D	4	0	0.3	NC	NC	698.2	552.2	625.2	P	P
267357_at	AT2G40000	11	4	4	3	D	NC	NC	D	NC	NC		NC		267357_at	1073.9	987.7	1030.8	P	P	0.001953	0.000732	311.5	270.7	291.1	P	P	0.00293	0.008057	-1.6	-1.6	-2	-2	-1.8	0.23094	D	D	D	D	4	0	-0.5	NC	NC	971.7	996.7	984.2	P	P
263379_at	AT2G40140	12	4	4	4	D	NC	NC	D	NC	NC	NC	NC	NC	263379_at	1485.8	1366.1	1425.95	P	P	0.000244	0.000244	771.8	841.2	806.5	P	P	0.000244	0.000244	-0.6	-0.6	-0.6	-0.4	-0.55	0.1	D	D	D	D	4	-0.2	0.2	NC	NC	1214.1	1337.4	1275.75	P	P
263804_at	AT2G40270	12	4	4	4	NC	NC	NC		NC	NC	I	NC	NC	263804_at	626.2	654.5	640.35	P	P	0.001221	0.000732	693.6	679.2	686.4	P	P	0.000244	0.000244	0.2	0.4	-0.1	0.2	0.175	0.206155	NC	NC	NC	NC	4	-0.2	-0.1	NC	NC	807.8	697.9	752.85	P	P
263831_at	AT2G40300	12	4	4	4	D	NC	NC	NC	NC	NC	NC	NC	NC	263831_at	3340	3209.1	3274.55	P	P	0.000244	0.000244	2246.7	2600.3	2423.5	P	P	0.000244	0.000244	-0.5	-0.6	-0.6	-0.6	-0.575	0.05	D	D	D	D	4	0	0	NC	NC	2976.7	3067.4	3022.05	P	P
263836_at	AT2G40330	12	4	4	4	D	NC	NC	D	NC	NC	NC	NC	NC	263836_at	1752.2	1591.8	1672	P	P	0.000732	0.000732	1022.8	987.6	1005.2	P	P	0.008057	0.00293	-1.2	-0.8	-0.8	-0.5	-0.825	0.287228	D	D	D	D	4	-0.3	0.3	NC	NC	1697.7	1503.4	1600.55	P	P
263824_at	AT2G40360	12	4	4	4		NC		I	NC	NC		NC	NC	263824_at	2199.9	3212.3	2706.1	P	P	0.000244	0.000244	4004.8	3176.5	3590.65	P	P	0.000244	0.000244	0.7	0.4	0.5	0.1	0.425	0.25	I	I	I	NC	3	0.4	-0.3	I	NC	2399.8	2734.9	2567.35	P	P
263805_at	AT2G40400	12	4	4	4	NC		NC	I	NC	NC	D	NC	NC	263805_at	1294.4	1363	1328.7	P	P	0.000244	0.000244	1429.9	1196	1312.95	P	P	0.000244	0.000244	0.2	0.1	-0.1	-0.2	6.93889e-18	0.182574	NC	NC	NC	NC	4	0.1	-0.3	NC	D	1142.8	1303	1222.9	P	P
263802_at	AT2G40430	12	4	4	4		NC	NC	I	NC	NC		NC	NC	263802_at	1470.5	1468.2	1469.35	P	P	0.001221	0.000244	2098.4	1669	1883.7	P	P	0.000244	0.000244	0.4	0.2	0	0	0.15	0.191485	I	NC	NC	NC	1	0	-0.2	NC	NC	1384.5	1418.9	1401.7	P	P
255877_at	AT2G40460	12	4	4	4		NC	NC	NC	NC	NC	I	NC	NC	255877_at	413.6	500.7	457.15	P	P	0.000244	0.000244	811.9	623	717.45	P	P	0.000244	0.000244	0.6	0.4	0.4	0.1	0.375	0.206155	I	NC	NC	NC	1	0.1	-0.4	NC	NC	518.2	542.2	530.2	P	P
255876_at	AT2G40480	12	4	4	4		NC	NC	I	NC	NC	NC	NC	NC	255876_at	352.7	415.1	383.9	P	P	0.001953	0.01416	573.3	434.8	504.05	P	P	0.037598	0.000244	0.8	0.5	0.8	0.4	0.625	0.206155	I	NC	I	I	3	0.4	-0.1	NC	NC	289.8	313.4	301.6	P	P
255822_at	AT2G40610	12	4	4	4	I	NC	NC				D		NC	255822_at	807.6	884	845.8	P	P	0.000244	0.000732	2080.3	1513	1796.65	P	P	0.000244	0.000244	1.2	1.2	1	0.8	1.05	0.191485	I	I	I	I	4	0.1	-0.4	NC	NC	960.1	691.5	825.8	P	P
266057_at	AT2G40660	12	4	4	4	NC	NC	NC	I	NC	NC	NC	NC	NC	266057_at	1513.6	1863.7	1688.65	P	P	0.001953	0.000732	1894	1887.6	1890.8	P	P	0.001953	0.001953	0.2	0	0.2	0	0.1	0.11547	NC	NC	NC	NC	4	0.2	0	NC	NC	1572.4	1715.6	1644	P	P
266078_at	AT2G40670	12	4	4	4	NC	NC	NC			NC	I	NC	NC	266078_at	439.2	452.9	446.05	P	P	0.000244	0.000732	374	455.4	414.7	P	P	0.000732	0.000244	0.2	0	0.1	0	0.075	0.0957427	NC	NC	NC	NC	4	0.2	0.1	NC	NC	339.8	428.4	384.1	P	P
266076_at	AT2G40700	12	4	4	4	NC	NC	NC	I	NC	NC	NC	NC	NC	266076_at	348	352.3	350.15	P	P	0.010742	0.000732	352.8	379.7	366.25	P	P	0.000244	0.000244	0.3	0.1	0.1	0.2	0.175	0.0957427	NC	NC	NC	NC	4	0.2	0	NC	NC	296.9	272.7	284.8	P	P
257382_at	AT2G40750	4	1	0	3	I	NC	NC	NC	NC	NC		NC		257382_at	263.4	123.6	193.5	A	A	0.27417	0.398926	382.9	352.4	367.65	A	P	0.080566	0.046143	0.9	1.7	0.5	1.6	1.175	0.57373	I	I	I	I	4	-0.8	-0.3	NC	NC	181.2	73.2	127.2	A	A
267078_at	AT2G40960	12	4	4	4	NC	NC	NC	I	NC	NC	NC	NC	NC	267078_at	704.3	697.5	700.9	P	P	0.001221	0.001221	875.6	722.7	799.15	P	P	0.001221	0.001953	0.3	0.2	0.1	0.1	0.175	0.0957427	NC	NC	NC	NC	4	0	-0.2	NC	NC	505.4	646.4	575.9	P	P
267076_at	AT2G41090	12	4	4	4	NC	NC	NC	D	NC		I	NC	NC	267076_at	14783.7	12706.9	13745.3	P	P	0.000244	0.000244	13237	13794	13515.5	P	P	0.000244	0.000244	-0.1	0.1	-0.1	0.1	0	0.11547	NC	NC	NC	NC	4	-0.2	0	NC	NC	17199.8	13227.6	15213.7	P	P
266364_at	AT2G41230	11	4	4	3	D		NC	D	NC	NC	I	NC	NC	266364_at	2890.7	2617.1	2753.9	P	P	0.000244	0.000732	302	1078.8	690.4	P	P	0.018555	0.000732	-3	-2.6	-1.3	-1.1	-2	0.94163	D	D	D	D	4	-0.3	1.5	NC	I	2087.2	2753.8	2420.5	P	P
266423_at	AT2G41340	12	4	4	4	NC	NC	NC	I	NC	NC		NC	NC	266423_at	112.4	134.4	123.4	P	P	0.018555	0.005859	159	156.1	157.55	P	P	0.001953	0.008057	0.5	0.4	0.6	0.3	0.45	0.129099	NC	NC	NC	NC	4	0.2	0.1	NC	NC	105.9	107.1	106.5	P	P
266371_at	AT2G41410	12	4	4	4	D			D		NC	I	NC	NC	266371_at	15042.9	10888.2	12965.5	P	P	0.000244	0.000244	5987.5	7334.5	6661	P	P	0.000244	0.000244	-1.4	-0.9	-0.9	-0.4	-0.9	0.408248	D	D	D	D	4	-0.4	0.4	D	I	11147.2	14459.3	12803.2	P	P
245117_at	AT2G41560	12	4	4	4	NC	NC	NC	I		NC	D	NC	NC	245117_at	3075.9	2977	3026.45	P	P	0.000732	0.000732	3084.6	2917.8	3001.2	P	P	0.001221	0.000732	0.1	0.1	0	0	0.05	0.057735	NC	NC	NC	NC	4	0	0	NC	NC	2444.6	2513.4	2479	P	P
245106_at	AT2G41650	12	4	4	4	I	NC	NC		NC	NC	NC	NC	NC	245106_at	719.6	701.9	710.75	P	P	0.000244	0.000244	1102.5	980.8	1041.65	P	P	0.000244	0.000244	0.5	0.4	0.5	0.4	0.45	0.057735	I	I	I	I	4	0.1	0	NC	NC	934	835.9	884.95	P	P
245118_at	AT2G41680	12	4	4	4		NC		I	NC	NC		NC	NC	245118_at	2531.2	2838	2684.6	P	P	0.000244	0.000244	3730.4	3425.3	3577.85	P	P	0.000244	0.000244	0.6	0.3	0.4	0.2	0.375	0.170783	I	I	I	NC	3	0.2	-0.2	I	NC	2865.9	3166.7	3016.3	P	P
260523_at	AT2G41720	12	4	4	4	NC	NC	NC	I	NC	NC	NC	NC	NC	260523_at	787.3	934	860.65	P	P	0.000244	0.000244	1108.7	1089.1	1098.9	P	P	0.000244	0.000244	0.2	0.2	0.3	0.2	0.225	0.05	NC	NC	NC	NC	4	0.1	0	NC	NC	805.4	838.5	821.95	P	P
260494_at	AT2G41820	12	4	4	4	I	NC	NC	I	NC	NC	NC	NC	NC	260494_at	472.7	441.9	457.3	P	P	0.037598	0.023926	718	718.2	718.1	P	P	0.008057	0.008057	0.7	0.8	0.7	0.6	0.7	0.0816497	I	I	I	I	4	0	-0.2	NC	NC	534.8	435.5	485.15	P	P
267581_at	AT2G41980	12	4	4	4		NC	NC	I	NC	NC	NC	NC	NC	267581_at	176.2	338.3	257.25	P	P	0.008057	0.001953	487.3	393.9	440.6	P	P	0.000244	0.000732	0.7	0.3	1.1	0.2	0.575	0.411299	I	NC	I	NC	2	0.7	-0.2	NC	NC	338.5	306.9	322.7	P	P
267635_at	AT2G42220	12	4	4	4		NC	NC				D	NC	NC	267635_at	2758.1	3311.4	3034.75	P	P	0.000732	0.000244	4169.5	3888.1	4028.8	P	P	0.000244	0.000244	0.5	0.4	0.2	0.1	0.3	0.182574	I	I	I	NC	3	0.2	-0.2	NC	NC	4394.8	3395.6	3895.2	P	P
267626_at	AT2G42250	12	4	4	4	I	NC	NC		NC			NC		267626_at	499.2	614	556.6	P	P	0.008057	0.00293	993.3	795.9	894.6	P	P	0.001953	0.001221	1.2	0.6	0.8	0.4	0.75	0.341565	I	I	I	I	4	0.4	-0.2	NC	NC	434.5	288.7	361.6	P	P
265853_at	AT2G42360	5	2	2	1	D	NC	NC	D	NC				NC	265853_at	519.6	521.6	520.6	P	P	0.037598	0.023926	226.1	240.6	233.35	A	A	0.334473	0.219482	-0.9	-1	-0.9	-1	-0.95	0.057735	D	D	D	D	4	0	0	NC	NC	517.6	741.3	629.45	P	P
263495_at	AT2G42530	12	4	4	4	I	NC	NC	NC	NC	NC		NC	NC	263495_at	439.5	389	414.25	P	P	0.005859	0.018555	485.8	515.1	500.45	P	P	0.00293	0.000732	0.3	0.4	0.1	0.3	0.275	0.125831	I	I	I	I	4	-0.1	0.1	NC	NC	452	425.5	438.75	P	P
263491_at	AT2G42600	12	4	4	4	I	NC	NC	I		NC		NC	NC	263491_at	3922	3765.6	3843.8	P	P	0.000244	0.000244	5150.8	4807.3	4979.05	P	P	0.000244	0.000244	0.4	0.4	0.2	0.3	0.325	0.0957427	I	I	I	I	4	0	-0.2	NC	NC	3733.6	3824.5	3779.05	P	P
263986_at	AT2G42790	12	4	4	4		NC	NC			NC	I	NC	NC	263986_at	2611.4	2586.2	2598.8	P	P	0.000244	0.000244	1931	1900.3	1915.65	P	P	0.000244	0.000244	-0.4	-0.3	-0.5	-0.4	-0.4	0.0816497	D	D	D	NC	3	-0.1	-0.1	NC	NC	3098.4	3016.8	3057.6	P	P
263979_at	AT2G42840	12	4	4	4	I	NC	NC	I		NC	D	NC	NC	263979_at	3108.3	2724.2	2916.25	P	P	0.000244	0.000244	4024.9	3653.5	3839.2	P	P	0.000244	0.000244	0.6	0.6	0.5	0.5	0.55	0.057735	I	I	I	I	4	-0.1	-0.1	NC	NC	2896	3145.6	3020.8	P	P
265244_at	AT2G43020	12	4	4	4	NC	NC	NC			NC	I	NC	NC	265244_at	1225.5	1519.8	1372.65	P	P	0.001953	0.001953	1772.6	1764.1	1768.35	P	P	0.001953	0.001953	0.1	0.2	0	0.1	0.1	0.0816497	NC	NC	NC	NC	4	-0.1	0.2	NC	NC	1197.3	1707.9	1452.6	P	P
265247_at	AT2G43030	12	4	4	4	NC	NC	NC		NC	NC	D	NC	NC	265247_at	20042.4	19459.9	19751.2	P	P	0.000244	0.000244	20575.4	22538	21556.7	P	P	0.000244	0.000244	0	0.1	0	0	0.025	0.05	NC	NC	NC	NC	4	-0.1	0	NC	NC	20749.3	20515.2	20632.2	P	P
260541_at	AT2G43530	12	4	4	4	D	NC	NC			NC	I	NC		260541_at	9416.8	7767.5	8592.15	P	P	0.000244	0.000244	5432.3	6020.9	5726.6	P	P	0.000244	0.000244	-0.5	-0.4	-0.5	-0.4	-0.45	0.057735	D	D	D	D	4	-0.2	0	NC	NC	7634.9	8386.8	8010.85	P	P
260549_at	AT2G43535	12	4	4	4			NC	D	NC	NC	I	NC	NC	260549_at	12428.8	11607.6	12018.2	P	P	0.000244	0.000244	8138.3	13319.9	10729.1	P	P	0.000244	0.000244	-0.8	-0.6	-0.4	-0.1	-0.475	0.298608	D	D	NC	NC	2	-0.2	0.4	NC	I	11485.1	16548.8	14017	P	P
260542_at	AT2G43560	12	4	4	4		NC	NC		NC	NC	D	NC	NC	260542_at	3957.8	4146.7	4052.25	P	P	0.000244	0.000244	5198.9	4354.3	4776.6	P	P	0.000244	0.000244	0.4	0.4	0.2	0.2	0.3	0.11547	I	I	NC	NC	2	0	-0.2	NC	NC	4488.5	3906.8	4197.65	P	P
260567_at	AT2G43820	12	4	4	4	D	NC	NC	D	NC	NC			NC	260567_at	2457.2	2372.6	2414.9	P	P	0.000244	0.000244	1696.4	1682.2	1689.3	P	P	0.000244	0.000244	-0.6	-0.5	-0.6	-0.5	-0.55	0.057735	D	D	D	D	4	-0.1	0	NC	NC	2347.9	2473.8	2410.85	P	P
267214_at	AT2G43970	12	4	4	4	NC	NC	NC	I	NC	NC		NC	NC	267214_at	5107.4	5408.6	5258	P	P	0.000244	0.000244	5962.3	5861.8	5912.05	P	P	0.000244	0.000244	0.2	0.2	0.1	0.1	0.15	0.057735	NC	NC	NC	NC	4	0	-0.1	NC	NC	4735.5	4443.1	4589.3	P	P
267237_s_at	AT2G44040	12	4	4	4	NC	NC	NC		NC	NC	D	NC	NC	267237_s_at	893.7	1076.5	985.1	P	P	0.000732	0.000244	1301.2	1286.5	1293.85	P	P	0.000244	0.000732	0.3	0.3	0.1	0.2	0.225	0.0957427	NC	NC	NC	NC	4	-0.1	-0.1	NC	NC	1123.9	1146.1	1135	P	P
267230_at	AT2G44080	12	4	4	4	D		NC	D	NC	NC		NC	NC	267230_at	2998.9	2979.3	2989.1	P	P	0.000244	0.000244	1294.8	1697.6	1496.2	P	P	0.000244	0.000244	-1.1	-1	-0.7	-0.7	-0.875	0.206155	D	D	D	D	4	-0.1	0.4	NC	I	3124.2	2777.2	2950.7	P	P
267238_at	AT2G44130;AT2G44140	12	4	4	4	D	NC	NC	D	NC	NC	NC	NC	NC	267238_at	1163	1008.9	1085.95	P	P	0.001953	0.001953	860.7	593.9	727.3	P	P	0.01416	0.018555	-0.6	-0.5	-1.1	-0.8	-0.75	0.264575	D	D	D	D	4	-0.1	-0.4	NC	NC	1046.3	897.4	971.85	P	P
267366_at	AT2G44310	12	4	4	4				D	NC	NC	NC	NC	NC	267366_at	9586.1	7637.2	8611.65	P	P	0.000244	0.000244	6039.8	7233	6636.4	P	P	0.000244	0.000244	-0.7	-0.4	-0.4	-0.2	-0.425	0.206155	D	D	D	NC	3	-0.3	0.2	D	I	8909	9176.4	9042.7	P	P
267385_at	AT2G44380	12	4	4	4			NC		NC		I	NC	NC	267385_at	1234.8	997	1115.9	P	P	0.000244	0.000732	603.4	889.5	746.45	P	P	0.000244	0.000732	-0.5	-0.5	-0.1	0	-0.275	0.262996	D	D	NC	NC	2	-0.1	0.5	NC	I	1064.5	1040.9	1052.7	P	P
267391_at	AT2G44480	8	2	4	2	NC	NC	NC	NC	NC	NC	I	NC	NC	267391_at	276.5	270.3	273.4	P	M	0.018555	0.056152	221.5	170.1	195.8	A	P	0.129639	0.010742	-0.4	0	-0.8	-0.4	-0.4	0.326599	NC	NC	NC	NC	4	-0.2	-0.3	NC	NC	341.2	335.6	338.4	P	P
245138_at	AT2G45190	11	3	4	4		NC	NC	I	NC	NC	D	NC	NC	245138_at	364.7	416.1	390.4	A	P	0.111572	0.023926	694.8	503.4	599.1	P	P	0.046143	0.01416	1	0.7	0.6	0.3	0.65	0.288675	I	NC	I	NC	2	0.3	-0.4	NC	NC	309	318.9	313.95	P	P
245136_at	AT2G45210	12	4	4	4	D	NC	NC			NC	I	NC	NC	245136_at	848.2	595.9	722.05	P	P	0.00293	0.00293	468.6	299.3	383.95	P	P	0.008057	0.00293	-0.8	-0.6	-0.8	-0.5	-0.675	0.15	D	D	D	D	4	-0.2	0.1	NC	NC	874.1	748.6	811.35	P	P
245145_at	AT2G45440	12	4	4	4	NC	NC	NC	I	NC	NC	NC	NC	NC	245145_at	2148.8	2050.2	2099.5	P	P	0.000244	0.000244	2189.7	2304.8	2247.25	P	P	0.000244	0.000244	0.3	0.1	0.4	0.1	0.225	0.15	NC	NC	NC	NC	4	0.1	0	NC	NC	2266.8	2012.7	2139.75	P	P
251395_at	AT2G45470	12	4	4	4	I	NC	NC		NC	NC		NC	NC	251395_at	3810	3348.2	3579.1	P	P	0.000244	0.000244	5829.1	5890.1	5859.6	P	P	0.000244	0.000244	0.4	0.5	0.5	0.6	0.5	0.0816497	I	I	I	I	4	-0.1	0.2	NC	NC	4519	4230.5	4374.75	P	P
267500_s_at	AT2G45510;AT2G44890	12	4	4	4		NC	NC			NC	I	NC	NC	267500_s_at	837.1	876.2	856.65	P	P	0.000732	0.000732	663.2	657.1	660.15	P	P	0.00415	0.001953	-0.3	-0.3	-0.3	-0.3	-0.3	0	D	D	NC	NC	2	0	0	NC	NC	698.8	750.5	724.65	P	P
267509_at	AT2G45660	12	4	4	4	NC	NC	NC			NC	D	NC	NC	267509_at	310.8	344.4	327.6	P	P	0.000732	0.000732	426.2	321.4	373.8	P	P	0.000732	0.000244	0.2	0.1	0	0	0.075	0.0957427	NC	NC	NC	NC	4	0.2	-0.2	NC	NC	450	387.7	418.85	P	P
266867_at	AT2G45770	12	4	4	4		NC	NC	I	NC	NC		NC	NC	266867_at	610.9	772.1	691.5	P	P	0.000244	0.000244	759.8	679.4	719.6	P	P	0.000244	0.000244	0.5	0.1	0.2	0	0.2	0.216025	I	NC	NC	NC	1	0.3	-0.2	NC	NC	711.8	615.6	663.7	P	P
266922_s_at	AT2G45950	12	4	4	4	NC	NC	NC	I	NC	NC	NC	NC	NC	266922_s_at	1306.6	1313.9	1310.25	P	P	0.001221	0.000732	1568.8	1317.3	1443.05	P	P	0.000732	0.000732	0.3	0.1	0	0	0.1	0.141421	NC	NC	NC	NC	4	0.1	-0.2	NC	NC	1145.7	1061.2	1103.45	P	P
266552_at	AT2G46330	12	4	4	4		NC	NC	D	NC	NC		NC	NC	266552_at	17257.4	15491.7	16374.5	P	P	0.000244	0.000244	14663.6	14804.1	14733.9	P	P	0.000244	0.000244	-0.2	-0.1	-0.1	0	-0.1	0.0816497	D	NC	NC	NC	1	-0.1	0.1	NC	NC	14475.2	16001.2	15238.2	P	P
263779_at	AT2G46340	12	4	4	4		NC	NC	I	NC	NC	NC	NC	NC	263779_at	1554	1354.1	1454.05	P	P	0.001221	0.001953	1817.6	1341.1	1579.35	P	P	0.001953	0.000732	0.5	0.4	0.1	0.1	0.275	0.206155	I	NC	NC	NC	1	0	-0.4	NC	NC	1290.9	1280.9	1285.9	P	P
263785_at	AT2G46390	12	4	4	4			NC	D	NC	NC	NC	NC	NC	263785_at	3614.3	3223.3	3418.8	P	P	0.000244	0.000244	2467.1	3535.4	3001.25	P	P	0.000244	0.000244	-0.5	-0.4	-0.1	0.1	-0.225	0.275379	D	D	NC	NC	2	-0.2	0.4	NC	I	4206.4	3762.4	3984.4	P	P
263776_s_at	AT2G46430;AT2G46440	12	4	4	4	NC	NC	NC			NC	I	NC	NC	263776_s_at	879.9	613	746.45	P	P	0.000244	0.000732	766.3	700	733.15	P	P	0.000244	0.000244	-0.1	0	-0.3	0	-0.1	0.141421	NC	NC	NC	NC	4	-0.3	-0.1	NC	NC	792	1024.8	908.4	P	P
266719_at	AT2G46830	12	4	4	4			NC			NC	D	NC	NC	266719_at	435.4	571.9	503.65	P	P	0.008057	0.008057	1033.8	590.7	812.25	P	P	0.001221	0.008057	1.2	0.9	0.2	-0.1	0.55	0.602771	I	I	NC	NC	2	0.3	-1	NC	D	512.1	537.8	524.95	P	P
263320_at	AT2G47180	12	4	4	4	NC	NC	NC			NC	I	NC	NC	263320_at	695.5	682.9	689.2	P	P	0.001953	0.00415	810.2	751.4	780.8	P	P	0.010742	0.008057	0.1	0.2	0	0.3	0.15	0.129099	NC	NC	NC	NC	4	-0.2	-0.2	NC	NC	630	595	612.5	P	P
260524_at	AT2G47230	10	4	3	3		NC	NC	I	NC	NC	NC	NC	NC	260524_at	157.4	148.1	152.75	P	P	0.046143	0.023926	272.5	187.5	230	P	P	0.001953	0.00415	0.2	0.6	0.6	0.1	0.375	0.262996	NC	I	NC	NC	3	0.4	-0.5	NC	NC	156.3	130	143.15	P	A
260531_at	AT2G47240	12	4	4	4			NC	I	NC	NC	D	NC	NC	260531_at	331.2	277.5	304.35	P	P	0.00293	0.008057	541.5	498.3	519.9	P	P	0.000244	0.001221	1.1	0.7	0.2	0.2	0.55	0.43589	I	I	NC	NC	2	0.2	-0.6	NC	MD	313.8	343.8	328.8	P	P
260525_at	AT2G47250	12	4	4	4		NC	NC	I	NC	NC	NC	NC	NC	260525_at	1130.4	1020.3	1075.35	P	P	0.000732	0.000244	1268.9	966.3	1117.6	P	P	0.000732	0.000244	0.3	0.3	0	-0.1	0.125	0.206155	I	NC	NC	NC	1	0	-0.3	NC	NC	1027.6	957.9	992.75	P	P
260579_at	AT2G47380;AT2G47390	12	4	4	4			NC	D	NC	NC	NC	NC	NC	260579_at	18638.5	15495.2	17066.8	P	P	0.000244	0.000244	12509.5	14565.5	13537.5	P	P	0.000244	0.000244	-0.5	-0.3	-0.3	-0.1	-0.3	0.163299	D	D	NC	NC	2	-0.2	0.3	NC	I	18201.8	16300.5	17251.2	P	P
245174_at	AT2G47500	11	3	4	4		NC		I	NC	NC	NC	NC	NC	245174_at	291.1	315.4	303.25	M	P	0.056152	0.030273	434.2	387.7	410.95	P	P	0.008057	0.00293	0.8	0.3	0.6	0.2	0.475	0.275379	I	NC	I	NC	2	0.5	-0.1	I	NC	227.3	288.5	257.9	P	P
245151_at	AT2G47550	12	4	4	4			NC	D	NC	NC	NC	NC	NC	245151_at	428	292.7	360.35	P	P	0.000732	0.000244	208.2	332.7	270.45	P	P	0.000732	0.000244	-0.7	-0.7	-0.1	-0.1	-0.4	0.34641	D	D	NC	NC	2	-0.1	0.9	NC	I	334.3	394.2	364.25	P	P
245127_at	AT2G47600	12	4	4	4	NC	NC	NC	NC	NC		I	NC	NC	245127_at	1552.5	1540.1	1546.3	P	P	0.001953	0.001953	1566.6	1848.3	1707.45	P	P	0.001221	0.000732	0	0	0	0	0	0	NC	NC	NC	NC	4	-0.1	-0.1	NC	NC	1377.8	1936.6	1657.2	P	P
266485_at	AT2G47630	12	4	4	4	I	NC	NC		NC	NC	NC	NC	NC	266485_at	936.5	604.6	770.55	P	P	0.001953	0.000244	1213.3	1269.4	1241.35	P	P	0.000244	0.000244	0.5	0.4	0.3	0.4	0.4	0.0816497	I	I	I	I	4	-0.2	0.1	NC	NC	698.1	790.1	744.1	P	P
251234_s_at	AT2G47650	12	4	4	4			NC	D	NC	NC	NC	NC	NC	251234_s_at	4211.1	4132.2	4171.65	P	P	0.000244	0.000244	2675.2	3859.5	3267.35	P	P	0.000244	0.000244	-0.5	-0.5	-0.1	-0.1	-0.3	0.23094	D	D	NC	NC	2	0	0.4	NC	I	4321.9	4453.7	4387.8	P	P
266458_at	AT2G47710	12	4	4	4	NC	NC	NC	D	NC	NC	NC	NC	NC	266458_at	3922.6	3787.8	3855.2	P	P	0.000244	0.000244	3830.2	4145.2	3987.7	P	P	0.000244	0.000244	-0.1	0	-0.1	0	-0.05	0.057735	NC	NC	NC	NC	4	-0.1	0	NC	NC	3999.4	4552.5	4275.95	P	P
266516_at	AT2G47880	10	3	3	4	I	NC	NC	NC	NC	NC	NC	NC	NC	266516_at	359.3	609	484.15	A	P	0.080566	0.030273	865.4	482.2	673.8	P	P	0.00293	0.001221	1.3	0.7	0.6	0.4	0.75	0.387298	I	I	I	I	4	0.6	-0.3	NC	NC	533.6	517.4	525.5	P	P
266509_at	AT2G47940	12	4	4	4	NC	NC	NC	I	NC	NC	D	NC	NC	266509_at	3406.9	3826.6	3616.75	P	P	0.000244	0.000244	3683.5	4102.8	3893.15	P	P	0.000244	0.000244	0.1	0	0.1	0	0.05	0.057735	NC	NC	NC	NC	4	0.1	0	NC	NC	4056.4	3979.5	4017.95	P	P
265768_at	AT2G48020	12	4	4	4		NC	NC	NC	NC	NC	D	NC	NC	265768_at	2135.7	2292.7	2214.2	P	P	0.000244	0.000244	2025.2	1712.9	1869.05	P	P	0.000244	0.000244	-0.1	-0.1	-0.2	-0.4	-0.2	0.141421	NC	NC	NC	D	3	0	-0.3	NC	NC	1833.2	1910.3	1871.75	P	P
262316_at	AT2G48120	12	4	4	4	NC	NC	NC	I	NC	NC	NC	NC	NC	262316_at	797.5	822.2	809.85	P	P	0.000244	0.000244	1046.2	823.8	935	P	P	0.000244	0.000244	0.4	0.4	0.1	-0.1	0.2	0.244949	NC	NC	NC	NC	4	0.3	-0.2	NC	NC	638.4	884.4	761.4	P	P
262349_at	AT2G48130	12	4	4	4			NC	D	NC	NC	NC	NC		262349_at	2220.9	1617.6	1919.25	P	P	0.000244	0.000244	1317.9	2057.7	1687.8	P	P	0.000732	0.000244	-0.5	-0.3	0	0.3	-0.125	0.35	D	NC	NC	NC	1	-0.3	0.4	NC	I	1645.5	1553.5	1599.5	P	P
259275_at	AT3G01060	12	4	4	4			NC		NC	NC	D	NC	NC	259275_at	1306.7	1613	1459.85	P	P	0.000244	0.000244	2132.3	1352.6	1742.45	P	P	0.000244	0.000244	0.3	0.3	-0.4	-0.3	-0.025	0.377492	I	I	NC	NC	2	-0.1	-0.7	NC	D	1789.9	1879.4	1834.65	P	P
259272_at	AT3G01290	12	4	4	4		NC	NC			NC	I	NC	NC	259272_at	6776.3	5774.9	6275.6	P	P	0.000244	0.000244	4189.5	5032.7	4611.1	P	P	0.000244	0.000244	-0.5	-0.4	-0.5	-0.3	-0.425	0.0957427	D	D	D	MD	3	-0.2	0.1	NC	NC	6382.8	6444.9	6413.85	P	P
258949_at	AT3G01370	12	4	4	4		NC	NC	I	NC	NC	NC	NC	NC	258949_at	939	926	932.5	P	P	0.000732	0.000244	1237.3	1049.7	1143.5	P	P	0.000244	0.000244	0.6	0.5	0.2	0.2	0.375	0.206155	I	I	NC	NC	2	0.1	-0.1	NC	NC	923	1095.7	1009.35	P	P
258957_at	AT3G01420	12	4	4	4			NC	NC		NC	I	NC	NC	258957_at	5360.9	4839.1	5100	P	P	0.000244	0.000244	4092.9	5243.4	4668.15	P	P	0.000244	0.000244	-0.3	-0.2	0	0	-0.125	0.15	D	D	NC	NC	2	0	0.3	NC	I	4698.2	4866.9	4782.55	P	P
259165_at	AT3G01470	12	4	4	4	NC	NC	NC		NC	NC	I	NC	NC	259165_at	5335.1	5032.1	5183.6	P	P	0.000244	0.000244	4714.8	4992.5	4853.65	P	P	0.000732	0.000244	-0.2	-0.1	0	0	-0.075	0.0957427	NC	NC	NC	NC	4	-0.1	0.1	NC	NC	4508.9	4806.7	4657.8	P	P
259193_at	AT3G01480	12	4	4	4		NC	NC		NC	NC	D	NC	NC	259193_at	4863.3	5137.6	5000.45	P	P	0.000244	0.000244	6011.7	5547.4	5779.55	P	P	0.000244	0.000244	0.3	0.2	0.2	0.1	0.2	0.0816497	I	NC	NC	NC	1	0.1	-0.1	NC	NC	5329.8	5607.5	5468.65	P	P
259185_at	AT3G01550	12	4	4	4	I		NC		NC		D	NC	NC	259185_at	349.5	337.6	343.55	P	P	0.00293	0.010742	904.5	537.9	721.2	P	P	0.000244	0.000732	1.3	1.5	0.9	0.7	1.1	0.365148	I	I	I	I	4	0.2	-0.9	NC	D	502.1	372	437.05	P	P
259180_at	AT3G01680	12	4	4	4	NC	NC	NC	I	NC	NC	NC	NC	NC	259180_at	871	1146.4	1008.7	P	P	0.000732	0.000732	875.1	1034.3	954.7	P	P	0.000244	0.000244	0.1	-0.1	0.2	0	0.05	0.129099	NC	NC	NC	NC	4	0.2	0	NC	NC	857	711.3	784.15	P	P
259164_at	AT3G01770	12	4	4	4			NC	I	NC	NC	NC	NC	NC	259164_at	416.3	611.7	514	P	P	0.010742	0.010742	692.8	603.9	648.35	P	P	0.001953	0.00415	1	0.4	0.7	0	0.525	0.4272	I	NC	NC	NC	1	0.5	-0.3	NC	D	531.7	417.6	474.65	P	P
258972_at	AT3G01920	12	4	4	4	NC	NC	NC	NC	NC	NC	D	NC	NC	258972_at	1323.7	983.4	1153.55	P	P	0.010742	0.010742	1122.8	752.8	937.8	P	P	0.018555	0.01416	-0.2	-0.3	-0.4	-0.4	-0.325	0.0957427	NC	NC	NC	NC	4	0.1	0	NC	NC	1233.7	1331.6	1282.65	P	P
259005_at	AT3G01930;AT3G01920	12	4	4	4		NC	NC	D	NC	NC		NC	NC	259005_at	1760.8	1655	1707.9	P	P	0.000732	0.000732	1265.4	1422	1343.7	P	P	0.001953	0.000732	-0.6	-0.3	-0.3	-0.2	-0.35	0.173205	D	D	MD	NC	2	-0.2	0.2	NC	NC	1565.6	1437	1501.3	P	P
258975_at	AT3G01970	12	4	4	4	D	NC	NC	D		NC	I	NC	NC	258975_at	956.4	828.1	892.25	P	P	0.000244	0.000244	480.1	571.9	526	P	P	0.000244	0.000244	-0.7	-1	-0.6	-0.7	-0.75	0.173205	D	D	D	D	4	-0.1	0.2	NC	NC	1032.9	982.4	1007.65	P	P
258856_at	AT3G02040;AT3G02030	12	4	4	4	D	NC	NC		NC	NC	NC	NC	NC	258856_at	1024.6	1206	1115.3	P	P	0.000244	0.000244	591.9	709	650.45	P	P	0.000732	0.000244	-0.8	-0.8	-0.5	-0.4	-0.625	0.206155	D	D	D	D	4	-0.2	0.2	NC	NC	965.6	1011.6	988.6	P	P
258861_at	AT3G02060	12	4	4	4	NC	NC	NC	I	NC	NC	NC	NC	NC	258861_at	1166.3	826.4	996.35	P	P	0.01416	0.023926	1009.4	1058.4	1033.9	P	P	0.023926	0.01416	0.1	0.4	-0.1	0.2	0.15	0.208167	NC	NC	NC	NC	4	-0.3	-0.2	NC	NC	1011.9	1013.8	1012.85	P	P
259076_at	AT3G02140	12	4	4	4	D	NC	NC		NC	NC	NC	NC	NC	259076_at	477.9	430.3	454.1	P	P	0.001953	0.001221	228.7	271.9	250.3	P	P	0.018555	0.010742	-0.6	-0.3	-0.8	-0.4	-0.525	0.221736	D	D	D	D	4	0	-0.1	NC	NC	417.9	369.7	393.8	P	P
258494_at	AT3G02450	12	4	4	4		NC	NC	I	NC	NC	NC	NC	NC	258494_at	1004.3	1497	1250.65	P	P	0.000244	0.000244	1727.6	1516.6	1622.1	P	P	0.000244	0.000244	0.5	0.2	0.4	0.1	0.3	0.182574	I	NC	I	NC	2	0.3	-0.1	NC	NC	1178.8	1457.7	1318.25	P	P
258487_at	AT3G02550	12	4	4	4			NC	D	NC	NC				258487_at	3423.5	2939.3	3181.4	P	P	0.000732	0.001221	1497.8	2602.4	2050.1	P	P	0.00415	0.001221	-1.1	-0.9	-0.4	-0.4	-0.7	0.355903	D	D	D	MD	3	-0.1	0.7	NC	I	1846.3	2465	2155.65	P	P
258486_at	AT3G02560	12	4	4	4	NC	NC	NC			NC	D	NC	NC	258486_at	11321.4	11724.7	11523	P	P	0.000244	0.000244	12132.8	11653.3	11893	P	P	0.000244	0.000244	0.2	0.1	0.1	0	0.1	0.0816497	NC	NC	NC	NC	4	0	-0.1	NC	NC	12541.9	11304.7	11923.3	P	P
258480_at	AT3G02640	12	4	4	4	I	NC	NC	I	NC	NC		NC	NC	258480_at	766.3	1070.8	918.55	P	P	0.000244	0.001953	1298.9	1339.8	1319.35	P	P	0.000244	0.000244	0.5	0.4	0.5	0.4	0.45	0.057735	I	I	I	I	4	0.1	0	NC	NC	980	1059.7	1019.85	P	P
258475_at	AT3G02660	12	4	4	4		NC	NC	I	NC	NC	NC	NC	NC	258475_at	579.5	701.6	640.55	P	P	0.000244	0.000244	959.8	724.9	842.35	P	P	0.000244	0.000244	0.5	0.3	0.3	0.1	0.3	0.163299	I	NC	I	NC	2	0.2	-0.2	NC	NC	684.5	564.7	624.6	P	P
258601_at	AT3G02760	12	4	4	4		NC	NC	I	NC	NC	NC	NC	NC	258601_at	631.8	719.5	675.65	P	P	0.000244	0.000244	998.7	823.6	911.15	P	P	0.000244	0.000244	0.6	0.4	0.5	0.1	0.4	0.216025	I	I	I	NC	3	0.2	-0.1	NC	NC	669.1	819.2	744.15	P	P
258609_at	AT3G02910	12	4	4	4				D	NC	NC	NC	NC	NC	258609_at	6393.3	5162.4	5777.85	P	P	0.000244	0.000244	3624.1	4942.9	4283.5	P	P	0.000244	0.000244	-0.6	-0.4	-0.3	-0.1	-0.35	0.208167	D	D	NC	NC	2	-0.3	0.4	MD	I	5047.7	5718.1	5382.9	P	P
258617_at	AT3G03000	11	4	3	4			NC	D	NC	NC		NC	NC	258617_at	475.6	351.5	413.55	P	P	0.001953	0.001221	216.6	349.8	283.2	P	P	0.01416	0.000244	-0.8	-0.6	0	0.3	-0.275	0.512348	D	D	NC	NC	2	-0.2	0.5	NC	I	361.1	450.7	405.9	P	P
258875_at	AT3G03160	12	4	4	4			NC	D	NC	NC	NC	NC	NC	258875_at	3651.1	3232	3441.55	P	P	0.000244	0.000732	2829.8	3574.5	3202.15	P	P	0.000732	0.000244	-0.3	-0.3	-0.1	0	-0.175	0.15	D	D	NC	NC	2	-0.1	0.3	NC	MI	3600.3	3623.5	3611.9	P	P
258863_at	AT3G03300	10	2	4	4	NC	NC	NC	I	NC	NC	NC	NC	NC	258863_at	195.7	48.1	121.9	M	A	0.056152	0.095215	295.3	284.2	289.75	P	P	0.01416	0.001953	0.5	2.3	0.3	2	1.275	1.02103	NC	NC	NC	NC	4	-1.6	0	NC	NC	203.1	328.7	265.9	P	P
259058_at	AT3G03470	12	4	4	4			NC	D	NC	NC		NC	NC	259058_at	1081.4	1019.6	1050.5	P	P	0.000732	0.000244	692.9	900.7	796.8	P	P	0.005859	0.000732	-0.6	-0.6	-0.5	-0.4	-0.525	0.0957427	D	D	D	NC	3	-0.2	0.3	NC	I	806.1	1035.6	920.85	P	P
259172_at	AT3G03630	12	4	4	4		NC	NC	I	NC	NC		NC	NC	259172_at	423.2	440.2	431.7	P	P	0.010742	0.01416	604.7	686.1	645.4	P	P	0.005859	0.001221	0.5	0.5	0.6	0.2	0.45	0.173205	I	I	NC	NC	2	0.3	-0.1	NC	NC	525.3	506.4	515.85	P	P
259344_at	AT3G03710	12	4	4	4		NC	NC	I	NC	NC		NC	NC	259344_at	639	620.6	629.8	P	P	0.000244	0.000244	860	887.3	873.65	P	P	0.000244	0.000244	0.4	0.4	0.4	0.5	0.425	0.05	MI	I	NC	NC	1	0	0	NC	NC	790.1	556.8	673.45	P	P
259348_at	AT3G03770	12	4	4	4	I	NC	NC		NC	NC	NC	NC	NC	259348_at	456	416.2	436.1	P	P	0.005859	0.005859	640.7	646.2	643.45	P	P	0.005859	0.000732	0.5	0.5	0.3	0.5	0.45	0.1	I	I	I	I	4	0	-0.2	NC	NC	476.9	481.3	479.1	P	P
258811_at	AT3G03990	12	4	4	4	D	NC	NC	D	NC	NC	NC	NC	NC	258811_at	4545.5	3981.4	4263.45	P	P	0.000244	0.000244	2838.6	2773.3	2805.95	P	P	0.000244	0.000244	-0.7	-0.4	-0.6	-0.5	-0.55	0.129099	D	D	D	D	4	-0.2	0	NC	NC	4407.4	4098.4	4252.9	P	P
258815_at	AT3G04000	12	4	4	4	D	NC	NC	D	NC	NC	NC		NC	258815_at	1150	1262.5	1206.25	P	P	0.000732	0.000244	535.6	605.8	570.7	P	P	0.000732	0.000244	-0.9	-1	-0.9	-1.2	-1	0.141421	D	D	D	D	4	0.1	-0.1	NC	NC	1547.2	1264.5	1405.85	P	P
258809_at	AT3G04070	12	4	4	4		NC	NC			NC	I	NC	NC	258809_at	1585.2	1644.3	1614.75	P	P	0.000244	0.000244	944.2	1277.1	1110.65	P	P	0.000732	0.000244	-0.5	-0.7	-0.5	-0.4	-0.525	0.125831	D	D	MD	D	3	0.1	0.2	NC	NC	1726.6	1537.9	1632.25	P	P
258573_at	AT3G04260	12	4	4	4		NC	NC	I	NC	NC		NC	NC	258573_at	884.1	1136.1	1010.1	P	P	0.000244	0.000244	1585.5	1159.2	1372.35	P	P	0.000244	0.000244	0.7	0.4	0.3	0	0.35	0.288675	I	I	NC	NC	2	0.2	-0.4	NC	NC	1053.9	981.3	1017.6	P	P
258796_at	AT3G04630	12	4	4	4		NC	NC	I	NC	NC		NC	NC	258796_at	448.7	557.6	503.15	P	P	0.001953	0.000732	812.1	630.9	721.5	P	P	0.001221	0.000732	0.8	0.6	0.4	0.2	0.5	0.258199	I	I	I	NC	3	0.2	-0.4	NC	NC	550.8	462.1	506.45	P	P
258802_at	AT3G04650	12	4	4	4	NC	NC	NC	I	NC	NC	NC	NC	NC	258802_at	1021.5	916.9	969.2	P	P	0.010742	0.00415	1182.9	1057.5	1120.2	P	P	0.00415	0.001953	0.3	0.3	0.3	0	0.225	0.15	NC	NC	NC	NC	4	0.1	-0.1	NC	NC	920.4	912.7	916.55	P	P
258794_at	AT3G04710	12	4	4	4		NC	NC	I	NC	NC	NC	NC	NC	258794_at	590.2	761.4	675.8	P	P	0.000732	0.001221	983.5	873	928.25	P	P	0.000732	0.000732	0.5	0.4	0.4	0.3	0.4	0.0816497	I	I	NC	I	3	0	-0.1	NC	NC	636.2	547.1	591.65	P	P
258791_at	AT3G04720	12	4	4	4	D	NC	NC	D	NC	NC		NC		258791_at	40523.4	37102.4	38812.9	P	P	0.000244	0.000244	23440.7	25080.4	24260.5	P	P	0.000244	0.000244	-0.7	-0.6	-0.6	-0.5	-0.6	0.0816497	D	D	D	D	4	-0.1	0.1	NC	NC	39006.2	40120.6	39563.4	P	P
258804_at	AT3G04760	12	4	4	4	NC	NC	NC	I	NC	NC	NC	NC	NC	258804_at	1744.1	1820.4	1782.25	P	P	0.000244	0.000244	1868	1609.1	1738.55	P	P	0.000244	0.000244	0.1	0	-0.1	-0.1	-0.025	0.0957427	NC	NC	NC	NC	4	0.1	-0.2	NC	NC	1746.2	1526.5	1636.35	P	P
259083_at	AT3G04810	12	4	4	4		NC	NC	I	NC	NC	NC	NC	NC	259083_at	363	399.1	381.05	P	P	0.008057	0.005859	547.7	541.5	544.6	P	P	0.008057	0.001953	0.4	0.3	0.3	0.2	0.3	0.0816497	NC	NC	I	NC	3	0.1	0	NC	NC	437.4	438	437.7	P	P
259094_at	AT3G04940	12	4	4	4		NC		I	NC	NC	NC	NC	NC	259094_at	714.1	980.5	847.3	P	P	0.030273	0.01416	813.4	917.1	865.25	P	P	0.018555	0.018555	0.4	0.2	0.4	0.2	0.3	0.11547	I	NC	I	NC	2	0.2	0	MI	NC	778	767.2	772.6	P	P
259085_at	AT3G05000	12	4	4	4	NC	NC	NC	D	NC	NC	NC	NC	NC	259085_at	2090.5	1813.8	1952.15	P	P	0.000244	0.000244	1648.2	1695.7	1671.95	P	P	0.000244	0.000244	-0.2	-0.1	-0.1	0.1	-0.075	0.125831	NC	NC	NC	NC	4	-0.2	0.2	NC	NC	2153.6	2190.9	2172.25	P	P
259312_at	AT3G05200	12	4	4	4	D	NC	NC	D	NC	NC	NC	NC	NC	259312_at	3223.8	2731.8	2977.8	P	P	0.00293	0.001221	1794.3	1381.6	1587.95	P	P	0.00415	0.001953	-0.5	-0.5	-0.8	-0.6	-0.6	0.141421	D	D	D	D	4	-0.1	-0.1	NC	NC	3067.1	3046.9	3057	P	P
259354_at	AT3G05220	12	4	4	4	I	NC	NC		NC		NC	NC	NC	259354_at	3210.8	3088.6	3149.7	P	P	0.000244	0.000244	3916.4	3781.2	3848.8	P	P	0.000244	0.000244	0.4	0.3	0.4	0.3	0.35	0.057735	I	I	I	I	4	0.1	-0.1	NC	NC	2476.3	3420.1	2948.2	P	P
259296_at	AT3G05350	12	4	4	4		NC	NC	I	NC	NC		NC	NC	259296_at	1727.4	1896.5	1811.95	P	P	0.000244	0.000244	2203.7	2055.8	2129.75	P	P	0.000244	0.000244	0.5	0.4	0.3	0.2	0.35	0.129099	I	NC	NC	NC	1	0.2	-0.2	NC	NC	1650.9	1769.2	1710.05	P	P
259298_at	AT3G05370	9	2	3	4		NC	NC	I	NC	NC	NC	NC	NC	259298_at	197.7	220.4	209.05	A	A	0.067627	0.111572	339.6	196.9	268.25	P	P	0.023926	0.018555	0.8	0.7	0	0	0.375	0.434933	I	I	NC	NC	2	0.1	-0.6	NC	NC	154.4	87.3	120.85	P	A
259106_at	AT3G05490	12	4	4	4			NC	D	NC	NC	NC	NC	NC	259106_at	2406.7	2473	2439.85	P	P	0.000244	0.000244	1584.3	2151.5	1867.9	P	P	0.000244	0.000244	-0.7	-0.6	-0.2	-0.1	-0.4	0.294392	D	D	NC	NC	2	-0.1	0.5	NC	I	3042.7	2439.4	2741.05	P	P
259105_at	AT3G05500	12	4	4	4	NC	NC	NC	D	NC	NC	NC	NC	NC	259105_at	2729.7	2286.4	2508.05	P	P	0.000244	0.000244	2086	2453.2	2269.6	P	P	0.000244	0.000244	-0.2	-0.1	-0.2	-0.1	-0.15	0.057735	NC	NC	NC	NC	4	0	0	NC	NC	2685.8	2809.8	2747.8	P	P
258895_at	AT3G05600	12	4	4	4		NC	NC		NC	NC	D	NC	NC	258895_at	345.3	334.5	339.9	P	P	0.005859	0.001953	357.5	421.7	389.6	P	P	0.000244	0.00293	0.9	0.3	0.7	0.1	0.5	0.365148	I	I	NC	NC	2	0.4	-0.2	NC	NC	337.7	450.5	394.1	P	P
258890_at	AT3G05690	12	4	4	4	NC	NC	NC			NC	I	NC	NC	258890_at	1878	1754.3	1816.15	P	P	0.008057	0.010742	1877.7	2012.1	1944.9	P	P	0.023926	0.01416	0	0.1	0.2	0.2	0.125	0.0957427	NC	NC	NC	NC	4	0	0.1	NC	NC	1571.1	1764.9	1668	P	P
258897_at	AT3G05730	12	4	4	4			NC			NC	D	NC	NC	258897_at	5143.2	5293.5	5218.35	P	P	0.000244	0.000244	4717.9	3500.4	4109.15	P	P	0.000244	0.000244	-0.2	-0.1	-0.7	-0.7	-0.425	0.320156	NC	NC	D	D	2	0	-0.5	NC	D	5969.7	6119.4	6044.55	P	P
258738_at	AT3G05750	5	1	2	2	NC	NC	NC	I	NC	NC	NC	NC	NC	258738_at	185	156.5	170.75	A	A	0.095215	0.095215	225.1	209.9	217.5	A	P	0.080566	0.030273	0.1	0.1	0.3	0.1	0.15	0.1	NC	NC	NC	NC	4	0.2	-0.1	NC	NC	125.7	123.7	124.7	A	A
258736_at	AT3G05900	12	4	4	4		NC	NC	I	NC	NC		NC	NC	258736_at	428.8	533.7	481.25	P	P	0.00415	0.000732	722	586.1	654.05	P	P	0.000732	0.001221	0.5	0.3	0.4	0.2	0.35	0.129099	I	I	NC	NC	2	0.2	-0.3	NC	NC	511.2	496	503.6	P	P
258904_at	AT3G06400	12	4	4	4		NC	NC	I	NC	NC	NC	NC	NC	258904_at	1804.1	2092.9	1948.5	P	P	0.000244	0.000244	2362.9	2341.6	2352.25	P	P	0.000244	0.000244	0.4	0.3	0.3	0.1	0.275	0.125831	I	I	NC	NC	2	0.2	-0.2	NC	NC	1805.3	1947.1	1876.2	P	P
258505_at	AT3G06530	12	4	4	4		NC	NC	I	NC	NC		NC	NC	258505_at	680.1	700.5	690.3	P	P	0.000244	0.000244	1075.8	925.7	1000.75	P	P	0.000244	0.000244	0.8	0.6	0.5	0.3	0.55	0.208167	I	I	I	NC	3	0.2	-0.3	NC	NC	766.1	694.6	730.35	P	P
258534_at	AT3G06730	12	4	4	4	NC	NC	NC	I	NC	NC	NC	NC	NC	258534_at	2318.4	2135.7	2227.05	P	P	0.001221	0.000244	2595.3	2555.2	2575.25	P	P	0.000244	0.000244	0.3	0.3	0.1	0.2	0.225	0.0957427	NC	NC	NC	NC	4	0	-0.1	NC	NC	2248.4	1985.7	2117.05	P	P
258501_at	AT3G06780;AT3G06790	12	4	4	4		NC		D	NC	NC	NC	NC	NC	258501_at	1043.6	839.1	941.35	P	P	0.000244	0.000244	818.6	953.7	886.15	P	P	0.000244	0.000732	-0.3	0	-0.3	0	-0.15	0.173205	D	NC	NC	NC	1	-0.3	0.1	D	NC	1155.6	1010.2	1082.9	P	P
258554_at	AT3G06980	12	4	4	4	NC	NC	NC	I		NC	D	NC	NC	258554_at	2276.9	2188.7	2232.8	P	P	0.001221	0.001221	2425.2	2191.8	2308.5	P	P	0.001221	0.000732	0.3	0.2	0	0	0.125	0.15	NC	NC	NC	NC	4	0	-0.1	NC	NC	1848.8	2181.7	2015.25	P	P
258552_at	AT3G07010	12	4	4	4	I	NC	NC	NC	NC	NC	NC	NC	NC	258552_at	1138.6	1120.8	1129.7	P	P	0.001221	0.001953	1427.1	1244	1335.55	P	P	0.001221	0.000244	0.4	0.4	0.4	0.5	0.425	0.05	I	I	I	I	4	-0.1	0.1	NC	NC	920.3	884.6	902.45	P	P
259015_at	AT3G07350	11	3	4	4	D	NC	NC	D	NC	NC		NC	NC	259015_at	1194.6	952.4	1073.5	P	P	0.000244	0.000244	277.6	287.6	282.6	M	P	0.056152	0.018555	-1.3	-1.3	-1.7	-1.6	-1.475	0.206155	D	D	D	D	4	0	-0.2	NC	NC	805.1	955.9	880.5	P	P
259016_at	AT3G07480	12	4	4	4				D	NC	NC	NC	NC	NC	259016_at	9647.5	7346.9	8497.2	P	P	0.000244	0.000244	6845.5	8738	7791.75	P	P	0.000244	0.000244	-0.5	-0.2	-0.1	0.1	-0.175	0.25	D	D	NC	NC	2	-0.2	0.3	D	I	8606.7	10643.4	9625.05	P	P
259248_at	AT3G07770	12	4	4	4	I	NC	NC	I	NC	NC		NC	NC	259248_at	1638.9	1857.7	1748.3	P	P	0.000244	0.000244	2466.7	2314.4	2390.55	P	P	0.000244	0.000244	0.5	0.4	0.4	0.3	0.4	0.0816497	I	I	I	I	4	0.2	-0.1	NC	NC	1880.5	1882.5	1881.5	P	P
258646_at	AT3G08040	12	4	4	4	D	NC	NC	D	NC	NC		NC	NC	258646_at	1537.5	1199.9	1368.7	P	P	0.000244	0.000244	907.8	981	944.4	P	P	0.001953	0.000732	-0.7	-0.7	-0.7	-0.6	-0.675	0.05	D	D	D	D	4	0	0.1	NC	NC	1267	1427.2	1347.1	P	P
256438_s_at	AT3G08520;AT3G56020;AT3G11120;AT2G40205	12	4	4	4	NC	NC	NC		NC	NC	D	NC	NC	256438_s_at	9504.6	9696.2	9600.4	P	P	0.000977	0.000977	8801	10067.7	9434.35	P	P	0.000977	0.000977	-0.1	-0.1	0	0.2	0	0.141421	NC	NC	NC	NC	4	0	0.1	NC	NC	11159.6	8855.6	10007.6	P	P
258691_at	AT3G08630	12	4	4	4		NC	NC	D	NC	NC	NC	NC	NC	258691_at	669.8	793.9	731.85	P	P	0.000244	0.000732	964.7	824.2	894.45	P	P	0.00293	0.000732	-0.1	-0.3	0.1	-0.1	-0.1	0.163299	NC	D	NC	NC	3	0.1	0	NC	NC	898.9	1088.7	993.8	P	P
258678_at	AT3G08690	12	4	4	4	NC	NC	NC		NC	NC	I	NC	NC	258678_at	2310.6	2186.1	2248.35	P	P	0.000244	0.000244	2080	2262	2171	P	P	0.000244	0.000244	-0.2	-0.1	-0.2	-0.1	-0.15	0.057735	NC	NC	NC	NC	4	-0.1	0	NC	NC	2740	2354.7	2547.35	P	P
258677_at	AT3G08720;AT3G08730	12	4	4	4		NC	NC	I	NC	NC		NC	NC	258677_at	1162.7	1157.9	1160.3	P	P	0.000244	0.000244	1640.8	1289.4	1465.1	P	P	0.000244	0.000244	0.5	0.4	0.1	0.1	0.275	0.206155	I	I	NC	NC	2	0.1	-0.3	NC	NC	1124.8	1265.4	1195.1	P	P
258675_at	AT3G08770	12	4	4	4	I	NC	NC	I	NC	NC	D		NC	258675_at	1377.8	1695.8	1536.8	P	P	0.000244	0.000244	3765.6	2849.7	3307.65	P	P	0.000244	0.000244	1.5	1.2	1.1	0.9	1.175	0.25	I	I	I	I	4	0.2	-0.3	NC	NC	1956.6	1778.7	1867.65	P	P
258983_at	AT3G08860	12	4	4	4		NC			NC		I	NC	NC	258983_at	975.6	557.4	766.5	P	P	0.001221	0.000244	846.7	698.6	772.65	P	P	0.001221	0.001221	-0.3	0.5	-0.2	0.2	0.05	0.369685	D	NC	NC	NC	1	-0.7	0.1	D	NC	887.5	1024	955.75	P	P
258982_at	AT3G08870	3	1	0	2	NC	NC	NC			NC	I	NC	NC	258982_at	214.5	163.9	189.2	P	A	0.01416	0.246094	151.5	107.8	129.65	A	M	0.149658	0.056152	-0.2	0.5	-1.1	-0.1	-0.225	0.660177	NC	NC	NC	NC	4	-0.9	-0.7	NC	NC	134.3	168.4	151.35	A	M
258993_at	AT3G08940	12	4	4	4		NC	NC	NC	NC	NC	D	NC	NC	258993_at	13076.3	12498.2	12787.2	P	P	0.000244	0.000244	16360.9	13735.3	15048.1	P	P	0.000244	0.000244	0.4	0.4	0.1	0.1	0.25	0.173205	I	I	NC	NC	2	0	-0.3	NC	NC	15322.9	14173.6	14748.2	P	P
259038_at	AT3G09210	12	4	4	4		NC	NC	I	NC	NC	NC	NC	NC	259038_at	1838.3	1861.1	1849.7	P	P	0.000244	0.000244	2257.2	1959.7	2108.45	P	P	0.000244	0.000244	0.3	0.2	0.2	0.2	0.225	0.05	NC	NC	NC	I	3	-0.1	0	NC	NC	1896.4	1534.7	1715.55	P	P
259008_at	AT3G09390	12	4	4	4			NC	D	NC	NC	I	NC	NC	259008_at	31530.1	28904.4	30217.2	P	P	0.000244	0.000244	16918.7	24138.2	20528.5	P	P	0.000244	0.000244	-0.9	-0.8	-0.4	-0.3	-0.6	0.294392	D	D	D	NC	3	-0.1	0.5	NC	I	31470.5	29297.8	30384.2	P	P
258708_at	AT3G09580	12	4	4	4	NC	NC	NC		NC	NC	D	NC	NC	258708_at	1023.8	1112.6	1068.2	P	P	0.000244	0.000244	1162.2	1293.2	1227.7	P	P	0.000244	0.000244	0.3	0.2	0.4	0.3	0.3	0.0816497	NC	NC	NC	NC	4	0	0.1	NC	NC	1317.1	1270.3	1293.7	P	P
258933_at	AT3G09980	12	4	4	4		NC	NC	I	NC	NC	NC	NC	NC	258933_at	363.4	638.6	501	P	P	0.018555	0.001953	910.1	801.3	855.7	P	P	0.001221	0.001953	0.7	0.7	0.5	0.5	0.6	0.11547	I	I	I	NC	3	0.1	-0.2	NC	NC	608.2	471.2	539.7	P	P
258939_at	AT3G10020	12	4	4	4	D	NC	NC		NC	NC	NC	NC	NC	258939_at	1749.8	1355.3	1552.55	P	P	0.000244	0.000244	1095.2	1097.8	1096.5	P	P	0.000732	0.001221	-0.6	-0.4	-0.8	-0.5	-0.575	0.170783	D	D	D	D	4	-0.2	0	NC	NC	1450.5	1518.2	1484.35	P	P
258929_at	AT3G10060	12	4	4	4	NC	NC	NC	NC	NC	NC	D	NC	NC	258929_at	2030.8	2356.7	2193.75	P	P	0.000244	0.000244	2516.4	2400.1	2458.25	P	P	0.000244	0.000244	0.1	0.1	0	0	0.05	0.057735	NC	NC	NC	NC	4	-0.1	0	NC	NC	2026.1	2411.8	2218.95	P	P
259140_at	AT3G10230	12	4	4	4	NC	NC	NC	I	NC	NC		NC	NC	259140_at	2479	2450.7	2464.85	P	P	0.000244	0.000244	2418.9	2294.4	2356.65	P	P	0.000244	0.000244	0.3	0.2	0.1	0	0.15	0.129099	NC	NC	NC	NC	4	0	-0.2	NC	NC	2322.1	2513.8	2417.95	P	P
258970_at	AT3G10410	12	4	4	4		NC	NC	NC	NC	NC	I	NC	NC	258970_at	5518.2	5935.8	5727	P	P	0.000244	0.000244	4801.5	5582.6	5192.05	P	P	0.000244	0.000244	-0.1	-0.2	0	0	-0.075	0.0957427	NC	D	NC	NC	3	0.1	0.1	NC	NC	6224.6	5619.1	5921.85	P	P
258923_at	AT3G10450	12	4	4	4	NC	NC	NC	NC		NC	I	NC	NC	258923_at	553.3	508.8	531.05	P	P	0.000732	0.000732	467.8	468.9	468.35	P	P	0.000732	0.000244	0.2	0.1	0	-0.1	0.05	0.129099	NC	NC	NC	NC	4	0	-0.2	NC	NC	507.5	545.2	526.35	P	P
258922_at	AT3G10610	12	4	4	4	NC	NC	NC		NC	NC	D	NC	NC	258922_at	3329.1	3259.6	3294.35	P	P	0.000244	0.000244	3767.2	3251.2	3509.2	P	P	0.000244	0.000244	0.2	0.1	0.1	0.1	0.125	0.05	NC	NC	NC	NC	4	0.1	0	NC	NC	3589.1	2775.8	3182.45	P	P
258966_at	AT3G10690	12	4	4	4		NC	NC	I	NC	NC	D	NC	NC	258966_at	1279	1196.3	1237.65	P	P	0.001953	0.001953	1508	1533.2	1520.6	P	P	0.001953	0.001953	0.4	0.4	0.2	0.2	0.3	0.11547	I	MI	NC	NC	1	0	-0.2	NC	NC	1117	1230.9	1173.95	P	P
258758_at	AT3G10810	11	4	3	4	D	NC	NC	D	NC	NC	D	NC	NC	258758_at	835.7	756.6	796.15	P	P	0.001953	0.000732	696	437.9	566.95	P	P	0.030273	0.005859	-0.5	-0.4	-0.9	-0.7	-0.625	0.221736	D	D	D	D	4	0	-0.1	NC	NC	674.1	656.4	665.25	P	P
256441_at	AT3G10940	12	4	4	4	I	NC	NC		NC	NC	NC	NC	NC	256441_at	912.9	963.5	938.2	P	P	0.000732	0.000244	1452.2	1315.3	1383.75	P	P	0.000244	0.000244	0.6	0.6	0.5	0.4	0.525	0.0957427	I	I	I	I	4	0.1	-0.1	NC	NC	1082.7	869.5	976.1	P	P
256440_at	AT3G10970	12	4	4	4		NC	NC	I	NC	NC	NC	NC	NC	256440_at	2251.1	2510.6	2380.85	P	P	0.000244	0.000244	2993.7	2953.2	2973.45	P	P	0.000244	0.000244	0.3	0.3	0.3	0.1	0.25	0.1	I	NC	NC	NC	1	0.2	-0.1	NC	NC	3249	3171.8	3210.4	P	P
256433_at	AT3G10985	12	4	4	4		NC	NC	D		NC	I	NC	NC	256433_at	2512.4	2384.6	2448.5	P	P	0.000244	0.000244	1853.6	2136.5	1995.05	P	P	0.000732	0.000244	-0.6	-0.4	-0.3	-0.2	-0.375	0.170783	D	D	NC	NC	2	-0.2	0.1	NC	NC	2451.6	2415.4	2433.5	P	P
256415_at	AT3G11210	12	4	4	4	NC	NC	NC	I	NC	NC	NC	NC	NC	256415_at	449	545	497	P	P	0.008057	0.000732	574	440.9	507.45	P	P	0.000244	0.000244	0.1	0	0	-0.4	-0.075	0.221736	NC	NC	NC	NC	4	0.2	-0.4	NC	NC	375.1	412.2	393.65	P	P
256252_at	AT3G11340	12	4	4	4	NC	NC	NC	D	NC	NC			NC	256252_at	682.3	581.1	631.7	P	P	0.000244	0.001953	602.3	736.9	669.6	P	P	0.000244	0.000244	0.6	0.4	0.1	0	0.275	0.275379	NC	NC	NC	NC	4	0.1	-0.4	NC	NC	815.6	694.4	755	P	P
259292_at	AT3G11560	12	4	4	4		NC	NC	I	NC	NC	NC	NC	NC	259292_at	660.1	916.4	788.25	P	P	0.000244	0.000244	1158.2	998.9	1078.55	P	P	0.000244	0.000244	0.3	0.3	0.3	0.2	0.275	0.05	I	NC	NC	NC	1	0.2	-0.1	NC	NC	816.6	842.4	829.5	P	P
259102_at	AT3G11660	12	4	4	4		NC	NC	D		NC	I	NC	NC	259102_at	2753.2	2357.1	2555.15	P	P	0.000244	0.000244	1898.9	2285.8	2092.35	P	P	0.000732	0.000244	-0.5	-0.2	-0.3	0	-0.25	0.208167	D	NC	NC	NC	1	-0.3	0.2	NC	NC	2530.8	2850	2690.4	P	P
259069_at	AT3G11710	12	4	4	4		NC		I	NC	NC	NC	NC	NC	259069_at	4188.9	5048	4618.45	P	P	0.000244	0.000244	5849.5	4301.2	5075.35	P	P	0.000244	0.000244	0.5	0.2	0.2	-0.1	0.2	0.244949	I	NC	NC	NC	1	0.2	-0.3	I	NC	3936.6	4208.4	4072.5	P	P
258728_at	AT3G11800	12	4	4	4			NC	D	NC	NC	NC	NC	NC	258728_at	2754.2	2941.6	2847.9	P	P	0.000244	0.000244	2184.1	2744.4	2464.25	P	P	0.000244	0.000244	-0.3	-0.4	0	-0.1	-0.2	0.182574	D	D	NC	NC	2	0.1	0.4	NC	I	2928.1	2699.1	2813.6	P	P
256274_at	AT3G12080	12	4	4	4	NC	NC	NC	I	NC	NC	NC	NC	NC	256274_at	1920.8	2070.5	1995.65	P	P	0.00293	0.00415	2449.1	2195.4	2322.25	P	P	0.005859	0.00293	0.3	0.2	0.2	0.1	0.2	0.0816497	NC	NC	NC	NC	4	0.1	-0.1	NC	NC	1850.7	2051.5	1951.1	P	P
256275_at	AT3G12110	12	4	4	4		NC	NC		NC	NC	D	NC	NC	256275_at	863.7	1205.8	1034.75	P	P	0.001953	0.000732	977.4	1057.1	1017.25	P	P	0.000732	0.000732	0.2	0.1	0.4	0.1	0.2	0.141421	NC	NC	I	NC	3	0.2	0.1	NC	NC	795.4	1079.6	937.5	P	P
256271_at	AT3G12140	12	4	4	4	NC	NC	NC	I	NC	NC	NC	NC	NC	256271_at	542.3	624.9	583.6	P	P	0.008057	0.001221	738.4	682.1	710.25	P	P	0.00415	0.00293	0.3	0.1	0.2	0.1	0.175	0.0957427	NC	NC	NC	NC	4	0.1	-0.1	NC	NC	443.3	491.4	467.35	P	P
256244_at	AT3G12520	12	4	4	4	NC	NC	NC	NC	NC	NC	I	NC	NC	256244_at	493.6	449.8	471.7	P	P	0.000732	0.001221	629.3	546.5	587.9	P	P	0.000732	0.000732	0.1	0.2	0.2	0.1	0.15	0.057735	NC	NC	NC	NC	4	-0.1	-0.2	NC	NC	611.5	554.5	583	P	P
256231_at	AT3G12630	12	4	4	4				D	NC	NC	NC	NC	NC	256231_at	8636.2	6681	7658.6	P	P	0.000244	0.000244	5410.4	6230.3	5820.35	P	P	0.000244	0.000244	-0.6	-0.3	-0.3	0	-0.3	0.244949	D	D	NC	NC	2	-0.3	0.3	D	I	8521.5	7317	7919.25	P	P
257856_at	AT3G12930	12	4	4	4		NC	NC	I	NC	NC	NC	NC	NC	257856_at	2149	2291.9	2220.45	P	P	0.000244	0.000244	2647	2530	2588.5	P	P	0.000244	0.000244	0.4	0.2	0.1	0	0.175	0.170783	MI	NC	NC	NC	1	0.1	-0.2	NC	NC	2392.9	2396.9	2394.9	P	P
257547_at	AT3G13000	12	4	4	4			NC	I	NC	NC	NC	NC	NC	257547_at	423.9	422.4	423.15	P	P	0.005859	0.010742	417	435	426	P	P	0.000732	0.00415	0.5	0.4	0.1	0	0.25	0.238048	I	I	NC	NC	2	-0.1	-0.3	NC	MD	364.2	325.6	344.9	P	P
257178_at	AT3G13070	12	4	4	4				I	NC	NC		NC	NC	257178_at	1305	1734.5	1519.75	P	P	0.000244	0.000244	2055.9	1598.7	1827.3	P	P	0.000244	0.000244	0.6	0.2	0.2	-0.1	0.225	0.287228	I	NC	I	NC	2	0.4	-0.4	MI	D	1462.6	1194.2	1328.4	P	P
257194_at	AT3G13110	12	4	4	4		NC		D	NC	NC	NC	NC	NC	257194_at	15115.9	12959.1	14037.5	P	P	0.000244	0.000244	10490.1	11510.7	11000.4	P	P	0.000244	0.000244	-0.6	-0.3	-0.4	-0.2	-0.375	0.170783	D	D	D	NC	3	-0.2	0.2	D	NC	13309.5	14965.7	14137.6	P	P
257654_at	AT3G13310	12	4	4	4			NC	D	NC	NC	NC	NC	NC	257654_at	3285.8	2639.6	2962.7	P	P	0.000732	0.000732	1986.5	2532.6	2259.55	P	P	0.001221	0.001221	-0.6	-0.5	-0.2	-0.1	-0.35	0.238048	D	D	NC	NC	2	-0.1	0.3	NC	I	2022.4	2443.4	2232.9	P	P
256983_at	AT3G13470	12	4	4	4	I	NC	NC	I			NC	NC	NC	256983_at	7618.1	8393.1	8005.6	P	P	0.000244	0.000244	10435.5	10923.7	10679.6	P	P	0.000244	0.000244	0.4	0.3	0.4	0.3	0.35	0.057735	I	I	I	I	4	0.1	0	NC	NC	7328.7	8872.3	8100.5	P	P
256963_at	AT3G13490	12	4	4	4	NC	NC	NC	I	NC	NC	NC	NC	NC	256963_at	664.3	863.5	763.9	P	P	0.005859	0.000732	862.8	869.4	866.1	P	P	0.001221	0.000732	0.3	0.1	0.2	0	0.15	0.129099	NC	NC	NC	NC	4	0.1	-0.1	NC	NC	771.7	740.4	756.05	P	P
256964_at	AT3G13520	12	4	4	4	NC	NC	NC	D	NC	NC		NC	NC	256964_at	17343.8	16402.6	16873.2	P	P	0.001221	0.001221	14983.8	15698.2	15341	P	P	0.001221	0.000732	-0.3	-0.1	-0.1	0	-0.125	0.125831	NC	NC	NC	NC	4	-0.1	0.1	NC	NC	17510.9	18610.5	18060.7	P	P
256962_at	AT3G13560	12	4	4	4	I	NC	NC		NC	NC		NC	NC	256962_at	1119.2	1170.5	1144.85	P	P	0.000732	0.001221	1579.8	1355.6	1467.7	P	P	0.000732	0.000732	0.4	0.5	0.3	0.4	0.4	0.0816497	I	I	I	I	4	-0.1	-0.1	NC	NC	1176.1	1165.1	1170.6	P	P
256648_at	AT3G13580	12	4	4	4	NC	NC	NC	I	NC	NC	NC	NC	NC	256648_at	3607.1	3412.6	3509.85	P	P	0.000244	0.000244	4396.3	3964.9	4180.6	P	P	0.000244	0.000244	0.2	0.2	0.1	0.2	0.175	0.05	NC	NC	NC	NC	4	0	0	NC	NC	3893.3	4264.1	4078.7	P	P
256647_at	AT3G13620;AT3G13610	12	4	4	4			NC	D	NC	NC			NC	256647_at	3339.6	3601.1	3470.35	P	P	0.000244	0.000244	2692.1	3376.2	3034.15	P	P	0.000244	0.000244	-0.3	-0.3	0	0	-0.15	0.173205	D	D	NC	NC	2	0	0.3	NC	I	3516.2	2981.9	3249.05	P	P
256785_at	AT3G13720	12	4	4	4		NC	NC	D	NC	NC	NC	NC	NC	256785_at	2542.9	2132.8	2337.85	P	P	0.000244	0.000244	1854.3	2256.8	2055.55	P	P	0.000244	0.000244	-0.3	-0.1	-0.2	0.2	-0.1	0.216025	D	NC	NC	NC	1	-0.4	0.1	NC	NC	2621.5	2134.4	2377.95	P	P
256787_at	AT3G13790	12	4	4	4			NC	NC	NC	NC	I	NC	NC	256787_at	2506.3	2035.9	2271.1	P	P	0.000244	0.000244	2518.3	2925.1	2721.7	P	P	0.000244	0.000244	0.1	0.2	0.4	0.5	0.3	0.182574	NC	NC	I	I	2	-0.2	0.2	NC	I	2276.1	2566.8	2421.45	P	P
258201_at	AT3G13910	12	4	4	4				D	NC	NC		NC	NC	258201_at	1681.7	1151.5	1416.6	P	P	0.000244	0.000244	803.1	1233.3	1018.2	P	P	0.000244	0.000244	-0.9	-0.5	-0.4	-0.1	-0.475	0.330404	D	D	D	NC	3	-0.4	0.4	D	I	1709.9	1511.7	1610.8	P	P
257007_at	AT3G14205	12	4	4	4		NC	NC	I	NC	NC	NC	NC	NC	257007_at	577.1	606.3	591.7	P	P	0.000244	0.000244	945.8	824.1	884.95	P	P	0.000244	0.000244	0.6	0.3	0.4	0.3	0.4	0.141421	I	I	NC	NC	2	0.2	-0.2	NC	NC	645.4	595.5	620.45	P	P
257008_at	AT3G14210	12	4	4	4		NC	NC			NC	D	NC	NC	257008_at	2549.7	3143.4	2846.55	P	P	0.000244	0.000244	3556.9	3541.8	3549.35	P	P	0.000244	0.000244	0.4	0.3	0.3	0.2	0.3	0.0816497	I	I	I	NC	3	0.1	-0.1	NC	NC	2458.4	2316	2387.2	P	P
258362_at	AT3G14280	12	4	4	4		NC					I	NC	NC	258362_at	1384.1	1260.9	1322.5	P	P	0.000244	0.000244	918.6	965.5	942.05	P	P	0.000244	0.000244	-0.9	-0.4	-0.7	-0.3	-0.575	0.275379	D	D	D	NC	3	-0.5	0.1	D	NC	1645.3	1207	1426.15	P	P
257279_at	AT3G14430	12	4	4	4			NC	D	NC	NC	NC	NC	NC	257279_at	2411.6	2039.3	2225.45	P	P	0.000244	0.000244	1872.5	2291.7	2082.1	P	P	0.000244	0.000244	-0.4	-0.2	-0.1	0.2	-0.125	0.25	D	NC	NC	NC	1	-0.2	0.3	NC	I	2861.3	2732.6	2796.95	P	P
258063_at	AT3G14620	12	4	4	4	D	NC	NC			NC	I	NC	NC	258063_at	3941.3	4213.1	4077.2	P	P	0.000244	0.000244	2873.1	2812.3	2842.7	P	P	0.000244	0.000244	-0.5	-0.4	-0.5	-0.5	-0.475	0.05	D	D	D	D	4	0	-0.1	NC	NC	3834.8	3653.9	3744.35	P	P
256599_at	AT3G14760	5	0	3	2		NC	NC		NC	NC	D	NC	NC	256599_at	171.4	138.5	154.95	A	A	0.303711	0.303711	325.9	204.2	265.05	A	A	0.111572	0.067627	0.6	1.1	0.2	0.9	0.7	0.391578	I	I	NC	NC	2	-0.7	-0.3	NC	NC	282.4	245.1	263.75	P	A
257211_at	AT3G15080	12	4	4	4		NC	NC	I	NC	NC	NC	NC	NC	257211_at	812.2	767.5	789.85	P	P	0.000732	0.000732	1150.6	767.4	959	P	P	0.000244	0.000244	0.5	0.3	-0.1	0	0.175	0.275379	I	I	NC	NC	2	0.1	-0.5	NC	NC	730.4	776.4	753.4	P	P
257236_at	AT3G15095	12	4	4	4	I	NC	NC	I	NC	NC	NC	NC	NC	257236_at	605.1	737.5	671.3	P	P	0.030273	0.023926	917.5	804	860.75	P	P	0.01416	0.008057	0.4	0.5	0.3	0.5	0.425	0.0957427	I	I	I	I	4	-0.1	-0.1	NC	NC	715.1	585.6	650.35	P	P
256858_at	AT3G15140	8	2	2	4	NC	NC	NC	I	NC	NC	NC	NC	NC	256858_at	175.7	231.4	203.55	A	P	0.129639	0.046143	263.2	263.7	263.45	A	P	0.080566	0.046143	0.4	0.2	0.7	0.3	0.4	0.216025	NC	NC	NC	NC	4	0.3	0.2	NC	NC	219.8	107.6	163.7	M	A
257053_at	AT3G15210	12	4	4	4	D	NC	NC	D	NC	NC		NC	NC	257053_at	1452.4	1269.2	1360.8	P	P	0.000244	0.000732	781.6	903.4	842.5	P	P	0.00293	0.001953	-0.6	-0.4	-0.4	-0.5	-0.475	0.0957427	D	D	D	D	4	-0.1	-0.1	NC	NC	1258.2	1214.1	1236.15	P	P
257057_at	AT3G15310;AT5G32621	12	4	4	4			NC		NC	NC	I	NC	NC	257057_at	362	293.6	327.8	P	P	0.000732	0.000244	217.4	155.4	186.4	P	P	0.000244	0.001953	-0.4	-0.5	-1	-0.7	-0.65	0.264575	NC	NC	D	D	2	0.1	-0.5	NC	D	333	358.9	345.95	P	P
257054_at	AT3G15353	12	4	4	4		NC	NC	D	NC	NC	NC	NC	NC	257054_at	31853.4	30130.5	30992	P	P	0.000244	0.000244	27591	28513.8	28052.4	P	P	0.000244	0.000244	-0.2	-0.1	-0.2	-0.1	-0.15	0.057735	D	NC	NC	NC	1	-0.1	0	NC	NC	28152.5	30133.4	29143	P	P
258385_at	AT3G15510	7	3	3	1		NC	NC	D	NC	NC	NC	NC	NC	258385_at	489.5	370.6	430.05	P	P	0.023926	0.023926	258.9	267.4	263.15	A	P	0.129639	0.037598	-0.7	-0.5	-0.7	-0.3	-0.55	0.191485	NC	D	NC	NC	3	-0.1	0.1	NC	NC	475.9	596.6	536.25	P	P
258386_at	AT3G15520	12	4	4	4		NC	NC	I	NC	NC	D	NC	NC	258386_at	1451.3	1506.9	1479.1	P	P	0.000244	0.000244	2310.1	1810.8	2060.45	P	P	0.000244	0.000244	0.3	0.3	0.3	0.2	0.275	0.05	I	I	NC	MI	2	0.1	0	NC	NC	1368.4	1259.2	1313.8	P	P
258394_at	AT3G15530	12	4	4	4	NC	NC	NC	D	NC	NC	NC	NC	NC	258394_at	2736.6	2636.1	2686.35	P	P	0.000244	0.000244	2428.2	2294	2361.1	P	P	0.000732	0.000244	-0.2	-0.1	-0.3	-0.2	-0.2	0.0816497	NC	NC	NC	NC	4	-0.1	-0.1	NC	NC	2526.3	3003.5	2764.9	P	P
258270_at	AT3G15650	12	4	4	4	NC	NC	NC		NC	NC	D	NC	NC	258270_at	450.3	614.6	532.45	P	P	0.001221	0.001953	503	564.1	533.55	P	P	0.001953	0.000732	0	-0.3	0.3	0.1	0.025	0.25	NC	NC	NC	NC	4	0.2	0.3	NC	NC	551.2	632.9	592.05	P	P
258222_at	AT3G15680	12	4	4	4	I	NC	NC		NC	NC		NC	NC	258222_at	905.3	1123.9	1014.6	P	P	0.000244	0.000732	1568.2	1340	1454.1	P	P	0.000732	0.000244	0.3	0.4	0.2	0.5	0.35	0.129099	I	I	I	I	4	-0.2	-0.1	NC	NC	1316.1	1279.2	1297.65	P	P
258252_at	AT3G15720	11	4	3	4	NC		NC		NC		I	NC	NC	258252_at	234.4	249.3	241.85	P	P	0.001953	0.001953	188.8	308.3	248.55	P	P	0.005859	0.001221	-0.2	-0.4	0.3	0.2	-0.025	0.330404	NC	NC	NC	NC	4	-0.2	0.5	NC	MI	191.5	260.6	226.05	P	P
258333_at	AT3G16000	12	4	4	4		NC	NC	I	NC	NC	NC	NC	NC	258333_at	1426.9	1616.8	1521.85	P	P	0.00415	0.005859	1827	1667.7	1747.35	P	P	0.001221	0.000244	0.7	0.5	0.3	0.1	0.4	0.258199	I	I	I	NC	3	0.1	-0.3	NC	NC	1550.8	1103.1	1326.95	P	P
258338_at	AT3G16150	12	4	4	4	I	NC	NC	NC	NC	NC		NC		258338_at	522.4	487.7	505.05	P	P	0.001953	0.000732	837.8	673.5	755.65	P	P	0.000732	0.000244	0.9	0.8	0.5	0.4	0.65	0.238048	I	I	I	I	4	0.1	-0.4	NC	NC	458.2	451.1	454.65	P	P
258051_at	AT3G16260	12	4	4	4		NC	NC	I	NC	NC		NC	NC	258051_at	693.9	907.5	800.7	P	P	0.001953	0.005859	866.4	1024.4	945.4	P	P	0.00293	0.001953	0.3	0.3	0.2	0	0.2	0.141421	I	I	NC	NC	2	0.1	-0.1	NC	NC	892.8	877.6	885.2	P	P
258048_at	AT3G16290	12	4	4	4		NC	NC	I	NC	NC	NC	NC	NC	258048_at	862.9	934.2	898.55	P	P	0.000732	0.000732	1341.9	1069.4	1205.65	P	P	0.000244	0.000244	0.4	0.2	0.4	0	0.25	0.191485	I	NC	NC	NC	1	0.2	0	NC	NC	948.2	725.4	836.8	P	P
259375_at	AT3G16370	12	4	4	4	I	NC	NC		NC		NC	NC	NC	259375_at	7629.3	7839.2	7734.25	P	P	0.000244	0.000244	10523.9	9936.7	10230.3	P	P	0.000244	0.000244	0.4	0.4	0.4	0.4	0.4	0	I	I	I	I	4	0	0	NC	NC	8483.3	7426	7954.65	P	P
259381_s_at	AT3G16390	12	4	4	4		NC	NC			NC	I	NC	NC	259381_s_at	21442.8	20771.1	21107	P	P	0.000732	0.000732	17419.5	20041.8	18730.7	P	P	0.000732	0.000732	-0.3	-0.3	-0.1	0	-0.175	0.15	D	D	NC	NC	2	0	0.2	NC	NC	18124.8	18420.4	18272.6	P	P
259384_at	AT3G16450	12	4	4	4		NC	NC			NC	I	NC	NC	259384_at	9652.3	7585.4	8618.85	P	P	0.000732	0.000244	7688.5	7300.1	7494.3	P	P	0.000732	0.000244	-0.3	-0.2	-0.1	0	-0.15	0.129099	D	NC	NC	NC	1	-0.1	0.1	NC	NC	7041.1	9284.6	8162.85	P	P
259327_at	AT3G16460	12	4	4	4		NC	NC		NC	NC	I	NC	NC	259327_at	16663.1	14852.6	15757.9	P	P	0.000244	0.000244	13072.6	15931.7	14502.1	P	P	0.000244	0.000244	-0.3	-0.2	-0.2	0	-0.175	0.125831	D	D	NC	NC	2	-0.1	0.2	NC	NC	16090.5	14143.4	15117	P	P
259383_at	AT3G16470	12	4	4	4	NC		NC			NC	I	NC	NC	259383_at	6594.3	7195	6894.65	P	P	0.000244	0.000244	8003.8	5905.8	6954.8	P	P	0.000244	0.000244	0.2	0.2	-0.1	-0.3	1.38778e-17	0.244949	NC	NC	NC	NC	4	0	-0.4	NC	D	5780.4	5561.6	5671	P	P
258432_at	AT3G16570	12	4	4	4				D	NC	NC	NC	NC	NC	258432_at	2670.7	2269.5	2470.1	P	P	0.000244	0.000244	1829.8	2283.4	2056.6	P	P	0.000244	0.000244	-0.7	-0.4	-0.5	-0.1	-0.425	0.25	D	D	D	NC	3	-0.3	0.3	D	I	2707	3189.7	2948.35	P	P
258436_at	AT3G16720	12	4	4	4		NC	NC	D	NC	NC	NC	NC	NC	258436_at	759	816.4	787.7	P	P	0.000244	0.00293	491.5	485.8	488.65	P	P	0.005859	0.000244	-0.6	-0.4	-0.5	-0.6	-0.525	0.0957427	D	D	D	NC	3	-0.1	-0.2	NC	NC	736.2	743.1	739.65	P	P
258434_at	AT3G16770	10	4	4	2	D	NC	NC	D	NC	NC	I	NC		258434_at	1850	1819.9	1834.95	P	P	0.008057	0.008057	865.6	722.5	794.05	P	P	0.030273	0.018555	-1.2	-0.9	-1.5	-1.2	-1.2	0.244949	D	D	D	D	4	-0.1	-0.3	NC	NC	1460.6	1661.1	1560.85	P	P
257895_at	AT3G16950	12	4	4	4		NC	NC	I	NC	NC		NC	NC	257895_at	1012	1253.9	1132.95	P	P	0.000732	0.000732	1601.4	1234.8	1418.1	P	P	0.000732	0.000732	0.5	0.4	0.4	0.2	0.375	0.125831	I	MI	I	NC	2	0.1	-0.2	NC	NC	1044	1134.8	1089.4	P	P
257879_at	AT3G17160	12	4	4	4		NC	NC	I	NC	NC		NC	NC	257879_at	368.5	418.8	393.65	P	P	0.000244	0.000244	597.8	541.7	569.75	P	P	0.000244	0.000244	0.5	0.4	0.7	0.3	0.475	0.170783	I	I	I	NC	3	0.1	-0.2	NC	NC	442.6	467.1	454.85	P	P
258350_at	AT3G17510	12	4	4	4			NC	I	NC	NC	D	NC	NC	258350_at	1102.2	999.9	1051.05	P	P	0.000732	0.000732	1533.7	1015.4	1274.55	P	P	0.000244	0.000244	0.6	0.5	0	0.1	0.3	0.294392	I	I	NC	NC	2	0.1	-0.5	NC	D	865.5	866.2	865.85	P	P
258158_at	AT3G17790;AT3G17800	12	4	4	4	D		NC	D	NC	NC	NC	NC	NC	258158_at	6689.1	6391.4	6540.25	P	P	0.000244	0.000244	3010.5	4319	3664.75	P	P	0.000244	0.000244	-0.9	-0.9	-0.5	-0.5	-0.7	0.23094	D	D	D	D	4	-0.1	0.5	NC	I	5271.1	5758.4	5514.75	P	P
258215_at	AT3G17970	12	4	4	4	NC	NC	NC	I	NC	NC	NC	NC	NC	258215_at	539.7	593.5	566.6	P	P	0.018555	0.00415	545.2	623.6	584.4	P	P	0.008057	0.008057	0.2	0	0.1	0	0.075	0.0957427	NC	NC	NC	NC	4	0.3	0	NC	NC	640.1	552.6	596.35	P	P
258149_at	AT3G18110	12	4	4	4		NC	NC	I	NC	NC	NC	NC	NC	258149_at	942.4	1183.7	1063.05	P	P	0.001221	0.001221	1442.9	1097.1	1270	P	P	0.000732	0.000732	0.5	0.3	0.2	-0.1	0.225	0.25	I	I	NC	NC	2	0.1	-0.4	NC	NC	935.1	948.6	941.85	P	P
258155_at	AT3G18130	12	4	4	4		NC	NC		NC	NC	D	NC	NC	258155_at	6013.1	7017.8	6515.45	P	P	0.000244	0.000244	8299	7125	7712	P	P	0.000244	0.000244	0.3	0.2	0.2	0.1	0.2	0.0816497	I	NC	NC	NC	1	0.1	-0.1	NC	NC	6453.4	8398.4	7425.9	P	P
258154_at	AT3G18210	12	4	4	4		NC	NC	I	NC	NC	NC	NC	NC	258154_at	490	603.3	546.65	P	P	0.001221	0.001221	760.3	656.7	708.5	P	P	0.000732	0.000732	0.6	0.3	0.5	0.3	0.425	0.15	I	NC	NC	NC	1	0.3	-0.2	NC	NC	495.5	484.3	489.9	P	P
257062_at	AT3G18290	12	4	4	4	I		NC	I	NC	NC	NC	NC	NC	257062_at	757.9	868.2	813.05	P	P	0.000244	0.000244	1615.4	1146.6	1381	P	P	0.000244	0.000244	1	0.9	0.6	0.4	0.725	0.275379	I	I	I	I	4	0.1	-0.4	NC	D	895.5	936	915.75	P	P
257717_at	AT3G18390	12	4	4	4		NC	NC	I	NC	NC		NC	NC	257717_at	1376.6	1845.8	1611.2	P	P	0.000244	0.000244	2152.7	1711.1	1931.9	P	P	0.000244	0.000244	0.7	0.4	0.4	0.1	0.4	0.244949	I	I	I	NC	3	0.2	-0.3	NC	NC	1522.3	1465	1493.65	P	P
256853_at	AT3G18640	11	3	4	4		NC		I	NC	NC	NC	NC	NC	256853_at	245.4	369.9	307.65	M	P	0.056152	0.023926	550.3	481.4	515.85	P	P	0.01416	0.00415	0.9	0.4	0.6	0.2	0.525	0.298608	I	NC	I	NC	2	0.3	-0.2	I	NC	438.9	322.8	380.85	P	P
257801_at	AT3G18750	12	4	4	4		NC	NC	I	NC	NC	NC	NC	NC	257801_at	264	213.8	238.9	P	P	0.001953	0.001953	381.8	243	312.4	P	P	0.00293	0.000732	0.7	0.8	0.4	0.5	0.6	0.182574	I	I	NC	NC	2	0	-0.3	NC	NC	217.2	297.6	257.4	P	P
256655_at	AT3G18890	12	4	4	4	NC	NC	NC	I	NC	NC	D	NC	NC	256655_at	2132.3	2156.4	2144.35	P	P	0.000244	0.000244	2212.3	2338.6	2275.45	P	P	0.000244	0.000244	0.2	0.2	0.2	0.2	0.2	0	NC	NC	NC	NC	4	0	0	NC	NC	1977.5	1984.3	1980.9	P	P
256918_s_at	AT3G18960	12	4	4	4		NC	NC	I	NC	NC	NC	NC	NC	256918_s_at	179.1	202.3	190.7	P	P	0.000244	0.000244	379.8	239.6	309.7	P	P	0.000244	0.000244	0.9	0.6	0.5	0.4	0.6	0.216025	I	I	I	NC	3	0.1	-0.5	NC	NC	246.4	170	208.2	P	P
256922_at	AT3G19010	12	4	4	4	D	NC	NC			NC	I	NC	NC	256922_at	2755.9	2344.2	2550.05	P	P	0.000244	0.000244	1626.5	2027.8	1827.15	P	P	0.000244	0.000244	-0.8	-0.4	-0.5	-0.3	-0.5	0.216025	D	D	D	D	4	-0.3	0.3	NC	NC	3407.2	3084.1	3245.65	P	P
257024_at	AT3G19100	12	4	4	4	NC	NC	NC	I	NC	NC	NC	NC	NC	257024_at	1192.7	1119.4	1156.05	P	P	0.001953	0.001953	1327.1	1277.6	1302.35	P	P	0.001953	0.001953	0.3	0.2	0.5	0.1	0.275	0.170783	NC	NC	NC	NC	4	0.1	-0.2	NC	NC	1088.8	1079.2	1084	P	P
257033_at	AT3G19170	12	4	4	4	NC	NC	NC	I	NC	NC	NC	NC	NC	257033_at	4027	4386.1	4206.55	P	P	0.000244	0.000244	5105.2	4459.1	4782.15	P	P	0.000244	0.000244	0.3	0.3	0	0	0.15	0.173205	NC	NC	NC	NC	4	0	-0.2	NC	NC	3957.1	3904.1	3930.6	P	P
258015_at	AT3G19340	12	4	4	4		NC	NC	I	NC	NC	NC	NC	NC	258015_at	1017.7	985.1	1001.4	P	P	0.000244	0.001221	1345.3	1212.1	1278.7	P	P	0.001953	0.000244	0.4	0.3	0.5	0.4	0.4	0.0816497	NC	NC	I	NC	3	0.1	0	NC	NC	952.1	1009.2	980.65	P	P
258017_at	AT3G19370	12	4	4	4		NC	NC	I	NC	NC	NC	NC	NC	258017_at	294.8	388.8	341.8	P	P	0.001953	0.000244	478.2	443.1	460.65	P	P	0.000244	0.000244	0.8	0.4	0.6	0.5	0.575	0.170783	I	MI	I	NC	2	0.2	0.2	NC	NC	341.4	259.6	300.5	P	P
257937_at	AT3G19800;AT3G19810	12	4	4	4		NC		I	NC	NC	NC	NC	NC	257937_at	821.3	1108.5	964.9	P	P	0.00415	0.001221	1339.6	1151.9	1245.75	P	P	0.001221	0.001221	0.6	0.2	0.4	-0.1	0.275	0.298608	I	NC	NC	NC	1	0.3	-0.3	I	NC	1039.9	1031.6	1035.75	P	P
256623_at	AT3G19960	12	4	4	4		NC		I	NC	NC	NC	NC	NC	256623_at	368.3	517	442.65	P	P	0.005859	0.000244	649.3	491.3	570.3	P	P	0.000244	0.000244	0.5	0.2	0.3	-0.3	0.175	0.340343	I	NC	I	NC	2	0.4	-0.5	I	NC	531.2	504.5	517.85	P	P
257129_at	AT3G20080;AT3G20100	12	4	4	4		NC	NC			NC	I	NC	NC	257129_at	1183.8	1003.9	1093.85	P	P	0.001953	0.00293	686.3	1103.7	895	P	P	0.018555	0.00415	-0.8	-0.6	-0.5	-0.3	-0.55	0.208167	D	D	D	NC	3	-0.1	0.1	NC	NC	1035.3	1225.2	1130.25	P	P
257122_at	AT3G20250	12	4	4	4	NC	NC	NC			NC	I	NC	NC	257122_at	962.6	1011.6	987.1	P	P	0.000244	0.000244	1023.2	1039.9	1031.55	P	P	0.000244	0.000244	0.1	0.1	0	0.1	0.075	0.05	NC	NC	NC	NC	4	0.1	0	NC	NC	930	807.6	868.8	P	P
257663_at	AT3G20260	9	3	2	4	NC	NC	NC	I	NC	NC	NC	NC	NC	257663_at	182.4	228.4	205.4	A	P	0.171387	0.046143	355.4	265.9	310.65	P	P	0.037598	0.023926	0.9	0.6	0.8	0.2	0.625	0.30957	NC	NC	NC	NC	4	0.7	-0.2	NC	NC	246.9	208.4	227.65	M	A
257670_at	AT3G20340	9	2	4	3	D	NC	NC		NC	NC	D	NC	NC	257670_at	460.9	321.4	391.15	P	P	0.000732	0.000732	20	52.9	36.45	A	A	0.533936	0.246094	-4.9	-3.2	-2.5	-1.7	-3.075	1.36229	D	D	D	D	4	-0.7	1.8	NC	NC	365.2	311.6	338.4	P	P
257673_at	AT3G20370	12	4	4	4	NC	NC	NC		NC	NC	I	NC	NC	257673_at	6671.5	7360.8	7016.15	P	P	0.000244	0.000244	6362	7099.6	6730.8	P	P	0.000244	0.000244	-0.1	-0.2	0	0	-0.075	0.0957427	NC	NC	NC	NC	4	0.1	0.1	NC	NC	7396.2	6251.7	6823.95	P	P
257088_at	AT3G20510	12	4	4	4			NC	D	NC	NC	I	NC	NC	257088_at	4661	4591.1	4626.05	P	P	0.000244	0.000244	3497.2	4198.1	3847.65	P	P	0.000244	0.000244	-0.5	-0.4	-0.2	-0.1	-0.3	0.182574	D	D	NC	NC	2	-0.1	0.3	NC	I	4558.9	4134.8	4346.85	P	P
256666_at	AT3G20670	12	4	4	4	I	NC	NC		NC	NC	NC	NC	NC	256666_at	3203.5	2881.9	3042.7	P	P	0.000244	0.000244	4240.9	4265.1	4253	P	P	0.000244	0.000244	0.4	0.4	0.5	0.4	0.425	0.05	I	I	I	I	4	0	0	NC	NC	3524.3	3187.6	3355.95	P	P
256805_at	AT3G20930	12	4	4	4	NC	NC	NC	I	NC	NC	NC	NC	NC	256805_at	859.3	766.3	812.8	P	P	0.000732	0.000244	1113	832.6	972.8	P	P	0.000244	0.000244	0.3	0.2	0.2	0	0.175	0.125831	NC	NC	NC	NC	4	0	-0.1	NC	NC	661.1	721.7	691.4	P	P
256979_at	AT3G21055	12	4	4	4	NC	NC				NC	D	NC	NC	256979_at	38597.2	33382.4	35989.8	P	P	0.000244	0.000244	35223	32040.7	33631.8	P	P	0.000244	0.000244	-0.1	0.1	-0.2	0	-0.05	0.129099	NC	NC	NC	NC	4	-0.2	-0.1	D	NC	36176.1	34541.1	35358.6	P	P
258040_at	AT3G21190	12	4	4	4	I	NC	NC		NC		NC	NC	NC	258040_at	1340.1	1400.4	1370.25	P	P	0.000244	0.000244	1817.6	1854.8	1836.2	P	P	0.000244	0.000244	0.6	0.5	0.5	0.4	0.5	0.0816497	I	I	I	I	4	0.1	0.1	NC	NC	1644.8	1155.3	1400.05	P	P
258037_at	AT3G21230	12	4	4	4		NC	NC	D	NC	NC			NC	258037_at	809.2	909.3	859.25	P	P	0.001221	0.000244	810.6	764.8	787.7	P	P	0.00293	0.000732	-0.3	-0.6	0	-0.1	-0.25	0.264575	D	D	NC	NC	2	0.2	0.3	NC	NC	992.9	1000.7	996.8	P	P
258173_at	AT3G21630	12	4	4	4	NC	NC	NC	NC	NC	NC	I	NC	NC	258173_at	1165.7	1113.2	1139.45	P	P	0.000244	0.000244	1376.8	1334.4	1355.6	P	P	0.000244	0.000244	0.3	0.3	0.2	0.2	0.25	0.057735	NC	NC	NC	NC	4	0	0	NC	NC	993.5	884.5	939	P	P
257264_at	AT3G22060	12	4	4	4	D	NC	NC	NC	NC	NC		NC	NC	257264_at	1061.7	1025.3	1043.5	P	P	0.000244	0.000244	792.8	752.7	772.75	P	P	0.000244	0.000732	-0.7	-0.4	-0.7	-0.7	-0.625	0.15	D	D	D	D	4	-0.2	-0.1	NC	NC	1229.4	1286	1257.7	P	P
256792_at	AT3G22150	12	4	4	4		NC		I	NC	NC		NC	NC	256792_at	289.3	371.6	330.45	P	P	0.030273	0.00415	600.9	301.3	451.1	P	P	0.00415	0.001953	1	0.5	0.4	0.1	0.5	0.374166	I	I	I	NC	3	0.5	-0.5	I	NC	332.3	301.3	316.8	P	P
256823_at	AT3G22220	12	4	4	4	NC	NC	NC	I	NC	NC	NC	NC	NC	256823_at	426.1	440.1	433.1	P	P	0.001953	0.010742	480.6	377.1	428.85	P	P	0.005859	0.001221	0.2	0	0	-0.1	0.025	0.125831	NC	NC	NC	NC	4	0.1	-0.2	NC	NC	354.4	456.5	405.45	P	P
256617_at	AT3G22240	12	4	4	4			NC	D	NC	NC		NC	NC	256617_at	24759	22765.4	23762.2	P	P	0.000244	0.000244	21624.3	27025.1	24324.7	P	P	0.000244	0.000244	-0.2	-0.1	0.1	0.2	-6.93889e-18	0.182574	D	NC	NC	NC	1	-0.1	0.3	NC	I	22579	24260.2	23419.6	P	P
256927_at	AT3G22550	12	4	4	4		NC	NC	D	NC	NC	NC	NC	NC	256927_at	1335	1225.6	1280.3	P	P	0.000244	0.000244	1168.4	1062.6	1115.5	P	P	0.010742	0.000244	-0.4	-0.3	-0.2	-0.2	-0.275	0.0957427	D	D	NC	NC	2	0	0.1	NC	NC	1193.8	1321.9	1257.85	P	P
258326_at	AT3G22760	12	4	4	4		NC	NC	I	NC	NC	NC	NC	NC	258326_at	269.6	327.9	298.75	P	P	0.000244	0.001953	459.1	466.1	462.6	P	P	0.000244	0.000244	0.7	0.4	0.4	0.3	0.45	0.173205	NC	I	NC	I	2	-0.3	-0.2	NC	NC	273.9	429.9	351.9	P	P
258324_at	AT3G22780	12	4	4	4		NC	NC	I	NC	NC	NC	NC	NC	258324_at	640.4	798.9	719.65	P	P	0.001953	0.000244	830.1	814.8	822.45	P	P	0.000244	0.000732	0.4	0.6	0.3	0.2	0.375	0.170783	NC	I	NC	NC	3	0.2	-0.2	NC	NC	708.1	640.5	674.3	P	P
258341_at	AT3G22780;AT3G22790	12	4	4	4	I	NC	NC		NC	NC	NC	NC	NC	258341_at	239.6	276.5	258.05	P	P	0.00293	0.000732	345.8	399.2	372.5	P	P	0.000244	0.000244	0.9	0.6	0.7	0.7	0.725	0.125831	I	I	I	I	4	0.4	-0.1	NC	NC	204.7	240.3	222.5	P	P
256829_at	AT3G22850	12	4	4	4			NC	D	NC	NC	NC	NC	NC	256829_at	4160.8	4116.6	4138.7	P	P	0.000244	0.000244	4026.6	5326.7	4676.65	P	P	0.00293	0.000244	-0.3	-0.3	-0.1	0	-0.175	0.15	D	D	NC	NC	2	0	0.2	NC	I	3855.3	5495	4675.15	P	P
257771_at	AT3G23000	12	4	4	4			NC	I	NC	NC	NC	NC	NC	257771_at	2496.5	2613	2554.75	P	P	0.000244	0.000244	3993.9	2872.1	3433	P	P	0.000244	0.000244	0.7	0.7	0.4	0.3	0.525	0.206155	I	I	I	NC	3	0	-0.4	NC	D	2377.4	2301.7	2339.55	P	P
257759_at	AT3G23070	12	4	4	4	NC	NC	NC	I	NC	NC	NC	NC	NC	257759_at	479.5	611.2	545.35	P	P	0.018555	0.008057	640.1	536	588.05	P	P	0.008057	0.005859	0.4	0.3	0.2	0	0.225	0.170783	NC	NC	NC	NC	4	0.2	-0.4	NC	NC	494.2	540.7	517.45	P	P
257925_at	AT3G23170	12	4	4	4	D		NC	D	NC	NC	NC	NC	NC	257925_at	857.7	757.5	807.6	P	P	0.000244	0.000244	411.5	518.5	465	P	P	0.00415	0.000244	-0.9	-0.8	-0.7	-0.5	-0.725	0.170783	D	D	D	D	4	-0.3	0.4	NC	I	629.8	773.7	701.75	P	P
257176_s_at	AT3G23510;AT3G23530	12	4	4	4		NC	NC	I	NC	NC	NC	NC	NC	257176_s_at	823.2	1042.8	933	P	P	0.001953	0.001953	1430.7	1241.8	1336.25	P	P	0.001953	0.001953	0.5	0.3	0.5	0.2	0.375	0.15	I	NC	I	NC	2	0.3	-0.1	NC	NC	859.8	1236.9	1048.35	P	P
258125_s_at	AT3G23530	12	4	4	4	NC	NC	NC	I	NC	NC		NC	NC	258125_s_at	163.1	240.6	201.85	P	P	0.037598	0.037598	219.4	233.7	226.55	P	P	0.010742	0.005859	0.2	0.2	0.3	0.2	0.225	0.05	NC	NC	NC	NC	4	0.4	0	NC	NC	252.4	222.8	237.6	P	P
258108_at	AT3G23570	12	4	4	4	NC	NC	NC			NC	I	NC	NC	258108_at	2748.7	2726	2737.35	P	P	0.001953	0.001953	2861	2593.1	2727.05	P	P	0.001953	0.001953	0	0	-0.2	-0.2	-0.1	0.11547	NC	NC	NC	NC	4	0	-0.2	NC	NC	3223.2	3191.4	3207.3	P	P
258102_at	AT3G23600	12	4	4	4		NC	NC	D	NC	NC		NC	NC	258102_at	10386.1	9309.8	9847.95	P	P	0.000244	0.000244	7283.7	8188.4	7736.05	P	P	0.000244	0.000244	-0.5	-0.4	-0.3	-0.2	-0.35	0.129099	D	D	NC	NC	2	-0.1	0.2	NC	NC	9115.6	9042.7	9079.15	P	P
257172_at	AT3G23700	12	4	4	4	NC	NC	NC	I	NC	NC	D	NC	NC	257172_at	4358.9	4764.9	4561.9	P	P	0.000244	0.000244	5198.4	4411	4804.7	P	P	0.000244	0.000244	0.2	0.2	0	-0.1	0.075	0.15	NC	NC	NC	NC	4	0.1	-0.2	NC	NC	4239.7	3971.7	4105.7	P	P
257203_at	AT3G23730	12	4	4	4	NC	NC	NC	I	NC	NC	NC		NC	257203_at	936.7	982	959.35	P	P	0.000244	0.000244	1015.6	1020.6	1018.1	P	P	0.000244	0.000244	-0.1	0	0.1	0	0	0.0816497	NC	NC	NC	NC	4	0.1	0	NC	NC	1035.9	988.4	1012.15	P	P
257197_at	AT3G23800	10	4	4	2		NC	NC		NC	NC	I	NC	NC	257197_at	477.1	291.3	384.2	P	P	0.001953	0.01416	339.2	297.7	318.45	P	P	0.008057	0.001953	-0.5	-0.1	-0.3	0	-0.225	0.221736	D	NC	NC	NC	1	-0.4	0	NC	NC	322.1	305.6	313.85	P	P
257204_at	AT3G23805	12	4	4	4	NC	NC	NC	D	NC	NC		NC	NC	257204_at	1188.4	1187.1	1187.75	P	P	0.000244	0.000244	968.4	1091.8	1030.1	P	P	0.000244	0.000244	-0.2	0	0.1	0.2	0.025	0.170783	NC	NC	NC	NC	4	-0.1	0.1	NC	NC	1155.8	1258.8	1207.3	P	P
256915_at	AT3G23900	12	4	4	4		NC	NC	I	NC	NC	NC	NC	NC	256915_at	654.6	591.7	623.15	P	P	0.000732	0.001221	970.5	655.5	813	P	P	0.000732	0.001221	0.6	0.5	0.4	0.2	0.425	0.170783	I	NC	NC	NC	1	0.2	-0.3	NC	NC	552.6	482.3	517.45	P	P
256910_at	AT3G24080	12	4	4	4		NC	NC	I	NC	NC	NC	NC	NC	256910_at	911	1086.6	998.8	P	P	0.001221	0.00293	1324.1	943.9	1134	P	P	0.001221	0.001953	0.6	0.3	0.2	0	0.275	0.25	I	NC	NC	NC	1	0.3	-0.3	NC	NC	713.7	965.1	839.4	P	P
256618_at	AT3G24440	12	4	4	4		NC	NC	I	NC	NC	NC	NC	NC	256618_at	399.2	353.3	376.25	P	P	0.030273	0.008057	430.7	414.4	422.55	P	P	0.00293	0.001953	0.3	0.3	0.2	0.1	0.225	0.0957427	I	NC	NC	NC	1	-0.1	-0.2	NC	NC	272.3	421.8	347.05	P	P
258126_at	AT3G24490	12	4	4	4		NC	NC	I	NC	NC	NC	NC	NC	258126_at	593.2	514.5	553.85	P	P	0.000244	0.000244	750.5	597.6	674.05	P	P	0.000244	0.000244	0.6	0.5	0.3	0.2	0.4	0.182574	I	I	NC	NC	2	0.1	-0.4	NC	NC	562.7	473.4	518.05	P	P
258133_at	AT3G24500	12	4	4	4	NC	NC	NC		NC		I	NC	NC	258133_at	1646.4	1500.2	1573.3	P	P	0.000244	0.000244	1700.9	1781.9	1741.4	P	P	0.000244	0.000244	0	0.1	0.1	0.2	0.1	0.0816497	NC	NC	NC	NC	4	-0.1	0.2	NC	NC	1467.6	1238.5	1353.05	P	P
257822_at	AT3G25230	12	4	4	4		NC	NC	I	NC	NC		NC	NC	257822_at	1438.2	1973.5	1705.85	P	P	0.000244	0.000244	2436.2	2308.2	2372.2	P	P	0.000244	0.000244	0.4	0.2	0.4	0	0.25	0.191485	I	NC	NC	NC	1	0.3	-0.1	NC	NC	1850.2	1719.7	1784.95	P	P
257907_at	AT3G25470	12	4	4	4		NC	NC	I	NC	NC	NC	NC	NC	257907_at	1873.3	2177.7	2025.5	P	P	0.000244	0.000244	2590.9	2425	2507.95	P	P	0.000244	0.000244	0.3	0.1	0.3	0.1	0.2	0.11547	MI	NC	I	NC	1	0.2	-0.2	NC	NC	1984.5	1733.4	1858.95	P	P
256755_at	AT3G25600	12	4	4	4		NC	NC	D	NC	NC	NC	NC	NC	256755_at	1118.1	924.9	1021.5	P	P	0.005859	0.005859	631.5	717.6	674.55	P	P	0.018555	0.005859	-0.8	-0.7	-0.7	-0.5	-0.675	0.125831	NC	D	D	NC	2	-0.2	0.1	NC	NC	1025	799.9	912.45	P	P
256754_at	AT3G25690	12	4	4	4			NC	I	NC	NC	NC	NC	NC	256754_at	4961.2	5662.1	5311.65	P	P	0.000244	0.000244	6710.1	5509	6109.55	P	P	0.000244	0.000244	0.6	0.4	0.2	0	0.3	0.258199	I	I	NC	NC	2	0.2	-0.4	NC	D	5021.8	3811.8	4416.8	P	P
258074_at	AT3G25890	12	4	4	4	NC	NC	NC	I	NC	NC	NC	NC	NC	258074_at	966.3	1089.3	1027.8	P	P	0.000732	0.000732	1225.6	1124.1	1174.85	P	P	0.000732	0.000732	0.4	0.2	0.3	0.1	0.25	0.129099	NC	NC	NC	NC	4	0.2	-0.2	NC	NC	864.5	823.8	844.15	P	P
257634_s_at	AT3G26180;AT3G26170	12	4	4	4	NC	NC	NC		NC	NC	I	NC	NC	257634_s_at	3380.6	2792.7	3086.65	P	P	0.000244	0.000244	2498.7	2632.8	2565.75	P	P	0.000244	0.000244	-0.3	-0.1	-0.2	-0.1	-0.175	0.0957427	NC	NC	NC	NC	4	-0.1	-0.1	NC	NC	3148.6	2857.1	3002.85	P	P
257624_at	AT3G26230;AT3G26220	12	4	4	4	NC	NC	NC			NC	I	NC	NC	257624_at	540.3	366.9	453.6	P	P	0.00415	0.001953	295.8	355.4	325.6	P	P	0.008057	0.008057	-0.2	-0.1	0.2	-0.2	-0.075	0.189297	NC	NC	NC	NC	4	0.1	0	NC	NC	396.3	422.4	409.35	P	P
257615_at	AT3G26510	12	4	4	4	D	NC	NC	D	NC	NC	D	NC	NC	257615_at	5526	5347.7	5436.85	P	P	0.000244	0.000244	3068	2584.6	2826.3	P	P	0.000244	0.000244	-0.8	-0.8	-1	-1	-0.9	0.11547	D	D	D	D	4	0	-0.2	NC	NC	4703.1	4184.5	4443.8	P	P
257314_at	AT3G26590	12	4	4	4			NC			NC	I	NC	NC	257314_at	896	882.2	889.1	P	P	0.000244	0.000244	736.3	880.3	808.3	P	P	0.000732	0.000244	-0.4	-0.4	0.1	0	-0.175	0.262996	D	D	NC	NC	2	-0.1	0.4	NC	I	1028.7	942.9	985.8	P	P
258310_at	AT3G26744	12	4	4	4		NC	NC	I	NC	NC		NC	NC	258310_at	1930.9	2108.6	2019.75	P	P	0.000732	0.000732	2588.2	2050.8	2319.5	P	P	0.000732	0.000244	0.5	0.3	0.2	0	0.25	0.208167	I	I	NC	NC	2	0.2	-0.2	NC	NC	1869.1	1887.9	1878.5	P	P
257174_at	AT3G27190	12	4	4	4		NC	NC	D	NC	NC	NC	NC	NC	257174_at	1381.1	1382.1	1381.6	P	P	0.000244	0.000244	1365.9	1381.9	1373.9	P	P	0.000244	0.000244	-0.3	-0.3	-0.1	0	-0.175	0.15	D	D	NC	NC	2	0	0.3	NC	NC	1498.3	1619.1	1558.7	P	P
257714_at	AT3G27360	12	4	4	4		NC	NC	I	NC	NC	NC	NC	NC	257714_at	527.2	563.7	545.45	P	P	0.000244	0.000244	754.6	917.2	835.9	P	P	0.000244	0.000244	0.2	0.5	0.6	0.6	0.475	0.189297	NC	I	I	I	1	-0.1	0.5	NC	NC	672.4	504.3	588.35	P	P
257227_at	AT3G27820	12	4	4	4	NC	NC	NC	I	NC	NC		NC	NC	257227_at	5713.6	5823.9	5768.75	P	P	0.000244	0.000244	5129.4	5379.3	5254.35	P	P	0.000244	0.000244	0	0.1	0.1	0	0.05	0.057735	NC	NC	NC	NC	4	0.1	-0.2	NC	NC	5705.3	5570.8	5638.05	P	P
257297_at	AT3G28040	12	4	4	4		NC	NC	I	NC	NC	NC	NC	NC	257297_at	1491.4	1557	1524.2	P	P	0.000732	0.001221	2099.1	1711.7	1905.4	P	P	0.001221	0.000732	0.4	0.3	0.4	0.2	0.325	0.0957427	I	NC	I	NC	2	0.1	0	NC	NC	1480.4	1444	1462.2	P	P
257141_at	AT3G28900	12	4	4	4		NC	NC			NC	D	NC	NC	257141_at	4284.5	4531.9	4408.2	P	P	0.000244	0.000244	5001.9	4779.3	4890.6	P	P	0.000244	0.000244	0.3	0.1	0.2	0	0.15	0.129099	I	NC	NC	NC	1	0.2	-0.1	NC	NC	4596.8	4716.1	4656.45	P	P
258003_at	AT3G29030	12	4	4	4	I	NC	NC		NC	NC		NC	NC	258003_at	667.7	530.9	599.3	P	P	0.000244	0.000244	1466	1277.5	1371.75	P	P	0.000244	0.000244	1.3	1.2	1	1.2	1.175	0.125831	I	I	I	I	4	-0.1	-0.2	NC	NC	729.2	686.9	708.05	P	P
257773_at	AT3G29185	12	4	4	4		NC	NC	I	NC	NC	NC	NC	NC	257773_at	1417.3	1480.1	1448.7	P	P	0.000244	0.000244	1801.8	1743.4	1772.6	P	P	0.000244	0.000244	0.4	0.3	0.1	0.1	0.225	0.15	I	NC	NC	NC	1	0.2	-0.1	NC	NC	1483.4	1495.8	1489.6	P	P
257744_at	AT3G29230	12	4	4	4	NC	NC	NC	I	NC	NC	NC	NC	NC	257744_at	436.5	544.2	490.35	P	P	0.000244	0.000244	538.4	488.1	513.25	P	P	0.000244	0.000732	0.5	0.3	0.4	0.1	0.325	0.170783	NC	NC	NC	NC	4	0.6	-0.2	NC	NC	597	526.6	561.8	P	P
257774_at	AT3G29250	12	4	4	4			NC	D		NC	I	NC	NC	257774_at	3026.9	2354.9	2690.9	P	P	0.000244	0.000244	2075.5	2923.7	2499.6	P	P	0.000732	0.000244	-0.7	-0.4	-0.1	0.1	-0.275	0.35	D	D	NC	NC	2	-0.3	0.5	NC	I	2892.7	2924.6	2908.65	P	P
245228_at	AT3G29810	12	4	4	4	D		NC	D	NC	NC	I	NC	NC	245228_at	1097.9	947.8	1022.85	P	P	0.000244	0.000244	499.2	765.6	632.4	P	P	0.000732	0.000244	-1.2	-1.1	-0.4	-0.4	-0.775	0.434933	D	D	D	D	4	-0.2	0.6	NC	I	901	1073.6	987.3	P	P
256598_at	AT3G30180	12	4	4	4		NC	NC			NC	I	NC	NC	256598_at	737.5	813.1	775.3	P	P	0.000244	0.000732	1171.5	1153	1162.25	P	P	0.000732	0.000244	0.5	0.5	0.2	0.4	0.4	0.141421	I	I	NC	NC	2	0	-0.2	NC	NC	957.5	1047.1	1002.3	P	P
257315_at	AT3G30775	12	4	4	4	D	NC	NC	D	NC	NC			NC	257315_at	4117.2	3637	3877.1	P	P	0.000244	0.000244	2032.1	2137.5	2084.8	P	P	0.000244	0.000244	-1.1	-0.9	-1.1	-0.8	-0.975	0.15	D	D	D	D	4	-0.1	0.1	NC	NC	3214.9	3484.6	3349.75	P	P
252785_at	AT3G42660	12	4	4	4	I	NC	NC	I	NC	NC	NC	NC	NC	252785_at	366.7	357.3	362	P	P	0.01416	0.030273	721.3	561.9	641.6	P	P	0.008057	0.005859	0.7	0.7	0.4	0.3	0.525	0.206155	I	I	I	I	4	0.1	-0.2	NC	NC	367.5	306.2	336.85	P	P
252751_at	AT3G43430	8	2	3	3	D	NC	NC		NC	NC	NC	NC	NC	252751_at	1085.4	954.2	1019.8	P	P	0.018555	0.01416	476.1	548	512.05	A	A	0.129639	0.080566	-1.2	-1.2	-1.3	-1.2	-1.225	0.05	D	D	D	D	4	-0.2	0.1	NC	NC	1049.5	773.2	911.35	P	P
252723_at	AT3G43520	12	4	4	4		NC	NC	D	NC	NC	NC	NC	NC	252723_at	5141.2	4728.3	4934.75	P	P	0.000244	0.000244	4434.4	4625.5	4529.95	P	P	0.000244	0.000244	-0.4	-0.2	-0.2	-0.1	-0.225	0.125831	D	NC	NC	NC	1	-0.2	0.1	NC	NC	5417.3	4960.5	5188.9	P	P
246328_at	AT3G43590	12	4	4	4		NC	NC	I	NC	NC	NC	NC	NC	246328_at	862.4	991.6	927	P	P	0.046143	0.018555	1131.4	964.6	1048	P	P	0.010742	0.008057	0.5	0.4	0.3	0	0.3	0.216025	I	I	I	NC	3	0.2	-0.4	NC	NC	774.3	581.1	677.7	P	P
246329_at	AT3G43610	12	4	4	4	NC	NC	NC	I	NC	NC	NC	NC	NC	246329_at	374.7	499.3	437	P	P	0.000244	0.001953	678.4	452.8	565.6	P	P	0.001953	0.001953	0.7	0.2	0.5	0	0.35	0.310913	NC	NC	NC	NC	4	0.4	-0.3	NC	NC	423.4	406.9	415.15	P	P
252712_at	AT3G43800	12	4	4	4	NC	NC	NC		NC		I	NC	NC	252712_at	2108.6	1980.6	2044.6	P	P	0.000244	0.000244	2241.8	2598.1	2419.95	P	P	0.000244	0.000244	0.1	0.1	0.1	0.1	0.1	0	NC	NC	NC	NC	4	0	0.1	NC	NC	2426.2	2080.7	2253.45	P	P
252691_at	AT3G44050	5	2	2	1	I	NC	NC	I	NC	NC		NC	NC	252691_at	68.1	102	85.05	A	A	0.366211	0.219482	148.4	153.3	150.85	P	P	0.030273	0.030273	1.1	1	0.8	0.3	0.8	0.355903	I	I	I	I	4	1.2	-0.3	NC	NC	96.8	83	89.9	A	A
252669_at	AT3G44100	12	4	4	4		NC	NC	D	NC	NC	NC	NC	NC	252669_at	3207.7	2773.6	2990.65	P	P	0.023926	0.023926	2027	2642.5	2334.75	P	P	0.023926	0.023926	-0.7	-0.3	-0.4	-0.1	-0.375	0.25	D	MD	D	NC	2	-0.3	0.1	NC	NC	3378.2	3527.7	3452.95	P	P
252678_s_at	AT3G44310;AT3G44300	12	4	4	4	NC	NC	NC	NC	NC	NC	I	NC	NC	252678_s_at	16765.9	14458.4	15612.1	P	P	0.000244	0.000244	14510.9	13570.2	14040.5	P	P	0.000244	0.000244	-0.1	0	-0.4	-0.1	-0.15	0.173205	NC	NC	NC	NC	4	-0.2	-0.1	NC	NC	18937	17784.1	18360.5	P	P
252661_at	AT3G44450	12	4	4	4	NC	NC	NC	NC	NC	NC	D	NC	NC	252661_at	505.6	379.1	442.35	P	P	0.008057	0.008057	597.6	528.8	563.2	P	P	0.00293	0.001221	0	0.4	-0.1	0.3	0.15	0.238048	NC	NC	NC	NC	4	-0.5	-0.2	NC	NC	605.4	499.6	552.5	P	P
252644_at	AT3G44600	12	4	4	4		NC	NC	I	NC	NC	NC	NC	NC	252644_at	743.7	835.1	789.4	P	P	0.008057	0.005859	866.8	817.6	842.2	P	P	0.00293	0.00415	0.5	0.3	0.3	0.1	0.3	0.163299	I	NC	NC	NC	1	0.2	-0.2	NC	NC	765.2	664.5	714.85	P	P
246335_at	AT3G44880	12	4	4	4	D	NC	NC		NC	NC		NC	NC	246335_at	3147.3	3112.2	3129.75	P	P	0.000244	0.000244	2294.5	2278.7	2286.6	P	P	0.000244	0.000244	-0.5	-0.5	-0.3	-0.4	-0.425	0.0957427	D	D	D	D	4	0	0.1	NC	NC	2231	2844.8	2537.9	P	P
246339_at	AT3G44890	12	4	4	4		NC	NC	I		NC	D	NC	NC	246339_at	9075.5	9506.1	9290.8	P	P	0.000244	0.000244	10718.7	9836	10277.4	P	P	0.000244	0.000244	0.3	0.2	0.1	0	0.15	0.129099	I	NC	NC	NC	1	0.1	-0.1	NC	NC	9389	9442.2	9415.6	P	P
252607_at	AT3G44990	12	4	4	4			NC	D	NC	NC			NC	252607_at	3428	3537.1	3482.55	P	P	0.000244	0.000244	2875.2	3819.9	3347.55	P	P	0.000732	0.000244	-0.4	-0.3	-0.1	0.1	-0.175	0.221736	D	D	NC	NC	2	-0.1	0.3	NC	I	3620.9	3349.9	3485.4	P	P
252618_at	AT3G45140	12	4	4	4	D	NC	NC			NC	I			252618_at	23319.1	21176	22247.5	P	P	0.000244	0.000244	14900.4	15269.1	15084.8	P	P	0.000244	0.000244	-0.6	-0.5	-0.6	-0.5	-0.55	0.057735	D	D	D	D	4	-0.2	0	NC	NC	18943.3	19724.8	19334	P	P
252616_at	AT3G45240	12	4	4	4	NC	NC	NC	I	NC	NC	NC	NC	NC	252616_at	715.7	860.5	788.1	P	P	0.000244	0.000732	968.5	741.4	854.95	P	P	0.001953	0.000244	0.3	0.1	0.3	-0.1	0.15	0.191485	NC	NC	NC	NC	4	0.3	-0.3	NC	NC	870.3	651.6	760.95	P	P
252622_at	AT3G45310	12	4	4	4			NC	D	NC	NC	I	NC	NC	252622_at	4732.5	4174.3	4453.4	P	P	0.000732	0.000732	3512.7	4175.7	3844.2	P	P	0.001221	0.001221	-0.3	-0.2	-0.1	0	-0.15	0.129099	D	D	NC	NC	2	-0.1	0.2	NC	I	4662.9	3846.1	4254.5	P	P
252576_s_at	AT3G45450	12	4	4	4	NC	NC		I	NC	NC	NC	NC	NC	252576_s_at	330.9	437.4	384.15	P	P	0.030273	0.001953	405.9	299.5	352.7	P	P	0.030273	0.00415	0.3	0	0.3	-0.3	0.075	0.287228	NC	NC	NC	NC	4	0.3	0	I	NC	407	300.7	353.85	P	P
252543_at	AT3G45780	12	4	4	4	I	NC	NC	I	NC	NC		NC	NC	252543_at	1804.8	1976.7	1890.75	P	P	0.000244	0.000244	2775.3	2449.6	2612.45	P	P	0.000244	0.000244	0.6	0.5	0.4	0.3	0.45	0.129099	I	I	I	I	4	0.1	-0.2	NC	NC	1914.6	1783.7	1849.15	P	P
252548_at	AT3G45850	12	4	4	4		NC	NC	I	NC	NC	NC	NC	NC	252548_at	621.9	573.4	597.65	P	P	0.00415	0.001953	736.3	761.4	748.85	P	P	0.001221	0.001221	0.5	0.3	0.4	0.2	0.35	0.129099	I	I	NC	NC	2	0.2	-0.1	NC	NC	512.8	558.4	535.6	P	P
252562_s_at	AT3G45930	12	4	4	4	I	NC	NC		NC		NC	NC	NC	252562_s_at	874.6	837.7	856.15	P	P	0.000244	0.000244	1118.2	1544.2	1331.2	P	P	0.000244	0.000244	0.5	0.3	0.8	0.8	0.6	0.244949	I	I	I	I	4	0.1	0.4	NC	NC	1366.6	901.3	1133.95	P	P
252534_at	AT3G46130	8	3	3	2		NC	NC	I	NC	NC	NC	NC	NC	252534_at	155.8	205.4	180.6	A	P	0.095215	0.037598	302.2	201.8	252	P	P	0.005859	0.010742	0.8	0.4	0.8	0.2	0.55	0.3	I	I	NC	NC	2	0.4	-0.1	NC	NC	155.4	117.1	136.25	A	P
252511_at	AT3G46280	12	4	4	4			NC	D			I	NC	NC	252511_at	1018.4	1083.2	1050.8	P	P	0.000244	0.000244	666	1091.5	878.75	P	P	0.000244	0.000244	-0.6	-0.8	0	-0.1	-0.375	0.386221	D	D	NC	NC	2	0.1	0.7	NC	I	1406.6	1893	1649.8	P	P
252473_s_at	AT3G46610	12	4	4	4	NC	NC	NC	I	NC	NC	NC	NC	NC	252473_s_at	445.3	514.7	480	P	P	0.000244	0.000244	568.2	528.2	548.2	P	P	0.000244	0.000244	0.3	0.1	0.2	0	0.15	0.129099	NC	NC	NC	NC	4	0.1	-0.1	NC	NC	504.5	421.2	462.85	P	P
252474_at	AT3G46620	12	4	4	4	D		NC	D	NC	NC	NC	NC	NC	252474_at	1769.8	1746.8	1758.3	P	P	0.000244	0.000244	974	1302.6	1138.3	P	P	0.00293	0.000732	-0.7	-0.8	-0.5	-0.5	-0.625	0.15	D	D	D	D	4	-0.1	0.4	NC	I	1835.4	1832.4	1833.9	P	P
252441_at	AT3G46780	12	4	4	4		NC	NC	I	NC	NC	D	NC	NC	252441_at	5855.3	6182.8	6019.05	P	P	0.000244	0.000244	7999.7	6799.9	7399.8	P	P	0.000244	0.000244	0.5	0.3	0.3	0.1	0.3	0.163299	I	I	I	NC	3	0.1	-0.2	NC	NC	6121.4	6158.9	6140.15	P	P
252412_at	AT3G47295	12	4	4	4		NC	NC		NC	NC	D	NC	NC	252412_at	1083.9	1050.2	1067.05	P	P	0.000244	0.000244	1257.1	1185.5	1221.3	P	P	0.000244	0.000244	0.3	0.4	-0.1	0.2	0.2	0.216025	NC	I	NC	NC	3	-0.3	-0.3	NC	NC	1389.8	1289.8	1339.8	P	P
252410_at	AT3G47450	12	4	4	4		NC	NC	I	NC	NC	NC	NC	NC	252410_at	546.4	691.1	618.75	P	P	0.000244	0.001953	951.6	782.4	867	P	P	0.000732	0.000244	0.3	0.4	0.3	0.2	0.3	0.0816497	NC	NC	I	NC	3	0.2	0	NC	NC	678.3	613.6	645.95	P	P
252417_at	AT3G47480	12	4	4	4		NC	NC	D	NC	NC	I		NC	252417_at	571.2	476.9	524.05	P	P	0.000244	0.000732	227.8	374.9	301.35	P	P	0.00415	0.000244	-1.1	-0.8	-0.6	-0.4	-0.725	0.298608	D	D	NC	NC	2	-0.3	0.2	NC	NC	642.9	552.3	597.6	P	P
252429_at	AT3G47500	12	4	4	4			NC		NC	NC	D	NC	NC	252429_at	855.9	847.7	851.8	P	P	0.001953	0.005859	946.5	672	809.25	P	P	0.00293	0.00293	0.4	0.5	-0.2	-0.1	0.15	0.351188	MI	I	NC	NC	1	0	-0.5	NC	D	683.9	889.3	786.6	P	P
252389_at	AT3G47833	12	4	4	4			NC	D	NC	NC	NC	NC	NC	252389_at	6973.7	6260.1	6616.9	P	P	0.000244	0.000244	4843.9	5474.3	5159.1	P	P	0.000244	0.000244	-0.6	-0.4	-0.3	-0.1	-0.35	0.208167	D	D	NC	NC	2	-0.1	0.3	NC	I	6960.6	6161.4	6561	P	P
252377_at	AT3G47950;AT3G47960	12	4	4	4	NC	NC	NC	NC	NC	NC	I	NC	NC	252377_at	1498.5	1497.8	1498.15	P	P	0.001953	0.000732	1561.6	1357.7	1459.65	P	P	0.000732	0.000732	0.1	-0.1	0.1	-0.2	-0.025	0.15	NC	NC	NC	NC	4	0.2	0	NC	NC	1483.5	1596.8	1540.15	P	P
252404_at	AT3G48110	12	4	4	4		NC	NC	I	NC	NC	NC	NC	NC	252404_at	900.6	1144.1	1022.35	P	P	0.000244	0.000244	1308.2	975.5	1141.85	P	P	0.000244	0.000244	0.5	0.3	0.1	0.1	0.25	0.191485	I	I	NC	NC	2	0.1	-0.3	NC	NC	781.2	1105.1	943.15	P	P
252353_at	AT3G48200	12	4	4	4	NC	NC	NC	I	NC	NC	NC	NC	NC	252353_at	1455.7	1703.2	1579.45	P	P	0.000244	0.000244	1732.5	1655.1	1693.8	P	P	0.000244	0.000244	0.2	0.1	0.1	-0.1	0.075	0.125831	NC	NC	NC	NC	4	0.2	-0.1	NC	NC	1644.3	1855.6	1749.95	P	P
252366_at	AT3G48420	12	4	4	4		NC	NC	I	NC	NC	NC	NC	NC	252366_at	4736	5492.8	5114.4	P	P	0.001221	0.001221	6696.9	6227.4	6462.15	P	P	0.001221	0.000732	0.4	0.3	0.3	0.2	0.3	0.0816497	I	I	I	NC	3	0.2	-0.1	NC	NC	5653	4921.6	5287.3	P	P
252362_at	AT3G48500	12	4	4	4	NC	NC	NC	I	NC	NC	NC	NC	NC	252362_at	1229.3	1260.5	1244.9	P	P	0.000732	0.000732	1484.8	1323.7	1404.25	P	P	0.000732	0.000732	0.3	0.2	0.2	0	0.175	0.125831	NC	NC	NC	NC	4	0.2	-0.1	NC	NC	1163.7	1347.3	1255.5	P	P
252328_at	AT3G48570	12	4	4	4		NC	NC	D	NC	NC	NC	NC	NC	252328_at	3884.3	3802.2	3843.25	P	P	0.000244	0.000244	3031.9	3157.5	3094.7	P	P	0.000244	0.000244	-0.3	-0.3	-0.4	-0.2	-0.3	0.0816497	D	D	D	NC	3	-0.1	0.1	NC	NC	3867.6	3756.3	3811.95	P	P
252315_at	AT3G48690	12	4	4	4		NC	NC			NC	I	NC	NC	252315_at	4158.7	3108.4	3633.55	P	P	0.001953	0.00415	2649.1	3530	3089.55	P	P	0.00293	0.00293	-0.5	-0.3	-0.2	-0.1	-0.275	0.170783	D	D	NC	NC	2	-0.2	0.2	NC	NC	4292.9	5483.2	4888.05	P	P
252317_at	AT3G48720	12	4	4	4		NC	NC	NC	NC	NC	D	NC	NC	252317_at	600.8	485.9	543.35	P	P	0.000244	0.000244	718.6	684.3	701.45	P	P	0.000244	0.000244	0.2	0.4	0.2	0.4	0.3	0.11547	NC	I	NC	I	2	-0.1	0	NC	NC	551.6	674.6	613.1	P	P
252318_at	AT3G48730	12	4	4	4	NC	NC	NC	I	NC	NC		NC	NC	252318_at	5932.6	6050.1	5991.35	P	P	0.000244	0.000244	6456.8	6295.2	6376	P	P	0.000244	0.000244	0.2	0.1	0.1	0	0.1	0.0816497	NC	NC	NC	NC	4	0.1	-0.1	NC	NC	6479.1	5722.1	6100.6	P	P
252327_at	AT3G48740	12	4	4	4	D	NC	NC		NC	NC		NC	NC	252327_at	9827	11091.4	10459.2	P	P	0.000244	0.000244	9149.5	8902.8	9026.15	P	P	0.000244	0.000244	-0.3	-0.3	-0.4	-0.3	-0.325	0.05	D	D	D	D	4	0	-0.1	NC	NC	9483	10888.2	10185.6	P	P
252334_at	AT3G48850	5	0	3	2	NC		NC			NC	I	NC	NC	252334_at	415	298.6	356.8	A	A	0.149658	0.171387	424	304.8	364.4	A	A	0.080566	0.19458	0.3	0.4	-0.3	-0.4	-1.38778e-17	0.408248	NC	NC	NC	NC	4	-0.2	-0.6	NC	D	456.1	651.6	553.85	P	P
252293_at	AT3G48990	12	4	4	4		NC	NC	D	NC	NC		NC	NC	252293_at	27750.8	24357.9	26054.3	P	P	0.000244	0.000244	21147.9	22475.7	21811.8	P	P	0.000244	0.000244	-0.4	-0.3	-0.5	-0.3	-0.375	0.0957427	D	D	D	NC	3	-0.2	0	NC	NC	26963.7	27856.5	27410.1	P	P
252287_at	AT3G49080	12	4	4	4		NC	NC	I	NC	NC	NC	NC	NC	252287_at	1365	1440.8	1402.9	P	P	0.000244	0.000244	1695.8	1526.2	1611	P	P	0.000244	0.000244	0.3	0.3	0.3	0.2	0.275	0.05	I	NC	NC	NC	1	0.1	-0.1	NC	NC	1461.5	1405.1	1433.3	P	P
252290_at	AT3G49140	12	4	4	4		NC	NC	I	NC	NC	NC	NC	NC	252290_at	553.5	604.2	578.85	P	P	0.00415	0.00293	733.7	597.7	665.7	P	P	0.00293	0.000732	0.5	0.1	0.2	0	0.2	0.216025	I	NC	NC	NC	1	0.3	-0.3	NC	NC	556.2	384.3	470.25	P	P
252300_at	AT3G49160	12	4	4	4	D	NC	NC	NC	NC	NC		NC	NC	252300_at	529.3	471.5	500.4	P	P	0.000244	0.000244	252.5	271.9	262.2	P	P	0.00415	0.000732	-1	-0.9	-1.1	-1	-1	0.0816497	D	D	D	D	4	0	0	NC	NC	482.5	477.5	480	P	P
252305_at	AT3G49240	12	4	4	4		NC	NC	I	NC	NC	NC	NC	NC	252305_at	277.4	272	274.7	P	P	0.000732	0.008057	434.6	374.3	404.45	P	P	0.00415	0.000244	0.7	0.5	0.4	0.4	0.5	0.141421	NC	I	I	I	1	0.2	0	NC	NC	320.7	238.1	279.4	P	P
252280_at	AT3G49260	12	4	4	4	I	NC	NC		NC	NC		NC	NC	252280_at	670.5	668.4	669.45	P	P	0.000244	0.000732	1107.7	994.2	1050.95	P	P	0.000244	0.000244	0.7	0.5	0.5	0.3	0.5	0.163299	I	I	I	I	4	0	-0.2	NC	NC	657.9	786.3	722.1	P	P
252239_at	AT3G49990	12	4	4	4	NC	NC	NC	I	NC	NC	NC	NC	NC	252239_at	929.6	971.7	950.65	P	P	0.001221	0.001221	1074.8	1199.9	1137.35	P	P	0.001221	0.001221	0.3	0	0.3	0.2	0.2	0.141421	NC	NC	NC	NC	4	0.1	0	NC	NC	1023.4	930	976.7	P	P
252193_at	AT3G50060	12	4	4	4	D	NC	NC	D	NC	NC		NC	NC	252193_at	1213.6	1173.7	1193.65	P	P	0.000244	0.000732	881.2	762.6	821.9	P	P	0.00415	0.000244	-0.4	-0.5	-1	-0.8	-0.675	0.275379	D	D	D	D	4	-0.2	-0.2	NC	NC	1059.6	1305.8	1182.7	P	P
252215_at	AT3G50240	9	2	3	4	I	NC	NC	I	NC	NC	NC	NC	NC	252215_at	180.6	185.2	182.9	A	M	0.129639	0.056152	339.8	294.2	317	P	P	0.00415	0.008057	1.1	1.2	0.9	0.6	0.95	0.264575	I	I	I	I	4	0.1	-0.2	NC	NC	162.5	198	180.25	P	A
252208_at	AT3G50380	12	4	4	4		NC	NC	I	NC	NC	NC	NC	NC	252208_at	477	510.6	493.8	P	P	0.001221	0.000732	792.2	618.3	705.25	P	P	0.000732	0.000732	0.5	0.5	0.4	0.2	0.4	0.141421	I	I	NC	NC	2	0.2	-0.2	NC	NC	449.6	496.2	472.9	P	P
252158_at	AT3G50530	12	4	4	4		NC	NC	I	NC	NC	NC	NC	NC	252158_at	1908.1	1907.7	1907.9	P	P	0.000244	0.000244	2869.9	2135.2	2502.55	P	P	0.000244	0.000244	0.6	0.4	0.3	0.2	0.375	0.170783	I	I	I	NC	3	0.2	-0.3	NC	NC	1651.8	1642	1646.9	P	P
252136_at	AT3G50770	11	4	4	3		NC	NC	D	NC	NC		NC		252136_at	585.5	612.4	598.95	P	P	0.001953	0.001221	457.3	421.4	439.35	P	P	0.00415	0.00293	-0.5	-0.4	-0.4	-0.6	-0.475	0.0957427	D	D	NC	D	3	0.1	-0.1	NC	NC	593.5	526.2	559.85	P	P
252132_at	AT3G50790	12	4	4	4	NC	NC	NC	NC	NC	NC	D	NC	NC	252132_at	1241.7	1332.5	1287.1	P	P	0.018555	0.023926	1541.8	1542.3	1542.05	P	P	0.01416	0.01416	0.3	0.2	0.1	0	0.15	0.129099	NC	NC	NC	NC	4	0.1	-0.2	NC	NC	1338.5	1448.3	1393.4	P	P
252130_at	AT3G50820	12	4	4	4	NC	NC	NC	NC		NC	D	NC	NC	252130_at	27592.9	25410.8	26501.8	P	P	0.000244	0.000244	25287.5	24307.4	24797.5	P	P	0.000244	0.000244	-0.1	0	-0.1	-0.1	-0.075	0.05	NC	NC	NC	NC	4	-0.1	-0.1	NC	NC	26956.2	24996.4	25976.3	P	P
252126_at	AT3G50960;AT3G50950	12	4	4	4	NC	NC	NC	NC	NC	NC	I	NC	NC	252126_at	2483	2392.3	2437.65	P	P	0.000244	0.000732	2313.1	2396.2	2354.65	P	P	0.000732	0.000732	0	0.2	0.1	0.2	0.125	0.0957427	NC	NC	NC	NC	4	-0.1	0	NC	NC	2235.8	2449.4	2342.6	P	P
252095_at	AT3G51000	12	4	4	4	NC	NC	NC		NC	NC	I	NC	NC	252095_at	1260.6	1260.4	1260.5	P	P	0.000244	0.000244	1157.4	1188.6	1173	P	P	0.000244	0.000244	-0.1	0	-0.1	-0.1	-0.075	0.05	NC	NC	NC	NC	4	-0.1	0	NC	NC	1393.9	1461.5	1427.7	P	P
252123_at	AT3G51240	12	4	4	4	NC	NC	NC			NC	D	NC	NC	252123_at	1934.8	1984.5	1959.65	P	P	0.000244	0.000244	2334.1	2445.1	2389.6	P	P	0.000244	0.000244	0.3	0.2	0.3	0.2	0.25	0.057735	NC	NC	NC	NC	4	0	0	NC	NC	2260	2504.9	2382.45	P	P
252147_at	AT3G51270	12	4	4	4	NC	NC	NC	I	NC	NC	NC	NC	NC	252147_at	307.3	314.6	310.95	P	P	0.000732	0.000732	438.4	315	376.7	P	P	0.005859	0.000732	0.4	0.2	0.1	-0.1	0.15	0.208167	NC	NC	NC	NC	4	0.3	-0.4	NC	NC	354.5	395.6	375.05	P	P
252068_at	AT3G51440	12	4	4	4		NC	NC	D	NC	NC	I		NC	252068_at	667	558.6	612.8	P	P	0.000244	0.000732	328.4	431.5	379.95	P	P	0.001221	0.000732	-0.9	-0.6	-0.6	-0.2	-0.575	0.287228	D	D	D	NC	3	-0.3	0.3	NC	NC	668.4	651.3	659.85	P	P
252077_at	AT3G51720	12	4	4	4		NC			NC		D	NC	NC	252077_at	376.6	373.5	375.05	P	P	0.010742	0.005859	586.4	467.8	527.1	P	P	0.008057	0.005859	0.7	0.3	0.4	-0.1	0.325	0.330404	I	NC	NC	NC	1	0.6	-0.3	I	NC	485.8	354	419.9	P	P
246302_at	AT3G51860	12	4	4	4	D	NC	NC	D			I	NC	NC	246302_at	4001.7	3633.5	3817.6	P	P	0.000244	0.000244	1959.2	2642.5	2300.85	P	P	0.000244	0.000244	-0.9	-0.9	-0.7	-0.6	-0.775	0.15	D	D	D	D	4	0	0.3	NC	NC	3700.3	4540.2	4120.25	P	P
252033_at	AT3G51950	12	4	4	4	I	NC	NC	I	NC	NC	NC	NC	NC	252033_at	2434.2	2660.1	2547.15	P	P	0.000244	0.000244	4050.4	3002.7	3526.55	P	P	0.000732	0.000244	0.7	0.6	0.4	0.2	0.475	0.221736	I	I	I	I	4	0.1	-0.2	NC	NC	2137.6	2116.8	2127.2	P	P
252032_at	AT3G52150	12	4	4	4	NC	NC	NC	I	NC	NC	D	NC	NC	252032_at	8734	8628.5	8681.25	P	P	0.000244	0.000244	9730.7	10337.7	10034.2	P	P	0.000244	0.000732	0.2	0.2	0.2	0.2	0.2	0	NC	NC	NC	NC	4	0	0	NC	NC	9062.1	10045.1	9553.6	P	P
256675_at	AT3G52170	12	4	4	4	I	NC	NC	I	NC	NC	NC	NC	NC	256675_at	235.5	252.7	244.1	P	P	0.008057	0.001953	521	497.8	509.4	P	P	0.00415	0.000732	1	0.8	0.9	0.6	0.825	0.170783	I	I	I	I	4	0.4	-0.2	NC	NC	260.4	339.9	300.15	P	P
256676_at	AT3G52180	12	4	4	4					NC	NC	I	NC	NC	256676_at	2341.7	3166.8	2754.25	P	P	0.000244	0.000244	1915.5	2905.7	2410.6	P	P	0.000244	0.000244	-0.3	-0.6	0.3	0	-0.15	0.387298	D	D	I	NC	2	0.2	0.6	I	I	2739.7	2945.5	2842.6	P	P
256681_at	AT3G52340	12	4	4	4	D	NC	NC	NC	NC	NC	NC	NC	NC	256681_at	1759.9	1911.6	1835.75	P	P	0.000244	0.000244	1244.7	1292.5	1268.6	P	P	0.000244	0.000244	-0.3	-0.5	-0.5	-0.6	-0.475	0.125831	D	D	D	D	4	0.1	-0.1	NC	NC	1535	1737.6	1636.3	P	P
252058_at	AT3G52470	12	4	4	4		NC	NC	D	NC	NC		NC	NC	252058_at	4627.3	3736.6	4181.95	P	P	0.000244	0.000244	3168.3	4184.6	3676.45	P	P	0.000244	0.000244	-0.3	-0.2	-0.2	0.1	-0.15	0.173205	D	NC	NC	NC	1	-0.2	0.2	NC	NC	4612.4	4339.6	4476	P	P
252029_s_at	AT3G52660	12	4	4	4	NC	NC	NC	I	NC	NC	NC	NC	NC	252029_s_at	338.3	435.2	386.75	P	P	0.005859	0.00293	375.6	508.2	441.9	P	P	0.001953	0.005859	0.2	-0.1	0.3	0.2	0.15	0.173205	NC	NC	NC	NC	4	0.4	0.2	NC	NC	413.2	249.1	331.15	P	P
252011_at	AT3G52720	12	4	4	4	NC	NC	NC				D	NC	NC	252011_at	1306.7	1558.5	1432.6	P	P	0.000244	0.000244	1889.3	2076.5	1982.9	P	P	0.000244	0.000732	0.2	0.2	0.4	0.1	0.225	0.125831	NC	NC	NC	NC	4	0.2	0	NC	NC	1660.6	1380.2	1520.4	P	P
251996_at	AT3G52840	12	4	4	4		NC	NC	I	NC	NC	D	NC	NC	251996_at	1351.1	1503.8	1427.45	P	P	0.000244	0.000244	1926.6	1608.4	1767.5	P	P	0.000244	0.000244	0.4	0.3	0.2	0.3	0.3	0.0816497	I	MI	NC	NC	1	0.1	-0.1	NC	NC	1449.9	1605.8	1527.85	P	P
252022_at	AT3G52930	12	4	4	4	NC	NC	NC	D	NC	NC		NC	NC	252022_at	25285.3	20945.1	23115.2	P	P	0.01416	0.023926	17921.9	24449.7	21185.8	P	P	0.01416	0.010742	-0.3	-0.2	0	-0.1	-0.15	0.129099	NC	NC	NC	NC	4	-0.1	0.2	NC	NC	24065.6	27835.6	25950.6	P	P
252016_at	AT3G52950	12	4	4	4		NC	NC	I	NC	NC	NC	NC	NC	252016_at	990.1	853.4	921.75	P	P	0.030273	0.023926	891.3	1120	1005.65	P	P	0.018555	0.008057	0.4	0.1	0.4	0.2	0.275	0.15	I	NC	NC	NC	1	0.2	0	NC	NC	974.1	778.8	876.45	P	P
251982_at	AT3G53190	12	4	4	4	I	NC		I	NC	NC		NC	NC	251982_at	1138.2	1420.2	1279.2	P	P	0.000244	0.000244	2146.1	1945.8	2045.95	P	P	0.000244	0.000244	0.8	0.5	0.8	0.5	0.65	0.173205	I	I	I	I	4	0.4	0.1	I	NC	1245.3	1380.2	1312.75	P	P
251975_at	AT3G53230	11	3	4	4	NC	NC	NC		NC	NC	I	NC	NC	251975_at	930.6	880.3	905.45	P	P	0.01416	0.005859	724.2	818.5	771.35	A	P	0.129639	0.010742	-0.2	-0.1	0	0	-0.075	0.0957427	NC	NC	NC	NC	4	0	0.2	NC	NC	615.2	710.2	662.7	P	P
251942_at	AT3G53480	12	4	4	4	I	NC	NC		NC	NC	NC	NC	NC	251942_at	1269.2	1434.5	1351.85	P	P	0.000244	0.000244	1786.7	2153.1	1969.9	P	P	0.000244	0.000244	0.5	0.5	0.6	0.7	0.575	0.0957427	I	I	I	I	4	0	0.1	NC	NC	1225	1291.6	1258.3	P	P
251906_at	AT3G53720	12	4	4	4	NC	NC	NC	NC	NC	NC	I	NC	NC	251906_at	592	473.2	532.6	P	P	0.000732	0.000244	489.9	498.3	494.1	P	P	0.000244	0.000244	-0.1	0.2	0	0.1	0.05	0.129099	NC	NC	NC	NC	4	-0.2	0.2	NC	NC	648.9	510.4	579.65	P	P
251930_at	AT3G53780	12	4	4	4	NC	NC	NC			NC	I	NC	NC	251930_at	1065.7	1111	1088.35	P	P	0.000732	0.000244	1298.7	1154.1	1226.4	P	P	0.001221	0.000732	0	-0.2	0.2	-0.1	-0.025	0.170783	NC	NC	NC	NC	4	0.2	0.1	NC	NC	1157.6	1156.6	1157.1	P	P
251920_at	AT3G53900	12	4	4	4		NC	NC		NC	NC	D	NC	NC	251920_at	1366	1594.1	1480.05	P	P	0.000244	0.000244	1683.1	1666.4	1674.75	P	P	0.000244	0.000244	0.3	0.2	0.2	0.2	0.225	0.05	I	NC	I	NC	2	0.1	0	NC	NC	1492.3	1606.1	1549.2	P	P
251929_at	AT3G53920	12	4	4	4		NC	NC	I	NC	NC	NC	NC	NC	251929_at	700.8	771.2	736	P	P	0.000244	0.000244	970	894	932	P	P	0.000244	0.000244	0.4	0.2	0.3	0.2	0.275	0.0957427	I	NC	I	NC	2	0.1	-0.1	NC	NC	821.2	806.4	813.8	P	P
251928_at	AT3G53980	12	4	4	4		NC				NC	I	NC	NC	251928_at	2256.6	2865.6	2561.1	P	P	0.000244	0.000244	2346.5	2730.3	2538.4	P	P	0.000244	0.000244	0	-0.3	0.2	0	-0.025	0.206155	NC	D	NC	NC	3	0.4	0.1	I	NC	2678.1	2322.1	2500.1	P	P
251885_at	AT3G54050	12	4	4	4		NC	NC		NC	NC	D	NC	NC	251885_at	8892.8	9549.6	9221.2	P	P	0.000244	0.000244	10740.6	10100.7	10420.6	P	P	0.000244	0.000244	0.4	0.2	0.3	0	0.225	0.170783	I	NC	NC	NC	1	0.2	-0.1	NC	NC	9127.5	9285.6	9206.55	P	P
251883_at	AT3G54210	12	4	4	4	NC	NC	NC		NC	NC	D	NC	NC	251883_at	15238.2	14244.3	14741.2	P	P	0.000244	0.000244	14369.3	14562.7	14466	P	P	0.000244	0.000244	-0.1	0	-0.1	0	-0.05	0.057735	NC	NC	NC	NC	4	-0.1	0	NC	NC	15242.1	15416	15329	P	P
251876_at	AT3G54280	12	4	4	4	NC	NC	NC	I	NC	NC	NC	NC	NC	251876_at	552.9	608.5	580.7	P	P	0.000244	0.001221	766.9	631.7	699.3	P	P	0.000732	0.000244	0.6	0.4	0.3	0.1	0.35	0.208167	NC	NC	NC	NC	4	0	-0.2	NC	NC	587.3	565.7	576.5	P	P
251866_at	AT3G54350	12	4	4	4		NC	NC	I	NC	NC	NC	NC	NC	251866_at	487.7	493	490.35	P	P	0.001953	0.000732	727.6	724.9	726.25	P	P	0.000732	0.000244	0.7	0.4	0.6	0.4	0.525	0.15	I	I	I	NC	3	0.3	0	NC	NC	438.9	465.5	452.2	P	P
251869_at	AT3G54500	12	4	4	4			NC	I	NC	NC	D		NC	251869_at	543.4	585.8	564.6	P	P	0.000244	0.000244	1345.1	618.9	982	P	P	0.000244	0.000244	1.3	1.1	0	-0.1	0.575	0.727438	I	I	NC	NC	2	0.1	-1.3	NC	D	506	525.8	515.9	P	P
251847_at	AT3G54640	12	4	4	4	D	NC	NC	D	NC	NC		NC		251847_at	5978.1	5879.9	5929	P	P	0.000244	0.000244	4174.1	4251.1	4212.6	P	P	0.000244	0.000244	-0.5	-0.5	-0.4	-0.4	-0.45	0.057735	D	D	D	D	4	0	0.2	NC	NC	5670.8	6720.4	6195.6	P	P
251814_at	AT3G54890	12	4	4	4	NC	NC	NC		NC	NC	D	NC	NC	251814_at	40396.4	38410.8	39403.6	P	P	0.000244	0.000244	44361.6	37305.5	40833.6	P	P	0.000244	0.000244	0.1	0.2	-0.1	-0.1	0.025	0.15	NC	NC	NC	NC	4	-0.1	-0.2	NC	NC	37389.5	40161.4	38775.4	P	P
251807_at	AT3G55400	12	4	4	4		NC	NC	I		NC	D	NC	NC	251807_at	1325.6	1603.8	1464.7	P	P	0.000244	0.000244	1917.2	1416.8	1667	P	P	0.000244	0.000244	0.6	0.2	0.2	-0.1	0.225	0.287228	I	NC	NC	NC	1	0.3	-0.3	NC	NC	1305.2	1293	1299.1	P	P
251808_at	AT3G55480	12	4	4	4	NC	NC	NC	I	NC	NC	NC	NC	NC	251808_at	1018.9	773.2	896.05	P	P	0.000732	0.000732	1039.7	822.2	930.95	P	P	0.001221	0.000732	0.2	0.2	0	-0.2	0.05	0.191485	NC	NC	NC	NC	4	0.1	-0.2	NC	NC	811.1	761	786.05	P	P
251800_at	AT3G55510	12	4	4	4		NC	NC	I	NC	NC		NC	NC	251800_at	454.2	658.8	556.5	P	P	0.008057	0.001221	721.3	729.9	725.6	P	P	0.000244	0.000244	0.7	0.4	0.4	0.3	0.45	0.173205	I	I	I	NC	3	0.2	-0.3	NC	NC	755.7	605.6	680.65	P	P
251759_at	AT3G55630	12	4	4	4		NC		I	NC	NC		NC	NC	251759_at	1049.9	1586.3	1318.1	P	P	0.000244	0.000244	1961.6	1682.5	1822.05	P	P	0.000244	0.000244	0.9	0.3	0.6	0	0.45	0.387298	I	NC	I	NC	2	0.6	-0.3	I	NC	1256.7	1274.7	1265.7	P	P
251745_at	AT3G55980	12	4	4	4	D	NC	NC	D	NC	NC	NC	NC	NC	251745_at	858.1	764.5	811.3	P	P	0.001953	0.001221	453.8	414.5	434.15	P	P	0.001953	0.00293	-1	-0.8	-0.9	-0.7	-0.85	0.129099	D	D	D	D	4	-0.2	0	NC	NC	995.9	976.5	986.2	P	P
251741_at	AT3G56040	12	4	4	4		NC	NC	I	NC	NC	NC	NC	NC	251741_at	1015.5	1066.5	1041	P	P	0.000732	0.001953	1261.7	951.8	1106.75	P	P	0.001221	0.000244	0.3	0.3	0.1	0	0.175	0.15	I	NC	NC	NC	1	0.1	-0.2	NC	NC	686.8	791	738.9	P	P
251735_at	AT3G56090	12	4	4	4			NC			NC	D	NC	NC	251735_at	5125.9	4836.3	4981.1	P	P	0.000244	0.000244	3301	4024	3662.5	P	P	0.000244	0.000244	-0.7	-0.6	-0.4	-0.3	-0.5	0.182574	D	D	D	NC	3	-0.1	0.4	NC	I	4288.8	5661	4974.9	P	P
251722_at	AT3G56200	12	4	4	4	NC	NC	NC	D		NC	I	NC	NC	251722_at	2186.2	2140.8	2163.5	P	P	0.001221	0.000244	1822.1	1719.8	1770.95	P	P	0.001221	0.000732	-0.2	-0.2	-0.4	-0.3	-0.275	0.0957427	NC	NC	NC	NC	4	-0.1	-0.1	NC	NC	2166.6	2637.8	2402.2	P	P
251704_at	AT3G56360	12	4	4	4	I	NC	NC	NC	NC	NC	NC		NC	251704_at	3387.4	4111.9	3749.65	P	P	0.00415	0.00293	6299.4	5423	5861.2	P	P	0.001221	0.001221	0.7	0.5	0.5	0.3	0.5	0.163299	I	I	I	I	4	0.2	-0.2	NC	NC	5096.7	4482.1	4789.4	P	P
251714_at	AT3G56370	12	4	4	4	I	NC	NC	I	NC	NC		NC	NC	251714_at	931.3	1132.9	1032.1	P	P	0.000244	0.000244	1945.6	1556.9	1751.25	P	P	0.000244	0.000244	0.7	0.8	0.5	0.6	0.65	0.129099	I	I	I	I	4	-0.1	-0.2	NC	NC	1142.7	1042.5	1092.6	P	P
251705_at	AT3G56400	12	4	4	4		NC		D	NC	NC	I	NC		251705_at	1628.6	1318.6	1473.6	P	P	0.000244	0.000244	1443.4	1378.9	1411.15	P	P	0.000244	0.000244	-0.2	0.2	-0.3	0	-0.075	0.221736	D	NC	NC	NC	1	-0.4	0	D	NC	1522.3	1340.2	1431.25	P	P
251701_at	AT3G56650	12	4	4	4		NC	NC		NC	NC	D	NC	NC	251701_at	1288.8	1612.8	1450.8	P	P	0.000244	0.000244	1742.7	1521.2	1631.95	P	P	0.000732	0.000244	0.6	0.2	0.2	0	0.25	0.251661	I	NC	NC	NC	1	0.5	-0.2	NC	NC	1713.2	1469.2	1591.2	P	P
246319_at	AT3G56680	12	4	4	4		NC	NC	I	NC	NC	NC	NC	NC	246319_at	2755.1	2903.6	2829.35	P	P	0.000244	0.000244	3299.8	3354.5	3327.15	P	P	0.000244	0.000244	0.3	0.1	0.3	0.2	0.225	0.0957427	NC	NC	MI	NC	3	0.1	0.1	NC	NC	3256.4	3210.9	3233.65	P	P
246293_at	AT3G56710	12	4	4	4		NC	NC	D	NC	NC			NC	246293_at	897.9	793.4	845.65	P	P	0.000244	0.000244	1007.3	985.5	996.4	P	P	0.000244	0.000244	0.1	0.4	0	0.3	0.2	0.182574	NC	I	NC	NC	3	-0.3	-0.1	NC	NC	913	901.5	907.25	P	P
246289_at	AT3G56880	12	4	4	4	D	NC	NC			NC	NC	NC	NC	246289_at	3478.9	3312.3	3395.6	P	P	0.000244	0.000244	2020	2262.1	2141.05	P	P	0.000244	0.000244	-0.7	-0.6	-0.6	-0.5	-0.6	0.0816497	D	D	D	D	4	-0.1	0.2	NC	NC	3318.5	3351.9	3335.2	P	P
246294_at	AT3G56910	12	4	4	4	NC	NC	NC	NC		NC	D	NC	NC	246294_at	16193.8	14355	15274.4	P	P	0.000244	0.000244	14962.2	14591.6	14776.9	P	P	0.000244	0.000244	-0.1	0	-0.1	0	-0.05	0.057735	NC	NC	NC	NC	4	-0.1	0	NC	NC	15889.7	16301.3	16095.5	P	P
251664_at	AT3G56940	12	4	4	4		NC	NC		NC	NC	D	NC	NC	251664_at	19898.8	18893.4	19396.1	P	P	0.000244	0.000244	22911.3	20167.6	21539.5	P	P	0.000244	0.000244	0.2	0.3	0	0	0.125	0.15	NC	I	NC	NC	3	0	-0.2	NC	NC	19750.4	18781.5	19266	P	P
251657_at	AT3G57000	12	4	4	4		NC		I	NC	NC	NC	NC	NC	251657_at	1191.3	1452.1	1321.7	P	P	0.000244	0.000244	1816.2	1636.4	1726.3	P	P	0.000244	0.000244	0.5	0.2	0.5	0.1	0.325	0.206155	I	NC	I	NC	2	0.3	-0.1	I	NC	1330.5	1439.2	1384.85	P	P
251667_at	AT3G57150	12	4	4	4		NC	NC			NC	D	NC	NC	251667_at	4609.2	4705.6	4657.4	P	P	0.000244	0.000244	5903	5515.5	5709.25	P	P	0.000244	0.000244	0.3	0.3	0.2	0.1	0.225	0.0957427	I	NC	NC	NC	1	0	-0.2	NC	NC	3805.1	5238.7	4521.9	P	P
251641_at	AT3G57470	9	1	4	4		NC	NC	I	NC	NC	NC	NC	NC	251641_at	435.3	410.7	423	A	A	0.171387	0.067627	540.8	468.2	504.5	A	P	0.129639	0.010742	0.5	0.5	0.4	0.3	0.425	0.0957427	I	NC	NC	NC	1	0.1	-0.1	NC	NC	465.6	466.1	465.85	P	P
251642_at	AT3G57520	12	4	4	4	D	NC	NC	NC	NC	NC	NC	NC	NC	251642_at	3656.8	3789.8	3723.3	P	P	0.000244	0.000244	2712.1	3028.1	2870.1	P	P	0.000244	0.000244	-0.6	-0.6	-0.5	-0.6	-0.575	0.05	D	D	D	D	4	0.1	0	NC	NC	3746.9	3105	3425.95	P	P
251647_at	AT3G57770	7	2	3	2	NC	NC	NC	NC	NC	NC	I	NC	NC	251647_at	225.5	205.8	215.65	A	M	0.080566	0.056152	219.1	187	203.05	P	P	0.037598	0.046143	0.3	0.1	0	0	0.1	0.141421	NC	NC	NC	NC	4	0	-0.2	NC	NC	221.6	202.8	212.2	A	P
251602_at	AT3G57785	12	4	4	4		NC		D	NC	NC	NC	NC	NC	251602_at	3576.9	2733.5	3155.2	P	P	0.000244	0.000244	2600.2	3037.8	2819	P	P	0.000244	0.000244	-0.6	-0.1	-0.3	0.1	-0.225	0.298608	D	NC	NC	NC	1	-0.4	0.2	D	NC	3250.2	3556.4	3403.3	P	P
251573_at	AT3G58140	12	4	4	4	NC	NC	NC	I	NC	NC		NC	NC	251573_at	2941.2	3327.9	3134.55	P	P	0.000244	0.000244	3600.5	3417.3	3508.9	P	P	0.000244	0.000244	0.2	0.1	0	0	0.075	0.0957427	NC	NC	NC	NC	4	0.1	0	NC	NC	2759.8	2810.5	2785.15	P	P
251536_at	AT3G58610	12	4	4	4	NC	NC	NC			NC	D	NC	NC	251536_at	24120.4	22133.7	23127	P	P	0.000244	0.000244	22243.6	21896.6	22070.1	P	P	0.000244	0.000244	-0.1	0	-0.1	-0.1	-0.075	0.05	NC	NC	NC	NC	4	0	-0.1	NC	NC	21142.3	24120.5	22631.4	P	P
251557_at	AT3G58730	12	4	4	4			NC	D	NC	NC	NC	NC	NC	251557_at	9006.5	8503.5	8755	P	P	0.000244	0.000244	6399.8	6899	6649.4	P	P	0.000244	0.000244	-0.6	-0.4	-0.4	-0.1	-0.375	0.206155	D	D	D	NC	3	-0.2	0.3	NC	I	8373.4	7878.1	8125.75	P	P
251496_at	AT3G59030;AT3G59040	12	4	4	4		NC	NC	I	NC	NC		NC	NC	251496_at	849.8	1049	949.4	P	P	0.000244	0.000244	1372	1303.5	1337.75	P	P	0.000244	0.000244	0.6	0.4	0.5	0.1	0.4	0.216025	I	I	I	NC	3	0.4	-0.1	NC	NC	1021.9	918.2	970.05	P	P
251497_at	AT3G59060	12	4	4	4	NC		NC	NC	NC	NC	D	NC	NC	251497_at	1355.7	1001.4	1178.55	P	P	0.000244	0.000244	1221.4	912.7	1067.05	P	P	0.000244	0.000244	0.1	0.2	-0.3	-0.2	-0.05	0.238048	NC	NC	NC	NC	4	-0.1	-0.4	NC	D	921.8	1317.8	1119.8	P	P
251519_at	AT3G59400	12	4	4	4		NC	NC		NC	NC	D	NC	NC	251519_at	3672	3665.8	3668.9	P	P	0.000732	0.000244	4488.2	4043.8	4266	P	P	0.000244	0.000244	0.3	0.3	0.1	0.1	0.2	0.11547	I	I	NC	NC	2	0	-0.2	NC	NC	4434.4	3693.6	4064	P	P
251438_s_at	AT3G59930;AT5G33355	6	3	3	0	D	NC	NC	D	NC	NC	NC	NC	NC	251438_s_at	719.1	573.5	646.3	P	P	0.005859	0.00415	152.1	206.2	179.15	A	P	0.067627	0.023926	-1.8	-1.7	-1.4	-1.3	-1.55	0.238048	D	D	D	D	4	-0.1	0.2	NC	NC	600.2	582.4	591.3	P	P
251443_at	AT3G59950;AT3G59940	12	4	4	4	D	NC	NC	D	NC	NC	D	NC	NC	251443_at	5324.8	4559	4941.9	P	P	0.000244	0.000244	2722.7	2313.8	2518.25	P	P	0.000244	0.000244	-0.9	-0.8	-1.2	-1	-0.975	0.170783	D	D	D	D	4	-0.1	-0.3	NC	NC	4558.6	4550.3	4554.45	P	P
251414_at	AT3G60370	12	4	4	4	NC	NC	NC	I	NC	NC	NC	NC	NC	251414_at	930.5	1277.7	1104.1	P	P	0.00293	0.00415	1166.6	1274	1220.3	P	P	0.001953	0.001221	0.3	0.1	0.2	0	0.15	0.129099	NC	NC	NC	NC	4	0.2	-0.2	NC	NC	1485.9	1298.9	1392.4	P	P
251336_at	AT3G61190	12	4	4	4	NC	NC			NC	NC	I	NC	NC	251336_at	263.4	170.9	217.15	P	P	0.001221	0.005859	185.7	204	194.85	P	P	0.00293	0.005371	-0.2	0.1	-0.3	0.3	-0.025	0.275379	NC	NC	NC	NC	4	-0.7	0.1	D	NC	235.7	203.4	219.55	P	P
251306_at	AT3G61260	12	4	4	4	I	NC	NC		NC	NC		NC	NC	251306_at	1836	1993.8	1914.9	P	P	0.001953	0.001221	2647.7	2460	2553.85	P	P	0.001221	0.000732	0.5	0.3	0.4	0.3	0.375	0.0957427	I	I	I	I	4	0.2	0	NC	NC	2082.6	1524.2	1803.4	P	P
251278_at	AT3G61780	11	3	4	4		NC	NC	I	NC	NC	NC	NC	NC	251278_at	228.7	368.1	298.4	A	P	0.067627	0.030273	551.2	492.6	521.9	P	P	0.037598	0.046143	1	0.5	0.7	0.1	0.575	0.377492	I	NC	NC	NC	1	0.5	-0.4	NC	NC	335.9	360	347.95	P	P
251242_at	AT3G61860	12	4	4	4		NC	NC	I	NC	NC		NC	NC	251242_at	1873.3	1997.4	1935.35	P	P	0.000244	0.000244	1822.8	2689.6	2256.2	P	P	0.000244	0.000244	0.3	0.1	0.3	0.2	0.225	0.0957427	I	NC	NC	NC	1	0.2	0	NC	NC	2679.5	2214.1	2446.8	P	P
251243_at	AT3G61870	12	4	4	4	NC	NC	NC	NC	NC	NC	D	NC	NC	251243_at	9951.7	9048	9499.85	P	P	0.000244	0.000244	9561.9	9002	9281.95	P	P	0.000244	0.000244	-0.1	0	-0.2	-0.1	-0.1	0.0816497	NC	NC	NC	NC	4	0	-0.1	NC	NC	9478.6	9934.7	9706.65	P	P
251296_at	AT3G62010	12	4	4	4		NC	NC	I	NC	NC	NC	NC	NC	251296_at	1401.3	1351.7	1376.5	P	P	0.000732	0.000732	1647.8	1401.8	1524.8	P	P	0.000732	0.000732	0.3	0.3	0	0	0.15	0.173205	NC	I	NC	NC	3	0	-0.3	NC	NC	1206.5	1435.5	1321	P	P
251261_at	AT3G62110	12	4	4	4		NC	NC	I	NC	NC	NC	NC	NC	251261_at	1114.3	1145.7	1130	P	P	0.000244	0.000244	1556.9	1643.1	1600	P	P	0.000244	0.000244	0.4	0.4	0.5	0.5	0.45	0.057735	I	MI	I	I	3	0.1	0.1	NC	NC	1310.8	996.6	1153.7	P	P
251254_at	AT3G62270	12	4	4	4	I	NC	NC	NC	NC	NC		NC	NC	251254_at	2044.5	2185.8	2115.15	P	P	0.000732	0.000732	2474.5	2983.7	2729.1	P	P	0.000244	0.000244	0.4	0.3	0.5	0.4	0.4	0.0816497	I	I	I	I	4	0.1	0	NC	NC	1842.8	1798.2	1820.5	P	P
251256_at	AT3G62300	12	4	4	4	NC	NC	NC	I	NC	NC	NC	NC	NC	251256_at	303.1	343.8	323.45	P	P	0.000244	0.001953	409.6	460.4	435	P	P	0.000244	0.000732	0.4	0	0.4	0.5	0.325	0.221736	NC	NC	NC	NC	4	-0.1	0.2	NC	NC	288.7	337.5	313.1	P	P
251265_at	AT3G62310	12	4	4	4	I	NC	NC		NC	NC	NC	NC	NC	251265_at	1136.3	1201.1	1168.7	P	P	0.000244	0.000244	1531.6	1494.5	1513.05	P	P	0.000244	0.000244	0.5	0.3	0.3	0.4	0.375	0.0957427	I	I	I	I	4	0.2	0	NC	NC	1142.4	1214.7	1178.55	P	P
251222_at	AT3G62580	12	4	4	4		NC	NC	D	NC	NC	NC	NC	NC	251222_at	4784.7	4840.8	4812.75	P	P	0.000244	0.000244	3571.5	3858.4	3714.95	P	P	0.000244	0.000244	-0.6	-0.4	-0.4	-0.2	-0.4	0.163299	D	D	D	NC	3	-0.2	0.2	NC	NC	4348.7	4498	4423.35	P	P
251182_at	AT3G62600	12	4	4	4		NC	NC		NC	NC	I	NC	NC	251182_at	3127.1	3298.7	3212.9	P	P	0.000244	0.000244	3670.8	3140.1	3405.45	P	P	0.000244	0.000244	0.3	0.1	0.2	0	0.15	0.129099	I	NC	NC	NC	1	0.2	-0.1	NC	NC	2728.2	3061.7	2894.95	P	P
251189_at	AT3G62650	12	4	4	4			NC	D	NC	NC	NC	NC	NC	251189_at	3726.2	4726.6	4226.4	P	P	0.000244	0.000732	3020.9	3502.5	3261.7	P	P	0.000732	0.000244	-0.5	-0.3	-0.2	-0.1	-0.275	0.170783	D	D	NC	NC	2	-0.2	0.2	NC	I	3992.6	4781.1	4386.85	P	P
251226_at	AT3G62680	12	4	4	4	D		NC	D	NC	NC		NC	NC	251226_at	1513.5	1490.7	1502.1	P	P	0.001953	0.001221	525.4	1088.1	806.75	P	P	0.018555	0.00293	-1.3	-1.3	-0.5	-0.5	-0.9	0.46188	D	D	D	D	4	0	0.8	NC	I	1203.5	1240.7	1222.1	P	P
251205_at	AT3G63080	12	4	4	4		NC	NC		NC	NC	I	NC	NC	251205_at	1978.9	2109.5	2044.2	P	P	0.000244	0.000244	1625.6	2015.9	1820.75	P	P	0.000244	0.000244	-0.3	-0.3	0	-0.1	-0.175	0.15	D	D	NC	NC	2	0	0.3	NC	NC	2293.3	2233.1	2263.2	P	P
251151_at	AT3G63170	12	4	4	4	NC	NC	NC	I	NC	NC	NC	NC	NC	251151_at	1554.5	1431.3	1492.9	P	P	0.000244	0.000244	1539.5	1580.6	1560.05	P	P	0.000732	0.000244	-0.1	0	0.1	0	0	0.0816497	NC	NC	NC	NC	4	0	0.1	NC	NC	1250.5	1411.9	1331.2	P	P
251172_at	AT3G63190	12	4	4	4		NC	NC	I	NC	NC		NC		251172_at	2631.5	2872.3	2751.9	P	P	0.000244	0.000244	3550.2	3365.4	3457.8	P	P	0.000244	0.000244	0.3	0.2	0.4	0.2	0.275	0.0957427	I	NC	I	NC	2	0.1	0	NC	NC	2615.9	2775.1	2695.5	P	P
251170_at	AT3G63260	12	4	4	4		NC	NC	D	NC	NC	NC	NC	NC	251170_at	3041.8	2632.4	2837.1	P	P	0.001221	0.00415	2387.2	2463	2425.1	P	P	0.001953	0.001221	-0.4	-0.1	-0.3	0	-0.2	0.182574	D	NC	NC	NC	1	-0.3	0.1	NC	NC	2830.6	2820.5	2825.55	P	P
251118_at	AT3G63410	12	4	4	4	NC	NC	NC	NC	NC	NC	D	NC	NC	251118_at	15635.4	14189.6	14912.5	P	P	0.000244	0.000244	13485.6	14253.9	13869.8	P	P	0.000244	0.000244	-0.1	0	-0.1	0	-0.05	0.057735	NC	NC	NC	NC	4	-0.1	0.1	NC	NC	14555.3	15202.8	14879	P	P
251119_at	AT3G63510	12	4	4	4	NC	NC	NC	I	NC	NC	NC	NC	NC	251119_at	575.3	590.6	582.95	P	P	0.00293	0.001953	604.7	493	548.85	P	P	0.030273	0.000244	0.4	-0.1	0.1	0.1	0.125	0.206155	NC	NC	NC	NC	4	0.2	-0.2	NC	NC	494.1	596.8	545.45	P	P
255706_at	AT4G00100	12	4	4	4	NC	NC	NC	NC	NC	NC	D	NC	NC	255706_at	17053.4	15575.3	16314.4	P	P	0.000244	0.000244	15883.1	15436.7	15659.9	P	P	0.000244	0.000244	-0.2	0	0	0.1	-0.025	0.125831	NC	NC	NC	NC	4	-0.1	0.1	NC	NC	15423.4	16950.4	16186.9	P	P
255668_s_at	AT4G00238	12	4	4	4		NC		I	NC	NC	NC	NC	NC	255668_s_at	402.3	714.1	558.2	P	P	0.000244	0.000244	784.7	827.3	806	P	P	0.000732	0.000732	0.8	0.2	0.6	-0.1	0.375	0.403113	I	NC	NC	NC	1	0.6	-0.1	I	NC	724.5	692.4	708.45	P	P
255691_at	AT4G00370	12	4	4	4	NC	NC	NC	I	NC	NC	NC	NC	NC	255691_at	3073.6	3404.2	3238.9	P	P	0.001221	0.000732	3160.7	3757.4	3459.05	P	P	0.000732	0.000732	0.2	-0.1	0.2	-0.1	0.05	0.173205	NC	NC	NC	NC	4	0.2	0	NC	NC	3177.7	2818.8	2998.25	P	P
255690_at	AT4G00370;AT4G00360	12	4	4	4		NC			NC	NC	D	NC	NC	255690_at	3272	2989.2	3130.6	P	P	0.000244	0.000244	3249.7	4290.3	3770	P	P	0.000244	0.000244	0	0.3	0.2	0.4	0.225	0.170783	NC	NC	NC	I	3	-0.2	0.2	D	NC	4366.7	3910	4138.35	P	P
255692_at	AT4G00400	12	4	4	4	I	NC	NC	NC	NC	NC	D	NC	NC	255692_at	902.6	876.5	889.55	P	P	0.00293	0.00415	1270.5	1032.9	1151.7	P	P	0.001221	0.001221	0.6	0.5	0.4	0.4	0.475	0.0957427	I	I	I	I	4	0	-0.1	NC	NC	1012.1	847.7	929.9	P	P
255633_at	AT4G00585	12	4	4	4		NC	NC	D	NC	NC	NC	NC	NC	255633_at	4824.2	4348.7	4586.45	P	P	0.000732	0.000244	3357.8	3734	3545.9	P	P	0.000732	0.000244	-0.5	-0.3	-0.3	-0.1	-0.3	0.163299	D	D	D	NC	3	-0.2	0.2	NC	NC	4401.1	4653.6	4527.35	P	P
255685_s_at	AT4G00620;AT4G00600	12	4	4	4		NC	NC	I	NC	NC	NC	NC	NC	255685_s_at	1127	1081.9	1104.45	P	P	0.001221	0.000244	1465.7	1513.4	1489.55	P	P	0.001221	0.000244	0.4	0.4	0.3	0.4	0.375	0.05	NC	I	NC	NC	3	-0.2	-0.1	NC	NC	1015.1	1084.3	1049.7	P	P
255657_at	AT4G00810	12	4	4	4	NC	NC	NC		NC	NC	D	NC	NC	255657_at	11113.9	10714.2	10914	P	P	0.000244	0.000244	10003	10610.3	10306.6	P	P	0.000244	0.000244	-0.1	-0.1	-0.1	0	-0.075	0.05	NC	NC	NC	NC	4	-0.1	0.1	NC	NC	11426.8	10630.4	11028.6	P	P
255572_at	AT4G01050	12	4	4	4	NC	NC	NC		NC	NC	D	NC	NC	255572_at	4456.1	4674	4565.05	P	P	0.000244	0.000244	4978.9	5363.9	5171.4	P	P	0.000244	0.000244	0.1	0.2	0.1	0.1	0.125	0.05	NC	NC	NC	NC	4	0	-0.1	NC	NC	5362	5496.8	5429.4	P	P
255604_at	AT4G01080	12	4	4	4	NC		NC		NC		I	NC	NC	255604_at	759.3	751.7	755.5	P	P	0.000244	0.000244	686.9	864.9	775.9	P	P	0.001221	0.000244	-0.2	-0.1	0.1	0.1	-0.025	0.15	NC	NC	NC	NC	4	-0.1	0.4	NC	I	668.1	926.1	797.1	P	P
255623_at	AT4G01310	12	4	4	4	NC	NC	NC	I	NC	NC	D	NC	NC	255623_at	10841.5	11644.8	11243.1	P	P	0.000244	0.000244	11738.6	12303	12020.8	P	P	0.000244	0.000244	0.1	0	0.1	0	0.05	0.057735	NC	NC	NC	NC	4	0.1	0	NC	NC	11260.4	11755.1	11507.8	P	P
255575_at	AT4G01430	12	4	4	4	D			D		NC	I	NC	NC	255575_at	2181.4	2651.1	2416.25	P	P	0.000244	0.000244	1311.3	1724.4	1517.85	P	P	0.000244	0.000244	-0.6	-1	-0.4	-0.6	-0.65	0.251661	D	D	D	D	4	0.3	0.4	I	I	3126.8	3114.5	3120.65	P	P
255587_at	AT4G01480	12	4	4	4			NC	D		NC	I	NC	NC	255587_at	5130.1	5318.2	5224.15	P	P	0.000244	0.000244	3882.2	5003.6	4442.9	P	P	0.000244	0.000244	-0.3	-0.4	0	-0.2	-0.225	0.170783	D	D	NC	NC	2	0.1	0.2	NC	I	6167.8	4811.1	5489.45	P	P
255586_at	AT4G01560	12	4	4	4	NC	NC	NC	I	NC	NC		NC	NC	255586_at	1854.4	1806.5	1830.45	P	P	0.000244	0.000244	2077.8	2176.8	2127.3	P	P	0.000244	0.000244	0.2	0.2	0.3	0.2	0.225	0.05	NC	NC	NC	NC	4	0	-0.1	NC	NC	2038.9	2007.7	2023.3	P	P
255590_at	AT4G01610	12	4	4	4		NC	NC			NC	I	NC	NC	255590_at	8969.6	8561	8765.3	P	P	0.000244	0.000244	7289.7	7798.7	7544.2	P	P	0.000244	0.000244	-0.3	-0.2	-0.2	-0.1	-0.2	0.0816497	D	D	NC	NC	2	-0.1	0.1	NC	NC	11282	8808.3	10045.1	P	P
255540_at	AT4G01800	12	4	4	4		NC	NC	I	NC	NC	NC	NC	NC	255540_at	1446.8	1681.2	1564	P	P	0.000244	0.000244	2005.7	1746.7	1876.2	P	P	0.000244	0.000244	0.4	0.2	0.2	0	0.2	0.163299	I	NC	NC	NC	1	0.2	-0.3	NC	NC	1642.6	1486.1	1564.35	P	P
255543_at	AT4G01870	12	4	4	4	D	NC	NC	D		NC	D	NC		255543_at	4505.7	4666.1	4585.9	P	P	0.000732	0.000244	2703.3	1740.8	2222.05	P	P	0.001953	0.000732	-1.3	-1.2	-1.2	-1.2	-1.225	0.05	D	D	D	D	4	0	0	NC	NC	5447.6	5870.5	5659.05	P	P
255513_at	AT4G02060	12	4	4	4	I	NC	NC	I	NC	NC	NC	NC	NC	255513_at	689	851.9	770.45	P	P	0.001953	0.001221	1198.8	887.1	1042.95	P	P	0.000244	0.000244	0.9	0.7	0.8	0.5	0.725	0.170783	I	I	I	I	4	0.3	-0.1	NC	NC	528.1	720.8	624.45	P	P
255522_at	AT4G02260	12	4	4	4		NC	NC	I	NC	NC	NC	NC	NC	255522_at	1141.8	1250.8	1196.3	P	P	0.000244	0.000244	1577.3	1246.4	1411.85	P	P	0.000244	0.000244	0.4	0.3	0.1	0.1	0.225	0.15	I	I	NC	NC	2	0.1	-0.2	NC	NC	1056.4	1330.2	1193.3	P	P
255517_at	AT4G02290	12	4	4	4	I	NC	NC	I	NC	NC	D	NC	NC	255517_at	1314.1	1349.5	1331.8	P	P	0.000732	0.000732	1988.6	2049.1	2018.85	P	P	0.000732	0.000732	0.5	0.5	0.4	0.4	0.45	0.057735	I	I	I	I	4	0	-0.1	NC	NC	1253.1	1230	1241.55	P	P
255524_at	AT4G02330	12	4	4	4	D		NC		NC	NC	I	NC	NC	255524_at	1639.4	1274.4	1456.9	P	P	0.000244	0.000244	776.5	1041.9	909.2	P	P	0.000244	0.000244	-0.8	-0.7	-0.6	-0.4	-0.625	0.170783	D	D	D	D	4	-0.1	0.4	NC	I	1433.5	1791.8	1612.65	P	P
255479_at	AT4G02380	12	4	4	4	D	NC		D	NC	NC	NC	NC	NC	255479_at	23941.4	20982.5	22462	P	P	0.000244	0.000244	15790.1	16050.5	15920.3	P	P	0.000244	0.000244	-0.6	-0.4	-0.6	-0.3	-0.475	0.15	D	D	D	D	4	-0.2	0.1	D	NC	22534.6	22203.9	22369.2	P	P
255482_at	AT4G02510	12	4	4	4	NC	NC	NC	I	NC	NC	NC	NC	NC	255482_at	4190.5	4795.1	4492.8	P	P	0.000244	0.000244	5308.9	4810.8	5059.85	P	P	0.000244	0.000244	0.2	0.1	0.1	0	0.1	0.0816497	NC	NC	NC	NC	4	0	-0.1	NC	NC	4000.5	4386.8	4193.65	P	P
266746_s_at	AT4G02520;AT2G02930	12	4	4	4	D	NC	NC	D		NC				266746_s_at	24034.8	20252.2	22143.5	P	P	0.000244	0.000244	14053.5	15497.3	14775.4	P	P	0.000244	0.000244	-0.8	-0.6	-0.6	-0.5	-0.625	0.125831	D	D	D	D	4	-0.2	0.1	NC	NC	23680.7	20844.7	22262.7	P	P
255444_at	AT4G02560	12	4	4	4		NC	NC	I	NC	NC	NC	NC	NC	255444_at	304.7	391.4	348.05	P	P	0.00415	0.005859	606.6	580.9	593.75	P	P	0.001221	0.000244	0.8	0.6	0.5	0.3	0.55	0.208167	I	I	NC	NC	2	0.3	-0.4	NC	NC	330.1	414.1	372.1	P	P
255495_at	AT4G02720	12	4	4	4		NC	NC	I	NC	NC		NC	NC	255495_at	857.4	1148.3	1002.85	P	P	0.001953	0.001221	1234	982.6	1108.3	P	P	0.000732	0.000244	0.5	0.1	0.2	0.1	0.225	0.189297	I	NC	MI	NC	1	0.3	-0.3	NC	NC	1054.4	1144.1	1099.25	P	P
255457_at	AT4G02770	12	4	4	4	NC	NC	NC	NC	NC	NC	D	NC	NC	255457_at	18151.1	17577.4	17864.2	P	P	0.000244	0.000244	19385	20193	19789	P	P	0.000244	0.000244	0.1	0.2	0.1	0.2	0.15	0.057735	NC	NC	NC	NC	4	0	0.1	NC	NC	17682.5	19546.9	18614.7	P	P
255447_at	AT4G02790	12	4	4	4	NC	NC	NC	I	NC	NC		NC	NC	255447_at	634.4	728.7	681.55	P	P	0.001953	0.001953	796.2	673.1	734.65	P	P	0.00293	0.001953	0.2	0	0	-0.2	0	0.163299	NC	NC	NC	NC	4	0.1	-0.2	NC	NC	593.5	758.5	676	P	P
255456_at	AT4G02920	12	4	4	4			NC	I	NC	NC			NC	255456_at	4112.2	4673.2	4392.7	P	P	0.000244	0.000244	5206.2	4307.3	4756.75	P	P	0.000244	0.000244	0.4	0.2	0.1	0	0.175	0.170783	I	NC	NC	NC	1	0.1	-0.3	NC	D	4810.1	3475.5	4142.8	P	P
255411_at	AT4G03110	12	4	4	4		NC	NC		NC	NC	D	NC	NC	255411_at	1171.6	1054.9	1113.25	P	P	0.000732	0.000244	1221.1	966.7	1093.9	P	P	0.000244	0.000244	0.3	0.1	0	0	0.1	0.141421	I	NC	NC	NC	1	0.2	-0.2	NC	NC	1043.2	988.9	1016.05	P	P
255433_at	AT4G03210	12	4	4	4	I	NC	NC		NC		D	NC	NC	255433_at	4634.9	4474.4	4554.65	P	P	0.001221	0.001953	6670.3	6211	6440.65	P	P	0.001221	0.001221	0.4	0.4	0.4	0.4	0.4	0	I	I	I	I	4	-0.1	0	NC	NC	6000.8	4322.8	5161.8	P	P
255430_at	AT4G03320	9	3	4	2	NC	NC	NC	NC	NC	NC	I	NC	NC	255430_at	402.5	394	398.25	P	P	0.008057	0.01416	308.3	292	300.15	A	P	0.149658	0.018555	-0.6	-0.3	-0.4	-0.3	-0.4	0.141421	NC	NC	NC	NC	4	0	0	NC	NC	241.5	427.1	334.3	P	P
255381_at	AT4G03510	12	4	4	4	D	NC	NC	D	NC	NC	NC	NC	NC	255381_at	1532.3	1277.2	1404.75	P	P	0.000244	0.000244	616.6	830.3	723.45	P	P	0.000244	0.000244	-0.9	-0.9	-0.8	-0.7	-0.825	0.0957427	D	D	D	D	4	-0.2	0.2	NC	NC	1281.1	1056.9	1169	P	P
255328_at	AT4G04350	12	4	4	4	NC		NC	I	NC	NC		NC	NC	255328_at	1157.1	1208.5	1182.8	P	P	0.000732	0.000732	1170.6	1137.2	1153.9	P	P	0.000244	0.000244	0.2	0.2	-0.1	-0.1	0.05	0.173205	NC	NC	NC	NC	4	0	-0.4	NC	MD	997.6	1034.3	1015.95	P	P
255294_at	AT4G04750	11	4	3	4	I	NC	NC		NC	NC	NC	NC	NC	255294_at	265.1	280.1	272.6	P	P	0.037598	0.037598	476.8	384.4	430.6	P	P	0.01416	0.023926	0.8	0.7	0.3	0.4	0.55	0.238048	I	I	I	I	4	-0.2	-0.3	NC	NC	197.1	195.8	196.45	P	M
255302_at	AT4G04830	12	4	4	4	NC	NC	NC	NC	NC	NC	I	NC	NC	255302_at	1509.4	2029.9	1769.65	P	P	0.00415	0.005859	1671	2103.8	1887.4	P	P	0.008057	0.00293	0.1	0.1	0.1	0.1	0.1	0	NC	NC	NC	NC	4	-0.1	0.2	NC	NC	1833.8	1828.8	1831.3	P	P
255298_at	AT4G04840	12	4	4	4	I	NC	NC		NC		NC	NC	NC	255298_at	642.1	718.2	680.15	P	P	0.001953	0.001221	932.9	971.8	952.35	P	P	0.000732	0.000732	0.6	0.4	0.5	0.3	0.45	0.129099	I	I	I	I	4	0	-0.1	NC	NC	912.2	610.3	761.25	P	P
255277_at	AT4G04890	12	4	4	4		NC	NC	I	NC	NC	NC	NC	NC	255277_at	965.4	891.9	928.65	P	P	0.000244	0.000244	1648.1	1388.7	1518.4	P	P	0.000244	0.000244	0.7	0.7	0.4	0.5	0.575	0.15	I	I	NC	I	3	0	-0.2	NC	NC	979.5	1068.3	1023.9	P	P
255255_at	AT4G05070	12	4	4	4	D	NC	NC	D	NC	NC		NC	NC	255255_at	2522.4	2466.5	2494.45	P	P	0.000244	0.000244	1921.9	1681.2	1801.55	P	P	0.000244	0.000244	-0.5	-0.4	-0.5	-0.6	-0.5	0.0816497	D	D	D	D	4	0	-0.1	NC	NC	2298.3	2167.2	2232.75	P	P
255221_at	AT4G05150	12	4	4	4			NC	D	NC	NC		NC	NC	255221_at	6732	5021.2	5876.6	P	P	0.000244	0.000244	4815.1	6584	5699.55	P	P	0.000244	0.000244	-0.5	-0.1	0	0.3	-0.075	0.330404	D	NC	NC	NC	1	-0.3	0.4	NC	I	5025	5890.2	5457.6	P	P
255248_at	AT4G05180	12	4	4	4	NC	NC	NC	NC	NC	NC	D	NC	NC	255248_at	26166.7	27108.8	26637.8	P	P	0.000732	0.000732	30376.1	28230	29303	P	P	0.000732	0.000732	0.2	0.2	0.1	0	0.125	0.0957427	NC	NC	NC	NC	4	0	-0.1	NC	NC	27625.5	26895.9	27260.7	P	P
255236_at	AT4G05520	12	4	4	4	NC	NC	NC	I	NC	NC	NC	NC	NC	255236_at	182.5	269.6	226.05	P	P	0.023926	0.018555	207.6	243.4	225.5	P	P	0.030273	0.010742	0.3	0.2	0.2	0	0.175	0.125831	NC	NC	NC	NC	4	0.1	0.1	NC	NC	204.2	193.1	198.65	P	P
255128_at	AT4G08310	12	4	4	4		NC	NC	I	NC	NC	NC	NC	NC	255128_at	606.6	783	694.8	P	P	0.010742	0.001221	1060.8	688.6	874.7	P	P	0.005859	0.00415	0.7	0.3	0.3	-0.1	0.3	0.326599	I	NC	I	NC	2	0.4	-0.4	NC	NC	633.7	610.1	621.9	P	P
255093_s_at	AT4G08580	12	4	4	4		NC	NC	I	NC	NC	NC	NC	NC	255093_s_at	375.3	402.3	388.8	P	P	0.008057	0.018555	666.3	509.8	588.05	P	P	0.010742	0.008057	0.5	0.6	0.2	0.2	0.375	0.206155	NC	I	NC	NC	3	0	-0.3	NC	NC	394.2	270.2	332.2	P	P
255110_at	AT4G08770	12	4	4	4				D	NC	NC		NC		255110_at	6329	4649.3	5489.15	P	P	0.000732	0.000244	3217.1	4905.2	4061.15	P	P	0.000244	0.000244	-1	-0.6	-0.4	0	-0.5	0.416333	D	D	D	NC	3	-0.4	0.5	D	I	6211.6	6948.6	6580.1	P	P
255111_at	AT4G08770;AT4G08780	12	4	4	4				D	NC	NC	I	NC		255111_at	2665.8	1978	2321.9	P	P	0.000244	0.000244	1207.2	1461.8	1334.5	P	P	0.00415	0.000244	-1.2	-1	-0.7	-0.2	-0.775	0.434933	D	D	D	NC	3	-0.4	0.7	D	I	2668.7	3692.3	3180.5	P	P
255116_at	AT4G08850	12	4	4	4		NC	NC				I	NC	NC	255116_at	1909.3	2051.1	1980.2	P	P	0.000244	0.000244	1836.6	1857.7	1847.15	P	P	0.000244	0.000244	-0.4	-0.3	-0.2	-0.1	-0.25	0.129099	D	D	NC	NC	2	-0.1	0.1	NC	NC	1998.9	2688.1	2343.5	P	P
255078_at	AT4G09010	12	4	4	4		NC	NC	I	NC	NC	D	NC	NC	255078_at	4710.7	4539.7	4625.2	P	P	0.001953	0.001953	6956.2	5336.4	6146.3	P	P	0.001953	0.00293	0.4	0.4	0.1	0.2	0.275	0.15	I	I	NC	NC	2	-0.1	-0.3	NC	NC	4843.9	5691.5	5267.7	P	P
255071_at	AT4G09040	12	4	4	4	NC	NC	NC	I	NC	NC	NC	NC	NC	255071_at	402.5	396.9	399.7	P	P	0.001221	0.000732	445.4	310	377.7	P	P	0.001953	0.00415	0	0.2	0.1	0	0.075	0.0957427	NC	NC	NC	NC	4	-0.1	-0.2	NC	NC	353.1	423.5	388.3	P	P
255008_at	AT4G10060	12	4	4	4		NC	NC	I	NC	NC	NC	NC	NC	255008_at	825.3	1151.7	988.5	P	P	0.000244	0.000244	1354.6	1257.2	1305.9	P	P	0.000244	0.000244	0.6	0.2	0.5	0	0.325	0.275379	I	I	I	NC	3	0.3	-0.2	NC	NC	965.7	1149.1	1057.4	P	P
255807_at	AT4G10280;AT4G10270	12	4	4	4			NC	D	NC	NC				255807_at	3352.6	2849.3	3100.95	P	P	0.000244	0.000244	2077.3	2726.9	2402.1	P	P	0.000244	0.000244	-0.7	-0.4	-0.3	0	-0.35	0.288675	D	D	D	NC	3	-0.3	0.4	NC	I	1883.1	2155.7	2019.4	P	P
254992_at	AT4G10710	12	4	4	4		NC		I	NC	NC	NC	NC	NC	254992_at	813.8	989	901.4	P	P	0.001953	0.000732	1211	1021.7	1116.35	P	P	0.001221	0.000244	0.4	0.2	0.2	0	0.2	0.163299	I	NC	NC	NC	1	0.3	-0.1	I	NC	855.6	750.6	803.1	P	P
254955_at	AT4G10920	12	4	4	4	NC	NC	NC		NC	NC	I	NC	NC	254955_at	340.2	316.7	328.45	P	P	0.005859	0.001221	217.1	243.8	230.45	P	P	0.005859	0.00293	-0.3	-0.2	-0.2	-0.4	-0.275	0.0957427	NC	NC	NC	NC	4	0	-0.1	NC	NC	398.3	260.9	329.6	P	P
254966_at	AT4G11110	12	4	4	4		NC	NC	I	NC	NC	NC	NC	NC	254966_at	437	560.5	498.75	P	P	0.000244	0.001221	675.1	547.1	611.1	P	P	0.000244	0.000244	0.4	0.4	0.2	0.1	0.275	0.15	I	I	NC	NC	2	0.2	-0.3	NC	NC	506.9	366.6	436.75	P	P
254907_at	AT4G11190	12	4	4	4					NC		I	NC	NC	254907_at	1021.7	1259.9	1140.8	P	P	0.000244	0.000244	1238.3	1736.4	1487.35	P	P	0.000244	0.000244	0.4	-0.1	0.7	0.4	0.35	0.331662	I	NC	I	I	3	0.4	0.4	I	MI	1227	825.8	1026.4	P	P
254914_at	AT4G11290	12	4	4	4				D	NC	NC	I	NC	NC	254914_at	4563.1	3126.5	3844.8	P	P	0.000244	0.000244	2987.3	3769.8	3378.55	P	P	0.000244	0.000244	-0.5	-0.1	-0.2	0.3	-0.125	0.330404	D	NC	NC	I	1	-0.4	0.3	D	I	3941.9	4631.5	4286.7	P	P
254919_at	AT4G11360	12	4	4	4	D	NC	NC		NC	NC	NC	NC	NC	254919_at	3534.6	3240.3	3387.45	P	P	0.000244	0.000244	2280.8	2656	2468.4	P	P	0.000244	0.000244	-0.6	-0.5	-0.4	-0.2	-0.425	0.170783	D	D	D	D	4	-0.1	0.2	NC	NC	3849	3421.4	3635.2	P	P
254873_at	AT4G11420	12	4	4	4		NC	NC	I	NC	NC		NC	NC	254873_at	2245.5	2335	2290.25	P	P	0.000732	0.000244	2670.8	2511.2	2591	P	P	0.000244	0.000244	0.3	0.3	0.2	0.1	0.225	0.0957427	I	NC	NC	NC	1	0.1	-0.2	NC	NC	1949	2193.8	2071.4	P	P
254889_at	AT4G11650	12	4	4	4						NC	I	NC	NC	254889_at	27103.9	22672.3	24888.1	P	P	0.000244	0.000244	18194	23597.9	20896	P	P	0.000244	0.000244	-0.5	-0.2	-0.3	0	-0.25	0.208167	D	D	NC	NC	2	-0.3	0.3	D	I	28482.9	29751.8	29117.3	P	P
254833_s_at	AT4G12280	12	4	4	4				D		NC	I	NC	NC	254833_s_at	1960.2	1752.1	1856.15	P	P	0.000244	0.000244	1033.2	1448.4	1240.8	P	P	0.000244	0.000244	-0.9	-0.7	-0.3	0	-0.475	0.403113	D	D	NC	NC	2	-0.3	0.6	D	I	1593.2	1705.8	1649.5	P	P
254815_at	AT4G12420	12	4	4	4		NC	NC	I		NC	D	NC	NC	254815_at	4362.8	5247.9	4805.35	P	P	0.000244	0.000244	6207.7	5705.4	5956.55	P	P	0.000244	0.000244	0.4	0.2	0.3	0	0.225	0.170783	I	NC	NC	NC	1	0.2	-0.2	NC	NC	4221.4	5115.5	4668.45	P	P
254820_s_at	AT4G12510;AT4G12520	12	4	4	4			NC	D	NC	NC		NC	NC	254820_s_at	5303.6	5321	5312.3	P	P	0.000732	0.000732	3929.7	6116.9	5023.3	P	P	0.000732	0.000244	-0.4	-0.4	0.1	0.1	-0.15	0.288675	D	D	NC	NC	2	0	0.6	NC	I	5490.8	4867.7	5179.25	P	P
254828_at	AT4G12550	12	4	4	4			NC	D	NC	NC	I	NC	NC	254828_at	8811	9741.6	9276.3	P	P	0.000244	0.000244	4266.3	7457.2	5861.75	P	P	0.000732	0.000732	-1	-1	-0.2	-0.2	-0.6	0.46188	D	D	MD	D	3	0	0.8	NC	I	8030.8	9145.3	8588.05	P	P
254824_s_at	AT4G12620	12	4	4	4	I	NC	NC		NC	NC		NC	NC	254824_s_at	283.4	261.3	272.35	P	P	0.023926	0.030273	437.5	342.6	390.05	P	P	0.01416	0.000732	0.6	0.5	0.6	0.5	0.55	0.057735	I	I	I	I	4	0	0	NC	NC	147.4	386	266.7	P	P
254746_at	AT4G12980	12	4	4	4	I	NC	NC	NC	NC	NC	D	NC	NC	254746_at	630.6	778.1	704.35	P	P	0.008057	0.00415	1059.3	988	1023.65	P	P	0.00293	0.00415	1	0.7	0.4	0.4	0.625	0.287228	I	I	I	I	4	0.1	-0.3	NC	NC	681.1	569.2	625.15	P	P
254764_at	AT4G13250	12	4	4	4		NC	NC	I	NC	NC		NC	NC	254764_at	6005.2	6412.9	6209.05	P	P	0.000244	0.000244	4988.8	5794.4	5391.6	P	P	0.000244	0.000244	-0.3	-0.3	0	-0.1	-0.175	0.15	D	D	NC	NC	2	0.1	0.3	NC	NC	6074	6411.2	6242.6	P	P
254723_at	AT4G13510	12	4	4	4		NC	NC	D	NC	NC		NC	NC	254723_at	3477	2651	3064	P	P	0.000244	0.000732	2561.7	3008.1	2784.9	P	P	0.000732	0.000244	-0.6	-0.2	-0.2	0	-0.25	0.251661	D	D	NC	NC	2	-0.4	0.2	NC	NC	3462.5	3311.5	3387	P	P
254686_at	AT4G13720	12	4	4	4		NC	NC	I	NC	NC	NC	NC	NC	254686_at	1370.2	1918.1	1644.15	P	P	0.000244	0.000244	1854.2	1642.4	1748.3	P	P	0.000244	0.000244	0.3	0.1	0.2	0	0.15	0.129099	I	NC	NC	NC	1	0.3	-0.1	NC	NC	1481.5	1521.6	1501.55	P	P
245385_at	AT4G14020	12	4	4	4			NC	D	NC	NC	NC	NC	NC	245385_at	3873.4	3466.4	3669.9	P	P	0.000244	0.000244	1994	2932.9	2463.45	P	P	0.000244	0.000244	-0.9	-0.8	-0.4	-0.2	-0.575	0.330404	D	D	D	NC	3	-0.1	0.5	NC	I	3823.3	3529.3	3676.3	P	P
245267_at	AT4G14060	12	4	4	4	NC	NC	NC			NC	I	NC	NC	245267_at	569	658.1	613.55	P	P	0.000732	0.001953	582.2	532.2	557.2	P	P	0.000732	0.000732	-0.2	-0.1	-0.3	-0.2	-0.2	0.0816497	NC	NC	NC	NC	4	0	-0.1	NC	NC	463.1	389.9	426.5	P	P
245284_at	AT4G14210	12	4	4	4		NC	NC	I	NC	NC		NC	NC	245284_at	2788.8	2946.3	2867.55	P	P	0.000244	0.000244	3537.4	3128.6	3333	P	P	0.000244	0.000244	0.4	0.4	0.2	0.1	0.275	0.15	I	I	NC	NC	2	0.1	-0.3	NC	NC	2581.2	2750.7	2665.95	P	P
245329_at	AT4G14365	12	4	4	4	NC	NC	NC	D	NC	NC	I		NC	245329_at	1080.6	884.7	982.65	P	P	0.000244	0.000244	1033.2	1044.4	1038.8	P	P	0.000244	0.000244	0	0.2	0	0.2	0.1	0.11547	NC	NC	NC	NC	4	-0.1	-0.2	NC	NC	1117.9	1293.3	1205.6	P	P
245359_at	AT4G14430	12	4	4	4		NC	NC	D	NC	NC	NC	NC	NC	245359_at	3507.3	2615.9	3061.6	P	P	0.000244	0.000244	2015.6	2334.3	2174.95	P	P	0.000244	0.000244	-0.5	-0.3	-0.4	-0.1	-0.325	0.170783	D	D	D	NC	3	-0.2	0.1	NC	NC	2739.9	2814.3	2777.1	P	P
245576_at	AT4G14770	11	3	4	4		NC	NC	I	NC	NC	NC	NC	NC	245576_at	499.5	551	525.25	A	P	0.067627	0.046143	690.7	585.6	638.15	P	P	0.01416	0.018555	0.7	0.6	0.4	0.3	0.5	0.182574	I	I	I	NC	3	0.3	-0.6	NC	NC	422.9	395.9	409.4	P	P
245532_at	AT4G15110	12	4	4	4		NC	NC	I	NC	NC	NC	NC	NC	245532_at	1897.8	2160	2028.9	P	P	0.000244	0.000244	2214.3	2342.7	2278.5	P	P	0.000244	0.000244	0.3	0	0.3	0.2	0.2	0.141421	NC	NC	I	NC	3	0.2	0	NC	NC	2055.9	2297.6	2176.75	P	P
245253_at	AT4G15440	12	4	4	4	I	NC	NC			NC	I	NC	NC	245253_at	1714.2	1761.9	1738.05	P	P	0.018555	0.023926	3167.8	3471.7	3319.75	P	P	0.008057	0.00293	0.9	0.9	0.7	0.9	0.85	0.1	I	I	I	I	4	0	0	NC	NC	1876.4	2066.4	1971.4	P	P
245352_at	AT4G15490	12	4	4	4	D	NC	NC					NC	NC	245352_at	1424.8	1226.6	1325.7	P	P	0.000244	0.000244	862.2	1024.3	943.25	P	P	0.000244	0.000244	-0.7	-0.5	-0.5	-0.4	-0.525	0.125831	D	D	D	D	4	-0.1	0.3	NC	NC	959.6	1213.8	1086.7	P	P
245528_at	AT4G15530	12	4	4	4	D	NC	NC	D		NC	I	NC	NC	245528_at	3312.4	3121.1	3216.75	P	P	0.000732	0.000732	2460	2305.3	2382.65	P	P	0.001221	0.000732	-0.5	-0.4	-0.6	-0.4	-0.475	0.0957427	D	D	D	D	4	-0.2	0	NC	NC	3209.9	2926.6	3068.25	P	P
245277_at	AT4G15550	12	4	4	4	D	NC	NC	NC	NC	NC		NC	NC	245277_at	1883.7	1970	1926.85	P	P	0.000244	0.000244	1625.1	1533.1	1579.1	P	P	0.000244	0.000244	-0.4	-0.3	-0.4	-0.3	-0.35	0.057735	D	D	D	D	4	0	0	NC	NC	1783.2	1659.8	1721.5	P	P
245281_at	AT4G15560	12	4	4	4			NC	I	NC	NC	NC	NC	NC	245281_at	8393.2	9629.7	9011.45	P	P	0.000244	0.000244	11877.5	9351.1	10614.3	P	P	0.000244	0.000244	0.4	0.3	0.2	0	0.225	0.170783	I	I	NC	NC	2	0.2	-0.3	NC	D	7344.9	7657.5	7501.2	P	P
245317_at	AT4G15610	12	4	4	4		NC	NC			NC	I	NC	NC	245317_at	3091.4	2565.4	2828.4	P	P	0.000244	0.000244	2643.7	2775.7	2709.7	P	P	0.000732	0.000244	-0.3	-0.2	-0.1	0	-0.15	0.129099	D	NC	NC	NC	1	-0.1	0.1	NC	NC	3187.8	2366.9	2777.35	P	P
245501_at	AT4G15620	10	3	3	4	I	NC	NC		NC	NC	NC	NC	NC	245501_at	121.9	181.5	151.7	A	P	0.129639	0.046143	524.5	478.5	501.5	P	P	0.00415	0.001221	1.3	1	1.7	0.9	1.225	0.359398	I	I	I	I	4	0.3	-0.1	NC	NC	188.8	141.7	165.25	P	A
245334_at	AT4G15800	12	4	4	4			NC	D	NC	NC	NC	NC	NC	245334_at	2220.8	1830.6	2025.7	P	P	0.00415	0.00415	1346	2067.2	1706.6	P	P	0.00415	0.00293	-0.4	-0.5	-0.1	-0.1	-0.275	0.206155	D	D	NC	NC	2	0	0.4	NC	I	2728.6	2284.5	2506.55	P	P
245343_at	AT4G15830	12	4	4	4		NC	NC	I	NC	NC		NC	NC	245343_at	310.7	533.3	422	P	P	0.01416	0.00415	612.5	522.4	567.45	P	P	0.000732	0.001221	0.8	0.2	0.7	0.2	0.475	0.320156	I	NC	NC	NC	1	0.8	-0.4	NC	NC	536.7	524.3	530.5	P	P
245523_at	AT4G15910	12	4	4	4				D	NC	NC			NC	245523_at	4562.1	3224.4	3893.25	P	P	0.000244	0.000244	2704.5	3935.8	3320.15	P	P	0.000244	0.000244	-0.6	-0.1	-0.3	0.2	-0.2	0.33665	D	NC	D	NC	2	-0.5	0.3	D	I	4288.7	5146.2	4717.45	P	P
245483_at	AT4G16190	12	4	4	4		NC	NC			NC	I	NC	NC	245483_at	19355.1	17077	18216	P	P	0.000244	0.000244	13457.1	15750.3	14603.7	P	P	0.000244	0.000244	-0.5	-0.3	-0.4	-0.2	-0.35	0.129099	D	D	D	NC	3	-0.2	0.2	NC	NC	17875.1	19312.5	18593.8	P	P
245393_at	AT4G16260	12	4	4	4			NC			NC	I	NC	NC	245393_at	25436.8	23908.9	24672.8	P	P	0.000732	0.000732	14517.7	19850.7	17184.2	P	P	0.000732	0.000244	-0.8	-0.6	-0.5	-0.3	-0.55	0.208167	D	D	D	NC	3	-0.1	0.3	NC	I	25367.2	23981.6	24674.4	P	P
245492_at	AT4G16340	12	4	4	4		NC		I	NC	NC	NC	NC	NC	245492_at	468.3	649.7	559	P	P	0.005859	0.001953	713.2	706	709.6	P	P	0.001953	0.000732	0.4	0.1	0.8	0.3	0.4	0.294392	MI	NC	I	MI	2	0.4	0.1	I	NC	476.1	488.5	482.3	P	P
245494_at	AT4G16390	12	4	4	4	NC	NC	NC	I	NC	NC		NC	NC	245494_at	1758.5	1953.8	1856.15	P	P	0.000244	0.000244	2236.9	2383.6	2310.25	P	P	0.000244	0.000244	0.2	0.2	0.2	0.1	0.175	0.05	NC	NC	NC	NC	4	0.1	0	NC	NC	1976.7	2032	2004.35	P	P
245394_at	AT4G16450	12	4	4	4			NC	D	NC	NC	NC	NC	NC	245394_at	9577.3	7673.1	8625.2	P	P	0.000732	0.001221	6314.2	7984.8	7149.5	P	P	0.001953	0.000732	-0.5	-0.3	-0.3	0	-0.275	0.206155	D	D	NC	NC	2	-0.2	0.3	NC	I	10986.3	8746.1	9866.2	P	P
245323_at	AT4G16500	12	4	4	4			NC	D	NC	NC	NC	NC	NC	245323_at	5357.7	4855	5106.35	P	P	0.000244	0.000244	3980.6	3758.5	3869.55	P	P	0.000244	0.000244	-0.7	-0.4	-0.4	-0.2	-0.425	0.206155	D	D	D	NC	3	-0.2	0.3	NC	I	5378.6	5633.1	5505.85	P	P
245454_at	AT4G16920	12	4	4	4			NC	I	NC	NC	NC	NC	NC	245454_at	120.8	216.6	168.7	P	P	0.01416	0.005859	375.3	177	276.15	P	P	0.005859	0.023926	0.8	0.9	0	0.4	0.525	0.411299	I	I	NC	NC	2	0.1	-0.5	NC	D	208	148.5	178.25	P	P
245318_at	AT4G16980	12	4	4	4	NC	NC	NC	NC		NC	D	NC	NC	245318_at	15318.8	14202.3	14760.5	P	P	0.000244	0.000244	17106.7	16359.4	16733	P	P	0.000244	0.000244	0.1	0.2	0.1	0.2	0.15	0.057735	NC	NC	NC	NC	4	0	0	NC	NC	13653	14646.9	14150	P	P
245264_at	AT4G17245	12	4	4	4	D	NC	NC		NC	NC	D	NC	NC	245264_at	1778.7	1357.9	1568.3	P	P	0.000244	0.000244	1045.2	863.6	954.4	P	P	0.000244	0.000244	-0.6	-0.4	-1	-0.7	-0.675	0.25	D	D	D	D	4	-0.4	-0.4	NC	NC	1561.2	1451.8	1506.5	P	P
245413_at	AT4G17300	12	4	4	4	NC	NC	NC		NC	NC	D	NC	NC	245413_at	476.7	562.3	519.5	P	P	0.00293	0.001221	624.1	537.5	580.8	P	P	0.001221	0.000244	0.3	0.2	0.2	0.1	0.2	0.0816497	NC	NC	NC	NC	4	0.1	-0.2	NC	NC	612.4	520.4	566.4	P	P
245415_at	AT4G17330	12	4	4	4		NC	NC	I	NC	NC	NC	NC	NC	245415_at	1835.2	2312.4	2073.8	P	P	0.000244	0.000244	2429.8	2070.6	2250.2	P	P	0.000244	0.000244	0.4	0.3	0.2	0.1	0.25	0.129099	I	NC	NC	NC	1	0.2	-0.1	NC	NC	1528.2	1730.1	1629.15	P	P
245362_at	AT4G17460	12	4	4	4	NC	NC	NC	NC	NC	NC	D	NC	NC	245362_at	560.7	499.3	530	P	P	0.000732	0.000244	542.9	523.7	533.3	P	P	0.000244	0.000244	0.2	0.2	0.1	0.3	0.2	0.0816497	NC	NC	NC	NC	4	-0.1	-0.1	NC	NC	681.9	614.8	648.35	P	P
245422_at	AT4G17470	6	3	2	1	D	NC	NC	D	NC		I		NC	245422_at	503	568.8	535.9	P	P	0.000244	0.00415	154.3	271.5	212.9	A	P	0.246094	0.018555	-1.2	-1.2	-1	-0.9	-1.075	0.15	D	D	D	D	4	-0.2	0.6	NC	NC	410.2	558.1	484.15	P	P
245252_at	AT4G17500	12	4	4	4	D	NC	NC	D	NC	NC		NC	NC	245252_at	1058.5	1179.8	1119.15	P	P	0.000732	0.001221	820.6	856.4	838.5	P	P	0.001221	0.001221	-0.5	-0.6	-0.6	-0.5	-0.55	0.057735	D	D	D	D	4	0	0	NC	NC	1224	1078.6	1151.3	P	P
245357_at	AT4G17560	12	4	4	4	NC	NC	NC		NC		D	NC	NC	245357_at	4046.6	4245.5	4146.05	P	P	0.000244	0.000244	4540.4	4307.3	4423.85	P	P	0.000244	0.000244	0.1	0.1	-0.1	0	0.025	0.0957427	NC	NC	NC	NC	4	-0.1	0	NC	NC	4554.7	3652.9	4103.8	P	P
245354_at	AT4G17600	12	4	4	4	NC	NC	NC	I	NC	NC	NC	NC	NC	245354_at	9211.1	8377.8	8794.45	P	P	0.000732	0.000732	8893.1	10448.7	9670.9	P	P	0.000732	0.000732	0.2	0.1	0.1	0	0.1	0.0816497	NC	NC	NC	NC	4	0	-0.1	NC	NC	9702	9403.9	9552.95	P	P
245263_at	AT4G17740	12	4	4	4		NC	NC	I	NC	NC	NC	NC	NC	245263_at	1211.6	1532.2	1371.9	P	P	0.000244	0.000244	1660.4	1525.2	1592.8	P	P	0.000244	0.000244	0.5	0.2	0.1	0	0.2	0.216025	I	NC	NC	NC	1	0.3	-0.3	NC	NC	1231.8	1377.3	1304.55	P	P
254707_at	AT4G18010	12	4	4	4	D	NC	NC			NC			NC	254707_at	1054.9	990.5	1022.7	P	P	0.000244	0.000244	681.2	677.1	679.15	P	P	0.001953	0.000244	-0.8	-0.7	-0.5	-0.6	-0.65	0.129099	D	D	D	D	4	-0.1	0	NC	NC	1038.4	818.5	928.45	P	P
254679_at	AT4G18120	12	4	4	4			NC	I	NC	NC	NC	NC	NC	254679_at	546.1	607.9	577	P	P	0.000244	0.000244	922.5	482.9	702.7	P	P	0.000732	0.000244	0.5	0.4	0.1	-0.3	0.175	0.359398	I	NC	NC	NC	1	0.2	-0.6	NC	D	549.2	534.1	541.65	P	P
254659_at	AT4G18240	12	4	4	4	NC	NC	NC	I	NC	NC	NC	NC	NC	254659_at	1666.4	1681.1	1673.75	P	P	0.000244	0.000244	1452.6	1753.2	1602.9	P	P	0.000244	0.000244	-0.1	-0.1	0.1	0	-0.025	0.0957427	NC	NC	NC	NC	4	0.1	0	NC	NC	1459.5	1520.7	1490.1	P	P
254630_at	AT4G18360	11	3	4	4			NC	D	NC	NC		NC	NC	254630_at	1206.6	1089	1147.8	P	P	0.046143	0.046143	867.6	966.8	917.2	A	P	0.067627	0.023926	-0.4	-0.3	0	-0.1	-0.2	0.182574	D	D	NC	NC	2	0.1	0.2	NC	I	1374.6	1227.9	1301.25	P	P
254623_at	AT4G18480	12	4	4	4	NC	NC	NC	I	NC	NC	D	NC	NC	254623_at	9530.7	9803.9	9667.3	P	P	0.000244	0.000244	9944.3	9298.9	9621.6	P	P	0.000244	0.000244	0.2	0.1	0.1	-0.1	0.075	0.125831	NC	NC	NC	NC	4	0.1	0	NC	NC	9597.3	8911.1	9254.2	P	P
254645_at	AT4G18520	7	2	3	2		NC	NC	I	NC	NC	NC		NC	254645_at	202.3	154.4	178.35	A	M	0.219482	0.056152	277.8	303.8	290.8	P	P	0.046143	0.037598	0.4	0.8	0.6	0.8	0.65	0.191485	I	NC	I	NC	2	-0.3	0.1	NC	NC	162	169.8	165.9	P	A
254642_at	AT4G18810	12	4	4	4		NC	NC	I	NC	NC	NC	NC	NC	254642_at	737.6	948.5	843.05	P	P	0.00415	0.001953	1181.8	993.8	1087.8	P	P	0.00415	0.001953	0.6	0.3	0.3	0.1	0.325	0.206155	I	NC	I	NC	2	0.4	-0.4	NC	NC	737.4	933.1	835.25	P	P
254643_at	AT4G18820	12	4	4	4		NC	NC	I	NC	NC	NC	NC	NC	254643_at	654.5	694.2	674.35	P	P	0.000244	0.000244	880.6	875.8	878.2	P	P	0.000244	0.001221	0.9	0.5	0.4	0.3	0.525	0.262996	I	I	MI	NC	2	0.3	-0.3	NC	NC	498.2	551.3	524.75	P	P
254593_s_at	AT4G18900	12	4	4	4	NC	NC	NC	I	NC	NC	NC	NC	NC	254593_s_at	498.4	517.6	508	P	P	0.00415	0.001221	617.5	587	602.25	P	P	0.001953	0.000732	0.4	0.2	0.2	0.2	0.25	0.1	NC	NC	NC	NC	4	-0.1	0.1	NC	NC	470.7	467.8	469.25	P	P
254609_at	AT4G18970	12	4	4	4		NC	NC	I	NC	NC	NC	NC	NC	254609_at	1294.4	1280.9	1287.65	P	P	0.001953	0.001221	1960.9	1828.1	1894.5	P	P	0.000732	0.001953	0.6	0.4	0.2	0.1	0.325	0.221736	I	I	I	NC	3	0.2	-0.2	NC	NC	1593.6	1273.8	1433.7	P	P
254596_at	AT4G18975	12	4	4	4		NC		I	NC	NC	NC	NC	NC	254596_at	811.8	954.6	883.2	P	P	0.00415	0.001953	1043.6	998.9	1021.25	P	P	0.001221	0.001953	0.6	0.3	0.4	0	0.325	0.25	I	NC	NC	NC	1	0.4	-0.3	I	NC	652.2	540.5	596.35	P	P
254564_at	AT4G19170	12	4	4	4			NC			NC	D	NC	NC	254564_at	736.7	921.1	828.9	P	P	0.010742	0.023926	1563.4	1061	1312.2	P	P	0.001953	0.018555	0.8	0.8	0.2	0.2	0.5	0.34641	I	I	NC	NC	2	-0.1	-0.6	NC	D	685	784.4	734.7	P	P
254578_at	AT4G19410	12	4	4	4	D	NC	NC		NC		D	NC	NC	254578_at	16565.5	15232.9	15899.2	P	P	0.000732	0.000244	12563.8	12270.4	12417.1	P	P	0.000244	0.000244	-0.5	-0.3	-0.4	-0.2	-0.35	0.129099	D	D	D	D	4	-0.1	0.1	NC	NC	13438.7	14042.9	13740.8	P	P
254573_at	AT4G19420	12	4	4	4		NC	NC		NC	NC	I	NC	NC	254573_at	2867.4	2661.6	2764.5	P	P	0.000244	0.000244	2142.2	2066	2104.1	P	P	0.000244	0.000244	-0.2	-0.3	-0.5	-0.6	-0.4	0.182574	NC	D	D	D	1	0.2	-0.2	NC	NC	2814.1	3179.4	2996.75	P	P
254574_at	AT4G19430	12	4	4	4	I	NC	NC			NC			NC	254574_at	2184.3	1661.8	1923.05	P	P	0.001953	0.005859	2365.6	3674.1	3019.85	P	P	0.001953	0.000732	0.8	0.7	0.8	0.7	0.75	0.057735	I	I	I	I	4	0	0	NC	NC	2553.2	1524.3	2038.75	P	P
254527_at	AT4G19610	12	4	4	4	NC	NC	NC	I	NC	NC	NC	NC	NC	254527_at	351.9	369.7	360.8	P	P	0.000732	0.00293	589.6	394.6	492.1	P	P	0.001221	0.001953	0.5	0.9	0.1	0.4	0.475	0.330404	NC	NC	NC	NC	4	-0.1	-0.2	NC	NC	250.4	235.7	243.05	P	P
254550_at	AT4G19690	9	3	2	4			NC				D	NC	NC	254550_at	39.8	150.4	95.1	A	P	0.303711	0.037598	247.8	195	221.4	P	P	0.00293	0.01416	1.9	0.6	2.1	0.2	1.2	0.94163	I	I	NC	NC	2	1.4	-0.6	NC	D	349.6	20.7	185.15	P	A
254535_at	AT4G19710	12	4	4	4		NC	NC	I	NC	NC		NC	NC	254535_at	1070.3	1008.3	1039.3	P	P	0.000244	0.000244	1259.8	1063.5	1161.65	P	P	0.000244	0.000244	0.3	0.4	0	-0.1	0.15	0.238048	NC	I	NC	NC	3	0.1	-0.3	NC	NC	872.7	909.3	891	P	P
254505_at	AT4G19985	12	4	4	4		NC	NC	I	NC	NC	NC	NC	NC	254505_at	993.7	963.1	978.4	P	P	0.000244	0.000244	1630.7	1039.5	1335.1	P	P	0.000244	0.000244	0.5	0.5	0.3	0.1	0.35	0.191485	I	I	NC	NC	2	0.2	-0.4	NC	NC	1040.9	973.4	1007.15	P	P
254496_at	AT4G20070	12	4	4	4	NC	NC	NC	NC	NC	NC	D	NC	NC	254496_at	1448.3	1547.2	1497.75	P	P	0.000244	0.000244	1673	1218.7	1445.85	P	P	0.000244	0.000244	0.1	0	0.1	-0.1	0.025	0.0957427	NC	NC	NC	NC	4	0.1	-0.1	NC	NC	1470.3	1295.4	1382.85	P	P
254500_at	AT4G20110	12	4	4	4	NC	NC	NC	NC	NC	NC	I	NC	NC	254500_at	633.4	512.8	573.1	P	P	0.000732	0.000244	531.4	597.8	564.6	P	P	0.001953	0.000244	0.2	0.3	-0.1	0.2	0.15	0.173205	NC	NC	NC	NC	4	-0.1	-0.1	NC	NC	555.1	605.2	580.15	P	P
254502_at	AT4G20130	12	4	4	4		NC	NC	I	NC	NC	NC	NC	NC	254502_at	708.2	873	790.6	P	P	0.000732	0.000244	1148.5	1045.2	1096.85	P	P	0.000244	0.000244	0.8	0.4	0.6	0.2	0.5	0.258199	I	I	I	NC	3	0.4	-0.2	NC	NC	803.2	725	764.1	P	P
254515_at	AT4G20270	12	4	4	4	I	NC	NC	I	NC	NC	NC	NC	NC	254515_at	731.2	923.6	827.4	P	P	0.000244	0.000732	1294.4	1224.2	1259.3	P	P	0.000244	0.000244	0.7	0.5	0.6	0.3	0.525	0.170783	I	I	I	I	4	0.1	-0.1	NC	NC	729.9	748.4	739.15	P	P
254432_at	AT4G20830	12	4	4	4		NC	NC	D	NC	NC		NC	NC	254432_at	1644.1	1924.1	1784.1	P	P	0.000244	0.000244	1125.6	1751.8	1438.7	P	P	0.000732	0.000244	-0.3	-0.2	-0.3	-0.1	-0.225	0.0957427	D	NC	NC	NC	1	-0.1	0.2	NC	NC	1899.9	1998.6	1949.25	P	P
254444_at	AT4G20960	12	4	4	4			NC	I	NC	NC	NC	NC	NC	254444_at	1100.1	1141.3	1120.7	P	P	0.00415	0.001221	1696.3	1199.6	1447.95	P	P	0.001221	0.001221	0.5	0.4	0.2	-0.1	0.25	0.264575	I	I	NC	NC	2	0.2	-0.5	NC	D	1251.3	1178.7	1215	P	P
254451_at	AT4G21090	9	2	3	4		NC	NC	I	NC	NC	NC	NC	NC	254451_at	297.7	369.2	333.45	M	M	0.056152	0.056152	519.9	335.5	427.7	P	P	0.023926	0.01416	0.1	0.1	-0.1	0	0.025	0.0957427	I	I	NC	NC	2	0	-0.3	NC	NC	184	211	197.5	P	A
254416_at	AT4G21380	3	0	1	2	NC	NC	NC	NC	NC	NC	I	NC	NC	254416_at	190	194	192	A	A	0.111572	0.149658	258.8	177.5	218.15	A	A	0.067627	0.171387	0.5	0.5	-0.4	-0.5	0.025	0.55	NC	NC	NC	NC	4	0	-0.8	NC	NC	179.9	194.9	187.4	P	A
254412_at	AT4G21430	12	4	4	4		NC	NC	I	NC	NC	NC	NC	NC	254412_at	240.6	328.8	284.7	P	P	0.001953	0.010742	512.6	464.2	488.4	P	P	0.00415	0.00293	0.8	0.6	0.8	0.4	0.65	0.191485	NC	I	NC	MI	2	0.6	0	NC	NC	311.3	191.5	251.4	P	P
254392_at	AT4G21600	12	4	4	4	NC	NC	NC		NC	NC	I	NC	NC	254392_at	863.7	863.9	863.8	P	P	0.000732	0.000732	933.8	911.7	922.75	P	P	0.000732	0.000244	0	0	0.1	0.2	0.075	0.0957427	NC	NC	NC	NC	4	-0.1	0.2	NC	NC	988.2	847	917.6	P	P
254387_at	AT4G21850	12	4	4	4	D		NC	D	NC	NC			NC	254387_at	4682.4	5003.2	4842.8	P	P	0.000244	0.000244	2244.1	3395	2819.55	P	P	0.000244	0.000244	-1	-1	-0.6	-0.6	-0.8	0.23094	D	D	D	D	4	0.1	0.4	NC	I	4131	5548.7	4839.85	P	P
254384_at	AT4G21870	12	4	4	4			NC		NC		D	NC	NC	254384_at	5500	5187.1	5343.55	P	P	0.000244	0.000244	4992.8	3589.7	4291.25	P	P	0.000244	0.000244	-0.1	0	-0.7	-0.4	-0.3	0.316228	NC	NC	D	D	2	-0.2	-0.5	NC	D	5470.6	3874.6	4672.6	P	P
254363_at	AT4G22010	12	4	4	4	NC	NC	NC		NC	NC	D	NC	NC	254363_at	1518.9	1619.9	1569.4	P	P	0.000244	0.000244	1657.2	1585.5	1621.35	P	P	0.000244	0.000244	0.2	0.2	0.1	0.2	0.175	0.05	NC	NC	NC	NC	4	0	-0.2	NC	NC	1478.8	1400.6	1439.7	P	P
254305_at	AT4G22200	12	4	4	4	I	NC	NC	I	NC	NC		NC	NC	254305_at	313	477.4	395.2	P	P	0.001953	0.001953	779.6	691.7	735.65	P	P	0.001221	0.000732	1.1	0.7	0.9	0.6	0.825	0.221736	I	I	I	I	4	0.4	-0.2	NC	NC	473.2	436.5	454.85	P	P
254361_at	AT4G22212	12	4	4	4			NC	D	NC	NC	I	NC	NC	254361_at	3973.7	4157	4065.35	P	P	0.000244	0.000244	2336.1	3536.4	2936.25	P	P	0.000244	0.000732	-0.8	-0.8	-0.3	-0.3	-0.55	0.288675	D	D	MD	D	3	0.1	0.5	NC	I	4420.1	4427.4	4423.75	P	P
254327_at	AT4G22490	12	4	4	4			NC				D	NC	NC	254327_at	927.4	1002.2	964.8	P	P	0.000244	0.000244	1645.6	1090	1367.8	P	P	0.000244	0.000244	0.9	0.9	0.2	0.2	0.55	0.404145	I	I	NC	NC	2	0.1	-0.7	NC	D	1402.2	726.8	1064.5	P	P
254319_at	AT4G22560	12	4	4	4	I	NC	NC	NC	NC	NC	NC	NC	NC	254319_at	324.1	418.4	371.25	P	P	0.030273	0.01416	574.4	500	537.2	P	P	0.023926	0.001221	0.6	0.6	0.5	0.4	0.525	0.0957427	I	I	I	I	4	0.1	-0.4	NC	NC	396.9	466.7	431.8	P	P
254298_at	AT4G22890	12	4	4	4		NC	NC	I	NC	NC		NC	NC	254298_at	10843.1	12559	11701	P	P	0.000244	0.000244	15960.3	13653.4	14806.9	P	P	0.000244	0.000244	0.6	0.4	0.3	0.1	0.35	0.208167	I	I	I	NC	3	0.1	-0.3	NC	NC	11206.3	11397	11301.6	P	P
254291_at	AT4G23010	12	4	4	4		NC	NC	D	NC	NC	I	NC	NC	254291_at	4873.6	4835	4854.3	P	P	0.000244	0.000244	3552.9	4129.9	3841.4	P	P	0.000244	0.000244	-0.4	-0.5	-0.3	-0.3	-0.375	0.0957427	D	D	NC	NC	2	0	0.2	NC	NC	5056.6	5055	5055.8	P	P
254241_at	AT4G23190	12	4	4	4		NC	NC			NC	I	NC	NC	254241_at	246.5	194.3	220.4	P	P	0.001221	0.000244	116.3	169.8	143.05	P	P	0.00415	0.00293	-0.6	-0.5	-0.7	-0.7	-0.625	0.0957427	MD	NC	NC	D	1	-0.2	0.1	NC	NC	151.7	188.8	170.25	P	P
254215_at	AT4G23700	8	2	3	3		NC				NC	I	NC	NC	254215_at	208	337.2	272.6	A	P	0.111572	0.037598	310.7	219.8	265.25	P	A	0.030273	0.067627	0.6	-0.1	-0.1	-0.9	-0.125	0.613052	I	NC	NC	NC	1	0.7	-0.7	I	NC	277.5	224.6	251.05	P	M
254216_at	AT4G23710	12	4	4	4	NC		NC	D	NC	NC		NC	NC	254216_at	1630.3	1718.4	1674.35	P	P	0.000244	0.000244	1614.5	1990.7	1802.6	P	P	0.000244	0.000244	-0.2	-0.1	0.2	0.3	0.05	0.238048	NC	NC	NC	NC	4	-0.1	0.4	NC	I	2153	2139.6	2146.3	P	P
254218_at	AT4G23740	12	4	4	4	I	NC	NC		NC	NC	NC	NC	NC	254218_at	572.1	548.7	560.4	P	P	0.000732	0.000732	842.2	999.4	920.8	P	P	0.001221	0.000244	0.6	0.5	0.6	0.6	0.575	0.05	I	I	I	I	4	0	0.1	NC	NC	622	596.9	609.45	P	P
254233_at	AT4G23800	12	4	4	4		NC	NC	I	NC	NC		NC	NC	254233_at	612.8	812.9	712.85	P	P	0.00293	0.001221	1254.1	1029.6	1141.85	P	P	0.000732	0.000732	1	0.7	0.6	0.3	0.65	0.288675	I	I	I	NC	3	0.3	-0.3	NC	NC	687.9	559.2	623.55	P	P
254181_at	AT4G23940	12	4	4	4		NC	NC	I	NC	NC		NC	NC	254181_at	523.2	750.6	636.9	P	P	0.005859	0.008057	765.9	788.1	777	P	P	0.00293	0.001953	0.5	0.4	0.4	0.3	0.4	0.0816497	NC	NC	I	NC	3	0.1	-0.1	NC	NC	560.6	660.5	610.55	P	P
254194_at	AT4G23980	12	4	4	4	NC	NC	NC	I	NC	NC	NC	NC	NC	254194_at	277	351.6	314.3	P	P	0.00293	0.000244	477.3	435.5	456.4	P	P	0.001221	0.000244	0.5	0.6	0.1	0.3	0.375	0.221736	NC	NC	NC	NC	4	-0.1	-0.3	NC	NC	309	330.6	319.8	P	P
254189_at	AT4G24000	12	4	4	4		NC	NC	D	NC	NC	I		NC	254189_at	712.7	544.2	628.45	P	P	0.000244	0.000244	411.4	369.2	390.3	P	P	0.000244	0.000244	-0.6	-0.4	-0.7	-0.3	-0.5	0.182574	D	NC	D	NC	2	-0.3	0	NC	NC	793.5	928.1	860.8	P	P
254160_at	AT4G24210	12	4	4	4		NC	NC	D	NC	NC		NC	NC	254160_at	1245.8	1109.3	1177.55	P	P	0.001953	0.001953	1211.7	1032.6	1122.15	P	P	0.005859	0.001953	-0.3	-0.1	-0.3	-0.1	-0.2	0.11547	D	NC	NC	NC	1	-0.4	0.1	NC	NC	1256.7	1164.8	1210.75	P	P
254157_at	AT4G24220;AT4G24230	12	4	4	4			NC	D	NC	NC		NC	NC	254157_at	8082.3	6684.8	7383.55	P	P	0.000244	0.000244	4954.2	6153.1	5553.65	P	P	0.000244	0.000244	-0.5	-0.5	-0.3	-0.2	-0.375	0.15	D	D	NC	NC	2	-0.1	0.2	NC	I	6696	7067.4	6881.7	P	P
254148_at	AT4G24280	12	4	4	4		NC	NC	I	NC	NC	NC	NC	NC	254148_at	5874.8	6478.1	6176.45	P	P	0.000732	0.001221	6985.4	6495.5	6740.45	P	P	0.000732	0.000732	0.2	0.2	0.1	0	0.125	0.0957427	I	NC	NC	NC	1	0.1	-0.2	NC	NC	5404.7	6298.7	5851.7	P	P
254161_at	AT4G24370	12	4	4	4	NC	NC	NC	D	NC	NC	NC	NC	NC	254161_at	522.5	545	533.75	P	P	0.000244	0.000244	434.3	594.9	514.6	P	P	0.000244	0.000732	-0.3	-0.2	-0.2	0.2	-0.125	0.221736	NC	NC	NC	NC	4	-0.4	0.3	NC	NC	566.9	509.7	538.3	P	P
254162_at	AT4G24440	12	4	4	4	NC		NC	D	NC	NC	NC	NC	NC	254162_at	2539.3	2452.5	2495.9	P	P	0.000244	0.000244	2048.2	2354.1	2201.15	P	P	0.000244	0.000244	-0.3	-0.1	0	0.1	-0.075	0.170783	NC	NC	NC	NC	4	-0.3	0.2	NC	I	2507.7	2393.1	2450.4	P	P
254122_at	AT4G24510	12	4	4	4		NC	NC	NC	NC	NC	D	NC	NC	254122_at	754.6	900.8	827.7	P	P	0.000244	0.000244	963.2	1069.1	1016.15	P	P	0.000244	0.000244	0.3	0.2	0.4	0.4	0.325	0.0957427	NC	NC	I	NC	3	0.1	0.3	NC	NC	875.7	998.8	937.25	P	P
254120_at	AT4G24570	12	4	4	4	D	NC	NC	D	NC	NC	NC	NC	NC	254120_at	800.6	835.8	818.2	P	P	0.001221	0.00415	303.6	275.3	289.45	P	P	0.010742	0.010742	-1.1	-0.9	-1	-0.9	-0.975	0.0957427	D	D	D	D	4	-0.1	0	NC	NC	694.9	737.6	716.25	P	P
254117_at	AT4G24750	12	4	4	4		NC	NC	I	NC	NC		NC	NC	254117_at	2741.8	2990.1	2865.95	P	P	0.000244	0.000732	3659.6	3583.7	3621.65	P	P	0.000244	0.000244	0.4	0.3	0.3	0	0.25	0.173205	I	I	I	NC	3	0.2	-0.2	NC	NC	3078.2	3062.2	3070.2	P	P
254126_at	AT4G24770	12	4	4	4	NC	NC	NC			NC	D	NC	NC	254126_at	11116.1	9812.4	10464.2	P	P	0.000244	0.000244	8760.6	9254.3	9007.45	P	P	0.000244	0.000244	-0.1	0	-0.2	-0.1	-0.1	0.0816497	NC	NC	NC	NC	4	-0.1	0	NC	NC	10073.6	10835.8	10454.7	P	P
254103_at	AT4G25030	12	4	4	4			NC	D	NC	NC	NC	NC	NC	254103_at	5881.1	6065.3	5973.2	P	P	0.000244	0.000732	4737.4	5210.8	4974.1	P	P	0.000732	0.000244	-0.6	-0.4	-0.3	-0.1	-0.35	0.208167	D	D	MD	NC	2	-0.2	0.2	NC	I	6616.2	5716	6166.1	P	P
254102_at	AT4G25050	12	4	4	4	NC	NC	NC			NC	D	NC	NC	254102_at	14345.6	12809.6	13577.6	P	P	0.000244	0.000244	13971.2	14595.2	14283.2	P	P	0.000244	0.000244	0	0.1	-0.1	0.1	0.025	0.0957427	NC	NC	NC	NC	4	-0.1	-0.1	NC	NC	16575.9	15752.9	16164.4	P	P
254105_at	AT4G25080	12	4	4	4		NC	NC		NC	NC	D	NC	NC	254105_at	7988.3	8582	8285.15	P	P	0.000244	0.000244	9840.7	8045.4	8943.05	P	P	0.000244	0.000244	0.3	0.2	0.1	0.1	0.175	0.0957427	I	NC	NC	NC	1	0	-0.2	NC	NC	7695.9	8400.6	8048.25	P	P
254093_at	AT4G25110	10	4	4	2	NC	NC	NC	D	NC	NC		NC	NC	254093_at	352.5	361.1	356.8	P	P	0.030273	0.01416	282.7	264.6	273.65	P	P	0.046143	0.008057	-0.1	-0.4	-0.4	-0.4	-0.325	0.15	NC	NC	NC	NC	4	0	0.4	NC	NC	372.9	482.6	427.75	P	P
254057_at	AT4G25170	12	4	4	4			NC	I	NC	NC	NC	NC	NC	254057_at	695.3	687.7	691.5	P	P	0.000244	0.000244	958.1	753.1	855.6	P	P	0.000244	0.000244	0.5	0.5	0.1	0.1	0.3	0.23094	I	I	NC	NC	2	0	-0.5	NC	D	699.9	580.1	640	P	P
254076_at	AT4G25340	12	4	4	4		NC	NC	I	NC	NC		NC	NC	254076_at	930.2	865	897.6	P	P	0.000732	0.000244	1368.2	1019.4	1193.8	P	P	0.000732	0.000732	0.6	0.4	0.2	0.1	0.325	0.221736	I	I	NC	NC	2	0.1	-0.4	NC	NC	751.7	729.6	740.65	P	P
254080_at	AT4G25630	12	4	4	4	NC	NC	NC				D	NC	NC	254080_at	4226.1	4399.9	4313	P	P	0.000244	0.000244	4987.4	4954.4	4970.9	P	P	0.000244	0.000732	0.3	0.1	0.2	0.1	0.175	0.0957427	NC	NC	NC	NC	4	0.1	-0.1	NC	NC	3712.6	5019.9	4366.25	P	P
254025_at	AT4G25790	12	4	4	4			NC	D	NC	NC	NC	NC	NC	254025_at	514.8	542.5	528.65	P	P	0.000244	0.00293	441.8	401.2	421.5	P	P	0.030273	0.000732	-1.1	-1.2	-0.4	-0.4	-0.775	0.434933	D	D	MD	NC	2	-0.1	0.3	NC	I	445	534.3	489.65	P	P
254044_at	AT4G25820	12	4	4	4	D		NC	D	NC	NC		NC	NC	254044_at	1852.1	1884.9	1868.5	P	P	0.000732	0.000244	659.8	1240	949.9	P	P	0.000732	0.000244	-1.3	-1.3	-0.5	-0.6	-0.925	0.434933	D	D	D	D	4	-0.1	0.8	NC	I	1645.1	1683.9	1664.5	P	P
254041_at	AT4G25830	12	4	4	4	NC	NC	NC	NC	NC	NC	D	NC	NC	254041_at	548.6	449.4	499	P	P	0.000732	0.000732	545.3	435.5	490.4	P	P	0.000244	0.000244	-0.2	0	0	0	-0.05	0.1	NC	NC	NC	NC	4	-0.1	0	NC	NC	505	650.2	577.6	P	P
254045_at	AT4G25880	12	4	4	4		NC	NC	I	NC	NC	NC	NC	NC	254045_at	987.4	1138.8	1063.1	P	P	0.000244	0.000244	1927.1	1535.1	1731.1	P	P	0.000244	0.000244	0.8	0.5	0.5	0.2	0.5	0.244949	I	I	I	NC	3	0.3	-0.3	NC	NC	1059.7	1246.9	1153.3	P	P
254034_at	AT4G25960	12	4	4	4	NC	NC	NC		NC	NC	D	NC	NC	254034_at	1113.7	1179.2	1146.45	P	P	0.001221	0.001221	1707.7	1662.5	1685.1	P	P	0.001221	0.001221	0.3	0.3	0.4	0.2	0.3	0.0816497	NC	NC	NC	NC	4	0.1	0	NC	NC	1158.5	1512.6	1335.55	P	P
254043_at	AT4G25990	11	4	3	4		NC	NC	I		NC	D	NC	NC	254043_at	261.4	233.3	247.35	P	P	0.023926	0.046143	278.3	312.6	295.45	P	P	0.01416	0.005859	0.2	0.2	0.3	0.3	0.25	0.057735	NC	I	NC	NC	3	0	0.1	NC	NC	213.3	185	199.15	P	A
253998_at	AT4G26010	12	4	4	4			NC	D	NC	NC		NC	NC	253998_at	1914.1	1780.9	1847.5	P	P	0.000244	0.000244	927.5	1646.9	1287.2	P	P	0.000244	0.000244	-0.9	-1	-0.3	-0.3	-0.625	0.377492	D	D	NC	NC	2	0	0.6	NC	I	2030.6	1779.6	1905.1	P	P
253994_at	AT4G26080	12	4	4	4	NC	NC	NC	NC	NC	NC	I	NC	NC	253994_at	1499.2	1641.1	1570.15	P	P	0.000732	0.000244	1472.7	1280.9	1376.8	P	P	0.000244	0.000244	0	-0.1	-0.2	-0.4	-0.175	0.170783	NC	NC	NC	NC	4	0.2	-0.1	NC	NC	1543.1	1671.3	1607.2	P	P
253996_at	AT4G26110	12	4	4	4	I	NC	NC	I	NC	NC	NC	NC	NC	253996_at	1132.2	1242.4	1187.3	P	P	0.000244	0.000732	1734.6	1612.8	1673.7	P	P	0.000244	0.000732	0.7	0.3	0.6	0.3	0.475	0.206155	I	I	I	I	4	0.4	0	NC	NC	1166.7	1257.7	1212.2	P	P
254019_at	AT4G26190	11	3	4	4	NC	NC	NC	I	NC	NC	NC	NC	NC	254019_at	193	157.1	175.05	A	P	0.067627	0.018555	218.6	222.7	220.65	P	P	0.010742	0.005859	0.4	0.2	0.7	0.5	0.45	0.208167	NC	NC	NC	NC	4	0.3	0.3	NC	NC	161.2	246.1	203.65	P	P
253999_at	AT4G26200	11	4	4	3		NC	NC	D	NC	NC		NC	NC	253999_at	533.6	597.9	565.75	P	P	0.00293	0.005859	315.6	366.6	341.1	P	P	0.046143	0.005859	-0.3	-0.7	-0.4	-0.5	-0.475	0.170783	NC	NC	NC	MD	3	0.1	-0.1	NC	NC	413.5	678	545.75	P	P
253985_at	AT4G26220	4	2	2	0	D	NC	NC	D	NC	NC	NC	NC	NC	253985_at	451.1	349	400.05	P	P	0.023926	0.037598	255.1	241.4	248.25	A	A	0.171387	0.067627	-0.8	-0.8	-0.6	-0.6	-0.7	0.11547	D	D	D	D	4	-0.2	0.4	NC	NC	348.9	427.8	388.35	P	P
253957_at	AT4G26320	12	4	4	4		NC	NC	D	NC	NC	NC	NC		253957_at	1035	1145.9	1090.45	P	P	0.000488	0.002441	652.2	870.7	761.45	P	P	0.005859	0.001465	-0.5	-0.5	-0.2	-0.3	-0.375	0.15	D	D	NC	NC	2	0	0.4	NC	NC	923.1	809.9	866.5	P	P
253962_at	AT4G26460	11	4	4	3		NC	NC	D	NC	NC	NC	NC	NC	253962_at	422.7	204.1	313.4	P	P	0.001953	0.005859	92.8	137.3	115.05	P	P	0.008057	0.010742	-0.8	-0.7	-0.9	-0.4	-0.7	0.216025	D	NC	D	NC	2	-0.5	0.6	NC	NC	180.1	276.2	228.15	P	P
253973_at	AT4G26555	12	4	4	4		NC	NC	I	NC	NC		NC	NC	253973_at	1149.2	1278.1	1213.65	P	P	0.00293	0.001221	1239.7	1514.6	1377.15	P	P	0.000244	0.000732	0.3	0.3	0.2	0.1	0.225	0.0957427	I	NC	NC	NC	1	0.1	-0.2	NC	NC	1196.8	1306	1251.4	P	P
253975_at	AT4G26600	12	4	4	4		NC	NC	I	NC	NC	NC	NC	NC	253975_at	318.3	278.1	298.2	P	P	0.000732	0.000732	340.6	402.6	371.6	P	P	0.000732	0.000244	0.2	0.4	0.3	0.5	0.35	0.129099	NC	NC	NC	I	3	-0.2	-0.1	NC	NC	327.7	322.6	325.15	P	P
253977_at	AT4G26630	12	4	4	4	NC	NC	NC	I	NC	NC	NC	NC	NC	253977_at	1273.2	1235.8	1254.5	P	P	0.000244	0.000244	1515.1	1543.2	1529.15	P	P	0.000244	0.000244	0.1	0.1	0.3	0.4	0.225	0.15	NC	NC	NC	NC	4	0	0.2	NC	NC	1309.1	1282.2	1295.65	P	P
253956_at	AT4G26700	12	4	4	4	NC	NC	NC	I	NC	NC	NC	NC	NC	253956_at	590.6	623.8	607.2	P	P	0.000244	0.000244	756.7	696.4	726.55	P	P	0.000244	0.000244	0.2	0.2	0.1	0	0.125	0.0957427	NC	NC	NC	NC	4	0.2	-0.2	NC	NC	636.4	721.3	678.85	P	P
253947_at	AT4G26760	12	4	4	4	NC	NC	NC	I	NC	NC	NC	NC	NC	253947_at	490.9	507.5	499.2	P	P	0.001221	0.000244	819	614.9	716.95	P	P	0.00293	0.000244	0.5	0.2	0.3	0.1	0.275	0.170783	NC	NC	NC	NC	4	0.1	-0.3	NC	NC	418.2	396.7	407.45	P	P
253921_at	AT4G26900	12	4	4	4	NC	NC	NC	I	NC	NC	NC	NC	NC	253921_at	1091.9	1188	1139.95	P	P	0.001221	0.001221	1222.4	1082.8	1152.6	P	P	0.000732	0.000244	0.2	0	0.1	0	0.075	0.0957427	NC	NC	NC	NC	4	0.1	0	NC	NC	829.2	1073	951.1	P	P
253940_at	AT4G26950	11	3	4	4		NC	NC	D	NC	NC	NC	NC	NC	253940_at	228.7	156.9	192.8	P	P	0.01416	0.00415	143.2	70.7	106.95	A	P	0.129639	0.046143	-0.2	-0.5	-0.5	-0.3	-0.375	0.15	NC	NC	MD	NC	3	-0.2	-0.4	NC	NC	204.9	195.8	200.35	P	P
253942_at	AT4G27010	12	4	4	4		NC		I	NC	NC	NC	NC	NC	253942_at	535.3	724.9	630.1	P	P	0.010742	0.005859	863.6	601	732.3	P	P	0.008057	0.00415	0.8	0.3	0.2	-0.2	0.275	0.411299	I	NC	NC	NC	1	0.5	-0.3	I	NC	485.4	465.6	475.5	P	P
253909_at	AT4G27270	12	4	4	4		NC	NC	D	NC	NC	NC	NC	NC	253909_at	863.5	856.6	860.05	P	P	0.000244	0.000732	447.3	545.4	496.35	P	P	0.001953	0.000244	-0.7	-0.3	-0.5	-0.3	-0.45	0.191485	D	MD	NC	NC	1	-0.1	0.2	NC	NC	848.2	707	777.6	P	P
253915_at	AT4G27280	12	4	4	4	D	NC	NC	D	NC	NC			NC	253915_at	2261.3	2790.3	2525.8	P	P	0.000244	0.000244	989.8	1140.1	1064.95	P	P	0.001221	0.000244	-1.2	-1.4	-1.2	-1.3	-1.275	0.0957427	D	D	D	D	4	0.1	0.1	NC	NC	2611.9	2725.9	2668.9	P	P
253912_at	AT4G27340	12	4	4	4		NC	NC	I	NC	NC	NC	NC	NC	253912_at	498.9	586.8	542.85	P	P	0.000732	0.000732	773.6	868.7	821.15	P	P	0.000244	0.000244	0.6	0.3	0.2	0.2	0.325	0.189297	I	I	NC	NC	2	0.3	-0.2	NC	NC	501.7	418.4	460.05	P	P
253876_at	AT4G27430	12	4	4	4		NC	NC	I	NC	NC	NC	NC	NC	253876_at	823.3	911.6	867.45	P	P	0.001221	0.001221	1328.1	1147.3	1237.7	P	P	0.000732	0.000732	0.4	0.2	0.3	0.1	0.25	0.129099	I	NC	I	NC	2	0.1	0	NC	NC	772.8	886.4	829.6	P	P
253858_at	AT4G27600	12	4	4	4	NC	NC	NC	I	NC	NC		NC	NC	253858_at	3066.8	3117	3091.9	P	P	0.000244	0.000244	3300.9	3251	3275.95	P	P	0.000244	0.000244	0.1	0.1	0.1	0.1	0.1	0	NC	NC	NC	NC	4	0	-0.1	NC	NC	3106.6	3048.9	3077.75	P	P
253860_at	AT4G27700	12	4	4	4	NC	NC	NC		NC	NC	D	NC	NC	253860_at	3152.6	3322	3237.3	P	P	0.000244	0.000244	4874.2	5239	5056.6	P	P	0.000244	0.000244	0.3	0.2	0.3	0.2	0.25	0.057735	NC	NC	NC	NC	4	0.1	0	NC	NC	3434.1	2982	3208.05	P	P
253891_at	AT4G27720	12	4	4	4	NC	NC	NC	NC	NC	NC	D	NC	NC	253891_at	1822.7	2026.3	1924.5	P	P	0.000732	0.000732	2016.1	2106.8	2061.45	P	P	0.000732	0.000732	0.1	0	0	-0.1	0	0.0816497	NC	NC	NC	NC	4	0.2	0	NC	NC	1769.1	2011.2	1890.15	P	P
253835_at	AT4G27820	12	4	4	4	NC	NC	NC	I	NC	NC	NC	NC	NC	253835_at	838.2	1023.5	930.85	P	P	0.00293	0.000732	1070.3	887.6	978.95	P	P	0.00293	0.001953	0.3	0	0.1	0.1	0.125	0.125831	NC	NC	NC	NC	4	0.2	0	NC	NC	1187.4	787	987.2	P	P
253829_at	AT4G28040	12	4	4	4		NC	NC	D	NC	NC		NC	NC	253829_at	2087.3	1848.1	1967.7	P	P	0.000244	0.000732	1382.8	1180.1	1281.45	P	P	0.00293	0.000732	-0.8	-0.5	-0.7	-0.6	-0.65	0.129099	D	D	D	NC	3	-0.2	0	NC	NC	2052	1696.6	1874.3	P	P
253849_at	AT4G28080	12	4	4	4		NC	NC	I	NC	NC	NC	NC	NC	253849_at	4259.4	5253.7	4756.55	P	P	0.000244	0.000244	5561.1	5123.9	5342.5	P	P	0.000244	0.000244	0.3	0.1	0.2	0	0.15	0.129099	I	NC	NC	NC	1	0.2	-0.1	NC	NC	4957.5	4509	4733.25	P	P
253811_at	AT4G28190	12	4	4	4	NC	NC	NC	NC	NC	NC	D	NC	NC	253811_at	400.6	380	390.3	P	P	0.00293	0.005859	579.2	462.7	520.95	P	P	0.030273	0.005859	0.3	0.3	0.1	0.2	0.225	0.0957427	NC	NC	NC	NC	4	-0.2	-0.2	NC	NC	380.1	414.8	397.45	P	P
253814_at	AT4G28290	12	4	4	4	D	NC	NC	D	NC	NC	D	NC	NC	253814_at	995.1	980.9	988	P	P	0.000732	0.001953	825.5	483.3	654.4	P	P	0.005859	0.000244	-0.5	-0.5	-0.8	-1	-0.7	0.244949	D	D	D	D	4	0	-0.5	NC	NC	1047.7	990.6	1019.15	P	P
253817_at	AT4G28310	12	4	4	4	I	NC	NC	I	NC	NC		NC	NC	253817_at	723	696.8	709.9	P	P	0.00415	0.00415	1293.3	1458.3	1375.8	P	P	0.000732	0.000732	0.8	0.8	0.8	0.9	0.825	0.05	I	I	I	I	4	0.1	-0.1	NC	NC	848.9	686.3	767.6	P	P
253773_s_at	AT4G28360	12	4	4	4	NC	NC	NC	I	NC	NC		NC	NC	253773_s_at	1636.4	1943.9	1790.15	P	P	0.000244	0.000244	1923.5	2173.2	2048.35	P	P	0.000244	0.000244	0.2	0	0.2	0.2	0.15	0.1	NC	NC	NC	NC	4	0.2	0	NC	NC	1751.2	1729.4	1740.3	P	P
253779_at	AT4G28490	12	4	4	4		NC	NC		NC	NC	I	NC	NC	253779_at	551.6	516.7	534.15	P	P	0.001221	0.000732	649.9	649.5	649.7	P	P	0.000732	0.000732	0.2	0.4	0.3	0.5	0.35	0.129099	NC	NC	I	I	2	-0.1	0.1	NC	NC	501.9	563.8	532.85	P	P
253789_at	AT4G28570	12	4	4	4	NC	NC	NC	NC	NC	NC	I	NC	NC	253789_at	548.4	572.6	560.5	P	P	0.001953	0.000732	578.7	567.4	573.05	P	P	0.001953	0.000244	-0.1	-0.1	0	0	-0.05	0.057735	NC	NC	NC	NC	4	0.1	0	NC	NC	507	521.1	514.05	P	P
253739_at	AT4G28770;AT4G28760	12	4	4	4		NC	NC	I	NC	NC	NC	NC	NC	253739_at	871.7	731.3	801.5	P	P	0.000244	0.000244	1167.8	845.5	1006.65	P	P	0.000244	0.000244	0.4	0.3	0.2	0	0.225	0.170783	MI	I	NC	NC	1	0	-0.3	NC	NC	733.8	739.9	736.85	P	P
253736_at	AT4G28780	12	4	4	4	I	NC	NC			NC		NC	NC	253736_at	519	574.8	546.9	P	P	0.000732	0.00415	772.6	938.8	855.7	P	P	0.000244	0.000244	0.7	0.7	0.8	0.5	0.675	0.125831	I	I	I	I	4	0.2	0.1	NC	NC	687.4	764.6	726	P	P
253753_at	AT4G29030	8	2	2	4	I	NC	NC	I	NC	NC	D		NC	253753_at	218.3	348.9	283.6	A	A	0.567627	0.334473	1594.3	1172.9	1383.6	P	P	0.018555	0.01416	2.5	1.8	2.5	1.5	2.075	0.5058	I	I	I	I	4	0.7	-0.3	NC	NC	371.6	409.9	390.75	A	A
253722_at	AT4G29190	12	4	4	4	D	NC	NC	D	NC	NC		NC	NC	253722_at	2436.8	1979.6	2208.2	P	P	0.000244	0.000244	1659.3	1396.2	1527.75	P	P	0.000244	0.000244	-0.4	-0.4	-0.6	-0.5	-0.475	0.0957427	D	D	D	D	4	-0.2	-0.2	NC	NC	2145.5	2158.4	2151.95	P	P
253720_at	AT4G29270	12	4	4	4		NC				NC	I	NC	NC	253720_at	1058.7	1335	1196.85	P	P	0.00293	0.001953	1562.3	1150.5	1356.4	P	P	0.010742	0.001953	-0.1	-0.4	0.2	-0.2	-0.125	0.25	NC	D	NC	NC	3	0.3	0.2	I	NC	1160.3	1067	1113.65	P	P
253727_at	AT4G29350	12	4	4	4		NC	NC	D	NC	NC	NC	NC	NC	253727_at	19247.6	17906.8	18577.2	P	P	0.000244	0.000244	15451.1	16719	16085	P	P	0.000244	0.000244	-0.3	-0.2	-0.1	-0.1	-0.175	0.0957427	D	MD	NC	NC	1	-0.1	0.1	NC	NC	20291.5	20167.1	20229.3	P	P
253694_at	AT4G29735	12	4	4	4			NC	D	NC	NC	NC	NC	NC	253694_at	7145.7	6950	7047.85	P	P	0.000244	0.000244	4713.8	5028.9	4871.35	P	P	0.000244	0.000244	-0.5	-0.4	-0.3	-0.1	-0.325	0.170783	D	D	NC	NC	2	-0.1	0.2	NC	I	6378	5873.5	6125.75	P	P
253686_at	AT4G29750	12	4	4	4	NC	NC	NC	I	NC	NC	NC	NC	NC	253686_at	417.1	544.5	480.8	P	P	0.000244	0.000244	690.6	596.2	643.4	P	P	0.000244	0.000732	0.5	0.2	0	-0.1	0.15	0.264575	NC	NC	NC	NC	4	0.3	-0.4	NC	NC	505.3	444.1	474.7	P	P
253670_at	AT4G30010	12	4	4	4		NC		D	NC	NC	NC	NC	NC	253670_at	12438.1	10558.7	11498.4	P	P	0.000244	0.000244	9243.2	11423.5	10333.4	P	P	0.000244	0.000244	-0.5	-0.2	-0.2	0	-0.225	0.206155	D	D	NC	NC	2	-0.2	0.2	D	NC	13174.5	13325.1	13249.8	P	P
253650_at	AT4G30020	12	4	4	4	I	NC	NC		NC	NC			NC	253650_at	2101.1	1938.8	2019.95	P	P	0.008057	0.010742	2499.5	2931.6	2715.55	P	P	0.00415	0.00293	0.4	0.4	0.4	0.4	0.4	0	I	I	I	I	4	0.1	0	NC	NC	1689.2	1754.9	1722.05	P	P
253660_at	AT4G30140	12	4	4	4	I	NC	NC	I	NC	NC	D	NC	NC	253660_at	977.9	538.2	758.05	P	P	0.010742	0.00415	968	1205.2	1086.6	P	P	0.00415	0.000732	0.5	0.8	0.4	0.8	0.625	0.206155	I	I	I	I	4	-0.4	0.2	NC	NC	613.1	754.6	683.85	P	P
253667_at	AT4G30170	12	4	4	4			NC		NC	NC	I	NC	NC	253667_at	7323.9	6662.4	6993.15	P	P	0.000244	0.000244	5121.5	6364.9	5743.2	P	P	0.000244	0.000244	-0.5	-0.5	-0.2	-0.1	-0.325	0.206155	D	D	NC	NC	2	-0.1	0.3	NC	I	6755.7	6459.6	6607.65	P	P
253610_at	AT4G30200	12	4	4	4		NC		I	NC	NC	NC	NC	NC	253610_at	1539.1	1851.8	1695.45	P	P	0.000244	0.000244	2153.1	1947.6	2050.35	P	P	0.000244	0.000244	0.5	0.3	0.3	0.1	0.3	0.163299	I	I	I	NC	3	0.2	-0.2	I	NC	1611.1	1501.6	1556.35	P	P
253629_at	AT4G30450	12	4	4	4			NC	D	NC	NC	I	NC	NC	253629_at	2450.2	2386.4	2418.3	P	P	0.001953	0.001221	2073.7	2163.6	2118.65	P	P	0.00293	0.000732	-0.5	-0.4	-0.2	-0.2	-0.325	0.15	D	D	NC	NC	2	-0.1	0.2	NC	I	2300.1	2336.3	2318.2	P	P
253579_at	AT4G30610	12	4	4	4		NC	NC	I	NC	NC	D	NC	NC	253579_at	661.1	841.5	751.3	P	P	0.000244	0.000244	953.4	764.1	858.75	P	P	0.000732	0.000244	0.6	0.2	0.4	0	0.3	0.258199	I	NC	NC	NC	1	0.3	-0.3	NC	NC	741.8	676.8	709.3	P	P
253627_at	AT4G30650	12	4	4	4			NC		NC	NC	D	NC	NC	253627_at	1633.8	1339	1486.4	P	P	0.000244	0.000244	973.4	1925	1449.2	P	P	0.000244	0.000244	-0.4	-0.3	0.2	0.5	1.38778e-17	0.424264	D	D	NC	I	2	-0.2	0.6	NC	I	1919.1	1336.1	1627.6	P	P
253581_at	AT4G30660	12	4	4	4			NC	D	NC	NC	NC	NC	NC	253581_at	2391.4	2388.7	2390.05	P	P	0.000244	0.000244	1867.6	2705.2	2286.4	P	P	0.000244	0.000244	-0.6	-0.5	0.2	0.2	-0.175	0.434933	D	D	NC	NC	2	-0.1	0.8	NC	I	2458.7	2426.1	2442.4	P	P
253582_at	AT4G30670	12	4	4	4			NC	D	NC	NC		NC	NC	253582_at	2068.3	2644.9	2356.6	P	P	0.000244	0.000244	1833.1	2755.1	2294.1	P	P	0.000732	0.000244	-0.4	-0.7	0.1	0	-0.25	0.369685	D	D	NC	NC	2	0.1	0.5	NC	I	2130.9	2141.2	2136.05	P	P
253585_at	AT4G30720	12	4	4	4		NC	NC	I	NC	NC		NC	NC	253585_at	380.5	443.3	411.9	P	P	0.000244	0.000244	718.1	682.3	700.2	P	P	0.000244	0.000244	0.5	0.6	0.4	0.1	0.4	0.216025	I	NC	I	NC	2	0.3	-0.3	NC	NC	509.6	492.8	501.2	P	P
253549_at	AT4G30930	12	4	4	4		NC		I	NC	NC	NC	NC	NC	253549_at	1102.7	1307	1204.85	P	P	0.000732	0.000732	1477.9	1378.6	1428.25	P	P	0.000244	0.000244	0.3	0.1	0.3	0.1	0.2	0.11547	I	NC	I	NC	2	0.3	-0.1	I	NC	954.7	1146.5	1050.6	P	P
253547_at	AT4G30950	12	4	4	4		NC	NC		NC	NC	D	NC	NC	253547_at	11663.2	12074.2	11868.7	P	P	0.000244	0.000244	14060.9	13288.5	13674.7	P	P	0.000244	0.000244	0.2	0.2	0.2	0.1	0.175	0.05	I	NC	NC	NC	1	0	-0.1	NC	NC	11512.1	12436.4	11974.2	P	P
253551_at	AT4G30996	12	4	4	4			NC	D	NC	NC	NC	NC	NC	253551_at	2700.5	2770.9	2735.7	P	P	0.000244	0.000244	2109.6	2705	2407.3	P	P	0.000244	0.000244	-0.3	-0.4	0	0	-0.175	0.206155	D	D	NC	NC	2	0.1	0.3	NC	I	2842.7	2924.5	2883.6	P	P
253546_at	AT4G31040	12	4	4	4	NC	NC	NC	I	NC	NC	NC	NC	NC	253546_at	1782.9	1902.8	1842.85	P	P	0.000244	0.000244	1992.3	1834.4	1913.35	P	P	0.000244	0.000244	0.1	0	0.1	0	0.05	0.057735	NC	NC	NC	NC	4	0.1	0	NC	NC	1797.4	1635.5	1716.45	P	P
253538_at	AT4G31460	12	4	4	4	NC	NC	NC	I	NC	NC	NC	NC	NC	253538_at	1329.9	1479.7	1404.8	P	P	0.000244	0.000244	1406	1395.4	1400.7	P	P	0.000244	0.000732	0.2	0.2	0.1	0.2	0.175	0.05	NC	NC	NC	NC	4	0	0	NC	NC	1193.3	1340.2	1266.75	P	P
253534_at	AT4G31500	12	4	4	4			NC	D		NC	I	NC	NC	253534_at	13008.5	10837	11922.8	P	P	0.000244	0.000244	7896.6	9343.1	8619.85	P	P	0.000244	0.000244	-0.8	-0.5	-0.5	-0.2	-0.5	0.244949	D	D	D	NC	3	-0.3	0.3	NC	I	10154.8	12454.4	11304.6	P	P
253489_at	AT4G31780	12	4	4	4		NC	NC	I	NC	NC	NC	NC	NC	253489_at	1717.7	1879.6	1798.65	P	P	0.000244	0.000244	2032.4	2288.3	2160.35	P	P	0.000244	0.000244	0.2	0.1	0.3	0.2	0.2	0.0816497	NC	NC	I	NC	3	0.2	0.2	NC	NC	1935.8	1655.8	1795.8	P	P
253485_at	AT4G31800	12	4	4	4	D	NC	NC	D	NC	NC		NC	NC	253485_at	899.7	689.1	794.4	P	P	0.000244	0.000244	619.9	605.7	612.8	P	P	0.001221	0.000244	-0.7	-0.9	-0.8	-0.7	-0.775	0.0957427	D	D	D	D	4	-0.3	0	NC	NC	776.3	817.8	797.05	P	P
253493_at	AT4G31820	12	4	4	4	I	NC	NC		NC	NC	NC	NC	NC	253493_at	594.4	632.5	613.45	P	P	0.018555	0.008057	1381.4	933.4	1157.4	P	P	0.00293	0.001953	1.2	0.7	0.9	0.5	0.825	0.298608	I	I	I	I	4	0.4	-0.3	NC	NC	692.6	554	623.3	P	P
253480_at	AT4G31840	12	4	4	4		NC	NC		NC	NC	D	NC	NC	253480_at	1583.9	1709.7	1646.8	P	P	0.000244	0.000244	1996.4	2049.8	2023.1	P	P	0.000244	0.000244	0.4	0.3	0.3	0.1	0.275	0.125831	I	NC	I	NC	2	0.2	-0.1	NC	NC	1753.6	1460.7	1607.15	P	P
253497_at	AT4G31880	12	4	4	4		NC	NC	I	NC	NC	NC	NC	NC	253497_at	552.4	569.8	561.1	P	P	0.000244	0.000732	800.6	645	722.8	P	P	0.000244	0.000244	0.5	0.5	0.3	0.3	0.4	0.11547	I	I	NC	NC	2	0.1	-0.1	NC	NC	536.8	591.6	564.2	P	P
253425_at	AT4G32190	12	4	4	4			NC	I	NC	NC	NC	NC	NC	253425_at	686.2	677.3	681.75	P	P	0.001221	0.000732	1023.7	575.1	799.4	P	P	0.000732	0.000244	0.8	0.5	0	-0.2	0.275	0.457347	I	I	NC	NC	2	0.3	-0.6	NC	D	735.5	687.2	711.35	P	P
253424_at	AT4G32330	12	4	4	4		NC	NC	I	NC	NC	NC	NC	NC	253424_at	986.6	1051.1	1018.85	P	P	0.000244	0.000244	1245.3	1120.5	1182.9	P	P	0.000244	0.000244	0.4	0.2	0.2	0.2	0.25	0.1	I	NC	NC	NC	1	0.1	-0.2	NC	NC	1069.4	992.8	1031.1	P	P
253429_at	AT4G32420	12	4	4	4		NC	NC	I	NC	NC	NC	NC	NC	253429_at	1099.4	1132.3	1115.85	P	P	0.001221	0.000244	1510	1325.7	1417.85	P	P	0.000244	0.000244	0.5	0.4	0.3	0.2	0.35	0.129099	I	I	NC	NC	2	-0.1	-0.2	NC	NC	1044.5	1308.6	1176.55	P	P
253436_at	AT4G32470	12	4	4	4		NC	NC	D	NC	NC	NC	NC	NC	253436_at	15988.9	13903	14946	P	P	0.000244	0.000244	11758.1	12729.8	12244	P	P	0.000244	0.000244	-0.5	-0.3	-0.2	-0.1	-0.275	0.170783	D	D	D	NC	3	-0.2	0.2	NC	NC	13257.3	15150	14203.6	P	P
253443_at	AT4G32551	12	4	4	4			NC	I	NC	NC	NC	NC	NC	253443_at	1182.1	1334.4	1258.25	P	P	0.000732	0.000732	2028.1	1650.9	1839.5	P	P	0.000732	0.001221	0.7	0.5	0.2	0	0.35	0.310913	I	I	NC	NC	2	0.2	-0.4	NC	D	1280.4	1145	1212.7	P	P
253440_at	AT4G32570	12	4	4	4	I	NC	NC	I	NC	NC	D		NC	253440_at	1004.8	1172.8	1088.8	P	P	0.000732	0.001221	1457.8	1420.2	1439	P	P	0.000244	0.000244	0.7	0.4	0.6	0.4	0.525	0.15	I	I	I	I	4	0.2	-0.2	NC	NC	929.8	935.5	932.65	P	P
253411_at	AT4G32980	12	4	4	4		NC	NC	I	NC	NC		NC	NC	253411_at	733.1	821.8	777.45	P	P	0.000244	0.000244	880	919.2	899.6	P	P	0.000244	0.000732	0.5	0.2	0.4	0	0.275	0.221736	I	NC	NC	NC	1	0.1	-0.2	NC	NC	747.6	700.1	723.85	P	P
253362_s_at	AT4G33120;AT4G33110	12	4	4	4		NC	NC	I	NC		D	NC	NC	253362_s_at	873.7	952.7	913.2	P	P	0.000244	0.000244	1287	1092.9	1189.95	P	P	0.000244	0.000244	0.5	0.4	0.1	0	0.25	0.238048	I	I	NC	NC	2	0.2	-0.3	NC	NC	1250.5	844.3	1047.4	P	P
253368_at	AT4G33200	12	4	4	4			NC	I	NC	NC		NC	NC	253368_at	576.8	590.7	583.75	P	P	0.000244	0.000244	786.2	484.5	635.35	P	P	0.000244	0.000244	0.6	0.5	0	0	0.275	0.320156	I	I	NC	NC	2	0	-0.6	NC	D	590.6	640.9	615.75	P	P
253372_at	AT4G33220	12	4	4	4	NC	NC	NC	NC	NC	NC	D	NC	NC	253372_at	2139.6	2017.1	2078.35	P	P	0.000244	0.000244	2206.1	2162.1	2184.1	P	P	0.000244	0.000244	0	0.1	-0.2	0	-0.025	0.125831	NC	NC	NC	NC	4	-0.1	-0.2	NC	NC	1952.9	2371.4	2162.15	P	P
253340_s_at	AT4G33270;AT4G33260	12	4	4	4		NC		I	NC	NC		NC	NC	253340_s_at	507.5	408.3	457.9	P	P	0.001953	0.000244	807.9	549.2	678.55	P	P	0.000732	0.000244	0.7	0.8	0.3	0.3	0.525	0.262996	I	NC	I	NC	2	0.1	-0.4	I	NC	506.7	581.5	544.1	P	P
253334_at	AT4G33360	12	4	4	4			NC	D	NC	NC	NC	NC	NC	253334_at	2494.3	2035	2264.65	P	P	0.000732	0.000732	1577.5	2242	1909.75	P	P	0.000732	0.000244	-0.5	-0.3	-0.2	0	-0.25	0.208167	D	D	NC	NC	2	-0.2	0.4	NC	I	2105	2381.6	2243.3	P	P
253337_at	AT4G33470	12	4	4	4	NC	NC	NC	I	NC	NC	NC	NC	NC	253337_at	1259.1	1150	1204.55	P	P	0.00293	0.001953	1029	1129.7	1079.35	P	P	0.00293	0.001953	0.4	0.1	0.2	0.1	0.2	0.141421	NC	NC	NC	NC	4	0	-0.1	NC	NC	900	1198.5	1049.25	P	P
253335_at	AT4G33500	12	4	4	4		NC		I	NC	NC	NC	NC	NC	253335_at	842.4	1124.5	983.45	P	P	0.000244	0.000244	1483.3	1362.7	1423	P	P	0.000244	0.000244	0.9	0.5	0.6	0.2	0.55	0.288675	I	I	I	NC	3	0.4	-0.2	I	NC	1128.2	1037.5	1082.85	P	P
253298_at	AT4G33560	12	4	4	4				D	NC	NC	NC		NC	253298_at	1687.3	1160.2	1423.75	P	P	0.000244	0.000244	626.5	1597.1	1111.8	P	P	0.000244	0.000244	-1.2	-0.8	-0.4	0.2	-0.55	0.597216	D	D	NC	NC	2	-0.5	0.7	D	I	856.6	1195	1025.8	P	P
253305_at	AT4G33666;AT4G33670	12	4	4	4			NC	NC	NC	NC	D	NC	NC	253305_at	1719.6	1899.2	1809.4	P	P	0.001221	0.00293	2294	1695.9	1994.95	P	P	0.001953	0.001221	0.4	0.3	0.1	-0.1	0.175	0.221736	I	NC	NC	NC	1	0.1	-0.3	NC	D	1662.7	1665.9	1664.3	P	P
253301_at	AT4G33720	12	4	4	4	D		NC	D	NC	NC	I		NC	253301_at	34780.5	31810.1	33295.3	P	P	0.000244	0.000244	12169.1	24507.7	18338.4	P	P	0.000244	0.000244	-1.4	-1.3	-0.5	-0.5	-0.925	0.492443	D	D	D	D	4	-0.1	0.8	NC	I	29284.5	36252	32768.2	P	P
253303_at	AT4G33780	12	4	4	4		NC	NC	D	NC	NC	NC	NC	NC	253303_at	1485.7	1386.3	1436	P	P	0.000244	0.000244	1118.8	1325.2	1222	P	P	0.000244	0.000244	-0.4	-0.3	-0.3	-0.2	-0.3	0.0816497	D	NC	NC	NC	1	-0.1	-0.1	NC	NC	1690.7	1595.8	1643.25	P	P
253273_at	AT4G34180	12	4	4	4		NC	NC	D		NC	I	NC	NC	253273_at	9674.7	9540	9607.35	P	P	0.000244	0.000244	7642.8	7412.9	7527.85	P	P	0.000244	0.000244	-0.5	-0.3	-0.4	-0.3	-0.375	0.0957427	D	D	D	NC	3	-0.1	0.1	NC	NC	9820.8	9586.4	9703.6	P	P
253277_at	AT4G34230	12	4	4	4	D	NC	NC	D		NC	I		NC	253277_at	5259.8	4293.8	4776.8	P	P	0.000244	0.000244	3129.6	3515.6	3322.6	P	P	0.000244	0.000244	-0.5	-0.4	-0.5	-0.3	-0.425	0.0957427	D	D	D	D	4	-0.1	0.2	NC	NC	5178.1	5625.4	5401.75	P	P
253285_at	AT4G34250	12	4	4	4	NC	NC	NC	NC	NC	NC	D	NC	NC	253285_at	222	232.5	227.25	P	P	0.01416	0.008057	240.6	246.7	243.65	P	P	0.001953	0.00293	0.1	0.4	0.1	0.5	0.275	0.206155	NC	NC	NC	NC	4	-0.3	0	NC	NC	213.6	194.5	204.05	P	P
253286_at	AT4G34260	12	4	4	4	NC	NC	NC	I	NC	NC		NC	NC	253286_at	1068.9	1065.5	1067.2	P	P	0.000244	0.000244	1311.1	1305.8	1308.45	P	P	0.000244	0.000244	0.3	-0.2	0.2	0	0.075	0.221736	NC	NC	NC	NC	4	0.2	-0.1	NC	NC	904.3	1079.1	991.7	P	P
253233_at	AT4G34290	12	4	4	4		NC	NC	I	NC	NC		NC	NC	253233_at	3530.3	3266.5	3398.4	P	P	0.000244	0.000244	4003.5	4041.4	4022.45	P	P	0.000244	0.000244	0.1	0.2	0.2	0.3	0.2	0.0816497	NC	NC	NC	I	3	-0.1	0.1	NC	NC	3624.1	3345.8	3484.95	P	P
253235_at	AT4G34350	12	4	4	4			NC	I	NC	NC		NC	NC	253235_at	6180.8	6236.6	6208.7	P	P	0.000244	0.000244	7320.7	5431.2	6375.95	P	P	0.000244	0.000244	0.3	0.3	-0.1	-0.2	0.075	0.262996	I	I	NC	NC	2	0.1	-0.5	NC	D	5573.8	5231.2	5402.5	P	P
253238_at	AT4G34480	12	4	4	4	NC	NC	NC		NC	NC	I	NC	NC	253238_at	926.4	789.6	858	P	P	0.000732	0.000732	901.3	1011.5	956.4	P	P	0.000732	0.000244	-0.1	0	0	0.3	0.05	0.173205	NC	NC	NC	NC	4	-0.2	0.2	NC	NC	1079.1	1039.5	1059.3	P	P
253247_at	AT4G34610	12	4	4	4		NC	NC	I	NC	NC		NC	NC	253247_at	371.3	472.2	421.75	P	P	0.005859	0.001221	567.5	480.3	523.9	P	P	0.000244	0.000732	0.8	0.5	0.2	-0.1	0.35	0.387298	I	I	NC	NC	2	0.4	-0.4	NC	NC	367.1	417.8	392.45	P	P
253248_at	AT4G34670	12	4	4	4	NC	NC	NC	NC	NC	NC	D	NC	NC	253248_at	16379	15521.6	15950.3	P	P	0.000244	0.000244	15875.9	15243.3	15559.6	P	P	0.000244	0.000244	0	0.1	-0.1	-0.1	-0.025	0.0957427	NC	NC	NC	NC	4	0	-0.1	NC	NC	15286.9	14710.4	14998.6	P	P
253252_at	AT4G34740	12	4	4	4	NC	NC	NC			NC	D	NC	NC	253252_at	1455.6	1473.6	1464.6	P	P	0.000244	0.000244	1185.8	1448.4	1317.1	P	P	0.000244	0.000244	-0.1	-0.1	-0.2	-0.3	-0.175	0.0957427	NC	NC	NC	NC	4	0.1	0	NC	NC	1479.5	1215.9	1347.7	P	P
253208_at	AT4G34820	12	4	4	4		NC	NC	I	NC	NC	NC	NC	NC	253208_at	1772.2	2030.8	1901.5	P	P	0.000244	0.000244	2436.2	2190	2313.1	P	P	0.000244	0.000244	0.4	0.3	0.2	0.1	0.25	0.129099	I	NC	NC	NC	1	0.2	-0.1	NC	NC	1961.4	1895.6	1928.5	P	P
253209_at	AT4G34830	12	4	4	4		NC	NC	I	NC	NC	NC	NC	NC	253209_at	679.9	758.8	719.35	P	P	0.037598	0.01416	902.5	632.8	767.65	P	P	0.008057	0.005859	0.6	0.3	0.2	-0.1	0.25	0.288675	I	NC	NC	NC	1	0.3	-0.4	NC	NC	735.1	715.3	725.2	P	P
253221_at	AT4G34870	12	4	4	4			NC	D	NC	NC	NC	NC	NC	253221_at	22803.1	21007.9	21905.5	P	P	0.000244	0.000244	17025.2	20711.9	18868.5	P	P	0.000244	0.000244	-0.4	-0.3	-0.2	0	-0.225	0.170783	D	D	NC	NC	2	-0.1	0.2	NC	I	23155.1	24995.2	24075.2	P	P
253181_at	AT4G35180	7	4	2	1	NC	NC	NC	D	NC	NC			NC	253181_at	390.7	254.2	322.45	P	P	0.008057	0.01416	328	319.4	323.7	P	P	0.030273	0.018555	-0.2	0.2	-0.5	0.1	-0.1	0.316228	NC	NC	NC	NC	4	-0.3	-0.2	NC	NC	289.1	211.7	250.4	P	P
253197_at	AT4G35250	12	4	4	4	NC	NC	NC		NC	NC	D	NC	NC	253197_at	5238.5	5071	5154.75	P	P	0.000244	0.000244	5601.8	5130.4	5366.1	P	P	0.000244	0.000244	0.2	0.2	-0.1	-0.1	0.05	0.173205	NC	NC	NC	NC	4	0	-0.3	NC	NC	5249.9	5274.3	5262.1	P	P
253162_at	AT4G35640;AT4G35630	12	4	4	4		NC	NC	D	NC	NC			NC	253162_at	10206.2	9917.7	10062	P	P	0.000244	0.000244	8701.8	9037.4	8869.6	P	P	0.000244	0.000244	-0.2	-0.3	0	-0.1	-0.15	0.129099	D	D	NC	NC	2	0.1	0.2	NC	NC	11050.2	11262	11156.1	P	P
253133_at	AT4G35800	12	4	4	4	NC	NC	NC	I	NC	NC		NC	NC	253133_at	1135.7	1196.9	1166.3	P	P	0.000244	0.000244	1401.7	1306.9	1354.3	P	P	0.000244	0.000244	0.2	0	0.1	0	0.075	0.0957427	NC	NC	NC	NC	4	0.1	-0.1	NC	NC	797.1	908.2	852.65	P	P
253109_at	AT4G35920	12	4	4	4		NC	NC	I	NC	NC	NC	NC	NC	253109_at	957	1073.5	1015.25	P	P	0.000244	0.000244	1541.8	1355.3	1448.55	P	P	0.000244	0.000244	0.8	0.6	0.5	0.4	0.575	0.170783	I	I	I	NC	3	0.1	-0.2	NC	NC	1012.1	994.8	1003.45	P	P
253125_at	AT4G36040	12	4	4	4	D	NC	NC	D		NC	D	NC	NC	253125_at	10011.4	9627.2	9819.3	P	P	0.000732	0.000732	7922.8	5203.2	6563	P	P	0.000732	0.000732	-0.6	-0.3	-0.8	-0.6	-0.575	0.206155	D	D	D	D	4	-0.2	-0.3	NC	NC	8459.2	9226.3	8842.75	P	P
253083_at	AT4G36250	12	4	4	4	NC	NC	NC	I	NC	NC	NC	NC	NC	253083_at	2145.2	2149.1	2147.15	P	P	0.000244	0.000244	2400.1	2232.8	2316.45	P	P	0.000244	0.000244	0.1	0.1	0	0	0.05	0.057735	NC	NC	NC	NC	4	0.1	-0.1	NC	NC	2029.1	2248.3	2138.7	P	P
253090_at	AT4G36360	12	4	4	4		NC	NC	I	NC	NC	NC	NC	NC	253090_at	2523.9	2520.8	2522.35	P	P	0.000244	0.000244	3183.4	2960.3	3071.85	P	P	0.000244	0.000244	0.5	0.3	0.6	0.3	0.425	0.15	MI	I	I	I	1	0.2	0	NC	NC	1809.7	2227.8	2018.75	P	P
246237_at	AT4G36390	12	4	4	4	NC	NC	NC	I	NC	NC	NC	NC	NC	246237_at	2440.9	2927.1	2684	P	P	0.000244	0.000244	3248.7	2889.7	3069.2	P	P	0.000244	0.000244	0.4	0.2	0.2	-0.1	0.175	0.206155	NC	NC	NC	NC	4	0.1	-0.2	NC	NC	2433.5	2589.5	2511.5	P	P
246270_at	AT4G36500	12	4	4	4		NC		D	NC	NC	NC	NC	NC	246270_at	2542.1	1978.6	2260.35	P	P	0.000244	0.000244	2009.8	2036.7	2023.25	P	P	0.000244	0.000244	-0.3	0	-0.3	0	-0.15	0.173205	D	NC	NC	NC	1	-0.3	0	D	NC	2719.2	2581.3	2650.25	P	P
246275_at	AT4G36540	12	4	4	4	I	NC	NC						NC	246275_at	1199.3	1397.8	1298.55	P	P	0.005859	0.005859	1999.9	1558.5	1779.2	P	P	0.00293	0.001221	0.8	0.5	0.5	0.2	0.5	0.244949	I	I	I	I	4	0.3	-0.2	NC	NC	1494.8	971.9	1233.35	P	P
246247_at	AT4G36640	12	4	4	4	NC	NC	NC	NC	NC	NC	I	NC	NC	246247_at	1118	1306	1212	P	P	0.000244	0.000244	1175.7	1114	1144.85	P	P	0.000244	0.000244	0.1	0	0	-0.2	-0.025	0.125831	NC	NC	NC	NC	4	0.2	-0.1	NC	NC	1197.3	1388.5	1292.9	P	P
246238_at	AT4G36670	12	4	4	4	D	NC	NC			NC	NC	NC	NC	246238_at	3548.6	2644.1	3096.35	P	P	0.000244	0.000244	1777.3	1642.4	1709.85	P	P	0.000244	0.000244	-0.8	-0.4	-0.9	-0.5	-0.65	0.238048	D	D	D	D	4	-0.3	-0.1	NC	NC	2802.5	2651.9	2727.2	P	P
246201_at	AT4G36750	12	4	4	4			NC	D	NC	NC	NC	NC	NC	246201_at	1871.7	1431.6	1651.65	P	P	0.000732	0.000732	1349.5	1654.8	1502.15	P	P	0.000244	0.000732	-0.5	-0.2	-0.2	0.1	-0.2	0.244949	D	D	NC	NC	2	-0.2	0.3	NC	I	1991	2329.1	2160.05	P	P
246214_at	AT4G36990	12	4	4	4	NC	NC	NC	NC		NC	I	NC	NC	246214_at	1585.2	1709.8	1647.5	P	P	0.000244	0.000244	1822.3	1899.1	1860.7	P	P	0.000244	0.000244	0.2	0.1	0.2	0.1	0.15	0.057735	NC	NC	NC	NC	4	-0.1	0	NC	NC	1491.9	1588.9	1540.4	P	P
246197_at	AT4G37010	12	4	4	4	NC	NC	NC	NC	NC	NC	I	NC	NC	246197_at	208.6	186	197.3	P	P	0.00293	0.001221	277.4	313	295.2	P	P	0.000732	0.000732	-0.1	0	0.1	0	0	0.0816497	NC	NC	NC	NC	4	0.1	-0.1	NC	NC	364.5	293.5	329	P	P
246231_at	AT4G37080	12	4	4	4	I	NC	NC	I	NC	NC	NC	NC	NC	246231_at	306.9	307.7	307.3	P	P	0.001953	0.00293	458.1	484.7	471.4	P	P	0.001953	0.000732	0.8	0.6	0.7	0.4	0.625	0.170783	I	I	I	I	4	-0.1	-0.3	NC	NC	351.2	309.4	330.3	P	P
246269_at	AT4G37110	12	4	4	4	NC	NC	NC	I	NC	NC	NC	NC	NC	246269_at	290.3	333.7	312	P	P	0.001221	0.001221	372.9	405.8	389.35	P	P	0.000244	0.000244	0.5	0	0.1	0.2	0.2	0.216025	NC	NC	NC	NC	4	0.4	0	NC	NC	233.3	285.4	259.35	P	P
246272_at	AT4G37150	8	4	2	2			NC			NC	I	NC	NC	246272_at	449.5	500.6	475.05	P	P	0.046143	0.046143	631.4	403	517.2	P	P	0.046143	0.037598	0.5	0.3	-0.1	-0.2	0.125	0.330404	I	NC	NC	NC	1	0.1	-0.6	NC	MD	461.9	498.5	480.2	P	A
246234_at	AT4G37280	12	4	4	4	NC	NC	NC	I	NC	NC	NC	NC	NC	246234_at	884.2	954.9	919.55	P	P	0.00293	0.001953	932.1	882.1	907.1	P	P	0.005859	0.000732	0.4	0.2	0.2	0	0.2	0.163299	NC	NC	NC	NC	4	0.2	-0.2	NC	NC	989.3	687.9	838.6	P	P
253052_at	AT4G37310	12	4	4	4	NC	NC	NC	NC	NC	NC	I	NC	NC	253052_at	1815.8	1763.9	1789.85	P	P	0.000244	0.000244	1534.2	1618.4	1576.3	P	P	0.000244	0.000244	0	0	-0.2	-0.3	-0.125	0.15	NC	NC	NC	NC	4	-0.1	-0.3	NC	NC	1904.8	1956.7	1930.75	P	P
253046_at	AT4G37370	12	4	4	4		NC	NC			NC	I	NC	NC	253046_at	598.1	500.2	549.15	P	P	0.000732	0.00415	551.2	396.4	473.8	P	P	0.001953	0.00415	0.1	0.1	-0.6	-0.3	-0.175	0.340343	NC	NC	D	NC	3	-0.1	-0.5	NC	NC	622.6	731.5	677.05	P	P
253092_at	AT4G37380	8	2	2	4	NC	NC	NC	I	NC	NC	NC	NC	NC	253092_at	208.5	156.9	182.7	M	A	0.056152	0.111572	209.3	211.7	210.5	P	P	0.037598	0.017822	0.2	0.4	0.2	0.2	0.25	0.1	NC	NC	NC	NC	4	-0.1	-0.1	NC	NC	125.5	92.8	109.15	A	A
253053_at	AT4G37470	12	4	4	4		NC	NC	D	NC	NC	NC	NC	NC	253053_at	3922.9	3045.8	3484.35	P	P	0.000244	0.000244	3125.1	3416.5	3270.8	P	P	0.000244	0.000244	-0.3	0	-0.2	0.1	-0.1	0.182574	D	NC	NC	NC	1	-0.3	0.1	NC	NC	3554.3	3468.9	3511.6	P	P
253095_at	AT4G37510	12	4	4	4	NC	NC	NC	I		NC	D	NC	NC	253095_at	1845.7	2157.3	2001.5	P	P	0.001953	0.000732	2185.6	2166.7	2176.15	P	P	0.001221	0.001221	0.2	0.1	0.2	0.1	0.15	0.057735	NC	NC	NC	NC	4	0.2	0	NC	NC	1890.8	1830.1	1860.45	P	P
253099_s_at	AT4G37530;AT4G37520	12	4	4	4	D	NC	NC			NC	I	NC	NC	253099_s_at	4234.9	3641.8	3938.35	P	P	0.000244	0.000244	2807.8	3222.8	3015.3	P	P	0.000244	0.000244	-0.9	-0.7	-0.6	-0.5	-0.675	0.170783	D	D	D	D	4	-0.2	0.2	NC	NC	4610.4	4847.2	4728.8	P	P
253042_at	AT4G37550	12	4	4	4			NC		NC	NC	D	NC	NC	253042_at	1740.2	2193	1966.6	P	P	0.000244	0.000244	2470.3	1740.6	2105.45	P	P	0.000244	0.000244	0.4	0.3	0.1	-0.1	0.175	0.221736	I	MI	NC	NC	1	0.1	-0.4	NC	D	1686.5	1662.6	1674.55	P	P
253062_at	AT4G37590	12	4	4	4		NC		I	NC	NC		NC	NC	253062_at	474.6	674.1	574.35	P	P	0.005859	0.001953	1059.3	855.8	957.55	P	P	0.000732	0.000732	1.2	0.4	0.7	0.2	0.625	0.434933	I	I	I	NC	3	0.5	-0.2	I	NC	875.8	497.5	686.65	P	P
253061_at	AT4G37610	12	4	4	4	D	NC	NC		NC		D	NC	NC	253061_at	1755.9	2123.8	1939.85	P	P	0.001953	0.005859	1037.6	975.7	1006.65	P	P	0.023926	0.01416	-0.8	-1.1	-1.3	-1.5	-1.175	0.298608	D	D	D	D	4	0.3	-0.4	NC	NC	2142.6	1264.3	1703.45	P	P
253010_at	AT4G37750	12	4	4	4	I	NC	NC	I	NC	NC		NC	NC	253010_at	422.6	422.4	422.5	P	P	0.030273	0.018555	767.7	727.5	747.6	P	P	0.000732	0.001221	0.9	0.8	0.6	0.7	0.75	0.129099	I	I	I	I	4	0	-0.2	NC	NC	464.5	321.7	393.1	P	P
253028_at	AT4G38160	12	4	4	4		NC	NC	I	NC	NC	NC	NC	NC	253028_at	1670.8	1741.3	1706.05	P	P	0.000244	0.000244	1746.6	1780.5	1763.55	P	P	0.000244	0.000244	0.3	0.2	0.2	0.1	0.2	0.0816497	I	NC	NC	NC	1	0.1	-0.1	NC	NC	1724.9	1613.4	1669.15	P	P
253006_at	AT4G38260;AT4G38250	12	4	4	4		NC	NC	D	NC	NC	NC	NC	NC	253006_at	6758.1	5985.6	6371.85	P	P	0.000244	0.000244	5163.1	5862.6	5512.85	P	P	0.000244	0.000244	-0.4	-0.2	-0.3	0	-0.225	0.170783	D	D	NC	NC	2	-0.3	0.1	NC	NC	6161.1	6936.8	6548.95	P	P
253004_at	AT4G38280;AT4G38330;AT2G45250	12	4	4	4	NC	NC	NC	I	NC	NC	NC	NC	NC	253004_at	1085.2	1369.5	1227.35	P	P	0.000977	0.000977	1474.8	1298.4	1386.6	P	P	0.000977	0.000977	0.3	0.1	0.2	0	0.15	0.129099	NC	NC	NC	NC	4	0.2	-0.1	NC	NC	1392.7	1000.6	1196.65	P	P
252993_at	AT4G38540	12	4	4	4		NC	NC			NC	I	NC	NC	252993_at	2966.5	3071	3018.75	P	P	0.000244	0.000244	2112.3	2576.9	2344.6	P	P	0.000244	0.000244	-0.4	-0.5	-0.2	-0.2	-0.325	0.15	D	D	NC	NC	2	0.1	0.3	NC	NC	2759.6	3094.7	2927.15	P	P
252976_s_at	AT4G38550	12	4	4	4		NC		D	NC	NC	I	NC	NC	252976_s_at	2840.7	2723.8	2782.25	P	P	0.000732	0.001221	2272.5	2580	2426.25	P	P	0.000244	0.001221	-0.7	-0.2	-0.3	0	-0.3	0.294392	D	D	NC	NC	2	-0.3	0.3	MD	NC	2620.4	3080.8	2850.6	P	P
252955_at	AT4G38630	12	4	4	4	D	NC	NC		NC	NC	NC	NC	NC	252955_at	4853.7	4927.5	4890.6	P	P	0.000244	0.000244	3975.7	3926.6	3951.15	P	P	0.000244	0.000244	-0.3	-0.3	-0.3	-0.2	-0.275	0.05	D	D	D	D	4	0	0	NC	NC	4618.8	6180	5399.4	P	P
252954_at	AT4G38660	12	4	4	4	I	NC	NC	NC	NC	NC	NC	NC	NC	252954_at	1332.8	1194.7	1263.75	P	P	0.001221	0.001221	1744.3	2065.7	1905	P	P	0.001221	0.000244	0.4	0.5	0.4	0.7	0.5	0.141421	I	I	I	I	4	-0.1	0.1	NC	NC	1402.2	1239.4	1320.8	P	P
252960_at	AT4G38750	12	4	4	4		NC	NC	I	NC	NC	NC	NC	NC	252960_at	536.4	496.4	516.4	P	P	0.01416	0.005859	857.8	575.9	716.85	P	P	0.001953	0.00415	0.7	0.7	0.3	0.4	0.525	0.206155	I	I	NC	NC	2	-0.1	-0.4	NC	NC	421.2	431.5	426.35	P	P
252968_at	AT4G38890	12	4	4	4		NC	NC	I	NC	NC	NC	NC	NC	252968_at	1086	1243.4	1164.7	P	P	0.000244	0.000244	1623.9	1337.9	1480.9	P	P	0.000244	0.000244	0.6	0.3	0.3	0	0.3	0.244949	I	MI	NC	NC	1	0.3	-0.3	NC	NC	1151.6	1167.7	1159.65	P	P
252926_at	AT4G38920	12	4	4	4		NC	NC	D	NC	NC	NC	NC	NC	252926_at	22524.5	20183	21353.8	P	P	0.000244	0.000244	17572.7	18870.6	18221.7	P	P	0.000244	0.000244	-0.3	-0.2	-0.2	-0.1	-0.2	0.0816497	D	D	NC	NC	2	-0.2	0.1	NC	NC	19953.8	21094.1	20524	P	P
252922_at	AT4G39040	12	4	4	4		NC		I	NC	NC	NC	NC	NC	252922_at	2871.8	3390.1	3130.95	P	P	0.000244	0.000244	4026.8	3546.2	3786.5	P	P	0.000244	0.000244	0.5	0.2	0.3	0	0.25	0.208167	I	NC	I	NC	2	0.2	-0.1	I	NC	3112	3311.8	3211.9	P	P
252878_at	AT4G39460	12	4	4	4	NC	NC	NC		NC	NC	D	NC	NC	252878_at	2589	2962.4	2775.7	P	P	0.000244	0.000244	3049.3	3013.4	3031.35	P	P	0.000244	0.000244	0.3	0.1	0.2	0.1	0.175	0.0957427	NC	NC	NC	NC	4	0.2	-0.1	NC	NC	2578.5	2782.3	2680.4	P	P
252904_at	AT4G39620	12	4	4	4		NC	NC	I	NC	NC	NC	NC	NC	252904_at	654.3	550.7	602.5	P	P	0.000244	0.000244	736.4	698.7	717.55	P	P	0.000244	0.000244	0.4	0.3	0.5	0.1	0.325	0.170783	I	I	NC	NC	2	0.1	-0.2	NC	NC	556.3	494.4	525.35	P	P
252882_at	AT4G39675	12	4	4	4				D	NC	NC				252882_at	2383.8	1291.2	1837.5	P	P	0.000244	0.000244	1852.9	3012.7	2432.8	P	P	0.000244	0.000244	-0.2	0.6	0.4	1.2	0.5	0.57735	NC	I	I	I	1	-0.9	0.6	D	I	1701.1	1878	1789.55	P	P
252828_at	AT4G39960	12	4	4	4	NC	NC	NC	I	NC	NC	NC	NC	NC	252828_at	1356.8	1357	1356.9	P	P	0.000732	0.000244	1719.2	1652.5	1685.85	P	P	0.000732	0.000732	0.2	0	0.2	0.1	0.125	0.0957427	NC	NC	NC	NC	4	0.2	0	NC	NC	1220	1250.1	1235.05	P	P
252833_at	AT4G40090	12	4	4	4			NC	D	NC	NC	NC	NC	NC	252833_at	640.4	609.4	624.9	P	P	0.000244	0.000244	302.9	479.7	391.3	P	P	0.00293	0.000732	-1	-0.9	-0.4	-0.2	-0.625	0.386221	D	D	D	NC	3	-0.2	0.7	NC	I	670.4	607.3	638.85	P	P
251142_at	AT5G01015	12	4	4	4	I	NC	NC	NC	NC	NC		NC	NC	251142_at	926.7	987.4	957.05	P	P	0.000732	0.001221	1663.4	1231.4	1447.4	P	P	0.000244	0.000244	0.7	0.6	0.7	0.6	0.65	0.057735	I	I	I	I	4	0.1	0.1	NC	NC	1023.5	907.3	965.4	P	P
251144_at	AT5G01210	12	4	4	4	D	NC	NC	NC	NC	NC	I	NC	NC	251144_at	2832.8	2613.7	2723.25	P	P	0.000244	0.000244	1607	1696.4	1651.7	P	P	0.000244	0.000244	-0.8	-0.8	-0.7	-0.6	-0.725	0.0957427	D	D	D	D	4	0	0.1	NC	NC	2659.9	2602.9	2631.4	P	P
251083_at	AT5G01590	12	4	4	4		NC	NC	I	NC	NC	NC	NC	NC	251083_at	1040.2	1071.7	1055.95	P	P	0.008057	0.008057	1174	1201.6	1187.8	P	P	0.005859	0.001953	0.1	0.3	0.2	0.4	0.25	0.129099	NC	NC	MI	NC	3	0	0	NC	NC	1551.4	1341	1446.2	P	P
251109_at	AT5G01600	12	4	4	4	D	NC	NC	D	NC	NC		NC	NC	251109_at	18531.4	19427.2	18979.3	P	P	0.000244	0.000244	8636.1	9986.8	9311.45	P	P	0.000244	0.000244	-1.1	-1.2	-0.8	-0.9	-1	0.182574	D	D	D	D	4	0	0.3	NC	NC	15798.3	20114.1	17956.2	P	P
251031_at	AT5G02120	12	4	4	4	NC	NC	NC		NC		D	NC	NC	251031_at	10296.9	8837.4	9567.15	P	P	0.000732	0.000732	10289.8	8369.6	9329.7	P	P	0.000244	0.000244	0	0.1	-0.2	-0.2	-0.075	0.15	NC	NC	NC	NC	4	-0.1	-0.2	NC	NC	11980.9	8716.5	10348.7	P	P
251052_at	AT5G02470	12	4	4	4	I	NC	NC	I	NC	NC	I	NC	NC	251052_at	617.6	697.5	657.55	P	P	0.005859	0.000732	1305.1	1325	1315.05	P	P	0.000244	0.000244	1.3	1.1	1.3	1	1.175	0.15	I	I	I	I	4	0.3	0	NC	NC	720.7	751.6	736.15	P	P
251015_at	AT5G02480	12	4	4	4	NC	NC	NC	I	NC	NC	NC	NC	NC	251015_at	4408.7	4809.3	4609	P	P	0.000244	0.000244	5025.5	4642	4833.75	P	P	0.000244	0.000244	0	-0.1	0.1	-0.1	-0.025	0.0957427	NC	NC	NC	NC	4	0.1	0	NC	NC	4273.9	4471.9	4372.9	P	P
251012_at	AT5G02580	6	3	2	1		NC	NC	D	NC	NC	NC	NC	NC	251012_at	182.5	174.9	178.7	P	P	0.00415	0.046143	168.7	210.5	189.6	M	P	0.056152	0.001221	0.2	0.1	-0.2	0.2	0.075	0.189297	NC	NC	NC	I	3	0	0.1	NC	NC	203.5	200	201.75	P	P
251017_at	AT5G02760	12	4	4	4	NC	NC	NC			NC	D	NC	NC	251017_at	654.2	759.2	706.7	P	P	0.000244	0.000244	627.7	551.1	589.4	P	P	0.000244	0.000244	0	-0.1	-0.2	-0.3	-0.15	0.129099	NC	NC	NC	NC	4	0.2	-0.3	NC	NC	599.3	749	674.15	P	P
250971_at	AT5G02810	12	4	4	4			NC	I	NC	NC		NC	NC	250971_at	512.8	568	540.4	P	P	0.000732	0.000732	706	558.3	632.15	P	P	0.000244	0.000732	0.5	0.6	-0.1	0	0.25	0.351188	I	I	NC	NC	2	0	-0.8	NC	D	509.6	492.9	501.25	P	P
250987_at	AT5G02860	12	4	4	4	NC	NC	NC	I	NC	NC	NC	NC	NC	250987_at	276	335	305.5	P	P	0.018555	0.018555	270	395.2	332.6	P	P	0.037598	0.01416	-0.1	0	-0.1	0.3	0.025	0.189297	NC	NC	NC	NC	4	-0.2	0.2	NC	NC	266.1	292	279.05	P	P
250968_at	AT5G02890	12	4	4	4	I	NC	NC	NC	NC	NC	NC	NC	NC	250968_at	456.2	414.4	435.3	P	P	0.005859	0.005859	651.8	670.9	661.35	P	P	0.001221	0.001953	0.5	0.7	0.8	0.7	0.675	0.125831	I	I	I	I	4	-0.1	0.1	NC	NC	435.9	352.8	394.35	P	P
250960_at	AT5G02940	12	4	4	4		NC	NC	I	NC	NC		NC	NC	250960_at	683.1	732	707.55	P	P	0.00293	0.000244	807.9	606.7	707.3	P	P	0.000244	0.000244	0.4	0.2	-0.2	-0.2	0.05	0.3	I	NC	NC	NC	1	0.2	-0.3	NC	NC	557.3	708.1	632.7	P	P
250937_at	AT5G03230	12	4	4	4	D	NC	NC			NC	NC	NC	NC	250937_at	1115.4	964.1	1039.75	P	P	0.000244	0.000244	869.1	790.4	829.75	P	P	0.000732	0.001221	-0.7	-0.5	-0.8	-0.5	-0.625	0.15	D	D	D	D	4	-0.2	-0.2	NC	NC	963.1	989.7	976.4	P	P
250898_at	AT5G03300	12	4	4	4	NC	NC	NC	NC	NC	NC	D	NC	NC	250898_at	4871.2	5216.5	5043.85	P	P	0.000244	0.000244	5174.8	5829.2	5502	P	P	0.000244	0.000244	0.1	0	0.1	0.1	0.075	0.05	NC	NC	NC	NC	4	0.2	0	NC	NC	5247.4	5830.2	5538.8	P	P
250946_at	AT5G03420	12	4	4	4		NC		I	NC	NC	NC	NC	NC	250946_at	551.4	741.2	646.3	P	P	0.00293	0.001953	698.8	670.7	684.75	P	P	0.001221	0.001221	0.5	0.2	0.4	0.1	0.3	0.182574	I	NC	I	NC	2	0.4	-0.2	I	NC	647.9	632.5	640.2	P	P
250897_at	AT5G03430	12	4	4	4		NC	NC	I	NC	NC	NC	NC	NC	250897_at	1067.1	1390.2	1228.65	P	P	0.000244	0.000244	1543.2	1397.8	1470.5	P	P	0.000244	0.000244	0.5	0.2	0.3	0.1	0.275	0.170783	I	NC	NC	NC	1	0.2	-0.2	NC	NC	1208.6	1190.3	1199.45	P	P
250865_at	AT5G03900	12	4	4	4		NC	NC	I	NC	NC	NC	NC	NC	250865_at	929.8	1241.8	1085.8	P	P	0.000244	0.000732	1696.4	1526.6	1611.5	P	P	0.000244	0.000244	0.5	0.2	0.2	0	0.225	0.206155	I	MI	NC	NC	1	0.2	-0.4	NC	NC	1001.2	990.1	995.65	P	P
250884_at	AT5G03940	12	4	4	4		NC		I	NC	NC	NC	NC	NC	250884_at	2069.2	2982.5	2525.85	P	P	0.000732	0.000732	3212.6	2834	3023.3	P	P	0.000244	0.000244	0.4	0.2	0.3	-0.1	0.2	0.216025	I	NC	NC	NC	1	0.3	-0.3	I	NC	3013.1	2414.2	2713.65	P	P
245701_at	AT5G04140	12	4	4	4			NC	I	NC	NC	NC	NC	NC	245701_at	10202.5	10172.3	10187.4	P	P	0.000244	0.000244	13545.3	10845.6	12195.5	P	P	0.000244	0.000244	0.5	0.3	0.2	-0.1	0.225	0.25	I	I	NC	NC	2	0.2	-0.3	NC	D	8690.7	8700.5	8695.6	P	P
245690_at	AT5G04230	12	4	4	4	NC	NC	NC	NC	NC	NC	D	NC	NC	245690_at	973.6	858.6	916.1	P	P	0.000732	0.000244	894.2	817.6	855.9	P	P	0.000244	0.000244	-0.3	-0.1	-0.2	-0.2	-0.2	0.0816497	NC	NC	NC	NC	4	-0.1	0	NC	NC	852.8	838	845.4	P	P
245711_at	AT5G04340	12	4	4	4	D	NC	NC	D	NC	NC	NC	NC	NC	245711_at	1040.4	717.6	879	P	P	0.001221	0.001953	517.7	396.2	456.95	P	P	0.023926	0.008057	-0.9	-0.8	-1	-0.9	-0.9	0.0816497	D	D	D	D	4	-0.2	0	NC	NC	827.7	926.5	877.1	P	P
250854_at	AT5G04710	12	4	4	4	NC	NC	NC	I	NC	NC	NC	NC	NC	250854_at	1790	1468.7	1629.35	P	P	0.000244	0.000732	1384.3	1862.8	1623.55	P	P	0.000732	0.000244	0	0.1	-0.1	0.1	0.025	0.0957427	NC	NC	NC	NC	4	-0.1	0	NC	NC	1680.6	1784.8	1732.7	P	P
250856_at	AT5G04810	12	4	4	4		NC	NC	I	NC	NC		NC	NC	250856_at	1210	887.5	1048.75	P	P	0.001221	0.000244	1396.4	1217.8	1307.1	P	P	0.000732	0.000732	0.5	0.5	0.2	0.1	0.325	0.206155	I	I	NC	NC	2	0.2	-0.4	NC	NC	1009	836.6	922.8	P	P
246952_at	AT5G04820	12	4	4	4	NC	NC	NC	NC	NC	NC	D	NC	NC	246952_at	502.4	550.3	526.35	P	P	0.000732	0.001221	463.6	424.9	444.25	P	P	0.001953	0.001221	0	0	-0.1	-0.1	-0.05	0.057735	NC	NC	NC	NC	4	0.1	-0.3	NC	NC	570.5	543.8	557.15	P	P
250801_at	AT5G04960	12	4	4	4			NC	D	NC	NC	NC	NC	NC	250801_at	820	830.3	825.15	P	P	0.000732	0.000732	571.3	682.8	627.05	P	P	0.001221	0.000732	-0.6	-0.6	-0.2	-0.2	-0.4	0.23094	D	D	NC	NC	2	0.1	0.3	NC	I	688.6	894.5	791.55	P	P
250823_at	AT5G05180	12	4	4	4		NC	NC	I	NC	NC	NC	NC	NC	250823_at	180.1	195.2	187.65	P	P	0.005859	0.000732	220	333.8	276.9	P	P	0.005859	0.00415	0.6	0.1	0.4	0.2	0.325	0.221736	I	NC	NC	NC	1	0.1	0.1	NC	NC	207.7	257.3	232.5	P	P
250800_at	AT5G05370	12	4	4	4				D	NC	NC	NC	NC	NC	250800_at	8754	7014.1	7884.05	P	P	0.000244	0.000244	6227.6	7282.2	6754.9	P	P	0.000244	0.000244	-0.4	-0.2	-0.2	0.1	-0.175	0.206155	D	D	NC	NC	2	-0.2	0.3	D	I	9464.3	8914.4	9189.35	P	P
250777_at	AT5G05440	12	4	4	4	D			D	NC	NC	NC	NC	NC	250777_at	5296.5	4167.8	4732.15	P	P	0.000244	0.000244	1863	2670.2	2266.6	P	P	0.000244	0.000244	-1.5	-1.1	-1	-0.6	-1.05	0.369685	D	D	D	D	4	-0.4	0.3	D	I	4591.2	4411.2	4501.2	P	P
250778_at	AT5G05500	12	4	4	4			NC	D	NC	NC	NC	NC	NC	250778_at	808.9	871.4	840.15	P	P	0.00293	0.00293	484.9	748.3	616.6	P	P	0.023926	0.00415	-0.8	-0.7	-0.3	-0.3	-0.525	0.262996	D	D	NC	MD	2	-0.1	0.3	NC	I	816.7	995.3	906	P	P
256417_s_at	AT5G05580;AT3G11170	12	4	4	4		NC	NC	I	NC	NC	NC	NC	NC	256417_s_at	9388.5	9130.7	9259.6	P	P	0.000244	0.000244	11110.5	9352.7	10231.6	P	P	0.000244	0.000244	0.3	0.3	0.2	0.1	0.225	0.0957427	I	I	NC	NC	2	0	-0.1	NC	NC	9956	9635.7	9795.85	P	P
250793_at	AT5G05600	12	4	4	4	D	NC	NC			NC	I		NC	250793_at	2536	2208.3	2372.15	P	P	0.00293	0.001953	1236.8	1416.7	1326.75	P	P	0.00293	0.00293	-0.9	-0.8	-0.7	-0.7	-0.775	0.0957427	D	D	D	D	4	-0.2	0	NC	NC	2129.2	2486.9	2308.05	P	P
251331_s_at	AT5G05620;AT3G61650	12	4	4	4		NC	NC	I	NC	NC	NC	NC	NC	251331_s_at	750.6	767.7	759.15	P	P	0.001221	0.000244	1096.5	862.8	979.65	P	P	0.000244	0.000244	0.5	0.4	0.3	0.3	0.375	0.0957427	I	MI	MI	NC	1	0	-0.3	NC	NC	738.2	772.5	755.35	P	P
250707_at	AT5G05950	12	4	4	4			NC	D	NC	NC	NC	NC	NC	250707_at	1891.9	1522.2	1707.05	P	P	0.000732	0.000244	1282.6	1528.4	1405.5	P	P	0.000732	0.000732	-0.5	-0.1	-0.3	0.1	-0.2	0.258199	D	NC	NC	NC	1	-0.4	0.2	NC	I	2082.2	1937.6	2009.9	P	P
250761_at	AT5G06050	12	4	4	4		NC	NC	I	NC	NC	NC	NC	NC	250761_at	466.6	439.1	452.85	P	P	0.000732	0.000732	615.2	551.2	583.2	P	P	0.000732	0.000732	0.6	0.4	0.5	0.3	0.45	0.129099	MI	NC	NC	NC	1	0	-0.1	NC	NC	448.2	555.8	502	P	P
250711_at	AT5G06110	12	4	4	4		NC	NC	I	NC	NC	NC	NC	NC	250711_at	1066.9	975.1	1021	P	P	0.000732	0.000244	1400.9	1658.3	1529.6	P	P	0.000244	0.000244	0.4	0.4	0.4	0.3	0.375	0.05	I	I	NC	NC	2	0.1	-0.2	NC	NC	1140.8	1193.6	1167.2	P	P
250734_at	AT5G06270	12	4	4	4	I	NC	NC	NC	NC	NC	NC	NC	NC	250734_at	606	785.3	695.65	P	P	0.000732	0.001953	824	856.4	840.2	P	P	0.000244	0.000244	0.7	0.5	0.3	0.4	0.475	0.170783	I	I	I	I	4	0	-0.2	NC	NC	573.2	451.8	512.5	P	P
250646_at	AT5G06720	12	4	4	4		NC	NC	D	NC	NC			NC	250646_at	688.6	582.9	635.75	P	P	0.000732	0.000732	534.3	551.6	542.95	P	P	0.000732	0.000244	-0.6	-0.2	-0.3	-0.2	-0.325	0.189297	D	NC	NC	NC	1	-0.2	0.1	NC	NC	601.9	687.6	644.75	P	P
250670_at	AT5G06860	12	4	4	4		NC	NC	D	NC	NC	NC	NC	NC	250670_at	5364.7	5850.4	5607.55	P	P	0.000244	0.000244	3782.3	4609.2	4195.75	P	P	0.000244	0.000244	-0.5	-0.6	-0.2	-0.3	-0.4	0.182574	D	D	NC	D	3	0	0.2	NC	NC	5326.5	6303.1	5814.8	P	P
250669_at	AT5G06870	12	4	4	4	D	NC	NC			NC		NC	NC	250669_at	3131.3	3292.3	3211.8	P	P	0.000244	0.000244	1452.4	1215.9	1334.15	P	P	0.000244	0.000244	-1.1	-1.1	-1.2	-1.2	-1.15	0.057735	D	D	D	D	4	0	-0.2	NC	NC	1965.7	2340.1	2152.9	P	P
250666_at	AT5G07100	12	4	4	4	D	NC	NC			NC	NC	NC	NC	250666_at	310.5	519.1	414.8	P	P	0.00293	0.008057	247.3	375.1	311.2	P	P	0.010742	0.01416	-0.6	-0.5	-0.6	-0.8	-0.625	0.125831	D	D	D	D	4	0.1	0.2	NC	NC	433.2	302	367.6	P	P
250613_at	AT5G07250;AT5G07240	12	4	4	4		NC	NC	I	NC	NC	NC	NC	NC	250613_at	647.6	683.3	665.45	P	P	0.046143	0.030273	872.7	715	793.85	P	P	0.023926	0.023926	0.6	0.3	0.4	0.1	0.35	0.208167	I	MI	NC	NC	1	0.2	-0.1	NC	NC	631.4	560.9	596.15	P	P
250617_at	AT5G07290	12	4	4	4	NC	NC	NC	I	NC	NC	NC	NC	NC	250617_at	422.9	615.8	519.35	P	P	0.000732	0.001221	689.3	542.1	615.7	P	P	0.000732	0.000244	0.4	0.3	0.2	0.2	0.275	0.0957427	NC	NC	NC	NC	4	0.3	-0.1	NC	NC	517	393.9	455.45	P	P
250580_at	AT5G07440	12	4	4	4	D	NC	NC			NC		NC	NC	250580_at	7524.7	7356.6	7440.65	P	P	0.000244	0.000244	5155.6	5560.6	5358.1	P	P	0.000244	0.000244	-0.5	-0.5	-0.3	-0.3	-0.4	0.11547	D	D	D	D	4	0	0.2	NC	NC	6509.5	6648.1	6578.8	P	P
250633_at	AT5G07460	12	4	4	4	NC	NC	NC			NC	I	NC	NC	250633_at	2848.7	3056.7	2952.7	P	P	0.001221	0.001953	2917.4	3144.9	3031.15	P	P	0.001221	0.000732	-0.3	-0.1	-0.2	0	-0.15	0.129099	NC	NC	NC	NC	4	-0.1	0.1	NC	NC	3189.5	3082.4	3135.95	P	P
250554_at	AT5G07900	12	4	4	4	NC	NC	NC	I	NC	NC	NC	NC	NC	250554_at	753.7	778	765.85	P	P	0.005859	0.001953	970.3	735.2	852.75	P	P	0.00293	0.00415	0.3	0.3	0.2	0.3	0.275	0.05	NC	NC	NC	NC	4	0	-0.2	NC	NC	783.3	553.2	668.25	P	P
250553_at	AT5G07960	12	4	4	4			NC	D	NC	NC	NC	NC	NC	250553_at	2670.3	2207.6	2438.95	P	P	0.000244	0.000244	1791.4	2201.2	1996.3	P	P	0.000244	0.000244	-0.5	-0.2	-0.2	0.1	-0.2	0.244949	D	NC	NC	NC	1	-0.2	0.3	NC	I	2745.3	2795.1	2770.2	P	P
250560_at	AT5G08020	12	4	4	4		NC	NC	I	NC	NC	NC	NC	NC	250560_at	497.9	589.2	543.55	P	P	0.023926	0.001953	681.3	526.8	604.05	P	P	0.00415	0.001953	0.4	0.3	0.2	0.1	0.25	0.129099	I	NC	NC	NC	1	0.2	-0.3	NC	NC	604.5	570.8	587.65	P	P
250563_at	AT5G08050	12	4	4	4	NC	NC	NC				D	NC	NC	250563_at	11294	9520.5	10407.2	P	P	0.000244	0.000244	9836	8708.6	9272.3	P	P	0.000244	0.000244	-0.1	0.1	-0.1	0	-0.025	0.0957427	NC	NC	NC	NC	4	-0.1	-0.1	NC	NC	13441.5	9063.9	11252.7	P	P
250569_at	AT5G08130	12	4	4	4	NC	NC	NC	I	NC	NC	NC	NC	NC	250569_at	643.4	791.4	717.4	P	P	0.000244	0.000244	854.9	668.5	761.7	P	P	0.000732	0.000244	0.3	0.4	0	0.1	0.2	0.182574	NC	NC	NC	NC	4	0	-0.3	NC	NC	505.7	731.8	618.75	P	P
246033_at	AT5G08280	12	4	4	4	NC	NC	NC	I		NC	D	NC	NC	246033_at	8229.6	7893.6	8061.6	P	P	0.000244	0.000244	8280.4	9017.7	8649.05	P	P	0.000244	0.000244	-0.1	0.1	0	0	0	0.0816497	NC	NC	NC	NC	4	0	0.1	NC	NC	8958	8085.1	8521.55	P	P
246011_at	AT5G08330	12	4	4	4		NC	NC	NC	NC	NC	D	NC	NC	246011_at	992.1	659.1	825.6	P	P	0.008057	0.01416	777.7	1042.5	910.1	P	P	0.008057	0.008057	0.1	0.4	0	0.5	0.25	0.238048	NC	NC	NC	I	3	-0.3	0	NC	NC	1158.3	1185.9	1172.1	P	P
246034_at	AT5G08350	12	4	4	4	D	NC	NC	NC	NC	NC	NC	NC	NC	246034_at	1158.5	1247.6	1203.05	P	P	0.00415	0.010742	957.7	763	860.35	P	P	0.018555	0.010742	-0.3	-0.3	-0.6	-0.7	-0.475	0.206155	D	D	D	D	4	0	-0.3	NC	NC	972.5	963	967.75	P	P
246057_at	AT5G08400	12	4	4	4		NC	NC	I	NC	NC	NC	NC	NC	246057_at	1209.5	1481.8	1345.65	P	P	0.000244	0.000244	1550.1	1549.2	1549.65	P	P	0.000244	0.000244	0.4	0.2	0.2	0.2	0.25	0.1	I	NC	I	NC	2	0.1	-0.1	NC	NC	1561.1	1512.1	1536.6	P	P
246058_at	AT5G08430	12	4	4	4				I	NC	NC	NC	NC	NC	246058_at	383.1	575.6	479.35	P	P	0.000244	0.000732	697.7	489	593.35	P	P	0.000244	0.000244	0.9	0.3	0.4	-0.1	0.375	0.411299	I	NC	NC	NC	1	0.5	-0.5	I	D	474.1	399	436.55	P	P
250529_at	AT5G08620;AT5G08610	12	4	4	4	I	NC	NC	I		NC		NC	NC	250529_at	870.4	1035.7	953.05	P	P	0.000244	0.000244	1551	1435.1	1493.05	P	P	0.000244	0.000244	0.9	0.6	0.9	0.5	0.725	0.206155	I	I	I	I	4	0.3	-0.1	NC	NC	882.4	1096.3	989.35	P	P
250531_at	AT5G08650	12	4	4	4		NC		I	NC	NC		NC	NC	250531_at	2253.3	2591.7	2422.5	P	P	0.000244	0.000732	2945.9	2266.3	2606.1	P	P	0.000244	0.000244	0.5	0.3	0.3	-0.1	0.25	0.251661	I	NC	I	NC	2	0.4	-0.3	MI	NC	1984.3	2023.2	2003.75	P	P
245881_at	AT5G09460	12	4	4	4			NC	I	NC	NC	NC	NC	NC	245881_at	733.1	931.5	832.3	P	P	0.00415	0.001953	1535.2	983.8	1259.5	P	P	0.00293	0.001953	0.5	0.3	0.2	-0.1	0.225	0.25	I	NC	NC	NC	1	0.4	-0.4	NC	D	894.4	750.7	822.55	P	P
250490_at	AT5G09760	12	4	4	4	NC	NC	NC	NC	NC	NC	D	NC	NC	250490_at	1943.1	1834.1	1888.6	P	P	0.000244	0.000244	1786.8	2109.7	1948.25	P	P	0.000244	0.000244	0.1	0.1	0.1	0.1	0.1	0	NC	NC	NC	NC	4	0.1	0.1	NC	NC	1829.1	1747.8	1788.45	P	P
250457_at	AT5G09880	12	4	4	4	NC	NC	NC	I	NC	NC	NC	NC	NC	250457_at	879.2	1024.1	951.65	P	P	0.000244	0.000244	1305.2	1255.8	1280.5	P	P	0.000244	0.000244	0.5	0.5	0.4	0.2	0.4	0.141421	NC	NC	NC	NC	4	0.1	-0.2	NC	NC	829.4	972.2	900.8	P	P
250463_at	AT5G10030	12	4	4	4				I	NC	NC	NC	NC	NC	250463_at	298.4	505.5	401.95	P	P	0.00293	0.000732	665	480.1	572.55	P	P	0.001221	0.001953	0.9	0.3	0.5	-0.2	0.375	0.457347	I	NC	NC	NC	1	0.7	-0.5	I	D	494.8	347.8	421.3	P	P
250434_at	AT5G10390	12	4	4	4	I	NC	NC	NC	NC	NC	NC	NC	NC	250434_at	1884.3	1626.5	1755.4	P	P	0.000244	0.000244	2290.9	2439.8	2365.35	P	P	0.000244	0.000244	0.4	0.4	0.6	0.6	0.5	0.11547	I	I	I	I	4	0.1	0.2	NC	NC	2045.5	2011.7	2028.6	P	P
250433_at	AT5G10400	12	4	4	4	I	NC	NC		NC		NC	NC	NC	250433_at	980.5	940.9	960.7	P	P	0.000244	0.000244	1235.7	1400	1317.85	P	P	0.000732	0.000244	0.5	0.5	0.5	0.6	0.525	0.05	I	I	I	I	4	0	0	NC	NC	1543.6	713.9	1128.75	P	P
250429_at	AT5G10470	12	4	4	4		NC	NC	I	NC	NC	NC	NC	NC	250429_at	1168.5	1145	1156.75	P	P	0.000244	0.000244	1707.3	1386.9	1547.1	P	P	0.000244	0.000244	0.4	0.5	0.1	0.1	0.275	0.206155	I	I	NC	NC	2	0	-0.2	NC	NC	1272.2	1264	1268.1	P	P
250424_at	AT5G10550	12	4	4	4		NC	NC	I	NC	NC		NC	NC	250424_at	1502.6	1542.9	1522.75	P	P	0.000244	0.000244	2147.9	1911.8	2029.85	P	P	0.000244	0.000244	0.5	0.3	0.5	0.3	0.4	0.11547	I	I	I	NC	3	0.1	-0.1	NC	NC	1586.6	1494.6	1540.6	P	P
246019_at	AT5G10690	12	4	4	4		NC	NC	I	NC	NC	NC	NC	NC	246019_at	1196.5	1311.6	1254.05	P	P	0.000732	0.000732	1602.6	1669.6	1636.1	P	P	0.000244	0.000244	0.3	0.1	0.2	0.1	0.175	0.0957427	I	NC	NC	NC	1	0.2	-0.1	NC	NC	1256.9	1253.7	1255.3	P	P
250445_at	AT5G10760	11	4	3	4				D	NC	NC	I		NC	250445_at	594.1	357.1	475.6	P	P	0.008057	0.023926	567.7	974.5	771.1	P	P	0.010742	0.010742	0	0.8	0.6	1.4	0.7	0.57735	NC	I	NC	I	2	-0.9	0.3	D	MI	492.8	581.8	537.3	P	P
250394_at	AT5G10910	12	4	4	4		NC	NC	I	NC	NC	NC	NC	NC	250394_at	557.2	610	583.6	P	P	0.000244	0.000244	729.2	591.4	660.3	P	P	0.000244	0.000244	0.3	0.2	0.2	0.1	0.2	0.0816497	I	NC	NC	NC	1	0.1	-0.2	NC	NC	598.5	504.7	551.6	P	P
250403_at	AT5G10920	12	4	4	4		NC	NC	I	NC	NC		NC	NC	250403_at	1281.2	1762.2	1521.7	P	P	0.001953	0.000732	2038.2	1937.6	1987.9	P	P	0.000244	0.001953	0.5	0.2	0.3	0.1	0.275	0.170783	I	NC	I	NC	2	0.3	-0.2	NC	NC	1476.8	1572.7	1524.75	P	P
250421_at	AT5G11270	12	4	4	4		NC	NC	I	NC	NC	NC	NC	NC	250421_at	1086	1145.5	1115.75	P	P	0.00415	0.00293	1348.5	1213.7	1281.1	P	P	0.00293	0.001953	0.4	0.3	0.3	0.1	0.275	0.125831	I	NC	I	NC	2	0.2	-0.2	NC	NC	1418	1067.2	1242.6	P	P
250368_at	AT5G11280	12	4	4	4		NC	NC	D	NC	NC	NC	NC	NC	250368_at	2853.1	2607.8	2730.45	P	P	0.000244	0.000732	2172.2	2672.8	2422.5	P	P	0.000732	0.000732	-0.3	-0.3	-0.2	-0.1	-0.225	0.0957427	D	D	NC	NC	2	-0.1	0.2	NC	NC	3151.9	3020.6	3086.25	P	P
250365_at	AT5G11410	12	4	4	4		NC	NC			NC	I	NC	NC	250365_at	312.1	320.2	316.15	P	P	0.000244	0.000244	249.1	220.6	234.85	P	P	0.00293	0.000244	-0.9	-0.7	-0.7	-1.1	-0.85	0.191485	D	D	D	NC	3	0.1	0.1	NC	NC	489.9	379.5	434.7	P	P
250366_at	AT5G11420	12	4	4	4	I	NC	NC		NC	NC		NC	NC	250366_at	3280.3	2861.2	3070.75	P	P	0.000244	0.000244	4161.4	4302.4	4231.9	P	P	0.000244	0.000244	0.3	0.5	0.3	0.5	0.4	0.11547	I	I	I	I	4	-0.1	0	NC	NC	3659.8	3424.2	3542	P	P
250385_at	AT5G11520	12	4	4	4		NC	NC	D	NC	NC	NC	NC	NC	250385_at	6542.3	6339.9	6441.1	P	P	0.000244	0.000244	5004.4	5895.6	5450	P	P	0.000244	0.000244	-0.4	-0.4	-0.3	-0.3	-0.35	0.057735	D	D	NC	NC	2	0	0.1	NC	NC	6827.8	7285.2	7056.5	P	P
250358_at	AT5G11740	12	4	4	4	NC	NC	NC	D	NC	NC	NC	NC	NC	250358_at	20931.3	20221.8	20576.5	P	P	0.000244	0.000244	17236.8	19636	18436.4	P	P	0.000244	0.000244	-0.2	-0.2	0	0	-0.1	0.11547	NC	NC	NC	NC	4	0	0.2	NC	NC	22110	22012.3	22061.2	P	P
250334_at	AT5G11770	12	4	4	4				D	NC	NC	NC	NC	NC	250334_at	19977.4	17544.1	18760.8	P	P	0.000244	0.000244	13628.3	17732.5	15680.4	P	P	0.000244	0.000244	-0.6	-0.3	-0.3	0	-0.3	0.244949	D	D	NC	NC	2	-0.3	0.3	D	I	16958.5	19012.6	17985.5	P	P
250337_at	AT5G11790	12	4	4	4	I	NC	NC		NC	NC	NC	NC	NC	250337_at	1308.9	1329.3	1319.1	P	P	0.000244	0.000244	2364.3	2004.6	2184.45	P	P	0.000244	0.000244	0.5	0.3	0.4	0.4	0.4	0.0816497	I	I	I	I	4	0.1	0	NC	NC	1593.9	1504.7	1549.3	P	P
250301_at	AT5G11970	12	4	4	4	NC	NC	NC		NC	NC	I	NC	NC	250301_at	597.5	502.3	549.9	P	P	0.010742	0.023926	466.9	588.9	527.9	P	P	0.023926	0.008057	-0.3	-0.1	0.1	0.3	-1.38778e-17	0.258199	NC	NC	NC	NC	4	-0.2	0.4	NC	NC	631.9	612.7	622.3	P	P
250304_at	AT5G12110	12	4	4	4		NC		I	NC	NC	I	NC	NC	250304_at	1486.9	1932.1	1709.5	P	P	0.008057	0.00293	1797.1	1736.6	1766.85	P	P	0.005859	0.001953	0.5	0.2	0.5	0.2	0.35	0.173205	I	NC	I	NC	2	0.3	-0.2	I	NC	1391.4	1669.3	1530.35	P	P
250306_at	AT5G12160	12	4	4	4		NC	NC	D	NC	NC		NC	NC	250306_at	670.7	586.6	628.65	P	P	0.000244	0.000244	427.4	484.8	456.1	P	P	0.00415	0.000244	-0.6	-0.5	-0.2	-0.5	-0.45	0.173205	D	D	NC	NC	2	0	0.2	NC	NC	701.7	676.1	688.9	P	P
250307_at	AT5G12170	12	4	4	4			NC	D	NC	NC		NC	NC	250307_at	2562.6	2488.9	2525.75	P	P	0.000244	0.000244	1769	2359.7	2064.35	P	P	0.000244	0.000244	-0.5	-0.4	-0.2	-0.1	-0.3	0.182574	D	D	NC	NC	2	-0.1	0.3	NC	I	2592.8	2737.8	2665.3	P	P
250318_at	AT5G12200	12	4	4	4	NC	NC	NC	NC	NC	NC	I	NC	NC	250318_at	1662.8	1837.8	1750.3	P	P	0.000732	0.001221	1798.1	1667.9	1733	P	P	0.001953	0.000732	-0.1	0	0.1	0.1	0.025	0.0957427	NC	NC	NC	NC	4	0	0.1	NC	NC	1640	1557	1598.5	P	P
250310_at	AT5G12230	12	4	4	4	NC	NC	NC	I	NC	NC	NC	NC	NC	250310_at	563.2	588.2	575.7	P	P	0.000244	0.000244	662.1	544.1	603.1	P	P	0.000244	0.000244	0.2	0.3	0.1	0	0.15	0.129099	NC	NC	NC	NC	4	0.2	-0.1	NC	NC	434.2	420	427.1	P	P
245155_at	AT5G12470	12	4	4	4	NC	NC	NC		NC	NC	D	NC	NC	245155_at	4460.5	4304.9	4382.7	P	P	0.000244	0.000244	4680.6	4384.9	4532.75	P	P	0.000244	0.000244	0.1	0.1	0	0	0.05	0.057735	NC	NC	NC	NC	4	0	-0.1	NC	NC	4361.6	5021.5	4691.55	P	P
250278_at	AT5G12860	12	4	4	4	NC	NC	NC	NC		NC	D	NC	NC	250278_at	22334.6	21180.2	21757.4	P	P	0.000244	0.000244	20828.5	20102.9	20465.7	P	P	0.000244	0.000244	-0.2	0	-0.2	-0.1	-0.125	0.0957427	NC	NC	NC	NC	4	-0.1	0	NC	NC	19971.7	25302.3	22637	P	P
250265_at	AT5G12900	12	4	4	4		NC	NC	I	NC	NC	NC	NC	NC	250265_at	185	253.2	219.1	P	P	0.005859	0.01416	286.8	313.7	300.25	P	P	0.00415	0.001953	0.6	0.3	0.5	0.1	0.375	0.221736	NC	NC	I	NC	3	0.4	0	NC	NC	233.4	214.8	224.1	P	P
250272_at	AT5G13000	12	4	4	4		NC	NC	I	NC	NC		NC	NC	250272_at	3163.8	3284.9	3224.35	P	P	0.000732	0.000732	3531	3201.8	3366.4	P	P	0.000244	0.000244	0.3	0.2	0.3	0.2	0.25	0.057735	I	NC	I	NC	2	0.1	-0.1	NC	NC	2688.2	2864.5	2776.35	P	P
245982_at	AT5G13170	9	4	3	2			NC	D	NC	NC	I		NC	245982_at	621.1	650.1	635.6	P	P	0.001953	0.001221	677.5	433.3	555.4	P	P	0.00293	0.030273	0.1	0.2	-0.7	-0.6	-0.25	0.465475	NC	NC	D	D	2	0	-0.8	NC	D	868	1108.7	988.35	P	P
250279_at	AT5G13200	12	4	4	4	NC	NC		D	NC	NC	I	NC	NC	250279_at	908.8	1003.1	955.95	P	P	0.00293	0.010742	1023.3	799.6	911.45	P	P	0.00415	0.001953	-0.3	0.2	-0.4	0.2	-0.075	0.320156	NC	NC	NC	NC	4	-0.4	0	D	NC	932.6	1130.7	1031.65	P	P
250287_at	AT5G13330	12	4	4	4	D	NC	NC			NC	I	NC	NC	250287_at	866.9	770.8	818.85	P	P	0.005859	0.001953	362.7	598.7	480.7	P	P	0.030273	0.00415	-0.9	-0.9	-0.7	-0.5	-0.75	0.191485	D	D	D	D	4	-0.1	0.4	NC	NC	927.7	942.5	935.1	P	P
250234_at	AT5G13420	12	4	4	4			NC	D	NC	NC		NC	NC	250234_at	7959.3	7346.2	7652.75	P	P	0.000244	0.000732	6196.2	7282.1	6739.15	P	P	0.000244	0.000732	-0.3	-0.3	-0.2	-0.1	-0.225	0.0957427	D	D	NC	NC	2	-0.1	0.2	NC	I	7257.9	8840.8	8049.35	P	P
245849_at	AT5G13520	12	4	4	4		NC	NC	I	NC	NC	NC	NC	NC	245849_at	388.1	463.3	425.7	P	P	0.037598	0.037598	494.6	619.1	556.85	P	P	0.008057	0.005859	0.7	0.4	0.5	0.3	0.475	0.170783	I	NC	I	NC	2	0.3	-0.1	NC	NC	371.2	402.4	386.8	P	P
250237_at	AT5G13560	12	4	4	4	NC	NC	NC	I	NC	NC	NC	NC	NC	250237_at	820.3	861.5	840.9	P	P	0.000732	0.001953	866.2	870.9	868.55	P	P	0.000244	0.000244	0.3	-0.1	0.1	-0.1	0.05	0.191485	NC	NC	NC	NC	4	0.1	-0.1	NC	NC	602.2	717.1	659.65	P	P
250243_at	AT5G13630	12	4	4	4	NC		NC		NC	NC	D	NC	NC	250243_at	17040.1	17727	17383.5	P	P	0.000244	0.000244	21096.2	16431.8	18764	P	P	0.000244	0.000244	0.2	0.2	-0.1	-0.1	0.05	0.173205	NC	NC	NC	NC	4	0	-0.3	NC	D	15849.9	18281.6	17065.8	P	P
250256_at	AT5G13650	12	4	4	4		NC	NC	I	NC	NC	NC	NC	NC	250256_at	4346.6	4811.3	4578.95	P	P	0.000244	0.000244	5496.8	4828.3	5162.55	P	P	0.000244	0.000244	0.3	0.2	0.1	0	0.15	0.129099	I	NC	NC	NC	1	0.1	-0.2	NC	NC	4100.7	4040.4	4070.55	P	P
250255_at	AT5G13730	12	4	4	4	NC	NC	NC	I	NC	NC		NC	NC	250255_at	931.8	1031.4	981.6	P	P	0.001221	0.001221	962.5	985.5	974	P	P	0.001221	0.001221	0.1	-0.1	0.1	0	0.025	0.0957427	NC	NC	NC	NC	4	0.2	0.1	NC	NC	961.1	699.9	830.5	P	P
250257_at	AT5G13770	12	4	4	4			NC	I	NC	NC		NC	NC	250257_at	1691.1	1734.7	1712.9	P	P	0.000244	0.000244	2754	1973.8	2363.9	P	P	0.000244	0.000244	0.7	0.5	0.1	0.1	0.35	0.3	I	I	NC	NC	2	0.1	-0.4	NC	D	1761.6	1749.1	1755.35	P	P
250203_at	AT5G13980	12	4	4	4		NC	NC	I	NC	NC	NC	NC	NC	250203_at	1861.5	1959.3	1910.4	P	P	0.000244	0.000244	2405.9	2188.4	2297.15	P	P	0.000244	0.000244	0.4	0.3	0.2	0.1	0.25	0.129099	I	I	NC	NC	2	0	-0.2	NC	NC	1601.3	1758.4	1679.85	P	P
250222_at	AT5G14050	12	4	4	4		NC	NC	I	NC	NC		NC	NC	250222_at	1205.6	1165.7	1185.65	P	P	0.000732	0.000244	1754.1	1425.4	1589.75	P	P	0.000244	0.000244	0.5	0.4	0.2	0.3	0.35	0.129099	I	I	NC	NC	2	0	-0.2	NC	NC	974.1	1198.4	1086.25	P	P
250217_at	AT5G14130;AT5G14120	12	4	4	4		NC	NC	NC	NC	NC	D	NC	NC	250217_at	8452.5	7883.9	8168.2	P	P	0.000244	0.000244	6953.4	5823.4	6388.4	P	P	0.000732	0.000732	-0.3	-0.2	-0.5	-0.4	-0.35	0.129099	D	NC	D	D	3	-0.1	-0.2	NC	NC	7727.8	6772.3	7250.05	P	P
250170_at	AT5G14260	12	4	4	4		NC	NC	I	NC	NC		NC	NC	250170_at	3097.8	3220.3	3159.05	P	P	0.000732	0.001221	3903.6	4216.9	4060.25	P	P	0.000244	0.000244	0.3	0.2	0.2	0.2	0.225	0.05	I	NC	I	NC	2	0	0.1	NC	NC	3944.2	3809.9	3877.05	P	P
250179_at	AT5G14440	12	4	4	4	NC	NC	NC	I	NC	NC		NC	NC	250179_at	1007.3	913.3	960.3	P	P	0.008057	0.010742	1103.2	1062.6	1082.9	P	P	0.00415	0.00415	0.2	0.2	0.3	0.2	0.225	0.05	NC	NC	NC	NC	4	0.2	0	NC	NC	875.4	1165.2	1020.3	P	P
250142_at	AT5G14650	12	4	4	4		NC	NC		NC	NC	D	NC	NC	250142_at	270.6	219.1	244.85	P	P	0.001221	0.000244	222.8	432.5	327.65	P	P	0.000244	0.000732	-0.1	0	0.5	0.5	0.225	0.320156	NC	NC	NC	I	3	-0.1	0.5	NC	NC	246.5	285.5	266	P	P
246583_at	AT5G14720	12	4	4	4		NC	NC	I	NC	NC	NC	NC	NC	246583_at	610.6	504.5	557.55	P	P	0.00293	0.00293	629	554.5	591.75	P	P	0.000732	0.000732	0.2	0.4	0.2	0.4	0.3	0.11547	I	NC	NC	NC	1	-0.2	0	NC	NC	374.1	449.8	411.95	P	P
246584_at	AT5G14730	12	4	4	4		NC	NC	D	NC	NC	NC	NC	NC	246584_at	1250.2	1034.2	1142.2	P	P	0.000732	0.000732	692	642.3	667.15	P	P	0.00293	0.00293	-0.6	-0.5	-0.4	-0.4	-0.475	0.0957427	D	D	NC	NC	2	-0.2	0.2	NC	NC	1241.9	1027.6	1134.75	P	P
246562_at	AT5G15580	12	4	4	4		NC	NC	I	NC	NC	NC	NC	NC	246562_at	382.7	369.8	376.25	P	P	0.000244	0.000732	594	398.9	496.45	P	P	0.000244	0.000244	0.7	0.7	0.4	0.4	0.55	0.173205	I	MI	MI	NC	1	0	-0.1	NC	NC	310.4	318.5	314.45	P	P
246564_at	AT5G15610	12	4	4	4		NC		I	NC	NC	NC	NC	NC	246564_at	1271.3	1742.6	1506.95	P	P	0.00415	0.001953	1712.9	1414.2	1563.55	P	P	0.001953	0.00293	0.5	0.2	0.3	-0.1	0.225	0.25	I	NC	I	NC	2	0.3	-0.3	I	NC	1092.8	1145.5	1119.15	P	P
246516_at	AT5G15740	12	4	4	4	NC	NC	NC	I	NC	NC	NC	NC	NC	246516_at	768.8	723.3	746.05	P	P	0.000732	0.000732	853.3	831.1	842.2	P	P	0.001221	0.001221	0	0.1	0.1	-0.1	0.025	0.0957427	NC	NC	NC	NC	4	0.1	0	NC	NC	677	654.6	665.8	P	P
246523_at	AT5G15850	12	4	4	4			NC	NC	NC	NC	D	NC	NC	246523_at	1837.3	2004.5	1920.9	P	P	0.001221	0.000732	1963.9	1174.7	1569.3	P	P	0.000732	0.000732	0.1	0.1	-0.8	-0.7	-0.325	0.492443	NC	NC	D	D	2	0	-0.8	NC	D	1610.9	1434.4	1522.65	P	P
246483_at	AT5G16000	12	4	4	4	I	NC	NC		NC	NC		NC	NC	246483_at	530	672.6	601.3	P	P	0.001221	0.001221	889.2	863.4	876.3	P	P	0.000244	0.000244	0.6	0.6	0.8	0.5	0.625	0.125831	I	I	I	I	4	0.2	0	NC	NC	617.2	616.4	616.8	P	P
246487_at	AT5G16030	12	4	4	4				I	NC		D	NC	NC	246487_at	1768.3	2383.3	2075.8	P	P	0.000732	0.000244	4053.6	2650.1	3351.85	P	P	0.000244	0.000244	1.1	0.7	0.5	0.2	0.625	0.377492	I	I	I	NC	3	0.4	-0.6	I	D	2419.7	1841.8	2130.75	P	P
246492_at	AT5G16140	12	4	4	4	NC	NC	NC	I	NC	NC	NC	NC	NC	246492_at	661.9	633.5	647.7	P	P	0.001953	0.000244	920.6	621.8	771.2	P	P	0.001221	0.000244	0.2	0.4	0	0.3	0.225	0.170783	NC	NC	NC	NC	4	-0.1	-0.3	NC	NC	662.6	606.7	634.65	P	P
246500_at	AT5G16270	12	4	4	4		NC	NC	I	NC	NC	NC	NC	NC	246500_at	527.7	659.1	593.4	P	P	0.005859	0.005859	800.1	710.2	755.15	P	P	0.00415	0.001953	0.7	0.3	0.6	0.3	0.475	0.206155	I	NC	I	NC	2	0.2	0.1	NC	NC	686.8	725.5	706.15	P	P
250114_s_at	AT5G16340	12	4	4	4	D	NC	NC	D		NC	I	NC	NC	250114_s_at	2302.1	1600.1	1951.1	P	P	0.000244	0.000244	1063.4	1140.3	1101.85	P	P	0.001221	0.000732	-1	-0.7	-0.8	-0.6	-0.775	0.170783	D	D	D	D	4	-0.2	0.1	NC	NC	1779	1604.5	1691.75	P	P
250100_at	AT5G16570	12	4	4	4	I	NC	NC	D	NC	NC	D	NC	NC	250100_at	636.8	500.5	568.65	P	P	0.000244	0.000244	1018	996.3	1007.15	P	P	0.000244	0.000244	0.6	0.8	0.6	1.1	0.775	0.236291	I	I	I	I	4	-0.2	0.1	NC	NC	764.5	882.8	823.65	P	P
250104_at	AT5G16610	12	4	4	4		NC	NC	I	NC	NC	NC	NC	NC	250104_at	252.7	344.1	298.4	P	P	0.010742	0.001953	444.3	320.2	382.25	P	P	0.000732	0.000244	0.7	0.1	0	-0.1	0.175	0.359398	I	NC	NC	NC	1	0.3	-0.3	NC	NC	245.7	278.2	261.95	P	P
250080_at	AT5G16620	12	4	4	4	NC	NC	NC	I	NC	NC	NC	NC	NC	250080_at	1826.6	2223.8	2025.2	P	P	0.000732	0.000732	2388.7	1967.7	2178.2	P	P	0.000244	0.000244	0.3	0.2	0.1	0	0.15	0.129099	NC	NC	NC	NC	4	0.1	0	NC	NC	1560.9	2026.4	1793.65	P	P
246509_at	AT5G16715	12	4	4	4		NC	NC	I	NC	NC	NC	NC	NC	246509_at	1130.5	1277	1203.75	P	P	0.005859	0.008057	1568.2	1413.7	1490.95	P	P	0.00293	0.001221	0.5	0.4	0.3	0.3	0.375	0.0957427	I	I	I	NC	3	0	-0.1	NC	NC	1084	969.1	1026.55	P	P
246447_at	AT5G16780	12	4	4	4		NC	NC	I	NC	NC	NC	NC	NC	246447_at	393.4	518.1	455.75	P	P	0.023926	0.023926	757.8	642	699.9	P	P	0.023926	0.023926	0.6	0.5	0.5	0.4	0.5	0.0816497	MI	MI	I	I	2	0.3	-0.1	NC	NC	500.2	519.6	509.9	P	P
246463_at	AT5G16970	12	4	4	4	D	NC	NC		NC	NC	NC	NC	NC	246463_at	2586.7	3505.9	3046.3	P	P	0.000488	0.001465	1973.5	1942.4	1957.95	P	P	0.011719	0.000488	-0.6	-0.7	-0.4	-0.5	-0.55	0.129099	D	D	D	D	4	0.2	0.1	NC	NC	2970.8	2973.1	2971.95	P	P
246424_at	AT5G17020	12	4	4	4		NC	NC	I	NC	NC	NC	NC	NC	246424_at	1203.2	1287.4	1245.3	P	P	0.000732	0.000732	1585.7	1338.9	1462.3	P	P	0.000732	0.000732	0.3	0.3	0.1	-0.1	0.15	0.191485	I	NC	NC	NC	1	0.1	-0.2	NC	NC	1268.7	1463.9	1366.3	P	P
250096_at	AT5G17190	12	4	4	4			NC	D	NC	NC	NC	NC	NC	250096_at	4401.1	4437.6	4419.35	P	P	0.000244	0.000244	2865.5	3599.4	3232.45	P	P	0.000244	0.000244	-0.6	-0.5	-0.4	-0.2	-0.425	0.170783	D	D	NC	NC	2	-0.2	0.3	NC	I	4908.5	4858.8	4883.65	P	P
250095_at	AT5G17230	12	4	4	4		NC	NC	I	NC	NC		NC	NC	250095_at	4940	5566.8	5253.4	P	P	0.000244	0.000244	7018.5	5640.4	6329.45	P	P	0.000244	0.000244	0.5	0.4	0.2	0.2	0.325	0.15	I	I	I	NC	3	0.1	-0.2	NC	NC	5087.1	4438.8	4762.95	P	P
250074_at	AT5G17310	12	4	4	4		NC	NC	I	NC	NC			NC	250074_at	2673.8	3105.9	2889.85	P	P	0.000244	0.000244	3585.2	2901.8	3243.5	P	P	0.000244	0.000244	0.4	0.2	0.2	-0.1	0.175	0.206155	I	NC	NC	NC	1	0.2	-0.2	NC	NC	3056.9	2664.2	2860.55	P	P
250094_at	AT5G17380	12	4	4	4		NC	NC	D	NC	NC	NC	NC	NC	250094_at	5670.6	6125	5897.8	P	P	0.000244	0.000244	4121.8	3962.6	4042.2	P	P	0.000244	0.000244	-0.3	-0.2	-0.3	-0.3	-0.275	0.05	D	D	D	MD	3	-0.1	-0.1	NC	NC	5119	5423.6	5271.3	P	P
250075_at	AT5G17670	12	4	4	4	NC	NC	NC	NC	NC	NC	D	NC	NC	250075_at	1052	1098.4	1075.2	P	P	0.001953	0.001221	1360.4	1173.8	1267.1	P	P	0.001953	0.001953	0.3	0.1	-0.1	-0.1	0.05	0.191485	NC	NC	NC	NC	4	0.1	-0.3	NC	NC	1333.2	1266.9	1300.05	P	P
250060_at	AT5G17690	12	4	4	4	NC	NC	NC	I	NC	NC	NC	NC	NC	250060_at	402.6	407.6	405.1	P	P	0.00415	0.00293	529.9	476	502.95	P	P	0.008057	0.001221	0.5	0.4	0.2	0.2	0.325	0.15	NC	NC	NC	NC	4	0	-0.1	NC	NC	386.6	356.5	371.55	P	P
250045_at	AT5G17700	12	4	4	4	NC	NC	NC		NC	NC	I	NC	NC	250045_at	457.1	514.6	485.85	P	P	0.005859	0.010742	768.9	625.1	697	P	P	0.001953	0.00415	0.3	0.3	0.1	0.1	0.2	0.11547	NC	NC	NC	NC	4	-0.1	-0.3	NC	NC	459.3	507.6	483.45	P	P
250062_at	AT5G17760	12	4	4	4		NC	NC	D	NC	NC		NC	NC	250062_at	970.6	1015.4	993	P	P	0.000244	0.000244	729.6	893.5	811.55	P	P	0.000244	0.000244	-0.7	-0.8	-0.4	-0.4	-0.575	0.206155	D	D	NC	NC	2	0.1	0.3	NC	NC	986.3	1111.8	1049.05	P	P
250059_at	AT5G17820	12	4	4	4			NC	D	NC	NC	NC	NC	NC	250059_at	2380.6	2188.4	2284.5	P	P	0.000732	0.001953	1362.2	2667.2	2014.7	P	P	0.001953	0.000732	-0.6	-0.6	-0.1	0.2	-0.275	0.394757	D	D	NC	NC	2	-0.2	0.6	NC	I	2295.4	2466.9	2381.15	P	P
250054_at	AT5G17860	12	4	4	4	D		NC	D			I	NC	NC	250054_at	3499	3259.5	3379.25	P	P	0.000244	0.000244	1572.7	2529.3	2051	P	P	0.000732	0.001221	-1.2	-1	-0.5	-0.5	-0.8	0.355903	D	D	D	D	4	-0.2	0.6	NC	I	3212.9	3567.9	3390.4	P	P
250066_at	AT5G17930	12	4	4	4		NC		I	NC	NC	NC	NC	NC	250066_at	446.5	613.8	530.15	P	P	0.000244	0.000244	647.6	547.9	597.75	P	P	0.000244	0.000244	0.8	0.3	0.2	0	0.325	0.340343	I	NC	I	NC	2	0.4	-0.3	I	NC	452.5	451.9	452.2	P	P
250016_at	AT5G18100	12	4	4	4		NC	NC	I	NC	NC	NC	NC	NC	250016_at	1245.4	1221.5	1233.45	P	P	0.008057	0.00293	1246.7	1193.7	1220.2	P	P	0.001953	0.001953	0.3	0.2	0.2	0	0.175	0.125831	I	NC	I	NC	2	0.2	-0.1	NC	NC	1183.4	1229.7	1206.55	P	P
249983_at	AT5G18470	12	4	4	4		NC	NC	D	NC	NC			NC	249983_at	1013.5	764.1	888.8	P	P	0.000244	0.000244	589.6	602.8	596.2	P	P	0.000244	0.000244	-0.8	-0.3	-0.6	0	-0.425	0.35	D	NC	D	NC	2	-0.4	0.1	NC	NC	889.9	939.4	914.65	P	P
249985_at	AT5G18500	12	4	4	4	I	NC	NC		NC	NC	NC	NC	NC	249985_at	1288.5	1499.1	1393.8	P	P	0.000244	0.000244	1896	1673.5	1784.75	P	P	0.000244	0.000244	0.5	0.3	0.4	0.3	0.375	0.0957427	I	I	I	I	4	0	-0.1	NC	NC	1441.9	1359	1400.45	P	P
249993_at	AT5G18570	12	4	4	4		NC	NC	I	NC	NC		NC	NC	249993_at	842.2	983.7	912.95	P	P	0.00293	0.00415	1202.9	1122.7	1162.8	P	P	0.001221	0.001953	0.5	0.4	0.5	0.1	0.375	0.189297	I	NC	I	NC	2	0.3	-0.2	NC	NC	912.2	869.3	890.75	P	P
249997_at	AT5G18620	12	4	4	4	I	NC	NC	I	NC	NC		NC	NC	249997_at	580.1	489.3	534.7	P	P	0.000244	0.000244	1066	888.7	977.35	P	P	0.000244	0.000732	0.6	0.8	0.6	0.7	0.675	0.0957427	I	I	I	I	4	0	-0.1	NC	NC	520.5	629.6	575.05	P	P
250006_at	AT5G18660	12	4	4	4		NC	NC	I	NC	NC	NC	NC	NC	250006_at	2557.6	2902	2729.8	P	P	0.000244	0.000244	3168.8	3252.6	3210.7	P	P	0.000244	0.000244	0.4	0.1	0.3	0.2	0.25	0.129099	I	NC	I	NC	2	0.2	0	NC	NC	3340.6	2555.1	2947.85	P	P
250007_at	AT5G18670	12	4	4	4	D	NC	NC	D	NC	NC	D	NC	NC	250007_at	1863.3	2330.4	2096.85	P	P	0.000244	0.000732	1706.1	1554.9	1630.5	P	P	0.001221	0.001221	-0.5	-0.3	-0.8	-0.7	-0.575	0.221736	D	D	D	D	4	-0.1	-0.3	NC	NC	2244.1	1990.6	2117.35	P	P
249923_at	AT5G19120;AT5G19130	12	4	4	4	D	NC	NC	D	NC	NC	D		NC	249923_at	6038.1	5781.7	5909.9	P	P	0.023926	0.023926	1955.2	2168.5	2061.85	P	P	0.030273	0.023926	-1.6	-1.4	-1.5	-1.3	-1.45	0.129099	D	D	D	D	4	-0.1	0.1	NC	NC	4235.1	4370.5	4302.8	P	P
249927_at	AT5G19220	12	4	4	4		NC		I		NC	D	NC	NC	249927_at	2389.2	2818.9	2604.05	P	P	0.001953	0.001221	3537.1	2913	3225.05	P	P	0.001953	0.001953	0.6	0.3	0.2	0	0.275	0.25	I	I	I	NC	3	0.3	-0.4	I	NC	2415.7	2630.3	2523	P	P
249918_at	AT5G19240	12	4	4	4		NC		D	NC	NC		NC	NC	249918_at	4898.6	3627.9	4263.25	P	P	0.000244	0.000244	3750.3	3665.4	3707.85	P	P	0.000244	0.000244	-0.3	0.1	-0.4	0	-0.15	0.238048	D	NC	D	NC	2	-0.4	-0.1	D	NC	4451	4556.1	4503.55	P	P
249919_at	AT5G19250	12	4	4	4		NC		D	NC	NC		NC	NC	249919_at	9609	7385	8497	P	P	0.000244	0.000244	7114.1	8408.4	7761.25	P	P	0.000244	0.000244	-0.4	0	-0.3	0.1	-0.15	0.238048	D	NC	NC	NC	1	-0.4	0.2	D	NC	8869.6	9822.9	9346.25	P	P
249920_at	AT5G19260	9	3	3	3	NC	NC	NC	NC	NC	NC	D	NC	NC	249920_at	375.8	546.7	461.25	A	P	0.129639	0.037598	552.3	449.1	500.7	P	P	0.046143	0.01416	0.2	-0.1	0.1	-0.5	-0.075	0.30957	NC	NC	NC	NC	4	0.5	-0.2	NC	NC	444.4	429.2	436.8	P	P
246125_at	AT5G19875	12	4	4	4	NC	NC	NC		NC	NC	I	NC	NC	246125_at	923.1	937.8	930.45	P	P	0.000244	0.000732	939.1	788.9	864	P	P	0.000732	0.000244	-0.1	0	-0.2	0	-0.075	0.0957427	NC	NC	NC	NC	4	-0.1	0.1	NC	NC	953.2	905.3	929.25	P	P
246149_at	AT5G19890	12	4	4	4	D	NC	NC	D	NC	NC		NC	NC	246149_at	2009.6	1959.2	1984.4	P	P	0.000244	0.000244	975.3	1182.6	1078.95	P	P	0.000244	0.000244	-0.9	-0.8	-0.6	-0.5	-0.7	0.182574	D	D	D	D	4	-0.1	0.3	NC	NC	2382.7	2189.2	2285.95	P	P
246154_at	AT5G19940	12	4	4	4	NC	NC	NC	NC	NC	NC	D	NC	NC	246154_at	5507.6	5659.3	5583.45	P	P	0.000244	0.000244	6867.7	6022	6444.85	P	P	0.000244	0.000244	0.3	0.3	0.2	0.2	0.25	0.057735	NC	NC	NC	NC	4	0	-0.2	NC	NC	6510.9	6031	6270.95	P	P
246143_at	AT5G19980	12	4	4	4		NC	NC	D	NC	NC		NC	NC	246143_at	2225.8	1869.5	2047.65	P	P	0.000244	0.000244	1512.7	2249.2	1880.95	P	P	0.000244	0.000244	-0.4	-0.2	-0.1	-0.1	-0.2	0.141421	D	NC	NC	NC	1	-0.1	0.2	NC	NC	1953.5	2991.8	2472.65	P	P
246124_at	AT5G20060	12	4	4	4	NC	NC	NC	NC	NC	NC	D	NC	NC	246124_at	3241.3	3139	3190.15	P	P	0.000244	0.000244	3264	3037.4	3150.7	P	P	0.000244	0.000244	0	0	0	0	0	0	NC	NC	NC	NC	4	0	0	NC	NC	2997.6	3231.5	3114.55	P	P
246110_at	AT5G20140	12	4	4	4		NC	NC	I	NC	NC	NC	NC	NC	246110_at	690.8	675.6	683.2	P	P	0.005859	0.00415	981.7	691.1	836.4	P	P	0.001953	0.00293	0.5	0.4	0.1	-0.1	0.225	0.275379	I	NC	NC	NC	1	0.2	-0.4	NC	NC	764.6	627.7	696.15	P	P
246073_at	AT5G20180	12	4	4	4		NC	NC	D	NC	NC	NC	NC	NC	246073_at	3683.8	3135.8	3409.8	P	P	0.000244	0.000244	2818.6	3077.2	2947.9	P	P	0.000244	0.000244	-0.4	-0.2	-0.1	0	-0.175	0.170783	D	NC	NC	NC	1	-0.2	0.2	NC	NC	3876.8	3728.2	3802.5	P	P
246099_at	AT5G20230	12	4	4	4	D					NC	I	NC	NC	246099_at	1648.7	1787.8	1718.25	P	P	0.000244	0.000244	896.5	482.6	689.55	P	P	0.000732	0.001221	-0.5	-1.1	-1.2	-1.7	-1.125	0.492443	D	D	D	D	4	0.7	-0.7	I	D	1090.6	960.5	1025.55	P	P
246114_at	AT5G20250	12	4	4	4	D	NC	NC			NC	D	NC	NC	246114_at	10079.8	8699.7	9389.75	P	P	0.000244	0.000244	4464.6	4719.5	4592.05	P	P	0.000244	0.000244	-1	-0.9	-0.9	-0.8	-0.9	0.0816497	D	D	D	D	4	0	0.1	NC	NC	7450.4	6151.2	6800.8	P	P
245999_at	AT5G20650	12	4	4	4		NC		D	NC	NC	NC	NC	NC	245999_at	10379	8473.6	9426.3	P	P	0.000244	0.000244	7433.2	9064.7	8248.95	P	P	0.000244	0.000244	-0.4	-0.2	-0.3	0	-0.225	0.170783	D	D	NC	NC	2	-0.3	0.2	D	NC	9385.2	9471.6	9428.4	P	P
246180_at	AT5G20840	12	4	4	4		NC	NC	I	NC	NC	NC	NC	NC	246180_at	499.5	715.1	607.3	P	P	0.005859	0.005859	747.2	553.3	650.25	P	P	0.00415	0.005859	0.2	0.1	0	-0.2	0.025	0.170783	MI	NC	NC	NC	1	0.1	-0.3	NC	NC	571.4	603.5	587.45	P	P
246161_at	AT5G20900	12	4	4	4	NC	NC	NC		NC	NC	I	NC	NC	246161_at	3238.7	3221	3229.85	P	P	0.000244	0.000244	3184.8	3135	3159.9	P	P	0.000244	0.000244	-0.1	-0.1	-0.1	-0.1	-0.1	0	NC	NC	NC	NC	4	0	0	NC	NC	3362.9	3234.4	3298.65	P	P
246030_at	AT5G21105	12	4	4	4	D		NC		NC	NC	I	NC	NC	246030_at	3679	3583.2	3631.1	P	P	0.000244	0.000244	2320.9	2973.8	2647.35	P	P	0.001221	0.000244	-0.6	-0.6	-0.2	-0.3	-0.425	0.206155	D	D	D	D	4	-0.1	0.3	NC	I	3143.7	3992	3567.85	P	P
249929_at	AT5G22340	12	4	4	4		NC		I	NC	NC		NC	NC	249929_at	1379.7	1783.7	1581.7	P	P	0.000732	0.000244	2053.6	1689.9	1871.75	P	P	0.000732	0.000244	0.5	0.1	0.4	0	0.25	0.238048	I	NC	I	NC	2	0.3	-0.1	I	NC	1295.6	1466.7	1381.15	P	P
249932_at	AT5G22390	10	3	4	3		NC	NC	NC	NC	NC	D	NC	NC	249932_at	129.5	303.7	216.6	M	P	0.056152	0.005859	396.8	358.2	377.5	P	P	0.005859	0.005859	0.7	0.2	0.8	0	0.425	0.386221	I	NC	NC	NC	1	0.3	-0.3	NC	NC	329.8	254.5	292.15	P	P
249917_at	AT5G22460	12	4	4	4			NC	D		NC	I	NC	NC	249917_at	1130.3	988.7	1059.5	P	P	0.00293	0.010742	435.3	739.3	587.3	P	P	0.023926	0.010742	-1.2	-1	-0.6	-0.2	-0.75	0.443471	D	D	D	NC	3	-0.3	1	NC	I	1181.6	1043.6	1112.6	P	P
249899_at	AT5G22620	12	4	4	4		NC	NC	I	NC	NC		NC	NC	249899_at	2322.5	1924.1	2123.3	P	P	0.001953	0.001953	2313.5	2270.7	2292.1	P	P	0.001221	0.000732	0.5	0.3	0.2	0.1	0.275	0.170783	I	I	NC	NC	2	0.1	-0.1	NC	NC	1734.7	1724.4	1729.55	P	P
249900_at	AT5G22640	12	4	4	4		NC	NC	I	NC	NC	NC	NC	NC	249900_at	1864.6	2268.1	2066.35	P	P	0.000732	0.001953	2582.9	2567.9	2575.4	P	P	0.001221	0.001221	0.5	0.3	0.2	0.1	0.275	0.170783	I	I	NC	NC	2	0.2	-0.3	NC	NC	1938.7	1749.8	1844.25	P	P
249904_at	AT5G22700	12	4	4	4		NC	NC	I	NC	NC	NC	NC	NC	249904_at	152.4	249.1	200.75	P	P	0.046143	0.030273	345.7	254.1	299.9	P	P	0.030273	0.023926	0.6	0.3	0.4	-0.2	0.275	0.340343	I	NC	NC	NC	1	0.8	-0.5	NC	NC	160.8	209.2	185	P	P
249908_at	AT5G22760	12	4	4	4		NC		I	NC	NC	NC	NC	NC	249908_at	370.8	603.4	487.1	P	P	0.008057	0.001221	739.9	540.9	640.4	P	P	0.001221	0.00293	0.8	0.2	0.4	-0.1	0.325	0.377492	I	NC	I	NC	2	0.5	-0.3	I	NC	437.3	525.7	481.5	P	P
249916_at	AT5G22880	12	4	4	4	I	NC	NC	I	NC	NC	NC	NC	NC	249916_at	562.3	545.4	553.85	P	P	0.000244	0.000244	798.2	1031.1	914.65	P	P	0.000244	0.000244	0.7	0.6	0.9	0.9	0.775	0.15	I	I	I	I	4	0.1	0.2	NC	NC	613.4	763	688.2	P	P
249862_at	AT5G22920	12	4	4	4	D	NC	NC		NC		D	NC		249862_at	4131.8	4302.2	4217	P	P	0.000732	0.000732	2621.1	2587.6	2604.35	P	P	0.001221	0.000732	-0.6	-0.7	-0.7	-0.8	-0.7	0.0816497	D	D	D	D	4	0.1	-0.1	NC	NC	4231	3324.9	3777.95	P	P
249826_at	AT5G23310	12	4	4	4		NC	NC	I	NC	NC	NC	NC	NC	249826_at	1490.5	2005.1	1747.8	P	P	0.000244	0.000732	1938	2112.4	2025.2	P	P	0.000244	0.000244	0.4	0.1	0.3	0.1	0.225	0.15	I	NC	I	NC	2	0.2	-0.1	NC	NC	1733.3	1826.2	1779.75	P	P
249800_at	AT5G23660	12	4	4	4		NC	NC	D	NC	NC		NC		249800_at	2755.8	2697.6	2726.7	P	P	0.000732	0.000732	2205.6	2315.5	2260.55	P	P	0.001221	0.000732	-0.3	-0.2	-0.3	-0.3	-0.275	0.05	D	D	NC	NC	2	0	0	NC	NC	2672.8	2938.5	2805.65	P	P
249817_at	AT5G23820	12	4	4	4			NC			NC	I	NC	NC	249817_at	5017.6	4598.7	4808.15	P	P	0.000244	0.000244	3677.7	4267	3972.35	P	P	0.000244	0.000244	-0.5	-0.3	-0.3	-0.1	-0.3	0.163299	D	D	NC	NC	2	-0.1	0.2	NC	I	5163.5	4471.4	4817.45	P	P
249814_at	AT5G23840	12	4	4	4	D		NC	D	NC	NC	I	NC	NC	249814_at	1109.1	926.5	1017.8	P	P	0.000732	0.000244	470.1	803.8	636.95	P	P	0.005859	0.001953	-1.7	-1.4	-1.1	-0.9	-1.275	0.35	D	D	D	D	4	-0.2	0.7	NC	I	1120.5	1235.6	1178.05	P	P
249813_at	AT5G23940	11	3	4	4	I	NC	NC		NC	NC		NC	NC	249813_at	168.2	193.3	180.75	A	P	0.080566	0.01416	450.6	402.7	426.65	P	P	0.005859	0.00293	1.3	1.2	1	0.8	1.075	0.221736	I	I	I	I	4	-0.1	-0.3	NC	NC	200.4	208.9	204.65	P	P
249765_at	AT5G24030	12	4	4	4		NC	NC		NC	NC	I	NC	NC	249765_at	662.1	701.3	681.7	P	P	0.000244	0.000244	403.4	495.7	449.55	P	P	0.001953	0.000244	-0.7	-0.8	-0.4	-0.6	-0.625	0.170783	D	D	NC	D	3	0.2	0.4	NC	NC	788.2	835.5	811.85	P	P
249774_at	AT5G24150	12	4	4	4	I	NC	NC		NC	NC		NC	NC	249774_at	793.6	1187.5	990.55	P	P	0.01416	0.008057	1420.4	1387.8	1404.1	P	P	0.008057	0.00415	0.8	1	0.5	0.5	0.7	0.244949	I	I	I	I	4	0	-0.3	NC	NC	916.8	715.2	816	P	P
249775_at	AT5G24160	12	4	4	4	NC	NC	NC	NC		NC	I	NC	NC	249775_at	5985.3	4671.9	5328.6	P	P	0.000244	0.000244	4261.7	4481.9	4371.8	P	P	0.000244	0.000244	-0.3	-0.2	-0.3	-0.2	-0.25	0.057735	NC	NC	NC	NC	4	-0.1	0	NC	NC	4924	5969.3	5446.65	P	P
249777_at	AT5G24210	12	4	4	4		NC	NC	NC	NC	NC	I	NC	NC	249777_at	2261.1	2063.7	2162.4	P	P	0.001953	0.000244	1997.3	1876.9	1937.1	P	P	0.000732	0.001953	0	-0.2	-0.2	-0.3	-0.175	0.125831	NC	NC	NC	MD	3	0.2	-0.2	NC	NC	2147.7	2241.1	2194.4	P	P
249732_at	AT5G24420	12	4	4	4	I		NC	I	NC	NC	D	NC	NC	249732_at	290.2	257.7	273.95	P	P	0.018555	0.00415	945.5	386.5	666	P	P	0.001221	0.001953	1.7	1.9	0.3	0.4	1.075	0.84212	I	I	I	I	4	-0.2	-1.3	NC	D	247.7	262.7	255.2	P	P
249754_at	AT5G24530	12	4	4	4	I	NC	NC		NC		I	NC	NC	249754_at	936.8	813.1	874.95	P	P	0.000244	0.00415	1558.5	1564.6	1561.55	P	P	0.000244	0.000244	0.8	0.7	0.7	0.7	0.725	0.05	I	I	I	I	4	0	0	NC	NC	846.5	643	744.75	P	P
249748_at	AT5G24620	8	2	2	4		NC	NC	I	NC	NC	NC	NC	NC	249748_at	306.7	504.4	405.55	A	A	0.171387	0.067627	656.2	489.5	572.85	P	P	0.023926	0.023926	0.7	0.3	0.4	0.1	0.375	0.25	I	NC	NC	NC	1	0.6	-0.2	NC	NC	425.8	429.2	427.5	A	A
249752_at	AT5G24660	12	4	4	4	NC	NC	NC	D	NC	NC		NC	NC	249752_at	1225	1181.9	1203.45	P	P	0.000244	0.000732	1251	1276.1	1263.55	P	P	0.000732	0.000732	0	0	0	0	0	0	NC	NC	NC	NC	4	-0.1	-0.1	NC	NC	1484.8	1689.3	1587.05	P	P
245926_at	AT5G24740	12	4	4	4		NC	NC	I	NC	NC	NC	NC	NC	245926_at	314.2	314.3	314.25	P	P	0.010742	0.008057	436.8	360.1	398.45	P	P	0.005859	0.00415	0.5	0.4	0	-0.1	0.2	0.294392	I	I	NC	NC	2	0.1	-0.3	NC	NC	329.8	298.4	314.1	P	P
246917_at	AT5G25280	12	4	4	4	D	NC	NC		NC			NC	NC	246917_at	2480.5	2130.6	2305.55	P	P	0.00415	0.008057	1739.6	1497.8	1618.7	P	P	0.008057	0.005859	-0.4	-0.4	-0.5	-0.5	-0.45	0.057735	D	D	D	D	4	0	-0.2	NC	NC	2777.2	2213	2495.1	P	P
246944_at	AT5G25450	12	4	4	4		NC	NC	D	NC	NC		NC	NC	246944_at	1067	862	964.5	P	P	0.001953	0.00293	697.2	834.7	765.95	P	P	0.008057	0.00293	-0.6	-0.3	-0.1	-0.1	-0.275	0.236291	D	NC	NC	NC	1	-0.2	0.2	NC	NC	968.7	1029.8	999.25	P	P
246919_at	AT5G25460	12	4	4	4	I	NC	NC		NC	NC		NC	NC	246919_at	8401	9531.6	8966.3	P	P	0.000244	0.000244	11887.8	12067.4	11977.6	P	P	0.000244	0.000244	0.5	0.3	0.5	0.4	0.425	0.0957427	I	I	I	I	4	0.1	0	NC	NC	8664.1	8510.7	8587.4	P	P
246893_at	AT5G25520	12	4	4	4		NC	NC	I	NC	NC	NC	NC	NC	246893_at	708.6	781.4	745	P	P	0.000732	0.000244	869.9	674	771.95	P	P	0.000732	0.000732	0.5	0.3	0.2	0.1	0.275	0.170783	I	NC	NC	NC	1	0.2	-0.3	NC	NC	627.6	657	642.3	P	P
246897_at	AT5G25560	12	4	4	4				I	NC	NC		NC	NC	246897_at	749.3	1019.7	884.5	P	P	0.000244	0.000244	1254.8	950	1102.4	P	P	0.000244	0.000244	0.6	0.3	0.3	-0.1	0.275	0.287228	I	NC	I	NC	2	0.4	-0.3	I	D	759.3	706.9	733.1	P	P
246899_at	AT5G25590	12	4	4	4		NC	NC	I	NC	NC	NC	NC	NC	246899_at	265.9	259.3	262.6	P	P	0.023926	0.008057	478.4	214.6	346.5	P	P	0.00415	0.00415	0.5	0.6	0.1	0	0.3	0.294392	I	MI	NC	NC	1	0.1	-0.7	NC	NC	175	193.6	184.3	P	P
246901_at	AT5G25630	12	4	4	4		NC		I	NC	NC	NC	NC	NC	246901_at	1106	1223.6	1164.8	P	P	0.000244	0.000244	1607.7	1404.9	1506.3	P	P	0.000244	0.000244	0.5	0.2	0.1	-0.1	0.175	0.25	I	NC	NC	NC	1	0.4	-0.4	I	NC	1349.4	969.7	1159.55	P	P
246863_at	AT5G25940	12	4	4	4			NC	D	NC	NC	NC	NC	NC	246863_at	3600.2	2673.5	3136.85	P	P	0.000244	0.000244	2317.9	2749.5	2533.7	P	P	0.000244	0.000244	-0.5	-0.2	-0.4	0	-0.275	0.221736	D	NC	NC	NC	1	-0.4	0.2	NC	MI	3027.7	3277.6	3152.65	P	P
246880_s_at	AT5G25980	12	4	4	4	I	NC	NC		NC	NC		NC	NC	246880_s_at	16211.1	16686.3	16448.7	P	P	0.000244	0.000244	21874.4	22640.4	22257.4	P	P	0.000244	0.000244	0.6	0.5	0.5	0.5	0.525	0.05	I	I	I	I	4	0.1	0.1	NC	NC	19604.9	20729.9	20167.4	P	P
246825_at	AT5G26280;AT5G26260	12	4	4	4			NC			NC	I	NC	NC	246825_at	2616	3293.7	2954.85	P	P	0.000732	0.001221	2015	2690.4	2352.7	P	P	0.001953	0.000732	-0.6	-0.7	-0.1	-0.2	-0.4	0.294392	D	D	NC	NC	2	0.1	0.5	NC	I	3488.8	3130.6	3309.7	P	P
246855_at	AT5G26300;AT5G26280;AT5G26260	12	4	4	4	NC	NC	NC		NC		I	NC	NC	246855_at	3463.1	3581.6	3522.35	P	P	0.000244	0.000244	3133.9	3785	3459.45	P	P	0.000244	0.000244	-0.1	-0.1	0	0.1	-0.025	0.0957427	NC	NC	NC	NC	4	0	0.2	NC	NC	4055.2	3161.7	3608.45	P	P
247059_at	AT5G26310;AT5G66690	12	4	4	4			NC	D	NC	NC		NC	NC	247059_at	2657.4	2879.2	2768.3	P	P	0.000244	0.000732	2068.9	2415.6	2242.25	P	P	0.000244	0.000244	-0.3	-0.4	0.1	-0.1	-0.175	0.221736	NC	D	NC	NC	3	0.1	0.3	NC	I	2354	2711.8	2532.9	P	P
246846_at	AT5G26760	12	4	4	4		NC	NC	I	NC	NC	NC	NC	NC	246846_at	1181.2	1169.7	1175.45	P	P	0.008057	0.00415	1360.2	1219.5	1289.85	P	P	0.00415	0.00415	0.3	0.2	-0.2	-0.1	0.05	0.238048	I	NC	NC	NC	1	0.1	-0.4	NC	NC	941.1	854.1	897.6	P	P
246791_at	AT5G27280	12	4	4	4			NC	D	NC	NC	NC	NC	NC	246791_at	3743.1	3092.3	3417.7	P	P	0.000244	0.000244	2353.3	3399.8	2876.55	P	P	0.000244	0.000244	-0.4	-0.2	-0.1	0.1	-0.15	0.208167	D	NC	NC	NC	1	-0.2	0.3	NC	I	3161.2	3503.1	3332.15	P	P
246792_at	AT5G27290	12	4	4	4		NC	NC	I	NC	NC	D	NC	NC	246792_at	1004.2	1438.1	1221.15	P	P	0.001953	0.001221	1752.2	1474.2	1613.2	P	P	0.001953	0.001221	0.5	0.2	0.3	0	0.25	0.208167	I	NC	I	NC	2	0.3	-0.3	NC	NC	1175.5	1165.1	1170.3	P	P
246777_at	AT5G27420	9	2	3	4		NC	NC	D	NC	NC		NC	NC	246777_at	659.6	443	551.3	P	P	0.008057	0.023926	181.3	165.1	173.2	M	A	0.056152	0.111572	-1.2	-0.9	-1.2	-1	-1.075	0.15	D	NC	D	D	3	-0.3	-0.1	NC	NC	565.9	667.3	616.6	P	P
246780_at	AT5G27470	12	4	4	4	NC	NC	NC	I	NC	NC		NC	NC	246780_at	4251.2	4371.9	4311.55	P	P	0.000244	0.000244	4802	4583.7	4692.85	P	P	0.000244	0.000244	0.2	0.1	0	0	0.075	0.0957427	NC	NC	NC	NC	4	0	-0.1	NC	NC	3825.4	3889.4	3857.4	P	P
246748_at	AT5G27730	12	4	4	4		NC	NC	I	NC	NC	NC	NC	NC	246748_at	502.8	516.8	509.8	P	P	0.01416	0.001953	1053.1	574.8	813.95	P	P	0.001221	0.00293	0.8	0.5	0.3	0.1	0.425	0.298608	I	I	I	NC	3	0.2	-0.4	NC	NC	397.8	447.9	422.85	P	P
246745_at	AT5G27770	12	4	4	4	NC	NC	NC	NC	NC	NC	D	NC	NC	246745_at	8388.2	8638.9	8513.55	P	P	0.000244	0.000244	9071	9711.9	9391.45	P	P	0.000244	0.000244	0	0	0.2	0.2	0.1	0.11547	NC	NC	NC	NC	4	-0.1	0.1	NC	NC	9682.6	8641.3	9161.95	P	P
246749_at	AT5G27830	12	4	4	4	NC	NC	NC		NC	NC	I	NC	NC	246749_at	1061.9	888.6	975.25	P	P	0.000244	0.000244	997.3	1063.7	1030.5	P	P	0.000244	0.000244	-0.2	0	-0.1	0.1	-0.05	0.129099	NC	NC	NC	NC	4	-0.2	0	NC	NC	1190.7	1236.7	1213.7	P	P
246700_at	AT5G28030	12	4	4	4			NC	I	NC	NC		NC	NC	246700_at	605	747	676	P	P	0.000732	0.000732	893.4	831.6	862.5	P	P	0.000732	0.000244	0.6	0.1	-0.1	-0.4	0.05	0.420317	I	NC	NC	NC	1	0.3	-0.6	NC	MD	624.1	523.5	573.8	P	P
245861_at	AT5G28300	12	4	4	4	NC	NC	NC	I	NC	NC		NC	NC	245861_at	668.9	758.3	713.6	P	P	0.001221	0.001953	823.3	735.2	779.25	P	P	0.001221	0.000244	0.3	0.1	0.3	0	0.175	0.15	NC	NC	NC	NC	4	0.2	-0.2	NC	NC	625.2	564.5	594.85	P	P
246173_s_at	AT5G28370;AT3G61520;AT5G28460	12	4	4	4	NC	NC	NC	I	NC	NC	NC	NC	NC	246173_s_at	989.4	974.3	981.85	P	P	0.023926	0.000244	1273.2	1120.2	1196.7	P	P	0.000244	0.000244	0.4	0.2	0.2	0.1	0.225	0.125831	NC	NC	NC	NC	4	0	-0.1	NC	NC	1044.9	893.9	969.4	P	P
245917_at	AT5G28740	12	4	4	4		NC	NC	I	NC	NC	NC	NC	NC	245917_at	829.5	686	757.75	P	P	0.001953	0.001221	948	840.4	894.2	P	P	0.000732	0.001953	0.3	0.3	0.1	0.2	0.225	0.0957427	I	NC	NC	NC	1	0	-0.2	NC	NC	727.6	732.4	730	P	P
245925_at	AT5G28770	12	4	4	4	NC	NC	NC		NC		D	NC	NC	245925_at	848.9	687.6	768.25	P	P	0.001953	0.00293	820.1	640.6	730.35	P	P	0.00415	0.001953	0.1	0.1	-0.4	-0.3	-0.125	0.262996	NC	NC	NC	NC	4	0	-0.5	NC	NC	929.3	687.4	808.35	P	P
246050_s_at	AT5G28850;AT5G28900	12	4	4	4		NC	NC	I	NC	NC	NC	NC	NC	246050_s_at	1939.1	1936.2	1937.65	P	P	0.000244	0.000244	2295.5	1802.2	2048.85	P	P	0.000244	0.000244	0.3	0.3	0.1	0	0.175	0.15	I	NC	NC	NC	1	0.1	-0.3	NC	NC	1710.3	1895.9	1803.1	P	P
246682_at	AT5G33290	12	4	4	4			NC	D		NC	I	NC	NC	246682_at	1661.4	1876.9	1769.15	P	P	0.000732	0.000244	1192.5	1377.6	1285.05	P	P	0.000732	0.000244	-0.5	-0.6	-0.3	-0.3	-0.425	0.15	D	D	NC	NC	2	0	0.2	NC	MI	1873	2061.7	1967.35	P	P
246651_at	AT5G35170	12	4	4	4	I	NC	NC	I	NC			NC	NC	246651_at	1293.4	1398.9	1346.15	P	P	0.000244	0.000244	1923.7	1791.3	1857.5	P	P	0.000244	0.000244	0.7	0.4	0.5	0.4	0.5	0.141421	I	I	I	I	4	0.3	-0.1	NC	NC	1471.5	1207.9	1339.7	P	P
246652_at	AT5G35190	12	4	4	4			NC	D	NC	NC			NC	246652_at	490.1	710.8	600.45	P	P	0.000244	0.000244	375.2	388.9	382.05	P	P	0.001221	0.000244	-0.9	-1.2	-0.4	-0.6	-0.775	0.35	D	D	NC	D	3	0.3	0.7	NC	MI	423.7	497.4	460.55	P	P
246654_s_at	AT5G35210;AT5G35220	12	4	4	4		NC	NC	I	NC	NC	NC	NC	NC	246654_s_at	2225.7	2543	2384.35	P	P	0.000244	0.000244	3003.4	2970.1	2986.75	P	P	0.000244	0.000244	0.3	0.3	0.4	0.3	0.325	0.05	I	NC	I	NC	2	0	0	NC	NC	2517.2	2631.6	2574.4	P	P
249694_at	AT5G35790	12	4	4	4			NC	I	NC	NC		NC	NC	249694_at	1218.6	1835.9	1527.25	P	P	0.000244	0.000244	2356.1	1765.6	2060.85	P	P	0.000244	0.000732	0.4	0.3	0.1	-0.1	0.175	0.221736	I	MI	NC	NC	1	0.2	-0.3	NC	D	1465.7	1203.8	1334.75	P	P
249675_at	AT5G35940	12	4	4	4	NC	NC	NC	NC	NC	NC	I	NC	NC	249675_at	690.1	608.4	649.25	P	P	0.00415	0.000244	697.1	832	764.55	P	P	0.001953	0.000732	-0.3	-0.1	-0.2	-0.1	-0.175	0.0957427	NC	NC	NC	NC	4	-0.1	0.2	NC	NC	889.7	983.4	936.55	P	P
249691_at	AT5G36170	12	4	4	4		NC		I	NC	NC	NC	NC	NC	249691_at	1908	1871.4	1889.7	P	P	0.001953	0.000244	2475.7	2102.9	2289.3	P	P	0.000732	0.000244	0.5	0.3	0.3	0.1	0.3	0.163299	I	NC	I	NC	2	0.3	-0.2	I	NC	2092.1	1957.8	2024.95	P	P
249641_at	AT5G36950	12	4	4	4	NC	NC	NC	I	NC	NC	NC	NC	NC	249641_at	406.4	340.5	373.45	P	P	0.037598	0.037598	359.3	287.4	323.35	P	P	0.046143	0.030273	0.2	0.3	0.1	0.3	0.225	0.0957427	NC	NC	NC	NC	4	0	-0.2	NC	NC	315.4	311.8	313.6	P	P
255650_s_at	AT5G37190;AT4G00930	12	4	4	4	NC	NC	NC	I	NC	NC	NC	NC	NC	255650_s_at	177.6	147	162.3	P	P	0.0354	0.018555	268.4	201.4	234.9	P	P	0.005859	0.000732	0.4	0.5	0.4	0.4	0.425	0.05	NC	NC	NC	NC	4	0	-0.3	NC	NC	113.2	162.4	137.8	P	P
249628_at	AT5G37580	12	4	4	4	NC	NC	NC	I	NC	NC	NC	NC	NC	249628_at	166.7	219.8	193.25	P	P	0.018555	0.010742	201.6	173.9	187.75	P	P	0.00293	0.001221	0.7	-0.1	0.2	-0.2	0.15	0.404145	NC	NC	NC	NC	4	0.4	0	NC	NC	135.3	140.1	137.7	P	P
249515_at	AT5G38530	12	4	4	4	NC	NC	NC	NC	NC	NC	I	NC	NC	249515_at	2707.5	3320.7	3014.1	P	P	0.001221	0.000732	3260	3088.6	3174.3	P	P	0.000244	0.000244	0.1	-0.1	0.2	0	0.05	0.129099	NC	NC	NC	NC	4	0.1	0.1	NC	NC	3147.1	3903.2	3525.15	P	P
249537_at	AT5G38830	12	4	4	4		NC	NC	I	NC	NC	NC	NC	NC	249537_at	1622.6	1604.7	1613.65	P	P	0.000732	0.000244	1959.5	1519.2	1739.35	P	P	0.000244	0.000244	0.3	0.1	0.1	0	0.125	0.125831	I	NC	NC	NC	1	0.2	-0.2	NC	NC	1410.1	1595.9	1503	P	P
249477_s_at	AT5G38940;AT5G38930	11	3	4	4		NC		D	NC	NC			NC	249477_s_at	316.2	152.3	234.25	P	P	0.000244	0.00293	97.3	138.4	117.85	M	P	0.056152	0.023926	-1.3	-0.4	-1	-0.4	-0.775	0.45	D	NC	D	NC	2	-0.6	0.2	D	NC	501.1	509.5	505.3	P	P
249490_s_at	AT5G39120;AT5G39150;AT5G39180;AT5G39110	11	4	3	4	D		NC	D	NC	NC		NC	NC	249490_s_at	600.5	526.7	563.6	P	P	0.001953	0.000244	194.1	402.7	298.4	P	P	0.046143	0.001221	-1.3	-1.4	-0.6	-0.6	-0.975	0.434933	D	D	D	D	4	-0.1	0.9	NC	I	632.4	479	555.7	P	P
249454_at	AT5G39520	12	4	4	4		NC		D	NC	NC	I	NC	NC	249454_at	2050.8	1484	1767.4	P	P	0.000244	0.000244	1046.4	894.3	970.35	P	P	0.000732	0.000732	-0.7	-0.5	-1.1	-0.6	-0.725	0.262996	D	MD	D	D	3	-0.4	-0.3	D	NC	1768.4	1737	1752.7	P	P
249459_at	AT5G39580	12	4	4	4	D		NC	D	NC		I	NC	NC	249459_at	910.7	1008.4	959.55	P	P	0.000244	0.000244	297.7	541	419.35	P	P	0.01416	0.000732	-1.8	-2	-0.9	-1.1	-1.45	0.532291	D	D	D	D	4	0.2	0.8	NC	I	897.3	1360	1128.65	P	P
249442_at	AT5G39590	12	4	4	4	D	NC	NC	NC	NC	NC	NC	NC	NC	249442_at	5141.3	4565.7	4853.5	P	P	0.000244	0.000244	3647.8	3810.2	3729	P	P	0.000244	0.000244	-0.5	-0.3	-0.4	-0.2	-0.35	0.129099	D	D	D	D	4	-0.1	0	NC	NC	4300.1	4475	4387.55	P	P
249441_at	AT5G39730	12	4	4	4		NC	NC	D	NC	NC	NC	NC	NC	249441_at	3842.4	3018.1	3430.25	P	P	0.000244	0.000244	2210.3	3152.5	2681.4	P	P	0.000244	0.000244	-0.5	-0.3	-0.4	-0.1	-0.325	0.170783	D	D	NC	NC	2	-0.2	0.3	NC	NC	4078	3409.6	3743.8	P	P
249426_at	AT5G39840	4	0	2	2	NC	NC	NC	I	NC	NC	NC	NC	NC	249426_at	173.8	151.9	162.85	A	A	0.067627	0.171387	160.5	229.8	195.15	A	A	0.19458	0.067627	0.4	0.2	0.5	0.7	0.45	0.208167	NC	NC	NC	NC	4	-0.3	0.3	NC	NC	96.9	147.8	122.35	A	A
249436_at	AT5G39980;AT5G39970	7	1	2	4		NC	NC	I	NC	NC	NC	NC	NC	249436_at	325.4	252.7	289.05	A	P	0.080566	0.046143	357	303.1	330.05	A	A	0.067627	0.129639	0.4	0.6	0	0.1	0.275	0.275379	NC	I	NC	NC	3	-0.2	-0.4	NC	NC	248.3	208.1	228.2	A	A
249393_at	AT5G40170	12	4	4	4		NC	NC	NC	NC	NC	I	NC	NC	249393_at	454.9	408.9	431.9	P	P	0.001953	0.001953	574.4	403.9	489.15	P	P	0.001953	0.000244	0.6	0.4	0	0	0.25	0.3	I	NC	NC	NC	1	0	-0.2	NC	NC	590.4	497.2	543.8	P	P
249396_at	AT5G40200	12	4	4	4		NC	NC	I	NC	NC	NC	NC	NC	249396_at	1204.4	1377.2	1290.8	P	P	0.001953	0.001221	1633.1	1193.6	1413.35	P	P	0.001221	0.001221	0.4	0.2	0	0	0.15	0.191485	I	NC	NC	NC	1	0.2	-0.3	NC	NC	1295.9	1333.6	1314.75	P	P
249378_at	AT5G40450	12	4	4	4	NC	NC	NC	I	NC	NC	NC	NC	NC	249378_at	2490.1	2476.8	2483.45	P	P	0.000244	0.000732	3135.8	3080.7	3108.25	P	P	0.000732	0.000244	0.2	0.2	0.1	0.2	0.175	0.05	NC	NC	NC	NC	4	-0.2	-0.1	NC	NC	2347.4	1919.9	2133.65	P	P
249354_at	AT5G40480	12	4	4	4	I	NC	NC	I	NC	NC	NC	NC	NC	249354_at	482.7	577.4	530.05	P	P	0.000732	0.000244	898.7	790.8	844.75	P	P	0.000244	0.000244	0.6	0.7	0.5	0.5	0.575	0.0957427	I	I	I	I	4	0	-0.1	NC	NC	397.9	476.7	437.3	P	P
249364_at	AT5G40590	9	3	3	3		NC	NC	D	NC	NC	NC	NC	NC	249364_at	157	201.5	179.25	P	P	0.005859	0.01416	151.2	178.7	164.95	A	P	0.080566	0.008057	-0.4	-1.1	-0.1	-0.2	-0.45	0.450925	NC	D	NC	NC	3	0.4	0.6	NC	NC	257.8	303.1	280.45	P	P
249377_at	AT5G40690	12	4	4	4		NC	NC		NC	NC	I	NC	NC	249377_at	847.5	903.7	875.6	P	P	0.01416	0.00293	656.5	705.1	680.8	P	P	0.01416	0.005859	-0.4	-0.5	-0.3	-0.3	-0.375	0.0957427	D	D	NC	NC	2	0.1	0	NC	NC	1028.7	888.9	958.8	P	P
249375_at	AT5G40730	12	4	4	4			NC	D	NC	NC	NC	NC	NC	249375_at	20597.9	18354.4	19476.2	P	P	0.000244	0.000244	15951.7	20585.7	18268.7	P	P	0.000244	0.000244	-0.3	-0.2	0.1	0.2	-0.05	0.238048	D	D	NC	NC	2	-0.1	0.3	NC	I	15214.1	18128.1	16671.1	P	P
249327_at	AT5G40890	12	4	4	4		NC	NC	I	NC	NC	NC	NC	NC	249327_at	2678.4	3009.3	2843.85	P	P	0.000244	0.000244	3416.8	2703.4	3060.1	P	P	0.000244	0.000244	0.3	0.2	0.1	-0.1	0.125	0.170783	I	NC	NC	NC	1	0.2	-0.3	NC	NC	2601.7	2212.3	2407	P	P
249315_at	AT5G41190	12	4	4	4	NC	NC	NC	I	NC	NC	NC	NC	NC	249315_at	1122.2	925	1023.6	P	P	0.001953	0.00293	1353.4	1040	1196.7	P	P	0.001221	0.000732	0.1	0.3	-0.1	0.1	0.1	0.163299	NC	NC	NC	NC	4	-0.1	-0.2	NC	NC	940.3	998	969.15	P	P
249266_at	AT5G41670	12	4	4	4	NC	NC	NC		NC	NC	D	NC	NC	249266_at	4697.4	4529.4	4613.4	P	P	0.000244	0.000244	4403.1	5042	4722.55	P	P	0.000244	0.000244	-0.1	-0.1	0	0.1	-0.025	0.0957427	NC	NC	NC	NC	4	0	0.2	NC	NC	4585.8	5366.6	4976.2	P	P
249269_at	AT5G41770	12	4	4	4	NC	NC	NC	I	NC	NC	NC	NC	NC	249269_at	435.7	285.9	360.8	P	P	0.001221	0.000244	334.2	340.1	337.15	P	P	0.000244	0.000732	0.1	0.4	-0.2	0	0.075	0.25	NC	NC	NC	NC	4	-0.1	-0.3	NC	NC	324.1	339.7	331.9	P	P
249276_at	AT5G41880	12	4	4	4	I	NC	NC		NC	NC		NC	NC	249276_at	506.1	705.5	605.8	P	P	0.046143	0.023926	1033.6	784.3	908.95	P	P	0.01416	0.018555	0.9	0.5	0.8	0.5	0.675	0.206155	I	I	I	I	4	0.5	-0.1	NC	NC	634.5	582.9	608.7	P	P
249237_at	AT5G42050	12	4	4	4		NC	NC			NC	I	NC	NC	249237_at	3266.5	3318.1	3292.3	P	P	0.000244	0.000244	2857.7	2903.9	2880.8	P	P	0.000244	0.000244	-0.3	-0.2	-0.1	-0.2	-0.2	0.0816497	D	D	NC	NC	2	0	0	NC	NC	3238.5	3436.4	3337.45	P	P
249230_at	AT5G42070	12	4	4	4	NC	NC	NC	NC	NC	NC	D	NC	NC	249230_at	2324.9	1999.5	2162.2	P	P	0.000244	0.000244	2298.2	2180.6	2239.4	P	P	0.000244	0.000244	0	0	-0.1	-0.2	-0.075	0.0957427	NC	NC	NC	NC	4	-0.1	-0.1	NC	NC	2536.5	2208.4	2372.45	P	P
249235_at	AT5G42100	12	4	4	4	NC	NC	NC	NC	NC	NC	D	NC	NC	249235_at	5181.4	4562.8	4872.1	P	P	0.000244	0.000244	4545.6	4339.3	4442.45	P	P	0.000244	0.000244	-0.1	0	-0.1	0	-0.05	0.057735	NC	NC	NC	NC	4	-0.1	0	NC	NC	4182.4	4099.3	4140.85	P	P
249234_at	AT5G42200	12	4	4	4		NC	NC	D	NC	NC	NC	NC	NC	249234_at	646.9	738.9	692.9	P	P	0.001953	0.00293	423.3	386.1	404.7	P	P	0.01416	0.001221	-0.5	-0.6	-0.6	-0.5	-0.55	0.057735	D	D	D	NC	3	0.1	-0.2	NC	NC	535.9	366	450.95	P	P
249242_at	AT5G42250	12	4	4	4	NC	NC	NC	NC	NC	NC	I	NC	NC	249242_at	917.5	910.9	914.2	P	P	0.00415	0.008057	958.2	988.5	973.35	P	P	0.023926	0.00415	0	0.1	0.2	0	0.075	0.0957427	NC	NC	NC	NC	4	0	0.1	NC	NC	848.3	609.8	729.05	P	P
249247_at	AT5G42310	12	4	4	4	NC	NC	NC	I	NC	NC	NC	NC	NC	249247_at	1010.5	908.1	959.3	P	P	0.000244	0.000244	1197.6	1197.3	1197.45	P	P	0.000244	0.000244	0.3	0.3	0	0.2	0.2	0.141421	NC	NC	NC	NC	4	-0.1	-0.3	NC	NC	975.4	929.8	952.6	P	P
249200_at	AT5G42540	12	4	4	4	NC	NC	NC	I	NC	NC	NC	NC	NC	249200_at	732.8	583.4	658.1	P	P	0.018555	0.023926	825	741.1	783.05	P	P	0.010742	0.008057	0.2	0.3	0.1	0.2	0.2	0.0816497	NC	NC	NC	NC	4	-0.2	0.1	NC	NC	656.8	644.4	650.6	P	P
249208_at	AT5G42650	12	4	4	4			NC	D		NC	I	NC	NC	249208_at	2568.8	2178	2373.4	P	P	0.000244	0.000732	1434.6	1784.4	1609.5	P	P	0.000732	0.000244	-0.9	-0.6	-0.5	-0.2	-0.55	0.288675	D	D	D	NC	3	-0.3	0.3	NC	I	2444.5	2413.6	2429.05	P	P
249162_at	AT5G42765	12	4	4	4	NC	NC	NC	NC	NC	NC	D	NC	NC	249162_at	1694.5	1652	1673.25	P	P	0.000244	0.000244	1621.7	1666.4	1644.05	P	P	0.000244	0.000244	0	0.1	-0.1	0	0	0.0816497	NC	NC	NC	NC	4	-0.1	-0.1	NC	NC	1765.6	1827.8	1796.7	P	P
249177_at	AT5G42850	12	4	4	4					NC	NC	I	NC	NC	249177_at	6120.6	4824.1	5472.35	P	P	0.000244	0.000244	3163.3	4231.2	3697.25	P	P	0.000244	0.000244	-0.9	-0.6	-0.5	-0.1	-0.525	0.330404	D	D	D	NC	3	-0.4	0.3	MD	I	5616.8	5106.9	5361.85	P	P
249178_at	AT5G42890	12	4	4	4		NC	NC	D	NC	NC		NC	NC	249178_at	4499.6	4321.4	4410.5	P	P	0.000244	0.000244	3278.6	4173.9	3726.25	P	P	0.000244	0.000244	-0.4	-0.3	-0.2	0	-0.225	0.170783	D	D	NC	NC	2	-0.1	0.4	NC	NC	4897.3	4887	4892.15	P	P
249139_at	AT5G43170	12	4	4	4		NC	NC	D	NC	NC	NC	NC	NC	249139_at	1046.2	760.1	903.15	P	P	0.001953	0.001953	656.6	669.7	663.15	P	P	0.001953	0.005859	-0.6	-0.5	-0.7	-0.4	-0.55	0.129099	D	NC	D	D	3	-0.2	0.1	NC	NC	959.4	896.2	927.8	P	P
249147_at	AT5G43330	12	4	4	4				D	NC	NC		NC	NC	249147_at	2081.7	1447	1764.35	P	P	0.000244	0.000244	1367.7	1688.2	1527.95	P	P	0.000732	0.000244	-0.8	-0.4	-0.4	0	-0.4	0.326599	D	D	D	NC	3	-0.6	0.4	D	I	1923.2	2194.7	2058.95	P	P
249125_at	AT5G43450	12	4	4	4	D	NC	NC	NC		NC		NC	NC	249125_at	1207.9	1276.1	1242	P	P	0.00293	0.001953	1026.6	668.4	847.5	P	P	0.01416	0.001953	-0.4	-0.4	-0.6	-0.7	-0.525	0.15	D	D	D	D	4	0	-0.3	NC	NC	1274.3	1289.8	1282.05	P	P
249101_at	AT5G43580	12	4	4	4			NC			NC	I	NC	NC	249101_at	837.7	678.5	758.1	P	P	0.001953	0.00293	780.7	981.5	881.1	P	P	0.001953	0.001221	-0.1	0.3	0.3	0.7	0.3	0.326599	NC	NC	I	I	2	-0.3	0.4	NC	I	1142.2	1183.1	1162.65	P	P
249112_at	AT5G43780	12	4	4	4	D	NC	NC	D	NC		I		NC	249112_at	4104.3	3782.3	3943.3	P	P	0.000244	0.000244	2565.5	2739	2652.25	P	P	0.000732	0.000244	-0.6	-0.5	-0.6	-0.5	-0.55	0.057735	D	D	D	D	4	-0.1	0.1	NC	NC	4438.8	3319.4	3879.1	P	P
249115_at	AT5G43810	12	4	4	4		NC	NC	I	NC	NC	NC	NC	NC	249115_at	568.4	694.4	631.4	P	P	0.023926	0.005859	1217.9	730.5	974.2	P	P	0.00293	0.008057	0.7	0.5	0.4	0.2	0.45	0.208167	I	I	I	NC	3	0.3	-0.3	NC	NC	685	534.8	609.9	P	P
249118_at	AT5G43870	12	4	4	4	NC	NC	NC	NC	NC	NC	D	NC	NC	249118_at	332.5	282.6	307.55	P	P	0.000244	0.000732	316.4	309.2	312.8	P	P	0.000244	0.000732	0.3	0.1	0.1	0.1	0.15	0.1	NC	NC	NC	NC	4	-0.2	-0.3	NC	NC	325.1	291.2	308.15	P	P
249073_at	AT5G44020	12	4	4	4		NC	NC		NC	NC	D	NC	NC	249073_at	9338.9	9368.4	9353.65	P	P	0.000244	0.000244	6801.8	8140.8	7471.3	P	P	0.000244	0.000244	-0.5	-0.4	-0.3	-0.2	-0.35	0.129099	D	D	NC	NC	2	-0.1	0.2	NC	NC	7930	9152.8	8541.4	P	P
249037_at	AT5G44130	12	4	4	4	D		NC	D	NC	NC		NC	NC	249037_at	7288.3	6443.4	6865.85	P	P	0.000244	0.000244	2938	5015.8	3976.9	P	P	0.000244	0.000244	-1.3	-1.1	-0.6	-0.4	-0.85	0.420317	D	D	D	D	4	-0.2	0.7	NC	I	6483.5	6602.9	6543.2	P	P
249036_at	AT5G44200	12	4	4	4		NC		I	NC	NC	NC	NC	NC	249036_at	582.5	951.5	767	P	P	0.00415	0.000732	1033.9	1027.6	1030.75	P	P	0.001221	0.000732	0.6	0.1	0.5	0	0.3	0.294392	I	NC	I	NC	2	0.5	-0.2	I	NC	886.1	772.7	829.4	P	P
249045_at	AT5G44380	12	4	4	4			NC			NC	I	NC	NC	249045_at	4624.1	4035.4	4329.75	P	P	0.000244	0.000244	2788	3757.3	3272.65	P	P	0.000244	0.000244	-0.7	-0.5	-0.3	-0.1	-0.4	0.258199	D	D	NC	NC	2	-0.2	0.4	NC	I	4911.2	4590.9	4751.05	P	P
249051_at	AT5G44390	11	4	3	4		NC	NC			NC	I	NC	NC	249051_at	436.3	283.2	359.75	P	P	0.001953	0.000244	224.5	194.5	209.5	P	P	0.005859	0.000244	-0.5	-0.5	-0.2	-0.5	-0.425	0.15	MD	D	NC	NC	1	-0.2	0.2	NC	NC	284.8	359.8	322.3	P	P
249046_at	AT5G44400	12	4	4	4	I	NC	NC		NC	NC	NC	NC	NC	249046_at	747.6	1132	939.8	P	P	0.001953	0.001221	1592.1	1556.2	1574.15	P	P	0.000244	0.000732	0.6	0.4	0.6	0.5	0.525	0.0957427	I	I	I	I	4	0	0.1	NC	NC	1096.5	966.8	1031.65	P	P
249059_at	AT5G44530	11	3	4	4	I	NC	NC	I	NC	NC	NC	NC	NC	249059_at	484.4	441	462.7	P	A	0.046143	0.080566	661.7	580.2	620.95	P	P	0.008057	0.018555	0.9	0.7	0.5	0.5	0.65	0.191485	I	I	I	I	4	0	-0.2	NC	NC	369.9	390.2	380.05	P	P
249004_at	AT5G44570	12	4	4	4		NC		D	NC	NC		NC		249004_at	1279.7	686.6	983.15	P	P	0.01416	0.010742	580.7	687.9	634.3	P	P	0.010742	0.018555	-0.9	-0.2	-0.9	-0.1	-0.525	0.434933	D	NC	D	NC	2	-0.9	-0.2	D	NC	898.1	725.2	811.65	P	P
249008_at	AT5G44680	12	4	4	4	I	NC	NC		NC		D	NC	NC	249008_at	1039.5	1171.6	1105.55	P	P	0.008057	0.005859	2317.4	1322.4	1819.9	P	P	0.00293	0.001953	1.1	0.9	0.5	0.3	0.7	0.365148	I	I	I	I	4	0.2	-0.6	NC	NC	1415.8	1108.8	1262.3	P	P
249026_at	AT5G44785	12	4	4	4	NC	NC	NC	I	NC	NC	NC	NC	NC	249026_at	772	830.5	801.25	P	P	0.000244	0.001953	830	1062.6	946.3	P	P	0.000732	0.000244	0.1	0.1	-0.1	0.2	0.075	0.125831	NC	NC	NC	NC	4	-0.1	0	NC	NC	653.5	662.2	657.85	P	P
254521_at	AT5G44820	12	4	4	4		NC	NC		NC	NC	I	NC	NC	254521_at	295.1	368.5	331.8	P	P	0.000244	0.00415	233.1	329.8	281.45	P	P	0.023926	0.001953	-0.4	-0.5	-0.5	-0.4	-0.45	0.057735	NC	NC	MD	NC	3	-0.1	0	NC	NC	433	292.5	362.75	P	P
249021_at	AT5G44820	12	4	4	4	NC	NC	NC		NC		I	NC	NC	249021_at	391.7	360.2	375.95	P	P	0.000244	0.001953	524.4	419.2	471.8	P	P	0.00415	0.001221	-0.2	-0.1	-0.3	-0.1	-0.175	0.0957427	NC	NC	NC	NC	4	-0.1	-0.1	NC	NC	655.2	463	559.1	P	P
248968_at	AT5G45280	12	4	4	4	D	NC	NC		NC	NC		NC	NC	248968_at	2815.7	2640.7	2728.2	P	P	0.000244	0.000244	1801.6	2032.2	1916.9	P	P	0.000244	0.000244	-0.6	-0.5	-0.4	-0.5	-0.5	0.0816497	D	D	D	D	4	0	0.1	NC	NC	2600.3	2879.5	2739.9	P	P
248967_at	AT5G45350	12	4	4	4		NC	NC	D	NC	NC	NC	NC	NC	248967_at	4388.7	4943.4	4666.05	P	P	0.000732	0.000244	3496.4	3864.3	3680.35	P	P	0.000732	0.000732	-0.3	-0.2	-0.1	-0.2	-0.2	0.0816497	NC	D	NC	NC	3	0	0.1	NC	NC	4536.1	4731.1	4633.6	P	P
248952_at	AT5G45410	12	4	4	4		NC	NC			NC	I	NC	NC	248952_at	4149.9	3388.5	3769.2	P	P	0.000244	0.000244	2968.3	3386.7	3177.5	P	P	0.000244	0.000244	-0.4	-0.3	-0.3	-0.1	-0.275	0.125831	D	D	NC	NC	2	-0.1	0.1	NC	NC	3155.2	3171.6	3163.4	P	P
248912_at	AT5G45670	12	4	4	4	I		NC	I	NC	NC	NC	NC	NC	248912_at	562.8	677.8	620.3	P	P	0.000732	0.000732	1100.8	832.5	966.65	P	P	0.000244	0.000244	1	0.9	0.6	0.5	0.75	0.238048	I	I	I	I	4	0.1	-0.5	NC	D	495.8	579.4	537.6	P	P
248908_at	AT5G45800	12	4	4	4		NC	NC	NC	NC	NC	I	NC	NC	248908_at	1848.7	1581.3	1715	P	P	0.000244	0.000244	1640.6	1795.2	1717.9	P	P	0.000244	0.000244	-0.2	0	0	0.1	-0.025	0.125831	MD	NC	NC	NC	1	-0.3	0.2	NC	NC	1961.4	2050.4	2005.9	P	P
248920_at	AT5G45930;AT5G45940	12	4	4	4	NC	NC	NC		NC	NC	D	NC	NC	248920_at	1125.8	1211.1	1168.45	P	P	0.000244	0.000244	1413.7	1465.4	1439.55	P	P	0.000244	0.000244	0.4	0.3	0.5	0.2	0.35	0.129099	NC	NC	NC	NC	4	0.1	0	NC	NC	1551.2	1218.6	1384.9	P	P
248921_at	AT5G45950	9	2	3	4	I	NC	NC		NC	NC		NC	NC	248921_at	660.3	509.2	584.75	A	A	0.111572	0.080566	1232.3	1130.6	1181.45	P	P	0.010742	0.010742	1.1	1.1	0.8	0.8	0.95	0.173205	I	I	I	I	4	-0.1	-0.3	NC	NC	778.8	825.8	802.3	P	M
248933_at	AT5G46070	12	4	4	4			NC	I	NC	NC	NC	NC	NC	248933_at	377.7	535.4	456.55	P	P	0.000244	0.000732	772.9	649	710.95	P	P	0.000244	0.000732	0.7	0.4	0.3	0.1	0.375	0.25	I	I	NC	NC	2	0.3	-0.4	NC	MD	397.9	574.2	486.05	P	P
248882_at	AT5G46210	12	4	4	4		NC	NC	I	NC	NC	NC	NC	NC	248882_at	3799.4	3816.1	3807.75	P	P	0.000244	0.000244	4705.1	3940.6	4322.85	P	P	0.000244	0.000244	0.2	0.2	0	0	0.1	0.11547	MI	NC	NC	NC	1	-0.1	-0.2	NC	NC	3154.9	3366.8	3260.85	P	P
248891_at	AT5G46280	12	4	4	4	I	NC	NC	I	NC	NC	I	NC	NC	248891_at	434.8	491.4	463.1	P	P	0.001953	0.001221	1007.1	933.7	970.4	P	P	0.000732	0.000732	1.1	0.8	0.9	0.7	0.875	0.170783	I	I	I	I	4	0.3	-0.1	NC	NC	493.4	501	497.2	P	P
248906_at	AT5G46420	12	4	4	4		NC	NC	I	NC	NC	NC	NC	NC	248906_at	1049.2	1292.8	1171	P	P	0.000244	0.000244	1405.1	1267.5	1336.3	P	P	0.000244	0.000244	0.4	0.2	0.3	0	0.225	0.170783	I	NC	NC	NC	1	0.3	-0.2	NC	NC	1144.9	1004.1	1074.5	P	P
248854_at	AT5G46580	12	4	4	4	I	NC	NC	I		NC	NC	NC	NC	248854_at	1812.7	1964.3	1888.5	P	P	0.000244	0.000244	2646	2446.4	2546.2	P	P	0.000244	0.000244	0.4	0.5	0.4	0.4	0.425	0.05	I	I	I	I	4	0.1	0	NC	NC	2034.7	1864.9	1949.8	P	P
248839_at	AT5G46690	10	2	4	4	I	NC	NC		NC	NC	NC	NC	NC	248839_at	263.3	395.6	329.45	A	A	0.111572	0.067627	528.6	428.5	478.55	P	P	0.023926	0.046143	0.9	0.5	0.9	0.4	0.675	0.262996	I	I	I	I	4	0.3	-0.2	NC	NC	380.7	259.2	319.95	P	P
248838_at	AT5G46800	12	4	4	4	NC	NC	NC	NC	NC	NC	D	NC	NC	248838_at	3198.1	3949.9	3574	P	P	0.000732	0.000732	3936.2	3914.1	3925.15	P	P	0.000732	0.000732	0.1	-0.1	0.1	-0.1	0	0.11547	NC	NC	NC	NC	4	0.2	-0.1	NC	NC	4491.6	4303.3	4397.45	P	P
248844_s_at	AT5G46900	12	4	4	4			NC		NC	NC	I	NC	NC	248844_s_at	1826.8	1908.6	1867.7	P	P	0.000244	0.000244	1342	1993.8	1667.9	P	P	0.001221	0.000244	-0.6	-0.6	0.1	0.2	-0.225	0.434933	D	D	NC	NC	2	-0.1	0.8	NC	I	1739.5	1387.6	1563.55	P	P
248828_at	AT5G47110	12	4	4	4	NC	NC	NC	I	NC	NC		NC	NC	248828_at	5017.4	4920.5	4968.95	P	P	0.000732	0.000732	6162.4	6263.5	6212.95	P	P	0.000732	0.000732	0.2	0.2	0.2	0.1	0.175	0.05	NC	NC	NC	NC	4	0.1	-0.1	NC	NC	6556.6	5868.1	6212.35	P	P
248829_at	AT5G47130	6	3	3	0	NC	NC	NC	D	NC	NC	NC	NC	NC	248829_at	308.1	358.7	333.4	P	P	0.023926	0.018555	329.6	270.4	300	A	P	0.095215	0.023926	0.5	-0.2	0.1	-0.1	0.075	0.30957	NC	NC	NC	NC	4	-0.1	-0.2	NC	NC	442.7	459.3	451	P	P
248794_at	AT5G47220	12	4	4	4	D	NC	NC			NC		NC	NC	248794_at	1192.5	995.9	1094.2	P	P	0.000244	0.000244	701.8	735.1	718.45	P	P	0.018555	0.000244	-0.5	-0.5	-0.7	-0.6	-0.575	0.0957427	D	D	D	D	4	0	-0.2	NC	NC	1141.5	1443.6	1292.55	P	P
248790_at	AT5G47450	5	2	3	0		NC	NC	D	NC	NC	NC	NC	NC	248790_at	547.4	676.5	611.95	P	P	0.010742	0.030273	350.3	303.6	326.95	A	A	0.080566	0.080566	-0.5	-1.1	-0.6	-1	-0.8	0.294392	D	NC	D	D	3	0.3	-0.2	NC	NC	615.4	563.6	589.5	P	P
248807_at	AT5G47500	12	4	4	4	I	NC	NC	I	NC	NC	D	NC	NC	248807_at	392.2	467.4	429.8	P	P	0.001953	0.00293	891.3	691	791.15	P	P	0.001953	0.001953	1.4	0.9	0.9	0.5	0.925	0.368556	I	I	I	I	4	0.5	-0.5	NC	NC	715.4	418.1	566.75	P	P
248756_at	AT5G47560	12	4	4	4	D	NC	NC	D		NC	NC	NC	NC	248756_at	8121.1	6715.1	7418.1	P	P	0.000244	0.000244	5591.2	5039.1	5315.15	P	P	0.000244	0.000244	-0.5	-0.3	-0.6	-0.3	-0.425	0.15	D	D	D	D	4	-0.3	-0.1	NC	NC	7623.6	7369	7496.3	P	P
248760_at	AT5G47570	12	4	4	4			NC	D	NC	NC	NC	NC	NC	248760_at	18893	15584.2	17238.6	P	P	0.000244	0.000244	13905.2	14660.5	14282.9	P	P	0.000244	0.000244	-0.5	-0.4	-0.2	-0.1	-0.3	0.182574	D	D	NC	NC	2	-0.1	0.3	NC	I	15563.8	18924.7	17244.2	P	P
248757_at	AT5G47680	12	4	4	4		NC	NC	I	NC	NC	NC	NC	NC	248757_at	1153.8	1211.6	1182.7	P	P	0.000732	0.000732	1716.5	1467.7	1592.1	P	P	0.000732	0.000732	0.5	0.4	0.3	0.1	0.325	0.170783	I	I	NC	NC	2	0.3	-0.3	NC	NC	1319.9	1211.5	1265.7	P	P
248768_at	AT5G47700	12	4	4	4		NC	NC			NC	D	NC	NC	248768_at	16700.9	14051.8	15376.4	P	P	0.000244	0.000244	12520	14116.6	13318.3	P	P	0.000244	0.000244	-0.3	-0.1	-0.3	0	-0.175	0.15	D	NC	NC	NC	1	-0.2	0.1	NC	NC	14939.6	15915.2	15427.4	P	P
248718_at	AT5G47770	12	4	4	4		NC	NC	I	NC	NC	NC	NC	NC	248718_at	1349.5	1474.8	1412.15	P	P	0.001221	0.001953	1482	1646.1	1564.05	P	P	0.000732	0.000244	0.3	0.1	0.4	0	0.2	0.182574	MI	NC	NC	NC	1	0.3	-0.2	NC	NC	1298.1	1434.5	1366.3	P	P
248725_at	AT5G47980	12	4	4	4		NC	NC	D	NC	NC	I	NC	NC	248725_at	1067	1425.8	1246.4	P	P	0.000244	0.000244	997.1	1008.4	1002.75	P	P	0.001953	0.000244	-0.3	-0.5	-0.1	-0.3	-0.3	0.163299	D	D	NC	NC	2	0.2	0.1	NC	NC	1191	1126.8	1158.9	P	P
248727_at	AT5G47990	12	4	4	4			NC	D		NC	I	NC	NC	248727_at	2105.5	2502.7	2304.1	P	P	0.000244	0.000244	1522.6	1745.2	1633.9	P	P	0.000244	0.000244	-0.5	-0.7	-0.2	-0.4	-0.45	0.208167	D	D	NC	D	3	0.1	0.4	NC	I	1995.7	2043.8	2019.75	P	P
248728_at	AT5G48000	12	4	4	4		NC		D	NC	NC	I	NC	NC	248728_at	2300.5	2854.1	2577.3	P	P	0.000732	0.000244	2421.4	2775.8	2598.6	P	P	0.000732	0.000244	0	-0.3	0.1	-0.1	-0.075	0.170783	NC	D	NC	NC	3	0.3	0.1	I	NC	2521.6	2899.6	2710.6	P	P
248729_at	AT5G48010	12	4	4	4	NC		NC	D	NC	NC	I	NC	NC	248729_at	2219.1	2352.4	2285.75	P	P	0.000732	0.000244	1993.4	2573.4	2283.4	P	P	0.000244	0.000244	-0.2	-0.2	0.2	0.3	0.025	0.262996	NC	NC	NC	NC	4	-0.1	0.4	NC	I	1861.6	2301.2	2081.4	P	P
248739_at	AT5G48030	12	4	4	4	NC	NC	NC	I	NC	NC	NC	NC	NC	248739_at	1402.7	1569.4	1486.05	P	P	0.000244	0.000244	1437.2	1690.1	1563.65	P	P	0.000732	0.000244	0.4	0	0.3	0.1	0.2	0.182574	NC	NC	NC	NC	4	0.2	0.1	NC	NC	1521.4	1601.1	1561.25	P	P
248732_at	AT5G48070	12	4	4	4	NC	NC	NC	NC	NC	NC	D	NC	NC	248732_at	224.4	148.9	186.65	P	P	0.001953	0.000732	193.3	275.1	234.2	P	P	0.001953	0.001953	0.1	0.5	-0.1	0.6	0.275	0.330404	NC	NC	NC	NC	4	-0.4	0	NC	NC	153.4	127.2	140.3	P	P
248713_at	AT5G48180	12	4	4	4	NC	NC	NC			NC	I	NC	NC	248713_at	2901.2	2872.8	2887	P	P	0.000244	0.000244	2551.5	2068	2309.75	P	P	0.000244	0.000244	-0.1	0.1	-0.4	-0.2	-0.15	0.208167	NC	NC	NC	NC	4	-0.2	-0.3	NC	NC	3332.3	3375.1	3353.7	P	P
248688_at	AT5G48220	12	4	4	4	NC	NC	NC	I	NC	NC		NC	NC	248688_at	954.1	1064.5	1009.3	P	P	0.000244	0.000244	1064.6	1065.5	1065.05	P	P	0.000244	0.000244	0.2	-0.1	0	0	0.025	0.125831	NC	NC	NC	NC	4	0.1	0	NC	NC	962.1	746.1	854.1	P	P
[truncated: 192 more rows]
[truncated: 63 more columns]
