# Supplementary material for: Dissecting regulatory pathways of G1/S control in Arabidopsis: common and distinct targets of CYCD3;1, E2Fa and E2Fc
Source: Springer Nature journal article supplement (doi:10.1007/s11103-009-9527-5), 2009-08-06
Supplement: MOESM9 [file 11103_2009_9527_MOESM9_ESM.xls]

## Sheet: Sheet1
6h_robust change call	24h_robust change call	14d_robust change call	MIPS code	description
6 h AND 24 h AND 14 d
I	I	I	AT4G22200	potassium channel protein 2 (AKT2) (AKT3) identical to potassium channel [Arabidopsis thaliana] gi|1100898|gb|AAA97865; Note: also identical to AKT3 [Arabidopsis thaliana] gi|1172218|gb|AAA96153, which is a truncated version of AKT2, PMID:10852932; membe
D	D	I	AT4G30450	glycine-rich protein
D	D	D	AT4G17245	zinc finger (C3HC4-type RING finger) family protein contains Pfam profile: PF00097 zinc finger, C3HC4 type (RING finger)
D	D	D	AT5G60680	expressed protein contains Pfam profile PF04520: Protein of unknown function, DUF584
D	D	D	AT5G44020	acid phosphatase class B family protein similar to SP|P15490 STEM 28 kDa glycoprotein precursor (Vegetative storage protein A) {Glycine max}, acid phosphatase [Glycine max] GI:3341443; contains Pfam profile PF03767: HAD superfamily (subfamily IIIB) phosp
D	D	D	AT5G19120;AT5G19130	[AT5G19120, expressed protein low similarity to extracellular dermal glycoprotein EDGP precursor [Daucus carota] GI:285741, SP|P13917 Basic 7S globulin precursor {Glycine max}];[AT5G19130, GPI transamidase component family protein / Gaa1-like family pro
D	D	D	AT4G28290	expressed protein
D	D	D	AT3G26510	octicosapeptide/Phox/Bem1p (PB1) domain-containing protein contains Pfam profile PF00564: PB1 domain
D	D	D	AT3G10810	zinc finger (C3HC4-type RING finger) family protein contains Pfam profile: PF00097 Zinc finger, C3HC4 type (RING finger)
D	D	D	AT2G17880	DNAJ heat shock protein, putative similar to J11 protein [Arabidopsis thaliana] GI:9843641; contains Pfam profile PF00226 DnaJ domain
D	D	D	AT1G03870	fasciclin-like arabinogalactan-protein (FLA9) identical to gi_13377784_gb_AAK20861
6 h AND 24 h
I	I		AT5G64840	ABC transporter family protein
I	I		AT5G64940	ABC1 family protein contains Pfam domain, PF03109: ABC1 family
I	I		AT5G42760;AT5G42765	[AT5G42760, O-methyltransferase N-terminus domain-containing protein contains Pfam profile PF02409: O-methyltransferase N-terminus];[AT5G42765, expressed protein]
I	I		AT5G01220	UDP-sulfoquinovose:DAG sulfoquinovosyltransferase / sulfolipid synthase (SQD2) identical to GI:20302857
I	I		AT1G07010	calcineurin-like phosphoesterase family protein contains Pfam profile: PF00149 calcineurin-like phosphoesterase
I	I		AT3G21670	nitrate transporter (NTP3) nearly identical to nitrate transporter [Arabidopsis thaliana] GI:4490323; contains Pfam profile: PF00854 POT family
I	I		AT3G02870	inositol-1(or 4)-monophosphatase, putative / inositol monophosphatase, putative / IMPase, putative similar to SP|P54928 Inositol-1(or 4)-monophosphatase 3 (EC 3.1.3.25) (IMPase 3) (IMP 3) (Inositol monophosphatase 3) {Lycopersicon esculentum}; contains P
I	I		AT3G08720;AT3G08730	[AT3G08720, serine/threonine protein kinase (PK19) identical to serine/threonine-protein kinase AtPK19 (Ribosomal-protein S6 kinase homolog) [Arabidopsis thaliana] SWISS-PROT:Q39030];[AT3G08730, serine/threonine protein kinase (PK1) (PK6) identical to s
I	I		AT3G03770	leucine-rich repeat transmembrane protein kinase, putative may contain C-terminal ser/thr protein kinase domain, similar to serine/threonine protein kinase Pto GB:AAB47421 [Lycopersicon esculentum]
I	I		AT1G70580	glutamate:glyoxylate aminotransferase 2 (GGT2) identical to glutamate:glyoxylate aminotransferase 2 [Arabidopsis thaliana] GI:24461829; similar to alanine aminotransferase from Panicum miliaceum [SP|P34106], GI:4730884 from Oryza sativa; contains Pfam pr
I	I		AT1G01060	myb family transcription factor contains Pfam profile: PF00249 myb-like DNA-binding domain; identical to cDNA LATE ELONGATED HYPOCOTYL MYB transcription factor GI:3281845
I	I		AT2G46830	myb-related transcription factor (CCA1) identical to myb-related transcription factor (CCA1) GI:4090569 from [Arabidopsis thaliana]
I	I		AT2G44460	glycosyl hydrolase family 1 protein contains Pfam PF00232 : Glycosyl hydrolase family 1 domain; TIGRFAM TIGR01233: 6-phospho-beta-galactosidase; similar to beta-glucosidase 1 (GI:12043529) [Arabidopsis thaliana]
D	D		AT5G61590	AP2 domain-containing transcription factor family protein contains Pfam PF00847: AP2 domain
D	D		AT5G54490	calcium-binding EF-hand protein, putative similar to EF-hand Ca2+-binding protein CCD1 [Triticum aestivum] GI:9255753; contains INTERPRO:IPR002048 calcium-binding EF-hand domain
D	D		AT4G14270	expressed protein
D	D		AT1G28330	dormancy-associated protein, putative (DRM1) identical to dormancy-associated protein [Arabidopsis thaliana] GI:2995990; similar to dormancy-associated protein GI:2605887 from [Pisum sativum]; contains Pfam profile PF05564: Dormancy/auxin associated prot
D	D		AT3G56880	VQ motif-containing protein contains PF05678: VQ motif
D	D		AT5G14920	gibberellin-regulated family protein similar to SP|P46689 Gibberellin-regulated protein 1 precursor {Arabidopsis thaliana}; contains Pfam profile PF02704: Gibberellin regulated protein
D	D		AT5G27420	zinc finger (C3HC4-type RING finger) family protein similar to RING-H2 zinc finger protein ATL6 [Arabidopsis thaliana] gi|4928403|gb|AAD33584.1|AF132016_1[4928403]; contains Pfam domain, PF00097: Zinc finger, C3HC4 type (RING finger)
D	D		AT5G53250	arabinogalactan-protein, putative (AGP22) similar to arabinogalactan protein [Arabidopsis thaliana] gi|10880509|gb|AAG24284
D	D		AT5G51190	AP2 domain-containing transcription factor, putative contains similarity to ethylene responsive element binding factor
D	D		AT5G47450	major intrinsic family protein / MIP family protein contains Pfam profile: MIP PF00230
D	D		AT5G18670	beta-amylase, putative (BMY3) / 1,4-alpha-D-glucan maltohydrolase, putative almost identical to beta-amylase BMY3 GI:15149457 from [Arabidopsis thaliana]; identical to cDNA putative beta-amylase BMY3 (BMY3) GI:15149456
D	D		AT3G59950;AT3G59940	[AT3G59950, autophagy 4b (APG4b) identical to autophagy 4b [Arabidopsis thaliana] gi|19912145|dbj|BAB88384];[AT3G59940, kelch repeat-containing F-box family protein contains Pfam profiles PF01344: Kelch motif, PF00646: F-box domain]
D	D		AT3G55980	zinc finger (CCCH-type) family protein contains Pfam domain, PF00642: Zinc finger C-x8-C-x5-C-x3-H type (and similar) and Pfam domain, PF00023: Ankyrin repeat
D	D		AT3G52070	expressed protein
D	D		AT3G52060	expressed protein contains Pfam profile PF03267: Arabidopsis protein of unknown function, DUF266
D	D		AT3G50060	myb family transcription factor contains Pfam profile: PF00249 myb-like DNA-binding domain; identical to cDNA MYB-related protein (1107 bp) GI:1263096
D	D		AT3G46620	zinc finger (C3HC4-type RING finger) family protein contains Pfam domain, PF00097: Zinc finger, C3HC4 type (RING finger)
D	D		AT4G36040	DNAJ heat shock N-terminal domain-containing protein (J11) identical to dnaJ heat shock protein J11 [Arabidopsis thaliana] GI:9843641; contains Pfam profile PF00226 DnaJ domain
D	D		AT4G34770	auxin-responsive family protein similar to auxin-induced protein X10A (SP:P33080) [Glycine max]; small auxin up-regulated RNA, Malus domestica, gb:Z93766
D	D		AT4G29190	zinc finger (CCCH-type) family protein contains Pfam domain, PF00642: Zinc finger C-x8-C-x5-C-x3-H type (and similar)
D	D		AT4G27280	calcium-binding EF hand family protein similar to EF-hand Ca2+-binding protein CCD1 [Triticum aestivum] GI:9255753; contains INTERPRO:IPR002048 calcium-binding EF-hand domain
D	D		AT4G24570	mitochondrial substrate carrier family protein contains Pfam profile: PF00153 mitochondrial carrier protein
D	D		AT4G11360	zinc finger (C3HC4-type RING finger) family protein (RHA1b) identical to RING-H2 finger protein RHA1b [Arabidopsis thaliana] GI:3790567
D	D		AT4G05070	expressed protein
D	D		AT4G03510	zinc finger (C3HC4-type RING finger) family protein (RMA1) identical to RING zinc finger protein RMA1 gi:3164222
D	D		AT1G22190	AP2 domain-containing transcription factor, putative similar to AP2 domain containing protein RAP2.4 GI:2281633 from [Arabidopsis thaliana]
D	D		AT1G56220	dormancy/auxin associated family protein similar to Auxin-repressed 12.5 kDa protein (Swiss-Prot:Q05349) [Fragaria ananassa]; similar to auxin-repressed protein (GI:927034) [Fragaria x ananassa]; similar to dormancy-associated protein (GI:2605887) [Pisum
D	D		AT3G20340	expressed protein
D	D		AT3G23170	expressed protein
D	D		AT3G10020	expressed protein
D	D		AT3G07350	expressed protein contains Pfam profile PF04720: Protein of unknown function (DUF506)
D	D		AT1G15670	kelch repeat-containing F-box family protein similar to SP|Q9ER30 Kelch-related protein 1 (Sarcosin) {Rattus norvegicus}; contains Pfam profiles PF01344: Kelch motif, PF00646: F-box domain
D	D		AT1G19770	purine permease-related low similarity to purine permease [Arabidopsis thaliana] GI:7620007; contains Pfam profile PF03151: Domain of unknown function, DUF250
D	D		AT1G32920	expressed protein
D	D		AT1G26800	zinc finger (C3HC4-type RING finger) family protein contains Pfam profile: PF00097 zinc finger, C3HC4 type (RING finger)
D	D		AT2G40140	zinc finger (CCCH-type) family protein contains Pfam domain, PF00642: Zinc finger C-x8-C-x5-C-x3-H type (and similar) and Pfam domain, PF00023: Ankyrin repeat
D	D		AT2G04795	expressed protein
D	D		AT2G25200	expressed protein
D	D		AT1G27290	expressed protein
D	D		AT2G15960	expressed protein
D	D		AT2G25490	F-box family protein (FBL6) contains similarity to grr1 GI:2407790 from [Glycine max]
D	D		AT2G27830	expressed protein
D	D		AT2G06925	phospholipase A2 family protein similar to secretory low molecular weight phospholipase A2 beta [Arabidopsis thaliana] GI:25992715; contains INTERPRO domain IPR001211 phospholipase A2
D	D		AT2G25735	expressed protein
D	D		AT2G44130;AT2G44140	[AT2G44130, kelch repeat-containing F-box family protein very low similarity to SP|Q9ER30 Kelch-related protein 1 (Sarcosin) {Rattus norvegicus}; contains Pfam profiles PF01344: Kelch motif, PF00646: F-box domain];[AT2G44140, autophagy 4a (APG4a) identi
D	D		AT2G40000	expressed protein
24 h AND 14 d
	I	I	AT1G51140	basic helix-loop-helix (bHLH) family protein contains Pfam profile: PF00010 helix-loop-helix DNA-binding domain
	I	I	AT5G33370	GDSL-motif lipase/hydrolase family protein similar to family II lipase EXL3 (GI:15054386), EXL1 (GI:15054382), EXL2 (GI:15054384) [Arabidopsis thaliana]; contains Pfam profile PF00657: Lipase/Acylhydrolase with GDSL-like motif
	I	I	AT5G67030	zeaxanthin epoxidase (ZEP) (ABA1) identical to GI:9857296 AtABA1; controls Pfam profiles PF01360: Monooxygenase and PF00498: FHA domain; identical to cDNA AtABA1, GI:9857295
	I	I	AT5G49730;AT5G49740	[AT5G49730, ferric reductase-like transmembrane component family protein similar to ferric-chelate reductase (FRO1) [Pisum sativum] GI:15341529; contains Pfam profile PF01794: Ferric reductase like transmembrane componenent];[AT5G49740, ferric reductase
	I	I	AT5G24150	squalene monooxygenase 1,1 / squalene epoxidase 1,1 (SQP1,1) identical to SP|O65404
	I	I	AT5G13750	transporter-related
	I	I	AT5G12110	elongation factor 1B alpha-subunit 1 (eEF1Balpha1) identical to elongation factor 1B alpha-subunit [Arabidopsis thaliana] GI:6686819
	I	I	AT5G02940	expressed protein
	I	I	AT1G70610	ABC transporter (TAP1) contains Pfam profile: PF00005 ABC transporters; similar to TAP1 protein (transporter of processed antigen) GB:AAD53033 (Oncorhynchus mykiss); identical to cDNA transporter associated with antigen processing-like protein (TAP1) GI:
	I	D	AT5G20790	expressed protein predicted protein, Arabidopsis thaliana
	I	D	AT5G63140	calcineurin-like phosphoesterase family protein contains Pfam profile: PF00149 calcineurin-like phosphoesterase
	I	D	AT4G30610	serine carboxypeptidase S10 family protein similar to Serine carboxypeptidase II chains A and B (SP:P08819) (EC 3.4.16.6) [Triticum aestivum (Wheat)];
	I	D	AT4G01310	ribosomal protein L5 family protein contains Pfam profiles PF00673: ribosomal L5P family C-terminus, PF00281: ribosomal protein L5
	I	D	AT1G56430	nicotianamine synthase, putative similar to nicotianamine synthase [Lycopersicon esculentum][GI:4753801], nicotianamine synthase 2 [Hordeum vulgare][GI:4894912]
	I	D	AT1G78630	ribosomal protein L13 family protein similar to ribosomal protein L13 GI:170132 from [Spinacia oleracea]
	D	I	AT4G15530	pyruvate phosphate dikinase family protein contains Pfam profiles: PF01326 pyruvate phosphate dikinase, PEP/pyruvate binding domain, PF02896 PEP-utilizing enzyme, TIM barrel domain
	D	I	AT5G64120	peroxidase, putative identical to peroxidase [Arabidopsis thaliana] gi|1483222|emb|CAA67551
	D	I	AT5G62680;AT5G62670	[AT5G62680, proton-dependent oligopeptide transport (POT) family protein contains Pfam profile: PF00854 POT family];[AT5G62670, ATPase, plasma membrane-type, putative / proton pump, putative strong similarity to P-type H(+)-transporting ATPase from Nico
	D	I	AT5G42650	allene oxide synthase (AOS) / hydroperoxide dehydrase / cytochrome P450 74A (CYP74A) identical to Allene oxide synthase, chloroplast precursor (Hydroperoxide dehydrase) (Cytochrome P450 74A) (SP:Q96242) {Arabidopsis thaliana}
	D	I	AT5G39520	expressed protein predicted protein, Synechocystis sp., PIR:S77152
	D	I	AT5G05600	oxidoreductase, 2OG-Fe(II) oxygenase family protein similar to flavonol synthase [Citrus unshiu][gi:4126403], leucoanthocyanidin dioxygenase [Daucus carota][gi:5924383]; contains PF03171 2OG-Fe(II) oxygenase superfamily domain
	D	I	AT5G05110	cysteine protease inhibitor, putative / cystatin, putative similar to cysteine proteinase inhibitor [Glycine max] GI:1944342; contains Pfam profile PF00031: Cystatin domain
	D	I	AT4G37530;AT4G37520	[AT4G37530, peroxidase, putative similar to peroxidase [Arabidopsis thaliana] gi|1402906|emb|CAA66958; identical to Pfam profile PF00141: Peroxidase; identical to cDNA peroxidase ATP37 GI:18874553];[AT4G37520, peroxidase 50 (PER50) (P50) (PRXR2) identic
	D	I	AT4G34230	cinnamyl-alcohol dehydrogenase, putative similar to cinnamyl alcohol dehydrogenase, Nicotiana tabacum [SP|P30359], Populus deltoides, PATCHX:G288753
	D	I	AT4G33150	lysine-ketoglutarate reductase/saccharopine dehydrogenase bifunctional enzyme identical to lysine-ketoglutarate reductase/saccharopine dehydrogenase GI:2052508 from [Arabidopsis thaliana]
	D	I	AT4G24000	cellulose synthase family protein similar to cellulose synthase from Gossypium hirsutum [gi:1706956], cellulose synthase-5 from Zea mays [gi:9622882]
	D	I	AT4G22212	expressed protein
	D	I	AT4G19420	pectinacetylesterase family protein contains Pfam profile: PF03283 pectinacetylesterase
	D	I	AT4G01610	cathepsin B-like cysteine protease, putative similar to cathepsin B-like cysteine proteinase GI:609175 from [Nicotiana rustica]; contains an unusually short, 5nt exon
	D	I	AT1G69490	no apical meristem (NAM) family protein similar to N-term half of NAC domain protein NAM [Arabidopsis thaliana] GI:4325282
	D	I	AT3G18830	mannitol transporter, putative similar to mannitol transporter [Apium graveolens var. dulce] GI:12004316; contains Pfam profile PF00083: major facilitator superfamily protein
	D	I	AT3G01970	WRKY family transcription factor similar to WRKY1 GB:AAC49527 [Petroselinum crispum]
	D	I	AT3G09390	metallothionein protein, putative (MT2A) identical to Swiss-Prot:P25860 metallothionein-like protein 2A (MT-2A) (MT-K) (MT-1G) [Arabidopsis thaliana]
	D	I	AT2G43535	trypsin inhibitor, putative similar to SP|P26780 Trypsin inhibitor 2 precursor (MTI-2) {Sinapis alba}
	D	I	AT1G21100;AT1G21130;AT1G21110	[AT1G21100, O-methyltransferase, putative similar to GI:2781394];[AT1G21130, O-methyltransferase, putative similar to GI:2781394];[AT1G21110, O-methyltransferase, putative similar to GI:2781394]
	D	I	AT1G70810	C2 domain-containing protein similar to zinc finger and C2 domain protein GI:9957238 from [Arabidopsis thaliana]
	D	I	AT1G17020	oxidoreductase, 2OG-Fe(II) oxygenase family protein similar to flavonol synthase [Petunia x hybrida][GI:311658], leucoanthocyanidin dioxygenase [Malus domestica][SP|P51091]; contains PF03171 2OG-Fe(II) oxygenase superfamily domain
	D	I	AT1G14960	major latex protein-related / MLP-related low similarity to major latex protein {Papaver somniferum}[GI:20810] contains Pfam profile PF00407: Pathogenesis-related protein Bet v I family
	D	I	AT1G14890	invertase/pectin methylesterase inhibitor family protein similar to pectinesterase GB:X85216 GI:732912 SP|Q43111 [Phaseolus vulgaris], SP|Q42534 from Arabidopsis thaliana; contains Pfam profile PF04043: Plant invertase/pectin methylesterase inhibitor
	D	I	AT2G26750;AT2G26740	[AT2G26750, epoxide hydrolase, putative strong similarity to ATsEH [Arabidopsis thaliana] GI:1109600];[AT2G26740, epoxide hydrolase, soluble (sEH) identical to ATsEH [Arabidopsis thaliana] GI:1109600]
	D	D	AT5G08330	TCP family transcription factor, putative similar to PCF1 (GI:2580438) and PCF2 [(GI:2580440) Oryza sativa] ; auxin-induced basic helix-loop-helix transcription factor, Gossypium hirsutum, EMBL:AF165924
	D	D	AT5G20250	raffinose synthase family protein / seed imbibition protein, putative (din10) similar to seed imbibition protein GB:AAA32975 GI:167100 from [Hordeum vulgare]; contains nonconsensus AT donor splice site at intron 1; contains Pfam profile PF05691: Raffinos
	D	D	AT5G44130	fasciclin-like arabinogalactan-protein, putative similar to gi_13377784_gb_AAK20861
	D	D	AT3G45970;AT3G45980	[AT3G45970, expansin family protein (EXPL1) similar to cim1 induced allergen, Glycine max, EMBL:U03860; expansin-like gene, PMID:11641069, www.bio.psu.edu/expansins];[AT3G45980, histone H2B identical to histone H2B Arabidopsis thaliana GI:2407802; conta
	D	D	AT4G23400	major intrinsic family protein / MIP family protein contains Pfam profile: MIP PF00230
	D	D	AT4G08950	phosphate-responsive protein, putative (EXO) similar to phi-1 (phosphate-induced gene) [Nicotiana tabacum] GI:3759184; contains Pfam profile PF04674: Phosphate-induced protein 1 conserved region
	D	D	AT1G25560	AP2 domain-containing transcription factor, putative similar to DNA-binding protein RAV2 GI:3868859 from [Arabidopsis thaliana]
	D	D	AT3G30775	proline oxidase, mitochondrial / osmotic stress-responsive proline dehydrogenase (POX) (PRO1) (ERD5) nearly identical to SP|P92983 Proline oxidase, mitochondrial precursor (EC 1.5.3.-) (Osmotic stress- induced proline dehydrogenase) [Arabidopsis thaliana
	D	D	AT3G07470	expressed protein contains Pfam profile PF04398: Protein of unknown function, DUF538
	D	D	AT1G22500	zinc finger (C3HC4-type RING finger) family protein contains Pfam profile: PF00097: Zinc finger, C3HC4 type (RING finger)
	D	D	AT1G78820	curculin-like (mannose-binding) lectin family protein / PAN domain-containing protein similar to S locus glycoprotein [Brassica rapa] GI:12246840; contains Pfam profile PF01453: Lectin (probable mannose binding)
	D	D	AT1G24530	transducin family protein / WD-40 repeat family protein similar to Vegetatible incompatibility protein HET-E-1 (SP:Q00808) {Podospora anserina}; contains 7 WD-40 repeats (PF00400)
	D	D	AT2G30930	expressed protein
6 h AND 14 d
I		I	AT4G15440	hydroperoxide lyase (HPL1) identical to hydroperoxide lyase GI:3822403 from [Arabidopsis thaliana]
I		I	AT1G06430	FtsH protease, putative similar to zinc dependent protease GI:7650138 from [Arabidopsis thaliana]
I		I	AT1G64970	expressed protein
I		I	AT2G20570	golden2-like transcription factor (GLK1) identical to golden2-like transcription factor GI:13311003 from [Arabidopsis thaliana]; contains Pfam profile: PF00249 Myb-like DNA-binding domain
I		D	AT5G51460	trehalose-6-phosphate phosphatase (TPPA) identical to trehalose-6-phosphate phosphatase (AtTPPA) [Arabidopsis thaliana] GI:2944178
D		D	AT5G25280	serine-rich protein-related contains some similarity to serine-rich proteins
D		D	AT5G37260	myb family transcription factor contains Pfam profile: PF00249 myb-like DNA-binding domain
D		D	AT5G14130;AT5G14120	[AT5G14130, peroxidase, putative identical to peroxidase ATP20a [Arabidopsis thaliana] gi|1546694|emb|CAA67338];[AT5G14120, nodulin family protein similar to nodulin-like protein [Arabidopsis thaliana] GI:3329368, nodule-specific protein Nlj70 [Lotus ja
D		D	AT3G48360	speckle-type POZ protein-related contains Pfam PF00651 : BTB/POZ domain; similar to Speckle-type POZ protein (SP:O43791) [Homo sapiens]
D		D	AT1G68840	DNA-binding protein RAV2 (RAV2) / AP2 domain-containing protein RAP2.8 identical to RAV2 GI:3868859 from [Arabidopsis thaliana], AP2 domain containing protein RAP2.8 [Arabidopsis thaliana] GI:2281641; contains Pfam profile: PF00847 AP2-domain
D		D	AT1G23390	kelch repeat-containing F-box family protein similar to hypothetical protein GB:AAF27090 GI:6730669 from (Arabidopsis thaliana); contains Pfam profiles PF01344: Kelch motif, PF00646: F-box domain
D		D	AT1G78450	SOUL heme-binding family protein weak similarity to SOUL protein [Mus musculus] GI:4886906; contains Pfam profile PF04832: SOUL heme-binding protein
D		D	AT2G39570	ACT domain-containing protein contains Pfam ACT domain PF01842
