# Supplementary material for: Dissecting regulatory pathways of G1/S control in Arabidopsis: common and distinct targets of CYCD3;1, E2Fa and E2Fc
Source: Springer Nature journal article supplement (doi:10.1007/s11103-009-9527-5), 2009-08-06
Supplement: MOESM16 [file 11103_2009_9527_MOESM16_ESM.xls]

## Sheet: CYCD3_6h
probe_ID_25K	locus	P_call_cycD3_all	P_call_cycD3_6h	robust change call_cycD3_6h	NC_cycD3_6h (dupl)	NC_EV (cycD3)_6h (dupl)	Modulated Candidate	EV_6h_3A_Signal	EV_6h_3B_Signal	EV_6h_3_average_Signal	EV_6h_3A_Detection	EV_6h_3B_Detection	EV_6h_3A_Detection p-value	EV_6h_3B_Detection p-value	D3_6h_9A_Signal	D3_6h_9B_Signal	D3_6h_9_average_Signal	D3_6h_9A_Detection	D3_6h_9B_Detection	D3_6h_9A_Detection p-value	D3_6h_9B_Detection p-value	C34_9A_v_3A_Signal Log Ratio	C35_9A_v_3B_Signal Log Ratio	C36_9B_v_3A_Signal Log Ratio	C37_9B_v_3B_Signal Log Ratio	average_SLR_6h_D3_vs_EV	StDev_SLR_6h_D3_vs_EV	C34_9A_v_3A_Change	C35_9A_v_3B_Change	C36_9B_v_3A_Change	C37_9B_v_3B_Change	change call_all_comparison_6h	C13_3B_v_3A_SLR	C46_9B_v_9A_Signal Log Ratio	C13_3B_v_3A_Change	C46_9B_v_9A_Change	affy25k_array_elements-2004-04-_locus	description
244936_at	ATCG01100	12	4		NC	NC	MC_D	5636.2	7688.8	6662.5	P	P	0.000244	0.000244	6683.4	6091.6	6387.5	P	P	0.000244	0.000244	-0.3	-0.5	-0.1	-0.4	-0.325	0.170783	D	D	NC	D	3	0.3	0.2	NC	NC	ATCG01100	ndhA NADH dehydrogenase ND1
244934_at	ATCG01080	12	4		NC	NC	MC_D	1193.3	1392.4	1292.85	P	P	0.00293	0.001221	963.9	939.4	951.65	P	P	0.00293	0.001953	-0.3	-0.6	-0.3	-0.6	-0.45	0.173205	NC	D	D	D	1	0.3	0	NC	NC	ATCG01080	ndhG NADH dehydrogenase ND6
244932_at	ATCG01060	12	4		NC	NC	MC_D	1345.3	1522.4	1433.85	P	P	0.000244	0.000244	1346.4	1140.4	1243.4	P	P	0.000732	0.000244	-0.2	-0.4	-0.4	-0.5	-0.375	0.125831	NC	D	D	D	1	0.1	-0.1	NC	NC	ATCG01060	psaC PSI 9KDa protein
244939_at	ATCG00900;ATCG00905;ATCG01230;ATCG00065	12	4		NC	NC	MC_D	1421.9	1537.4	1479.65	P	P	0.000732	0.000732	1029.2	1201.1	1115.15	P	P	0.001221	0.000732	-0.7	-0.8	-0.3	-0.3	-0.525	0.262996	D	D	NC	D	3	0.1	0.5	NC	NC	ATCG00900;ATCG00905;ATCG01230;ATCG00065	[ATCG00900, rps7.1 ribosomal protein S12];[ATCG00905, rps12c rps12.3];[ATCG01230, rps12b rps12.2];[ATCG00065, rps12a rps12.1]
245019_at	ATCG00530	12	4		NC	NC	MC_D	16371.5	17626.2	16998.8	P	P	0.000244	0.000244	12870.9	13740.1	13305.5	P	P	0.000244	0.000244	-0.3	-0.6	-0.2	-0.4	-0.375	0.170783	D	D	NC	D	3	0.3	0.1	NC	NC	ATCG00530	ycf10 hypothetical protein
245011_at	ATCG00430	12	4	D	NC		MC_D	2599.7	2994.2	2796.95	P	P	0.000244	0.000244	2145.6	1883.7	2014.65	P	P	0.000244	0.000244	-0.4	-0.8	-0.3	-0.7	-0.55	0.238048	D	D	D	D	4	0.4	0.1	I	NC	ATCG00430	psbG photosystem II G protein
247025_at	AT5G67030	12	4		NC	NC	MC_D	3631.6	3997.4	3814.5	P	P	0.000732	0.000732	2910.7	2943.1	2926.9	P	P	0.000732	0.000732	-0.3	-0.5	-0.3	-0.4	-0.375	0.0957427	D	D	NC	D	3	0.1	0.1	NC	NC	AT5G67030	zeaxanthin epoxidase (ZEP) (ABA1) identical to GI:9857296 AtABA1; controls Pfam profiles PF01360: Monooxygenase and PF00498: FHA domain; identical to cDNA AtABA1, GI:9857295
247056_at	AT5G66750	12	4		NC	NC	MC_I	194.5	253.9	224.2	P	P	0.000732	0.005859	400.6	392.1	396.35	P	P	0.001221	0.000732	0.8	0.4	0.7	0.5	0.6	0.182574	I	I	I	MI	3	0.3	0	NC	NC	AT5G66750	SNF2 domain-containing protein / helicase domain-containing protein similar to proliferation-associated SNF2-like protein [Homo sapiens] GI:8980660; contains Pfam profiles PF00271: Helicase conserved C-terminal domain, PF00176: SNF2 family N-terminal dom
247094_at	AT5G66280	12	4		NC	NC	MC_I	683.5	609.5	646.5	P	P	0.000732	0.000732	851.2	803.5	827.35	P	P	0.000244	0.000244	0.2	0.3	0.3	0.4	0.3	0.0816497	NC	I	I	I	1	0	0.2	NC	NC	AT5G66280	GDP-D-mannose 4,6-dehydratase, putative strong similarity to GDP-D-mannose-4,6-dehydratase [Arabidopsis thaliana] GI:1764100
247279_at	AT5G64310	12	4		NC	NC	MC_I	1873.2	2063.3	1968.25	P	P	0.00415	0.001953	2586.8	2408.1	2497.45	P	P	0.000732	0.001221	0.6	0.5	0.3	0.2	0.4	0.182574	I	I	I	NC	3	0.2	-0.3	NC	NC	AT5G64310	arabinogalactan-protein (AGP1) identical to gi:3883120 gb:AAC77823
247440_at	AT5G62680;AT5G62670	12	4		NC	NC	MC_D	3323	3311.9	3317.45	P	P	0.000244	0.000244	2529.8	2267.5	2398.65	P	P	0.000244	0.000244	-0.4	-0.4	-0.6	-0.6	-0.5	0.11547	D	NC	D	D	3	0	-0.2	NC	NC	AT5G62680;AT5G62670	[AT5G62680, proton-dependent oligopeptide transport (POT) family protein contains Pfam profile: PF00854 POT family];[AT5G62670, ATPase, plasma membrane-type, putative / proton pump, putative strong similarity to P-type H(+)-transporting ATPase from Nico
247847_at	AT5G58110	12	4		NC	NC	MC_I	2261.9	2328.2	2295.05	P	P	0.000244	0.000244	2696.8	2755.2	2726	P	P	0.000244	0.000244	0.2	0.2	0.3	0.2	0.225	0.05	NC	I	I	I	1	0	0	NC	NC	AT5G58110	expressed protein predicted proteins, Homo sapiens and Drosophila melanogaster
247902_at	AT5G57350	12	4		NC	NC	MC_D	2269.1	2813.8	2541.45	P	P	0.000244	0.000244	2132.8	1991.3	2062.05	P	P	0.000244	0.000244	-0.1	-0.4	-0.3	-0.5	-0.325	0.170783	NC	D	MD	D	1	0.3	0	NC	NC	AT5G57350	ATPase 3, plasma membrane-type / proton pump 3 nearly identical to SP|P20431 ATPase 3, plasma membrane-type (EC 3.6.3.6) (Proton pump 3) {Arabidopsis thaliana}; contains InterPro accession IPR001757: ATPase, E1-E2 type
247935_at	AT5G56940	12	4		NC	NC	MC_I	2196.7	2084.6	2140.65	P	P	0.000244	0.000244	2882.1	2470.4	2676.25	P	P	0.000244	0.000244	0.5	0.4	0.3	0.2	0.35	0.129099	I	I	NC	I	3	0	-0.3	NC	NC	AT5G56940	ribosomal protein S16 family protein contains Pfam profile PF00886: ribosomal protein S16
247972_at	AT5G56740	12	4		NC	NC	MC_I	732.8	590.3	661.55	P	P	0.010742	0.008057	790.5	1014.1	902.3	P	P	0.00293	0.001221	0.3	0.4	0.4	0.3	0.35	0.057735	NC	I	I	I	1	0	-0.1	NC	NC	AT5G56740	histone acetyltransferase family protein similar to histone acetyltransferase HAT B [Zea mays] GI:5579441; identical to cDNA histone acetyltransferase partial cds GI:21637256
247962_at	AT5G56580	12	4		NC	NC	MC_I	202.9	272.9	237.9	P	P	0.030273	0.008057	448.1	479.7	463.9	P	P	0.000732	0.00293	0.6	0.5	0.7	0.4	0.55	0.129099	I	I	I	NC	3	0.2	-0.1	NC	NC	AT5G56580	mitogen-activated protein kinase kinase (MAPKK), putative (MKK6) similar to NQK1 MAPKK [Nicotiana tabacum] gi|12718822|dbj|BAB32405; mitogen-activated protein kinase kinase (MAPKK) family, PMID:12119167
248282_at	AT5G52900	12	4		NC	NC	MC_D	1152	888.6	1020.3	P	P	0.000244	0.000732	563.9	858.8	711.35	P	P	0.001953	0.001953	-0.9	-0.6	-0.4	-0.2	-0.525	0.298608	D	D	D	NC	3	-0.2	0.4	NC	NC	AT5G52900	expressed protein
248448_at	AT5G51190	11	4		NC	NC	MC_I	534.7	562.5	548.6	P	P	0.000732	0.000732	736.4	632.2	684.3	P	P	0.000244	0.000732	0.5	0.7	0.3	0.5	0.5	0.163299	I	I	NC	I	3	-0.1	-0.2	NC	NC	AT5G51190	AP2 domain-containing transcription factor, putative contains similarity to ethylene responsive element binding factor
248624_at	AT5G48790	12	4		NC	NC	MC_D	2508.1	3073.6	2790.85	P	P	0.000244	0.000244	1829.2	2495.7	2162.45	P	P	0.000244	0.000244	-0.4	-0.6	-0.1	-0.3	-0.35	0.208167	D	D	NC	D	3	0.2	0.3	NC	NC	AT5G48790	expressed protein
248951_at	AT5G45550	12	4		NC	NC	MC_D	2081.8	2294	2187.9	P	P	0.000732	0.000244	1772.6	1728.4	1750.5	P	P	0.000732	0.000732	-0.6	-0.5	-0.3	-0.3	-0.425	0.15	NC	D	MD	D	1	0	0.3	NC	NC	AT5G45550	mob1/phocein family protein contains Pfam profile: PF03637 Mob1/phocein family
249101_at	AT5G43580	12	4		NC	NC	MC_I	837.7	678.5	758.1	P	P	0.001953	0.00293	887	1111.7	999.35	P	P	0.000732	0.000732	0.1	0.6	0.5	0.8	0.5	0.294392	NC	MI	I	I	1	-0.3	0.3	NC	NC	AT5G43580	protease inhibitor, putative similar to SP|P19873 Inhibitor of trypsin and hageman factor (CMTI-V) {Cucurbita maxima}; contains Pfam profile PF00280: Potato inhibitor I family
249125_at	AT5G43450	12	4		NC	NC	MC_D	1207.9	1276.1	1242	P	P	0.00293	0.001953	824.6	767.6	796.1	P	P	0.00293	0.00415	-0.5	-0.4	-0.5	-0.6	-0.5	0.0816497	NC	D	D	D	1	0	-0.1	NC	NC	AT5G43450	2-oxoglutarate-dependent dioxygenase, putative similar to 2A6 (GI:599622) and tomato ethylene synthesis regulatory protein E8 (SP|P10967)
249490_s_at	AT5G39120;AT5G39150;AT5G39180;AT5G39110	12	4		NC	NC	MC_I	600.5	526.7	563.6	P	P	0.001953	0.000244	839.1	917.2	878.15	P	P	0.000244	0.001221	0.4	0.5	0.5	0.7	0.525	0.125831	NC	MI	I	I	1	-0.1	0.1	NC	NC	AT5G39120;AT5G39150;AT5G39180;AT5G39110	[AT5G39120, germin-like protein, putative similar to germin -like protein GLP6, Arabidopsis thaliana, EMBL:ATU75194 [SP|P92997]];[AT5G39150, germin-like protein, putative similar to germin -like protein GLP6, Arabidopsis thaliana, EMBL:ATU75194 [SP|P929
246700_at	AT5G28030	12	4		NC	NC	MC_D	605	747	676	P	P	0.000732	0.000732	431.3	467.2	449.25	P	P	0.00415	0.001953	-0.5	-0.8	-0.3	-0.7	-0.575	0.221736	D	D	NC	D	3	0.3	0.2	NC	NC	AT5G28030	cysteine synthase, putative / O-acetylserine (thiol)-lyase, putative / O-acetylserine sulfhydrylase, putative similar to O-acetylserine(thiol) lyase [Brassica juncea] GI:2245144; contains Pfam profile PF00291: Pyridoxal-phosphate dependent enzyme
249826_at	AT5G23310	12	4		NC	NC	MC_I	1490.5	2005.1	1747.8	P	P	0.000244	0.000732	2267.4	2188.6	2228	P	P	0.000244	0.000244	0.3	0.2	0.5	0.3	0.325	0.125831	I	NC	I	I	3	0.2	0.1	NC	NC	AT5G23310	superoxide dismutase [Fe] / iron superoxide dismutase 3 (FSD3) identical to iron superoxide dismutase 3 [Arabidopsis thaliana] gi|3273757|gb|AAC24834
249997_at	AT5G18620	12	4		NC	NC	MC_I	580.1	489.3	534.7	P	P	0.000244	0.000244	870.6	643.5	757.05	P	P	0.000244	0.000244	0.4	0.7	0.4	0.4	0.475	0.15	I	I	MI	I	3	0	-0.3	NC	NC	AT5G18620	DNA-dependent ATPase, putative similar to DNA-dependent ATPase SNF2H [Mus musculus] GI:14028669; contains Pfam profiles PF00271: Helicase conserved C-terminal domain, PF00176: SNF2 family N-terminal domain, PF00249: Myb-like DNA-binding domain
250059_at	AT5G17820	12	4		NC	NC	MC_I	2380.6	2188.4	2284.5	P	P	0.000732	0.001953	2907.5	2872	2889.75	P	P	0.000244	0.000244	0	0.3	0.4	0.6	0.325	0.25	NC	I	I	I	1	-0.2	0.3	NC	NC	AT5G17820	peroxidase 57 (PER57) (P57) (PRXR10) identical to SP|Q43729 Peroxidase 57 precursor (EC 1.11.1.7) (Atperox P57) (PRXR10) (ATP13a) {Arabidopsis thaliana}
250475_at	AT5G10180	12	4		NC	NC	MC_D	2164.4	1907.3	2035.85	P	P	0.000244	0.000244	1435.8	1397.4	1416.6	P	P	0.000244	0.000244	-0.3	-0.4	-0.4	-0.4	-0.375	0.05	D	D	NC	D	3	0.1	0	NC	NC	AT5G10180	sulfate transporter identical to sulfate transporter [Arabidopsis thaliana] GI:2114104
250469_at	AT5G10130	12	4		NC	NC	MC_I	906.1	1129.7	1017.9	P	P	0.000732	0.000732	1263.1	1303.6	1283.35	P	P	0.000732	0.000732	0.6	0.3	0.5	0.3	0.425	0.15	I	NC	I	I	3	0.1	0	NC	NC	AT5G10130	pollen Ole e 1 allergen and extensin family protein contains similarity to pollen specific protein C13 precursor [Zea mays] SWISS-PROT:P33050
245690_at	AT5G04230	12	4		NC	NC	MC_D	973.6	858.6	916.1	P	P	0.000732	0.000244	627.2	688.2	657.7	P	P	0.000244	0.000732	-0.4	-0.5	-0.3	-0.3	-0.375	0.0957427	NC	MD	D	D	1	-0.1	0.1	NC	NC	AT5G04230	phenylalanine ammonia-lyase 3 (PAL3) nearly identical to SP|P45725
253233_at	AT4G34290	12	4		NC	NC	MC_I	3530.3	3266.5	3398.4	P	P	0.000244	0.000244	4354.2	3814	4084.1	P	P	0.000244	0.000244	0.4	0.5	0.1	0.2	0.3	0.182574	I	I	NC	I	3	-0.1	-0.3	NC	NC	AT4G34290	SWIB complex BAF60b domain-containing protein contains Pfam profile PF02201: BAF60b domain of the SWIB complex
253403_at	AT4G32830	12	4		NC	NC	MC_I	623.8	815	719.4	P	P	0.000244	0.000732	1106	1031.7	1068.85	P	P	0.000244	0.000244	0.8	0.6	0.7	0.2	0.575	0.262996	I	I	I	NC	3	0.5	-0.2	NC	NC	AT4G32830	protein kinase, putative similar to protein kinase p46XlEg22 [Xenopus laevis] gi|609280|emb|CAA78914; contains protein kinase domain, Pfam:PF00069
253480_at	AT4G31840	12	4		NC	NC	MC_I	1583.9	1709.7	1646.8	P	P	0.000244	0.000244	2372.4	2256.9	2314.65	P	P	0.000244	0.000244	0.5	0.4	0.5	0.4	0.45	0.057735	I	NC	I	I	3	0.2	-0.1	NC	NC	AT4G31840	plastocyanin-like domain-containing protein
253666_at	AT4G30270	12	4		NC	NC	MC_D	18654.7	16400.9	17527.8	P	P	0.000244	0.000244	14839.8	13304.9	14072.4	P	P	0.000244	0.000244	-0.4	-0.3	-0.5	-0.3	-0.375	0.0957427	D	NC	D	D	3	-0.1	-0.1	NC	NC	AT4G30270	MERI-5 protein (MERI-5) (MERI5B) / endo-xyloglucan transferase / xyloglucan endo-1,4-beta-D-glucanase (SEN4) identical to endo-xyloglucan transferase gi:944810, SP|P24806 MERI-5 protein precursor (Endo-xyloglucan transferase) (Xyloglucan endo-1,4-beta-D-
253981_at	AT4G26670	12	4		NC	NC	MC_I	2725.3	2399	2562.15	P	P	0.000244	0.000244	3182.4	3134.2	3158.3	P	P	0.000244	0.000244	0.3	0.5	0.2	0.3	0.325	0.125831	I	I	NC	I	3	-0.1	-0.1	NC	NC	AT4G26670	mitochondrial import inner membrane translocase subunit Tim17/Tim22/Tim23 family protein weak similarity to SP|Q9Z0V8 Mitochondrial import inner membrane translocase subunit TIM17 A {Mus musculus}; contains Pfam profile PF02466: Mitochondrial import inne
254396_at	AT4G21680	12	4		NC	NC	MC_D	1128.4	985	1056.7	P	P	0.000244	0.000244	600.8	938	769.4	P	P	0.000244	0.000244	-0.7	-0.5	-0.4	-0.2	-0.45	0.208167	D	D	D	NC	3	-0.2	0.1	NC	NC	AT4G21680	proton-dependent oligopeptide transport (POT) family protein contains Pfam profile: PF00854 POT family
245262_at	AT4G16563	12	4		NC	NC	MC_D	1239.2	956.5	1097.85	P	P	0.000244	0.000244	818.1	805	811.55	P	P	0.000244	0.000244	-0.2	-0.2	-0.4	-0.3	-0.275	0.0957427	D	NC	D	D	3	0	-0.1	NC	NC	AT4G16563	aspartyl protease family protein contains Pfam profile: PF00026 eukaryotic aspartyl protease
255331_at	AT4G04330	12	4		NC	NC	MC_I	966.3	1035	1000.65	P	P	0.000732	0.000732	1362.3	1703.5	1532.9	P	P	0.000244	0.000244	0.4	0.2	0.5	0.5	0.4	0.141421	MI	NC	I	I	1	0.2	0.2	NC	NC	AT4G04330	expressed protein
255413_at	AT4G03140	12	4		NC	NC	MC_D	421	547.3	484.15	P	P	0.00415	0.001953	288.6	325.1	306.85	P	P	0.008057	0.01416	-0.2	-0.5	-0.4	-0.6	-0.425	0.170783	NC	D	D	D	1	0.4	-0.3	NC	NC	AT4G03140	short-chain dehydrogenase/reductase (SDR) family protein similar to stem secoisolariciresinol dehydrogenase GI:13752458 from {Forsythia x intermedia}; similar to sex determination protein tasselseed 2 SP:P50160 from [Zea mays]
255626_at	AT4G00780	12	4		NC	NC	MC_D	1655.1	2149.6	1902.35	P	P	0.000244	0.000244	1399.6	1572.4	1486	P	P	0.000244	0.000244	-0.6	-0.9	-0.3	-0.5	-0.575	0.25	D	D	NC	D	3	0.3	0.3	NC	NC	AT4G00780	meprin and TRAF homology domain-containing protein / MATH domain-containing protein contains Pfam profile PF00917: MATH domain
251226_at	AT3G62680	12	4		NC	NC	MC_I	1513.5	1490.7	1502.1	P	P	0.001953	0.001221	1978.7	1985.6	1982.15	P	P	0.001221	0.000732	0.4	0.2	0.5	0.4	0.375	0.125831	I	NC	I	I	3	0	0.1	NC	NC	AT3G62680	proline-rich family protein contains proline-rich region, INTERPRO:IPR000694
251221_at	AT3G62550	12	4		NC	NC	MC_I	3354.5	3965.4	3659.95	P	P	0.000244	0.000244	4811.9	6036.5	5424.2	P	P	0.000244	0.000244	0.4	0.4	0.6	0.5	0.475	0.0957427	MI	I	I	I	1	0	0.2	NC	NC	AT3G62550	universal stress protein (USP) family protein similar to ER6 protein [Lycopersicon esculentum] GI:5669654; contains Pfam profile PF00582: universal stress protein family
251297_at	AT3G62020	12	4		NC	NC	MC_D	485.9	652.3	569.1	P	P	0.000244	0.000244	340.7	524.9	432.8	P	P	0.000732	0.000732	-0.4	-0.7	0	-0.4	-0.375	0.287228	D	D	NC	D	3	0.2	0.4	NC	NC	AT3G62020	germin-like protein (GLP10) identical to germin-like protein subfamily 2 member 4 [SP|Q9M263]
251436_at	AT3G59900	12	4		NC	NC	MC_I	335.3	278	306.65	P	P	0.005859	0.018555	205.4	394.6	300	P	P	0.000732	0.000732	0.2	0.4	0.1	0.3	0.25	0.129099	I	I	NC	I	3	-0.1	-0.2	NC	NC	AT3G59900	expressed protein hypothetical protein At2g44080 - Arabidopsis thaliana, EMBL:AC004005
251629_at	AT3G57410	12	4		NC	NC	MC_D	1000.5	899.1	949.8	P	P	0.001953	0.00415	891.4	761.6	826.5	P	P	0.01416	0.018555	-0.4	-0.3	-0.4	-0.4	-0.375	0.05	D	MD	D	D	3	-0.1	-0.1	NC	NC	AT3G57410	villin 3 (VLN3) nearly identical to villin 3 (VLN3) [Arabidopsis thaliana] GI:3415117
251869_at	AT3G54500	12	4		NC	NC	MC_D	543.4	585.8	564.6	P	P	0.000244	0.000244	412.3	332.3	372.3	P	P	0.000244	0.000244	-0.3	-0.5	-0.6	-0.6	-0.5	0.141421	D	D	NC	D	3	0.1	-0.2	NC	NC	AT3G54500	expressed protein
256674_at	AT3G52360	12	4		NC	NC	MC_I	1358.8	1254.3	1306.55	P	P	0.008057	0.00293	1613.6	1478.7	1546.15	P	P	0.00293	0.00415	0.2	0.3	0.2	0.2	0.225	0.05	I	I	NC	I	3	0	-0.1	NC	NC	AT3G52360	expressed protein
252367_at	AT3G48360	12	4		NC	NC	MC_I	4071.2	4378	4224.6	P	P	0.000732	0.000732	4852.4	5637.7	5245.05	P	P	0.000732	0.000732	0.4	0.2	0.6	0.3	0.375	0.170783	I	NC	I	I	3	0.1	0.3	NC	NC	AT3G48360	speckle-type POZ protein-related contains Pfam PF00651 : BTB/POZ domain; similar to Speckle-type POZ protein (SP:O43791) [Homo sapiens]
252643_at	AT3G44590	12	4		NC	NC	MC_I	9326.7	10219.3	9773	P	P	0.000244	0.000244	11739.2	10866.9	11303	P	P	0.000244	0.000244	0.4	0.2	0.2	0.1	0.225	0.125831	I	I	I	NC	3	0.2	-0.1	NC	NC	AT3G44590	60S acidic ribosomal protein P2 (RPP2D) acidic ribosomal protein P2, maize, PIR:S54179
256589_at	AT3G28730;AT3G28740	12	4	D		NC	MC_D	2038.8	1913.2	1976	P	P	0.000244	0.000244	1476.3	1084.7	1280.5	P	P	0.000244	0.000244	-0.4	-0.3	-0.9	-0.8	-0.6	0.294392	D	D	D	D	4	0	-0.5	NC	D	AT3G28730;AT3G28740	[AT3G28730, structure-specific recognition protein 1 / high mobility group protein / HMG protein nearly identical to SP|Q05153 Structure-specific recognition protein 1 homolog (HMG protein) {Arabidopsis thaliana}; contains Pfam profile PF00505: HMG (high
257628_at	AT3G26290	12	4		NC	NC	MC_D	1234.4	1226.8	1230.6	P	P	0.000244	0.000244	803.9	965.3	884.6	P	P	0.000244	0.000244	-0.5	-0.5	-0.3	-0.4	-0.425	0.0957427	D	D	NC	D	3	0	0.3	NC	NC	AT3G26290	cytochrome P450 71B26, putative (CYP71B26) identical to cytochrome P450 71B26 (SP:Q9LTL0) [Arabidopsis thaliana]; contains Pfam profile: PF00067 cytochrome P450
258138_at	AT3G24495	12	4		NC	NC	MC_I	423.6	414	418.8	P	P	0.001221	0.001221	479.2	580.3	529.75	P	P	0.000732	0.000732	0.5	0.2	0.7	0.6	0.5	0.216025	I	NC	I	I	3	0.1	0.2	NC	NC	AT3G24495	DNA mismatch repair protein MSH6-2 (MSH7) identical to SP|Q9SMV7 DNA mismatch repair protein MSH6-2 (AtMsh6-2) (MutS homolog 7) {Arabidopsis thaliana}; GC donor splice site at exon 11
256890_at	AT3G23830	12	4		NC	NC	MC_I	3206.9	2939.8	3073.35	P	P	0.000244	0.000244	4330.2	3713	4021.6	P	P	0.000244	0.000732	0.4	0.6	0.3	0.3	0.4	0.141421	I	I	NC	I	3	-0.1	-0.1	NC	NC	AT3G23830	glycine-rich RNA-binding protein, putative similar to Glycine-rich RNA-binding protein 2, mitochondrial precursor (AtGRP2) (Swiss-Prot:Q9SVM8) [Arabidopsis thaliana]; contains Pfam profile: PF00076 RNA recognition motif. (a.k.a. RRM, RBD, or RNP domain)
258033_at	AT3G21250	12	4		NC	NC	MC_D	1896.7	1946.9	1921.8	P	P	0.000244	0.000244	1406.1	1624.4	1515.25	P	P	0.000244	0.000244	-0.4	-0.4	-0.3	-0.3	-0.35	0.057735	D	D	NC	D	3	0	0	NC	NC	AT3G21250	ABC transporter family protein similar to MRP-like ABC transporter GB:AAC49791 from [Arabidopsis thaliana]
256569_at	AT3G19550	12	4		NC	NC	MC_D	358.9	382.8	370.85	P	P	0.000732	0.00293	163	196.7	179.85	P	P	0.023926	0.046143	-0.6	-0.6	-0.3	-0.7	-0.55	0.173205	D	NC	D	D	3	0.4	0.1	NC	NC	AT3G19550	expressed protein
257057_at	AT3G15310;AT5G32621	12	4		NC	NC	MC_D	362	293.6	327.8	P	P	0.000732	0.000244	230.1	235.3	232.7	P	P	0.000732	0.001221	-0.4	-0.4	-0.4	-0.8	-0.5	0.2	NC	MD	D	D	1	0.1	-0.1	NC	NC	AT3G15310;AT5G32621	[AT3G15310, expressed protein];[AT5G32621, expressed protein contains Pfam profile PF04827: Protein of unknown function (DUF635)]
256983_at	AT3G13470	12	4		NC	NC	MC_I	7618.1	8393.1	8005.6	P	P	0.000244	0.000244	10920.1	9425.8	10173	P	P	0.000244	0.000244	0.4	0.3	0.2	0.1	0.25	0.129099	I	I	I	NC	3	0.1	-0.2	NC	NC	AT3G13470	chaperonin, putative similar SWISS-PROT:P21240- RuBisCO subunit binding-protein beta subunit, chloroplast precursor (60 kDa chaperonin beta subunit, CPN-60 beta) [Arabidopsis thaliana]; contains Pfam:PF00118 domain, TCP-1/cpn60 chaperonin family
259347_at	AT3G03920	12	4		NC	NC	MC_I	5176.1	4887.2	5031.65	P	P	0.000244	0.000244	6895	5562.4	6228.7	P	P	0.000244	0.000244	0.4	0.5	0.1	0.3	0.325	0.170783	I	I	NC	MI	2	-0.1	-0.3	NC	NC	AT3G03920	Gar1 RNA-binding region family protein contains Pfam profile PF04410: Gar1 protein RNA binding region
258612_at	AT3G02920	12	4		NC	NC	MC_I	550.5	627.3	588.9	P	P	0.000244	0.000244	873.7	785.6	829.65	P	P	0.000244	0.000244	0.8	0.6	0.6	0.3	0.575	0.206155	I	I	I	NC	3	0.1	-0.3	NC	NC	AT3G02920	replication protein-related similar to replication protein A 30kDa [Oryza sativa (japonica cultivar-group)] GI:13516746; contains InterPro entry IPR004365: OB-fold nucleic acid binding domain
258480_at	AT3G02640	12	4	I		NC	MC_I	766.3	1070.8	918.55	P	P	0.000244	0.001953	2033.5	1466.1	1749.8	P	P	0.000244	0.000732	0.9	0.8	0.7	0.5	0.725	0.170783	I	I	I	I	4	0.1	-0.3	NC	D	AT3G02640	expressed protein
266719_at	AT2G46830	12	4		NC	NC	MC_D	435.4	571.9	503.65	P	P	0.008057	0.008057	418.3	453.9	436.1	P	P	0.005859	0.023926	-0.2	-0.6	-0.3	-0.5	-0.4	0.182574	NC	D	D	D	1	0.3	0.1	NC	NC	AT2G46830	myb-related transcription factor (CCA1) identical to myb-related transcription factor (CCA1) GI:4090569 from [Arabidopsis thaliana]
245148_at	AT2G45220	11	4		NC	NC	MC_I	1047.9	911.8	979.85	P	P	0.010742	0.018555	781.3	1025.2	903.25	P	P	0.001953	0.001953	0.1	0.4	0.3	0.7	0.375	0.25	NC	I	I	I	1	-0.3	0.2	NC	NC	AT2G45220	pectinesterase family protein contains Pfam profile: PF01095 pectinesterase
266889_at	AT2G44640	12	4		NC	NC	MC_I	2160.7	2050	2105.35	P	P	0.000732	0.000732	2540.2	2700.9	2620.55	P	P	0.000732	0.000732	0.4	0.4	0.3	0.3	0.35	0.057735	MI	MI	I	NC	2	0	-0.2	NC	NC	AT2G44640	expressed protein
245106_at	AT2G41650	12	4		NC	NC	MC_I	719.6	701.9	710.75	P	P	0.000244	0.000244	970	1042.6	1006.3	P	P	0.000244	0.000244	0.5	0.4	0.4	0.5	0.45	0.057735	I	NC	I	I	3	0.1	0	NC	NC	AT2G41650	expressed protein
263829_at	AT2G40435	12	4		NC	NC	MC_D	323.2	274.9	299.05	P	P	0.000244	0.000732	165.2	165.2	165.2	P	P	0.000732	0.000244	-0.9	-0.7	-1.2	-0.8	-0.9	0.216025	D	D	MD	NC	2	0	0	NC	NC	AT2G40435	expressed protein
263264_at	AT2G38810	12	4	I		NC	MC_I	379	380.7	379.85	P	P	0.001953	0.000732	1044.7	814.8	929.75	P	P	0.000244	0.000732	1.3	1.4	0.9	0.9	1.125	0.262996	I	I	I	I	4	0.1	-0.3	NC	D	AT2G38810	histone H2A, putative strong similarity to histone H2A.F/Z Arabidopsis thaliana GI:2407800; contains Pfam profile PF00125 Core histone H2A/H2B/H3/H4
267524_at	AT2G30600	12	4		NC	NC	MC_D	922.6	1027.5	975.05	P	P	0.000244	0.000244	788.7	742.7	765.7	P	P	0.000732	0.000732	-0.5	-0.6	-0.4	-0.5	-0.5	0.0816497	D	D	NC	D	3	0	0.1	NC	NC	AT2G30600	BTB/POZ domain-containing protein contains Pfam PF00651: BTB/POZ domain; contains Interpro IPR000210/ PS50097: BTBB/POZ domain; similar to MigA (GI:1841872) [Dictyostelium discoideum]
267523_at	AT2G30600	12	4		NC	NC	MC_D	1589.7	1613.8	1601.75	P	P	0.001953	0.001221	1105	1276.9	1190.95	P	P	0.001953	0.001953	-0.5	-0.6	-0.2	-0.3	-0.4	0.182574	D	D	MD	D	3	0.1	0.2	NC	NC	AT2G30600	BTB/POZ domain-containing protein contains Pfam PF00651: BTB/POZ domain; contains Interpro IPR000210/ PS50097: BTBB/POZ domain; similar to MigA (GI:1841872) [Dictyostelium discoideum]
266295_at	AT2G29550	12	4		NC	NC	MC_I	1499.4	1549.9	1524.65	P	P	0.000244	0.000244	2117.8	1823.7	1970.75	P	P	0.000244	0.000244	0.6	0.4	0.5	0.3	0.45	0.129099	I	I	I	NC	3	0.2	-0.2	NC	NC	AT2G29550	tubulin beta-7 chain (TUB7) identical to GB:M84704 SP|P29515 Tubulin beta-7 chain {Arabidopsis thaliana}
263570_at	AT2G27150	12	4		NC	NC	MC_D	437.5	514.4	475.95	P	P	0.000244	0.000244	411.7	321.1	366.4	P	P	0.000244	0.000732	-0.1	-0.4	-0.4	-0.5	-0.35	0.173205	NC	D	D	D	1	0.2	0	NC	NC	AT2G27150	aldehyde oxidase 3 (AAO3) identical to GP:3172044:gnl:PID:d1029570:AB010080
267121_at	AT2G23540	12	4		NC	NC	MC_I	1338.4	1494.8	1416.6	P	P	0.000244	0.000244	1439.2	1679.6	1559.4	P	P	0.000244	0.000244	0.5	0.2	0.6	0.4	0.425	0.170783	I	NC	I	I	3	0.3	0.2	NC	NC	AT2G23540	GDSL-motif lipase/hydrolase family protein similar to family II lipase EXL1 GI:15054382 from [Arabidopsis thaliana]; contains Pfam profile PF00657: GDSL-like Lipase/Acylhydrolase
265383_at	AT2G16780	12	4	I		NC	MC_I	588.2	450.8	519.5	P	P	0.000244	0.000244	998.1	806.5	902.3	P	P	0.000244	0.000244	0.8	0.9	0.6	0.6	0.725	0.15	I	I	I	I	4	0.1	-0.2	NC	D	AT2G16780	WD-40 repeat protein (MSI2) contains 5 WD-40 repeats (PF0400); identical to WD-40 repeat protein MSI2 (SP:O22468) [Arabidopsis thaliana] WD-40 repeats (PF0400);
263612_at	AT2G16440	12	4	I		NC	MC_I	446.6	525.5	486.05	P	P	0.000244	0.000244	1017.9	737.8	877.85	P	P	0.000244	0.000244	1.2	0.7	0.7	0.6	0.8	0.270801	I	I	I	I	4	0.3	-0.4	NC	MD	AT2G16440	DNA replication licensing factor, putative similar to SP|P49717 DNA replication licensing factor MCM4 (CDC21 homolog) {Mus musculus}, SP|P29458 Cdc21 protein {Schizosaccharomyces pombe}; contains Pfam profile PF00493: MCM2/3/5 family
265511_at	AT2G05540	12	4		NC	NC	MC_D	1926.5	1588.8	1757.65	P	P	0.000244	0.000244	1405.5	1295.5	1350.5	P	P	0.000244	0.000244	-0.5	-0.2	-0.7	-0.4	-0.45	0.208167	D	NC	D	D	3	-0.2	-0.3	NC	NC	AT2G05540	glycine-rich protein
262201_at	AT2G01120	12	4		NC	NC	MC_I	527.9	589.3	558.6	P	P	0.001953	0.001953	668	603.1	635.55	P	P	0.001221	0.000244	0.6	0.4	0.3	0.5	0.45	0.129099	I	NC	I	I	3	0.2	0	NC	NC	AT2G01120	origin recognition complex subunit 4, putative (ORC4) similar to origin recognition complex subunit 4 (GI:15866782) [Zea mays]
262045_at	AT1G80240	12	4		NC	NC	MC_I	891.3	677.4	784.35	P	P	0.000244	0.000244	1387.2	1195.3	1291.25	P	P	0.000244	0.000244	0.5	0.6	0.3	0.4	0.45	0.129099	MI	I	NC	I	1	-0.3	-0.1	NC	NC	AT1G80240	expressed protein contains Pfam profile PF04862: Protein of unknown function, DUF642
262043_at	AT1G80190	12	4		NC	NC	MC_I	365.6	435.7	400.65	P	P	0.010742	0.01416	695.7	514.4	605.05	P	P	0.001953	0.00415	0.5	0.7	0.6	0.6	0.6	0.0816497	I	I	I	NC	3	-0.1	-0.3	NC	NC	AT1G80190	expressed protein
259911_at	AT1G72680	12	4		NC	NC	MC_D	1425.1	1366.3	1395.7	P	P	0.000244	0.000244	1075.7	1127.2	1101.45	P	P	0.000244	0.000244	-0.4	-0.4	-0.2	-0.3	-0.325	0.0957427	D	D	NC	D	3	0.1	0.1	NC	NC	AT1G72680	cinnamyl-alcohol dehydrogenase, putative similar to cinnamyl-alcohol dehydrogenase GB:AAC35846 [Medicago sativa], SP|Q08350 [Picea abies]
260208_s_at	AT1G70670	12	4		NC	NC	MC_D	1312.1	1513.6	1412.85	P	P	0.000244	0.001953	911.6	986.7	949.15	P	P	0.005859	0.001953	-0.5	-0.4	-0.3	-0.3	-0.375	0.0957427	D	D	MD	D	3	0	0.4	NC	NC	AT1G70670	caleosin-related family protein similar to Ca+2-binding EF hand protein GB:AAB71227 [Glycine max]; contains Pfam profile PF05042: Caleosin related protein
259690_at	AT1G63160	12	4		NC	NC	MC_I	641	575.5	608.25	P	P	0.01416	0.00293	858.6	773.4	816	P	P	0.000732	0.001953	0.5	0.5	0.2	0.3	0.375	0.15	I	I	NC	I	3	-0.1	-0.2	NC	NC	AT1G63160	replication factor C 40 kDa, putative similar to SWISS-PROT:Q9WUK4 activator 1 40 kDa subunit (Replication factor C 40 kDa subunit, A1 40 kDa subunit, RF-C 40 kDa subunit, RFC40) [Mus musculus]
256352_at	AT1G54970	12	4		NC	NC	MC_I	508.4	619.6	564	P	P	0.000732	0.000732	767.5	801.1	784.3	P	P	0.000732	0.000732	0.6	0.2	0.6	0.4	0.45	0.191485	I	NC	I	I	3	0.3	0.1	NC	NC	AT1G54970	proline-rich family protein similar to proline-rich protein GI:170048 from [Glycine max]
259609_at	AT1G52410	12	4		NC	NC	MC_D	1047.5	957.8	1002.65	P	P	0.00293	0.01416	598.6	719.8	659.2	P	P	0.018555	0.005859	-0.7	-0.5	-0.6	-0.3	-0.525	0.170783	D	D	D	NC	3	-0.2	0.2	NC	NC	AT1G52410	caldesmon-related weak similarity to Caldesmon (CDM) (Swiss-Prot:P12957) [Gallus gallus]
265048_at	AT1G52050	12	4		NC	NC	MC_I	1450.1	1891.7	1670.9	P	P	0.000244	0.000244	1838.1	2078	1958.05	P	P	0.000244	0.000244	0.4	0.3	0.5	0.4	0.4	0.0816497	I	NC	I	I	3	0	0.1	NC	NC	AT1G52050	jacalin lectin family protein similar to myrosinase-binding protein homolog [Arabidopsis thaliana] GI:2997767; contains Pfam profile PF01419 jacalin-like lectin domain
262427_s_at	AT1G47600;AT1G51470	12	4		NC	NC	MC_I	1738	1994.1	1866.05	P	P	0.000732	0.000732	2117.6	2389.9	2253.75	P	P	0.000244	0.000732	0.3	0.2	0.5	0.3	0.325	0.125831	I	NC	I	I	3	0.2	0.2	NC	NC	AT1G47600;AT1G51470	[AT1G47600, glycosyl hydrolase family 1 protein contains Pfam PF00232 : Glycosyl hydrolase family 1 domain; TIGRFAM TIGR01233: 6-phospho-beta-galactosidase; similar to thioglucosidase (GI:871992) [Arabidopsis thaliana]];[AT1G51470, glycosyl hydrolase fa
261330_at	AT1G44900	12	4	I	NC		MC_I	403.2	480.3	441.75	P	P	0.008057	0.00415	690.9	636.2	663.55	P	P	0.00293	0.00293	0.8	0.7	1	0.6	0.775	0.170783	I	I	I	I	4	0.3	-0.1	I	NC	AT1G44900	DNA replication licensing factor, putative similar to DNA replication licensing factor MCM2 from {Xenopus laevis} SP|P55861, SP|P49736 {Homo sapiens}; contains Pfam profile PF00493: MCM2/3/5 family
245244_at	AT1G44350	12	4		NC	NC	MC_D	1776	1984.5	1880.25	P	P	0.000244	0.000732	1424.3	1302.6	1363.45	P	P	0.000244	0.000244	-0.3	-0.5	-0.3	-0.5	-0.4	0.11547	NC	D	D	D	1	0.2	-0.1	NC	NC	AT1G44350	IAA-amino acid hydrolase 6, putative (ILL6) / IAA-Ala hydrolase, putative virtually identical to gr1-protein from [Arabidopsis thaliana] GI:3559811; similar to IAA-amino acid hydrolase GI:3421384 from [Arabidopsis thaliana]; contains TIGRfam profile TIGR
259546_at	AT1G35350	12	4		NC	NC	MC_D	641.5	630.8	636.15	P	P	0.000244	0.000732	660.1	425.2	542.65	P	P	0.000244	0.000244	-0.5	-0.3	-0.8	-0.4	-0.5	0.216025	MD	NC	D	D	1	-0.2	-0.1	NC	NC	AT1G35350	EXS family protein / ERD1/XPR1/SYG1 family protein similar to PHO1 protein [Arabidopsis thaliana] GI:20069032; contains Pfam profiles PF03105: SPX domain, PF03124: EXS family
261159_s_at	AT1G34460	12	4		NC	NC	MC_I	158.2	144.4	151.3	P	P	0.001953	0.000244	290.2	276.3	283.25	P	P	0.000732	0.001953	0.8	0.9	0.6	0.5	0.7	0.182574	I	I	I	NC	3	-0.1	-0.1	NC	NC	AT1G34460	cyclin, putative strong similarity to cyclin [Arabidopsis thaliana] GI:1360646
261648_at	AT1G27730	12	4		NC	NC	MC_I	1707.2	1312	1509.6	P	P	0.000732	0.001221	1853.9	1512.1	1683	P	P	0.000244	0.000244	0.3	0.6	0.1	0.3	0.325	0.206155	I	I	NC	I	3	-0.2	-0.3	NC	NC	AT1G27730	zinc finger (C2H2 type) family protein (ZAT10) / salt-tolerance zinc finger protein (STZ) identical to salt-tolerance zinc finger protein GB:CAA64820 GI:1565227 from [Arabidopsis thaliana]; contains Pfam domain, PF00096: Zinc finger, C2H2 type; identical
264438_at	AT1G27400	12	4		NC	NC	MC_I	9078.3	9988.3	9533.3	P	P	0.000244	0.000244	11302	9786.5	10544.2	P	P	0.000244	0.000244	0.4	0.3	0.2	0.1	0.25	0.129099	I	I	MI	NC	2	0.1	-0.2	NC	NC	AT1G27400	60S ribosomal protein L17 (RPL17A) similar to GB:P51413 from [Arabidopsis thaliana]; similar to ESTs gb|L33542 and gb|AA660016
260656_at	AT1G19380	12	4		NC	NC	MC_D	4658.8	3940.7	4299.75	P	P	0.000244	0.000244	3596.8	3315.4	3456.1	P	P	0.000244	0.000244	-0.3	-0.1	-0.5	-0.2	-0.275	0.170783	D	NC	D	D	3	-0.2	-0.2	NC	NC	AT1G19380	expressed protein
256125_at	AT1G18250	12	4		NC	NC	MC_I	877.3	1033.6	955.45	P	P	0.001953	0.000732	1620.8	1226.6	1423.7	P	P	0.000244	0.001221	0.8	0.6	0.5	0.2	0.525	0.25	I	I	I	NC	3	0.2	-0.1	NC	NC	AT1G18250	thaumatin, putative identical to SP|P50699 Thaumatin-like protein precursor {Arabidopsis thaliana}; strong similarity to pathogenesis-related group 5 protein GI:2749943 from [Brassica rapa]
262713_at	AT1G16520	12	4		NC	NC	MC_I	625	689.4	657.2	P	P	0.00415	0.00293	726.3	728.6	727.45	P	P	0.000244	0.000732	0.8	0.3	0.7	0.2	0.5	0.294392	I	MI	I	I	3	0.4	-0.3	NC	NC	AT1G16520	expressed protein
261480_at	AT1G14280	12	4		NC	NC	MC_D	457.7	627.2	542.45	P	P	0.023926	0.00415	381.2	404.4	392.8	P	P	0.01416	0.046143	-0.3	-0.7	-0.4	-0.7	-0.525	0.206155	NC	D	D	D	1	0.2	-0.2	NC	NC	AT1G14280	phytochrome kinase, putative contains similarity to Swiss-Prot:Q9SWI1 phytochrome kinase substrate 1 [Arabidopsis thaliana]
259537_at	AT1G12370	12	4		NC	NC	MC_I	228	239.5	233.75	P	P	0.01416	0.030273	399.8	412.9	406.35	P	P	0.00415	0.001953	0.8	0.7	0.7	0.6	0.7	0.0816497	I	NC	I	MI	2	0	-0.1	NC	NC	AT1G12370	type II CPD photolyase PHR1 (PHR1) nearly identical to type II CPD photolyase PHR1 [Arabidopsis thaliana] GI:2984707; similar to class II DNA photolyase (GI:5081541) [Chlamydomonas reinhardtii]; supporting cDNA gi|2984706|gb|AF053365.1|AF053365
262109_at	AT1G02730	12	4		NC	NC	MC_I	1112.7	1354.1	1233.4	P	P	0.000732	0.000244	1634.4	1468.9	1551.65	P	P	0.000244	0.000244	0.7	0.5	0.5	0.3	0.5	0.163299	I	NC	I	MI	2	0.3	-0.2	NC	NC	AT1G02730	cellulose synthase family protein similar to cellulose synthase catalytic subunit [gi:13925881] from Nicotiana alata, cellulose synthase-4 [gi:9622880] from Zea mays
259443_at	AT1G02360	12	4		NC	NC	MC_I	809.9	632.7	721.3	P	P	0.000244	0.000244	1128.7	865.8	997.25	P	P	0.000244	0.000244	0.5	0.6	0.2	0.4	0.425	0.170783	I	I	NC	I	3	-0.2	-0.3	NC	NC	AT1G02360	chitinase, putative similar to chitinase precursor GI:5880845 from [Petroselinum crispum]
261569_at	AT1G01060	12	4		NC	NC	MC_D	1147.4	1287.1	1217.25	P	P	0.000244	0.000244	891.9	757.1	824.5	P	P	0.000244	0.000244	-0.4	-0.7	-0.6	-0.8	-0.625	0.170783	NC	D	D	D	1	0.3	-0.2	NC	NC	AT1G01060	myb family transcription factor contains Pfam profile: PF00249 myb-like DNA-binding domain; identical to cDNA LATE ELONGATED HYPOCOTYL MYB transcription factor GI:3281845
AFFX-Athal-25SrRNA_s_at		11	4		NC	NC	MC_I	155.4	257.2	206.3	P	P	0.008689	0.007543	292	191.3	241.65	P	P	0.000805	0.002617	0.9	0.5	0.9	0.2	0.625	0.340343	I	I	I	NC	3	0.4	-0.3	NC	NC
AFFX-CreX-3_at		12	4		NC	NC	MC_I	17155.2	17590.4	17372.8	P	P	4.4e-05	4.4e-05	22523.5	19516.9	21020.2	P	P	4.4e-05	4.4e-05	0.4	0.5	0.2	0.2	0.325	0.15	I	I	NC	MI	2	0	-0.3	NC	NC

## Sheet: CYCD3_24h
probe_ID_25K	locus	P_call_cycD3_all	P_call_cycD3_24h	robust change call_cycD3_24h	NC_cycD3_24h (dupl)	NC_EV (cycD3)_24h (dupl)	Modulated Candidate	EV_24h_11A_Signal	EV_24h_11B_Signal	EV_24h_11_average_Signal	EV_24h_11A_Detection	EV_24h_11B_Detection	EV_24h_11A_Detection p-value	EV_24h_11B_Detection p-value	D3_24h_17A_Signal	D3_24h_17B_Signal	D3_24h_17_average_Signal	D3_24h_17A_Detection	D3_24h_17B_Detection	D3_24h_17A_Detection p-value	D3_24h_17B_Detection p-value	C38_17A_v_11A_Signal Log Ratio	C39_17A_v_11B_Signal Log Ratio	C40_17B_v_11A_Signal Log Ratio	C41_17B_v_11B_Signal Log Ratio	average_SLR_24h_D3_vs_EV	StDev_SLR_24h_D3_vs_EV	C38_17A_v_11A_Change	C39_17A_v_11B_Change	C40_17B_v_11A_Change	C41_17B_v_11B_Change	change call_all_comparison_24h	C15_11B_v_11A_Signal Log Ratio	C47_17B_v_17A_Signal Log Ratio	C15_11B_v_11A_Change	C47_17B_v_17A_Change	affy25k_array_elements-2004-04-_locus	description
265228_s_at	ATMG01190;AT2G07698	12	4		NC	NC	MC_D	789.9	995	892.45	P	P	0.000244	0.000244	922.6	727.6	825.1	P	P	0.001953	0.00293	-0.2	-0.3	-0.5	-0.7	-0.425	0.221736	D	NC	D	D	3	0.1	-0.2	NC	NC	ATMG01190;AT2G07698	[ATMG01190, atp1 ATPase subunit 1];[AT2G07698, ATP synthase alpha chain, mitochondrial, putative very strong similarity to SP|P23413 ATP synthase alpha chain, mitochondrial (EC 3.6.3.14) {Brassica campestris}; contains Pfam profiles PF00006: ATP synthas
244996_at	ATCG00160	12	4		NC	NC	MC_I	7070.1	4841.6	5955.85	P	P	0.000732	0.000244	9412.5	7172.3	8292.4	P	P	0.000244	0.000732	0.4	0.7	0.1	0.4	0.4	0.244949	I	I	NC	I	3	-0.3	-0.3	NC	NC	ATCG00160	rps2 ribosomal protein S2
247036_at	AT5G67130	12	4		NC	NC	MC_I	804.7	815.7	810.2	P	P	0.000732	0.000244	1603.4	1187.5	1395.45	P	P	0.000244	0.000244	0.6	0.5	0.6	0.4	0.525	0.0957427	I	I	I	MI	3	0	-0.2	NC	NC	AT5G67130	expressed protein
247098_at	AT5G66470	12	4		NC	NC	MC_I	2395.2	2319.2	2357.2	P	P	0.001221	0.000244	2314	2969.4	2641.7	P	P	0.000732	0.000244	0.4	0.4	0.5	0.5	0.45	0.057735	MI	I	I	I	1	-0.1	-0.1	NC	NC	AT5G66470	expressed protein
247138_at	AT5G66120	12	4		NC	NC	MC_D	5423.2	5603.3	5513.25	P	P	0.000244	0.000244	4019.9	4302	4160.95	P	P	0.000244	0.000244	-0.3	-0.6	-0.2	-0.5	-0.4	0.182574	D	D	NC	D	3	0.2	0.1	NC	NC	AT5G66120	3-dehydroquinate synthase, putative similar to aroB [Neisseria gonorrhoeae][GI:2661441]; contains 3-dehydroquinate synthase domain PF01761
247120_at	AT5G65990;AT5G66000	12	4		NC	NC	MC_D	2394	2483	2438.5	P	P	0.000244	0.000244	1694.7	1931.9	1813.3	P	P	0.000244	0.000244	-0.4	-0.5	-0.2	-0.4	-0.375	0.125831	D	D	NC	D	3	0	0.1	NC	NC	AT5G65990;AT5G66000	[AT5G65990, amino acid transporter family protein similar to proton/amino acid transporter 1 [Mus musculus] GI:21908024; contains Pfam profile PF01490: Transmembrane amino acid transporter protein];[AT5G66000, expressed protein]
247149_at	AT5G65660	12	4		NC	NC	MC_I	7273.4	6897.2	7085.3	P	P	0.000244	0.000244	8283.2	10038.4	9160.8	P	P	0.000244	0.000244	0.2	0.3	0.3	0.4	0.3	0.0816497	NC	I	MI	I	1	-0.1	0.1	NC	NC	AT5G65660	hydroxyproline-rich glycoprotein family protein
247220_at	AT5G64960	12	4		NC	NC	MC_I	939.2	990.2	964.7	P	P	0.00415	0.005859	1105.7	1457.7	1281.7	P	P	0.00293	0.00415	0.3	0.3	0.5	0.4	0.375	0.0957427	I	NC	I	I	3	0	0.3	NC	NC	AT5G64960	cyclin-dependent kinase, putative / CDK, putative similar to cyclin dependent kinase C [Lycopersicon esculentum] gi|15215944|emb|CAC51391
247232_at	AT5G64940	12	4		NC	NC	MC_I	2645.9	2718.9	2682.4	P	P	0.000732	0.000732	3909.5	3320.2	3614.85	P	P	0.000732	0.000732	0.5	0.5	0.3	0.3	0.4	0.11547	I	I	NC	I	3	0	-0.2	NC	NC	AT5G64940	ABC1 family protein contains Pfam domain, PF03109: ABC1 family
247222_at	AT5G64840	12	4		NC	NC	MC_I	3871	3618.3	3744.65	P	P	0.000244	0.000244	5081	4619.4	4850.2	P	P	0.000244	0.000244	0.5	0.5	0.3	0.3	0.4	0.11547	I	I	NC	I	3	0	-0.2	NC	NC	AT5G64840	ABC transporter family protein
247278_at	AT5G64380	12	4		NC	NC	MC_I	834.6	875.5	855.05	P	P	0.000244	0.000244	1357.1	1122.2	1239.65	P	P	0.000732	0.000244	0.5	0.3	0.6	0.6	0.5	0.141421	I	NC	I	I	3	0.1	-0.1	NC	NC	AT5G64380	fructose-1,6-bisphosphatase family protein similar to SP|P22418 Fructose-1,6-bisphosphatase, chloroplast precursor (EC 3.1.3.11) (D-fructose-1,6-bisphosphate 1-phosphohydrolase) (FBPase) {Spinacia oleracea}; contains Pfam profile PF00316: fructose-1,6-bi
247310_at	AT5G63950	10	4		NC	NC	MC_I	114.4	315.3	214.85	P	P	0.023926	0.046143	326.3	277.3	301.8	P	P	0.023926	0.030273	1.5	0.3	1.2	0	0.75	0.714143	I	I	I	NC	3	0.9	-0.3	NC	NC	AT5G63950	SNF2 domain-containing protein / helicase domain-containing protein low similarity to SP|Q03468 Excision repair protein ERCC-6 (Cockayne syndrome protein CSB) {Homo sapiens}; contains PFam profiles PF00271: Helicase conserved C-terminal domain, PF00176:
247385_at	AT5G63420	12	4		NC	NC	MC_I	630.9	674.9	652.9	P	P	0.001953	0.000244	1003.8	990.7	997.25	P	P	0.000244	0.001221	0.6	0.5	0.6	0.4	0.525	0.0957427	I	NC	I	MI	2	0.4	0	NC	NC	AT5G63420	metallo-beta-lactamase family protein
247362_at	AT5G63140	12	4		NC	NC	MC_I	501.2	450.1	475.65	P	P	0.000244	0.000244	707	565.8	636.4	P	P	0.000244	0.000244	0.7	0.9	0.1	0.5	0.55	0.341565	I	I	NC	I	3	-0.2	-0.4	NC	NC	AT5G63140	calcineurin-like phosphoesterase family protein contains Pfam profile: PF00149 calcineurin-like phosphoesterase
247418_at	AT5G63030	12	4		NC	NC	MC_D	793.4	766.8	780.1	P	P	0.000732	0.000732	552.1	191.6	371.85	P	P	0.00415	0.00293	-0.4	-0.3	-0.9	-0.8	-0.6	0.294392	D	NC	D	D	3	0.2	-0.5	NC	NC	AT5G63030	glutaredoxin, putative similar to glutaredoxin [Ricinus communis] gi|1732424|emb|CAA89699
247442_s_at	AT5G62700;AT5G62690	12	4		NC	NC	MC_I	7299.8	6682.5	6991.15	P	P	0.000244	0.000244	8128	7354.8	7741.4	P	P	0.000244	0.000244	0.4	0.2	0.3	0.1	0.25	0.129099	I	I	MI	NC	2	0.2	-0.1	NC	NC	AT5G62700;AT5G62690	[AT5G62700, tubulin beta-2/beta-3 chain (TUB3) nearly identical to SP|P29512 Tubulin beta-2/beta-3 chain {Arabidopsis thaliana}];[AT5G62690, tubulin beta-2/beta-3 chain (TUB2) nearly identical to SP|P29512 Tubulin beta-2/beta-3 chain {Arabidopsis thalia
247429_at	AT5G62620	12	4		NC	NC	MC_I	579.3	508.1	543.7	P	P	0.001953	0.008057	671.2	495	583.1	P	P	0.000732	0.001953	0.5	0.6	0.1	0.6	0.45	0.238048	I	I	NC	I	3	-0.2	-0.1	NC	NC	AT5G62620	galactosyltransferase family protein contains Pfam profile: PF01762 galactosyltransferase
247555_at	AT5G61020	12	4		NC	NC	MC_I	2608.4	3192.8	2900.6	P	P	0.000244	0.000244	3914.4	3169.8	3542.1	P	P	0.000244	0.000244	0.5	0.2	0.3	0.2	0.3	0.141421	I	I	I	NC	3	0.2	-0.1	NC	NC	AT5G61020	YT521-B-like family protein contains Pfam profile PF04146: YT521-B-like family
247609_at	AT5G60940	12	4		NC	NC	MC_I	383.6	464	423.8	P	P	0.001221	0.000732	526.6	552.6	539.6	P	P	0.000244	0.000244	0.6	0.3	0.4	0.1	0.35	0.208167	I	I	I	NC	3	0.2	-0.3	NC	NC	AT5G60940	transducin family protein / WD-40 repeat family protein contains 6 WD-40 repeats (PF00400); similar to cleavage stimulation factor 50K chain Homo sapiens, PIR:A45142
247656_at	AT5G59890	12	4		NC	NC	MC_D	5132.1	5219.2	5175.65	P	P	0.000244	0.000244	4174.3	4003.4	4088.85	P	P	0.000244	0.000244	-0.6	-0.4	-0.5	-0.5	-0.5	0.0816497	D	NC	D	D	3	-0.2	0	NC	NC	AT5G59890	actin-depolymerizing factor 4 (ADF4) identical to SP|Q9ZSK3 Actin-depolymerizing factor 4 (ADF-4) (AtADF4) {Arabidopsis thaliana}
247698_at	AT5G59830	12	4		NC	NC	MC_I	543.8	448.8	496.3	P	P	0.000244	0.000244	674.7	646.2	660.45	P	P	0.000244	0.000244	0.4	0.5	0.3	0.6	0.45	0.129099	I	I	NC	I	3	0	0	NC	NC	AT5G59830	expressed protein
247725_at	AT5G59410	12	4		NC	NC	MC_D	1436.6	1702.3	1569.45	P	P	0.000244	0.000732	1026.4	1300.8	1163.6	P	P	0.000732	0.000244	-0.5	-0.6	-0.3	-0.3	-0.425	0.15	D	D	D	NC	3	0	0.2	NC	NC	AT5G59410	expressed protein
247718_at	AT5G59310	12	4	D	NC		MC_D	5355.8	4441.7	4898.75	P	P	0.000244	0.000244	377.3	307.6	342.45	P	P	0.018555	0.000732	-3.8	-3.6	-3.6	-3.4	-3.6	0.163299	D	D	D	D	4	-0.2	0.4	D	NC	AT5G59310	lipid transfer protein 4 (LTP4) identical to lipid transfer protein 4 from Arabidopsis thaliana [gi:8571923]; contains Pfam protease inhibitor/seed storage/LTP family domain PF00234
247780_at	AT5G58770	12	4	I	NC		MC_I	739.2	431.5	585.35	P	P	0.00415	0.030273	1079.5	1214.7	1147.1	P	P	0.000244	0.000244	0.7	1.3	0.6	1.4	1	0.408248	I	I	I	I	4	-0.7	0	D	NC	AT5G58770	dehydrodolichyl diphosphate synthase, putative / DEDOL-PP synthase, putative similar to GI:796076
247834_at	AT5G58490	12	4		NC	NC	MC_D	4582.2	4890	4736.1	P	P	0.000244	0.000244	3702.9	3643.7	3673.3	P	P	0.000244	0.000244	-0.2	-0.5	-0.2	-0.4	-0.325	0.15	D	D	NC	D	3	0.2	0	NC	NC	AT5G58490	cinnamoyl-CoA reductase family similar to cinnamoyl-CoA reductase from Pinus taeda [GI:17978649], Eucalyptus gunnii [GI:2058311]
247819_at	AT5G58350	12	4		NC	NC	MC_D	1535.4	1464.4	1499.9	P	P	0.000732	0.001221	1225.1	1215.3	1220.2	P	P	0.000732	0.00293	-0.3	-0.4	-0.2	-0.3	-0.3	0.0816497	D	D	D	NC	3	0.1	0.1	NC	NC	AT5G58350	protein kinase family protein contains protein kinase domain, Pfam:PF00069
247814_at	AT5G58310	12	4		NC	NC	MC_D	867.1	793.7	830.4	P	P	0.000244	0.000244	436.9	578.1	507.5	P	P	0.001221	0.000244	-0.5	-0.8	-0.5	-0.6	-0.6	0.141421	D	D	MD	NC	2	0	0.1	NC	NC	AT5G58310	hydrolase, alpha/beta fold family protein low similarity to SP|Q40708 PIR7A protein {Oryza sativa}, polyneuridine aldehyde esterase [Rauvolfia serpentina] GI:6651393, ethylene-induced esterase [Citrus sinensis] GI:14279437; contains Pfam profile PF00561:
247806_at	AT5G58270	12	4		NC	NC	MC_I	1463.7	1429.1	1446.4	P	P	0.000244	0.000244	1886.5	2206.8	2046.65	P	P	0.000244	0.000244	0.4	0.3	0.6	0.5	0.45	0.129099	I	NC	I	I	3	0.2	0.2	NC	NC	AT5G58270	mitochondrial half-ABC transporter (STA1) identical to half-molecule ABC transporter ATM3 GI:9964121 from [Arabidopsis thaliana]; almost identical to mitochondrial half-ABC transporter STA1 GI:9187883 from [Arabidopsis thaliana]; identical to cDNA mitoch
247891_at	AT5G57960	12	4		NC	NC	MC_I	530.4	544.8	537.6	P	P	0.000244	0.000732	931.1	755	843.05	P	P	0.000244	0.000244	0.7	0.9	0.3	0.7	0.65	0.251661	I	I	NC	I	3	-0.2	-0.2	NC	NC	AT5G57960	GTP-binding family protein similar to SP|P25519 GTP-binding protein hflX {Escherichia coli}
247865_at	AT5G57815	12	4		NC	NC	MC_D	3400.2	2389.9	2895.05	P	P	0.000244	0.000244	2361.1	2191.8	2276.45	P	P	0.000244	0.000244	-0.5	-0.2	-0.5	-0.4	-0.4	0.141421	D	NC	D	MD	2	-0.2	0	NC	NC	AT5G57815	cytochrome c oxidase subunit 6b, putative similar to subunit 6b of cytochrome c oxidase [Arabidopsis thaliana] gi|6518353|dbj|BAA87883
247921_at	AT5G57660	12	4		NC	NC	MC_I	1742.4	1965.4	1853.9	P	P	0.000244	0.000244	2245.8	2598.1	2421.95	P	P	0.000244	0.000244	0.4	0.2	0.6	0.4	0.4	0.163299	I	NC	I	I	3	0.2	0.3	NC	NC	AT5G57660	zinc finger (B-box type) family protein contains Pfam domain, PF00643: B-box zinc finger
247937_at	AT5G57110	12	4		NC	NC	MC_I	1332.1	1271.8	1301.95	P	P	0.000732	0.000732	1984.9	1526	1755.45	P	P	0.000244	0.000732	0.5	0.3	0.5	0.3	0.4	0.11547	I	I	I	NC	3	0	0.1	NC	NC	AT5G57110	calcium-transporting ATPase 8, plasma membrane-type / Ca(2+)-ATPase isoform 8 (ACA8) identical to calcium-transporting ATPase 8, plasma membrane-type SP:Q9LF79 from [Arabidopsis thaliana]
247936_at	AT5G57030	12	4		NC	NC	MC_I	1862.6	2025.9	1944.25	P	P	0.000244	0.000244	2414.4	2307.4	2360.9	P	P	0.000244	0.000244	0.4	0.3	0.3	0.3	0.325	0.05	I	I	I	NC	3	0	-0.1	NC	NC	AT5G57030	lycopene epsilon cyclase identical to lycopene epsilon cyclase [GI:1399181]
247977_at	AT5G56850	11	4		NC	NC	MC_I	337.9	361.3	349.6	P	P	0.00415	0.023926	618.8	465.4	542.1	P	P	0.00293	0.001953	0.6	0.8	0.5	0.4	0.575	0.170783	I	I	NC	I	3	-0.2	-0.2	NC	NC	AT5G56850	expressed protein
247982_at	AT5G56760	12	4		NC	NC	MC_D	4084.3	4063.3	4073.8	P	P	0.000244	0.000244	2923.5	3226.4	3074.95	P	P	0.000244	0.000244	-0.5	-0.6	-0.2	-0.3	-0.4	0.182574	D	D	NC	D	3	0.1	0.2	NC	NC	AT5G56760	serine O-acetyltransferase (SAT-52) identical to GI:905391
247964_at	AT5G56600	12	4		NC	NC	MC_D	3869.1	3403.9	3636.5	P	P	0.000244	0.001221	2837.2	2588.3	2712.75	P	P	0.000732	0.000732	-0.3	-0.3	-0.3	-0.5	-0.35	0.1	D	NC	D	D	3	0.1	-0.1	NC	NC	AT5G56600	profilin 5 (PRO5) (PRF3) identical to SP|Q9FE63 Profilin 5 {Arabidopsis thaliana}
247999_at	AT5G56150	12	4		NC	NC	MC_D	3702.6	3970.8	3836.7	P	P	0.000244	0.000244	3340.5	3384.8	3362.65	P	P	0.000244	0.000244	-0.3	-0.4	-0.2	-0.3	-0.3	0.0816497	D	D	NC	MD	2	0	0.1	NC	NC	AT5G56150	ubiquitin-conjugating enzyme, putative strong similarity to ubiquitin-conjugating enzyme UBC2 [Mesembryanthemum crystallinum] GI:5762457, UBC4 [Pisum sativum] GI:456568; contains Pfam profile PF00179: Ubiquitin-conjugating enzyme
248037_at	AT5G55930;AT5G55940	12	4	D	NC		MC_D	1158.8	1687.6	1423.2	P	P	0.001953	0.001221	482.8	799.3	641.05	P	P	0.008057	0.005859	-0.9	-1.6	-0.5	-0.7	-0.925	0.478714	D	D	D	D	4	0.5	0.6	I	NC	AT5G55930;AT5G55940	[AT5G55930, oligopeptide transporter OPT family protein similar to SP|P40900 Sexual differentiation process protein isp4 {Schizosaccharomyces pombe}, oligopeptide transporter Opt1p [Candida albicans] GI:2367386; contains Pfam profile PF03169: OPT oligope
248062_at	AT5G55450	12	4	D		NC	MC_D	4413.3	4077.7	4245.5	P	P	0.000244	0.000732	3202	2665.8	2933.9	P	P	0.000244	0.000244	-0.5	-0.5	-0.7	-0.8	-0.625	0.15	D	D	D	D	4	0	-0.3	NC	D	AT5G55450	protease inhibitor/seed storage/lipid transfer protein (LTP) family protein contains Pfam protease inhibitor/seed storage/LTP family domain PF00234
248081_at	AT5G55390	12	4		NC	NC	MC_I	547.2	606.5	576.85	P	P	0.001953	0.001953	726.9	852.9	789.9	P	P	0.000732	0.001953	0.4	0.3	0.4	0.3	0.35	0.057735	I	NC	I	I	3	0.1	0.1	NC	NC	AT5G55390	hydroxyproline-rich glycoprotein family protein
248099_at	AT5G55300	12	4		NC	NC	MC_I	610.1	610.6	610.35	P	P	0.000244	0.000244	916.8	797.6	857.2	P	P	0.000244	0.000244	0.5	0.5	0.5	0.5	0.5	0	I	I	NC	I	3	-0.1	-0.1	NC	NC	AT5G55300	DNA topoisomerase I identical to Swiss-Prot:P30181 DNA topoisomerase I [Arabidopsis thaliana]
248106_at	AT5G55100	12	4		NC	NC	MC_I	363.7	315.4	339.55	P	P	0.000732	0.000732	521.4	426.2	473.8	P	P	0.000244	0.000244	0.6	0.8	0.5	0.4	0.575	0.170783	I	I	NC	I	3	-0.3	-0.5	NC	NC	AT5G55100	SWAP (Suppressor-of-White-APricot)/surp domain-containing protein contains Pfam domain PF01805: Surp module
248138_at	AT5G54960	12	4		NC	NC	MC_D	5294.4	6507.5	5900.95	P	P	0.000244	0.000244	4315.1	5280.4	4797.75	P	P	0.000244	0.000732	-0.4	-0.6	-0.1	-0.4	-0.375	0.206155	D	D	NC	D	3	0.2	0.3	NC	NC	AT5G54960	pyruvate decarboxylase, putative strong similarity to pyruvate decarboxylase 1 [Vitis vinifera] GI:10732644; contains InterPro entry IPR000399: Pyruvate decarboxylase
248144_at	AT5G54800	12	4		NC	NC	MC_D	2916.8	3376.6	3146.7	P	P	0.000244	0.000244	2461.4	1961.1	2211.25	P	P	0.000244	0.000244	-0.2	-0.5	-0.4	-0.8	-0.475	0.25	NC	D	D	D	1	0.3	-0.2	NC	NC	AT5G54800	glucose-6-phosphate/phosphate translocator, putative identical to glucose 6 phosphate/phosphate translocator [Arabidopsis thaliana] gi|7229675|gb|AAF42936
248150_at	AT5G54670	12	4		NC	NC	MC_I	366.5	389.2	377.85	P	P	0.030273	0.046143	568.4	541.7	555.05	P	P	0.010742	0.018555	0.5	0.6	0.4	0.4	0.475	0.0957427	I	I	MI	NC	2	0.1	-0.1	NC	NC	AT5G54670	kinesin-like protein C (KATC)
248177_at	AT5G54630	12	4		NC	NC	MC_I	463.4	334.2	398.8	P	P	0.005859	0.010742	810.9	704.4	757.65	P	P	0.000732	0.010742	0.6	0.9	0.5	0.9	0.725	0.206155	I	I	I	NC	3	-0.3	-0.1	NC	NC	AT5G54630	zinc finger protein-related contains Prosite:PS00028 Zinc finger, C2H2 type, domain
248169_at	AT5G54610	12	4	I	NC		MC_I	291.2	186.7	238.95	P	P	0.00293	0.023926	563	526.7	544.85	P	P	0.000732	0.000732	1.1	1.8	0.9	1.6	1.35	0.420317	I	I	I	I	4	-0.8	-0.3	D	NC	AT5G54610	ankyrin repeat family protein contains Pfam domain, PF00023: Ankyrin repeat
248162_at	AT5G54500	12	4		NC	NC	MC_D	8702.3	7809.9	8256.1	P	P	0.000244	0.000244	6666.4	6399.9	6533.15	P	P	0.000244	0.000244	-0.4	-0.4	-0.4	-0.4	-0.4	0	D	D	D	NC	3	0	0.1	NC	NC	AT5G54500	quinone reductase, putative similar to 1,4-benzoquinone reductase [Phanerochaete chrysosporium][GI:4454993]; contains flavodoxin domain PF00258
248200_at	AT5G54160	12	4	D	NC		MC_D	15179.1	18873.7	17026.4	P	P	0.000244	0.000244	10066.3	10141.9	10104.1	P	P	0.000244	0.000244	-0.6	-0.9	-0.6	-0.9	-0.75	0.173205	D	D	D	D	4	0.3	0.1	I	NC	AT5G54160	quercetin 3-O-methyltransferase 1 / flavonol 3-O-methyltransferase 1 / caffeic acid/5-hydroxyferulic acid O-methyltransferase (OMT1) identical to O-methyltransferase 1 [Arabidopsis thaliana][GI:2781394], SP|Q9FK25 Quercetin 3-O-methyltransferase 1 (EC 2.
248236_at	AT5G53870	11	4		NC	NC	MC_D	283.4	191.9	237.65	P	P	0.00415	0.00293	56.3	79.3	67.8	P	P	0.037598	0.030273	-1.4	-1.8	-0.9	-1.7	-1.45	0.404145	D	D	D	NC	3	0	0.5	NC	NC	AT5G53870	plastocyanin-like domain-containing protein contains similarity to SP|Q02917 Early nodulin 55-2 precursor {Glycine max}; PF02298: Plastocyanin-like domain
248235_at	AT5G53860	12	4		NC	NC	MC_I	1740.7	1684.9	1712.8	P	P	0.000244	0.000244	2470.3	2273.7	2372	P	P	0.000244	0.000244	0.6	0.5	0.4	0.3	0.45	0.129099	I	I	I	MI	3	0	-0.1	NC	NC	AT5G53860	expressed protein
248223_at	AT5G53620	12	4		NC	NC	MC_I	1059.3	1063.2	1061.25	P	P	0.000244	0.001953	1361.7	1172.7	1267.2	P	P	0.000244	0.000244	0.5	0.4	0.4	0.2	0.375	0.125831	I	I	I	NC	3	0.1	-0.3	NC	NC	AT5G53620	expressed protein
248217_at	AT5G53560	12	4		NC	NC	MC_D	18131.5	18028.8	18080.2	P	P	0.000244	0.000244	15705.6	15734.1	15719.9	P	P	0.000244	0.000244	-0.2	-0.3	-0.2	-0.3	-0.25	0.057735	D	NC	D	MD	2	0.1	0	NC	NC	AT5G53560	cytochrome b5 isoform 1 identical to SP|Q42342 Cytochrome b5 isoform 1 [Arabidopsis thaliana]
248224_at	AT5G53490	12	4		NC	NC	MC_I	3664.7	3137.9	3401.3	P	P	0.000244	0.000244	4218.8	4358.5	4288.65	P	P	0.000244	0.000244	0.3	0.4	0.2	0.4	0.325	0.0957427	I	I	NC	I	3	-0.2	-0.1	NC	NC	AT5G53490	thylakoid lumenal 17.4 kDa protein, chloroplast identical to SP:P81760 Thylakoid lumenal 17.4 kDa protein, chloroplast precursor (P17.4) {Arabidopsis thaliana}
248266_at	AT5G53440	12	4		NC	NC	MC_I	639	485	562	P	P	0.000244	0.000244	906.8	926	916.4	P	P	0.000244	0.000732	0.2	0.2	0.2	0.3	0.225	0.05	MI	MI	NC	I	2	0.1	0	NC	NC	AT5G53440	expressed protein
248271_at	AT5G53420	12	4		NC	NC	MC_D	1181.5	1303	1242.25	P	P	0.000244	0.000244	990.1	1011.5	1000.8	P	P	0.000244	0.000244	-0.4	-0.4	-0.3	-0.3	-0.35	0.057735	D	D	D	NC	3	-0.1	0.2	NC	NC	AT5G53420	expressed protein
248303_at	AT5G53170	12	4		NC	NC	MC_I	1661.5	1357.1	1509.3	P	P	0.000244	0.000244	2542.4	1878	2210.2	P	P	0.000244	0.000244	0.4	0.6	0.2	0.3	0.375	0.170783	I	I	NC	I	3	-0.1	-0.1	NC	NC	AT5G53170	FtsH protease, putative similar to ATP-dependent metalloprotease FtsH1 GI:3600100 from [Mus musculus]
248281_at	AT5G52980	12	4		NC	NC	MC_D	869.8	1064	966.9	P	P	0.001953	0.000732	681.6	804.7	743.15	P	P	0.001953	0.001953	-0.4	-0.5	-0.2	-0.5	-0.4	0.141421	D	D	NC	MD	2	0.3	0.1	NC	NC	AT5G52980	expressed protein
248287_at	AT5G52970	12	4		NC	NC	MC_I	2873.7	2272.9	2573.3	P	P	0.000244	0.000732	3990.2	3291	3640.6	P	P	0.000244	0.000732	0.4	0.5	0.4	0.4	0.425	0.05	I	I	NC	I	3	-0.1	-0.2	NC	NC	AT5G52970	thylakoid lumen 15.0 kDa protein SP:Q9LVV5; similar to unknown protein (pir |S77462)
248339_at	AT5G52520	12	4		NC	NC	MC_I	1633.6	1765.5	1699.55	P	P	0.000244	0.000244	2189.8	1971.4	2080.6	P	P	0.000244	0.000244	0.4	0.2	0.2	0.1	0.225	0.125831	I	I	I	NC	3	0.3	-0.2	NC	NC	AT5G52520	tRNA synthetase class II (G, H, P and S) family protein similar to SP|P07814 Bifunctional aminoacyl-tRNA synthetase [Includes: Glutamyl-tRNA synthetase (EC 6.1.1.17) (Glutamate--tRNA ligase); Prolyl-tRNA synthetase (EC 6.1.1.15) (Proline--tRNA ligase)] {
248394_at	AT5G52070	12	4		NC	NC	MC_I	690.2	511.7	600.95	P	P	0.000244	0.000244	973.4	893.3	933.35	P	P	0.000244	0.000244	0.5	0.8	0.3	0.7	0.575	0.221736	I	I	MI	NC	2	-0.3	-0.1	NC	NC	AT5G52070	agenet domain-containing protein contains Pfam PF05641: Agenet domain
248399_at	AT5G52010	12	4		NC	NC	MC_I	818.5	661.9	740.2	P	P	0.001953	0.008057	1029.4	972.4	1000.9	P	P	0.000244	0.000732	0.5	0.6	0.3	0.5	0.475	0.125831	I	I	MI	I	3	0	-0.1	NC	NC	AT5G52010	zinc finger (C2H2 type) family protein contains Pfam domain, PF00096: Zinc finger, C2H2 type
248427_at	AT5G51750	12	4		NC	NC	MC_I	1197	1631.3	1414.15	P	P	0.000244	0.000244	1948.8	1788.4	1868.6	P	P	0.000244	0.000244	0.6	0.5	0.5	0.3	0.475	0.125831	I	I	I	NC	3	0.1	-0.2	NC	NC	AT5G51750	subtilase family protein similar to subtilisin-like protease GI:3687307 from [Lycopersicon esculentum]
248502_at	AT5G50450	12	4		NC	NC	MC_I	506.8	545.1	525.95	P	P	0.01416	0.01416	618.3	809.2	713.75	P	P	0.00293	0.005859	0.5	0.2	0.6	0.6	0.475	0.189297	I	NC	I	I	3	0.1	0.1	NC	NC	AT5G50450	zinc finger (MYND type) family protein contains Pfam profile PF01753: MYND finger
248547_at	AT5G50280	12	4		NC	NC	MC_I	656.4	504.6	580.5	P	P	0.000732	0.000732	927.5	919.9	923.7	P	P	0.000732	0.000732	0.5	0.8	0.4	0.5	0.55	0.173205	I	I	NC	MI	2	-0.1	-0.1	NC	NC	AT5G50280	pentatricopeptide (PPR) repeat-containing protein contains Pfam profile PF01535: PPR repeat
248550_at	AT5G50210	12	4		NC	NC	MC_I	1099.6	1642.5	1371.05	P	P	0.000732	0.001953	1808.1	1685.2	1746.65	P	P	0.000244	0.000732	0.4	0.3	0.6	0.3	0.4	0.141421	I	I	I	NC	3	0.1	-0.1	NC	NC	AT5G50210	quinolinate synthetase A-related contains weak similarity to Swiss-Prot:P11458 quinolinate synthetase A [Escherichia coli]
248551_at	AT5G50200	12	4	D	NC		MC_D	1049.3	1772.6	1410.95	P	P	0.000244	0.000244	777	900.7	838.85	P	P	0.000244	0.000244	-0.6	-1	-0.3	-0.8	-0.675	0.298608	D	D	D	D	4	0.5	0.2	I	NC	AT5G50200	expressed protein similar to unknown protein (pir||T05562) isoform contains a non-consensus AT acceptor splice site at intron 1
248575_at	AT5G49840	12	4		NC	NC	MC_I	1133.4	995.8	1064.6	P	P	0.000244	0.000244	1751.9	1630.3	1691.1	P	P	0.000244	0.000244	0.3	0.4	0.4	0.4	0.375	0.05	NC	I	I	I	1	-0.1	0	NC	NC	AT5G49840	ATP-dependent Clp protease ATP-binding subunit ClpX, putative similar to CLP protease regulatory subunit CLPX GI:2674203 from [Arabidopsis thaliana]; non-consensus splice donor GC at exon 4; non-consensus splice donor AA at exon 7
248607_at	AT5G49480	12	4		NC	NC	MC_D	9960.4	9997.9	9979.15	P	P	0.000244	0.000244	8085.8	7510.9	7798.35	P	P	0.000244	0.000244	-0.3	-0.4	-0.3	-0.4	-0.35	0.057735	D	MD	D	NC	2	0	0	NC	NC	AT5G49480	sodium-inducible calcium-binding protein (ACP1) / sodium-responsive calcium-binding protein (ACP1) identical to NaCl-inducible Ca2+-binding protein GI:2352828 from [Arabidopsis thaliana]
248639_at	AT5G48930	12	4		NC	NC	MC_D	6254.1	7274.9	6764.5	P	P	0.000244	0.000244	5336.5	5178.1	5257.3	P	P	0.000244	0.000244	-0.3	-0.5	-0.2	-0.4	-0.35	0.129099	D	D	NC	D	3	0.2	0.1	NC	NC	AT5G48930	transferase family protein similar to anthranilate N-hydroxycinnamoyl/benzoyltransferase from Dianthus caryophyllus [GI:3288180, GI:2239091]; contains Pfam profile PF02458 transferase family
248682_at	AT5G48810	12	4		NC	NC	MC_D	8891	8722	8806.5	P	P	0.000244	0.000244	7039.4	6754.7	6897.05	P	P	0.000244	0.000244	-0.3	-0.3	-0.3	-0.4	-0.325	0.05	D	NC	D	MD	2	0	0	NC	NC	AT5G48810	cytochrome b5 identical to cytochrome b5 [Arabidopsis thaliana] GI:4240122; strong similarity to Cytochrome B5 SP:P49098 from [Nicotiana tabacum]
248729_at	AT5G48010	12	4		NC	NC	MC_D	1861.6	2301.2	2081.4	P	P	0.000244	0.000244	1232.9	1499.9	1366.4	P	P	0.000244	0.000244	-0.5	-0.6	-0.3	-0.5	-0.475	0.125831	D	D	NC	D	3	0.3	0.2	NC	NC	AT5G48010	pentacyclic triterpene synthase, putative similar to pentacyclic triterpene synthase [gi:6650207] [PMID: 11247608] Contains Pfam domain PF00432: Prenyltransferase and squalene oxidase repeat
248719_at	AT5G47910	12	4		NC	NC	MC_D	3882.7	4657.6	4270.15	P	P	0.000244	0.000244	3060.3	3140	3100.15	P	P	0.000244	0.000244	-0.2	-0.6	-0.2	-0.6	-0.4	0.23094	D	D	NC	D	3	0.5	0	NC	NC	AT5G47910	respiratory burst oxidase protein D (RbohD) / NADPH oxidase identical to respiratory burst oxidase protein D from Arabidopsis thaliana [gi:3242789]
248764_at	AT5G47640;AT5G47650	12	4		NC	NC	MC_I	749.4	614.5	681.95	P	P	0.000244	0.000732	855.2	1123	989.1	P	P	0.000244	0.000732	0.3	0.6	0.4	0.9	0.55	0.264575	NC	I	I	I	1	-0.3	0.3	NC	NC	AT5G47640;AT5G47650	[AT5G47640, CCAAT-box binding transcription factor subunit B (NF-YB) (HAP3 ) (AHAP3) family (Hap3b) similar to CAAT-box DNA binding protein subunit B (NF-YB) (SP:P25209) (GI:22380) [Zea mays]; contains Pfam PF00808 : Histone-like transcription factor (CB
248760_at	AT5G47570	12	4		NC	NC	MC_D	15563.8	18924.7	17244.2	P	P	0.000244	0.000244	13201.8	13265.4	13233.6	P	P	0.000244	0.000244	-0.3	-0.6	-0.3	-0.6	-0.45	0.173205	D	D	MD	D	3	0.3	0	NC	NC	AT5G47570	expressed protein
248794_at	AT5G47220	12	4		NC	NC	MC_D	1141.5	1443.6	1292.55	P	P	0.000244	0.000244	775.8	1024.1	899.95	P	P	0.000244	0.000244	-0.4	-0.6	-0.1	-0.5	-0.4	0.216025	D	D	NC	D	3	0.3	0.2	NC	NC	AT5G47220	ethylene-responsive element-binding factor 2 (ERF2) identical to SP|O80338 Ethylene responsive element binding factor 2 (AtERF2) [Arabidopsis thaliana]
248869_at	AT5G46840	12	4		NC	NC	MC_I	570.2	602.9	586.55	P	P	0.000244	0.001953	1018.4	870.3	944.35	P	P	0.000244	0.000732	0.6	0.9	0.6	0.7	0.7	0.141421	I	I	MI	I	3	-0.1	-0.2	NC	NC	AT5G46840	RNA recognition motif (RRM)-containing protein contains InterPro entry IPR000504: RNA-binding region RNP-1 (RNA recognition motif) (RRM)
248854_at	AT5G46580	12	4		NC	NC	MC_I	2034.7	1864.9	1949.8	P	P	0.000244	0.000244	3046.5	2736.1	2891.3	P	P	0.000244	0.000244	0.6	0.8	0.5	0.5	0.6	0.141421	I	I	MI	I	3	-0.1	-0.2	NC	NC	AT5G46580	pentatricopeptide (PPR) repeat-containing protein contains similarity to 67kD chloroplastic RNA-binding protein, P67.1 [Raphanus sativus] GI:9755886; contains Pfam profile PF01535: PPR repeat
248899_at	AT5G46390	12	4		NC	NC	MC_I	849.6	575.2	712.4	P	P	0.000244	0.000244	1232.9	1085.9	1159.4	P	P	0.000244	0.000244	0.6	0.5	0.5	0.4	0.5	0.0816497	I	I	NC	I	3	0.1	0	NC	NC	AT5G46390	peptidase S41 family protein similar to C-terminal peptidase of the D1 protein [Hordeum vulgare subsp vulgare] GI:1296805; contains Pfam profiles PF03572: Peptidase family S41B, PF00595: PDZ domain (Also known as DHR or GLGF)
248910_at	AT5G45820	10	4		NC	NC	MC_I	690.1	558.3	624.2	P	P	0.00293	0.023926	855.5	818.5	837	P	P	0.001221	0.008057	0.3	0.7	0.4	0.8	0.55	0.238048	I	I	NC	I	3	-0.4	-0.1	NC	NC	AT5G45820	CBL-interacting protein kinase 20 (CIPK20) identical to CBL-interacting protein kinase 20 [Arabidopsis thaliana] gi|14486384|gb|AAK61493
248963_at	AT5G45700	11	4	I		NC	MC_I	129.7	118.5	124.1	P	P	0.00293	0.00415	267.8	222.2	245	P	P	0.000244	0.000732	1.1	1.2	0.9	0.6	0.95	0.264575	I	I	I	I	4	0.1	-0.4	NC	D	AT5G45700	NLI interacting factor (NIF) family protein contains Pfam profile PF03031: NLI interacting factor
248961_at	AT5G45650	12	4		NC	NC	MC_D	1864.1	2298.7	2081.4	P	P	0.000244	0.000244	1278	1569.9	1423.95	P	P	0.000244	0.000244	-0.4	-0.8	-0.3	-0.5	-0.5	0.216025	D	D	NC	D	3	0.2	0.2	NC	NC	AT5G45650	subtilase family protein contains Pfam domain, PF00082: Subtilase family; contains Pfam domain, PF02225: protease associated (PA) domain
248968_at	AT5G45280	12	4		NC	NC	MC_D	2600.3	2879.5	2739.9	P	P	0.000244	0.000244	2157.8	1903.4	2030.6	P	P	0.000244	0.000244	-0.2	-0.4	-0.4	-0.5	-0.375	0.125831	NC	D	D	D	1	0.2	-0.2	NC	NC	AT5G45280	pectinacetylesterase, putative similar to pectinacetylesterase precursor GI:1431629 from [Vigna radiata]
248975_at	AT5G45040	12	4	I	NC		MC_I	1795	1478.4	1636.7	P	P	0.010742	0.037598	2689.7	2758.3	2724	P	P	0.001953	0.001953	0.5	0.9	0.6	1.1	0.775	0.275379	I	I	I	I	4	-0.5	0.1	D	NC	AT5G45040	cytochrome c6 (ATC6) identical to c6 type cytochrome [Arabidopsis thaliana] gi|19571824|emb|CAD27418
254521_at	AT5G44820	12	4		NC	NC	MC_D	433	292.5	362.75	P	P	0.000244	0.001953	227.2	165.5	196.35	P	P	0.001221	0.005859	-0.9	-1	-1.4	-1.3	-1.15	0.238048	D	NC	D	D	3	-0.3	-0.6	NC	NC	AT5G44820	expressed protein similar to unknown protein (pir||T04881)
249052_at	AT5G44420	12	4	D		NC	MC_D	8677.4	9410.2	9043.8	P	P	0.000244	0.000244	2755.9	3278.9	3017.4	P	P	0.000244	0.000244	-1.6	-1.8	-1.2	-1.5	-1.525	0.25	D	D	D	D	4	0.2	0.4	NC	I	AT5G44420	plant defensin protein, putative (PDF1.2a) plant defensin protein family member, personal communication, Bart Thomma (Bart.Thomma@agr.kuleuven.ac.be); similar to antifungal protein 1 preprotein [Raphanus sativus] gi|609322|gb|AAA69541
249073_at	AT5G44020	12	4		NC	NC	MC_D	7930	9152.8	8541.4	P	P	0.000244	0.000244	6991.1	6088.6	6539.85	P	P	0.000244	0.000244	-0.2	-0.2	-0.4	-0.4	-0.3	0.11547	D	NC	D	D	3	0	-0.2	NC	NC	AT5G44020	acid phosphatase class B family protein similar to SP|P15490 STEM 28 kDa glycoprotein precursor (Vegetative storage protein A) {Glycine max}, acid phosphatase [Glycine max] GI:3341443; contains Pfam profile PF03767: HAD superfamily (subfamily IIIB) phosp
249077_at	AT5G43940	12	4		NC	NC	MC_D	16424.8	19011.1	17718	P	P	0.000244	0.000244	13904.9	14616.3	14260.6	P	P	0.000244	0.000244	-0.2	-0.5	-0.1	-0.5	-0.325	0.206155	D	D	NC	D	3	0.3	0.1	NC	NC	AT5G43940	alcohol dehydrogenase class III / glutathione-dependent formaldehyde dehydrogenase / GSH-FDH (ADHIII) identical to gi:1143388
249112_at	AT5G43780	12	4	D	NC		MC_D	4438.8	3319.4	3879.1	P	P	0.000244	0.000244	1493.3	1673.4	1583.35	P	P	0.000732	0.000732	-1.4	-1.1	-1.2	-1	-1.175	0.170783	D	D	D	D	4	-0.3	0.2	MD	NC	AT5G43780	sulfate adenylyltransferase 4 / ATP-sulfurylase 4 (APS4) identical to ATP sulfurylase precursor (APS4) [Arabidopsis thaliana] GI:4633131
249136_at	AT5G43180	12	4		NC	NC	MC_D	751.4	509.5	630.45	P	P	0.000244	0.000244	474	291.3	382.65	P	P	0.000244	0.005859	-0.5	-0.4	-0.8	-0.5	-0.55	0.173205	D	NC	D	D	3	-0.4	0	NC	NC	AT5G43180	expressed protein contains Pfam profile PF04654: Protein of unknown function, DUF599
249133_at	AT5G43130	12	4		NC	NC	MC_I	800.8	893	846.9	P	P	0.000244	0.000244	1195.4	1296.7	1246.05	P	P	0.000244	0.000244	0.4	0.3	0.5	0.4	0.4	0.0816497	MI	NC	I	I	1	0.2	0	NC	NC	AT5G43130	transcription initiation factor IID (TFIID) component TAF4 family protein weak similarity to SP|O00268 Transcription initiation factor TFIID 135 kDa subunit {Homo sapiens}; contains Pfam profile PF05236: Transcription initiation factor TFIID component TA
249129_at	AT5G43080	12	4		NC	NC	MC_I	361.6	359.3	360.45	P	P	0.000244	0.000732	595.9	621.6	608.75	P	P	0.000244	0.000244	0.6	0.9	0.8	0.9	0.8	0.141421	NC	I	I	I	1	0.1	0.2	NC	NC	AT5G43080	cyclin, putative similar to A-type cyclins from [Nicotiana tabacum] GI:1064931, [Catharanthus roseus] GI:2190259; contains Pfam profiles PF00134: Cyclin, N-terminal domain, PF02984: Cyclin, C-terminal domain
249208_at	AT5G42650	12	4	D		NC	MC_D	2444.5	2413.6	2429.05	P	P	0.000244	0.000244	987.8	1307.3	1147.55	P	P	0.000244	0.000244	-1.1	-1.1	-0.7	-0.8	-0.925	0.206155	D	D	D	D	4	0	0.5	NC	I	AT5G42650	allene oxide synthase (AOS) / hydroperoxide dehydrase / cytochrome P450 74A (CYP74A) identical to Allene oxide synthase, chloroplast precursor (Hydroperoxide dehydrase) (Cytochrome P450 74A) (SP:Q96242) {Arabidopsis thaliana}
249218_at	AT5G42390	12	4		NC	NC	MC_I	1035.2	1058.5	1046.85	P	P	0.000244	0.000244	1451.9	1551.9	1501.9	P	P	0.000244	0.000244	0.5	0.4	0.4	0.4	0.425	0.05	I	I	MI	I	3	0	0	NC	NC	AT5G42390	metalloendopeptidase identical to chloroplast processing enzyme metalloendopeptidase [Arabidopsis thaliana] gi|2827039|gb|AAC39482
249247_at	AT5G42310	12	4		NC	NC	MC_I	975.4	929.8	952.6	P	P	0.000244	0.000244	1395.1	1164.2	1279.65	P	P	0.000244	0.000244	0.4	0.5	0.3	0.4	0.4	0.0816497	I	I	NC	I	3	-0.1	0	NC	NC	AT5G42310	pentatricopeptide (PPR) repeat-containing protein contains Pfam profile PF01535: PPR repeat
249217_at	AT5G42300	12	4		NC	NC	MC_D	9335.4	9208.2	9271.8	P	P	0.000244	0.000244	7748.6	6604.9	7176.75	P	P	0.000244	0.000244	-0.3	-0.2	-0.4	-0.3	-0.3	0.0816497	D	NC	D	D	3	-0.1	-0.2	NC	NC	AT5G42300	ubiquitin family protein contains INTERPRO:IPR000626 ubiquitin domain
249216_at	AT5G42240	12	4		NC	NC	MC_I	966.3	707.3	836.8	P	P	0.000244	0.000244	1123	1226.9	1174.95	P	P	0.000244	0.000244	0.4	0.6	0.3	0.5	0.45	0.129099	I	I	I	MI	3	0	-0.1	NC	NC	AT5G42240	serine carboxypeptidase S10 family protein similar to Serine carboxypeptidase II-3 precursor (SP:P52711) (CP-MII.3. [Hordeum vulgare]
249238_at	AT5G41970	12	4		NC	NC	MC_I	1736.2	1917.4	1826.8	P	P	0.000244	0.000244	2425.8	2007.5	2216.65	P	P	0.000244	0.000244	0.5	0.3	0.4	0	0.3	0.216025	I	I	I	NC	3	0.2	-0.2	NC	NC	AT5G41970	expressed protein contains Pfam profile PF03690: Uncharacterised protein family (UPF0160)
249266_at	AT5G41670	12	4		NC	NC	MC_D	4585.8	5366.6	4976.2	P	P	0.000244	0.000244	3803.8	3509.4	3656.6	P	P	0.000244	0.000244	-0.2	-0.5	-0.2	-0.5	-0.35	0.173205	D	D	NC	D	3	0.3	0	NC	NC	AT5G41670	6-phosphogluconate dehydrogenase family protein contains Pfam profiles: PF00393 6-phosphogluconate dehydrogenase C-terminal domain, PF03446 NAD binding domain of 6-phosphogluconate
249337_at	AT5G41080	12	4		NC	NC	MC_I	160.8	292.7	226.75	P	P	0.000244	0.005859	425.6	276.3	350.95	P	P	0.000244	0.001953	1.5	0.7	1	0.6	0.95	0.404145	I	I	NC	I	3	0.2	-0.2	NC	NC	AT5G41080	glycerophosphoryl diester phosphodiesterase family protein weak similarity to SP|P37965 Glycerophosphoryl diester phosphodiesterase (EC 3.1.4.46) {Bacillus subtilis}; contains Pfam profile PF03009: Glycerophosphoryl diester phosphodiesterase family
249325_at	AT5G40850	12	4		NC	NC	MC_I	4429.6	4555.5	4492.55	P	P	0.000244	0.000244	5716.2	5633	5674.6	P	P	0.000244	0.000244	0.3	0.3	0.3	0.3	0.3	0	I	I	I	NC	3	0.1	0.1	NC	NC	AT5G40850	urophorphyrin III methylase (UPM1) identical to urophorphyrin III methylase (GI:1146165) [Arabidopsis thaliana]; similar to s-adenosyl-L-methionine-dependent uroporphyrinogen III methyltransferase (GI:1490606) [Arabidopsis thaliana]; similar to Diphthine
249346_at	AT5G40780	12	4		NC	NC	MC_D	3807.8	4090.6	3949.2	P	P	0.000244	0.000244	3222.1	2718.7	2970.4	P	P	0.000244	0.000244	-0.2	-0.4	-0.3	-0.4	-0.325	0.0957427	NC	D	D	D	1	0.2	-0.1	NC	NC	AT5G40780	lysine and histidine specific transporter, putative strong similarity to lysine and histidine specific transporter GI:2576361 from [Arabidopsis thaliana]; contains Pfam profile PF01490: Transmembrane amino acid transporter protein
249379_at	AT5G40460	12	4		NC	NC	MC_I	179.1	159.7	169.4	P	P	0.001221	0.001953	277.1	339.3	308.2	P	P	0.000732	0.000244	0.7	0.6	1.1	0.9	0.825	0.221736	NC	I	I	I	1	0.2	0.2	NC	NC	AT5G40460	expressed protein
249434_at	AT5G39960	9	4		NC	NC	MC_I	255.4	206.1	230.75	P	P	0.046143	0.030273	318.9	317.2	318.05	P	P	0.010742	0.008057	0.4	0.4	0.6	0.6	0.5	0.11547	I	NC	I	MI	2	0	0.1	NC	NC	AT5G39960	GTP-binding family protein contains Pfam domain, PF01926: GTPase of unknown function
249421_at	AT5G39830	12	4		NC	NC	MC_I	1823.9	1639.1	1731.5	P	P	0.000244	0.000244	2266.1	2222.6	2244.35	P	P	0.000244	0.000244	0.4	0.5	0.3	0.4	0.4	0.0816497	I	I	NC	I	3	-0.1	-0.1	NC	NC	AT5G39830	DegP protease, putative contains similarity to DegP protease precursor GI:2565436 from [Arabidopsis thaliana]
249459_at	AT5G39580	12	4	D	NC		MC_D	897.3	1360	1128.65	P	P	0.000244	0.000244	261.2	325.7	293.45	P	P	0.001221	0.001221	-1.9	-2.4	-1.7	-2	-2	0.294392	D	D	D	D	4	0.6	0.1	I	NC	AT5G39580	peroxidase, putative identical to peroxidase ATP24a [Arabidopsis thaliana] gi|1890313|emb|CAA72484
249454_at	AT5G39520	12	4	D		NC	MC_D	1768.4	1737	1752.7	P	P	0.000244	0.000244	326.7	802.5	564.6	P	P	0.005859	0.000732	-1.8	-1.9	-1.1	-1.1	-1.475	0.434933	D	D	D	D	4	-0.1	1	NC	I	AT5G39520	expressed protein predicted protein, Synechocystis sp., PIR:S77152
249490_s_at	AT5G39120;AT5G39150;AT5G39180;AT5G39110	12	4	D		NC	MC_D	632.4	479	555.7	P	P	0.000244	0.000732	153.8	224	188.9	P	P	0.023926	0.001221	-2.2	-1.6	-1.6	-1.4	-1.7	0.34641	D	D	D	D	4	-0.4	0.7	NC	I	AT5G39120;AT5G39150;AT5G39180;AT5G39110	[AT5G39120, germin-like protein, putative similar to germin -like protein GLP6, Arabidopsis thaliana, EMBL:ATU75194 [SP|P92997]];[AT5G39150, germin-like protein, putative similar to germin -like protein GLP6, Arabidopsis thaliana, EMBL:ATU75194 [SP|P929
249493_at	AT5G39080	12	4		NC	NC	MC_I	663.7	708.7	686.2	P	P	0.001953	0.00415	819.7	779.1	799.4	P	P	0.001953	0.001953	0.3	0.3	0.4	0.3	0.325	0.05	I	I	I	NC	3	0	0.1	NC	NC	AT5G39080	transferase family protein similar to anthocyanin 5-aromatic acyltransferase from Gentiana triflora GI:4185599, malonyl CoA:anthocyanin 5-O-glucoside-6'''-O-malonyltransferase from Perilla frutescens GI:17980232, Salvia splendens GI:17980234; contains Pf
249537_at	AT5G38830	12	4		NC	NC	MC_I	1410.1	1595.9	1503	P	P	0.000244	0.000244	1667.1	1903.2	1785.15	P	P	0.000244	0.000244	0.4	0.3	0.4	0.3	0.35	0.057735	I	I	I	NC	3	0	0	NC	NC	AT5G38830	tRNA synthetase class I (C) family protein similar to SP|Q06752 Cysteinyl-tRNA synthetase (EC 6.1.1.16) (Cysteine--tRNA ligase) (CysRS) {Bacillus subtilis}; contains Pfam profile PF01406: tRNA synthetases class I (C)
249580_at	AT5G37740	12	4		NC	NC	MC_D	4139.4	3711.9	3925.65	P	P	0.000244	0.000244	3168.8	3118.8	3143.8	P	P	0.000244	0.000244	-0.4	-0.3	-0.4	-0.3	-0.35	0.057735	D	NC	D	MD	2	-0.1	0	NC	NC	AT5G37740	C2 domain-containing protein similar to zinc finger and C2 domain protein GI:9957238 from [Arabidopsis thaliana]
249641_at	AT5G36950	12	4		NC	NC	MC_I	315.4	311.8	313.6	P	P	0.01416	0.023926	480.5	426.1	453.3	P	P	0.00415	0.010742	0.3	0.5	0.3	0.4	0.375	0.0957427	I	I	NC	I	3	-0.2	-0.1	NC	NC	AT5G36950	DegP protease, putative contains similarity to DegP2 protease GI:13172275 from [Arabidopsis thaliana]
246613_at	AT5G35360	12	4		NC	NC	MC_I	4571.8	4956.2	4764	P	P	0.000244	0.000732	6222.1	5700.3	5961.2	P	P	0.000244	0.000244	0.5	0.4	0.3	0.3	0.375	0.0957427	I	I	MI	NC	2	0	-0.2	NC	NC	AT5G35360	acetyl-CoA carboxylase, biotin carboxylase subunit (CAC2) identical to acetyl-CoA carboxylase, biotin carboxylase subunit (CAC2) [Arabidopsis thaliana] GI:1905876
246652_at	AT5G35190	12	4		NC	NC	MC_D	423.7	497.4	460.55	P	P	0.000244	0.000244	298.8	347.2	323	P	P	0.000244	0.000732	-0.6	-0.4	-0.8	-0.7	-0.625	0.170783	D	NC	D	D	3	-0.1	-0.5	NC	NC	AT5G35190	proline-rich extensin-like family protein contains proline-rich extensin domains, INTERPRO:IPR002965
246651_at	AT5G35170	12	4	I	NC		MC_I	1471.5	1207.9	1339.7	P	P	0.000244	0.000244	2326.1	2047	2186.55	P	P	0.000244	0.000244	0.6	0.8	0.5	0.8	0.675	0.15	I	I	I	I	4	-0.3	0	D	NC	AT5G35170	adenylate kinase family protein contains Pfam profile: PF00406 adenylate kinase
246173_s_at	AT5G28370;AT3G61520;AT5G28460	12	4		NC	NC	MC_I	1044.9	893.9	969.4	P	P	0.000244	0.000244	1321.3	1168.1	1244.7	P	P	0.000244	0.000244	0.5	0.6	0.4	0.4	0.475	0.0957427	I	I	NC	I	3	0	-0.3	NC	NC	AT5G28370;AT3G61520;AT5G28460	[AT5G28370, pentatricopeptide (PPR) repeat-containing protein contains Pfam profile PF01535: PPR repeat];[AT3G61520, pentatricopeptide (PPR) repeat-containing protein contains Pfam profile PF01535: PPR repeat];[AT5G28460, pentatricopeptide (PPR) repeat
246700_at	AT5G28030	12	4		NC	NC	MC_I	624.1	523.5	573.8	P	P	0.000244	0.000732	903.9	640.4	772.15	P	P	0.000732	0.000732	0.7	0.6	0.3	0.3	0.475	0.206155	I	I	NC	I	3	0	-0.3	NC	NC	AT5G28030	cysteine synthase, putative / O-acetylserine (thiol)-lyase, putative / O-acetylserine sulfhydrylase, putative similar to O-acetylserine(thiol) lyase [Brassica juncea] GI:2245144; contains Pfam profile PF00291: Pyridoxal-phosphate dependent enzyme
246744_at	AT5G27760	12	4		NC	NC	MC_D	8425.5	8592.8	8509.15	P	P	0.000244	0.000244	5866.6	7173.7	6520.15	P	P	0.000244	0.000244	-0.5	-0.5	-0.2	-0.2	-0.35	0.173205	D	D	D	NC	3	0	0.2	NC	NC	AT5G27760	hypoxia-responsive family protein contains Pfam profile: PF04588 hypoxia induced protein conserved region
246781_at	AT5G27350	12	4		NC	NC	MC_I	2695.5	2257.3	2476.4	P	P	0.000244	0.000244	3289.7	3141.1	3215.4	P	P	0.000244	0.000244	0.3	0.4	0.3	0.4	0.35	0.057735	I	I	NC	I	3	0	0	NC	NC	AT5G27350	sugar-porter family protein 1 (SFP1) identical to sugar-porter family protein 1 [Arabidopsis thaliana] GI:14585699
246765_at	AT5G27330	12	4		NC	NC	MC_I	180.3	277.4	228.85	P	P	0.00293	0.00293	301.3	293.5	297.4	P	P	0.00415	0.001221	0.5	0.4	0.5	0.3	0.425	0.0957427	I	MI	I	NC	2	0.2	-0.1	NC	NC	AT5G27330	expressed protein
246849_at	AT5G26850	12	4		NC	NC	MC_I	959.1	1244.2	1101.65	P	P	0.000244	0.000244	1608.5	1621.4	1614.95	P	P	0.000244	0.000244	0.7	0.5	0.6	0.4	0.55	0.129099	I	I	I	MI	3	0.3	-0.1	NC	NC	AT5G26850	expressed protein
247059_at	AT5G26310;AT5G66690	12	4		NC	NC	MC_D	2354	2711.8	2532.9	P	P	0.000244	0.000244	1696	1844.6	1770.3	P	P	0.000244	0.000244	-0.6	-0.4	-0.5	-0.3	-0.45	0.129099	D	D	D	NC	3	0	0.1	NC	NC	AT5G26310;AT5G66690	[AT5G26310, UDP-glucoronosyl/UDP-glucosyl transferase family protein contains Pfam profile: PF00201 UDP-glucoronosyl and UDP-glucosyl transferase];[AT5G66690, UDP-glucoronosyl/UDP-glucosyl transferase family protein contains Pfam profile: PF00201 UDP-gl
246897_at	AT5G25560	12	4		NC	NC	MC_I	759.3	706.9	733.1	P	P	0.000244	0.000244	1113	875.3	994.15	P	P	0.000244	0.000244	0.5	0.6	0.3	0.5	0.475	0.125831	I	I	NC	I	3	-0.1	-0.1	NC	NC	AT5G25560	zinc finger (C3HC4-type RING finger) family protein contains Pfam domain PF00097: Zinc finger, C3HC4 type (RING finger)
246919_at	AT5G25460	12	4		NC	NC	MC_I	8664.1	8510.7	8587.4	P	P	0.000244	0.000244	12171.9	10058.9	11115.4	P	P	0.000244	0.000244	0.3	0.4	0.1	0.2	0.25	0.129099	I	I	NC	I	3	-0.1	-0.2	NC	NC	AT5G25460	expressed protein contains Pfam profile PF04862: Protein of unknown function, DUF642
246930_at	AT5G25220	12	4		NC	NC	MC_I	491.9	326.3	409.1	P	P	0.018555	0.01416	573.1	384.5	478.8	P	P	0.000244	0.000732	0.2	0.6	0.3	0.5	0.4	0.182574	NC	I	I	MI	1	-0.6	-0.3	NC	NC	AT5G25220	homeobox protein knotted-1 like 3 (KNAT3) identical to homeobox protein knotted-1 like 3 (KNAT3) SP:P48000 from [Arabidopsis thaliana]
246975_at	AT5G24890	12	4		NC	NC	MC_I	1278.9	828.1	1053.5	P	P	0.000732	0.000732	1816.5	1782	1799.25	P	P	0.000244	0.000244	0.4	0.5	0.4	0.6	0.475	0.0957427	I	I	NC	I	3	-0.3	0	NC	NC	AT5G24890	expressed protein weak similarity to MTD1 [Medicago truncatula] GI:9294810
249774_at	AT5G24150	12	4		NC	NC	MC_I	916.8	715.2	816	P	P	0.00415	0.030273	1172	1372.8	1272.4	P	P	0.00293	0.005859	0.4	0.6	0.6	0.7	0.575	0.125831	MI	I	I	I	1	-0.3	0.1	NC	NC	AT5G24150	squalene monooxygenase 1,1 / squalene epoxidase 1,1 (SQP1,1) identical to SP|O65404
249806_at	AT5G23850	12	4		NC	NC	MC_D	488	610	549	P	P	0.000244	0.001221	367.6	429.4	398.5	P	P	0.00293	0.00415	-0.5	-0.8	-0.2	-0.6	-0.525	0.25	D	D	NC	D	3	0.3	0.4	NC	NC	AT5G23850	expressed protein
249845_at	AT5G23610	12	4		NC	NC	MC_I	1124.3	1164.3	1144.3	P	P	0.000244	0.000244	1474.8	1315.8	1395.3	P	P	0.000244	0.000244	0.6	0.3	0.4	0.2	0.375	0.170783	I	I	I	NC	3	0.2	0	NC	NC	AT5G23610	expressed protein
249836_at	AT5G23420	12	4	I	NC		MC_I	358.5	180.5	269.5	P	P	0.000732	0.000732	571.4	489.5	530.45	P	P	0.000244	0.000732	0.6	1.4	0.6	1.2	0.95	0.412311	I	I	I	I	4	-0.6	-0.1	D	NC	AT5G23420	high mobility group (HMG1/2) family protein similar to high mobility group protein 2 HMG2 [Ipomoea nil] GI:1052956; contains Pfam profile PF00505: HMG (high mobility group) box
249826_at	AT5G23310	12	4		NC	NC	MC_I	1733.3	1826.2	1779.75	P	P	0.000244	0.000244	2679.3	2554.4	2616.85	P	P	0.000244	0.000244	0.6	0.4	0.5	0.3	0.45	0.129099	I	I	I	NC	3	0.2	-0.1	NC	NC	AT5G23310	superoxide dismutase [Fe] / iron superoxide dismutase 3 (FSD3) identical to iron superoxide dismutase 3 [Arabidopsis thaliana] gi|3273757|gb|AAC24834
249874_at	AT5G23070	12	4		NC	NC	MC_I	817.3	849.9	833.6	P	P	0.000244	0.000244	1177.5	1090.6	1134.05	P	P	0.000244	0.000244	0.5	0.6	0.5	0.4	0.5	0.0816497	I	I	I	NC	3	0.1	-0.1	NC	NC	AT5G23070	thymidine kinase, putative similar to thymidine kinase [Oryza sativa] SWISS-PROT:O81263
249860_at	AT5G22860	11	4		NC	NC	MC_D	187.7	312.8	250.25	P	P	0.000732	0.001221	179.5	184.5	182	P	P	0.00293	0.01416	-0.4	-0.8	-1.1	-0.7	-0.75	0.288675	NC	D	D	D	1	0.7	0.1	NC	NC	AT5G22860	serine carboxypeptidase S28 family protein contains Pfam profile: PF05577 serine carboxypeptidase S28
246031_at	AT5G21160	12	4		NC	NC	MC_I	1172.9	1166.2	1169.55	P	P	0.000244	0.000244	1515	1530.3	1522.65	P	P	0.000244	0.000244	0.3	0.2	0.5	0.4	0.35	0.129099	I	NC	I	I	3	0.1	0.3	NC	NC	AT5G21160	La domain-containing protein / proline-rich family protein contains proline-rich extensin domains, INTERPRO:IPR002965, PF05383: La domain
245999_at	AT5G20650	12	4		NC	NC	MC_D	9385.2	9471.6	9428.4	P	P	0.000244	0.000244	7110.7	8029.7	7570.2	P	P	0.000244	0.000244	-0.4	-0.6	-0.2	-0.3	-0.375	0.170783	D	D	NC	D	3	0.1	0.2	NC	NC	AT5G20650	copper transporter family protein similar to SP|Q39065 Copper transporter 1 (COPT1) {Arabidopsis thaliana}; contains Pfam profile PF04145: Ctr copper transporter family
246075_at	AT5G20410	9	4		NC	NC	MC_I	130	148.4	139.2	P	P	0.018555	0.023926	229.1	262	245.55	P	P	0.001953	0.001953	0.4	0.7	0.9	0.8	0.7	0.216025	I	NC	I	I	3	0.3	0.3	NC	NC	AT5G20410	1,2-diacylglycerol 3-beta-galactosyltransferase, putative / monogalactosyldiacylglycerol synthase, putative / MGDG synthase, putative identical to monogalactosyldiacylglycerol synthase [gi:3367638] from Arabidopsis thaliana, similar to MGDG synthase type
246149_at	AT5G19890	12	4	D		NC	MC_D	2382.7	2189.2	2285.95	P	P	0.000244	0.000244	838.4	1262.6	1050.5	P	P	0.000244	0.000244	-1.4	-1.3	-1	-0.9	-1.15	0.238048	D	D	D	D	4	-0.1	0.5	NC	I	AT5G19890	peroxidase, putative identical to peroxidase [Arabidopsis thaliana] gi|1403134|emb|CAA67092
245951_at	AT5G19550	12	4	D	NC		MC_D	7294.3	9852.6	8573.45	P	P	0.000244	0.000244	5772.9	6086.4	5929.65	P	P	0.000244	0.000244	-0.4	-0.8	-0.2	-0.7	-0.525	0.275379	D	D	D	D	4	0.4	0.2	I	NC	AT5G19550	aspartate aminotransferase, cytoplasmic isozyme 1 / transaminase A (ASP2) identical to SP|P46645 Aspartate aminotransferase, cytoplasmic isozyme 1 (EC 2.6.1.1) (Transaminase A) {Arabidopsis thaliana}
249957_at	AT5G18900	12	4		NC	NC	MC_D	1900.3	2439.4	2169.85	P	P	0.000244	0.000244	1649.8	1571.9	1610.85	P	P	0.000244	0.000244	-0.3	-0.5	-0.3	-0.6	-0.425	0.15	D	D	NC	D	3	0.3	-0.1	NC	NC	AT5G18900	oxidoreductase, 2OG-Fe(II) oxygenase family protein similar to prolyl 4-hydroxylase, alpha subunit, from Rattus norvegicus [GI:474940], Mus musculus [SP|Q60715], Homo sapiens [GI:18073925]; contains PF03171 2OG-Fe(II) oxygenase superfamily domain
249955_at	AT5G18840	12	4	D	NC		MC_D	1775.4	2617	2196.2	P	P	0.000244	0.000244	947.9	914.1	931	P	P	0.000244	0.000244	-1	-1.5	-1.1	-1.6	-1.3	0.294392	D	D	D	D	4	0.6	-0.1	I	NC	AT5G18840	sugar transporter, putative similar to ERD6 protein {Arabidopsis thaliana} GI:3123712, sugar-porter family protein 1 [Arabidopsis thaliana] GI:14585699; contains Pfam profile PF00083: major facilitator superfamily protein
260118_s_at	AT5G18700;AT1G33940	12	4		NC	NC	MC_I	444.6	490.7	467.65	P	P	0.001953	0.000732	769.3	578.9	674.1	P	P	0.000244	0.000244	0.6	0.5	0.5	0.5	0.525	0.05	I	MI	I	NC	2	0.1	-0.4	NC	NC	AT5G18700;AT1G33940	[AT5G18700, protein kinase-related contains protein kinase domain, INTERPRO:IPR000719];[AT1G33940, hypothetical protein]
249983_at	AT5G18470	12	4		NC	NC	MC_D	889.9	939.4	914.65	P	P	0.000244	0.000244	710.7	697.9	704.3	P	P	0.000244	0.000244	-0.3	-0.5	-0.3	-0.6	-0.425	0.15	NC	D	D	D	1	0.2	-0.1	NC	NC	AT5G18470	curculin-like (mannose-binding) lectin family protein contains Pfam profile: PF01453 lectin (probable mannose binding)
250017_at	AT5G18140	12	4		NC	NC	MC_I	1030.7	1018.9	1024.8	P	P	0.001221	0.001221	1209.7	1463.7	1336.7	P	P	0.000244	0.000732	0.3	0.4	0.5	0.6	0.45	0.129099	NC	I	I	I	1	-0.1	0.2	NC	NC	AT5G18140	DNAJ heat shock N-terminal domain-containing protein similar to DnaJ protein Tid-1 [Homo sapiens] GI:17066575; contains Pfam profile PF00226 DnaJ domain
250054_at	AT5G17860	12	4	D	NC		MC_D	3212.9	3567.9	3390.4	P	P	0.000244	0.000244	1768	2083.1	1925.55	P	P	0.001221	0.000732	-0.9	-1.2	-0.6	-1	-0.925	0.25	D	D	D	D	4	0.3	0.1	I	NC	AT5G17860	cation exchanger, putative (CAX7) contains similarity to SWISS-PROT:Q9HC58 NKX3_HUMAN Sodium/potassium/calcium exchanger 3 precursor {Homo sapiens}; Ca2+:Cation Antiporter (CaCA) Family member PMID:11500563
246427_at	AT5G17400	12	4		NC	NC	MC_I	681.5	497.2	589.35	P	P	0.000732	0.001953	728	858.6	793.3	P	P	0.000244	0.001221	0.4	0.6	0.2	0.5	0.425	0.170783	I	I	NC	I	3	-0.2	0	NC	NC	AT5G17400	ADP, ATP carrier protein, mitochondrial, putative / ADP/ATP translocase, putative / adenine nucleotide translocator, putative similar to SWISS-PROT:Q09188 ADP,ATP carrier protein (ADP/ATP translocase) [Schizosaccharomyces pombe]; contains Pfam profile: P
250083_at	AT5G17220	11	4		NC	NC	MC_I	467.9	377.5	422.7	P	P	0.00293	0.000732	472.4	488.2	480.3	P	P	0.000732	0.000732	0.3	0.4	0.4	0.5	0.4	0.0816497	NC	I	I	I	1	-0.2	0.3	NC	NC	AT5G17220	glutathione S-transferase, putative
246415_at	AT5G17160	12	4		NC	NC	MC_I	526.9	645.7	586.3	P	P	0.023926	0.023926	1048.4	814.7	931.55	P	P	0.001953	0.008057	0.8	0.5	0.4	0.4	0.525	0.189297	I	I	MI	NC	2	0.2	-0.4	NC	NC	AT5G17160	expressed protein
250080_at	AT5G16620	12	4		NC	NC	MC_I	1560.9	2026.4	1793.65	P	P	0.000244	0.000244	2594	2184.2	2389.1	P	P	0.000244	0.000244	0.6	0.3	0.4	0.2	0.375	0.170783	I	I	I	NC	3	0.2	-0.1	NC	NC	AT5G16620	hydroxyproline-rich glycoprotein family protein contains proline rich extensin domains, INTERPRO:IPR002965
250104_at	AT5G16610	12	4		NC	NC	MC_I	245.7	278.2	261.95	P	P	0.000732	0.008057	437.2	324.6	380.9	P	P	0.001953	0.001221	0.7	0.5	0.4	0.5	0.525	0.125831	I	I	NC	I	3	0.2	-0.2	NC	NC	AT5G16610	expressed protein
250111_at	AT5G16290	12	4		NC	NC	MC_I	1287.4	1320.6	1304	P	P	0.000732	0.000732	1783	1775.2	1779.1	P	P	0.000244	0.000732	0.5	0.4	0.4	0.2	0.375	0.125831	I	I	I	NC	3	0.2	0	NC	NC	AT5G16290	acetolactate synthase small subunit, putative similar to gi:5931761 from Nicotiana plumbaginifolia
246500_at	AT5G16270	12	4		NC	NC	MC_I	686.8	725.5	706.15	P	P	0.01416	0.00293	959.9	971	965.45	P	P	0.000732	0.00293	0.6	0.7	0.3	0.4	0.5	0.182574	I	I	I	MI	3	0	-0.3	NC	NC	AT5G16270	Rad21/Rec8-like family protein weak similarity to cohesion family protein SYN2 [Arabidopsis thaliana] GI:12006360; contains Pfam profiles PF04824: Conserved region of Rad21 / Rec8 like protein, PF04825: N terminus of Rad21 / Rec8 like protein; supporting
246518_at	AT5G15770	12	4		NC	NC	MC_D	446.3	323	384.65	P	P	0.000732	0.000244	227.7	245.5	236.6	P	P	0.001221	0.000244	-0.7	-0.4	-0.6	-0.4	-0.525	0.15	MD	D	D	NC	1	-0.4	0.1	NC	NC	AT5G15770	GCN5-related N-acetyltransferase (GNAT) family protein similar to SP|O93806 Glucosamine-phosphate N-acetyltransferase (EC 2.3.1.4) (Phosphoglucosamine transacetylase) (Phosphoglucosamine acetylase) {Candida albicans}; contains Pfam profile PF00583: acety
246562_at	AT5G15580	12	4		NC	NC	MC_I	310.4	318.5	314.45	P	P	0.000244	0.000244	482.6	392	437.3	P	P	0.000244	0.000244	0.7	0.6	0.4	0.4	0.525	0.15	I	I	NC	I	3	0.1	-0.3	NC	NC	AT5G15580	expressed protein unknown protein F14P3.18 - Arabidopsis thaliana, EMBL:AC009755
246559_at	AT5G15550	12	4		NC	NC	MC_I	1285	1436.7	1360.85	P	P	0.000732	0.000732	1711.9	1656.2	1684.05	P	P	0.000244	0.000732	0.4	0.3	0.4	0.1	0.3	0.141421	I	I	I	NC	3	0.2	-0.1	NC	NC	AT5G15550	transducin family protein / WD-40 repeat family protein similar to YTM1 - Homo sapiens, EMBL:AF242546; contains Pfam PF00400: WD domain, G-beta repeat (7 copies,1 weak);
250109_at	AT5G15230	12	4		NC	NC	MC_D	15986.6	15544.6	15765.6	P	P	0.000244	0.000244	12888.7	13755.7	13322.2	P	P	0.000244	0.000244	-0.4	-0.3	-0.3	-0.3	-0.325	0.05	D	D	D	NC	3	0	0.1	NC	NC	AT5G15230	gibberellin-regulated protein 4 (GASA4) / gibberellin-responsive protein 4 identical to SP|P46690 Gibberellin-regulated protein 4 precursor {Arabidopsis thaliana}
250222_at	AT5G14050	12	4		NC	NC	MC_I	974.1	1198.4	1086.25	P	P	0.000244	0.000244	1492.6	1461.8	1477.2	P	P	0.000244	0.000244	0.6	0.2	0.7	0.3	0.45	0.238048	I	I	I	NC	3	0.2	0	NC	NC	AT5G14050	transducin family protein / WD-40 repeat family protein contains 4 WD-40 repeats (PF00400); similar to unknown protein (ref|NP_057085.1)
250206_at	AT5G14040	12	4		NC	NC	MC_D	15453.8	17208.8	16331.3	P	P	0.000244	0.000244	12456.9	12688.2	12572.5	P	P	0.000244	0.000244	-0.3	-0.5	-0.1	-0.4	-0.325	0.170783	D	D	NC	D	3	0.2	0.2	NC	NC	AT5G14040	mitochondrial phosphate transporter identical to mitochondrial phosphate transporter GI:3318617 from [Arabidopsis thaliana]
250212_at	AT5G13960	12	4		NC	NC	MC_I	455.1	425.2	440.15	P	P	0.023926	0.023926	668.8	556.6	612.7	P	P	0.001953	0.005859	0.7	0.7	0.7	0.5	0.65	0.1	I	I	I	NC	3	0.2	-0.1	NC	NC	AT5G13960	SET domain-containing protein (SUVH4) identical to SUVH4 [Arabidopsis thaliana] GI:13517749; contains Pfam profiles PF00856: SET domain, PF05033: Pre-SET motif, PF02182: YDG/SRA domain; identical to cDNA SUVH4 (SUVH4) GI:13517748
250228_at	AT5G13840	12	4		NC	NC	MC_I	254.4	255.5	254.95	P	P	0.018555	0.023926	492.7	419.4	456.05	P	P	0.000244	0.000732	1.4	0.9	0.7	0.5	0.875	0.386221	I	I	I	MI	3	0	-0.3	NC	NC	AT5G13840	WD-40 repeat family protein contains 6 WD-40 repeats (PF00400); similar to Fzr1 (GI:6463679){Homo sapiens}
250255_at	AT5G13730	12	4		NC	NC	MC_I	961.1	699.9	830.5	P	P	0.000732	0.000732	1308.7	1148.4	1228.55	P	P	0.001221	0.001221	0.5	0.5	0.3	0.5	0.45	0.1	I	I	NC	I	3	0	-0.2	NC	NC	AT5G13730	RNA polymerase sigma subunit SigD (sigD) / sigma-like factor (SIG4) identical to RNA polymerase sigma subunit SigD [Arabidopsis thaliana] GI:4972296, sigma-like factor [Arabidopsis thaliana] GI:3983260; contains Pfam profiles PF04545: Sigma-70, region 4,
250254_at	AT5G13710	12	4		NC	NC	MC_D	6137.5	6044.7	6091.1	P	P	0.000244	0.000244	5563.8	3915.2	4739.5	P	P	0.000244	0.000244	-0.3	-0.3	-0.4	-0.4	-0.35	0.057735	D	NC	D	D	3	-0.1	-0.1	NC	NC	AT5G13710	sterol 24-C-methyltransferase, putative similar to SP:P25087 Sterol 24-C-methyltransferase, Delta(24)-sterol C- methyltransferase, Saccharomyces cerevisiae
250243_at	AT5G13630	12	4		NC	NC	MC_I	15849.9	18281.6	17065.8	P	P	0.000244	0.000244	21282.3	18824.9	20053.6	P	P	0.000244	0.000244	0.4	0.2	0.3	0.2	0.275	0.0957427	I	I	I	NC	3	0.2	-0.1	NC	NC	AT5G13630	magnesium-chelatase subunit chlH, chloroplast, putative / Mg-protoporphyrin IX chelatase, putative (CHLH) nearly identical to magnesium chelatase subunit GI:1154627 from [Arabidopsis thaliana]; contains Pfam profile: PF02514 CobN/magnesium chelatase fami
250291_at	AT5G13280	12	4		NC	NC	MC_I	1832.4	2028.3	1930.35	P	P	0.000244	0.000244	2281.4	2464	2372.7	P	P	0.000244	0.000244	0.4	0.2	0.4	0.3	0.325	0.0957427	I	NC	I	I	3	0.2	0.1	NC	NC	AT5G13280	aspartate kinase identical to aspartate kinase [Arabidopsis thaliana] GI:4376158
245181_at	AT5G12420	12	4		NC	NC	MC_I	785	534.1	659.55	P	P	0.000244	0.000732	1022.2	957.5	989.85	P	P	0.000244	0.000244	0.5	0.7	0.3	0.6	0.525	0.170783	I	I	NC	I	3	-0.2	-0.2	NC	NC	AT5G12420	expressed protein
250310_at	AT5G12230	12	4		NC	NC	MC_I	434.2	420	427.1	P	P	0.000244	0.000244	649.2	610.6	629.9	P	P	0.000244	0.000244	0.5	0.5	0.4	0.5	0.475	0.05	I	I	NC	I	3	-0.1	0.1	NC	NC	AT5G12230	expressed protein
250326_at	AT5G12080	12	4		NC	NC	MC_I	777.8	788.2	783	P	P	0.000244	0.000244	886.4	1158.9	1022.65	P	P	0.000244	0.000244	0.4	0.3	0.5	0.3	0.375	0.0957427	I	NC	I	I	3	0.1	0.2	NC	NC	AT5G12080	mechanosensitive ion channel domain-containing protein / MS ion channel domain-containing protein contains Pfam profile PF00924: Mechanosensitive ion channel
250298_at	AT5G11860	12	4		NC	NC	MC_I	1487.5	1443.9	1465.7	P	P	0.001953	0.001953	1919.6	2237.3	2078.45	P	P	0.000244	0.000732	0.3	0.4	0.4	0.3	0.35	0.057735	MI	I	NC	I	1	0	0	NC	NC	AT5G11860	NLI interacting factor (NIF) family protein contains Pfam profile PF03031: NLI interacting factor
250334_at	AT5G11770	12	4		NC	NC	MC_D	16958.5	19012.6	17985.5	P	P	0.000244	0.000244	15145.4	16360.5	15753	P	P	0.000244	0.000244	-0.3	-0.5	-0.2	-0.3	-0.325	0.125831	D	D	NC	D	3	0.2	0.1	NC	NC	AT5G11770	NADH-ubiquinone oxidoreductase 20 kDa subunit, mitochondrial identical to NADH-ubiquinone oxidoreductase 20 kDa subunit mitochondrial [precursor] SP:Q42577 from [Arabidopsis thaliana]; contains Pfam profile: PF01058 NADH ubiquinone oxidoreductase, 20 Kd
250382_at	AT5G11580	12	4		NC	NC	MC_I	1224.2	1023.2	1123.7	P	P	0.000732	0.000244	1256.2	1340.1	1298.15	P	P	0.000244	0.000244	0.3	0.3	0.4	0.3	0.325	0.05	I	NC	I	I	3	0	0.2	NC	NC	AT5G11580	UVB-resistance protein-related / regulator of chromosome condensation (RCC1) family protein contains Pfam PF00415 : Regulator of chromosome condensation (RCC1); similar to rjs protein (GI:3414809) [Mus musculus]; similar to HERC2 (GI:4079809) [Homo sapie
250421_at	AT5G11270	12	4		NC	NC	MC_I	1418	1067.2	1242.6	P	P	0.001953	0.00293	1505.5	1554.5	1530	P	P	0.001221	0.001221	0.2	0.5	0.3	0.5	0.375	0.15	I	I	NC	I	3	-0.2	0	NC	NC	AT5G11270	expressed protein
245898_at	AT5G11020	12	4		NC	NC	MC_I	157.7	164.4	161.05	P	P	0.018555	0.030273	346.4	278.2	312.3	P	P	0.000732	0.000732	0.8	1.2	0.8	0.9	0.925	0.189297	I	NC	I	I	3	0	-0.1	NC	NC	AT5G11020	protein kinase family protein contains protein kinase domain, Pfam:PF00069
250403_at	AT5G10920	12	4		NC	NC	MC_I	1476.8	1572.7	1524.75	P	P	0.000244	0.000244	2094	1908.5	2001.25	P	P	0.000244	0.000732	0.6	0.4	0.6	0.4	0.5	0.11547	I	I	I	NC	3	0.2	0	NC	NC	AT5G10920	argininosuccinate lyase, putative / arginosuccinase, putative similar to argininosuccinate lyase [Nostoc punctiforme] GI:7672743; contains Pfam profile PF00206: Lyase
250394_at	AT5G10910	12	4		NC	NC	MC_I	598.5	504.7	551.6	P	P	0.000244	0.000244	723.3	714.9	719.1	P	P	0.000244	0.000244	0.4	0.6	0.4	0.5	0.475	0.0957427	I	I	NC	I	3	-0.2	0	NC	NC	AT5G10910	mraW methylase family protein contains Pfam profile PF01795: MraW methylase family
250433_at	AT5G10400	12	4	I	NC		MC_I	1543.6	713.9	1128.75	P	P	0.000244	0.000244	2238.6	2120.7	2179.65	P	P	0.000244	0.000244	0.9	1.1	0.8	1.1	0.975	0.15	I	I	I	I	4	-0.4	-0.1	D	NC	AT5G10400	histone H3 identical to several histone H3 proteins, including Zea mays SP|P05203, Medicago sativa GI:166384, Encephalartos altensteinii SP|P08903, Pisum sativum SP|P02300; contains Pfam profile PF00125 Core histone H2A/H2B/H3/H4
250475_at	AT5G10180	12	4		NC	NC	MC_D	2015.5	2104.3	2059.9	P	P	0.000244	0.000244	1452.1	1510	1481.05	P	P	0.000244	0.000244	-0.4	-0.2	-0.6	-0.4	-0.4	0.163299	D	NC	D	D	3	-0.3	-0.2	NC	NC	AT5G10180	sulfate transporter identical to sulfate transporter [Arabidopsis thaliana] GI:2114104
250463_at	AT5G10030	12	4		NC	NC	MC_I	494.8	347.8	421.3	P	P	0.000244	0.000732	570.2	723.5	646.85	P	P	0.000244	0.000244	0.5	0.7	0.5	0.9	0.65	0.191485	NC	I	I	I	1	-0.4	0.3	NC	NC	AT5G10030	bZIP family transcription factor (OBF4) identical to ocs-element binding factor 4 GI:414613 from [Arabidopsis thaliana]
250457_at	AT5G09880	12	4		NC	NC	MC_I	829.4	972.2	900.8	P	P	0.000732	0.000732	1489.4	1185.2	1337.3	P	P	0.000244	0.000244	0.8	0.5	0.5	0.3	0.525	0.206155	I	I	I	MI	3	0.3	-0.2	NC	NC	AT5G09880	RNA recognition motif (RRM)-containing protein
250538_at	AT5G08620	12	4		NC	NC	MC_I	875.1	1473.8	1174.45	P	P	0.000244	0.000244	2003.6	1802.6	1903.1	P	P	0.000244	0.000244	0.7	0.4	0.7	0.4	0.55	0.173205	I	NC	I	I	3	0.5	0.1	NC	NC	AT5G08620	DEAD box RNA helicase (RH25) identical to RNA helicase [Arabidopsis thaliana] GI:3776023; contains Pfam profiles PF00270: DEAD/DEAH box helicase, PF00271: Helicase conserved C-terminal domain
246058_at	AT5G08430	12	4		NC	NC	MC_I	474.1	399	436.55	P	P	0.000244	0.000244	739.8	519.1	629.45	P	P	0.000244	0.000244	0.5	0.7	0.3	0.6	0.525	0.170783	I	I	NC	I	3	-0.2	0	NC	NC	AT5G08430	SWIB complex BAF60b domain-containing protein / plus-3 domain-containing protein / GYF domain-containing protein similar to CPRF interacting protein [Petroselinum crispum] GI:9588690; contains Pfam profiles PF02201: BAF60b domain of the SWIB complex, PF0
246005_at	AT5G08415	12	4		NC	NC	MC_I	1125.2	1405.3	1265.25	P	P	0.000244	0.000244	1518.9	1366.6	1442.75	P	P	0.000244	0.000244	0.4	0.3	0.3	0.2	0.3	0.0816497	I	I	I	NC	3	0.1	-0.1	NC	NC	AT5G08415	lipoic acid synthase family protein similar to lipoic acid synthase from Arabidopsis thaliana [gi:3928758], from Mus musculus [gi:14669826] Pfam profile PF04055: radical SAM domain protein
250560_at	AT5G08020	12	4		NC	NC	MC_I	604.5	570.8	587.65	P	P	0.00415	0.010742	675.1	811.8	743.45	P	P	0.001221	0.001221	0.4	0.5	0.6	0.7	0.55	0.129099	NC	I	I	I	1	-0.3	0.3	NC	NC	AT5G08020	replication protein, putative similar to replication protein A1 [Oryza sativa] GI:2258469; contains InterPro entry IPR004365: OB-fold nucleic acid binding domain
250580_at	AT5G07440	12	4		NC	NC	MC_D	6509.5	6648.1	6578.8	P	P	0.000244	0.000244	5039.7	5545	5292.35	P	P	0.000244	0.000244	-0.4	-0.5	-0.2	-0.3	-0.35	0.129099	D	D	NC	D	3	0.1	0	NC	NC	AT5G07440	glutamate dehydrogenase 2 (GDH2) identical to glutamate dehydrogenase 2 (GDH 2) [Arabidopsis thaliana] SWISS-PROT:Q38946
250663_at	AT5G07110	12	4		NC	NC	MC_D	752.8	1198.4	975.6	P	P	0.000244	0.000244	700	736.2	718.1	P	P	0.000732	0.000244	-0.3	-0.8	-0.3	-0.8	-0.55	0.288675	D	D	NC	D	3	0.4	0.1	NC	NC	AT5G07110	prenylated rab acceptor (PRA1) family protein weak similarity to prenylated Rab acceptor 1 (PRA1) [Homo sapiens] GI:4877285; contains Pfam profile PF03208: Prenylated rab acceptor (PRA1)
250669_at	AT5G06870	12	4	D		NC	MC_D	1965.7	2340.1	2152.9	P	P	0.000244	0.000244	855.3	1220.2	1037.75	P	P	0.000244	0.000244	-1	-1.2	-0.7	-0.7	-0.9	0.244949	D	D	D	D	4	0.2	0.4	NC	I	AT5G06870	polygalacturonase inhibiting protein 2 (PGIP2) identical to polygalacturonase inhibiting protein 2 (PGIP2) [Arabidopsis thaliana] gi|7800201|gb|AAF69828; contains leucine rich-repeat (LRR) domains Pfam:PF00560, INTERPRO:IPR001611
250705_at	AT5G06340	12	4		NC	NC	MC_I	2624.2	2713	2668.6	P	P	0.000732	0.000732	4431.9	3333	3882.45	P	P	0.000244	0.000732	0.6	0.6	0.3	0.4	0.475	0.15	I	I	I	NC	3	0.1	-0.2	NC	NC	AT5G06340	diadenosine 5',5'''-P1,P4-tetraphosphate hydrolase, putative similar to diadenosine 5',5'''-P1,P4-tetraphosphate hydrolase from [Lupinus angustifolius] GI:1888557, [Hordeum vulgare subsp. vulgare] GI:2564253; contains Pfam profile PF00293: NUDIX domain
250793_at	AT5G05600	12	4	D		NC	MC_D	2129.2	2486.9	2308.05	P	P	0.001953	0.001953	825.7	1535.8	1180.75	P	P	0.00293	0.001953	-1.4	-1.3	-0.5	-0.5	-0.925	0.492443	D	D	D	D	4	0.1	0.7	NC	I	AT5G05600	oxidoreductase, 2OG-Fe(II) oxygenase family protein similar to flavonol synthase [Citrus unshiu][gi:4126403], leucoanthocyanidin dioxygenase [Daucus carota][gi:5924383]; contains PF03171 2OG-Fe(II) oxygenase superfamily domain
250778_at	AT5G05500	12	4		NC	NC	MC_D	816.7	995.3	906	P	P	0.001221	0.00293	516.2	570	543.1	P	P	0.005859	0.008057	-0.7	-0.7	-0.6	-0.5	-0.625	0.0957427	D	NC	D	MD	2	-0.1	-0.1	NC	NC	AT5G05500	pollen Ole e 1 allergen and extensin family protein contains Pfam domain, PF01190: Pollen proteins Ole e I family
250798_at	AT5G05340	12	4	D	NC		MC_D	293	494.2	393.6	P	P	0.000244	0.001221	185.2	198.8	192	P	P	0.000732	0.010742	-0.7	-1.2	-0.7	-1.1	-0.925	0.262996	D	D	D	D	4	0.5	0.2	I	NC	AT5G05340	peroxidase, putative similar to peroxidase [Nicotiana tabacum] gi|5381253|dbj|BAA82306; similar to Peroxidase P7 [Brassica rapa (Turnip)] SWISS-PROT:P00434
250817_at	AT5G04940	12	4		NC	NC	MC_I	530.5	590.5	560.5	P	P	0.001221	0.001953	627.9	710.6	669.25	P	P	0.000732	0.000732	0.3	0.2	0.4	0.3	0.3	0.0816497	I	NC	MI	I	2	0.1	0	NC	NC	AT5G04940	SET domain-containing protein (SUVH1) contains Pfam profiles PF00856: SET domain, PF05033: Pre-SET motif, PF02182: YDG/SRA domain; identical to cDNA SUVH1 (SUVH1) GI:13517742
250845_at	AT5G04600	12	4		NC	NC	MC_I	2329.6	2510.9	2420.25	P	P	0.000244	0.000244	3098.1	2948.8	3023.45	P	P	0.000244	0.000244	0.3	0.3	0.4	0.2	0.3	0.0816497	I	I	I	NC	3	0	-0.1	NC	NC	AT5G04600	RNA recognition motif (RRM)-containing protein contains InterPro entry IPR000504: RNA-binding region RNP-1 (RNA recognition motif) (RRM)
250843_at	AT5G04430	12	4		NC	NC	MC_I	3017.4	3145.5	3081.45	P	P	0.000244	0.000244	3828.3	3550.7	3689.5	P	P	0.000244	0.000244	0.5	0.3	0.2	0.2	0.3	0.141421	I	I	I	NC	3	0.1	-0.1	NC	NC	AT5G04430	KH domain-containing protein NOVA, putative astrocytic NOVA-like RNA-binding protein, Homo sapiens, U70477
250900_at	AT5G03470	12	4		NC	NC	MC_I	531.7	415.5	473.6	P	P	0.001221	0.008057	741.6	756.5	749.05	P	P	0.000732	0.000732	0.2	0.6	0.5	0.8	0.525	0.25	NC	I	I	I	1	-0.3	0.2	NC	NC	AT5G03470	serine/threonine protein phosphatase 2A (PP2A) regulatory subunit B' (B'alpha) similar to SWISS-PROT:Q28653 serine/threonine protein phosphatase 2A, 56 kDa regulatory subunit, delta isoform (PP2A, B subunit, B' delta isoform, PP2A, B subunit, B56 delta i
250923_at	AT5G03455	12	4		NC	NC	MC_D	6127.5	6414.4	6270.95	P	P	0.000244	0.000244	4180.6	5037.4	4609	P	P	0.000244	0.000244	-0.6	-0.5	-0.4	-0.3	-0.45	0.129099	D	D	D	NC	3	-0.1	0.2	NC	NC	AT5G03455	rhodanese-like domain-containing protein contains Rhodanese-like domain PF:00581
250985_at	AT5G02830	12	4		NC	NC	MC_I	606.1	562.6	584.35	P	P	0.00415	0.008057	965	831.5	898.25	P	P	0.001953	0.005859	0.4	0.8	0.1	0.6	0.475	0.298608	I	I	NC	MI	2	-0.3	-0.3	NC	NC	AT5G02830	pentatricopeptide (PPR) repeat-containing protein contains Pfam profile PF01535: PPR repeat
250971_at	AT5G02810	12	4		NC	NC	MC_I	509.6	492.9	501.25	P	P	0.000732	0.000244	740.2	659.9	700.05	P	P	0.000244	0.000244	0.8	0.6	0.5	0.4	0.575	0.170783	I	I	I	MI	3	0.1	-0.2	NC	NC	AT5G02810	pseudo-response regulator 7 (APRR7) identical to pseudo-response regulator 7 GI:10281004 from [Arabidopsis thaliana]
250970_at	AT5G02770	12	4		NC	NC	MC_I	1336.5	1028.5	1182.5	P	P	0.001221	0.000244	1369.3	1568	1468.65	P	P	0.000244	0.000244	0.3	0.4	0.3	0.4	0.35	0.057735	NC	I	I	I	1	-0.1	0	NC	NC	AT5G02770	expressed protein
251024_at	AT5G02180	12	4		NC	NC	MC_I	420	359.5	389.75	P	P	0.005859	0.008057	627.4	490.4	558.9	P	P	0.000732	0.00415	0.6	0.5	0.3	0.3	0.425	0.15	I	I	I	NC	3	0.2	-0.2	NC	NC	AT5G02180	amino acid transporter family protein belongs to INTERPRO:IPR002422 amino acid/polyamine transporter, family II
251083_at	AT5G01590	12	4		NC	NC	MC_I	1551.4	1341	1446.2	P	P	0.008057	0.001221	1261.1	1864	1562.55	P	P	0.000732	0.001221	0.3	0.1	0.5	0.3	0.3	0.163299	I	NC	I	MI	2	0.2	0.1	NC	NC	AT5G01590	expressed protein
251054_at	AT5G01540	11	4		NC	NC	MC_D	629.4	731.5	680.45	P	P	0.00415	0.005859	377.8	331.3	354.55	P	P	0.00415	0.01416	-0.5	-0.7	-0.9	-0.9	-0.75	0.191485	NC	D	D	D	1	0.2	-0.4	NC	NC	AT5G01540	lectin protein kinase, putative similar to receptor lectin kinase 3 [Arabidopsis thaliana] gi|4100060|gb|AAD00733; contains protein kinase domain, Pfam:PF00069; contains legume lectins alpha and beta domains, Pfam:PF00138 and Pfam:PF00139
251144_at	AT5G01210	12	4		NC	NC	MC_D	2659.9	2602.9	2631.4	P	P	0.000244	0.000244	1628.2	1941.8	1785	P	P	0.000244	0.000244	-0.7	-0.6	-0.4	-0.4	-0.525	0.15	D	D	D	NC	3	0	0.3	NC	NC	AT5G01210	transferase family protein contains Pfam profile PF02458 transferase family
252880_at	AT4G39730	12	4	D	NC		MC_D	14358.7	18518.1	16438.4	P	P	0.000244	0.000244	8791.2	9627.9	9209.55	P	P	0.000244	0.000244	-0.7	-1.1	-0.6	-1	-0.85	0.238048	D	D	D	D	4	0.4	0.2	I	NC	AT4G39730	lipid-associated family protein contains PLAT/LH2 (Polycystin-1, Lipoxygenase, Alpha-Toxin/Lipoxygenase homology) domain Pfam:PF01477
252909_at	AT4G39680	12	4		NC	NC	MC_I	1448.8	1326.3	1387.55	P	P	0.001221	0.000244	1740.6	1892	1816.3	P	P	0.000732	0.000244	0.5	0.2	0.5	0.3	0.375	0.15	I	NC	I	I	3	0.2	0.1	NC	NC	AT4G39680	SAP domain-containing protein contains Pfam domain PF02037: SAP domain
252904_at	AT4G39620	12	4		NC	NC	MC_I	556.3	494.4	525.35	P	P	0.000244	0.000244	757	760.7	758.85	P	P	0.000244	0.000244	0.5	0.7	0.3	0.6	0.525	0.170783	I	I	NC	I	3	-0.3	-0.1	NC	NC	AT4G39620	pentatricopeptide (PPR) repeat-containing protein contains Pfam profile PF01535: PPR repeat
252878_at	AT4G39460	12	4		NC	NC	MC_I	2578.5	2782.3	2680.4	P	P	0.000244	0.000244	3466	3586.5	3526.25	P	P	0.000244	0.000244	0.5	0.4	0.3	0.2	0.35	0.129099	I	I	MI	NC	2	0.1	-0.1	NC	NC	AT4G39460	mitochondrial substrate carrier family protein
252934_at	AT4G39120	12	4		NC	NC	MC_I	1316.5	935.3	1125.9	P	P	0.001953	0.001221	1751.6	1423.7	1587.65	P	P	0.000244	0.001221	0.4	0.3	0.3	0.2	0.3	0.0816497	I	NC	I	I	3	0.1	0	NC	NC	AT4G39120	inositol monophosphatase family protein low similarity to Mono-phosphatase [Streptomyces anulatus] GI:1045231; contains Pfam profile PF00459: Inositol monophosphatase family
252926_at	AT4G38920	12	4		NC	NC	MC_D	19953.8	21094.1	20524	P	P	0.000244	0.000244	15598.8	16849.4	16224.1	P	P	0.000244	0.000244	-0.3	-0.5	-0.2	-0.4	-0.35	0.129099	D	D	MD	NC	2	0.2	0.1	NC	NC	AT4G38920	vacuolar ATP synthase 16 kDa proteolipid subunit 3 / V-ATPase 16 kDa proteolipid subunit 3 (AVAP3) (AVA-P3) identical to SP|P59227 Vacuolar ATP synthase 16 kDa proteolipid subunit 1/3/5 (EC 3.6.3.14) (V-ATPase 16 kDa proteolipid subunit 1/3/5) {Arabidops
252968_at	AT4G38890	12	4		NC	NC	MC_I	1151.6	1167.7	1159.65	P	P	0.000244	0.000244	1887	1899.8	1893.4	P	P	0.000244	0.000244	0.6	0.5	0.5	0.4	0.5	0.0816497	I	I	I	NC	3	0.2	-0.1	NC	NC	AT4G38890	dihydrouridine synthase family protein contains Pfam domain, PF01207: Dihydrouridine synthase (Dus)
252996_s_at	AT4G38460	12	4	D		NC	MC_D	2744	2857.4	2800.7	P	P	0.000244	0.000244	1411.5	1695.2	1553.35	P	P	0.000244	0.000244	-0.8	-0.9	-0.5	-0.7	-0.725	0.170783	D	D	D	D	4	0.3	0.3	NC	I	AT4G38460	geranylgeranyl pyrophosphate synthase, putative / GGPP synthetase, putative / farnesyltranstransferase, putative 65% similar to geranylgeranyl pyrophosphate synthase [GI:413730];
253006_at	AT4G38260;AT4G38250	12	4		NC	NC	MC_D	6161.1	6936.8	6548.95	P	P	0.000244	0.000244	4642.7	5438.8	5040.75	P	P	0.000244	0.000244	-0.5	-0.6	-0.1	-0.4	-0.4	0.216025	D	D	NC	D	3	0.1	0.2	NC	NC	AT4G38260;AT4G38250	[AT4G38260, expressed protein contains Pfam PF05742: Protein of unknown function (DUF833)];[AT4G38250, amino acid transporter family protein low similarity to lysosomal amino acid transporter 1 [Rattus norvegicus] GI:14571904; contains Pfam profile PF01
253010_at	AT4G37750	12	4		NC	NC	MC_I	464.5	321.7	393.1	P	P	0.008057	0.010742	698.8	552.4	625.6	P	P	0.000244	0.00293	0.5	0.7	0.2	0.4	0.45	0.208167	I	I	NC	I	3	-0.4	-0.2	NC	NC	AT4G37750	ovule development protein aintegumenta (ANT) identical to ovule development protein aintegumenta (ANT) (GI:1244708) ) [Arabidopsis thaliana]
253042_at	AT4G37550	12	4		NC	NC	MC_I	1686.5	1662.6	1674.55	P	P	0.000244	0.000244	2332.5	2231.3	2281.9	P	P	0.000244	0.000244	0.4	0.3	0.3	0.4	0.35	0.057735	I	I	I	NC	3	0	-0.1	NC	NC	AT4G37550	formamidase, putative / formamide amidohydrolase, putative similar to SP|Q50228 Formamidase (EC 3.5.1.49) (Formamide amidohydrolase) {Methylophilus methylotrophus}; contains Pfam profile PF03069: Acetamidase/Formamidase family
253095_at	AT4G37510	12	4	I		NC	MC_I	1890.8	1830.1	1860.45	P	P	0.001221	0.001953	3024.4	2551.8	2788.1	P	P	0.000732	0.000732	0.7	0.6	0.4	0.3	0.5	0.182574	I	I	I	I	4	0.1	-0.2	NC	D	AT4G37510	ribonuclease III family protein contains Pfam profile PF00636 RNase3 domain
253073_at	AT4G37410	12	4		NC	NC	MC_D	2124.9	2331.4	2228.15	P	P	0.000244	0.000244	1354.7	1301	1327.85	P	P	0.000732	0.000732	-0.5	-0.5	-0.5	-0.3	-0.45	0.1	D	D	D	NC	3	-0.1	0.1	NC	NC	AT4G37410	cytochrome P450, putative similar to cytochrome p450 SP:O65790 from [Arabidopsis thaliana]
253049_at	AT4G37300	12	4		NC	NC	MC_I	3747.2	3181.4	3464.3	P	P	0.000244	0.000244	5016.7	4538.7	4777.7	P	P	0.000244	0.000244	0.3	0.4	0.3	0.5	0.375	0.0957427	I	I	NC	I	3	-0.1	-0.1	NC	NC	AT4G37300	expressed protein
246231_at	AT4G37080	12	4		NC	NC	MC_I	351.2	309.4	330.3	P	P	0.000732	0.000732	579.1	552.8	565.95	P	P	0.001953	0.000732	0.6	0.8	0.6	0.7	0.675	0.0957427	I	I	NC	I	3	-0.1	-0.2	NC	NC	AT4G37080	expressed protein contains Pfam profile PF04784: Protein of unknown function, DUF547
246211_at	AT4G36730	12	4		NC	NC	MC_I	948.5	1007.2	977.85	P	P	0.000244	0.000244	1158.2	1239.7	1198.95	P	P	0.000244	0.000244	0.3	0.4	0.3	0.3	0.325	0.05	NC	I	I	I	1	-0.1	0	NC	NC	AT4G36730	G-box binding factor 1 (GBF1) identical to G-box binding factor 1 SP:P42774 from [Arabidopsis thaliana]; contains Pfam profile: PF00170 bZIP transcription factor
246275_at	AT4G36540	12	4	I	NC		MC_I	1494.8	971.9	1233.35	P	P	0.001221	0.010742	2053.7	2034.4	2044.05	P	P	0.000732	0.001221	0.5	1	0.5	1.1	0.775	0.320156	I	I	I	I	4	-0.5	0	D	NC	AT4G36540	basic helix-loop-helix (bHLH) family protein contains Pfam domain, PF00010: Helix-loop-helix DNA-binding domain
253078_at	AT4G36180	12	4		NC	NC	MC_I	671.6	857.9	764.75	P	P	0.001953	0.00415	1142.6	1015.5	1079.05	P	P	0.001221	0.001221	0.5	0.3	0.6	0.2	0.4	0.182574	I	I	I	NC	3	0.3	0.1	NC	NC	AT4G36180	leucine-rich repeat family protein contains protein kinase domain, Pfam:PF00069; contains leucine-rich repeats, Pfam:PF00560
253156_at	AT4G35730	12	4		NC	NC	MC_I	250.6	239.5	245.05	P	P	0.01416	0.023926	416.4	476.1	446.25	P	P	0.000732	0.008057	1.1	0.9	0.7	0.7	0.85	0.191485	I	I	I	NC	3	-0.2	-0.3	NC	NC	AT4G35730	expressed protein contains Pfam profile: PF03398 eukaryotic protein of unknown function, DUF292
253197_at	AT4G35250	12	4		NC	NC	MC_I	5249.9	5274.3	5262.1	P	P	0.000244	0.000244	6674.3	6095.8	6385.05	P	P	0.000244	0.000244	0.4	0.2	0.3	0.2	0.275	0.0957427	I	I	NC	I	3	0	-0.2	NC	NC	AT4G35250	vestitone reductase-related low similarity to vestitone reductase [Medicago sativa subsp. sativa] GI:973249
253225_at	AT4G35020	12	4		NC	NC	MC_I	860.6	837.3	848.95	P	P	0.000244	0.000244	1112.1	1169.6	1140.85	P	P	0.000244	0.000244	0.3	0.5	0.4	0.6	0.45	0.129099	NC	I	MI	I	1	-0.1	0	NC	NC	AT4G35020	Rac-like GTP-binding protein (ARAC3) / Rho-like GTP-binding protein (ROP6) identical to SP|Q38912 RAC-like GTP binding protein ARAC3 (GTP-binding protein ROP6) {Arabidopsis thaliana}; identical to cDNA Rho-like GTP binding protein (Rop6) GI:2645642
253245_at	AT4G34590	12	4		NC	NC	MC_I	1915.7	2258.4	2087.05	P	P	0.000244	0.000244	2899	2941.3	2920.15	P	P	0.000244	0.000244	0.6	0.3	0.4	0.3	0.4	0.141421	I	I	I	NC	3	0.1	-0.1	NC	NC	AT4G34590	bZIP transcription factor family protein similar to common plant regulatory factor 7 GI:9650828 from [Petroselinum crispum]
253286_at	AT4G34260	12	4		NC	NC	MC_I	904.3	1079.1	991.7	P	P	0.000244	0.000244	1486.8	1270.2	1378.5	P	P	0.000244	0.000244	0.4	0.4	0.4	0.3	0.375	0.05	I	I	I	MI	3	0.1	-0.1	NC	NC	AT4G34260	expressed protein
253281_at	AT4G34138	12	4		NC	NC	MC_I	621	628.2	624.6	P	P	0.000244	0.000244	1093.3	1044.5	1068.9	P	P	0.000244	0.000244	0.8	0.6	0.6	0.5	0.625	0.125831	I	I	I	MI	3	0.2	-0.3	NC	NC	AT4G34138	UDP-glucoronosyl/UDP-glucosyl transferase family protein contains Pfam profile: PF00201 UDP-glucoronosyl and UDP-glucosyl transferase
253283_at	AT4G34090	12	4		NC	NC	MC_I	1635.8	1419	1527.4	P	P	0.000244	0.000244	2066.6	1748.4	1907.5	P	P	0.000244	0.000244	0.3	0.5	0.1	0.4	0.325	0.170783	I	I	NC	I	3	-0.3	-0.1	NC	NC	AT4G34090	expressed protein
253276_at	AT4G34050	12	4		NC	NC	MC_D	18258.9	19727.2	18993	P	P	0.000244	0.000244	15841.8	14980.5	15411.1	P	P	0.000244	0.000244	-0.2	-0.4	-0.3	-0.5	-0.35	0.129099	MD	D	D	D	1	0.2	-0.1	NC	NC	AT4G34050	caffeoyl-CoA 3-O-methyltransferase, putative nearly identical to GI:2960356 [Populus balsamifera subsp. trichocarpa], GI:684942 [Medicago sativa subsp. sativa] isoform contains a GT-TG intron which removes an internal segment of the protein.
253296_at	AT4G33770	10	4		NC	NC	MC_I	419	400.4	409.7	P	P	0.037598	0.037598	574.4	594.9	584.65	P	P	0.023926	0.037598	0.7	0.7	0.6	0.6	0.65	0.057735	MI	I	NC	I	1	-0.1	0	NC	NC	AT4G33770	inositol 1,3,4-trisphosphate 5/6-kinase family protein contains Pfam doamin PF05770 Inositol 1, 3, 4-trisphosphate 5/6-kinase; contains weak similarity to inositol phosphate kinase (GI:27549256) [Zea mays]
253301_at	AT4G33720	12	4	D		NC	MC_D	29284.5	36252	32768.2	P	P	0.000244	0.000244	12164.4	13889	13026.7	P	P	0.000244	0.000244	-1.4	-1.4	-1	-1	-1.2	0.23094	D	D	D	D	4	0.1	0.3	NC	I	AT4G33720	pathogenesis-related protein, putative similar to SP|P33154 Pathogenesis-related protein 1 precursor (PR-1) {Arabidopsis thaliana}; contains Pfam profile PF00188: SCP-like extracellular protein
253335_at	AT4G33500	12	4		NC	NC	MC_I	1128.2	1037.5	1082.85	P	P	0.000244	0.000244	1371.6	1367.6	1369.6	P	P	0.000244	0.000244	0.4	0.5	0.3	0.4	0.4	0.0816497	I	I	NC	I	3	-0.2	-0.1	NC	NC	AT4G33500	protein phosphatase 2C-related / PP2C-related YHR077c (NMD2,IFS1) protein -Saccharomyces cerevisiae,PID:g555939
253340_s_at	AT4G33270;AT4G33260	12	4	I		NC	MC_I	506.7	581.5	544.1	P	P	0.000244	0.000244	1372.3	988.1	1180.2	P	P	0.000244	0.000244	1.2	1	0.9	0.8	0.975	0.170783	I	I	I	I	4	0.1	-0.3	NC	D	AT4G33270;AT4G33260	[AT4G33270, WD-40 repeat family protein contains 6 WD-40 repeats (PF00400); WD-repeat protein -Daucus carota,PID:g2253631];[AT4G33260, WD-40 repeat family protein contains 6 WD-40 repeats (PF00400); WD-repeat protein -Daucus carota, PID:g2253631]
253368_at	AT4G33200	12	4		NC	NC	MC_I	590.6	640.9	615.75	P	P	0.000244	0.000732	732.9	737.3	735.1	P	P	0.000732	0.000244	0.6	0.7	0.6	0.4	0.575	0.125831	NC	I	I	I	1	0	0	NC	NC	AT4G33200	myosin, putative similar to myosin (GI:433663) [Arabidopsis thaliana]
253359_at	AT4G33080	12	4		NC	NC	MC_I	853.7	908	880.85	P	P	0.000244	0.000244	1067.1	1002.3	1034.7	P	P	0.000244	0.000244	0.4	0.4	0.3	0.2	0.325	0.0957427	I	I	I	MI	3	0.2	-0.2	NC	NC	AT4G33080	protein kinase, putative contains protein kinase domain, Pfam:PF00069
253382_at	AT4G33040	12	4		NC	NC	MC_D	799.6	1003.2	901.4	P	P	0.000732	0.000244	592.3	845.3	718.8	P	P	0.001953	0.000244	-0.5	-0.8	-0.3	-0.6	-0.55	0.208167	D	D	NC	D	3	0.3	0.3	NC	NC	AT4G33040	glutaredoxin family protein contains INTERPRO Domain IPR002109, Glutaredoxin (thioltransferase)
253386_at	AT4G33030	12	4		NC	NC	MC_I	4253.1	5304.4	4778.75	P	P	0.000244	0.000244	7235	6997.2	7116.1	P	P	0.000244	0.000244	0.7	0.4	0.6	0.3	0.5	0.182574	I	I	I	NC	3	0.2	-0.2	NC	NC	AT4G33030	UDP-sulfoquinovose synthase / sulfite:UDP-glucose sulfotransferase / sulfolipid biosynthesis protein (SQD1) identical to gi:2736155
253412_at	AT4G33000	12	4		NC	NC	MC_I	794	592.5	693.25	P	P	0.000244	0.000244	1001.7	910.6	956.15	P	P	0.000244	0.000732	0.5	0.8	0.5	1	0.7	0.244949	I	I	NC	I	3	-0.2	0	NC	NC	AT4G33000	calcineurin B-like protein 10 (CBL10) identical to calcineurin B-like protein 10 [Arabidopsis thaliana] GI:29150248
253403_at	AT4G32830	12	4	I		NC	MC_I	808.6	575.1	691.85	P	P	0.000244	0.000244	1344.9	1192	1268.45	P	P	0.000244	0.000732	0.8	1.1	0.6	0.8	0.825	0.206155	I	I	I	I	4	-0.3	-0.3	NC	MD	AT4G32830	protein kinase, putative similar to protein kinase p46XlEg22 [Xenopus laevis] gi|609280|emb|CAA78914; contains protein kinase domain, Pfam:PF00069
253438_at	AT4G32520	12	4		NC	NC	MC_I	2243.6	2277.5	2260.55	P	P	0.000732	0.000244	2978.2	2784.1	2881.15	P	P	0.000732	0.000732	0.5	0.4	0.4	0.3	0.4	0.0816497	I	I	I	NC	3	0.1	0	NC	NC	AT4G32520	glycine hydroxymethyltransferase, putative / serine hydroxymethyltransferase, putative / serine/threonine aldolase, putative similar to serine hydroxymethyltransferase [Chlamydomonas reinhardtii] GI:17066746; contains Pfam profile PF00464: serine hydroxy
253429_at	AT4G32420	12	4		NC	NC	MC_I	1044.5	1308.6	1176.55	P	P	0.000244	0.000244	1493	1375.6	1434.3	P	P	0.000244	0.000244	0.5	0.4	0.5	0.3	0.425	0.0957427	I	I	I	NC	3	0.1	-0.1	NC	NC	AT4G32420	peptidyl-prolyl cis-trans isomerase cyclophilin-type family protein weak similarity to CARS-Cyp [Homo sapiens] GI:1117968; contains Pfam profile PF00160: peptidyl-prolyl cis-trans isomerase, cyclophilin-type
253462_at	AT4G32150	12	4		NC	NC	MC_D	3462.7	3618	3540.35	P	P	0.000244	0.000244	2789.1	2559.3	2674.2	P	P	0.000244	0.000244	-0.4	-0.4	-0.3	-0.3	-0.35	0.057735	D	D	D	NC	3	0	0.1	NC	NC	AT4G32150	synaptobrevin family protein similar to Synaptobrevin-like protein 1 (SP:P51809) [Homo sapiens]
253457_at	AT4G32060	12	4		NC	NC	MC_I	3479.2	3292.8	3386	P	P	0.000244	0.000244	4773.7	4028.9	4401.3	P	P	0.000244	0.000244	0.5	0.4	0.2	0.3	0.35	0.129099	I	I	NC	I	3	-0.1	-0.2	NC	NC	AT4G32060	calcium-binding EF hand family protein contains INTERPRO:IPR002048 calcium-binding EF-hand domain
253534_at	AT4G31500	12	4	D		NC	MC_D	10154.8	12454.4	11304.6	P	P	0.000244	0.000244	6048.2	8589.7	7318.95	P	P	0.000244	0.000244	-0.9	-1.1	-0.5	-0.7	-0.8	0.258199	D	D	D	D	4	0.2	0.5	NC	I	AT4G31500	cytochrome P450 83B1 (CYP83B1) Identical to Cytochrome P450 (SP:O65782 )[Arabidopsis thaliana]
253524_at	AT4G31430	12	4		NC	NC	MC_I	465.1	448.4	456.75	P	P	0.000244	0.000244	626.3	670	648.15	P	P	0.000244	0.000244	0.5	0.6	0.5	0.5	0.525	0.05	I	NC	I	I	3	0	0	NC	NC	AT4G31430	expressed protein
253549_at	AT4G30930	12	4		NC	NC	MC_I	954.7	1146.5	1050.6	P	P	0.000244	0.000244	1663.5	1460.6	1562.05	P	P	0.000244	0.000244	0.5	0.3	0.4	0.3	0.375	0.0957427	I	I	I	NC	3	0.1	-0.2	NC	NC	AT4G30930	50S ribosomal protein L21, mitochondrial (RPL21M) identical to SP|Q8L9A0 50S ribosomal protein L21, mitochondrial precursor {Arabidopsis thaliana}
253552_at	AT4G30890	12	4		NC	NC	MC_I	1614.9	1344.3	1479.6	P	P	0.000732	0.000732	2080.7	2064.6	2072.65	P	P	0.000244	0.000244	0.3	0.4	0.3	0.3	0.325	0.05	I	I	NC	MI	2	-0.1	0	NC	NC	AT4G30890	ubiquitin-specific protease 24, putative (UBP24) identical to ubiquitin-specific protease 24 [Arabidopsis thaliana] GI:11993488
253599_at	AT4G30860	12	4		NC	NC	MC_I	269.8	296.3	283.05	P	P	0.000244	0.010742	430.6	614.7	522.65	P	P	0.000244	0.000244	0.7	0.8	1	1.1	0.9	0.182574	NC	I	I	I	1	0	0.3	NC	NC	AT4G30860	SET domain-containing protein low similarity to IL-5 promoter REII-region-binding protein [Homo sapiens] GI:12642795; contains Pfam profile PF00856: SET domain
253585_at	AT4G30720	12	4		NC	NC	MC_I	509.6	492.8	501.2	P	P	0.000244	0.000244	929.7	776.4	853.05	P	P	0.000244	0.000244	0.9	0.8	0.5	0.4	0.65	0.238048	I	I	I	MI	3	0.2	-0.4	NC	NC	AT4G30720	expressed protein hypothetical protein - Synechocystis sp. (strain PCC 6803),PIR2:S76076
253670_at	AT4G30010	12	4		NC	NC	MC_D	13174.5	13325.1	13249.8	P	P	0.000244	0.000244	9109.3	9880.9	9495.1	P	P	0.000244	0.000244	-0.4	-0.5	-0.3	-0.3	-0.375	0.0957427	D	D	MD	NC	2	0	0.1	NC	NC	AT4G30010	expressed protein
253643_at	AT4G29780	12	4		NC	NC	MC_I	258.9	307.2	283.05	P	P	0.008057	0.000244	379.9	377.9	378.9	P	P	0.000244	0.001221	0.6	0.5	0.7	0.5	0.575	0.0957427	I	I	I	NC	3	0.2	-0.1	NC	NC	AT4G29780	expressed protein
253730_at	AT4G29480	12	4		NC	NC	MC_D	9380.7	7586.6	8483.65	P	P	0.000244	0.000244	7279.9	6685.6	6982.75	P	P	0.000244	0.000244	-0.3	-0.2	-0.4	-0.2	-0.275	0.0957427	D	NC	D	D	3	-0.1	-0.1	NC	NC	AT4G29480	mitochondrial ATP synthase g subunit family protein contains Pfam profile: PF04718 mitochondrial ATP synthase g subunit
253758_at	AT4G29060	12	4		NC	NC	MC_I	6221.2	5567.6	5894.4	P	P	0.000244	0.000244	8830.5	6894.4	7862.45	P	P	0.000244	0.000244	0.6	0.6	0.2	0.3	0.425	0.206155	I	I	NC	I	3	0	-0.3	NC	NC	AT4G29060	elongation factor Ts family protein similar to SP|P35019 Elongation factor Ts (EF-Ts) {Galdieria sulphuraria}; contains Pfam profiles PF00627: UBA/TS-N domain, PF00889: Elongation factor TS, PF00575: S1 RNA binding domain
253739_at	AT4G28770;AT4G28760	12	4		NC	NC	MC_I	733.8	739.9	736.85	P	P	0.000244	0.000244	934.1	1023.2	978.65	P	P	0.000244	0.000244	0.6	0.5	0.6	0.4	0.525	0.0957427	I	MI	I	NC	2	0.4	0	NC	NC	AT4G28770;AT4G28760	[AT4G28770, expressed protein];[AT4G28760, expressed protein predicted protein. Arabidopsis thaliana]
253776_at	AT4G28390	12	4		NC	NC	MC_D	1491.7	1551.1	1521.4	P	P	0.000244	0.000244	1086.4	1191.7	1139.05	P	P	0.000244	0.000244	-0.5	-0.6	-0.4	-0.4	-0.475	0.0957427	D	D	NC	D	3	0.1	0.2	NC	NC	AT4G28390	ADP, ATP carrier protein, mitochondrial, putative / ADP/ATP translocase, putative / adenine nucleotide translocator, putative similar to mitochondrial ADP,ATP carrier protein SP:P12857 from [Zea mays]
253773_s_at	AT4G28360	12	4		NC	NC	MC_I	1751.2	1729.4	1740.3	P	P	0.000244	0.000244	2425.2	2290.5	2357.85	P	P	0.000244	0.000244	0.5	0.5	0.2	0.4	0.4	0.141421	I	I	NC	I	3	-0.1	-0.2	NC	NC	AT4G28360	ribosomal protein L22 family protein
253829_at	AT4G28040	12	4		NC	NC	MC_D	2052	1696.6	1874.3	P	P	0.000244	0.000244	1117.9	1321.2	1219.55	P	P	0.000732	0.001221	-0.8	-0.7	-0.6	-0.3	-0.6	0.216025	D	D	D	NC	3	-0.2	0.2	NC	NC	AT4G28040	nodulin MtN21 family protein similar to MtN21 GI:2598575 (root nodule development) from [Medicago truncatula]
253828_at	AT4G27970	12	4		NC	NC	MC_D	558.1	518.7	538.4	P	P	0.001953	0.001221	276	284.8	280.4	P	P	0.008057	0.005859	-0.7	-1	-0.5	-1	-0.8	0.244949	D	D	NC	D	3	0.3	0.1	NC	NC	AT4G27970	C4-dicarboxylate transporter/malic acid transport family protein contains Pfam profile PF03595: C4-dicarboxylate transporter/malic acid transport protein
253835_at	AT4G27820	12	4		NC	NC	MC_I	1187.4	787	987.2	P	P	0.001221	0.00293	1505.1	1430	1467.55	P	P	0.001953	0.001953	0.3	0.6	0.3	0.5	0.425	0.15	I	I	NC	I	3	0	-0.1	NC	NC	AT4G27820	glycosyl hydrolase family 1 protein contains Pfam PF00232 : Glycosyl hydrolase family 1 domain; TIGRFAM TIGR01233: 6-phospho-beta-galactosidase; similar to hydroxyisourate hydrolase (GI:19569603) [Glycine max]
253876_at	AT4G27430	12	4		NC	NC	MC_I	772.8	886.4	829.6	P	P	0.000732	0.001221	965.5	1090.7	1028.1	P	P	0.000244	0.000732	0.4	0.4	0.4	0.2	0.35	0.1	I	I	I	NC	3	0.2	-0.1	NC	NC	AT4G27430	COP1-interacting protein 7 (CIP7) identical to COP1-Interacting Protein 7 (CIP7) GI:3327868 from [Arabidopsis thaliana]
253912_at	AT4G27340	12	4		NC	NC	MC_I	501.7	418.4	460.05	P	P	0.000244	0.000244	799.1	789.6	794.35	P	P	0.000732	0.000244	0.3	0.5	0.4	0.4	0.4	0.0816497	NC	I	I	I	1	-0.2	0.1	NC	NC	AT4G27340	Met-10+ like family protein ; contains Pfam profile PF02475: Met-10+ like-protein
253909_at	AT4G27270	12	4		NC	NC	MC_D	848.2	707	777.6	P	P	0.000244	0.000244	604.7	639.8	622.25	P	P	0.000244	0.00293	-0.6	-0.6	-0.4	-0.3	-0.475	0.15	D	D	D	NC	3	0	0.1	NC	NC	AT4G27270	quinone reductase family protein similar to 1,4-benzoquinone reductase [Phanerochaete chrysosporium][GI:4454993]; similar to Trp repressor binding protein [Escherichia coli][SP|P30849]; contains flavodoxin domain PF00258
253954_at	AT4G26970	12	4		NC	NC	MC_D	9093.9	12401	10747.5	P	P	0.000244	0.000244	7777.7	8414.3	8096	P	P	0.000244	0.000244	-0.3	-0.6	-0.1	-0.4	-0.35	0.208167	D	D	NC	D	3	0.3	0.2	NC	NC	AT4G26970	aconitate hydratase, cytoplasmic, putative / citrate hydro-lyase/aconitase, putative strong similarity to SP|P49608 Aconitate hydratase, cytoplasmic (EC 4.2.1.3) (Citrate hydro-lyase) (Aconitase) {Cucurbita maxima}; contains Pfam profiles PF00330: Aconit
253928_at	AT4G26720	12	4		NC	NC	MC_I	1020.9	1011.8	1016.35	P	P	0.001221	0.000732	1144.8	1341.7	1243.25	P	P	0.000732	0.001221	0.6	0.2	0.6	0.3	0.425	0.206155	I	NC	I	I	3	0.4	0.1	NC	NC	AT4G26720	serine/threonine protein phosphatase PP-X isozyme 1 (PPX1) identical to SP|P48529 Serine/threonine protein phosphatase PP-X isozyme 1 (EC 3.1.3.16) {Arabidopsis thaliana}; contains Pfam profile PF00149: Ser/Thr protein phosphatase
254011_at	AT4G26370	12	4		NC	NC	MC_I	1586.4	1579.6	1583	P	P	0.000244	0.000732	2304.8	2192	2248.4	P	P	0.000244	0.000732	0.4	0.4	0.5	0.4	0.425	0.05	I	I	MI	I	3	0.1	0.1	NC	NC	AT4G26370	antitermination NusB domain-containing protein contains Pfam profile: PF01029 NusB family
254004_at	AT4G26300	12	4		NC	NC	MC_I	2033.8	2052.3	2043.05	P	P	0.000732	0.000732	2808	2638.1	2723.05	P	P	0.000244	0.000244	0.3	0.3	0.2	0.2	0.25	0.057735	I	I	I	NC	3	0	-0.1	NC	NC	AT4G26300	arginyl-tRNA synthetase, putative / arginine--tRNA ligase, putative similar to SP|P37880 Arginyl-tRNA synthetase (EC 6.1.1.19) (Arginine--tRNA ligase) (ArgRS) {Cricetulus longicaudatus}; contains Pfam profiles PF00750: arginyl-tRNA synthetase, PF03485: a
254025_at	AT4G25790	12	4		NC	NC	MC_D	445	534.3	489.65	P	P	0.000732	0.000244	254.7	338.4	296.55	P	P	0.00293	0.010742	-0.6	-1.2	-0.3	-0.9	-0.75	0.387298	D	D	NC	D	3	0.3	0.2	NC	NC	AT4G25790	allergen V5/Tpx-1-related family protein similar to SP|Q40374 Pathogenesis-related protein PR-1 precursor {Medicago truncatula}; contains Pfam profile PF00188: SCP-like extracellular protein
254020_at	AT4G25700	12	4		NC	NC	MC_I	3902.4	4210.1	4056.25	P	P	0.000244	0.000732	4814.2	4645.4	4729.8	P	P	0.000244	0.000244	0.4	0.3	0.3	0.5	0.375	0.0957427	I	I	NC	I	3	0	-0.1	NC	NC	AT4G25700	beta-carotene hydroxylase identical to GI:1575296
254089_at	AT4G24800	12	4		NC	NC	MC_I	1166.1	1067	1116.55	P	P	0.000244	0.000244	1552	1496.5	1524.25	P	P	0.000244	0.000244	0.4	0.5	0.3	0.4	0.4	0.0816497	I	I	MI	I	3	0	-0.1	NC	NC	AT4G24800	MA3 domain-containing protein similar to programmed cell death 4 protein [Gallus gallus] GI:12958564; contains Pfam profile PF02847: MA3 domain
254144_at	AT4G24690	12	4		NC	NC	MC_D	5465.8	6637.6	6051.7	P	P	0.000732	0.000732	4663	5125.5	4894.25	P	P	0.000732	0.000732	-0.2	-0.4	-0.1	-0.3	-0.25	0.129099	D	D	NC	D	3	0.2	0.1	NC	NC	AT4G24690	ubiquitin-associated (UBA)/TS-N domain-containing protein / octicosapeptide/Phox/Bemp1 (PB1) domain-containing protein contains Pfam profiles PF00627: Ubiquitin-associated (UBA)/TS-N domain, PF00569: Zinc finger ZZ type domain, PF00564: PB1 domain
254161_at	AT4G24370	12	4		NC	NC	MC_D	566.9	509.7	538.3	P	P	0.000244	0.000244	437.7	462.2	449.95	P	P	0.000732	0.000732	-0.4	-0.5	-0.4	-0.4	-0.425	0.05	D	D	D	NC	3	0	0.2	NC	NC	AT4G24370	expressed protein
254148_at	AT4G24280	12	4		NC	NC	MC_I	5404.7	6298.7	5851.7	P	P	0.000732	0.000732	8600.4	7323.7	7962.05	P	P	0.000732	0.000732	0.5	0.3	0.4	0.2	0.35	0.129099	I	I	I	NC	3	0.2	0	NC	NC	AT4G24280	heat shock protein 70, putative / HSP70, putative strong similarity to heat shock protein 70 [Arabidopsis thaliana] GI:6746592; similar to heat shock 70 protein - Spinacia oleracea,PID:g2654208
254200_at	AT4G24110	12	4	D	NC		MC_D	461.9	595.5	528.7	P	P	0.001953	0.000244	335.3	321	328.15	P	P	0.00293	0.001953	-0.6	-1.4	-0.5	-1.3	-0.95	0.465475	D	D	D	D	4	0.8	0.1	I	NC	AT4G24110	expressed protein
254207_at	AT4G24060	12	4		NC	NC	MC_I	545.6	373.2	459.4	P	P	0.000244	0.001953	591.1	485.1	538.1	P	P	0.000244	0.000244	0.4	0.6	0.3	0.4	0.425	0.125831	I	I	NC	I	3	-0.1	-0.1	NC	NC	AT4G24060	Dof-type zinc finger domain-containing protein Dof zinc finger protein - Oryza sativa,PID:d1042342
254181_at	AT4G23940	12	4		NC	NC	MC_I	560.6	660.5	610.55	P	P	0.00415	0.01416	920.8	709.7	815.25	P	P	0.000732	0.000732	0.6	0.4	0.4	0.1	0.375	0.206155	I	I	I	NC	3	0.3	-0.3	NC	NC	AT4G23940	FtsH protease, putative contains similarity to zinc dependent protease GI:7650138 from [Arabidopsis thaliana]
254233_at	AT4G23800	12	4	I		NC	MC_I	687.9	559.2	623.55	P	P	0.000732	0.000732	2092.2	1558.1	1825.15	P	P	0.000244	0.000244	1.3	1.5	0.9	1.1	1.2	0.258199	I	I	I	I	4	-0.1	-0.4	NC	D	AT4G23800	high mobility group (HMG1/2) family protein similar to HMG2B [Homo sapiens] GI:32335; contains Pfam profile PF00505: HMG (high mobility group) box
254218_at	AT4G23740	12	4		NC	NC	MC_I	622	596.9	609.45	P	P	0.001221	0.001953	1070.6	989.8	1030.2	P	P	0.000244	0.000244	0.8	0.8	0.4	0.6	0.65	0.191485	I	I	I	NC	3	0	-0.4	NC	NC	AT4G23740	leucine-rich repeat transmembrane protein kinase, putative receptor-like protein kinase - Arabidopsis thaliana RKL1, PID:g4008006
254262_at	AT4G23470	12	4		NC	NC	MC_D	4933.6	5447.4	5190.5	P	P	0.000244	0.000244	4153.1	3662.3	3907.7	P	P	0.000244	0.000244	-0.4	-0.5	-0.4	-0.4	-0.425	0.05	D	D	NC	MD	2	0.1	0	NC	NC	AT4G23470	hydroxyproline-rich glycoprotein family protein contains proline-rich extensin domains, INTERPRO:IPR002965
254280_at	AT4G22756	12	4		NC	NC	MC_D	1188.8	1233.3	1211.05	P	P	0.000244	0.000244	856.4	998	927.2	P	P	0.000244	0.000244	-0.5	-0.6	-0.3	-0.4	-0.45	0.129099	D	D	NC	D	3	0.2	0.2	NC	NC	AT4G22756	sterol desaturase family protein similar to sterol 4-alpha-methyl-oxidase GI:16973471 from [Arabidopsis thaliana]; contains Pfam profile PF01598: Sterol desaturase
254314_at	AT4G22470	10	4	D		NC	MC_D	3030.1	3589.7	3309.9	P	P	0.000244	0.000244	284.8	670.2	477.5	P	P	0.030273	0.005859	-3.6	-4.2	-2.3	-2.8	-3.225	0.84212	D	D	D	D	4	0.5	1.1	NC	I	AT4G22470	protease inhibitor/seed storage/lipid transfer protein (LTP) family protein similar to hydroxyproline-rich glycoprotein DZ-HRGP from Volvox carteri f. nagariensis GP|6523547; contains Pfam profile PF00234 Protease inhibitor/seed storage/LTP family
254386_at	AT4G21960	12	4		NC	NC	MC_D	39430.4	43958.9	41694.7	P	P	0.000244	0.000244	32394.1	34851.2	33622.7	P	P	0.000244	0.000244	-0.2	-0.4	-0.1	-0.3	-0.25	0.129099	D	D	NC	MD	2	0.2	0.1	NC	NC	AT4G21960	peroxidase 42 (PER42) (P42) (PRXR1) identical to SP|Q9SB81 Peroxidase 42 precursor (EC 1.11.1.7) (Atperox P42) (PRXR1) (ATP1a/ATP1b) {Arabidopsis thaliana}
254389_s_at	AT4G21910	12	4		NC	NC	MC_D	1462.4	1508.7	1485.55	P	P	0.000244	0.000244	967.9	1162	1064.95	P	P	0.000244	0.000244	-0.7	-0.5	-0.4	-0.3	-0.475	0.170783	D	D	D	NC	3	-0.1	0.3	NC	NC	AT4G21910	MATE efflux family protein similar to ripening regulated protein DDTFR18 [Lycopersicon esculentum] GI:12231296; contains Pfam profile PF01554: Uncharacterized membrane protein family
254370_at	AT4G21750	12	4		NC	NC	MC_I	1049.4	1034.8	1042.1	P	P	0.000244	0.000244	1529.6	1730.5	1630.05	P	P	0.000244	0.000244	0.4	0.7	0.7	0.7	0.625	0.15	I	MI	I	I	3	-0.1	0.1	NC	NC	AT4G21750	L1 specific homeobox gene (ML1) / ovule-specific homeobox protein A20 nearly identical to meristem L1 layer homeobox protein A20 (AtML1) [Arabidopsis thaliana] GI:1881536, protodermal factor2 (PDF2) [Arabidopsis thaliana] GI:14276060
254429_at	AT4G21105	12	4		NC	NC	MC_D	15124.3	14221.7	14673	P	P	0.000244	0.000244	11982.9	9996	10989.5	P	P	0.000244	0.000244	-0.3	-0.2	-0.4	-0.5	-0.35	0.129099	D	NC	D	D	3	-0.1	-0.1	NC	NC	AT4G21105	expressed protein
254449_at	AT4G20910	12	4		NC	NC	MC_I	220.9	218.7	219.8	P	P	0.005859	0.01416	375.7	289.1	332.4	P	P	0.001221	0.001953	0.6	0.6	0.4	0.5	0.525	0.0957427	I	I	NC	I	3	0	-0.1	NC	NC	AT4G20910	double-stranded RNA binding protein-related / DsRBD protein-related contains weak similarity to Pfam profile PF00035: Double-stranded RNA binding motif
254574_at	AT4G19430	12	4	D		NC	MC_D	2553.2	1524.3	2038.75	P	P	0.000732	0.001221	629.4	816.7	723.05	P	P	0.000244	0.000244	-1.8	-1.5	-1.1	-0.7	-1.275	0.478714	D	D	D	D	4	-0.4	0.7	NC	I	AT4G19430	expressed protein
254615_at	AT4G19210	12	4		NC	NC	MC_I	3958.5	4191.2	4074.85	P	P	0.000244	0.000244	4880.3	4987.4	4933.85	P	P	0.000244	0.000244	0.4	0.2	0.3	0.2	0.275	0.0957427	I	MI	I	NC	2	0.2	0	NC	NC	AT4G19210	RNase L inhibitor protein, putative similar to 68 kDa protein HP68 GI:16755057 from [Triticum aestivum]
254559_at	AT4G19200	12	4		NC	NC	MC_D	2281	1997	2139	P	P	0.000244	0.000244	1614.1	1791.3	1702.7	P	P	0.000244	0.001953	-0.4	-0.4	-0.5	-0.4	-0.425	0.05	D	NC	D	D	3	-0.1	-0.1	NC	NC	AT4G19200	proline-rich family protein contains proline rich extensin domains, INTERPRO:IPR002965
254612_at	AT4G19100	12	4		NC	NC	MC_I	1355.4	1078.6	1217	P	P	0.000244	0.000244	1686.7	1572.1	1629.4	P	P	0.000244	0.000244	0.3	0.6	0.5	0.7	0.525	0.170783	NC	I	I	I	1	-0.3	0.1	NC	NC	AT4G19100	expressed protein
254673_at	AT4G18430	12	4		NC	NC	MC_D	939	926.9	932.95	P	P	0.000244	0.000244	573.1	575.5	574.3	P	P	0.000244	0.000732	-0.7	-0.4	-0.5	-0.3	-0.475	0.170783	D	MD	D	NC	2	-0.2	0.3	NC	NC	AT4G18430	Ras-related GTP-binding protein, putative similar to GTP-binding protein GI:303742 from [Pisum sativum]
254670_at	AT4G18390	12	4		NC	NC	MC_I	899.7	624	761.85	P	P	0.000244	0.000244	1065	871.1	968.05	P	P	0.000244	0.000244	0.4	0.5	0.4	0.4	0.425	0.05	I	I	NC	I	3	0	0	NC	NC	AT4G18390	TCP family transcription factor, putative similar to TFPD (GI:6681577) [Arabidopsis thaliana]; teosinte branched1 protein - Zea mays, PIR2:T04347
254667_at	AT4G18280	11	4		NC	NC	MC_D	385.4	408.7	397.05	P	P	0.001953	0.001221	277.2	311.4	294.3	P	P	0.008057	0.023926	-0.4	-0.4	-0.4	-0.2	-0.35	0.1	D	D	NC	D	3	0	0.1	NC	NC	AT4G18280	glycine-rich cell wall protein-related glycine-rich protein 1.0 precursor, Phaseolus vulgaris, PIR1:S01821
254659_at	AT4G18240	12	4		NC	NC	MC_I	1459.5	1520.7	1490.1	P	P	0.000244	0.000244	2179.1	1805.2	1992.15	P	P	0.000244	0.000244	0.5	0.5	0.2	0.3	0.375	0.15	I	I	NC	I	3	0.1	-0.2	NC	NC	AT4G18240	starch synthase-related protein contains similarity to starch synthase GI:4582783 from [Vigna unguiculata]
245399_at	AT4G17340	12	4		NC	NC	MC_I	3654.7	2655.1	3154.9	P	P	0.000244	0.000244	4478.6	3965.5	4222.05	P	P	0.000244	0.000244	0.2	0.5	0.1	0.4	0.3	0.182574	I	I	NC	I	3	-0.3	-0.1	NC	NC	AT4G17340	major intrinsic family protein / MIP family protein contains Pfam profile: MIP PF00230
245413_at	AT4G17300	12	4		NC	NC	MC_I	612.4	520.4	566.4	P	P	0.001953	0.001953	683.1	641.5	662.3	P	P	0.001953	0.000732	0.5	0.4	0.8	0.4	0.525	0.189297	I	NC	I	I	3	0.1	0.2	NC	NC	AT4G17300	asparaginyl-tRNA synthetase, chloroplast, mitochondrial / asparagine-tRNA ligase / AsnRS (SYNO) nearly identical to SP|O48593
245324_at	AT4G17260	12	4		NC	NC	MC_D	1490.4	1754.5	1622.45	P	P	0.000244	0.000244	1259	1261.2	1260.1	P	P	0.000244	0.000244	-0.3	-0.7	-0.2	-0.5	-0.425	0.221736	D	D	NC	D	3	0.3	0.1	NC	NC	AT4G17260	L-lactate dehydrogenase, putative strong similarity to L-lactate dehydrogenase from Lycopersicon esculentum (GI:1620970, GI:1620972), Hordeum vulgare (SP|P22988, SP|P22989); contains InterPro entry IPR001236: Lactate/malate dehydrogenase
245266_at	AT4G17070	12	4	D	NC		MC_D	1212.8	1738.4	1475.6	P	P	0.000244	0.000244	831	1004.1	917.55	P	P	0.01416	0.000244	-0.4	-0.8	-0.6	-0.8	-0.65	0.191485	D	D	D	D	4	0.3	-0.1	I	NC	AT4G17070	expressed protein
245400_at	AT4G17040	12	4		NC	NC	MC_I	7014.6	8710.5	7862.55	P	P	0.000244	0.000244	10710.4	10436	10573.2	P	P	0.000244	0.000244	0.5	0.3	0.4	0.2	0.35	0.129099	I	I	I	NC	3	0.2	-0.1	NC	NC	AT4G17040	ATP-dependent Clp protease proteolytic subunit, putative similar to ATP-dependent Clp protease proteolytic subunit GI:7264063 from [Synechococcus sp.PCC 7942]
245349_at	AT4G16690	12	4		NC	NC	MC_I	1157.7	1178.1	1167.9	P	P	0.000244	0.000244	1500.8	1478.6	1489.7	P	P	0.000244	0.000244	0.4	0.3	0.5	0.3	0.375	0.0957427	I	NC	I	I	3	0.1	0	NC	NC	AT4G16690	esterase/lipase/thioesterase family protein similar to ethylene-induced esterase [Citrus sinensis] GI:14279437, polyneuridine aldehyde esterase [Rauvolfia serpentina] GI:6651393, SP|Q40708 PIR7A protein {Oryza sativa}; contains Interpro entry IPR000379
245262_at	AT4G16563	12	4	D	NC		MC_D	842.1	1159.2	1000.65	P	P	0.000244	0.000244	327.4	414.4	370.9	P	P	0.001221	0.001953	-1.4	-1.9	-1.2	-1.5	-1.5	0.294392	D	D	D	D	4	0.5	0.3	I	NC	AT4G16563	aspartyl protease family protein contains Pfam profile: PF00026 eukaryotic aspartyl protease
245290_at	AT4G16490	12	4		NC	NC	MC_D	1824.7	1198.7	1511.7	P	P	0.000732	0.001221	1209.4	1683	1446.2	P	P	0.000732	0.000732	-0.5	-0.3	-0.3	-0.1	-0.3	0.163299	D	D	D	NC	3	-0.2	0.2	NC	NC	AT4G16490	armadillo/beta-catenin repeat family protein contains Pfam profile: PF00514 armadillo/beta-catenin-like repeat
245291_at	AT4G16155	12	4		NC	NC	MC_I	2425.9	2512.3	2469.1	P	P	0.001221	0.001221	2962.2	2945.7	2953.95	P	P	0.000244	0.001221	0.5	0.6	0.4	0.4	0.475	0.0957427	I	I	I	NC	3	0.1	0	NC	NC	AT4G16155	dihydrolipoamide dehydrogenase 2, plastidic / lipoamide dehydrogenase 2 (PTLPD2) identical to plastidic lipoamide dehydrogenase from Arabidopsis thaliana [gi:7159284]
245521_at	AT4G15880	12	4		NC	NC	MC_I	472.2	444.8	458.5	P	P	0.000732	0.000244	624.8	688.7	656.75	P	P	0.000732	0.000244	0.3	0.3	0.5	0.6	0.425	0.15	I	NC	I	I	3	-0.1	0.1	NC	NC	AT4G15880	Ulp1 protease family protein contains Pfam profile PF02902: Ulp1 protease family, C-terminal catalytic domain; low similarity to sentrin/SUMO-specific protease [Homo sapiens] GI:6906859; identical to cDNA hypothetical protein, partial (1189 bp) GI:232634
245529_at	AT4G15570	12	4		NC	NC	MC_I	197.8	210.7	204.25	P	P	0.008057	0.008057	428.2	281	354.6	P	P	0.000732	0.001221	1	0.6	0.8	0.4	0.7	0.258199	I	I	I	NC	3	0.3	-0.4	NC	NC	AT4G15570	tRNA-splicing endonuclease positive effector-related contains similarity to SEN1, a positive effector of tRNA-splicing endonuclease [Saccharomyces cerevisiae] gi|172574|gb|AAB63976
245532_at	AT4G15110	12	4		NC	NC	MC_I	2055.9	2297.6	2176.75	P	P	0.000244	0.000244	2822.8	2609.1	2715.95	P	P	0.000244	0.000244	0.4	0.2	0.4	0.3	0.325	0.0957427	I	I	I	NC	3	0.2	0	NC	NC	AT4G15110	cytochrome P450 97B3, putative (CYP97B3) identical to Cytochrome P450 97B3 (SP:O23365) [Arabidopsis thaliana]
245569_at	AT4G14660	12	4		NC	NC	MC_I	351.6	374.5	363.05	P	P	0.005859	0.030273	617.1	478.3	547.7	P	P	0.001221	0.005859	0.3	0.8	0.5	0.6	0.55	0.208167	MI	I	I	I	1	-0.2	-0.3	NC	NC	AT4G14660	RNA polymerase Rpb7 N-terminal domain-containing protein similar to SP|P52433 DNA-directed RNA polymerase II 19 kDa polypeptide (EC 2.7.7.6) (RPB7) {Rattus norvegicus}; contains Pfam profile PF03876: RNA polymerase Rpb7, N-terminal domain
245333_at	AT4G14615	12	4		NC	NC	MC_D	4325	3396.1	3860.55	P	P	0.000244	0.000244	2673	2712.7	2692.85	P	P	0.000244	0.000244	-0.4	-0.4	-0.5	-0.4	-0.425	0.05	D	MD	D	D	3	0	-0.1	NC	NC	AT4G14615	expressed protein
245612_at	AT4G14440	12	4		NC	NC	MC_D	2405.5	2932.7	2669.1	P	P	0.000244	0.000244	1812	2063.7	1937.85	P	P	0.000244	0.000244	-0.3	-0.7	-0.2	-0.7	-0.475	0.262996	D	D	MD	D	3	0.3	0	NC	NC	AT4G14440	enoyl-CoA hydratase/isomerase family protein low similarity to PhaB [Pseudomonas putida] GI:3253198, SP|P31551 Carnitine racemase {Escherichia coli}; contains Pfam profile PF00378 enoyl-CoA hydratase/isomerase family protein
254687_at	AT4G13770	12	4		NC	NC	MC_D	13337.9	14694.6	14016.2	P	P	0.000244	0.000244	9833.3	11710	10771.6	P	P	0.000244	0.000244	-0.3	-0.4	-0.3	-0.3	-0.325	0.05	D	D	MD	D	3	0.1	0.2	NC	NC	AT4G13770	cytochrome P450 family protein
254723_at	AT4G13510	12	4		NC	NC	MC_D	3462.5	3311.5	3387	P	P	0.000244	0.000244	2763.2	2779.5	2771.35	P	P	0.000244	0.000244	-0.4	-0.4	-0.4	-0.4	-0.4	0	D	D	D	NC	3	0	0	NC	NC	AT4G13510	ammonium transporter 1, member 1 (AMT1.1) identical to SP|P54144 High affinity ammonium transporter (AtAMT1;1) {Arabidopsis thaliana}
254742_at	AT4G13430	12	4		NC	NC	MC_D	17442.1	20348	18895	P	P	0.000244	0.000244	15201.7	16075.2	15638.5	P	P	0.000244	0.000244	-0.2	-0.4	-0.2	-0.4	-0.3	0.11547	D	D	NC	D	3	0.2	0	NC	NC	AT4G13430	aconitase family protein / aconitate hydratase family protein contains Pfam profile PF00330: Aconitase family (aconitate hydratase
254773_at	AT4G13410	12	4		NC	NC	MC_D	366	418.6	392.3	P	P	0.000244	0.000244	285.8	139.9	212.85	P	P	0.000244	0.01416	-0.5	-0.2	-0.5	-0.4	-0.4	0.141421	NC	D	D	D	1	0.2	-0.1	NC	NC	AT4G13410	glycosyl transferase family 2 protein similar to beta-(1-3)-glucosyl transferase GB:AAC62210 GI:3687658 from [Bradyrhizobium japonicum], cellulose synthase from Agrobacterium tumeficiens [gi:710492] and Agrobacterium radiobacter [gi:710493]; contains Pfa
254788_at	AT4G12790	12	4		NC	NC	MC_I	1518.6	1458.5	1488.55	P	P	0.000244	0.000244	2080.8	1963.7	2022.25	P	P	0.000244	0.000244	0.4	0.6	0.3	0.6	0.475	0.15	I	I	MI	I	3	-0.1	0	NC	NC	AT4G12790	ATP-binding family protein contains Pfam domain, PF03029: Conserved hypothetical ATP binding protein
254828_at	AT4G12550	12	4	D		NC	MC_D	8030.8	9145.3	8588.05	P	P	0.000244	0.000244	3038	4073.2	3555.6	P	P	0.000244	0.000732	-1.3	-1.4	-1.1	-1.2	-1.25	0.129099	D	D	D	D	4	0.2	0.3	NC	I	AT4G12550	protease inhibitor/seed storage/lipid transfer protein (LTP) family protein similar to pEARLI 1 (Accession No. L43080): an Arabidopsis member of a conserved gene family (PGF95-099), Plant Physiol. 109 (4), 1497 (1995); contains Pfam protease inhibitor/se
254819_at	AT4G12500	12	4	D	NC		MC_D	4738.8	7711.5	6225.15	P	P	0.000244	0.000244	1418.2	1409.4	1413.8	P	P	0.000732	0.000244	-1.6	-2.3	-1.5	-2.1	-1.875	0.386221	D	D	D	D	4	0.7	-0.1	I	NC	AT4G12500	protease inhibitor/seed storage/lipid transfer protein (LTP) family protein similar to pEARLI 1 (Accession No. L43080): an Arabidopsis member of a conserved gene family (PGF95-099), Plant Physiol. 109 (4), 1497 (1995); contains Pfam protease inhibitor/se
254805_at	AT4G12480	12	4	D	NC		MC_D	25418.8	31238	28328.4	P	P	0.000244	0.000244	9188.4	8394.1	8791.25	P	P	0.000244	0.000244	-1.5	-1.8	-1.4	-1.7	-1.6	0.182574	D	D	D	D	4	0.3	0	I	NC	AT4G12480	protease inhibitor/seed storage/lipid transfer protein (LTP) family protein identical to pEARLI 1 (Accession No. L43080): an Arabidopsis member of a conserved gene family (PGF95-099), Plant Physiol. 109 (4), 1497 (1995); contains Pfam protease inhibitor/
254818_at	AT4G12470	12	4	D	NC		MC_D	29518.7	38114	33816.3	P	P	0.000244	0.000244	8448	9524.6	8986.3	P	P	0.000244	0.000244	-1.8	-2.1	-1.6	-2.2	-1.925	0.275379	D	D	D	D	4	0.4	0.2	I	NC	AT4G12470	protease inhibitor/seed storage/lipid transfer protein (LTP) family protein similar to pEARLI 1 (Accession No. L43080): an Arabidopsis member of a conserved gene family (PGF95-099), Plant Physiol. 109 (4), 1497 (1995); contains Pfam protease inhibitor/se
254815_at	AT4G12420	12	4		NC	NC	MC_I	4221.4	5115.5	4668.45	P	P	0.000244	0.000244	7478.1	6461.1	6969.6	P	P	0.000244	0.000244	0.5	0.6	0.3	0.4	0.45	0.129099	I	I	NC	I	3	-0.1	-0.3	NC	NC	AT4G12420	multi-copper oxidase, putative (SKU5) identical to multi-copper oxidase-related protein (SKU5)(GI:18158154) [Arabidopsis thaliana]; similar to pollen-specific protein precursor - common tobacco, PIR2:S22495; contains Pfam profile: PF00394 Multicopper oxi
254926_at	AT4G11280	12	4	I		NC	MC_I	756.4	815.5	785.95	P	P	0.000244	0.000244	2023	1522.9	1772.95	P	P	0.000244	0.000244	1.4	1.5	1	1	1.225	0.262996	I	I	I	I	4	0	-0.5	NC	D	AT4G11280	1-aminocyclopropane-1-carboxylate synthase 6 / ACC synthase 6 (ACS6) identical to GI:3746125
255053_at	AT4G09730	12	4		NC	NC	MC_I	1123.3	1049	1086.15	P	P	0.001953	0.001953	1348.3	1325.5	1336.9	P	P	0.001953	0.001953	0.5	0.3	0.3	0.2	0.325	0.125831	I	I	I	NC	3	0.2	-0.2	NC	NC	AT4G09730	DEAD/DEAH box helicase, putative RNA helicase -Mus musculus,PIR2:I84741
255070_at	AT4G09020	12	4		NC	NC	MC_D	1122.7	1255.5	1189.1	P	P	0.000244	0.000244	831.5	888.5	860	P	P	0.000244	0.000244	-0.4	-0.6	-0.5	-0.6	-0.525	0.0957427	D	D	NC	D	3	0.3	0.1	NC	NC	AT4G09020	isoamylase, putative / starch debranching enzyme, putative similar to isoamylase isoform 3 [Solanum tuberosum] GI:27728149, isoamylase [Oryza sativa] GI:3252794; contains Pfam profiles PF00128: Alpha amylase catalytic domain, PF02922: Isoamylase N-termin
255078_at	AT4G09010	12	4		NC	NC	MC_I	4843.9	5691.5	5267.7	P	P	0.001953	0.00293	7073.1	6557.2	6815.15	P	P	0.001953	0.001953	0.5	0.4	0.4	0.3	0.4	0.0816497	I	I	I	NC	3	0.1	-0.2	NC	NC	AT4G09010	L-ascorbate peroxidase, chloroplast, putative identical to SP|P82281|TL29_ARATH (EC 1.11.1.11) {Arabidopsis thaliana}; ascorbate peroxidase - Spinacia oleracea, (gi:1669585); contains Pfam domain PF00141: Peroxidase; contains TIGRfam domain TIGR01409: Ta
255068_at	AT4G08920	12	4		NC	NC	MC_I	774.7	772.4	773.55	P	P	0.000732	0.001221	1060.5	1036.6	1048.55	P	P	0.000732	0.001221	0.4	0.4	0.4	0.4	0.4	0	I	I	NC	I	3	0	-0.1	NC	NC	AT4G08920	cryptochrome 1 apoprotein (CRY1) / flavin-type blue-light photoreceptor (HY4) contains Pfam PF03441: FAD binding domain of DNA photolyase; member of Pfam PF00875: deoxyribodipyrimidine photolyase superfamily; 99% identical to Cryptochrome 1 apoprotein (B
255065_s_at	AT4G08870	12	4		NC	NC	MC_D	2562.4	2847.6	2705	P	P	0.000244	0.000244	2123.2	2199.3	2161.25	P	P	0.000244	0.000244	-0.3	-0.2	-0.3	-0.2	-0.25	0.057735	D	NC	D	MD	2	-0.1	0.1	NC	NC	AT4G08870	arginase, putative similar to Swiss-Prot:P46637 arginase (EC 3.5.3.1) [Arabidopsis thaliana]
255116_at	AT4G08850	12	4	D	NC		MC_D	1998.9	2688.1	2343.5	P	P	0.000244	0.000244	1541.2	1304.8	1423	P	P	0.000244	0.000244	-0.3	-0.8	-0.6	-1.1	-0.7	0.33665	D	D	D	D	4	0.5	-0.3	I	NC	AT4G08850	leucine-rich repeat family protein / protein kinase family protein contains Pfam domains PF00560: Leucine Rich Repeat and PF00069: Protein kinase domain
255129_at	AT4G08290	12	4		NC	NC	MC_D	741.4	744	742.7	P	P	0.000244	0.000244	547	569.1	558.05	P	P	0.000244	0.000244	-0.6	-0.9	-0.5	-0.5	-0.625	0.189297	D	D	D	NC	3	0.1	0.1	NC	NC	AT4G08290	nodulin MtN21 family protein similar to MtN21 GI:2598575 (root nodule development) from [Medicago truncatula]
255225_at	AT4G05410	12	4		NC	NC	MC_I	905.5	1091.7	998.6	P	P	0.00415	0.001953	1283.7	1242.1	1262.9	P	P	0.001221	0.001953	0.4	0.3	0.4	0.2	0.325	0.0957427	I	I	I	NC	3	0.2	-0.1	NC	NC	AT4G05410	transducin family protein / WD-40 repeat family protein contains 6 WD-40 repeats (PF00400); U3 snoRNP-associated 55-kDa protein, Homo sapiens, gb:NP_004695; Vegetatible incompatibility protein HET-E-1 (SP:Q00808) [Podospora anserina]
255220_at	AT4G05320	12	4		NC	NC	MC_D	21861.1	21630.2	21745.7	P	P	0.000244	0.000244	17668.5	17010.2	17339.3	P	P	0.000244	0.000244	-0.3	-0.3	-0.3	-0.4	-0.325	0.05	D	NC	D	D	3	0	0	NC	NC	AT4G05320	polyubiquitin (UBQ10) (SEN3) senescence-associated protein; identical to GI:870791
255255_at	AT4G05070	12	4		NC	NC	MC_I	2298.3	2167.2	2232.75	P	P	0.000244	0.000244	2753.3	3199.6	2976.45	P	P	0.000244	0.000244	0.2	0.3	0.4	0.5	0.35	0.129099	NC	MI	I	I	1	-0.3	0.1	NC	NC	AT4G05070	expressed protein
255304_at	AT4G04850	12	4		NC	NC	MC_I	479.7	446.1	462.9	P	P	0.000244	0.000732	638.2	698.5	668.35	P	P	0.000244	0.000244	0.3	0.5	0.4	0.5	0.425	0.0957427	MI	NC	I	I	1	-0.1	-0.1	NC	NC	AT4G04850	K+ efflux antiporter, putative (KEA3) similar to A. thaliana K+ antiporter KEA1, GenBank accession number AF003382; Monovalent cation:proton antiporter family 2 (CPA2 family) member, PMID:11500563
255298_at	AT4G04840	12	4	I	NC		MC_I	912.2	610.3	761.25	P	P	0.000732	0.001953	1538.3	1617	1577.65	P	P	0.000732	0.000732	0.6	1	0.7	1.2	0.875	0.275379	I	I	I	I	4	-0.5	0.1	D	NC	AT4G04840	methionine sulfoxide reductase domain-containing protein / SeIR domain-containing protein low similarity to pilin-like transcription factor [Homo sapiens] GI:5059062; contains Pfam profile PF01641: SelR domain
255301_at	AT4G04800	12	4		NC	NC	MC_D	908.6	853.5	881.05	P	P	0.001221	0.001221	691	679.4	685.2	P	P	0.001221	0.000732	-0.5	-0.3	-0.3	-0.2	-0.325	0.125831	D	D	MD	NC	2	0	0.1	NC	NC	AT4G04800	methionine sulfoxide reductase domain-containing protein / SeIR domain-containing protein low similarity to pilin-like transcription factor [Homo sapiens] GI:5059062, SP|P14930 Peptide methionine sulfoxide reductase msrA/msrB (EC 1.8.4.6) {Neisseria gono
255381_at	AT4G03510	12	4		NC	NC	MC_I	1281.1	1056.9	1169	P	P	0.000244	0.000244	1594.3	1549.3	1571.8	P	P	0.000244	0.000244	0.4	0.6	0.3	0.5	0.45	0.129099	I	I	NC	I	3	-0.3	0	NC	NC	AT4G03510	zinc finger (C3HC4-type RING finger) family protein (RMA1) identical to RING zinc finger protein RMA1 gi:3164222
255403_at	AT4G03400	12	4		NC	NC	MC_I	477.8	463	470.4	P	P	0.000244	0.000732	690.8	605.6	648.2	P	P	0.000244	0.000244	0.3	0.5	0.3	0.5	0.4	0.11547	NC	I	I	I	1	-0.1	0.1	NC	NC	AT4G03400	auxin-responsive GH3 family protein similar to auxin-responsive GH3 product [Glycine max] GI:18591; contains Pfam profile PF03321: GH3 auxin-responsive promoter
255456_at	AT4G02920	12	4		NC	NC	MC_I	4810.1	3475.5	4142.8	P	P	0.000244	0.000244	5244.8	5547.7	5396.25	P	P	0.000244	0.000244	0.3	0.6	0.3	0.5	0.425	0.15	I	I	NC	I	3	-0.2	0	NC	NC	AT4G02920	expressed protein
255447_at	AT4G02790	12	4		NC	NC	MC_I	593.5	758.5	676	P	P	0.001953	0.001953	763	801.5	782.25	P	P	0.001221	0.001953	0.6	0.6	0.6	0.5	0.575	0.05	I	I	I	NC	3	0.2	0	NC	NC	AT4G02790	GTP-binding family protein contains Pfam domain, PF01926: GTPase of unknown function
255516_at	AT4G02270	12	4	D	NC		MC_D	3514	2667.7	3090.85	P	P	0.000244	0.000244	2047.9	1936.5	1992.2	P	P	0.000244	0.000244	-1.1	-0.7	-1.3	-0.8	-0.975	0.275379	D	D	D	D	4	-0.4	-0.1	D	NC	AT4G02270	pollen Ole e 1 allergen and extensin family protein contains Pfam domain, PF01190: Pollen proteins Ole e I family
255554_at	AT4G01897	12	4		NC	NC	MC_D	984.6	804.3	894.45	P	P	0.000732	0.005859	548.5	519	533.75	P	P	0.001953	0.001953	-0.7	-0.6	-0.7	-0.4	-0.6	0.141421	D	MD	D	NC	2	-0.3	0.3	NC	NC	AT4G01897	expressed protein
255540_at	AT4G01800	12	4		NC	NC	MC_I	1642.6	1486.1	1564.35	P	P	0.000244	0.000244	2414	1842.4	2128.2	P	P	0.000244	0.000244	0.5	0.4	0.4	0.3	0.4	0.0816497	I	I	MI	NC	2	0	-0.1	NC	NC	AT4G01800	preprotein translocase secA subunit, putative similar to preprotein translocase secA subunit, chloroplast [precursor] SP:Q9SYI0 from [Arabidopsis thaliana]; non-consensus GA donor splice site at exon 4
255564_s_at	AT4G01770;AT4G01750	12	4		NC	NC	MC_D	203.1	184.6	193.85	P	P	0.001953	0.00415	138.5	74.6	106.55	P	P	0.005859	0.046143	-0.6	-0.5	-1.2	-0.9	-0.8	0.316228	D	D	NC	MD	2	0	-0.6	NC	NC	AT4G01770;AT4G01750	[AT4G01770, hypothetical protein similar to T15B16.9];[AT4G01750, expressed protein T15B16.8]
255595_at	AT4G01700	12	4	D	NC		MC_D	800.4	1016.6	908.5	P	P	0.000244	0.000244	500.2	539.4	519.8	P	P	0.000732	0.00293	-0.8	-1	-0.6	-0.9	-0.825	0.170783	D	D	D	D	4	0.4	0.1	I	NC	AT4G01700	chitinase, putative similar to peanut type II chitinase GI:1237025 from [Arachis hypogaea]
255604_at	AT4G01080	12	4	D	NC		MC_D	668.1	926.1	797.1	P	P	0.000732	0.000244	443.5	484.6	464.05	P	P	0.000732	0.001221	-0.6	-1	-0.4	-1	-0.75	0.3	D	D	D	D	4	0.4	0.2	I	NC	AT4G01080	expressed protein
255652_at	AT4G00950	12	4		NC	NC	MC_I	196.2	242.7	219.45	P	P	0.010742	0.037598	503	321.3	412.15	P	P	0.001953	0.00293	1	1	0.6	0.6	0.8	0.23094	I	I	NC	I	3	0	-0.1	NC	NC	AT4G00950	expressed protein
255685_s_at	AT4G00620;AT4G00600	12	4		NC	NC	MC_I	1015.1	1084.3	1049.7	P	P	0.001221	0.000244	1348.2	1427.8	1388	P	P	0.001953	0.000732	0.6	0.5	0.5	0.4	0.5	0.0816497	I	I	I	MI	3	0.2	-0.1	NC	NC	AT4G00620;AT4G00600	[AT4G00620, tetrahydrofolate dehydrogenase/cyclohydrolase, putative similar to SP|P07245 C-1-tetrahydrofolate synthase, cytoplasmic (C1-THF synthase) [Includes: Methylenetetrahydrofolate dehydrogenase (EC 1.5.1.5); Methenyltetrahydrofolate cyclohydrolase
255675_at	AT4G00480	12	4		NC	NC	MC_I	277	261.3	269.15	P	P	0.000244	0.001953	392.7	392.2	392.45	P	P	0.000244	0.000244	0.7	0.6	0.6	0.6	0.625	0.05	I	I	I	MI	3	0.1	-0.2	NC	NC	AT4G00480	myc-related transcription factor (MYC1) identical to ATMYC1 GI:1853965 from [Arabidopsis thaliana]
255714_at	AT4G00300	12	4		NC	NC	MC_D	2623.6	2921.7	2772.65	P	P	0.000244	0.000244	2301.8	2240	2270.9	P	P	0.000244	0.000244	-0.2	-0.4	-0.3	-0.6	-0.375	0.170783	D	D	MD	D	3	0.2	-0.1	NC	NC	AT4G00300	fringe-related protein + weak similarity to Fringe [Schistocerca gregaria](GI:6573138);Fringe encodes an extracellular protein that regulates Notch signalling.
251119_at	AT3G63510	12	4		NC	NC	MC_I	494.1	596.8	545.45	P	P	0.001953	0.001953	824.1	599	711.55	P	P	0.000244	0.000244	0.6	0.4	0.5	0.3	0.45	0.129099	I	MI	I	MI	2	0.1	-0.1	NC	NC	AT3G63510	nitrogen regulation family protein contains Pfam domain PF01207: Dihydrouridine synthase (Dus); similar to (SP:P45672) NIFR3-like protein (SP:P45672) [Azospirillum brasilense]
251205_at	AT3G63080	12	4		NC	NC	MC_D	2293.3	2233.1	2263.2	P	P	0.000244	0.000244	1734	1724.8	1729.4	P	P	0.000244	0.000244	-0.4	-0.4	-0.4	-0.4	-0.4	0	D	D	D	NC	3	-0.1	0.1	NC	NC	AT3G63080	glutathione peroxidase, putative phospholipid-hydroperoxide glutathione peroxidase, spinach, PIR:JC5619
251226_at	AT3G62680	12	4	D		NC	MC_D	1203.5	1240.7	1222.1	P	P	0.001953	0.001953	926.1	621.6	773.85	P	P	0.001953	0.001953	-0.4	-0.5	-0.9	-1	-0.7	0.294392	D	D	D	D	4	0.2	-0.4	NC	D	AT3G62680	proline-rich family protein contains proline-rich region, INTERPRO:IPR000694
251189_at	AT3G62650	12	4		NC	NC	MC_D	3992.6	4781.1	4386.85	P	P	0.000244	0.000244	3130.2	2946.5	3038.35	P	P	0.000244	0.000244	-0.4	-0.5	-0.3	-0.5	-0.425	0.0957427	D	D	D	MD	3	0.1	0.1	NC	NC	AT3G62650	expressed protein putative mitochondrial carrier protein At2g47490 - Arabidopsis thaliana, EMBL:AC002535
251265_at	AT3G62310	12	4		NC	NC	MC_I	1142.4	1214.7	1178.55	P	P	0.000244	0.000244	1664.3	1532.3	1598.3	P	P	0.000244	0.000244	0.5	0.4	0.5	0.3	0.425	0.0957427	I	I	I	NC	3	0.1	-0.2	NC	NC	AT3G62310	RNA helicase, putative similar to SP|P53131 Pre-mRNA splicing factor RNA helicase PRP43 (Helicase JA1) {Saccharomyces cerevisiae}; contains Pfam profiles PF04408: Helicase associated domain (HA2), PF00271: Helicase conserved C-terminal domain
251278_at	AT3G61780	11	4		NC	NC	MC_I	335.9	360	347.95	P	P	0.030273	0.023926	506.8	447.9	477.35	P	P	0.008057	0.01416	0.7	0.3	0.4	0.3	0.425	0.189297	I	I	I	NC	3	0.2	-0.2	NC	NC	AT3G61780	expressed protein ; expression supported by MPSS
251322_at	AT3G61440	12	4		NC	NC	MC_D	27060.2	29770.5	28415.3	P	P	0.000244	0.000244	23171.8	21894.7	22533.2	P	P	0.000244	0.000244	-0.2	-0.4	-0.3	-0.3	-0.3	0.0816497	D	D	NC	D	3	0.1	0	NC	NC	AT3G61440	cysteine synthase, putative / O-acetylserine (thiol)-lyase, putative / O-acetylserine sulfhydrylase, putative identical to cysteine synthase (EC 4.2.99.8) [Arabidopsis thaliana] GI:5824334; contains Pfam profile PF00291: Pyridoxal-phosphate dependent enz
251414_at	AT3G60370	12	4		NC	NC	MC_I	1485.9	1298.9	1392.4	P	P	0.000732	0.00293	2115.6	1520.2	1817.9	P	P	0.000244	0.000732	0.6	0.6	0.3	0.4	0.475	0.15	I	I	NC	I	3	-0.1	-0.3	NC	NC	AT3G60370	immunophilin / FKBP-type peptidyl-prolyl cis-trans isomerase family protein SP:Q9M222; similar to FKBP-type peptidyl-prolyl cis-trans isomerase fkpA precursor (PPiase) (Rotamase)(SP:Q8X880) [Escherichia coli O157:H7] ; contains Pfam PF00254: peptidyl-pro
251371_at	AT3G60360	12	4		NC	NC	MC_I	869.9	617.7	743.8	P	P	0.000732	0.000732	1103.5	839.9	971.7	P	P	0.000244	0.000244	0.5	0.5	0.3	0.3	0.4	0.11547	I	I	NC	I	3	-0.1	-0.2	NC	NC	AT3G60360	expressed protein
251426_at	AT3G60180	12	4		NC	NC	MC_D	1044.4	697.5	870.95	P	P	0.000244	0.000244	714.7	645.6	680.15	P	P	0.000244	0.001221	-0.7	-0.4	-0.6	-0.3	-0.5	0.182574	D	D	D	NC	3	-0.3	0	NC	NC	AT3G60180	uridylate kinase, putative / uridine monophosphate kinase, putative / UMP kinase, putative similar to uridylate kinase (EC 2.7.4.-) (UK) (Uridine monophosphate kinase) (UMP kinase) (UMP/CMP kinase) (Swiss-Prot:O04905) [Arabidopsis thaliana]
251443_at	AT3G59950;AT3G59940	12	4		NC	NC	MC_I	4558.6	4550.3	4554.45	P	P	0.000244	0.000244	5328	5857.2	5592.6	P	P	0.000244	0.000244	0.2	0.2	0.3	0.3	0.25	0.057735	NC	I	I	I	1	0	0.1	NC	NC	AT3G59950;AT3G59940	[AT3G59950, autophagy 4b (APG4b) identical to autophagy 4b [Arabidopsis thaliana] gi|19912145|dbj|BAB88384];[AT3G59940, kelch repeat-containing F-box family protein contains Pfam profiles PF01344: Kelch motif, PF00646: F-box domain]
251497_at	AT3G59060	12	4		NC	NC	MC_I	921.8	1317.8	1119.8	P	P	0.000244	0.000244	1447.9	1439.3	1443.6	P	P	0.000244	0.000244	0.6	0.2	0.6	0.3	0.425	0.206155	I	NC	I	I	3	0.3	0.1	NC	NC	AT3G59060	basic helix-loop-helix (bHLH) family protein contains Pfam profile: PF00010 helix-loop-helix DNA-binding domain
251524_at	AT3G58990	12	4		NC	NC	MC_D	5008.8	5167.9	5088.35	P	P	0.000244	0.000244	3142.8	4293.6	3718.2	P	P	0.000244	0.000244	-0.6	-0.7	-0.3	-0.4	-0.5	0.182574	D	D	D	MD	3	0	0.3	NC	NC	AT3G58990	aconitase C-terminal domain-containing protein contains Pfam profile PF00694: Aconitase C-terminal domain
251605_at	AT3G57830	12	4		NC	NC	MC_I	257.9	281.3	269.6	P	P	0.046143	0.01416	340.6	327.6	334.1	P	P	0.001221	0.008057	0.4	0.5	0.5	0.9	0.575	0.221736	I	I	I	NC	3	0	0	NC	NC	AT3G57830	leucine-rich repeat transmembrane protein kinase, putative several receptor-like protein kinases
246345_at	AT3G56760	12	4		NC	NC	MC_I	540	553.9	546.95	P	P	0.01416	0.00415	1036.6	842.5	939.55	P	P	0.001953	0.010742	0.5	0.9	0.5	0.6	0.625	0.189297	I	I	I	NC	3	0	-0.2	NC	NC	AT3G56760	calcium-dependent protein kinase, putative / CDPK, putative similar to calcium/calmodulin-dependent protein kinase CaMK3 [Nicotiana tabacum] gi|16904226|gb|AAL30820
246319_at	AT3G56680	12	4		NC	NC	MC_I	3256.4	3210.9	3233.65	P	P	0.000244	0.000244	4144.1	3884.5	4014.3	P	P	0.000244	0.000244	0.3	0.3	0.3	0.3	0.3	0	I	I	NC	MI	2	0	0	NC	NC	AT3G56680	expressed protein
251705_at	AT3G56400	12	4	I		NC	MC_I	1522.3	1340.2	1431.25	P	P	0.000244	0.000244	2673.8	1794.1	2233.95	P	P	0.000244	0.000244	0.9	1	0.3	0.4	0.65	0.351188	I	I	I	I	4	-0.1	-0.5	NC	D	AT3G56400	WRKY family transcription factor DNA-binding protein 4 WRKY4 - Nicotiana tabacum, EMBL:AF193771
251714_at	AT3G56370	12	4		NC	NC	MC_I	1142.7	1042.5	1092.6	P	P	0.000244	0.000244	1597.3	1311.8	1454.55	P	P	0.000244	0.000244	0.4	0.6	0.2	0.4	0.4	0.163299	I	I	MI	I	3	-0.1	-0.3	NC	NC	AT3G56370	leucine-rich repeat transmembrane protein kinase, putative leucine-rich receptor-like protein kinase - Malus domestica, EMBL:AF053127
251704_at	AT3G56360	12	4		NC	NC	MC_I	5096.7	4482.1	4789.4	P	P	0.001221	0.001221	5657.8	6518.3	6088.05	P	P	0.000732	0.000732	0.1	0.3	0.3	0.4	0.275	0.125831	NC	I	I	I	1	-0.2	0.2	NC	NC	AT3G56360	expressed protein unknown protein 110K5.12 - Sorghum bicolor, TREMBL:AF124045_5
251712_at	AT3G56120	12	4		NC	NC	MC_I	491.4	433.9	462.65	P	P	0.001221	0.01416	716.3	627.5	671.9	P	P	0.000732	0.000244	0.6	0.4	0.3	0.2	0.375	0.170783	I	I	I	MI	3	-0.1	-0.2	NC	NC	AT3G56120	Met-10+ like family protein non-consensus TT donor splice site at exon 4 ; contains Pfam profile PF02475: Met-10+ like-protein
251759_at	AT3G55630	12	4	I		NC	MC_I	1256.7	1274.7	1265.7	P	P	0.000244	0.000244	1965.3	1672.2	1818.75	P	P	0.000244	0.000244	0.5	0.7	0.3	0.4	0.475	0.170783	I	I	I	I	4	-0.1	-0.2	NC	D	AT3G55630	dihydrofolate synthetase/folylpolyglutamate synthetase (DHFS/FPGS4) nearly identical to folylpolyglutamate-dihydrofolate synthetase [Arabidopsis thaliana] GI:17976761
251784_at	AT3G55330	12	4		NC	NC	MC_I	6347	5426.2	5886.6	P	P	0.000244	0.000244	7697.2	7134.4	7415.8	P	P	0.000244	0.000244	0.3	0.5	0.2	0.5	0.375	0.15	I	I	NC	I	3	-0.2	-0.1	NC	NC	AT3G55330	photosystem II reaction center PsbP family protein contains Pfam profile PF01789: PsbP
251780_s_at	AT3G55290;AT3G55310	12	4		NC	NC	MC_D	438.4	622.7	530.55	P	P	0.000732	0.001221	198.7	191	194.85	P	P	0.005859	0.008057	-0.9	-1	-1	-1.1	-1	0.0816497	D	D	D	NC	3	0	-0.4	NC	NC	AT3G55290;AT3G55310	[AT3G55290, short-chain dehydrogenase/reductase (SDR) family protein contains similarity to 3-oxoacyl-[acyl-carrier protein] reductase SP:P51831 from [Bacillus subtilis]];[AT3G55310, short-chain dehydrogenase/reductase (SDR) family protein contains simi
251851_at	AT3G54670	12	4		NC	NC	MC_I	620.2	572.6	596.4	P	P	0.000244	0.000244	919.9	850.5	885.2	P	P	0.000244	0.000244	0.6	0.8	0.4	0.5	0.575	0.170783	I	MI	I	NC	2	0	-0.1	NC	NC	AT3G54670	structural maintenance of chromosomes (SMC) family protein similar to SMC1 protein [Bos taurus] GI:4235253, 14S cohesin SMC1 subunit (SMC protein) [Xenopus laevis] GI:3328231; contains Pfam profiles PF02483: SMC family C-terminal domain, PF02463: RecF/Re
251843_x_at	AT3G54590	12	4		NC	NC	MC_D	1797	1867.6	1832.3	P	P	0.000244	0.000244	1483.6	1474.8	1479.2	P	P	0.000244	0.000244	-0.3	-0.4	-0.3	-0.4	-0.35	0.057735	MD	D	NC	D	1	0.1	0	NC	NC	AT3G54590	proline-rich extensin-like family protein contains proline-rich extensin domains, INTERPRO:IPR002965
251903_at	AT3G54120	12	4		NC	NC	MC_D	582.6	518.6	550.6	P	P	0.001953	0.000732	385.7	429	407.35	P	P	0.001221	0.001953	-0.7	-0.5	-0.5	-0.5	-0.55	0.1	D	D	D	NC	3	-0.2	0.2	NC	NC	AT3G54120	reticulon family protein (RTNLB12) contains Pfam profile PF02453: Reticulon
251910_at	AT3G53810	12	4		NC	NC	MC_D	519	507	513	P	P	0.008057	0.010742	328.4	479.3	403.85	P	P	0.046143	0.023926	-0.4	-0.5	-0.2	-0.4	-0.375	0.125831	MD	NC	D	D	1	0.2	0.2	NC	NC	AT3G53810	lectin protein kinase, putative similar to receptor lectin kinase 3 [Arabidopsis thaliana] gi|4100060|gb|AAD00733; contains protein kinase domain, Pfam:PF00069; contains legume lectins alpha and beta domains, Pfam:PF00138 and Pfam:PF00139
251975_at	AT3G53230	12	4		NC	NC	MC_I	615.2	710.2	662.7	P	P	0.023926	0.01416	800.2	945.8	873	P	P	0.00415	0.001221	0.2	0.2	0.6	0.6	0.4	0.23094	I	NC	I	I	3	0.1	0.3	NC	NC	AT3G53230	cell division cycle protein 48, putative / CDC48, putative very strong similarity to SP|P54609 Cell division cycle protein 48 homolog {Arabidopsis thaliana}; contains Pfam profiles PF00004: ATPase AAA family, PF02359: Cell division protein 48 (CDC48) N-t
251982_at	AT3G53190	12	4		NC	NC	MC_I	1245.3	1380.2	1312.75	P	P	0.000244	0.000244	1807.5	1506.1	1656.8	P	P	0.000244	0.000244	0.5	0.3	0.3	0.1	0.3	0.163299	I	I	I	NC	3	0.2	-0.2	NC	NC	AT3G53190	pectate lyase family protein similar to pectate lyase 2 GP:6606534 from [Musa acuminata]
252022_at	AT3G52930	12	4		NC	NC	MC_D	24065.6	27835.6	25950.6	P	P	0.00293	0.010742	19879.1	18921	19400	P	P	0.001953	0.010742	-0.2	-0.4	-0.1	-0.4	-0.275	0.15	D	D	NC	D	3	0.2	0.1	NC	NC	AT3G52930	fructose-bisphosphate aldolase, putative similar to SP|O65735|ALF_CICAR Fructose-bisphosphate aldolase, cytoplasmic isozyme {Cicer arietinum}, cytosolic aldolase [Fragaria x ananassa] GI:10645188; contains Pfam profile PF00274 Fructose-bisphosphate aldol
252000_at	AT3G52710	12	4		NC	NC	MC_D	447.5	440.1	443.8	P	P	0.000244	0.000244	299.4	456.6	378	P	P	0.001953	0.005859	-0.5	-0.9	-0.3	-0.2	-0.475	0.30957	D	D	D	NC	3	0.2	0.3	NC	NC	AT3G52710	expressed protein predicted protein, Arabidopsis thaliana
256676_at	AT3G52180	12	4		NC	NC	MC_D	2739.7	2945.5	2842.6	P	P	0.000244	0.000244	2634	2223.8	2428.9	P	P	0.000244	0.000244	-0.4	-0.3	-0.3	-0.4	-0.35	0.057735	MD	D	D	D	1	0.1	0.2	NC	NC	AT3G52180	protein tyrosine phosphatase/kinase interaction sequence protein (PTPKIS1) identical to PTPKIS1 protein [Arabidopsis thaliana] GI:11595504; contains Pfam profile PF00782: Dual specificity phosphatase, catalytic domain
252032_at	AT3G52150	12	4		NC	NC	MC_I	9062.1	10045.1	9553.6	P	P	0.000244	0.000732	12415.3	10887.5	11651.4	P	P	0.000244	0.000732	0.4	0.3	0.2	0.2	0.275	0.0957427	I	I	MI	NC	2	0.1	-0.2	NC	NC	AT3G52150	RNA recognition motif (RRM)-containing protein similar to chloroplast RNA-binding protein cp33 [Arabidopsis thaliana] GI:681912; contains InterPro entry IPR000504: RNA-binding region RNP-1 (RNA recognition motif) (RRM) domain
246302_at	AT3G51860	12	4	D	NC		MC_D	3700.3	4540.2	4120.25	P	P	0.000244	0.000244	2971.1	2848.3	2909.7	P	P	0.000244	0.000244	-0.5	-1.1	-0.4	-0.9	-0.725	0.330404	D	D	D	D	4	0.5	0.2	I	NC	AT3G51860	cation exchanger, putative (CAX3) similar to high affinity calcium antiporter CAX1 [Arabidopsis thaliana] gi|9256741|gb|AAB05913; Ca2+:Cation Antiporter (CaCA) Family member PMID:11500563; non-consensus AT-acceptor splice site at intron 1
246301_at	AT3G51850	12	4		NC	NC	MC_I	1320.9	1319.1	1320	P	P	0.000244	0.000244	1618.6	1832	1725.3	P	P	0.000244	0.000244	0.4	0.3	0.4	0.4	0.375	0.05	I	MI	I	NC	2	0	0	NC	NC	AT3G51850	calcium-dependent protein kinase, putative / CDPK, putative similar to calcium-dependent protein kinase [Arabidopsis thaliana] gi|836942|gb|AAA67655; contains protein kinase domain, Pfam:PF00069; contains EF hand domain (calcium-binding EF-hand), Pfam:PF
246307_at	AT3G51800	12	4		NC	NC	MC_I	6826.7	7733.6	7280.15	P	P	0.000244	0.000244	9064.5	8625.3	8844.9	P	P	0.000244	0.000244	0.4	0.3	0.3	0.2	0.3	0.0816497	I	I	I	NC	3	0.1	-0.1	NC	NC	AT3G51800	metallopeptidase M24 family protein similar to SP|P50580 Proliferation-associated protein 2G4 {Mus musculus}; contains Pfam profile PF00557: metallopeptidase family M24
252080_at	AT3G51670	12	4		NC	NC	MC_I	2449.7	2288.3	2369	P	P	0.000244	0.000244	3305.2	3380.7	3342.95	P	P	0.000244	0.000244	0.3	0.5	0.3	0.5	0.4	0.11547	I	I	NC	I	3	-0.3	-0.1	NC	NC	AT3G51670	SEC14 cytosolic factor family protein / phosphoglyceride transfer family protein similar to polyphosphoinositide binding protein Ssh2p (GI:2739046) {Glycine max};; contains Pfam PF00650 : CRAL/TRIO domain; contains Pfam PF03765 : CRAL/TRIO, N-terminus
252158_at	AT3G50530	12	4		NC	NC	MC_I	1651.8	1642	1646.9	P	P	0.000244	0.000244	2159.8	2058.1	2108.95	P	P	0.000244	0.000244	0.4	0.5	0.3	0.4	0.4	0.0816497	I	I	NC	I	3	-0.1	-0.1	NC	NC	AT3G50530	calcium-dependent protein kinase, putative / CDPK, putative similar to calcium/calmodulin-dependent protein kinase CaMK3 [Nicotiana tabacum] gi|16904226|gb|AAL30820
252280_at	AT3G49260	12	4		NC	NC	MC_I	657.9	786.3	722.1	P	P	0.000732	0.000732	1018.4	965	991.7	P	P	0.000244	0.000244	0.6	0.3	0.4	0.2	0.375	0.170783	I	MI	I	NC	2	0.3	-0.1	NC	NC	AT3G49260	calmodulin-binding family protein low similarity to SF16 protein [Helianthus annuus] GI:560150; contains Pfam profile PF00612: IQ calmodulin-binding motif
252287_at	AT3G49080	12	4		NC	NC	MC_I	1461.5	1405.1	1433.3	P	P	0.000244	0.000244	1593.3	1936.1	1764.7	P	P	0.000244	0.000244	0.5	0.4	0.4	0.3	0.4	0.0816497	I	I	I	NC	3	0.1	0	NC	NC	AT3G49080	ribosomal protein S9 family protein contains Pfam profile PF00380: ribosomal protein S9
252293_at	AT3G48990	12	4		NC	NC	MC_D	26963.7	27856.5	27410.1	P	P	0.000244	0.000244	20688.6	21589.6	21139.1	P	P	0.000244	0.000244	-0.3	-0.4	-0.1	-0.2	-0.25	0.129099	D	D	NC	D	3	0.1	0.2	NC	NC	AT3G48990	AMP-dependent synthetase and ligase family protein similar to peroxisomal-coenzyme A synthetase (FAT2) [gi:586339] from Saccharomyces cerevisiae; contains Pfam AMP-binding enzyme domain PF00501; identical to cDNA; identical to cDNA adenosine monophosphat
252328_at	AT3G48570	12	4		NC	NC	MC_D	3867.6	3756.3	3811.95	P	P	0.000244	0.000244	2939.5	3337.9	3138.7	P	P	0.000244	0.000244	-0.4	-0.3	-0.2	-0.4	-0.325	0.0957427	D	D	D	NC	3	0	0.1	NC	NC	AT3G48570	protein transport protein SEC61 gamma subunit, putative similar to Swiss-Prot:Q19967 protein transport protein SEC61 gamma subunit [Caenorhabditis elegans]
252367_at	AT3G48360	12	4	I	NC		MC_I	4310.8	3027.5	3669.15	P	P	0.000732	0.001221	6698.1	7769.1	7233.6	P	P	0.000244	0.000732	1.1	1.7	0.9	1.6	1.325	0.386221	I	I	I	I	4	-0.6	-0.1	D	NC	AT3G48360	speckle-type POZ protein-related contains Pfam PF00651 : BTB/POZ domain; similar to Speckle-type POZ protein (SP:O43791) [Homo sapiens]
252404_at	AT3G48110	12	4		NC	NC	MC_I	781.2	1105.1	943.15	P	P	0.000732	0.000244	1267.8	1170.8	1219.3	P	P	0.000244	0.000244	0.7	0.4	0.5	0	0.4	0.294392	I	I	I	NC	3	0.3	-0.1	NC	NC	AT3G48110	aminoacyl-t-RNA synthetase, putative similar to aminoacyl-t-RNA synthetase GI:2654226 from [Arabidopsis thaliana]; contains Pfam profiles: PF02092 glycyl-tRNA synthetase beta subunit,PF02091 glycyl-tRNA synthetase alpha subunit
252379_at	AT3G47730	12	4		NC	NC	MC_I	832.9	674	753.45	P	P	0.000244	0.000244	999.5	820.9	910.2	P	P	0.000244	0.000244	0.4	0.5	0.3	0.2	0.35	0.129099	I	I	NC	I	3	0	-0.2	NC	NC	AT3G47730	ABC transporter family protein AbcA, Dictyostelium discoideum, DDU66526
252425_at	AT3G47620	12	4	I		NC	MC_I	852	1047.6	949.8	P	P	0.001221	0.00293	1005.8	1231.9	1118.85	P	P	0.000732	0.001221	0.4	0.3	0.7	0.6	0.5	0.182574	I	I	I	I	4	0	0.3	NC	I	AT3G47620	TCP family transcription factor, putative auxin-induced basic helix-loop-helix transcription factor - Gossypium hirsutum, EMBL:AF165924
252419_at	AT3G47510	12	4		NC	NC	MC_D	966.8	823.3	895.05	P	P	0.000244	0.000244	740.6	613.3	676.95	P	P	0.000244	0.000244	-0.5	-0.5	-0.5	-0.4	-0.475	0.05	D	D	D	NC	3	-0.2	0.1	NC	NC	AT3G47510	expressed protein
252483_at	AT3G46600	12	4		NC	NC	MC_I	577.8	644.7	611.25	P	P	0.000244	0.000732	1032.1	773.5	902.8	P	P	0.000244	0.000244	0.5	0.7	0.4	0.4	0.5	0.141421	I	I	NC	MI	2	-0.1	-0.4	NC	NC	AT3G46600	scarecrow transcription factor family protein scarecrow-like 11 - Arabidopsis thaliana, EMBL:AF036307
252511_at	AT3G46280	12	4	D	NC		MC_D	1406.6	1893	1649.8	P	P	0.000244	0.000244	767.6	883.4	825.5	P	P	0.000244	0.000244	-0.7	-1.4	-0.5	-1.2	-0.95	0.420317	D	D	D	D	4	0.6	0.1	I	NC	AT3G46280	protein kinase-related contains similarity to light repressible receptor protein kinase [Arabidopsis thaliana] gi|1321686|emb|CAA66376
252516_at	AT3G46100	12	4		NC	NC	MC_I	1345.8	1276.9	1311.35	P	P	0.000732	0.000732	1830.3	1901.8	1866.05	P	P	0.000244	0.000732	0.4	0.4	0.3	0.3	0.35	0.057735	I	I	I	NC	3	0	-0.1	NC	NC	AT3G46100	histidyl-tRNA synthetase / histidine--tRNA ligase identical to histidyl-tRNA synthetase [Arabidopsis thaliana] GI:3659909
246339_at	AT3G44890	12	4		NC	NC	MC_I	9389	9442.2	9415.6	P	P	0.000244	0.000244	12684.3	11227.5	11955.9	P	P	0.000244	0.000244	0.4	0.4	0.3	0.2	0.325	0.0957427	I	I	I	NC	3	0.1	-0.1	NC	NC	AT3G44890	50S ribosomal protein L9, chloroplast (CL9) contains Pfam profile PF03948: Ribosomal protein L9, C-terminal domain; contains Pfam profile PF01281: ribosomal protein L9, N-terminal domain; contains TIGRfam profile TIGR00158: ribosomal protein L9
252678_s_at	AT3G44310;AT3G44300	12	4		NC	NC	MC_D	18937	17784.1	18360.5	P	P	0.000244	0.000244	14055.7	13405.2	13730.5	P	P	0.000244	0.000244	-0.3	-0.3	-0.4	-0.3	-0.325	0.05	D	NC	D	D	3	0	-0.1	NC	NC	AT3G44310;AT3G44300	[AT3G44310, nitrilase 1 (NIT1) identical to SP|P32961 Nitrilase 1 (EC 3.5.5.1) {Arabidopsis thaliana}];[AT3G44300, nitrilase 2 (NIT2) identical to SP|P32962 Nitrilase 2 (EC 3.5.5.1) {Arabidopsis thaliana}]
252676_at	AT3G44280	12	4		NC	NC	MC_D	1813.5	1594.4	1703.95	P	P	0.000244	0.000244	1486.1	1315.2	1400.65	P	P	0.000244	0.000244	-0.3	-0.2	-0.4	-0.3	-0.3	0.0816497	D	NC	D	MD	2	0	-0.1	NC	NC	AT3G44280	expressed protein
246328_at	AT3G43590	12	4		NC	NC	MC_I	774.3	581.1	677.7	P	P	0.023926	0.018555	805.2	627.6	716.4	P	P	0.00293	0.008057	0.6	0.8	0.4	0.4	0.55	0.191485	I	I	I	NC	3	-0.2	-0.2	NC	NC	AT3G43590	zinc knuckle (CCHC-type) family protein contains Pfam domain, PF00098: Zinc knuckle
256711_at	AT3G30390	12	4		NC	NC	MC_D	18783.1	19683.3	19233.2	P	P	0.000244	0.000244	15509	14956.2	15232.6	P	P	0.000244	0.000244	-0.4	-0.3	-0.3	-0.3	-0.325	0.05	D	D	D	MD	3	0	0	NC	NC	AT3G30390	amino acid transporter family protein low similarity to neuronal glutamine transporter [Rattus norvegicus] GI:6978016; belongs to INTERPRO:IPR002422 amino acid/polyamine transporter, family II
256598_at	AT3G30180	12	4		NC	NC	MC_D	957.5	1047.1	1002.3	P	P	0.000244	0.000244	652.9	701.3	677.1	P	P	0.000244	0.000244	-0.5	-0.6	-0.4	-0.7	-0.55	0.129099	MD	D	D	D	1	0.2	-0.1	NC	NC	AT3G30180	cytochrome P450, putative similar to cytochrome P450 homolog (SP:U54770) [Lycopersicon esculentum]
256585_at	AT3G28760	12	4		NC	NC	MC_I	397.9	350.9	374.4	P	P	0.000732	0.005859	529.7	635.1	582.4	P	P	0.000244	0.001221	0.6	0.8	0.5	0.6	0.625	0.125831	I	I	NC	I	3	-0.5	0	NC	NC	AT3G28760	expressed protein contains Pfam PF01959: predicted 3-dehydroquinate synthase
257714_at	AT3G27360	12	4	I		NC	MC_I	672.4	504.3	588.35	P	P	0.000244	0.000244	1518.6	1113.7	1316.15	P	P	0.000244	0.000244	1.1	1.4	0.8	1.2	1.125	0.25	I	I	I	I	4	-0.4	-0.4	NC	D	AT3G27360	histone H3 identical to histone H3 from Zea mays SP|P05203, Medicago sativa GI:166384, Encephalartos altensteinii SP|P08903, Pisum sativum SP|P02300; contains Pfam profile PF00125 Core histone H2A/H2B/H3/H4
257174_at	AT3G27190	12	4		NC	NC	MC_D	1498.3	1619.1	1558.7	P	P	0.000244	0.000244	1428.3	1159.7	1294	P	P	0.000244	0.000244	-0.3	-0.6	-0.3	-0.5	-0.425	0.15	MD	D	NC	D	1	0.2	-0.1	NC	NC	AT3G27190	uracil phosphoribosyltransferase, putative / UMP pyrophosphorylase, putative / UPRTase, putative similar to SP|O65583 Uracil phosphoribosyltransferase (EC 2.4.2.9) (UMP pyrophosphorylase) (UPRTase) {Arabidopsis thaliana}; contains Pfam profile PF00485: P
257789_at	AT3G27020	12	4		NC	NC	MC_I	1645.3	1567.9	1606.6	P	P	0.000244	0.000244	1852	2118.9	1985.45	P	P	0.000244	0.000244	0.3	0.4	0.4	0.5	0.4	0.0816497	NC	I	I	I	1	-0.1	0.2	NC	NC	AT3G27020	oligopeptide transporter OPT family protein similar to iron-phytosiderophore transporter protein yellow stripe 1 [Zea mays] GI:10770865; contains Pfam profile PF03169: OPT oligopeptide transporter protein
257831_at	AT3G26710	12	4		NC	NC	MC_I	6823	5881	6352	P	P	0.000244	0.000244	8054.1	7798.3	7926.2	P	P	0.000244	0.000244	0.2	0.4	0.2	0.3	0.275	0.0957427	I	I	NC	I	3	-0.2	0	NC	NC	AT3G26710	expressed protein
257611_at	AT3G26580	12	4		NC	NC	MC_I	5260.4	4857	5058.7	P	P	0.000244	0.000244	6478.3	7501.3	6989.8	P	P	0.000244	0.000244	0.2	0.4	0.4	0.6	0.4	0.163299	NC	I	I	I	1	-0.2	0.2	NC	NC	AT3G26580	expressed protein
256883_at	AT3G26440	12	4		NC	NC	MC_D	1411.2	1629.1	1520.15	P	P	0.000244	0.000732	1226.1	1077.5	1151.8	P	P	0.000732	0.000732	-0.4	-0.3	-0.5	-0.6	-0.45	0.129099	NC	D	D	D	1	0.1	-0.2	NC	NC	AT3G26440	expressed protein contains Pfam profile PF05212: Protein of unknown function (DUF707)
257628_at	AT3G26290	12	4		NC	NC	MC_D	1120.2	1237	1178.6	P	P	0.000244	0.000244	787	850.1	818.55	P	P	0.000244	0.000732	-0.5	-0.7	-0.5	-0.5	-0.55	0.1	D	D	NC	D	3	0.1	0.1	NC	NC	AT3G26290	cytochrome P450 71B26, putative (CYP71B26) identical to cytochrome P450 71B26 (SP:Q9LTL0) [Arabidopsis thaliana]; contains Pfam profile: PF00067 cytochrome P450
257634_s_at	AT3G26180;AT3G26170	12	4		NC	NC	MC_D	3148.6	2857.1	3002.85	P	P	0.000244	0.000244	2691.2	2287.3	2489.25	P	P	0.000244	0.000244	-0.4	-0.4	-0.4	-0.4	-0.4	0	D	NC	D	D	3	-0.1	-0.1	NC	NC	AT3G26180;AT3G26170	[AT3G26180, cytochrome P450 71B20, putative (CYP71B2) identical to cytochrome P450 71B20 (SP:Q9LTM3) [Arabidopsis thaliana]; similar to cytochrome P450 GB:O65784 [Arabidopsis thaliana]];[AT3G26170, cytochrome P450 71B19, putative (CYP71B19) Identical to
257647_at	AT3G25805	12	4		NC	NC	MC_I	1712.4	1562	1637.2	P	P	0.000732	0.000732	2234.2	2427.5	2330.85	P	P	0.000732	0.000732	0.4	0.4	0.3	0.4	0.375	0.05	I	I	NC	I	3	-0.1	0	NC	NC	AT3G25805	expressed protein
256754_at	AT3G25690	12	4		NC	NC	MC_I	5021.8	3811.8	4416.8	P	P	0.000244	0.000244	6288.3	5903.4	6095.85	P	P	0.000244	0.000244	0.4	0.6	0.3	0.5	0.45	0.129099	I	I	NC	I	3	-0.3	0	NC	NC	AT3G25690	hydroxyproline-rich glycoprotein family protein Common family members: At4g18570, At4g04980, At5g61090 [Arabidopsis thaliana]; identical to cDNA CHUP1 for actin binding protein GI:28071264
257590_s_at	AT3G24870;AT3G24880	12	4		NC	NC	MC_I	393.3	450.5	421.9	P	P	0.001953	0.000732	624.8	641.9	633.35	P	P	0.001221	0.000732	0.6	0.4	0.5	0.3	0.45	0.129099	I	NC	I	I	3	0.4	0	NC	NC	AT3G24870;AT3G24880	[AT3G24870, expressed protein];[AT3G24880, expressed protein]
258108_at	AT3G23570	12	4		NC	NC	MC_D	3223.2	3191.4	3207.3	P	P	0.000732	0.000732	2004.4	2682.8	2343.6	P	P	0.000732	0.000732	-0.6	-0.5	-0.3	-0.3	-0.425	0.15	D	D	D	NC	3	-0.1	0.4	NC	NC	AT3G23570	dienelactone hydrolase family protein similar to SP|Q9ZT66 Endo-1,3;1,4-beta-D-glucanase precursor (EC 3.2.1.-) {Zea mays}; contains Pfam profile: PF01738 dienelactone hydrolase family
257175_s_at	AT3G23470;AT3G23480	12	4		NC	NC	MC_I	152.6	110.9	131.75	P	P	0.01416	0.001953	202.9	227.4	215.15	P	P	0.000244	0.001953	0.8	1.2	0.5	0.6	0.775	0.30957	I	I	NC	I	3	-0.6	-0.5	NC	NC	AT3G23470;AT3G23480	[AT3G23470, cyclopropane-fatty-acyl-phospholipid synthase family protein similar to cyclopropane synthase [Sterculia foetida] GI:21069167; contains Pfam profile PF02353: Cyclopropane-fatty-acyl-phospholipid synthase];[AT3G23480, cyclopropane fatty acid
258291_at	AT3G23310	12	4		NC	NC	MC_I	488.4	486.9	487.65	P	P	0.000244	0.000244	651.9	622.9	637.4	P	P	0.000244	0.000244	0.2	0.5	0.2	0.5	0.35	0.173205	I	I	NC	I	3	-0.2	0	NC	NC	AT3G23310	protein kinase, putative contains protein kinase domain, Pfam:PF00069
258288_at	AT3G23295	12	4		NC	NC	MC_D	471.1	573.4	522.25	P	P	0.000244	0.000244	504.3	467.6	485.95	P	P	0.00415	0.001221	-0.3	-0.5	-0.2	-0.4	-0.35	0.129099	D	D	NC	D	3	0.2	-0.1	NC	NC	AT3G23295	expressed protein
256942_at	AT3G23290	12	4		NC	NC	MC_D	1404.5	1297.6	1351.05	P	P	0.000244	0.000244	1050.1	922.2	986.15	P	P	0.000244	0.000244	-0.5	-0.7	-0.4	-0.5	-0.525	0.125831	D	D	MD	D	3	0.3	0.1	NC	NC	AT3G23290	expressed protein contains Pfam profile PF04852: Protein of unknown function (DUF640)
257925_at	AT3G23170	12	4		NC	NC	MC_D	629.8	773.7	701.75	P	P	0.000244	0.000244	544	450.8	497.4	P	P	0.000244	0.001221	-0.1	-0.4	-0.5	-0.7	-0.425	0.25	NC	D	D	D	1	0.3	-0.3	NC	NC	AT3G23170	expressed protein
257759_at	AT3G23070	12	4		NC	NC	MC_I	494.2	540.7	517.45	P	P	0.005859	0.008057	746.7	710.3	728.5	P	P	0.00415	0.005859	0.6	0.6	0.5	0.5	0.55	0.057735	I	I	I	MI	3	0	-0.1	NC	NC	AT3G23070	expressed protein contains Pfam domain, PF04581: Protein of unknown function (DUF578)
258321_at	AT3G22840	12	4		NC	NC	MC_D	1814.2	1577.6	1695.9	P	P	0.000244	0.000244	1333.7	1373.2	1353.45	P	P	0.000244	0.001953	-0.4	-0.3	-0.4	-0.4	-0.375	0.05	D	NC	D	D	3	-0.1	-0.1	NC	NC	AT3G22840	chlorophyll A-B binding family protein / early light-induced protein (ELIP) identical to early light-induced protein; ELIP [Arabidopsis thaliana] GI:1872544; contains Pfam profile: PF00504 chlorophyll A-B binding protein; identical to cDNA early light-in
256617_at	AT3G22240	12	4		NC	NC	MC_D	22579	24260.2	23419.6	P	P	0.000244	0.000244	18307.7	19958.4	19133	P	P	0.000244	0.000244	-0.4	-0.3	-0.3	-0.3	-0.325	0.05	D	D	NC	MD	2	0	0.1	NC	NC	AT3G22240	expressed protein
256792_at	AT3G22150	12	4	I		NC	MC_I	332.3	301.3	316.8	P	P	0.018555	0.005859	732.4	576.1	654.25	P	P	0.000244	0.001953	1	1	0.7	0.8	0.875	0.15	I	I	I	I	4	-0.2	-0.3	NC	D	AT3G22150	pentatricopeptide (PPR) repeat-containing protein contains INTERPRO:IPR002885 PPR repeats
256825_at	AT3G22120	12	4		NC	NC	MC_D	25348	28804.3	27076.2	P	P	0.000244	0.000244	22853	19648.7	21250.8	P	P	0.000244	0.000244	-0.2	-0.4	-0.3	-0.6	-0.375	0.170783	NC	D	D	D	1	0.2	-0.2	NC	NC	AT3G22120	protease inhibitor/seed storage/lipid transfer protein (LTP) family protein similar to SP|Q00451|PRF1_LYCES 36.4 kDa proline-rich protein Lycopersicon esculentum, proline-rich cell wall protein [Medicago sativa] GI:3818416; contains Pfam profile PF00234
258038_at	AT3G21260	12	4		NC	NC	MC_I	1321.4	796.7	1059.05	P	P	0.000244	0.000732	1526.3	1760.5	1643.4	P	P	0.000244	0.000244	0.3	0.4	0.4	0.7	0.45	0.173205	NC	I	I	I	1	-0.2	0.2	NC	NC	AT3G21260	glycolipid transfer protein-related contains weak similarity to Glycolipid transfer protein (GLTP) (Swiss-Prot:P17403) [Sus scrofa]
256805_at	AT3G20930	12	4		NC	NC	MC_I	661.1	721.7	691.4	P	P	0.000732	0.000244	1116.3	959.2	1037.75	P	P	0.000244	0.000244	0.7	0.7	0.5	0.6	0.625	0.0957427	I	I	I	NC	3	0	-0.3	NC	NC	AT3G20930	RNA recognition motif (RRM)-containing protein contains Pfam profile: PF00076 RNA recognition motif
257088_at	AT3G20510	12	4		NC	NC	MC_D	4558.9	4134.8	4346.85	P	P	0.000244	0.000244	3270.9	3343.9	3307.4	P	P	0.000244	0.000244	-0.4	-0.4	-0.3	-0.2	-0.325	0.0957427	D	D	D	NC	3	0	0.1	NC	NC	AT3G20510	expressed protein contains Pfam profile PF03647: Uncharacterised protein family (UPF0136)
262476_at	AT3G19980;AT1G50370	12	4		NC	NC	MC_I	3348.6	2885.2	3116.9	P	P	0.000244	0.000244	4139.9	3659.5	3899.7	P	P	0.000244	0.000244	0.3	0.5	0.3	0.4	0.375	0.0957427	I	I	NC	I	3	-0.1	-0.1	NC	NC	AT3G19980;AT1G50370	[AT3G19980, serine/threonine protein phosphatase (STPP) identical to serine/threonine protein phosphatase [Arabidopsis thaliana] GI:14582206; very similar to serine/threonine protein phosphatase GB:Z47076 GI:1143510 [Malus domestica]; contains Pfam profi
257024_at	AT3G19100	12	4		NC	NC	MC_I	1088.8	1079.2	1084	P	P	0.001953	0.001953	1110.2	1354	1232.1	P	P	0.000244	0.001953	0.4	0.5	0.4	0.5	0.45	0.057735	I	I	I	MI	3	-0.2	-0.1	NC	NC	AT3G19100	calcium-dependent protein kinase, putative / CDPK, putative similar to calcium/calmodulin-dependent protein kinase CaMK3 [Nicotiana tabacum] gi|16904226|gb|AAL30820; contains protein kinase domain, Pfam:PF00069; contains serine/threonine protein kinase d
257756_at	AT3G18680	12	4	I	NC		MC_I	2646.3	3107.6	2876.95	P	P	0.000244	0.000244	4317.7	4259.5	4288.6	P	P	0.000244	0.000244	0.6	0.3	0.6	0.4	0.475	0.15	I	I	I	I	4	0.3	0	I	NC	AT3G18680	aspartate/glutamate/uridylate kinase family protein similar to UMP-kinase GB:CAB38122 gi:4468612 from [Lactococcus lactis] ; contains Pfam profile PF00696: Amino acid kinase family
257717_at	AT3G18390	12	4		NC	NC	MC_I	1522.3	1465	1493.65	P	P	0.000244	0.000244	2352.8	2267.2	2310	P	P	0.000244	0.000244	0.5	0.6	0.4	0.4	0.475	0.0957427	I	I	NC	I	3	-0.1	-0.1	NC	NC	AT3G18390	expressed protein contains Pfam domain, PF04581: Protein of unknown function (DUF578)
258154_at	AT3G18210	12	4		NC	NC	MC_I	495.5	484.3	489.9	P	P	0.001221	0.000732	710.4	674.8	692.6	P	P	0.000244	0.000244	0.3	0.4	0.4	0.3	0.35	0.057735	I	MI	I	NC	2	0	0	NC	NC	AT3G18210	oxidoreductase, 2OG-Fe(II) oxygenase family protein contains Pfam domain PF03171 2OG-Fe(II) oxygenase superfamily
258146_at	AT3G18060	12	4		NC	NC	MC_D	3237.9	3300.6	3269.25	P	P	0.001953	0.000732	2468	2870.2	2669.1	P	P	0.001953	0.001221	-0.3	-0.4	-0.1	-0.3	-0.275	0.125831	D	D	NC	D	3	0.1	0.1	NC	NC	AT3G18060	transducin family protein / WD-40 repeat family protein similar to 66 kDa stress protein (SP:P90587) [Physarum polycephalum (Slime mold)]; similar to WDR1 protein GB:AAD05042 [Gallus gallus] (Genomics 56 (1), 59-69 (1999)); contains 11 WD-40 repeats (PF0
258163_at	AT3G17940	12	4		NC	NC	MC_D	2432	3204.2	2818.1	P	P	0.000244	0.000244	1852.6	1740.3	1796.45	P	P	0.000244	0.000244	-0.4	-0.7	-0.4	-0.7	-0.55	0.173205	D	D	NC	D	3	0.3	0	NC	NC	AT3G17940	aldose 1-epimerase family protein similar to ALDOSE 1-EPIMERASE PRECURSOR GB:P05149 [SP|P05149] from [Acinetobacter calcoaceticus]; contains Pfam profile PF01263 Aldose 1-epimerase
257865_at	AT3G17750	12	4		NC	NC	MC_I	495.3	456.3	475.8	P	P	0.000244	0.000244	730.5	695.6	713.05	P	P	0.000244	0.000244	0.5	0.6	0.5	0.3	0.475	0.125831	I	NC	I	I	3	0.2	0.1	NC	NC	AT3G17750	protein kinase family protein contains Pfam profile: PF00069 Eukaryotic protein kinase domain
258350_at	AT3G17510	12	4	I		NC	MC_I	865.5	866.2	865.85	P	P	0.000244	0.000732	1561.8	1273.3	1417.55	P	P	0.000244	0.000244	0.9	1	0.6	0.8	0.825	0.170783	I	I	I	I	4	-0.2	-0.3	NC	D	AT3G17510	CBL-interacting protein kinase 1 (CIPK1) identical to CBL-interacting protein kinase 1 [Arabidopsis thaliana] gi|11066952|gb|AAG28776; contains Pfam profiles PF00069: Protein kinase domain and PF03822: NAF domain; identical to cDNA CBL-interacting protei
257269_at	AT3G17440	12	4		NC	NC	MC_I	982.9	827	904.95	P	P	0.000732	0.000732	1309.5	1105.1	1207.3	P	P	0.001953	0.000732	0.4	0.4	0.5	0.4	0.425	0.05	NC	I	MI	I	1	0.2	-0.1	NC	NC	AT3G17440	novel plant SNARE 13 (NPSN13) identical to Novel plant SNARE 13 (AtNPSN13) (SP:Q9LRP1) {Arabidopsis thaliana}; contains Pfam profile: PF00190 11S plant seed storage protein
258415_at	AT3G17380;AT3G17390	12	4		NC	NC	MC_D	28122	32714.2	30418.1	P	P	0.000244	0.000244	22809.8	23514.5	23162.2	P	P	0.000244	0.000244	-0.3	-0.5	-0.2	-0.4	-0.35	0.129099	D	D	NC	D	3	0.2	0	NC	NC	AT3G17380;AT3G17390	[AT3G17380, meprin and TRAF homology domain-containing protein / MATH domain-containing protein similar to ubiquitin-specific protease 12 [Arabidopsis thaliana] GI:11993471; contains Pfam profile PF00917: MATH domain];[AT3G17390, S-adenosylmethionine sy
257932_at	AT3G17040	12	4		NC	NC	MC_I	711.1	686.1	698.6	P	P	0.000244	0.000244	996.5	955.5	976	P	P	0.000244	0.000244	0.4	0.2	0.5	0.3	0.35	0.129099	I	I	I	NC	3	0.1	0.1	NC	NC	AT3G17040	tetratricopeptide repeat (TPR)-containing protein low similarity to SP|Q9FNS4 PsbB mRNA maturation factor Mbb1, chloroplast precursor {Chlamydomonas reinhardtii}; contains Pfam profile: PF00515: TPR Domain
258419_at	AT3G16670	12	4	D	NC		MC_D	4804.1	6229.8	5516.95	P	P	0.000244	0.000244	1702.9	1548.3	1625.6	P	P	0.000244	0.000244	-1.4	-1.8	-1.5	-2	-1.675	0.275379	D	D	D	D	4	0.5	-0.1	I	NC	AT3G16670	expressed protein
259384_at	AT3G16450	12	4		NC	NC	MC_D	7041.1	9284.6	8162.85	P	P	0.000244	0.000244	6068.1	6615.7	6341.9	P	P	0.000244	0.000244	-0.2	-0.4	-0.2	-0.3	-0.275	0.0957427	D	D	NC	D	3	0.1	0	NC	NC	AT3G16450	jacalin lectin family protein similar to SP|Q9SAV1 Myrosinase binding protein-like At1g52030 {Arabidopsis thaliana}; contains Pfam profile: PF01419 jacalin-like lectin domain
258055_at	AT3G16250	12	4		NC	NC	MC_I	3068.9	2884.8	2976.85	P	P	0.000244	0.000244	4175.6	3827.7	4001.65	P	P	0.000244	0.000244	0.5	0.7	0.2	0.4	0.45	0.208167	I	I	NC	I	3	-0.2	-0.1	NC	NC	AT3G16250	ferredoxin-related contains Pfam profile: PF00111 2Fe-2S iron-sulfur cluster binding domains
258336_at	AT3G16050	12	4		NC	NC	MC_D	887.3	869.4	878.35	P	P	0.000244	0.005859	609.3	725.8	667.55	P	P	0.00293	0.005859	-0.7	-0.5	-0.5	-0.2	-0.475	0.206155	D	D	D	NC	3	0	0.1	NC	NC	AT3G16050	stress-responsive protein, putative similar to ethylene-inducible protein HEVER [Hevea brasiliensis] SWISS-PROT:Q39963; contains Pfam domain, PF01680: SOR/SNZ family
257290_at	AT3G15560	12	4		NC	NC	MC_I	94.5	93.3	93.9	P	P	0.037598	0.013672	190.8	197.9	194.35	P	P	0.000244	0.001953	1	0.9	0.9	0.8	0.9	0.0816497	I	I	I	NC	3	-0.1	0	NC	NC	AT3G15560	expressed protein
258402_at	AT3G15460;AT3G15450	12	4	I	NC		MC_I	7166.4	5731.3	6448.85	P	P	0.000244	0.000244	13037.2	13734	13385.6	P	P	0.000244	0.000244	0.9	1.2	0.9	1.3	1.075	0.206155	I	I	I	I	4	-0.4	0	D	NC	AT3G15460;AT3G15450	[AT3G15460, brix domain-containing protein contains Pfam domain, PF04427: Brix domain];[AT3G15450, expressed protein similar to auxin down-regulated protein ARG10 [Vigna radiata] GI:2970051, wali7 (aluminum-induced protein) [Triticum aestivum] GI:451193
257213_at	AT3G15020	12	4	D	NC		MC_D	2006.1	2533.8	2269.95	P	P	0.000244	0.000244	1764.3	1255.1	1509.7	P	P	0.000244	0.000244	-0.4	-0.7	-0.5	-0.9	-0.625	0.221736	D	D	D	D	4	0.3	0	I	NC	AT3G15020	malate dehydrogenase [NAD], mitochondrial, putative similar to mitochondrial NAD-dependent malate dehydrogenase GB:CAA10320 SP|Q9ZP06 [Arabidopsis thaliana]; contains InterPro entry IPR001236: Lactate/malate dehydrogenase
258064_at	AT3G14650;AT3G14680;AT3G14660	12	4		NC	NC	MC_D	635.9	710	672.95	P	P	0.000244	0.000244	463.3	448.1	455.7	P	P	0.000244	0.000244	-0.4	-0.4	-0.6	-0.7	-0.525	0.15	D	NC	D	D	3	0	-0.1	NC	NC	AT3G14650;AT3G14680;AT3G14660	[AT3G14650, cytochrome P450, putative similar to GB:Q05047 from [Catharanthus roseus]];[AT3G14680, cytochrome P450, putative similar to GB:Q05047 from [Catharanthus roseus]];[AT3G14660, cytochrome P450, putative similar to GB:Q05047 from [Catharanthus
258063_at	AT3G14620	12	4		NC	NC	MC_D	3834.8	3653.9	3744.35	P	P	0.000244	0.000244	2886.9	3254	3070.45	P	P	0.000244	0.000244	-0.4	-0.4	-0.3	-0.4	-0.375	0.05	D	D	D	NC	3	-0.1	0.2	NC	NC	AT3G14620	cytochrome P450, putative similar to GB:Q05047 from [Catharanthus roseus]
257279_at	AT3G14430	12	4		NC	NC	MC_D	2861.3	2732.6	2796.95	P	P	0.000244	0.000244	1929	1846.5	1887.75	P	P	0.000244	0.000244	-0.4	-0.5	-0.4	-0.4	-0.425	0.05	D	D	D	NC	3	0	0.1	NC	NC	AT3G14430	expressed protein
258362_at	AT3G14280	12	4	D	NC		MC_D	1645.3	1207	1426.15	P	P	0.000732	0.000244	774.6	607.4	691	P	P	0.000244	0.000244	-1.2	-0.6	-1.3	-0.9	-1	0.316228	D	D	D	D	4	-0.4	-0.2	D	NC	AT3G14280	expressed protein
257005_at	AT3G14190	12	4		NC	NC	MC_I	457.8	485.8	471.8	P	P	0.000732	0.00293	899.5	838.6	869.05	P	P	0.000244	0.001953	1	0.9	0.7	0.8	0.85	0.129099	I	I	NC	I	3	-0.1	-0.3	NC	NC	AT3G14190	expressed protein
256781_at	AT3G13650	12	4		NC	NC	MC_D	1860.6	1545.7	1703.15	P	P	0.000244	0.000244	1148.7	1286.5	1217.6	P	P	0.000244	0.000244	-0.6	-0.3	-0.6	-0.4	-0.475	0.15	D	MD	D	NC	2	-0.2	0	NC	NC	AT3G13650	disease resistance response protein-related/ dirigent protein-related similar to dirigent protein [Thuja plicata] gi|6694699|gb|AAF25360; similar to pathogenesis-related protein [Pisum sativum] gi|4585273|gb|AAD25355
256983_at	AT3G13470	12	4	I	NC		MC_I	7328.7	8872.3	8100.5	P	P	0.000244	0.000244	11768.7	11460.5	11614.6	P	P	0.000244	0.000244	0.7	0.3	0.6	0.4	0.5	0.182574	I	I	I	I	4	0.4	0	I	NC	AT3G13470	chaperonin, putative similar SWISS-PROT:P21240- RuBisCO subunit binding-protein beta subunit, chloroplast precursor (60 kDa chaperonin beta subunit, CPN-60 beta) [Arabidopsis thaliana]; contains Pfam:PF00118 domain, TCP-1/cpn60 chaperonin family
257178_at	AT3G13070	12	4		NC	NC	MC_I	1462.6	1194.2	1328.4	P	P	0.000244	0.000244	2001.4	1872	1936.7	P	P	0.000244	0.000244	0.4	0.7	0.3	0.5	0.475	0.170783	I	I	MI	I	3	-0.3	-0.1	NC	NC	AT3G13070	CBS domain-containing protein / transporter associated domain-containing protein similar to SP|Q54318 Hemolysin C [Serpulina hyodysenteriae] {Treponema hyodysenteriae}; contains Pfam profiles PF00571: CBS domain, PF03471: Transporter associated domain, P
256266_at	AT3G12320	12	4		NC	NC	MC_I	719.7	626.6	673.15	P	P	0.000244	0.000732	903	1043.3	973.15	P	P	0.000244	0.000244	0.3	0.5	0.5	0.7	0.5	0.163299	MI	I	NC	I	1	-0.2	0.2	NC	NC	AT3G12320	expressed protein
256288_at	AT3G12270	12	4		NC	NC	MC_I	500.7	623.9	562.3	P	P	0.005859	0.005859	618	849.8	733.9	P	P	0.000732	0.001221	0.4	0.2	0.6	0.4	0.4	0.163299	I	NC	I	I	3	0.2	0.1	NC	NC	AT3G12270	protein arginine N-methyltransferase family protein similar to protein arginine N-methyltransferase 3 from {Rattus norvegicus} SP|O70467, {Homo sapiens} SP|O60678
256271_at	AT3G12140	12	4		NC	NC	MC_I	443.3	491.4	467.35	P	P	0.00415	0.001953	752.9	621.3	687.1	P	P	0.000732	0.000732	0.5	0.2	0.4	0.4	0.375	0.125831	I	I	MI	NC	2	0.2	0	NC	NC	AT3G12140	emsy N terminus domain-containing protein / ENT domain-containing protein contains Pfam profile PF03735: ENT domain
256274_at	AT3G12080	12	4		NC	NC	MC_I	1850.7	2051.5	1951.1	P	P	0.00293	0.001221	2981.2	2719.5	2850.35	P	P	0.001221	0.001953	0.6	0.5	0.6	0.3	0.5	0.141421	I	I	I	NC	3	0.1	0	NC	NC	AT3G12080	GTP-binding family protein contains Pfam domain, PF01926: GTPase of unknown function
258755_at	AT3G11950	12	4		NC	NC	MC_I	2782	2669.6	2725.8	P	P	0.000732	0.000244	3959.7	3708.6	3834.15	P	P	0.000244	0.000244	0.3	0.4	0.3	0.3	0.325	0.05	I	I	NC	I	3	0	0	NC	NC	AT3G11950	UbiA prenyltransferase family protein contains Pfam profile PF01040: UbiA prenyltransferase family
258783_at	AT3G11760	12	4		NC	NC	MC_I	397.9	435.6	416.75	P	P	0.01416	0.010742	642	530.6	586.3	P	P	0.001221	0.005859	0.7	0.6	0.6	0.5	0.6	0.0816497	I	I	NC	I	3	0.1	-0.1	NC	NC	AT3G11760	expressed protein
259069_at	AT3G11710	12	4		NC	NC	MC_I	3936.6	4208.4	4072.5	P	P	0.000244	0.000244	5824.5	5266.8	5545.65	P	P	0.000244	0.000244	0.5	0.3	0.4	0.2	0.35	0.129099	I	I	I	NC	3	0.2	0	NC	NC	AT3G11710	lysyl-tRNA synthetase, putative / lysine--tRNA ligase, putative similar to SP|Q43776 Lysyl-tRNA synthetase (EC 6.1.1.6) (Lysine--tRNA ligase) {Lycopersicon esculentum}; contains Pfam profile PF00152: tRNA synthetases class II (D, K and N)
259290_at	AT3G11520	12	4		NC	NC	MC_I	434.1	418.7	426.4	P	P	0.037598	0.046143	693.1	754.9	724	P	P	0.001953	0.008057	1.1	0.8	0.8	1	0.925	0.15	I	I	I	NC	3	0.2	-0.1	NC	NC	AT3G11520	cyclin, putative (CYC2) similar to cyclin [Arabidopsis thaliana] GI:1360646; contains Pfam profiles PF00134: Cyclin, N-terminal domain, PF02984: Cyclin, C-terminal domain; identical to cDNA cyclin box (cyc2) partial cds GI:456019
256252_at	AT3G11340	12	4		NC	NC	MC_I	815.6	694.4	755	P	P	0.001953	0.001221	1267.8	1363.4	1315.6	P	P	0.001953	0.000244	0.5	0.5	0.4	0.3	0.425	0.0957427	I	I	NC	I	3	0	-0.1	NC	NC	AT3G11340	UDP-glucoronosyl/UDP-glucosyl transferase family protein contains Pfam profile: PF00201 UDP-glucoronosyl and UDP-glucosyl transferase
256440_at	AT3G10970	12	4		NC	NC	MC_I	3249	3171.8	3210.4	P	P	0.000244	0.000244	4080.6	3742	3911.3	P	P	0.000244	0.000244	0.3	0.5	0.4	0.4	0.4	0.0816497	I	NC	I	I	3	-0.1	0.1	NC	NC	AT3G10970	haloacid dehalogenase-like hydrolase family protein low similarity to genetic modifier [Zea mays] GI:10444400; contains InterPro accession IPR005834: Haloacid dehalogenase-like hydrolase
258772_at	AT3G10860	12	4		NC	NC	MC_D	8820.2	7492	8156.1	P	P	0.000244	0.000244	6732	6117.5	6424.75	P	P	0.000244	0.000244	-0.4	-0.2	-0.5	-0.4	-0.375	0.125831	D	NC	D	D	3	-0.2	0	NC	NC	AT3G10860	ubiquinol-cytochrome C reductase complex ubiquinone-binding protein, putative / ubiquinol-cytochrome C reductase complex 8.2 kDa protein, putative similar to ubiquinol--cytochrome c reductase GI:633687 from [Solanum tuberosum]
258774_at	AT3G10740	12	4		NC	NC	MC_I	1842.2	1244.5	1543.35	P	P	0.000244	0.000244	2240.8	1855	2047.9	P	P	0.000244	0.000244	0.3	0.5	0.2	0.5	0.375	0.15	I	I	NC	I	3	-0.3	-0.1	NC	NC	AT3G10740	glycosyl hydrolase family protein 51 similar to arabinoxylan arabinofuranohydrolase isoenzyme AXAH-II from GI:13398414 [Hordeum vulgare]
259140_at	AT3G10230	12	4		NC	NC	MC_I	2322.1	2513.8	2417.95	P	P	0.000244	0.000244	2914.5	2972.6	2943.55	P	P	0.000244	0.000244	0.3	0.2	0.3	0.3	0.275	0.05	I	I	MI	I	3	0	0	NC	NC	AT3G10230	lycopene beta cyclase (LYC) identical to lycopene beta cyclase GI:1399183|GB:AAB53337 [Arabidopsis thaliana]
258707_at	AT3G09480	12	4		NC	NC	MC_I	319.3	263.1	291.2	P	P	0.000244	0.000244	466	505.4	485.7	P	P	0.000244	0.000732	0.6	0.6	0.5	0.8	0.625	0.125831	I	MI	I	I	3	-0.2	0	NC	NC	AT3G09480	histone H2B, putative similar to histone from Arabidopsis thaliana GI:2407802, Gossypium hirsutum SP|O22582, H2B-3 GB:CAA12231 from [Lycopersicon esculentum]; contains Pfam profile PF00125 Core histone H2A/H2B/H3/H4
259202_at	AT3G09100	12	4		NC	NC	MC_I	416.5	569	492.75	P	P	0.008057	0.00293	672.3	623.6	647.95	P	P	0.001221	0.00293	0.7	0.4	0.9	0.4	0.6	0.244949	I	NC	I	I	3	0.4	0.1	NC	NC	AT3G09100	mRNA capping enzyme family protein similar to mRNA capping enzyme [Xenopus laevis] GI:7239232; contains Pfam profiles PF01331: mRNA capping enzyme catalytic domain, PF00782: Dual specificity phosphatase catalytic domain
259214_at	AT3G09090;AT3G09085	12	4		NC	NC	MC_D	1214	1035.8	1124.9	P	P	0.000244	0.000244	796.6	808.3	802.45	P	P	0.000244	0.000244	-0.5	-0.2	-0.5	-0.6	-0.45	0.173205	D	MD	D	NC	2	-0.1	0.1	NC	NC	AT3G09090;AT3G09085	[AT3G09090, defective in exine formation protein (DEX1) identical to defective in exine formation [Arabidopsis thaliana] gi|11138669|gb|AAG31444; contains Pfam domain PF01839: FG-GAP repeat];[AT3G09085, expressed protein]
258691_at	AT3G08630	12	4		NC	NC	MC_D	898.9	1088.7	993.8	P	P	0.000244	0.000244	580.2	728.9	654.55	P	P	0.000244	0.001953	-0.5	-0.9	-0.2	-0.6	-0.55	0.288675	D	D	NC	D	3	0.3	0.2	NC	NC	AT3G08630	expressed protein
259247_at	AT3G07570	12	4		NC	NC	MC_D	1312.9	1328.1	1320.5	P	P	0.000244	0.000244	949.5	1104.8	1027.15	P	P	0.000244	0.000732	-0.4	-0.4	-0.4	-0.4	-0.4	0	D	D	D	MD	3	0	0.1	NC	NC	AT3G07570	membrane protein, putative similar to membrane protein SDR2 (GI:1747306) [Mus musculus]
259016_at	AT3G07480	12	4		NC	NC	MC_D	8606.7	10643.4	9625.05	P	P	0.000244	0.000244	7006	7650	7328	P	P	0.000244	0.000244	-0.3	-0.6	-0.1	-0.4	-0.35	0.208167	D	D	NC	D	3	0.2	0.1	NC	NC	AT3G07480	expressed protein
258555_at	AT3G06860	12	4		NC	NC	MC_D	4042.1	4005.8	4023.95	P	P	0.000244	0.000244	2896.7	3076.5	2986.6	P	P	0.000244	0.000244	-0.3	-0.6	-0.2	-0.4	-0.375	0.170783	D	D	NC	D	3	0.2	0.1	NC	NC	AT3G06860	fatty acid multifunctional protein (MFP2) identical to fatty acid multifunctional protein (AtMFP2) GB:AF123254 [gi:4337027] (Arabidopsis thaliana) (fatty acid beta-oxidation); contains Pfam profiles PF02737 (3-hydroxyacyl-CoA dehydrogenase, NAD binding d
258534_at	AT3G06730	12	4		NC	NC	MC_I	2248.4	1985.7	2117.05	P	P	0.000244	0.000244	3341.2	2521.5	2931.35	P	P	0.000244	0.000244	0.5	0.3	0.5	0.3	0.4	0.11547	I	I	I	NC	3	0.1	0	NC	NC	AT3G06730	thioredoxin family protein contains Pfam profile: PF00085 Thioredoxin
258852_at	AT3G06300	12	4		NC	NC	MC_D	1561	1560.5	1560.75	P	P	0.000244	0.000244	1152.9	966.3	1059.6	P	P	0.000244	0.000244	-0.3	-0.4	-0.4	-0.5	-0.4	0.0816497	NC	D	D	D	1	0.1	-0.2	NC	NC	AT3G06300	oxidoreductase, 2OG-Fe(II) oxygenase family protein similar to prolyl 4-hydroxylase, alpha subunit, from Rattus norvegicus [GI:474940], Mus musculus [SP|Q60715], Homo sapiens [GI:18073925]; contains PF03171 2OG-Fe(II) oxygenase superfamily domain
258469_at	AT3G06050	12	4		NC	NC	MC_D	5612	6459.1	6035.55	P	P	0.000244	0.000244	4820.2	5067.9	4944.05	P	P	0.000244	0.000244	-0.2	-0.5	-0.3	-0.4	-0.35	0.129099	D	D	NC	D	3	0.2	0	NC	NC	AT3G06050	alkyl hydroperoxide reductase/thiol specific antioxidant (AhpC/TSA)/mal allergen family protein identical to SP|Q9M7T0 Putative peroxiredoxin, mitochondrial precursor {Arabidopsis thaliana}; similar to thioredoxin peroxidase [Capsicum annuum] GI:18654477
259325_at	AT3G05320	12	4		NC	NC	MC_D	366.7	282.6	324.65	P	P	0.000732	0.000732	139.2	172.3	155.75	P	P	0.01416	0.005859	-1	-0.9	-1.1	-1	-1	0.0816497	D	D	D	NC	3	-0.1	0	NC	NC	AT3G05320	expressed protein
259311_at	AT3G05060	12	4		NC	NC	MC_I	2054.9	1429.1	1742	P	P	0.000732	0.000244	2295.7	1996.4	2146.05	P	P	0.000244	0.000244	0.5	0.4	0.4	0.2	0.375	0.125831	I	I	I	MI	3	0.2	-0.1	NC	NC	AT3G05060	SAR DNA-binding protein, putative strong similarity to SAR DNA-binding protein-1 [Pisum sativum] GI:3132696; contains Pfam profile PF01798: Putative snoRNA binding domain
258804_at	AT3G04760	12	4		NC	NC	MC_I	1746.2	1526.5	1636.35	P	P	0.000244	0.000244	2308.9	2019.1	2164	P	P	0.000244	0.000244	0.4	0.6	0.2	0.3	0.375	0.170783	I	I	NC	I	3	-0.2	-0.2	NC	NC	AT3G04760	pentatricopeptide (PPR) repeat-containing protein contains Pfam profile PF01535: PPR repeat
258588_s_at	AT3G04120;AT1G13440	12	4		NC	NC	MC_D	33864.3	39233.1	36548.7	P	P	0.000244	0.000244	28442.7	26212	27327.3	P	P	0.000244	0.000244	-0.2	-0.5	-0.2	-0.4	-0.325	0.15	D	D	NC	D	3	0.2	0	NC	NC	AT3G04120;AT1G13440	[AT3G04120, glyceraldehyde-3-phosphate dehydrogenase, cytosolic (GAPC) / NAD-dependent glyceraldehyde-3-phosphate dehydrogenase identical to SP|P25858 Glyceraldehyde 3-phosphate dehydrogenase, cytosolic (EC 1.2.1.12) {Arabidopsis thaliana}];[AT1G13440,
258566_at	AT3G04110	12	4		NC	NC	MC_D	592.6	613.2	602.9	P	P	0.000244	0.000244	394.5	470.9	432.7	P	P	0.000732	0.000244	-0.4	-0.8	-0.3	-0.6	-0.525	0.221736	D	D	NC	D	3	0.2	0.3	NC	NC	AT3G04110	glutamate receptor family protein (GLR1.1) (GLR1) identical to putative glutamate receptor (GLR1) GB:AF079998 [Arabidopsis thaliana]; plant glutamate receptor family, PMID:11379626
258617_at	AT3G03000	12	4		NC	NC	MC_D	361.1	450.7	405.9	P	P	0.001221	0.00293	254.1	275.6	264.85	P	P	0.00293	0.000732	-0.6	-0.6	-0.4	-0.5	-0.525	0.0957427	D	D	D	NC	3	-0.1	0.3	NC	NC	AT3G03000	calmodulin, putative similar to calmodulin SP:P04352 from [Chlamydomonas reinhardtii]; contains Pfam profile: PF00036 EF hand (4 copies)
258601_at	AT3G02760	12	4		NC	NC	MC_I	669.1	819.2	744.15	P	P	0.000244	0.000244	1042.1	887	964.55	P	P	0.000244	0.000244	0.6	0.4	0.3	0.2	0.375	0.170783	I	I	MI	NC	2	0.2	-0.2	NC	NC	AT3G02760	histidyl-tRNA synthetase, putative / histidine--tRNA ligase, putative similar to SP|P12081 Histidyl-tRNA synthetase (EC 6.1.1.21) (Histidine--tRNA ligase) (HisRS) {Homo sapiens}; contains Pfam profiles PF00587: tRNA synthetase class II core domain (G, H,
258494_at	AT3G02450	12	4		NC	NC	MC_I	1178.8	1457.7	1318.25	P	P	0.000244	0.000732	1851.5	1664.3	1757.9	P	P	0.000244	0.000244	0.7	0.4	0.5	0.2	0.45	0.208167	I	I	I	NC	3	0.3	-0.2	NC	NC	AT3G02450	cell division protein ftsH, putative similar to SWISS-PROT:P46469 cell division protein ftsH homolog [Lactococcus lactis]; contains Pfam domain, PF00004: ATPase, AAA family ('A'TPases 'A'ssociated with diverse cellular 'A'ctivities)
259077_s_at	AT3G02230	12	4	D	NC		MC_D	19041.2	22265.4	20653.3	P	P	0.000244	0.000244	17003.1	14358.1	15680.6	P	P	0.000244	0.000244	-0.3	-0.6	-0.3	-0.7	-0.475	0.206155	D	D	D	D	4	0.3	0	MI	NC	AT3G02230	reversibly glycosylated polypeptide-1 (RGP1) identical to reversibly glycosylated polypeptide-1 (AtRGP) [Arabidopsis thaliana] GI:2317729
258856_at	AT3G02040;AT3G02030	12	4		NC	NC	MC_I	965.6	1011.6	988.6	P	P	0.000244	0.000244	2036.6	1593.4	1815	P	P	0.000244	0.000244	0.9	0.5	0.6	0.5	0.625	0.189297	I	I	I	NC	3	0.5	-0.2	NC	NC	AT3G02040;AT3G02030	[AT3G02040, glycerophosphoryl diester phosphodiesterase family protein contains Pfam profile PF03009: Glycerophosphoryl diester phosphodiesterase family];[AT3G02030, hydrolase, alpha/beta fold family protein contains Pfam profile PF00561: hydrolase, alp
259164_at	AT3G01770	12	4		NC	NC	MC_I	531.7	417.6	474.65	P	P	0.00415	0.00415	851.5	611.2	731.35	P	P	0.001221	0.000244	0.4	0.6	0.3	0.5	0.45	0.129099	I	I	NC	I	3	-0.2	-0.1	NC	NC	AT3G01770	DNA-binding bromodomain-containing protein contains bromodomain, INTERPRO:IPR001487
259162_at	AT3G01640	12	4		NC	NC	MC_D	738.7	1047.2	892.95	P	P	0.000732	0.001221	609.7	528.2	568.95	P	P	0.000732	0.001953	-0.4	-0.4	-0.5	-0.6	-0.475	0.0957427	NC	D	MD	D	1	0.2	0	NC	NC	AT3G01640	GHMP kinase family protein contains GHMP kinases putative ATP-binding protein domain, Pfam:PF00288
259185_at	AT3G01550	12	4	I	NC		MC_I	502.1	372	437.05	P	P	0.001221	0.008057	752.2	704.4	728.3	P	P	0.000244	0.000732	0.7	1.3	0.5	1	0.875	0.35	I	I	I	I	4	-0.4	-0.2	D	NC	AT3G01550	triose phosphate/phosphate translocator, putative similar to SWISS-PROT:P52178 triose phosphate/phosphate translocator [Cauliflower]{Brassica oleracea}
259165_at	AT3G01470	12	4		NC	NC	MC_D	4508.9	4806.7	4657.8	P	P	0.000244	0.000244	4001.6	4177.2	4089.4	P	P	0.000244	0.000732	-0.2	-0.4	-0.2	-0.4	-0.3	0.11547	MD	D	D	D	1	0.2	0	NC	NC	AT3G01470	homeobox-leucine zipper protein 5 (HAT5) / HD-ZIP protein 5 / HD-ZIP protein (HB-1) identical to homeobox-leucine zipper protein HAT5 (HD-ZIP protein 5) (HD-ZIP protein ATHB-1) GB:Q02283 [Arabidopsis thaliana]
259267_at	AT3G01130	12	4		NC	NC	MC_D	2082.4	2017.1	2049.75	P	P	0.001953	0.001953	1406.9	1820.9	1613.9	P	P	0.00293	0.00415	-0.5	-0.6	-0.3	-0.3	-0.425	0.15	D	D	D	MD	3	0	0.4	NC	NC	AT3G01130	expressed protein
266509_at	AT2G47940	12	4		NC	NC	MC_I	4056.4	3979.5	4017.95	P	P	0.000244	0.000244	5549.6	4920.6	5235.1	P	P	0.000244	0.000244	0.4	0.4	0.3	0.2	0.325	0.0957427	I	I	I	NC	3	0	-0.1	NC	NC	AT2G47940	DegP2 protease (DEGP2) identical to DegP2 protease GI:13172275 from [Arabidopsis thaliana]; identical to cDNA DegP2 protease (DEGP2) nuclear gene for chloroplast product GI:13172274
245176_at	AT2G47440	12	4		NC	NC	MC_D	1915.5	2202.6	2059.05	P	P	0.000732	0.000732	1573.9	1677.6	1625.75	P	P	0.000732	0.001221	-0.3	-0.5	-0.2	-0.4	-0.35	0.129099	D	D	NC	D	3	0.2	0.1	NC	NC	AT2G47440	DNAJ heat shock N-terminal domain-containing protein contains Pfam profiles PF00226: DnaJ domain, PF00515: TPR Domain; similar to GP|2104534|AF001308 (T10M13.11)
266752_at	AT2G47000	12	4		NC	NC	MC_I	640.4	727.9	684.15	P	P	0.001953	0.001953	841.2	926.1	883.65	P	P	0.000244	0.001953	0.3	0.5	0.2	0.5	0.375	0.15	MI	I	NC	I	1	-0.2	-0.1	NC	NC	AT2G47000	multidrug resistant (MDR) ABC transporter, putative similar to multidrug-resistant protein CjMDR1 [Coptis japonica] GI:14715462, MDR-like p-glycoprotein [Arabidopsis thaliana] GI:24324262; contains Pfam profiles PF00005: ABC transporter, PF00664: ABC tra
265454_at	AT2G46530	12	4		NC	NC	MC_I	242.5	234	238.25	P	P	0.000732	0.001221	261.9	367.8	314.85	P	P	0.000732	0.000732	0.4	0.7	0.7	0.8	0.65	0.173205	NC	I	I	I	1	-0.1	0.2	NC	NC	AT2G46530	transcriptional factor B3 family protein / auxin-responsive factor AUX/IAA-related contains Pfam profiles: PF02309 AUX/IAA family, PF02362 B3 DNA binding domain
265456_at	AT2G46505	12	4		NC	NC	MC_D	7056.7	7595.4	7326.05	P	P	0.000244	0.000244	6158.3	5868.2	6013.25	P	P	0.000244	0.000244	-0.4	-0.5	-0.4	-0.5	-0.45	0.057735	D	D	NC	D	3	0.2	0	NC	NC	AT2G46505	expressed protein
266583_at	AT2G46220	12	4		NC	NC	MC_I	6276.2	5893.2	6084.7	P	P	0.000244	0.000244	7497	7308.9	7402.95	P	P	0.000244	0.000244	0.2	0.3	0.2	0.3	0.25	0.057735	I	I	NC	I	3	0	0	NC	NC	AT2G46220	expressed protein
267561_at	AT2G45590	12	4		NC	NC	MC_I	143.4	227.4	185.4	P	P	0.00415	0.00415	265.4	251.2	258.3	P	P	0.001953	0.000732	0.6	0.6	0.9	0.6	0.675	0.15	I	NC	I	I	3	0.4	0.4	NC	NC	AT2G45590	protein kinase family protein contains protein kinase domain, Pfam:PF00069
245136_at	AT2G45210	12	4		NC	NC	MC_D	874.1	748.6	811.35	P	P	0.000732	0.00293	389.6	568.1	478.85	P	P	0.000244	0.005859	-0.6	-0.7	-0.5	-0.3	-0.525	0.170783	D	D	D	NC	3	-0.1	0.3	NC	NC	AT2G45210	auxin-responsive protein-related weakly similar to small auxin up RNA (GI:546362) {Arabidopsis thaliana}
245138_at	AT2G45190	11	4		NC	NC	MC_I	309	318.9	313.95	P	P	0.018555	0.046143	487.4	663.6	575.5	P	P	0.005859	0.018555	0.6	0.6	0.6	0.4	0.55	0.1	I	NC	I	I	3	0.2	0	NC	NC	AT2G45190	axial regulator YABBY1 (YABBY1) / abnormal floral organs protein (AFO) / filamentous flower protein (FIL) identical to YABBY1 [Arabidopsis thaliana] GI:4928749, abnormal floral organs protein (AFO) [Arabidopsis thaliana] GI:4322477; supporting cDNA gi|43
266123_at	AT2G45180	12	4		NC	NC	MC_D	34990.9	36100.9	35545.9	P	P	0.000244	0.000244	30274.7	27396.1	28835.4	P	P	0.000244	0.000244	-0.2	-0.3	-0.3	-0.3	-0.275	0.05	D	D	NC	D	3	0	-0.1	NC	NC	AT2G45180	protease inhibitor/seed storage/lipid transfer protein (LTP) family protein similar to 14 kDa polypeptide [Catharanthus roseus] GI:407410; contains Pfam protease inhibitor/seed storage/LTP family domain PF00234
266822_at	AT2G44860	12	4		NC	NC	MC_I	2949.9	2579.5	2764.7	P	P	0.000244	0.000244	3780.8	3147.9	3464.35	P	P	0.000244	0.000244	0.3	0.5	0.1	0.3	0.3	0.163299	I	I	NC	I	3	-0.1	-0.2	NC	NC	AT2G44860	60S ribosomal protein L24, putative
266889_at	AT2G44640	12	4		NC	NC	MC_I	2261.5	2382.1	2321.8	P	P	0.000732	0.000732	3082.6	2726.8	2904.7	P	P	0.000244	0.000732	0.5	0.3	0.4	0.2	0.35	0.129099	I	I	I	NC	3	0.1	-0.1	NC	NC	AT2G44640	expressed protein
267368_at	AT2G44350	12	4		NC	NC	MC_D	7083	8768	7925.5	P	P	0.000244	0.000244	5840	6647.7	6243.85	P	P	0.000244	0.000244	-0.3	-0.5	-0.1	-0.3	-0.3	0.163299	D	D	NC	D	3	0.3	0.1	NC	NC	AT2G44350	citrate synthase, mitochondrial, putative strong similarity to SP|P20115 Citrate synthase, mitochondrial precursor {Arabidopsis thaliana}; contains Pfam profile PF00285: Citrate synthase
267344_at	AT2G44230	12	4		NC	NC	MC_I	303.1	394	348.55	P	P	0.000244	0.000732	441.7	409.5	425.6	P	P	0.000244	0.000244	0.4	0.5	0.6	0.5	0.5	0.0816497	I	MI	I	I	3	0.1	0	NC	NC	AT2G44230	expressed protein
260556_at	AT2G43620	12	4	D	NC		MC_D	6042.9	9038.6	7540.75	P	P	0.000244	0.000244	1823.5	2053.9	1938.7	P	P	0.000244	0.000244	-1.4	-2	-1.2	-1.9	-1.625	0.386221	D	D	D	D	4	0.6	0.2	I	NC	AT2G43620	chitinase, putative similar to basic endochitinase CHB4 precursor SP:Q06209 from [Brassica napus]
260560_at	AT2G43590	12	4	D		NC	MC_D	16354.3	19331.4	17842.8	P	P	0.000244	0.000244	7443.8	9729.2	8586.5	P	P	0.000244	0.000244	-1.2	-1.4	-0.7	-0.9	-1.05	0.310913	D	D	D	D	4	0.3	0.4	NC	I	AT2G43590	chitinase, putative similar to basic endochitinase CHB4 precursor SP:Q06209 from [Brassica napus]
260542_at	AT2G43560	12	4		NC	NC	MC_I	4488.5	3906.8	4197.65	P	P	0.000244	0.000244	5832	5428.4	5630.2	P	P	0.000244	0.000244	0.3	0.6	0.2	0.4	0.375	0.170783	I	I	NC	I	3	-0.3	0	NC	NC	AT2G43560	immunophilin / FKBP-type peptidyl-prolyl cis-trans isomerase family protein identical to Probable FKBP-type peptidyl-prolyl cis-trans isomerase 2, chloroplast precursor (Ppiase) (Rotamase) (SP:O22870)[Arabidopsis thaliana]; contains Pfam PF00254: peptidy
260544_at	AT2G43540	12	4		NC	NC	MC_D	689.8	884	786.9	P	P	0.000244	0.000244	524.4	698.5	611.45	P	P	0.000244	0.000732	-0.5	-0.7	-0.2	-0.5	-0.475	0.206155	D	D	NC	D	3	0.2	0.3	NC	NC	AT2G43540	expressed protein
260546_at	AT2G43520	12	4		NC	NC	MC_D	2644.4	2174.6	2409.5	P	P	0.000244	0.000244	1581.4	1894.7	1738.05	P	P	0.000244	0.000244	-0.7	-0.5	-0.5	-0.5	-0.55	0.1	D	D	D	MD	3	-0.2	0.1	NC	NC	AT2G43520	trypsin inhibitor, putative similar to SP|P26780 Trypsin inhibitor 2 precursor (MTI-2) {Sinapis alba}
266440_at	AT2G43240	12	4		NC	NC	MC_I	259.8	308.8	284.3	P	P	0.000244	0.000732	668.7	527.7	598.2	P	P	0.000244	0.000244	0.8	0.8	0.6	0.7	0.725	0.0957427	I	I	NC	I	3	-0.1	0	NC	NC	AT2G43240	nucleotide-sugar transporter family protein weak similarity to SP|P78382 CMP-sialic acid transporter {Homo sapiens}; contains Pfam profile PF04142: Nucleotide-sugar transporter
267626_at	AT2G42250	11	4	I	NC		MC_I	434.5	288.7	361.6	P	P	0.00293	0.030273	706.6	656.9	681.75	P	P	0.001221	0.001953	0.7	1.3	0.5	1	0.875	0.35	I	I	I	I	4	-0.6	-0.2	D	NC	AT2G42250	cytochrome P450 family protein similar to cytochrome P450 93A1 (SP:Q42798) [Glycine max]
260494_at	AT2G41820	12	4		NC	NC	MC_I	534.8	435.5	485.15	P	P	0.037598	0.023926	739.9	604.9	672.4	P	P	0.001221	0.01416	0.6	0.8	0.5	0.6	0.625	0.125831	I	I	MI	I	3	-0.1	-0.1	NC	NC	AT2G41820	leucine-rich repeat transmembrane protein kinase, putative
245117_at	AT2G41560	12	4		NC	NC	MC_I	2444.6	2513.4	2479	P	P	0.000732	0.000732	2932.8	2813.3	2873.05	P	P	0.000732	0.000732	0.4	0.2	0.4	0.3	0.325	0.0957427	I	I	I	NC	3	0.1	0	NC	NC	AT2G41560	calcium-transporting ATPase 4, plasma membrane-type / Ca2+-ATPase, isoform 4 (ACA4) identical to SP|O22218 Calcium-transporting ATPase 4, plasma membrane-type (EC 3.6.3.8) (Ca(2+)-ATPase isoform 4) {Arabidopsis thaliana}
245112_at	AT2G41540	12	4		NC	NC	MC_I	726.3	554.5	640.4	P	P	0.000244	0.000244	991.1	733.1	862.1	P	P	0.000244	0.000244	0.4	0.8	0.1	0.4	0.425	0.287228	MI	I	NC	I	1	-0.2	-0.2	NC	NC	AT2G41540	NAD-dependent glycerol-3-phosphate dehydrogenase family protein weak similarity to SP|P46919 Glycerol-3-phosphate dehydrogenase [NAD(P)+] (EC 1.1.1.94) {Bacillus subtilis}; contains Pfam profile PF01210: NAD-dependent glycerol-3-phosphate dehydrogenase
267102_at	AT2G41500	12	4		NC	NC	MC_I	544.6	667.5	606.05	P	P	0.000244	0.000732	750.4	981.9	866.15	P	P	0.000244	0.000244	0.3	0.2	0.5	0.6	0.4	0.182574	I	NC	I	I	3	0.1	0.2	NC	NC	AT2G41500	WD-40 repeat family protein / small nuclear ribonucleoprotein Prp4p-related similar to U4/U6 small nuclear ribonucleoprotein hPrp4 (GP:2708305) {Homo sapiens}; contains Pfam PF00400: WD domain, G-beta repeat (7 copies)|19877698|gb|AU238529.1|AU238529
267084_at	AT2G41180	12	4		NC	NC	MC_D	2360.5	2865.6	2613.05	P	P	0.000244	0.000244	1658.1	2003	1830.55	P	P	0.000244	0.000244	-0.5	-0.7	-0.3	-0.4	-0.475	0.170783	D	D	NC	D	3	0.2	0.2	NC	NC	AT2G41180	sigA-binding protein-related low similarity to SigA binding protein [Arabidopsis thaliana] GI:6980074; contains Pfam domain PF05678: VQ motif
245098_at	AT2G40940	12	4		NC	NC	MC_D	2458.5	2670.1	2564.3	P	P	0.000244	0.000244	2095.4	1873.8	1984.6	P	P	0.000244	0.000244	-0.2	-0.3	-0.3	-0.4	-0.3	0.0816497	NC	MD	D	MD	1	0.1	0	NC	NC	AT2G40940	ethylene response sensor / ethylene-responsive sensor (ERS) identical to ethylene response sensor (ERS) [Arabidopsis thaliana] GI:1046225
255826_at	AT2G40490	12	4		NC	NC	MC_I	3668.7	2796.6	3232.65	P	P	0.000244	0.000244	4210.5	3904.1	4057.3	P	P	0.000244	0.000244	0.3	0.5	0.2	0.3	0.325	0.125831	I	I	NC	I	3	-0.2	-0.1	NC	NC	AT2G40490	uroporphyrinogen decarboxylase, putative / UPD, putative similar to uroporphyrinogen decarboxylase (chloroplast) from Nicotiana tabacum [SP|Q42967], Hordeum vulgare [SP|Q42855], Zea mays [SP|O81220]; contains Pfam domain uroporphyrinogen decarboxylase (U
263382_at	AT2G40230	12	4		NC	NC	MC_D	667.8	403.4	535.6	P	P	0.005859	0.005859	459.9	401.9	430.9	P	P	0.018555	0.023926	-0.8	-0.4	-0.6	-0.4	-0.55	0.191485	D	D	D	NC	3	-0.4	0.2	NC	NC	AT2G40230	transferase family protein similar to taxadienol acetyl transferase from Taxus cuspidata [gi:6978038]; contains Pfam transferase family domain PF002458
245059_at	AT2G39720	12	4		NC	NC	MC_D	1866.9	2150.9	2008.9	P	P	0.000244	0.000244	1360	1389.8	1374.9	P	P	0.000244	0.000732	-0.4	-0.6	-0.3	-0.6	-0.475	0.15	D	NC	D	D	3	0.2	0	NC	NC	AT2G39720	zinc finger (C3HC4-type RING finger) family protein contains Pfam domain, PF00097: Zinc finger, C3HC4 type (RING finger)
267017_at	AT2G39140	12	4		NC	NC	MC_I	299.3	307.2	303.25	P	P	0.000244	0.000244	470.4	533.1	501.75	P	P	0.000244	0.000244	0.5	0.2	0.7	0.5	0.475	0.206155	I	NC	I	I	3	0.2	0.2	NC	NC	AT2G39140	pseudouridine synthase family protein
263265_at	AT2G38820	12	4	I	NC		MC_I	745.6	425	585.3	P	P	0.000244	0.000732	1098.8	1212.3	1155.55	P	P	0.000732	0.000244	0.5	1.4	0.7	1.4	1	0.469042	I	I	I	I	4	-0.6	0	D	NC	AT2G38820	expressed protein contains Pfam profile PF04720: Protein of unknown function (DUF506)
267053_s_at	AT2G38390;AT2G38380	12	4		NC	NC	MC_D	15085.9	16738.9	15912.4	P	P	0.000244	0.000244	11934	12351	12142.5	P	P	0.000244	0.000244	-0.3	-0.2	-0.3	-0.3	-0.275	0.05	D	D	D	MD	3	0	0.1	NC	NC	AT2G38390;AT2G38380	[AT2G38390, peroxidase, putative similar to peroxidase isozyme [Armoracia rusticana] gi|217934|dbj|BAA14144; identical to cDNA class III peroxidase ATP34, GI:17530563];[AT2G38380, peroxidase 22 (PER22) (P22) (PRXEA) / basic peroxidase E identical to SP|
266099_at	AT2G38040	12	4		NC	NC	MC_I	1586.2	1678.3	1632.25	P	P	0.000244	0.000244	2137.1	1937.4	2037.25	P	P	0.000244	0.000244	0.5	0.3	0.3	0.2	0.325	0.125831	I	I	I	NC	3	0.2	-0.1	NC	NC	AT2G38040	acetyl co-enzyme A carboxylase carboxyltransferase alpha subunit family contains Pfam profile: PF03255: Acetyl co-enzyme A carboxylase carboxyltransferase alpha subunit
266091_at	AT2G37920	12	4		NC	NC	MC_I	663.3	680.3	671.8	P	P	0.000244	0.001953	949.4	984.3	966.85	P	P	0.000244	0.000732	0.3	0.3	0.3	0.3	0.3	0	NC	I	I	I	1	0.1	0	NC	NC	AT2G37920	expressed protein
266080_at	AT2G37840	12	4		NC	NC	MC_I	350.9	310.1	330.5	P	P	0.005859	0.008057	510.9	390.1	450.5	P	P	0.000244	0.000244	0.3	0.5	0.2	0.4	0.35	0.129099	I	I	NC	I	3	-0.2	-0.1	NC	NC	AT2G37840	protein kinase family protein contains protein kinase domain, Pfam:PF00069
267162_s_at	AT2G37690	12	4		NC	NC	MC_I	429.5	703.1	566.3	P	P	0.000732	0.001221	745	986.9	865.95	P	P	0.000732	0.000732	0.5	0.2	0.8	0.3	0.45	0.264575	I	NC	I	MI	2	0.5	0.1	NC	NC	AT2G37690	phosphoribosylaminoimidazole carboxylase, putative / AIR carboxylase, putative similar to SP|P55195 Phosphoribosylaminoimidazole carboxylase, chloroplast precursor (EC 4.1.1.21) (AIR carboxylase) (AIRC) {Vigna aconitifolia}; contains Pfam profiles PF0222
267173_at	AT2G37560	12	4		NC	NC	MC_I	280.2	317.9	299.05	P	P	0.000244	0.000244	413.2	516.3	464.75	P	P	0.000244	0.000244	0.6	0.4	0.7	0.5	0.55	0.129099	I	NC	I	I	3	0.1	0.2	NC	NC	AT2G37560	origin recognition complex subunit 2 (ORC2) identical to origin recognition complex subunit 2 (ORC2) SP:Q38899 from [Arabidopsis thaliana]
266009_at	AT2G37420	11	4		NC	NC	MC_I	117.1	111	114.05	P	P	0.008057	0.046143	219.4	177.4	198.4	P	P	0.000732	0.018555	0.6	1.2	0.3	0.9	0.75	0.387298	I	I	NC	MI	2	-0.5	-0.3	NC	NC	AT2G37420	kinesin motor protein-related
265203_at	AT2G36630	12	4		NC	NC	MC_I	578.3	739.2	658.75	P	P	0.00415	0.005859	1091.1	1202.1	1146.6	P	P	0.00293	0.00415	0.4	0.2	0.6	0.3	0.375	0.170783	I	NC	I	I	3	0.2	0.1	NC	NC	AT2G36630	expressed protein contains Pfam profile: PF01925 domain of unknown function DUF81
263915_at	AT2G36430	12	4		NC	NC	MC_I	795	623.5	709.25	P	P	0.001221	0.000244	832.7	999.4	916.05	P	P	0.000244	0.001953	0.3	0.3	0.4	0.5	0.375	0.0957427	NC	MI	I	I	1	-0.1	0.1	NC	NC	AT2G36430	expressed protein contains Pfam profile PF03140: Plant protein of unknown function
263928_at	AT2G36330	12	4		NC	NC	MC_D	806.7	867.3	837	P	P	0.000244	0.000244	569	603.8	586.4	P	P	0.000244	0.000732	-0.4	-0.5	-0.3	-0.5	-0.425	0.0957427	D	D	NC	D	3	0.2	0.1	NC	NC	AT2G36330	integral membrane protein, putative contains 4 transmembrane domains; contains Pfam PF04535 : Domain of unknown function (DUF588); similar to putative ethylene responsive element binding protein (GI:22135858) [Arabidopsis thaliana]
263955_at	AT2G36010	12	4		NC	NC	MC_I	276.7	286.4	281.55	P	P	0.010742	0.005859	359.7	399	379.35	P	P	0.001953	0.001953	0.4	0.2	0.6	0.4	0.4	0.163299	I	NC	I	I	3	0.2	0.4	NC	NC	AT2G36010	E2F transcription factor-3 (E2F3) identical to E2F transcription factor-3 E2F3 [Arabidopsis thaliana] gi|10443853|gb|AAG17610
265800_at	AT2G35630	12	4		NC	NC	MC_I	973.6	1127.3	1050.45	P	P	0.001221	0.000732	1312.8	1288.9	1300.85	P	P	0.000732	0.000732	0.4	0.2	0.5	0.3	0.35	0.129099	I	NC	I	I	3	0.2	0.2	NC	NC	AT2G35630	microtubule organization 1 protein (MOR1) identical to microtubule organization 1 protein GI:14317953 from [Arabidopsis thaliana]
266608_at	AT2G35500	12	4		NC	NC	MC_I	2730.5	2731.2	2730.85	P	P	0.000244	0.000732	3862.9	4086.8	3974.85	P	P	0.000244	0.000244	0.4	0.4	0.4	0.4	0.4	0	I	I	NC	MI	2	-0.1	0	NC	NC	AT2G35500	shikimate kinase-related low similarity to shikimate kinase precursor from Lycopersicon esculentum [SP|Q00497]
266899_at	AT2G34620	12	4		NC	NC	MC_I	2086.6	2167.7	2127.15	P	P	0.000244	0.000244	2862.5	2516.3	2689.4	P	P	0.000244	0.000244	0.4	0.4	0.3	0.2	0.325	0.0957427	I	I	I	NC	3	0.1	-0.2	NC	NC	AT2G34620	mitochondrial transcription termination factor-related / mTERF-related contains Pfam profile PF02536: mTERF
266906_at	AT2G34585	12	4		NC	NC	MC_D	4290.9	4243	4266.95	P	P	0.000244	0.000244	3052.8	3245.1	3148.95	P	P	0.000244	0.000244	-0.5	-0.5	-0.4	-0.4	-0.45	0.057735	D	D	D	NC	3	0	0.1	NC	NC	AT2G34585	expressed protein
266995_at	AT2G34500	12	4		NC	NC	MC_I	525.6	477.6	501.6	P	P	0.010742	0.008057	542.1	761.6	651.85	P	P	0.001221	0.001953	0.6	0.3	0.9	0.8	0.65	0.264575	NC	I	I	I	1	0	0.4	NC	NC	AT2G34500	cytochrome P450 family protein similar to Cytochrome P450 61 (C-22 sterol desaturase) (SP:P54781) {Saccharomyces cerevisiae}
267459_at	AT2G33850	12	4		NC	NC	MC_I	1721.6	1232.8	1477.2	P	P	0.000732	0.000244	2767	1941.2	2354.1	P	P	0.000244	0.000244	0.5	0.9	0.2	0.6	0.55	0.288675	I	I	NC	I	3	-0.2	-0.4	NC	NC	AT2G33850	expressed protein contains 1 transmembrane domain; similar to Protein E6 (Swiss-Prot:Q01197) [Gossypium hirsutum]
255791_at	AT2G33430	12	4		NC	NC	MC_I	3103.1	3253.9	3178.5	P	P	0.000244	0.000244	4026	3953.9	3989.95	P	P	0.000244	0.000244	0.4	0.4	0.3	0.2	0.325	0.0957427	I	I	I	NC	3	0.1	-0.1	NC	NC	AT2G33430	plastid developmental protein DAG, putative similar to DAG protein, chloroplast precursor [Garden snapdragon] SWISS-PROT:Q38732
267553_s_at	AT2G32650;AT2G32180	12	4		NC	NC	MC_I	4224.4	3909.4	4066.9	P	P	0.000244	0.000244	5215.6	4527	4871.3	P	P	0.000244	0.000244	0.3	0.6	0.1	0.3	0.325	0.206155	I	I	NC	I	3	-0.3	-0.2	NC	NC	AT2G32650;AT2G32180	[AT2G32650, expressed protein contains Pfam PF05899: Protein of unknown function (DUF861)];[AT2G32180, expressed protein]
267115_s_at	AT2G32540	12	4		NC	NC	MC_D	2272.2	2314.7	2293.45	P	P	0.000244	0.000244	2049.4	1737.3	1893.35	P	P	0.001221	0.00293	-0.4	-0.1	-0.6	-0.4	-0.375	0.206155	D	NC	D	MD	2	-0.1	-0.1	NC	NC	AT2G32540	cellulose synthase family protein similar to cellulose synthase catalytic subunit from Arabidopsis thaliana [gi:5230423], cellulose synthase-5 from Zea mays [gi:9622882]
265680_at	AT2G32150	12	4		NC	NC	MC_I	944.2	849	896.6	P	P	0.000244	0.000244	1318.3	1136.4	1227.35	P	P	0.000244	0.000244	0.5	0.8	0.2	0.6	0.525	0.25	I	I	NC	I	3	-0.3	-0.2	NC	NC	AT2G32150	haloacid dehalogenase-like hydrolase family protein contains InterPro accession IPR005834: Haloacid dehalogenase-like hydrolase
263467_at	AT2G31730	12	4		NC	NC	MC_D	473.7	473.5	473.6	P	P	0.000244	0.000732	262.4	296.1	279.25	P	P	0.001221	0.000244	-0.9	-0.7	-0.6	-0.7	-0.725	0.125831	D	MD	D	NC	2	-0.1	-0.1	NC	NC	AT2G31730	ethylene-responsive protein, putative similar to ethylene-inducible ER33 protein [Lycopersicon esculentum] gi|5669656|gb|AAD46413
263446_at	AT2G31650	12	4		NC	NC	MC_I	307.1	325.6	316.35	P	P	0.008057	0.00415	408	444.3	426.15	P	P	0.00415	0.00293	0.3	0.3	0.6	0.6	0.45	0.173205	I	MI	I	I	3	0	0.3	NC	NC	AT2G31650	trithorax 1 (ATX-1) (TRX1) identical to trithorax-like protein 1 GI:12659210 from [Arabidopsis thaliana]; characterized in Alvarez-Venegas R,et al, ATX-1, an Arabidopsis Homolog of Trithorax, Activates Flower Homeotic Genes.(Curr Biol. 2003 Apr 15;13(8):
263426_at	AT2G31570	12	4		NC	NC	MC_D	13214.1	12707.4	12960.8	P	P	0.000244	0.000244	11026.7	9762.7	10394.7	P	P	0.000244	0.000244	-0.3	-0.2	-0.4	-0.3	-0.3	0.0816497	D	NC	D	D	3	-0.1	-0.1	NC	NC	AT2G31570	glutathione peroxidase, putative
266481_at	AT2G31070	12	4		NC	NC	MC_I	472.5	513.7	493.1	P	P	0.000244	0.000244	674.4	743.8	709.1	P	P	0.000244	0.000244	0.6	0.6	0.5	0.5	0.55	0.057735	I	I	I	MI	3	0	0	NC	NC	AT2G31070	TCP family transcription factor, putative similar to TCP1 protein (GI:20269127) {Lupinus albus} and cycloidea (GI:12002867) [Lycopersicon esculentum]
267196_at	AT2G30960;AT2G30950	12	4		NC	NC	MC_I	11086.1	11104.3	11095.2	P	P	0.000244	0.000244	14187.4	14570.4	14378.9	P	P	0.000244	0.000244	0.4	0.4	0.4	0.3	0.375	0.05	I	I	I	MI	3	0.1	-0.1	NC	NC	AT2G30960;AT2G30950	[AT2G30960, expressed protein];[AT2G30950, FtsH protease (VAR2) identical to zinc dependent protease VAR2 GI:7650138 from [Arabidopsis thaliana]]
267154_at	AT2G30870;AT2G30880	12	4		NC	NC	MC_D	25377.4	24602.3	24989.8	P	P	0.000732	0.000732	17783.9	20235.5	19009.7	P	P	0.000732	0.000732	-0.5	-0.6	-0.3	-0.3	-0.425	0.15	D	D	D	NC	3	0	0.2	NC	NC	AT2G30870;AT2G30880	[AT2G30870, glutathione S-transferase, putative supported by cDNA GI:443698 GB:D17673];[AT2G30880, pleckstrin homology (PH) domain-containing protein contains Pfam profile PF00169: PH domain]
267153_at	AT2G30860	12	4		NC	NC	MC_D	43487.7	51489.4	47488.6	P	P	0.000244	0.000244	37243.4	41823.5	39533.4	P	P	0.000244	0.000244	-0.2	-0.5	0	-0.3	-0.25	0.208167	D	D	NC	D	3	0.2	0.2	NC	NC	AT2G30860	glutathione S-transferase, putative identical to GB:Y12295
267496_at	AT2G30550	12	4		NC	NC	MC_D	1103.9	1347.4	1225.65	P	P	0.000732	0.000732	822.8	904.6	863.7	P	P	0.000244	0.000732	-0.5	-0.5	-0.5	-0.7	-0.55	0.1	D	NC	D	D	3	0.2	0.1	NC	NC	AT2G30550	lipase class 3 family protein similar to DEFECTIVE IN ANTHER DEHISCENCE1 [Arabidopsis thaliana] GI:16215706; contains Pfam profile PF01764: Lipase
267300_at	AT2G30140	12	4		NC	NC	MC_D	2627.1	2793.9	2710.5	P	P	0.000244	0.000244	1847.2	2081	1964.1	P	P	0.000244	0.000244	-0.5	-0.7	-0.3	-0.6	-0.525	0.170783	D	D	NC	D	3	0.2	0.2	NC	NC	AT2G30140	UDP-glucoronosyl/UDP-glucosyl transferase family protein contains Pfam profile: PF00201 UDP-glucoronosyl and UDP-glucosyl transferase
266296_at	AT2G29420	12	4		NC	NC	MC_I	4154.7	2998.5	3576.6	P	P	0.000244	0.000244	3939.4	4391.6	4165.5	P	P	0.000244	0.000244	0.2	0.3	0.4	0.6	0.375	0.170783	NC	I	I	I	1	-0.3	0.2	NC	NC	AT2G29420	glutathione S-transferase, putative
266279_at	AT2G29290	12	4	I	NC		MC_I	2161.5	1915	2038.25	P	P	0.000244	0.000244	3038.8	2780.9	2909.85	P	P	0.000244	0.000244	0.7	1.4	0.4	0.9	0.85	0.420317	I	I	I	I	4	-0.6	-0.2	D	NC	AT2G29290	tropinone reductase, putative / tropine dehydrogenase, putative similar to tropinone reductase SP:P50165 from [Datura stramonium]
266288_s_at	AT2G29140	12	4		NC	NC	MC_I	734.4	878.8	806.6	P	P	0.000244	0.000244	1059.9	1082	1070.95	P	P	0.000244	0.000244	0.5	0.3	0.5	0.4	0.425	0.0957427	I	I	I	NC	3	0.2	0.1	NC	NC	AT2G29140	pumilio/Puf RNA-binding domain-containing protein
266222_at	AT2G28780	12	4		NC	NC	MC_I	257	200.3	228.65	P	P	0.010742	0.023926	304.4	362.4	333.4	P	P	0.00415	0.001221	0.4	0.7	0.5	0.7	0.575	0.15	NC	I	I	I	1	-0.2	0.1	NC	NC	AT2G28780	expressed protein
266226_at	AT2G28740	12	4		NC	NC	MC_I	1164.3	863	1013.65	P	P	0.000732	0.000244	1475.3	1597.2	1536.25	P	P	0.000244	0.000244	0.3	0.6	0.3	0.5	0.425	0.15	I	I	NC	I	3	-0.2	-0.1	NC	NC	AT2G28740	histone H4 identical to histone H4 from Lycopersicon esculentum GI:297150, Lolium temulentum SP|P02308, Acropora formosa GI:455652, Citrus jambhiri GI:16797797
263443_at	AT2G28630	12	4		NC	NC	MC_I	884.5	693.7	789.1	P	P	0.000244	0.000732	1127.3	1142	1134.65	P	P	0.000244	0.000732	0.4	0.7	0.5	0.7	0.575	0.15	I	I	NC	I	3	-0.2	0	NC	NC	AT2G28630	beta-ketoacyl-CoA synthase family protein
265547_at	AT2G28305	12	4	I	NC		MC_I	334.2	252.8	293.5	P	P	0.001953	0.01416	520.4	475.2	497.8	P	P	0.000244	0.000732	0.8	0.9	0.4	1	0.775	0.262996	I	I	I	I	4	-0.4	-0.1	D	NC	AT2G28305	expressed protein contains Pfam profile PF03641: decarboxylase family protein
265542_at	AT2G28290	12	4		NC	NC	MC_I	894.2	700.5	797.35	P	P	0.001221	0.000732	900.8	1043.5	972.15	P	P	0.000244	0.000244	0.4	0.4	0.4	0.5	0.425	0.05	I	NC	I	MI	2	0.1	0.1	NC	NC	AT2G28290	chromatin remodeling protein, putative (SYD) similar to transcriptional activator HBRM [Homo sapiens] GI:414117; contains Pfam profiles PF00271: Helicase conserved C-terminal domain, PF00176: SNF2 family N-terminal domain; identical to cDNA putative chro
266206_at	AT2G27730	12	4		NC	NC	MC_D	7076.6	7845.1	7460.85	P	P	0.000244	0.000244	5882.3	5168.7	5525.5	P	P	0.000244	0.000244	-0.2	-0.4	-0.3	-0.5	-0.35	0.129099	NC	D	D	D	1	0.2	-0.1	NC	NC	AT2G27730	expressed protein contains 1 transmembrane domain; similar to Unknown mitochondrial protein At2g27730 (Swiss-Prot:Q9ZUX4) [Arabidopsis thaliana] similar to F1F0-ATPase inhibitor protein (GI:5821432) [Oryza sativa]
266302_at	AT2G27050	12	4		NC	NC	MC_I	1199.7	1065.4	1132.55	P	P	0.000244	0.000244	1593.1	1413.6	1503.35	P	P	0.000244	0.000244	0.4	0.5	0.3	0.4	0.4	0.0816497	I	I	NC	I	3	-0.1	-0.1	NC	NC	AT2G27050	ethylene-insensitive3-like1 (EIL1) identical to ethylene-insensitive3-like1 GI:2224927 from [Arabidopsis thaliana]
266313_at	AT2G26980	12	4	I	NC		MC_I	1160.1	929.3	1044.7	P	P	0.00293	0.001953	1779.5	1979	1879.25	P	P	0.001221	0.000732	0.6	1	0.6	1	0.8	0.23094	I	I	I	I	4	-0.5	0.2	D	NC	AT2G26980	CBL-interacting protein kinase 3 (CIPK3) identical to CBL-interacting protein kinase 3 [Arabidopsis thaliana] gi|9280638|gb|AAF86507
245052_at	AT2G26440	12	4	D	NC		MC_D	3102.7	4523.1	3812.9	P	P	0.000244	0.000244	1304.7	1386.6	1345.65	P	P	0.000244	0.000244	-1.3	-1.8	-1.2	-1.8	-1.525	0.320156	D	D	D	D	4	0.5	0	I	NC	AT2G26440	pectinesterase family protein contains Pfam profile: PF01095 pectinesterase
257365_x_at	AT2G26020	12	4	D		NC	MC_D	29040.7	23956.2	26498.5	P	P	0.000244	0.000244	10148.1	12975.4	11561.8	P	P	0.000244	0.000244	-1.1	-1.3	-0.9	-0.9	-1.05	0.191485	D	D	D	D	4	0.2	0.3	NC	I	AT2G26020	plant defensin-fusion protein, putative (PDF1.2b) plant defensin protein family member, personal communication, Bart Thomma (Bart.Thomma@agr.kuleuven.ac.be); similar to antifungal protein 1 preprotein [Raphanus sativus] gi|609322|gb|AAA69541
266656_at	AT2G25900	12	4	I	NC		MC_I	1460.9	965.6	1213.25	P	P	0.001953	0.001953	2244.6	1910.7	2077.65	P	P	0.000244	0.000244	0.7	1.3	0.5	1.1	0.9	0.365148	I	I	I	I	4	-0.5	0	D	NC	AT2G25900	zinc finger (CCCH-type) family protein contains Pfam domain, PF00642: Zinc finger C-x8-C-x5-C-x3-H type (and similar)
266678_at	AT2G25870	12	4		NC	NC	MC_I	1820.1	1909.1	1864.6	P	P	0.000244	0.000732	2760.7	2883.7	2822.2	P	P	0.000244	0.000244	0.6	0.3	0.6	0.3	0.45	0.173205	I	I	I	NC	3	0.3	0	NC	NC	AT2G25870	haloacid dehalogenase-like hydrolase family protein contains Pfam profiles PF00702: haloacid dehalogenase-like hydrolase, PF02130: Uncharacterized protein family UPF0054
265896_at	AT2G25660	12	4		NC	NC	MC_I	380	357.6	368.8	P	P	0.018555	0.008057	511.7	545.7	528.7	P	P	0.008057	0.00415	0.5	0.5	0.7	0.7	0.6	0.11547	MI	NC	I	I	1	0.1	0	NC	NC	AT2G25660	expressed protein
264381_at	AT2G25100	12	4		NC	NC	MC_I	449.9	487	468.45	P	P	0.000244	0.001953	647	600.3	623.65	P	P	0.000244	0.000244	0.4	0.4	0.5	0.4	0.425	0.05	I	NC	I	MI	2	0.1	0.1	NC	NC	AT2G25100	ribonuclease HII family protein contains Pfam profile: PF01351 ribonuclease HII
263534_at	AT2G24945;AT2G24940	12	4		NC	NC	MC_D	11640.4	9811.5	10726	P	P	0.000244	0.000244	8028.7	7411.7	7720.2	P	P	0.000244	0.000244	-0.5	-0.3	-0.6	-0.4	-0.45	0.129099	D	NC	D	D	3	-0.1	-0.1	NC	NC	AT2G24945;AT2G24940	[AT2G24945, expressed protein];[AT2G24940, cytochrome b5 domain-containing protein similar to SP|P70580 Membrane associated progesterone receptor component 1 {Rattus norvegicus}; contains Pfam profile PF00173: Heme/Steroid binding domain]
265996_at	AT2G24200	12	4		NC	NC	MC_D	17180.5	20255.4	18718	P	P	0.000244	0.000244	11932.7	14620.1	13276.4	P	P	0.000244	0.000244	-0.3	-0.7	-0.2	-0.4	-0.4	0.216025	D	D	NC	D	3	0.3	0.2	NC	NC	AT2G24200	cytosol aminopeptidase identical to cytosol aminopeptidase SP:P30184 from [Arabidopsis thaliana]; contains Pfam profiles: PF00883 cytosol aminopeptidase family catalytic domain, PF02789: cytosol aminopeptidase family N-terminal domain
266000_at	AT2G24180	12	4		NC	NC	MC_D	3434.3	3322.3	3378.3	P	P	0.000244	0.000244	2530	2623.6	2576.8	P	P	0.000244	0.000244	-0.3	-0.3	-0.3	-0.3	-0.3	0	NC	D	D	D	1	0.1	-0.1	NC	NC	AT2G24180	cytochrome P450 family protein
265991_at	AT2G24120	12	4		NC	NC	MC_I	525	664.6	594.8	P	P	0.000244	0.000732	747.4	640.4	693.9	P	P	0.000244	0.000244	0.6	0.2	0.6	0.4	0.45	0.191485	I	NC	I	MI	2	0.3	0.1	NC	NC	AT2G24120	DNA-directed RNA polymerase, chloroplast (RPOPT) identical to SP|O24600 DNA-directed RNA polymerase, chloroplast precursor (EC 2.7.7.6) {Arabidopsis thaliana}
266566_at	AT2G24040	12	4		NC	NC	MC_D	1034.3	891.7	963	P	P	0.000244	0.000244	878.7	554.6	716.65	P	P	0.000244	0.000244	-0.4	-0.3	-0.7	-0.6	-0.5	0.182574	D	NC	D	D	3	0	-0.4	NC	NC	AT2G24040	hydrophobic protein, putative / low temperature and salt responsive protein, putative similar to SP|Q9ZNQ7 Hydrophobic protein RCI2A (Low temperature and salt responsive protein LTI6A) {Arabidopsis thaliana}; contains Pfam profile PF01679: Uncharacterize
267298_at	AT2G23760	12	4		NC	NC	MC_I	460.5	452.5	456.5	P	P	0.001221	0.000732	642.2	547.7	594.95	P	P	0.000244	0.000732	0.6	0.7	0.4	0.4	0.525	0.15	I	I	MI	NC	2	0	-0.1	NC	NC	AT2G23760	BEL1-like homeobox 4 protein (BLH4)
267126_s_at	AT2G23590	12	4		NC	NC	MC_D	1048.3	799.6	923.95	P	P	0.000732	0.000244	624.8	587.9	606.35	P	P	0.000244	0.000732	-0.6	-0.4	-0.6	-0.4	-0.5	0.11547	D	D	D	NC	3	-0.3	0	NC	NC	AT2G23590	hydrolase, alpha/beta fold family protein similar to ethylene-induced esterase [Citrus sinensis] GI:14279437, polyneuridine aldehyde esterase [Rauvolfia serpentina] GI:6651393; contains Pfam profile PF00561: hydrolase, alpha/beta fold family
267130_at	AT2G23390	12	4		NC	NC	MC_I	1402.3	1293.6	1347.95	P	P	0.000244	0.000732	2065.2	1813.8	1939.5	P	P	0.000244	0.000244	0.5	0.4	0.3	0.4	0.4	0.0816497	I	I	NC	I	3	0	-0.1	NC	NC	AT2G23390	expressed protein
267262_at	AT2G22990	12	4	I	NC		MC_I	3819.2	2422.9	3121.05	P	P	0.000244	0.000244	5307.9	5091.9	5199.9	P	P	0.000244	0.000244	0.6	1	0.5	0.9	0.75	0.238048	I	I	I	I	4	-0.3	-0.1	D	NC	AT2G22990	sinapoylglucose:malate sinapoyltransferase (SNG1) similar to serine carboxypeptidase I precursor (SP:P37890) [Oryza sativa]; contains Pfam profile PF00450: Serine carboxypeptidase; identical to cDNA sinapoylglucose:malate sinapoyltransferase (SNG1) GI:86
267265_at	AT2G22980	12	4	I	NC		MC_I	1941.5	1128.7	1535.1	P	P	0.001953	0.001953	2528.5	2915.3	2721.9	P	P	0.001953	0.001221	0.4	0.8	0.5	0.8	0.625	0.206155	I	I	I	I	4	-0.4	0	D	NC	AT2G22980	serine carboxypeptidase S10 family protein similar to serine carboxypeptidase I precursor (SP:P37890) from [Oryza sativa]
266457_at	AT2G22780	12	4		NC	NC	MC_D	3675.1	4700.5	4187.8	P	P	0.000244	0.000244	3368.2	2932.6	3150.4	P	P	0.000244	0.000244	-0.3	-0.5	-0.4	-0.7	-0.475	0.170783	MD	D	D	D	1	0.3	-0.1	NC	NC	AT2G22780	malate dehydrogenase, glyoxysomal, putative strong similarity to glyoxysomal malate dehydrogenase (EC 1.1.1.37) SP|P19446 {Citrullus lanatus}, SP|P46488 {Cucumis sativus}, [Medicago sativa] GI:2827078, SP|Q42972 {Oryza sativa}, SP|Q9ZP05 {Arabidopsis tha
264004_at	AT2G22425	12	4		NC	NC	MC_D	4201.4	4488.3	4344.85	P	P	0.000244	0.000244	3229.2	3392.9	3311.05	P	P	0.000244	0.000244	-0.4	-0.5	-0.3	-0.4	-0.4	0.0816497	D	D	D	MD	3	0.2	0.2	NC	NC	AT2G22425	expressed protein weak similarity to Swiss-Prot:Q9Y6A9 microsomal signal peptidase 12 kDa subunit (SPase 12 kDa subunit, SPC12, HSPC033) [Homo sapiens]
264001_at	AT2G22420	12	4		NC	NC	MC_I	430.3	411.4	420.85	P	P	0.000244	0.000732	583.8	547.4	565.6	P	P	0.000244	0.000244	0.3	0.4	0.4	0.6	0.425	0.125831	I	I	NC	I	3	-0.1	0	NC	NC	AT2G22420	peroxidase 17 (PER17) (P17) identical to SP|Q9SJZ2 Peroxidase 17 precursor (EC 1.11.1.7) (Atperox P17) (ATP25a) {Arabidopsis thaliana}
263548_at	AT2G21660	12	4		NC	NC	MC_D	20859.7	23887.7	22373.7	P	P	0.000244	0.000244	18149.4	19322.5	18736	P	P	0.000244	0.000244	-0.2	-0.4	0	-0.3	-0.225	0.170783	D	D	NC	D	3	0.2	0.2	NC	NC	AT2G21660	glycine-rich RNA-binding protein (GRP7) SP|Q03250 Glycine-rich RNA-binding protein 7 {Arabidopsis thaliana}
263763_at	AT2G21385	12	4		NC	NC	MC_I	1234.1	1167.3	1200.7	P	P	0.000732	0.000732	1670.4	1461.7	1566.05	P	P	0.000244	0.000732	0.4	0.5	0.3	0.4	0.4	0.0816497	I	I	NC	I	3	-0.1	-0.2	NC	NC	AT2G21385	expressed protein
263371_at	AT2G20490	12	4		NC	NC	MC_I	3170.1	2999.8	3084.95	P	P	0.000244	0.000244	3832.7	3733.8	3783.25	P	P	0.000244	0.000732	0.2	0.4	0.2	0.3	0.275	0.0957427	MI	I	NC	I	1	-0.1	0	NC	NC	AT2G20490	nucleolar RNA-binding Nop10p family protein similar to Nop10p (GI:8096260) [Homo sapiens]
266693_at	AT2G19800	12	4		NC	NC	MC_D	1441.7	1298.9	1370.3	P	P	0.000244	0.000244	1237.6	1190.5	1214.05	P	P	0.000244	0.000244	-0.3	-0.3	-0.5	-0.4	-0.375	0.0957427	D	NC	D	D	3	-0.1	-0.2	NC	NC	AT2G19800	expressed protein similar to myo-inositol oxygenase [Sus scrofa] gi|17432544|gb|AAL39076
265946_s_at	AT2G19520	12	4		NC	NC	MC_I	1433	1214.3	1323.65	P	P	0.000732	0.000732	1874.7	1655.2	1764.95	P	P	0.000244	0.000732	0.3	0.5	0.3	0.3	0.35	0.1	I	I	NC	I	3	0	0	NC	NC	AT2G19520	WD-40 repeat protein (MSI4) contains 6 (4 significant) WD-40 repeats (PF0400); identical to WD-40 repeat protein MSI4 (SP:O22607) [Arabidopsis thaliana]
266071_at	AT2G18680	11	4	I		NC	MC_I	258.3	239.2	248.75	P	P	0.01416	0.01416	381.5	580.5	481	P	P	0.001221	0.000244	0.8	0.9	1.1	1.2	1	0.182574	I	I	I	I	4	0.1	0.5	NC	I	AT2G18680	expressed protein
265340_at	AT2G18330	12	4		NC	NC	MC_I	563.8	657.8	610.8	P	P	0.000244	0.000244	805.9	914.5	860.2	P	P	0.000244	0.000244	0.4	0.2	0.6	0.5	0.425	0.170783	MI	NC	I	I	1	0.1	0.1	NC	NC	AT2G18330	AAA-type ATPase family protein contains Pfam profile: PF00004 ATPase family associated with various cellular activities (AAA)
263074_at	AT2G17560	12	4		NC	NC	MC_I	1779.8	1023	1401.4	P	P	0.000244	0.000244	2546.6	2013.1	2279.85	P	P	0.000244	0.000244	0.5	0.8	0.3	0.5	0.525	0.206155	I	I	NC	I	3	-0.3	-0.2	NC	NC	AT2G17560	high mobility group protein gamma (HMGgamma) / HMG protein gamma nearly identical to HMG protein (HMGgamma) [Arabidopsis thaliana] GI:2832355
264855_at	AT2G17265	12	4		NC	NC	MC_D	1728.9	1967.6	1848.25	P	P	0.000244	0.000244	1286.4	1607.8	1447.1	P	P	0.000244	0.000244	-0.4	-0.6	-0.2	-0.5	-0.425	0.170783	D	D	NC	D	3	0.2	0.2	NC	NC	AT2G17265	homoserine kinase (HSK) identical to homoserine kinase [Arabidopsis thaliana] gi|4927412|gb|AAD33097
265357_at	AT2G16740	12	4		NC	NC	MC_D	2417.5	2711.1	2564.3	P	P	0.000244	0.000244	2108.1	1998.6	2053.35	P	P	0.000244	0.000244	-0.3	-0.3	-0.4	-0.3	-0.325	0.05	D	D	D	NC	3	-0.1	0	NC	NC	AT2G16740	ubiquitin-conjugating enzyme, putative strong similarity to SP|P35133 Ubiquitin-conjugating enzyme E2-17 kDa 10 (EC 6.3.2.19) (Ubiquitin- protein ligase 10) (Ubiquitin carrier protein 10) {Arabidopsis thaliana}; contains Pfam profile PF00179: Ubiquitin-c
263267_at	AT2G16510	12	4		NC	NC	MC_D	9427.1	9391.3	9409.2	P	P	0.000244	0.000244	7870.2	7263.4	7566.8	P	P	0.000244	0.000244	-0.2	-0.3	-0.3	-0.4	-0.3	0.0816497	D	D	NC	D	3	0	0	NC	NC	AT2G16510	vacuolar ATP synthase 16 kDa proteolipid subunit 5 / V-ATPase 16 kDa proteolipid subunit 5 (AVAP5) identical to SP|P59227 Vacuolar ATP synthase 16 kDa proteolipid subunit 1/3/5 (EC 3.6.3.14) (V-ATPase 16 kDa proteolipid subunit 1/3/5) {Arabidopsis thalia
263098_at	AT2G16005	12	4	D		NC	MC_D	2096.5	2576.8	2336.65	P	P	0.000244	0.000244	818	431.6	624.8	P	P	0.001221	0.005859	-1.3	-1.4	-2.3	-2.3	-1.825	0.55	D	D	D	D	4	0.2	-1	NC	D	AT2G16005	MD-2-related lipid recognition domain-containing protein / ML domain-containing protein contains Pfam profile PF02221: ML domain
265478_at	AT2G15890	12	4	I	NC		MC_I	4038	3320.5	3679.25	P	P	0.000244	0.000244	5464	6319.4	5891.7	P	P	0.000244	0.000244	0.3	0.7	0.6	0.9	0.625	0.25	I	I	I	I	4	-0.4	0.2	D	NC	AT2G15890	expressed protein
265479_at	AT2G15760	12	4		NC	NC	MC_D	476.4	567.3	521.85	P	P	0.00293	0.005859	300.8	412.8	356.8	P	P	0.008057	0.018555	-0.4	-1	-0.1	-0.6	-0.525	0.377492	MD	D	NC	D	1	0.3	0.6	NC	NC	AT2G15760	calmodulin-binding protein similar to AR781 GI:1669593 from [Arabidopsis thaliana]; AR781 complements pheromone receptor deficient mutant of Shizosaccharomyces pombe
265475_at	AT2G15620	12	4		NC	NC	MC_I	9708.3	9520.5	9614.4	P	P	0.000244	0.000244	11670.2	11692.3	11681.2	P	P	0.000244	0.000244	0.3	0.3	0.2	0.3	0.275	0.05	I	I	NC	I	3	0	0	NC	NC	AT2G15620	ferredoxin--nitrite reductase, putative strong similarity to ferredoxin--nitrite reductase [Nicotiana tabacum] GI:19893; contains Pfam profiles PF03460: Nitrite/Sulfite reductase ferredoxin-like half domain, PF01077: Nitrite and sulphite reductase 4Fe-4S
265501_at	AT2G15490	11	4		NC	NC	MC_I	144	125.5	134.75	P	P	0.008057	0.01416	396.8	294.6	345.7	P	P	0.001953	0.00415	1.2	1.4	1.3	1.3	1.3	0.0816497	I	I	I	NC	3	-0.3	0.1	NC	NC	AT2G15490	UDP-glucoronosyl/UDP-glucosyl transferase family protein contains Pfam profile: PF00201 UDP-glucoronosyl and UDP-glucosyl transferase
263565_at	AT2G15390	12	4		NC	NC	MC_D	512.2	382.7	447.45	P	P	0.000244	0.001221	265.4	297.6	281.5	P	P	0.00293	0.000244	-0.7	-0.6	-0.7	-0.5	-0.625	0.0957427	D	MD	D	NC	2	-0.2	0	NC	NC	AT2G15390	xyloglucan fucosyltransferase, putative (FUT4) identical to SP|Q9SJP2 Probable fucosyltransferase 4 (EC 2.4.1.-) (AtFUT4) {Arabidopsis thaliana}; similar to SP|Q9SWH5 Galactoside 2-alpha-L-fucosyltransferase (EC 2.4.1.69) (Xyloglucan alpha-(1,2)-fucosylt
266385_at	AT2G14610	12	4	D	NC		MC_D	12094.5	9478.8	10786.6	P	P	0.000244	0.000244	2597.9	2995	2796.45	P	P	0.000244	0.000244	-2.1	-1.8	-1.9	-1.6	-1.85	0.208167	D	D	D	D	4	-0.3	0.3	D	NC	AT2G14610	pathogenesis-related protein 1 (PR-1) identical to GB:M90508 SP|P33154
263053_at	AT2G13440	12	4		NC	NC	MC_I	450.1	542.7	496.4	P	P	0.000244	0.000732	629.1	552.5	590.8	P	P	0.000244	0.000244	0.4	0.4	0.4	0.5	0.425	0.05	NC	I	I	I	1	0	0	NC	NC	AT2G13440	glucose-inhibited division family A protein similar to GidA from Pseudomonas syringae [GI:10764670]; contains Pfam profile PF01134 Glucose inhibited division protein A
266038_at	AT2G07680	12	4		NC	NC	MC_I	228.5	224	226.25	P	P	0.001221	0.010742	321.1	321.7	321.4	P	P	0.000244	0.00293	0.6	0.9	0.7	0.9	0.775	0.15	MI	I	NC	I	1	-0.3	0.1	NC	NC	AT2G07680	ABC transporter family protein
263348_at	AT2G05710	12	4		NC	NC	MC_D	11762.9	12918.6	12340.8	P	P	0.000244	0.000244	9357	10312.9	9834.95	P	P	0.000244	0.000244	-0.3	-0.5	-0.1	-0.3	-0.3	0.163299	D	D	NC	D	3	0.1	0.1	NC	NC	AT2G05710	aconitate hydratase, cytoplasmic, putative / citrate hydro-lyase/aconitase, putative nearly identical to SP|P49608 Aconitate hydratase, cytoplasmic (EC 4.2.1.3) (Citrate hydro-lyase) (Aconitase) {Cucurbita maxima}; contains Pfam profiles PF00330: Aconita
265561_s_at	AT2G05510	12	4	D	NC		MC_D	4808.1	4132.4	4470.25	P	P	0.000244	0.000244	2744	2718.8	2731.4	P	P	0.000244	0.000244	-0.8	-0.4	-0.9	-0.7	-0.7	0.216025	D	D	D	D	4	-0.3	-0.1	D	NC	AT2G05510	glycine-rich protein
263864_at	AT2G04530	12	4		NC	NC	MC_I	769.5	953.4	861.45	P	P	0.000244	0.000244	1371.9	1695.3	1533.6	P	P	0.000244	0.000244	0.6	0.2	0.8	0.4	0.5	0.258199	I	NC	I	I	3	0.2	0.3	NC	NC	AT2G04530	RNase Z 97% identical to RNase Z (GI:20975607) [Arabidopsis thaliana]; similar to RNase Z (GI:20975609) [Arabidopsis thaliana]; identical to cDNA RNase Z (At2g04530) GI:20975606
263404_s_at	AT2G04100	12	4		NC	NC	MC_D	751.8	752.2	752	P	P	0.000244	0.000244	512.5	487.6	500.05	P	P	0.000732	0.000244	-0.4	-0.6	-0.4	-0.6	-0.5	0.11547	NC	D	D	D	1	0.3	0.1	NC	NC	AT2G04100	MATE efflux family protein similar to ripening regulated protein DDTFR18 [Lycopersicon esculentum] GI:12231296; contains Pfam profile PF01554: Uncharacterized membrane protein family
264031_at	AT2G03780	12	4	I	NC		MC_I	644.3	454.5	549.4	P	P	0.000732	0.001221	847.2	803.8	825.5	P	P	0.000244	0.000732	0.4	0.8	0.3	0.8	0.575	0.262996	I	I	I	I	4	-0.4	-0.1	D	NC	AT2G03780	translin family protein similar to SP|Q99598 Translin-associated protein X (Translin-associated factor X) {Homo sapiens}; contains Pfam profile PF01997: Translin family
266743_at	AT2G02990	9	4	D		NC	MC_D	779	921.2	850.1	P	P	0.000732	0.000732	213.2	507.7	360.45	P	P	0.046143	0.010742	-1.9	-2.2	-0.6	-1	-1.425	0.75	D	D	D	D	4	0.4	1.3	NC	I	AT2G02990	ribonuclease 1 (RNS1) identical to ribonuclease SP:P42813 Ribonuclease 1 precursor (EC 3.1.27.1) {Arabidopsis thaliana}, GI:561998 from [Arabidopsis thaliana]
267239_at	AT2G02510	12	4		NC	NC	MC_D	6505.5	5543.1	6024.3	P	P	0.000244	0.000244	4307.9	5108.7	4708.3	P	P	0.000244	0.000244	-0.3	-0.4	-0.5	-0.4	-0.4	0.0816497	D	NC	D	D	3	0	-0.1	NC	NC	AT2G02510	expressed protein
266118_at	AT2G02130	12	4		NC	NC	MC_D	10744.4	10734.9	10739.6	P	P	0.000244	0.000244	9278.4	9171.6	9225	P	P	0.000244	0.000244	-0.2	-0.3	-0.4	-0.3	-0.3	0.0816497	D	NC	D	MD	2	0	-0.1	NC	NC	AT2G02130	plant defensin-fusion protein, putative (PDF2.3) plant defensin protein family member, personal communication, Bart Thomma (Bart.Thomma@agr.kuleuven.ac.be)
266122_at	AT2G02090	12	4		NC	NC	MC_I	706.6	632.9	669.75	P	P	0.000732	0.001221	849.7	673.8	761.75	P	P	0.000244	0.000244	0.2	0.3	0.3	0.4	0.3	0.0816497	I	I	NC	I	3	0.1	0.1	NC	NC	AT2G02090	SNF2 domain-containing protein / helicase domain-containing protein similar to transcriptional activator SRCAP [Homo sapiens] GI:5106572; contains Pfam profiles PF00271: Helicase conserved C-terminal domain, PF00176: SNF2 family N-terminal domain
263305_at	AT2G01930	12	4		NC	NC	MC_I	173	153.2	163.1	P	P	0.018555	0.037598	339.5	217.7	278.6	P	P	0.008057	0.00415	0.4	0.6	0.5	0.6	0.525	0.0957427	I	I	NC	I	3	0	-0.2	NC	NC	AT2G01930	expressed protein
266342_at	AT2G01540	12	4		NC	NC	MC_D	2298.4	2012.9	2155.65	P	P	0.000244	0.000732	1460.7	1819	1639.85	P	P	0.000732	0.000732	-0.6	-0.5	-0.4	-0.2	-0.425	0.170783	D	D	D	NC	3	-0.1	0.2	NC	NC	AT2G01540	C2 domain-containing protein similar to zinc finger and C2 domain protein GI:9957238 from [Arabidopsis thaliana]
261887_at	AT1G80780	12	4		NC	NC	MC_I	2187.4	2365.6	2276.5	P	P	0.000244	0.000244	3055.8	3181.9	3118.85	P	P	0.000244	0.000244	0.3	0.4	0.3	0.4	0.35	0.057735	I	I	NC	I	3	-0.1	0.1	NC	NC	AT1G80780	CCR4-NOT transcription complex protein, putative similar to SWISS-PROT:Q60809 CCR4-NOT transcription complex, subunit 7 (CCR4-associated factor 1, (CAF1) [Mus musculus]
261882_at	AT1G80770	12	4		NC	NC	MC_I	839.7	827.7	833.7	P	P	0.001953	0.001953	1073.8	1236.5	1155.15	P	P	0.001221	0.000732	0.4	0.2	0.5	0.5	0.4	0.141421	I	I	I	NC	3	0	0	NC	NC	AT1G80770	expressed protein
259861_at	AT1G80620	12	4		NC	NC	MC_I	824.7	970.3	897.5	P	P	0.00293	0.000244	1025.3	1035.4	1030.35	P	P	0.000244	0.000244	0.4	0.3	0.5	0.4	0.4	0.0816497	I	NC	I	I	3	0.2	0.1	NC	NC	AT1G80620	ribosomal protein S15 family protein similar to ribosomal protein S15 GB:AAD36415 from [Thermotoga maritima]
260284_at	AT1G80380	12	4		NC	NC	MC_I	6315.8	6447.6	6381.7	P	P	0.000244	0.000244	7101.6	8443.8	7772.7	P	P	0.000244	0.000244	0.4	0.5	0.4	0.4	0.425	0.05	I	I	NC	I	3	-0.1	0	NC	NC	AT1G80380	phosphoribulokinase/uridine kinase-related
260328_at	AT1G80360	12	4		NC	NC	MC_D	2277	2499.3	2388.15	P	P	0.000244	0.000244	1774	1896.9	1835.45	P	P	0.000244	0.000244	-0.3	-0.5	-0.2	-0.4	-0.35	0.129099	D	D	NC	D	3	0.2	0.1	NC	NC	AT1G80360	aminotransferase class I and II family protein low similarity to GI:14278621 Aromatic Aminotransferase from Pyrococcus horikoshii
262066_at	AT1G79950	12	4		NC	NC	MC_I	679	664.6	671.8	P	P	0.000244	0.001221	866.2	863.1	864.65	P	P	0.000244	0.000244	0.6	0.5	0.6	0.4	0.525	0.0957427	I	I	I	NC	3	0.1	-0.1	NC	NC	AT1G79950	helicase-related similar to BRCA1-binding helicase-like protein BACH1 (GI:13661819) Homo sapiens].; contains similarity to helicase-like protein NHL GI:6969265 from (Homo sapiens)
261403_at	AT1G79590	12	4		NC	NC	MC_D	2109.7	2364.2	2236.95	P	P	0.00293	0.000732	1787.9	2034.3	1911.1	P	P	0.001953	0.00293	-0.3	-0.5	-0.1	-0.4	-0.325	0.170783	D	D	NC	MD	2	0.2	0.2	NC	NC	AT1G79590	syntaxin 52 (SYP52) identical to Swiss-Prot:Q94KK7 syntaxin 52 (AtSYP52) [Arabidopsis thaliana]
264102_at	AT1G79270	12	4		NC	NC	MC_I	897.8	701.9	799.85	P	P	0.000244	0.000732	1246.2	1135	1190.6	P	P	0.000244	0.000244	0.5	0.8	0.4	0.7	0.6	0.182574	I	I	NC	I	3	-0.4	-0.2	NC	NC	AT1G79270	expressed protein contains Pfam profile PF04146: YT521-B-like family
264279_s_at	AT1G78820	12	4		NC	NC	MC_D	14351	11556.1	12953.5	P	P	0.000244	0.000244	9413.7	10642.9	10028.3	P	P	0.000244	0.000244	-0.4	-0.5	-0.3	-0.3	-0.375	0.0957427	D	D	D	NC	3	0	0.1	NC	NC	AT1G78820	curculin-like (mannose-binding) lectin family protein / PAN domain-containing protein similar to S locus glycoprotein [Brassica rapa] GI:12246840; contains Pfam profile PF01453: Lectin (probable mannose binding)
264293_at	AT1G78770	12	4		NC	NC	MC_I	241.5	412.3	326.9	P	P	0.000244	0.001953	613.7	561.1	587.4	P	P	0.000732	0.000732	1	0.4	1	0.6	0.75	0.3	I	NC	I	I	3	0.5	-0.1	NC	NC	AT1G78770	cell division cycle family protein similar to cell division cycle protein GI:603230 from [Homo sapiens]; contains Pfam profile PF00515 TPR Domain 148977 (apparently not full-length).
263130_at	AT1G78650	12	4		NC	NC	MC_I	374.9	364.6	369.75	P	P	0.000732	0.001221	706.7	465.6	586.15	P	P	0.000732	0.001953	0.6	0.6	0.5	0.5	0.55	0.057735	I	I	NC	I	3	-0.2	0.1	NC	NC	AT1G78650	expressed protein weak similarity to DNA polymerase delta subunit 3 (DNA polymerase delta subunit p66) (Swiss-Prot:Q15054) [Homo sapiens]
260803_at	AT1G78340	12	4		NC	NC	MC_I	670.5	418.7	544.6	P	P	0.000244	0.000244	829.2	778.5	803.85	P	P	0.000244	0.000732	0.4	0.9	0.5	0.8	0.65	0.238048	I	I	NC	I	3	-0.6	0	NC	NC	AT1G78340	glutathione S-transferase, putative similar to glutathione transferase GI:2853219 from [Carica papaya]
260774_at	AT1G78290	12	4		NC	NC	MC_I	640.5	592.5	616.5	P	P	0.001221	0.000244	809.3	627.7	718.5	P	P	0.000244	0.000244	0.5	0.9	0.1	0.5	0.5	0.326599	I	I	NC	I	3	-0.4	-0.5	NC	NC	AT1G78290	serine/threonine protein kinase, putative similar to serine-threonine protein kinase [Triticum aestivum] gi|2055374|gb|AAB58348
260056_at	AT1G78140	12	4		NC	NC	MC_I	1587	1698.2	1642.6	P	P	0.000244	0.000244	2067.1	1997.6	2032.35	P	P	0.000244	0.000244	0.4	0.3	0.4	0.3	0.35	0.057735	I	I	I	NC	3	0.1	0.1	NC	NC	AT1G78140	methyltransferase-related similar to Probable delta(24)-sterol C-methyltransferase (Swiss-Prot:O14321) [Schizosaccharomyces pombe]; similar to C5-O-methyltransferase (GI:5921167) [Streptomyces avermitilis]; similar to S-adenosyl-methionine-sterol-C- meth
259681_at	AT1G77760	12	4	I		NC	MC_I	8469	7759.3	8114.15	P	P	0.000244	0.000244	11793.6	14682	13237.8	P	P	0.000244	0.000244	0.5	0.6	0.7	0.9	0.675	0.170783	I	I	I	I	4	-0.2	0.3	NC	I	AT1G77760	nitrate reductase 1 (NR1) identical to SP|P11832 Nitrate reductase 1 (formerly EC 1.6.6.1) (NR1){Arabidopsis thaliana}
259732_at	AT1G77470	12	4		NC	NC	MC_I	740.5	855.9	798.2	P	P	0.000244	0.000732	1003.9	1207.2	1105.55	P	P	0.000244	0.000244	0.5	0.4	0.7	0.5	0.525	0.125831	I	MI	I	I	3	0.2	0.1	NC	NC	AT1G77470	replication factor C 36 kDA, putative similar to SWISS-PROT:P40937 activator 1 36 kDa subunit (Replication factor C 36 kDa subunit, A1 36 kDa subunit, RF-C 36 kDa subunit, RFC36) [Homo sapiens]
259705_at	AT1G77450	12	4		NC	NC	MC_I	1052.3	1140.9	1096.6	P	P	0.000244	0.001221	1448.9	1564.1	1506.5	P	P	0.000244	0.000244	0.5	0.4	0.7	0.5	0.525	0.125831	I	NC	I	I	3	0.3	0.1	NC	NC	AT1G77450	no apical meristem (NAM) family protein contains Pfam PF02365: No apical meristem (NAM) domain; similar to GRAB1 protein GB:CAA09371, a novel member of the NAC domain family
246384_at	AT1G77370	12	4		NC	NC	MC_D	3975.2	4141.5	4058.35	P	P	0.000244	0.000244	2924.4	2765.9	2845.15	P	P	0.000244	0.000244	-0.4	-0.5	-0.5	-0.4	-0.45	0.057735	D	D	MD	NC	2	0	0	NC	NC	AT1G77370	glutaredoxin, putative similar to glutaredoxin [Ricinus communis] gi|1732424|emb|CAA89699
259970_at	AT1G76570	12	4		NC	NC	MC_I	522.8	414.2	468.5	P	P	0.000244	0.000244	745.3	680.6	712.95	P	P	0.000244	0.000244	0.4	0.7	0.3	0.7	0.525	0.206155	NC	I	MI	I	1	-0.2	-0.1	NC	NC	AT1G76570	chlorophyll A-B binding family protein similar to chlorophyll A-B binding protein GB:P12470 [Nicotiana plumbaginifolia]; contains Pfam profile: PF00504 Chlorophyll A-B binding proteins
261725_at	AT1G76300	12	4		NC	NC	MC_I	975.5	973.6	974.55	P	P	0.000732	0.000732	1540.3	1277.4	1408.85	P	P	0.001221	0.000244	0.5	0.5	0.3	0.2	0.375	0.15	I	I	I	NC	3	0.1	-0.2	NC	NC	AT1G76300	small nuclear ribonucleoprotein D3, putative / snRNP core protein D3, putative / Sm protein D3, putative similar to SWISS-PROT:P43331 small nuclear ribonucleoprotein Sm D3 (snRNP core protein D3, Sm-D3) [Mouse]
261723_at	AT1G76200	12	4		NC	NC	MC_D	13628.9	12876.5	13252.7	P	P	0.000244	0.000244	10084.3	9370	9727.15	P	P	0.000244	0.000244	-0.3	-0.4	-0.3	-0.3	-0.325	0.05	D	NC	D	D	3	0.1	0	NC	NC	AT1G76200	expressed protein
261782_at	AT1G76110	11	4		NC	NC	MC_I	540.4	446.3	493.35	P	P	0.008057	0.030273	789.1	505.5	647.3	P	P	0.001953	0.005859	0.7	0.8	0.3	0.8	0.65	0.238048	I	I	NC	I	3	-0.3	-0.2	NC	NC	AT1G76110	high mobility group (HMG1/2) family protein / ARID/BRIGHT DNA-binding domain-containing protein low similarity to high mobility group protein [Plasmodium falciparum] GI:790198; contains Pfam profiles PF00505: HMG (high mobility group) box, PF01388: ARID/
262966_at	AT1G75760	12	4		NC	NC	MC_D	2042.1	2167	2104.55	P	P	0.000244	0.000244	1451.1	1821.1	1636.1	P	P	0.000244	0.000244	-0.5	-0.4	-0.4	-0.3	-0.4	0.0816497	D	D	D	MD	3	-0.1	0.1	NC	NC	AT1G75760	ER lumen protein retaining receptor family protein similar to SP|P33946 ER lumen protein retaining receptor 1 (KDEL receptor 1) {Bos taurus}; contains Pfam profile PF00810: ER lumen protein retaining receptor
262207_at	AT1G74850	12	4		NC	NC	MC_I	792.3	820.3	806.3	P	P	0.001953	0.001953	840.7	775.8	808.25	P	P	0.000732	0.000244	0.5	0.3	0.5	0.5	0.45	0.1	I	NC	I	I	3	0.2	0	NC	NC	AT1G74850	pentatricopeptide (PPR) repeat-containing protein contains Pfam profile PF01535: PPR repeat
262177_at	AT1G74710	12	4		NC	NC	MC_I	457.9	346	401.95	P	P	0.001221	0.00293	741.4	619.1	680.25	P	P	0.000244	0.000732	0.9	1.2	0.5	0.7	0.825	0.298608	I	I	NC	I	3	-0.3	-0.5	NC	NC	AT1G74710	isochorismate synthase 1 (ICS1) / isochorismate mutase identical to GI:17223087 and GB:AF078080; contains Pfam profile PF00425: chorismate binding enzyme; contains TIGRfam profile TIGR00543: isochorismate synthases; identical to cDNA isochorismate syntha
260258_at	AT1G74270	12	4		NC	NC	MC_D	7248.2	7246.5	7247.35	P	P	0.000244	0.000244	5960	5811	5885.5	P	P	0.000244	0.000244	-0.3	-0.2	-0.3	-0.3	-0.275	0.05	D	D	D	NC	3	0	-0.1	NC	NC	AT1G74270	60S ribosomal protein L35a (RPL35aC) similar to ribosomal protein L33B GB:NP_014877 from [Saccharomyces cerevisiae]
260254_at	AT1G74210	12	4		NC	NC	MC_D	1831.5	2034.2	1932.85	P	P	0.000244	0.000244	1531.1	1600.5	1565.8	P	P	0.000244	0.000732	-0.3	-0.4	-0.4	-0.5	-0.4	0.0816497	NC	D	D	D	1	0.2	-0.1	NC	NC	AT1G74210	glycerophosphoryl diester phosphodiesterase family protein low similarity to glycerophosphodiester phosphodiesterase [Borrelia hermsii] GI:1399038; contains Pfam profile PF03009: Glycerophosphoryl diester phosphodiesterase family
259903_at	AT1G74160	12	4		NC	NC	MC_I	356.5	256.2	306.35	P	P	0.00293	0.037598	529.3	556.2	542.75	P	P	0.001953	0.008057	0.6	0.9	0.4	0.7	0.65	0.208167	I	I	NC	I	3	-0.3	-0.2	NC	NC	AT1G74160	expressed protein
260387_at	AT1G74100	12	4		NC	NC	MC_D	6068.9	6521.7	6295.3	P	P	0.000244	0.000244	4480.6	5001.2	4740.9	P	P	0.000244	0.000244	-0.4	-0.6	-0.2	-0.4	-0.4	0.163299	D	D	NC	D	3	0.2	0.2	NC	NC	AT1G74100	sulfotransferase family protein similar to SP|P52837 Flavonol 4'-sulfotransferase (EC 2.8.2.-) (F4-ST) {Flaveria chloraefolia}; contains Pfam profile PF00685: Sulfotransferase domain
245721_s_at	AT1G73460;AT1G73450	12	4		NC	NC	MC_I	458.7	503.9	481.3	P	P	0.000732	0.001953	681.7	699.8	690.75	P	P	0.000244	0.000244	0.5	0.5	0.5	0.5	0.5	0	NC	I	I	I	1	-0.2	0.1	NC	NC	AT1G73460;AT1G73450	[AT1G73460, protein kinase family protein contains protein kinase domain Pfam:PF00069];[AT1G73450, protein kinase, putative similar to nuclear serine/threonine protein kinase GI:3582644 from [Rattus norvegicus]]
262382_at	AT1G72920	12	4		NC	NC	MC_D	931.5	810.1	870.8	P	P	0.000244	0.000244	677.7	482.6	580.15	P	P	0.000244	0.000244	-0.4	-0.4	-0.8	-0.5	-0.525	0.189297	D	NC	D	D	3	-0.1	-0.2	NC	NC	AT1G72920	disease resistance protein (TIR-NBS class), putative domain signature TIR-NBS exists, suggestive of a disease resistance protein.
262378_at	AT1G72830	12	4		NC	NC	MC_D	936.1	1091.7	1013.9	P	P	0.001221	0.001221	660.1	760.6	710.35	P	P	0.001221	0.001221	-0.4	-0.7	-0.2	-0.5	-0.45	0.208167	D	D	NC	D	3	0.4	0.3	NC	NC	AT1G72830	CCAAT-binding transcription factor (CBF-B/NF-YA) family protein contains Pfam profile: PF02045 CCAAT-binding transcription factor (CBF-B/NF-YA) subunit B
262355_at	AT1G72820	12	4		NC	NC	MC_I	1139.3	1283.4	1211.35	P	P	0.000244	0.000244	1421.8	1360.9	1391.35	P	P	0.000244	0.000244	0.4	0.4	0.4	0.4	0.4	0	MI	I	I	I	1	-0.1	0	NC	NC	AT1G72820	mitochondrial substrate carrier family protein contains Pfam profile: PF00153 mitochondrial carrier protein
259922_at	AT1G72770	12	4		NC	NC	MC_I	1272.1	1257.8	1264.95	P	P	0.000732	0.001953	1572.5	1241	1406.75	P	P	0.000732	0.000732	0.4	0.6	0.3	0.4	0.425	0.125831	I	I	NC	I	3	-0.1	-0.2	NC	NC	AT1G72770	protein phosphatase 2C P2C-HA / PP2C P2C-HA (P2C-HA) identical to protein phosphatase 2C (AtP2C-HA) GB:AJ003119 [Arabidopsis thaliana] (Plant Mol. Biol. 38 (5), 879-883 (1998))
256344_at	AT1G72050	12	4		NC	NC	MC_I	1212.2	918.4	1065.3	P	P	0.001953	0.005859	1564.6	1474.7	1519.65	P	P	0.000732	0.000732	0.3	0.6	0.3	0.5	0.425	0.15	MI	I	NC	I	1	-0.2	-0.1	NC	NC	AT1G72050	zinc finger (C2H2 type) family protein contains multiple zinc finger domains: PF00096: Zinc finger, C2H2 type
261522_at	AT1G71710	12	4		NC	NC	MC_I	613.1	580.3	596.7	P	P	0.000244	0.000732	910.8	765.5	838.15	P	P	0.000244	0.000732	0.6	0.7	0.4	0.3	0.5	0.182574	I	I	NC	I	3	-0.2	-0.1	NC	NC	AT1G71710	inositol polyphosphate 5-phosphatase, putative similar to inositol polyphosphate 5-phosphatase I [Arabidopsis thaliana] GI:10444261
259896_at	AT1G71500	12	4		NC	NC	MC_I	5438.5	4661.5	5050	P	P	0.000244	0.000244	6981.6	7059	7020.3	P	P	0.000244	0.000244	0.3	0.4	0.2	0.4	0.325	0.0957427	I	I	NC	I	3	-0.3	-0.1	NC	NC	AT1G71500	Rieske [2Fe-2S] domain-containing protein contains Pfam profile PF00355: iron-sulfur cluster-binding protein, rieske family
259945_at	AT1G71460	12	4		NC	NC	MC_I	441.5	328.1	384.8	P	P	0.00415	0.00293	488.9	555.7	522.3	P	P	0.000732	0.001221	0.4	0.6	0.7	0.3	0.5	0.182574	I	NC	I	I	3	0.1	0.3	NC	NC	AT1G71460	pentatricopeptide (PPR) repeat-containing protein contains Pfam profile PF01535: PPR repeat
259942_at	AT1G71260	12	4		NC	NC	MC_I	1792.6	1849.3	1820.95	P	P	0.000732	0.001221	2463.5	2293.9	2378.7	P	P	0.000732	0.001953	0.3	0.5	0.3	0.6	0.425	0.15	I	I	NC	MI	2	-0.2	0	NC	NC	AT1G71260	expressed protein
260308_at	AT1G70610	12	4		NC	NC	MC_I	448.6	515.2	481.9	P	P	0.000244	0.000244	775.8	743.5	759.65	P	P	0.000732	0.000244	0.7	0.6	0.4	0.5	0.55	0.129099	NC	I	I	I	1	0	0	NC	NC	AT1G70610	ABC transporter (TAP1) contains Pfam profile: PF00005 ABC transporters; similar to TAP1 protein (transporter of processed antigen) GB:AAD53033 (Oncorhynchus mykiss); identical to cDNA transporter associated with antigen processing-like protein (TAP1) GI:
260364_at	AT1G70560	12	4		NC	NC	MC_D	380.8	455.7	418.25	P	P	0.000244	0.000732	263.1	299.7	281.4	P	P	0.001221	0.005859	-0.3	-0.9	-0.3	-0.8	-0.575	0.320156	D	D	NC	D	3	0.4	0.2	NC	NC	AT1G70560	alliinase C-terminal domain-containing protein contains Pfam profiles: PF04864 allinase C-terminal domain, PF04863 alliinase EGF-like domain
260412_at	AT1G69830	12	4		NC	NC	MC_I	2874.5	3510.2	3192.35	P	P	0.000244	0.000244	3799.2	4046.5	3922.85	P	P	0.000244	0.000244	0.4	0.2	0.5	0.3	0.35	0.129099	I	NC	I	I	3	0.2	0.1	NC	NC	AT1G69830	alpha-amylase, putative / 1,4-alpha-D-glucan glucanohydrolase, putative similar to SP|P17859 Alpha-amylase precursor (EC 3.2.1.1) (1,4-alpha-D-glucan glucanohydrolase) {Vigna mungo}, alpha-amylase [Malus x domestica] GI:7532799; contains Pfam profile PF0
260395_at	AT1G69780	12	4		NC	NC	MC_I	503.7	437.2	470.45	P	P	0.000244	0.001953	622.1	643.6	632.85	P	P	0.000244	0.000732	0.5	0.4	0.4	0.4	0.425	0.05	I	I	NC	I	3	0.1	0	NC	NC	AT1G69780	homeobox-leucine zipper protein 13 (HB-13) / HD-ZIP transcription factor 13 identical to homeobox gene 13 protein (GP:12325190) [Arabidopsis thaliana]
256300_at	AT1G69490	12	4		NC	NC	MC_I	813.6	675	744.3	P	P	0.000732	0.001221	1014.2	1037.7	1025.95	P	P	0.000732	0.000732	0.5	0.5	0.6	0.6	0.55	0.057735	I	I	NC	I	3	0	0	NC	NC	AT1G69490	no apical meristem (NAM) family protein similar to N-term half of NAC domain protein NAM [Arabidopsis thaliana] GI:4325282
260337_at	AT1G69310	12	4		NC	NC	MC_D	646.4	682.9	664.65	P	P	0.000732	0.000732	419.1	476.7	447.9	P	P	0.001221	0.000732	-0.5	-0.8	-0.4	-0.6	-0.575	0.170783	D	D	NC	D	3	0.1	0.2	NC	NC	AT1G69310	WRKY family transcription factor contains Pfam profile: PF03106 WRKY DNA -binding domain
259858_at	AT1G68400	12	4		NC	NC	MC_I	468.1	474.4	471.25	P	P	0.001953	0.00415	522.6	546.2	534.4	P	P	0.000244	0.001221	0.1	0.6	0.6	0.6	0.475	0.25	NC	I	I	I	1	0	0.2	NC	NC	AT1G68400	leucine-rich repeat transmembrane protein kinase, putative similar to receptor kinase GB:AAA33715 from [Petunia integrifolia]
260445_at	AT1G68370	12	4		NC	NC	MC_I	599.1	664.3	631.7	P	P	0.000244	0.005859	804.5	730.9	767.7	P	P	0.000244	0.000732	0.3	0.4	0.4	0.4	0.375	0.05	I	I	NC	I	3	0	0	NC	NC	AT1G68370	gravity-responsive protein / altered response to gravity protein (ARG1) identical to Altered Response to Gravity [Arabidopsis thaliana] GI:4249662; contains Pfam profile PF00226 DnaJ domain
245188_at	AT1G67660	12	4		NC	NC	MC_I	1069.6	924	996.8	P	P	0.000732	0.00293	1017.6	1211.6	1114.6	P	P	0.000244	0.000732	0.4	0.5	0.3	0.5	0.425	0.0957427	MI	I	MI	I	2	-0.2	0	NC	NC	AT1G67660	expressed protein
260192_at	AT1G67630	12	4		NC	NC	MC_I	558.3	479.5	518.9	P	P	0.008057	0.030273	829.2	988.1	908.65	P	P	0.00293	0.00293	0.4	0.4	0.8	0.8	0.6	0.23094	I	NC	I	I	3	0.1	0.3	NC	NC	AT1G67630	DNA polymerase alpha subunit B family contains Pfam profile: PF04058 DNA polymerase alpha subunit B
264968_at	AT1G67360	12	4		NC	NC	MC_D	1777.4	1932.7	1855.05	P	P	0.000244	0.000244	1296.8	1578.3	1437.55	P	P	0.000244	0.000244	-0.5	-0.5	-0.3	-0.4	-0.425	0.0957427	D	D	D	NC	3	0	0.1	NC	NC	AT1G67360	rubber elongation factor (REF) family protein contains Pfam profile: PF05755 rubber elongation factor protein (REF)
255857_at	AT1G67080	12	4		NC	NC	MC_I	1681.8	1668.5	1675.15	P	P	0.000244	0.000244	2574.9	2313.4	2444.15	P	P	0.000244	0.000244	0.4	0.6	0.3	0.5	0.45	0.129099	I	I	NC	I	3	-0.3	-0.1	NC	NC	AT1G67080	expressed protein
256373_at	AT1G66740	12	4		NC	NC	MC_I	770.1	810.8	790.45	P	P	0.000732	0.000732	1030.7	1041.2	1035.95	P	P	0.000732	0.000244	0.6	0.7	0.5	0.6	0.6	0.0816497	I	MI	I	I	3	-0.1	0	NC	NC	AT1G66740	ASF1-like anti-silencing protein, putative similar to SP|P32447 Anti-silencing protein 1 {Saccharomyces cerevisiae}; contains Pfam profile PF04729: Anti-silencing protein, ASF1-like; supporting cDNA gi|27530935|dbj|AB078339.1|
256525_at	AT1G66180	12	4		NC	NC	MC_D	4472.7	4821.1	4646.9	P	P	0.000244	0.000244	3731.5	3547.8	3639.65	P	P	0.000244	0.000244	-0.3	-0.4	-0.3	-0.4	-0.35	0.057735	D	D	NC	D	3	0.1	-0.1	NC	NC	AT1G66180	aspartyl protease family protein contains Pfam PF00026: Eukaryotic aspartyl protease profile; similar to CND41, chloroplast nucleoid DNA binding protein (GI:2541876) [Nicotiana tabacum]
256516_at	AT1G66150	12	4		NC	NC	MC_I	2184.4	1869.6	2027	P	P	0.000244	0.000244	2782.7	2440.4	2611.55	P	P	0.000244	0.000244	0.3	0.4	0.3	0.4	0.35	0.057735	NC	I	I	I	1	0	0	NC	NC	AT1G66150	leucine-rich repeat protein kinase, putative (TMK1) identical to protein kinase TMK1 gi|166888|gb|AAA32876, SP|P43298 Putative receptor protein kinase TMK1 precursor (EC 2.7.1.-) {Arabidopsis thaliana}
262932_at	AT1G65820	12	4		NC	NC	MC_D	11255.7	13152.2	12204	P	P	0.018555	0.023926	9400.1	9139.2	9269.65	P	P	0.018555	0.018555	-0.2	-0.4	-0.2	-0.4	-0.3	0.11547	D	D	NC	D	3	0.3	0	NC	NC	AT1G65820	microsomal glutathione s-transferase, putative similar to MGST3_HUMAN SP:O14880
262930_at	AT1G65690	12	4		NC	NC	MC_D	581.5	465.9	523.7	P	P	0.000244	0.000244	385.5	266.3	325.9	P	P	0.000244	0.000244	-0.6	-0.4	-1	-0.5	-0.625	0.262996	D	NC	D	D	3	-0.4	-0.1	NC	NC	AT1G65690	harpin-induced protein-related / HIN1-related / harpin-responsive protein-related similar to hin1 homolog (GI:13122296) [Arabidopsis thaliana]; similar to hin1 (GI:22830759) [Nicotiana tabacum]; contains 1 transmembrane domain;
264635_at	AT1G65500	12	4	D	NC		MC_D	7292.6	8922.4	8107.5	P	P	0.000244	0.000244	1316.2	1571.8	1444	P	P	0.008057	0.018555	-2.7	-3	-2.3	-2.6	-2.65	0.288675	D	D	D	D	4	0.4	0.3	I	NC	AT1G65500	expressed protein
262879_at	AT1G64860	12	4		NC	NC	MC_I	3072.9	2291.9	2682.4	P	P	0.000244	0.000244	4035.7	3397.7	3716.7	P	P	0.000244	0.000244	0.4	0.6	0.1	0.5	0.4	0.216025	I	I	NC	I	3	-0.3	-0.2	NC	NC	AT1G64860	RNA polymerase sigma subunit SigA (sigA) / sigma factor 1 (SIG1) identical to sigma factor SigA [Arabidopsis thaliana] GI:5478439, sigma factor 1 [Arabidopsis thaliana] GI:2353171, plastid RNA polymerase sigma-subunit [Arabidopsis thaliana] GI:2398851; c
262877_at	AT1G64850	12	4		NC	NC	MC_D	6636.6	6157.9	6397.25	P	P	0.000244	0.000244	4982.6	5350.1	5166.35	P	P	0.000244	0.000244	-0.4	-0.3	-0.4	-0.2	-0.325	0.0957427	D	D	D	NC	3	-0.2	0.1	NC	NC	AT1G64850	calcium-binding EF hand family protein contains INTERPRO:IPR002048 calcium-binding EF-hand domain
261948_at	AT1G64680	12	4		NC	NC	MC_I	3102.7	3186.7	3144.7	P	P	0.000244	0.000244	4333.1	4210.5	4271.8	P	P	0.000244	0.000244	0.4	0.4	0.3	0.3	0.35	0.057735	I	I	I	NC	3	0.1	-0.2	NC	NC	AT1G64680	expressed protein
262005_at	AT1G64550	12	4		NC	NC	MC_I	1744.1	1838	1791.05	P	P	0.000244	0.000244	2152.6	2199.1	2175.85	P	P	0.000244	0.000244	0.4	0.4	0.4	0.3	0.375	0.05	I	I	MI	NC	2	0.1	-0.1	NC	NC	AT1G64550	ABC transporter family protein similar to ABC transporter protein GB:AAF31030 GI:6899653 from [Leishmania major]
261945_at	AT1G64530	12	4		NC	NC	MC_I	342.3	403.9	373.1	P	P	0.00293	0.005859	484.8	580.5	532.65	P	P	0.001953	0.00293	0.4	0.3	0.5	0.3	0.375	0.0957427	I	I	NC	I	3	0.1	0.2	NC	NC	AT1G64530	RWP-RK domain-containing protein similar to nodule inception protein [Lotus japonicus] GI:6448579; contains Pfam profile: PF02042 RWP-RK domain
261947_at	AT1G64470	12	4		NC	NC	MC_I	185.8	156.2	171	P	P	0.008057	0.018555	282.2	315.1	298.65	P	P	0.000244	0.00293	0.6	0.6	0.6	0.6	0.6	0	NC	MI	I	I	1	-0.3	0.1	NC	NC	AT1G64470	ubiquitin family protein contains INTERPRO:IPR000626 ubiquitin domain
260292_at	AT1G63680	11	4		NC	NC	MC_I	705.2	754.3	729.75	P	P	0.018555	0.037598	1039.8	724.9	882.35	P	P	0.00415	0.010742	0.5	0.6	0.2	0.3	0.4	0.182574	I	I	NC	MI	2	-0.2	-0.4	NC	NC	AT1G63680	Mur ligase family protein contains Pfam profile: PF01225 Mur ligase family, catalytic domain
261544_at	AT1G63540	12	4		NC	NC	MC_D	499.4	700	599.7	P	P	0.023926	0.023926	365.1	352.6	358.85	P	P	0.023926	0.023926	-0.5	-0.8	-0.4	-0.8	-0.625	0.206155	D	D	MD	D	3	0.5	0.1	NC	NC	AT1G63540	hydroxyproline-rich glycoprotein family protein
260083_at	AT1G63220	12	4		NC	NC	MC_D	1097.7	1162.8	1130.25	P	P	0.000244	0.000244	769.4	836.1	802.75	P	P	0.000244	0.000244	-0.5	-0.4	-0.7	-0.5	-0.525	0.125831	D	NC	D	MD	2	-0.1	-0.1	NC	NC	AT1G63220	C2 domain-containing protein similar to phloem protein RPP16 [Oryza sativa (japonica cultivar-group)] GI:21998839; contains Pfam profile PF00168: C2 domain
265121_at	AT1G62560	12	4		NC	NC	MC_D	1890.5	1609.2	1749.85	P	P	0.000244	0.000244	1298.6	1348.5	1323.55	P	P	0.000244	0.000732	-0.4	-0.5	-0.3	-0.5	-0.425	0.0957427	D	D	D	NC	3	0.1	0	NC	NC	AT1G62560	flavin-containing monooxygenase family protein / FMO family protein similar to flavin-containing monooxygenase GB:AAA21178 GI:349534 SP|P32417 from [Oryctolagus cuniculus]; contains Pfam profile PF00743 Flavin-binding monooxygenase-like
265116_at	AT1G62480	12	4	D		NC	MC_D	5013.4	4098.6	4556	P	P	0.000244	0.000244	2687.8	1849.3	2268.55	P	P	0.000244	0.000244	-0.9	-0.6	-1.4	-1.1	-1	0.33665	D	D	D	D	4	-0.4	-0.5	NC	D	AT1G62480	vacuolar calcium-binding protein-related contains weak similarity to vacuolar calcium binding protein [Raphanus sativus] gi|9049359|dbj|BAA99394
259717_at	AT1G61010	12	4		NC	NC	MC_I	794.9	986.4	890.65	P	P	0.000244	0.000244	1091.9	1159.1	1125.5	P	P	0.000244	0.000244	0.5	0.2	0.4	0.3	0.35	0.129099	I	I	I	MI	3	0.2	0	NC	NC	AT1G61010	cleavage and polyadenylation specificity factor, putative similar to cleavage and polyadenylation specificity factor 73 kDa subunit [Homo sapiens] SWISS-PROT:Q9UKF6
263728_at	AT1G60070	12	4		NC	NC	MC_I	1104.8	1533.7	1319.25	P	P	0.000244	0.000244	1719.7	1477.4	1598.55	P	P	0.000244	0.000244	0.6	0.2	0.5	0.2	0.375	0.206155	I	MI	I	NC	2	0.3	-0.1	NC	NC	AT1G60070	gamma-adaptin, putative similar to gamma-adaptin GI:2765190 from [Homo sapiens]; contains Pfam profiles PF01602: Adaptin N terminal region, PF02883: Adaptin C-terminal domain
260598_at	AT1G55930	12	4		NC	NC	MC_I	220.4	201	210.7	P	P	0.00293	0.037598	349.2	253.3	301.25	P	P	0.000244	0.00293	0.4	0.7	0.1	0.6	0.45	0.264575	I	I	NC	MI	2	-0.3	-0.1	NC	NC	AT1G55930	CBS domain-containing protein / transporter associated domain-containing protein contains Pfam profiles PF00571: CBS domain, PF03471: Transporter associated domain, PF01595: Domain of unknown function
259658_at	AT1G55370	12	4		NC	NC	MC_I	615.6	578.7	597.15	P	P	0.000244	0.000244	724.7	730	727.35	P	P	0.000244	0.000244	0.5	0.8	0.4	0.6	0.575	0.170783	I	I	NC	MI	2	-0.2	-0.2	NC	NC	AT1G55370	expressed protein
256149_at	AT1G55110	12	4		NC	NC	MC_I	727.5	715.6	721.55	P	P	0.001953	0.00293	807.1	897.8	852.45	P	P	0.001221	0.001953	0.2	0.3	0.3	0.5	0.325	0.125831	NC	I	I	I	1	-0.1	0.2	NC	NC	AT1G55110	zinc finger (C2H2 type) family protein contains Pfam domain, PF00096: Zinc finger, C2H2 type
264189_s_at	AT1G54630	12	4		NC	NC	MC_D	12605.6	14838.5	13722	P	P	0.000244	0.000244	9810.4	9937.5	9873.95	P	P	0.000244	0.000244	-0.4	-0.4	-0.3	-0.4	-0.375	0.05	D	D	D	NC	3	0.1	0.1	NC	NC	AT1G54630	acyl carrier protein 3, chloroplast (ACP-3) nearly identical to SP|P25702 Acyl carrier protein 3, chloroplast precursor (ACP) {Arabidopsis thaliana}
260979_at	AT1G53510	12	4		NC	NC	MC_I	616.9	700.7	658.8	P	P	0.001221	0.00293	717.4	787.2	752.3	P	P	0.000244	0.000732	0.6	0.4	0.5	0.2	0.425	0.170783	I	I	I	NC	3	0.1	-0.2	NC	NC	AT1G53510	mitogen-activated protein kinase, putative / MAPK, putative (MPK18) mitogen-activated protein kinase (MAPK)(AtMPK18), PMID:12119167
260156_at	AT1G52880	12	4		NC	NC	MC_D	849.4	902	875.7	P	P	0.000244	0.000244	588.4	570.7	579.55	P	P	0.000244	0.000732	-0.6	-0.6	-0.6	-0.5	-0.575	0.05	D	D	NC	MD	2	0.1	0.1	NC	NC	AT1G52880	no apical meristem (NAM) family protein contains Pfam PF02365: No apical meristem (NAM) domain; similar to NAM (no apical meristem) GB:CAA63101 from [Petunia x hybrida]; identical to cDNA NAC domain protein GI:4325285
260150_at	AT1G52820	10	4	I	NC		MC_I	526.6	313.2	419.9	P	P	0.001953	0.037598	1064.4	837.4	950.9	P	P	0.000244	0.000732	1.3	1.8	0.8	1.8	1.425	0.478714	I	I	I	I	4	-0.6	-0.4	D	NC	AT1G52820	2-oxoglutarate-dependent dioxygenase, putative similar to AOP1 [Arabidopsis lyrata][GI:16118889]; contains Pfam profile PF03171: 2OG-Fe(II) oxygenase superfamily domain
259609_at	AT1G52410	12	4		NC	NC	MC_D	791.1	706.9	749	P	P	0.005859	0.00415	458.6	705.7	582.15	P	P	0.00415	0.023926	-0.7	-0.8	-0.3	-0.5	-0.575	0.221736	D	D	D	NC	3	0	0.3	NC	NC	AT1G52410	caldesmon-related weak similarity to Caldesmon (CDM) (Swiss-Prot:P12957) [Gallus gallus]
259640_at	AT1G52400	12	4		NC	NC	MC_D	3116.7	2917.3	3017	P	P	0.000244	0.000244	1932.6	2393	2162.8	P	P	0.000244	0.000244	-0.7	-0.7	-0.4	-0.3	-0.525	0.206155	D	D	D	NC	3	0.1	0.3	NC	NC	AT1G52400	glycosyl hydrolase family 1 protein / beta-glucosidase, putative (BG1) contains Pfam PF00232 : Glycosyl hydrolase family 1 domain; TIGRFAM TIGR01233: 6-phospho-beta-galactosidase; identical to GI:6651430 from [Arabidopsis thaliana]
259835_at	AT1G52160	12	4		NC	NC	MC_I	591.2	526.6	558.9	P	P	0.005859	0.008057	725	722.6	723.8	P	P	0.001221	0.00293	0.3	0.6	0.4	0.5	0.45	0.129099	MI	I	NC	I	1	-0.1	-0.1	NC	NC	AT1G52160	metallo-beta-lactamase family protein
265053_at	AT1G52000	12	4		NC	NC	MC_D	870.1	887.2	878.65	P	P	0.001953	0.00415	358.6	578.9	468.75	P	P	0.005859	0.008057	-1	-1.2	-0.6	-0.8	-0.9	0.258199	D	D	D	MD	3	0	0.5	NC	NC	AT1G52000	jacalin lectin family protein similar to myrosinase binding protein [Brassica napus] GI:1711296, myrosinase-binding protein homolog [Arabidopsis thaliana] GI:2997767; contains Pfam profile: PF01419 jacalin-like lectin domain
246368_at	AT1G51890	12	4		NC	NC	MC_D	332.8	476.7	404.75	P	P	0.001221	0.001953	296.2	231.9	264.05	P	P	0.00293	0.00293	-0.2	-0.3	-0.4	-0.8	-0.425	0.262996	NC	D	D	D	1	0.4	-0.2	NC	NC	AT1G51890	leucine-rich repeat protein kinase, putative similar to light repressible receptor protein kinase [Arabidopsis thaliana] gi|1321686|emb|CAA66376; contains leucine rich repeat (LRR) domains, Pfam:PF00560; contains protein kinase domain, Pfam:PF00069
256169_at	AT1G51800	12	4	D	NC		MC_D	758.6	1121	939.8	P	P	0.001221	0.000732	412.4	556.6	484.5	P	P	0.00415	0.00293	-0.9	-1.5	-0.9	-1.4	-1.175	0.320156	D	D	D	D	4	0.4	0	I	NC	AT1G51800	leucine-rich repeat protein kinase, putative similar to light repressible receptor protein kinase [Arabidopsis thaliana] gi|1321686|emb|CAA66376; contains leucine rich repeat (LRR) domains, Pfam:PF00560; contains protein kinase domain, Pfam:PF00069
256183_at	AT1G51660	12	4		NC	NC	MC_D	789.8	703.2	746.5	P	P	0.00293	0.001953	465.6	437.9	451.75	P	P	0.00415	0.01416	-0.6	-0.3	-0.7	-0.7	-0.575	0.189297	D	NC	D	D	3	-0.2	0	NC	NC	AT1G51660	mitogen-activated protein kinase kinase (MAPKK), putative (MKK4) identical to MAP kinase kinase 4 [Arabidopsis thaliana] gi|3219271|dbj|BAA28830 gi_13265419
245748_at	AT1G51140	12	4		NC	NC	MC_I	379.2	386.8	383	P	P	0.008057	0.01416	454.2	568	511.1	P	P	0.00415	0.001953	0.6	0.6	0.5	0.8	0.625	0.125831	NC	MI	I	I	1	0	0	NC	NC	AT1G51140	basic helix-loop-helix (bHLH) family protein contains Pfam profile: PF00010 helix-loop-helix DNA-binding domain
245744_at	AT1G51110	12	4	I	NC		MC_I	1054.9	795.5	925.2	P	P	0.000244	0.000244	1474.6	1389	1431.8	P	P	0.000244	0.000244	0.4	0.8	0.4	0.7	0.575	0.206155	I	I	I	I	4	-0.4	-0.1	D	NC	AT1G51110	plastid-lipid associated protein PAP / fibrillin family protein similar to plastid-lipid associated protein PAP2 [Brassica rapa] GI:14248550; contains Pfam profile PF04755: PAP_fibrillin
245745_at	AT1G51110	12	4	I	NC		MC_I	1466.3	1066.7	1266.5	P	P	0.000244	0.000244	2328.8	2256.4	2292.6	P	P	0.000244	0.000244	0.6	1	0.6	1.1	0.825	0.262996	I	I	I	I	4	-0.3	0	D	NC	AT1G51110	plastid-lipid associated protein PAP / fibrillin family protein similar to plastid-lipid associated protein PAP2 [Brassica rapa] GI:14248550; contains Pfam profile PF04755: PAP_fibrillin
262468_at	AT1G50200	12	4		NC	NC	MC_I	4614.8	4718	4666.4	P	P	0.000732	0.000732	5736.2	5666	5701.1	P	P	0.000244	0.000244	0.3	0.2	0.3	0.2	0.25	0.057735	I	NC	I	I	3	0.2	0.1	NC	NC	AT1G50200	aminoacyl-tRNA synthetase family protein contains Pfam profiles: PF01411 tRNA synthetases class II (A), PF02272 DHHA1 domain
257020_at	AT1G49910;AT3G19590	12	4		NC	NC	MC_I	597.3	669.9	633.6	P	P	0.000244	0.000732	1001.3	791.6	896.45	P	P	0.000244	0.000244	0.8	0.6	0.6	0.4	0.6	0.163299	I	I	I	NC	3	0.2	-0.3	NC	NC	AT1G49910;AT3G19590	[AT1G49910, WD-40 repeat family protein / mitotic checkpoint protein, putative contains 5 WD-40 repeats (PF00400) (1 weak); similar to testis mitotic checkpoint protein BUB3 (GB:AAC28439,SP:O43684)[Homo sapiens]];[AT3G19590, WD-40 repeat family protein
259818_at	AT1G49890	12	4		NC	NC	MC_I	572.1	430.8	501.45	P	P	0.001953	0.001221	715.8	666.6	691.2	P	P	0.000732	0.000244	0.5	0.5	0.6	0.5	0.525	0.05	I	NC	I	I	3	0.1	-0.1	NC	NC	AT1G49890	expressed protein contains Pfam domain, PF04484: Family of unknown function (DUF566)
261614_at	AT1G49760	12	4		NC	NC	MC_I	4047.9	4176.1	4112	P	P	0.000244	0.000244	5676.9	4998	5337.45	P	P	0.000244	0.000244	0.4	0.3	0.4	0.3	0.35	0.057735	I	I	I	NC	3	0.1	-0.1	NC	NC	AT1G49760	polyadenylate-binding protein, putative / PABP, putative similar to poly(A)-binding protein GB:AAF66825 GI:7673359 from [Nicotiana tabacum]
261607_at	AT1G49660	12	4		NC	NC	MC_D	1773.3	1179.7	1476.5	P	P	0.000244	0.000732	658.6	952.6	805.6	P	P	0.000244	0.000732	-0.8	-0.7	-0.6	-0.4	-0.625	0.170783	D	D	D	NC	3	-0.2	0.4	NC	NC	AT1G49660	expressed protein
260766_at	AT1G48960	12	4		NC	NC	MC_D	541.5	609	575.25	P	P	0.00293	0.00415	483	574.7	528.85	P	P	0.010742	0.010742	-0.4	-0.5	-0.1	-0.3	-0.325	0.170783	MD	D	NC	D	1	0.3	0.2	NC	NC	AT1G48960	universal stress protein (USP) family protein contains Pfam PF00582: universal stress protein family; similar to hypothetical protein GI:7770340 from [Arabidopsis thaliana]
256145_at	AT1G48760;AT1G48750	12	4	D	NC		MC_D	16323	13879.2	15101.1	P	P	0.000244	0.000244	10602	11395.5	10998.8	P	P	0.000244	0.000244	-0.6	-0.3	-0.5	-0.3	-0.425	0.15	D	D	D	D	4	-0.2	0	D	NC	AT1G48760;AT1G48750	[AT1G48760, delta-adaptin, putative similar to SP|O14617 Adapter-related protein complex 3 delta 1 subunit (Delta-adaptin 3) {Homo sapiens}; contains Pfam profile: PF01602 Adaptin N terminal region];[AT1G48750, protease inhibitor/seed storage/lipid tran
256140_at	AT1G48650	12	4		NC	NC	MC_I	611.8	499.8	555.8	P	P	0.000244	0.000244	744.1	777.8	760.95	P	P	0.000244	0.000244	0.4	0.5	0.4	0.4	0.425	0.05	I	I	I	NC	3	-0.1	0	NC	NC	AT1G48650	helicase domain-containing protein contains similarity to DEIH-box RNA/DNA helicase [Arabidopsis thaliana] GI:5881579; contains Pfam profiles PF04408: Helicase associated domain (HA2), PF00271: Helicase conserved C-terminal domain, PF00035: Double-strand
261309_at	AT1G48600	12	4		NC	NC	MC_I	4704	3710.6	4207.3	P	P	0.000244	0.000244	5724.9	5265.1	5495	P	P	0.000244	0.000244	0.4	0.6	0.2	0.4	0.4	0.163299	I	I	NC	I	3	-0.2	-0.2	NC	NC	AT1G48600	phosphoethanolamine N-methyltransferase 2, putative (NMT2) very similar to |PEM2_ARATH Putative phosphoethanolamine N-methyltransferase 2 (EC 2.1.1.103) (SP:Q944H0){Arabidopsis thaliana}; very similar to Halotolerance protein Hal3b (SP:P94063)[Arabidopsi
261301_at	AT1G48570	12	4	I		NC	MC_I	1234.2	1480.1	1357.15	P	P	0.000244	0.000244	1678.6	2339.3	2008.95	P	P	0.000244	0.000244	0.4	0.3	0.8	0.7	0.55	0.238048	I	I	I	I	4	0.1	0.4	NC	I	AT1G48570	zinc finger (Ran-binding) family protein contains Pfam domain, PF00641: Zn-finger in Ran binding protein and others
261307_at	AT1G48520	12	4	I		NC	MC_I	1208.3	1088.9	1148.6	P	P	0.000244	0.000244	1922.4	1352.1	1637.25	P	P	0.000244	0.000244	0.7	0.7	0.3	0.4	0.525	0.206155	I	I	I	I	4	-0.1	-0.4	NC	D	AT1G48520	glutamyl-tRNA(Gln) amidotransferase B family protein contains Pfam profiles: PF02934 PET112 family, N terminal region, PF02637 GatB/Yqey domain, PF01162 PET112 family, C terminal region
259616_at	AT1G47960	12	4		NC	NC	MC_D	616.5	557	586.75	P	P	0.000732	0.000244	354.5	434.9	394.7	P	P	0.000244	0.000244	-0.7	-0.4	-0.7	-0.3	-0.525	0.206155	D	D	NC	D	3	0	0	NC	NC	AT1G47960	invertase/pectin methylesterase inhibitor family protein low similarity to SP|P83326 Pectinesterase inhibitor (Pectin methylesterase inhibitor) (PMEI) {Actinidia chinensis}; contains Pfam profile PF04043: Plant invertase/pectin methylesterase inhibitor
266127_s_at	AT1G45332;AT2G45030	12	4		NC	NC	MC_I	1923.9	2086.4	2005.15	P	P	0.000732	0.000732	2417	2697.9	2557.45	P	P	0.000244	0.000732	0.3	0.3	0.5	0.4	0.375	0.0957427	I	NC	I	I	3	0.1	0.1	NC	NC	AT1G45332;AT2G45030	[AT1G45332, mitochondrial elongation factor, putative similar to mitochondrial elongation factor GI:3917 from [Saccharomyces cerevisiae]];[AT2G45030, mitochondrial elongation factor, putative similar to SP|P25039 Elongation factor G 1, mitochondrial pre
260943_at	AT1G45145	12	4		NC	NC	MC_D	8132	7359.9	7745.95	P	P	0.000244	0.000244	5335.6	5572.3	5453.95	P	P	0.000244	0.000244	-0.5	-0.2	-0.6	-0.4	-0.425	0.170783	D	NC	D	MD	2	-0.2	-0.1	NC	NC	AT1G45145	thioredoxin H-type 5 (TRX-H-5) (TOUL) identical to SP|Q39241 Thioredoxin H-type 5 (TRX-H-5) {Arabidopsis thaliana}; identical to cDNA (TOUL) mRNA for thioredoxin GI:992965
261335_at	AT1G44800	12	4		NC	NC	MC_D	1765.2	1348.7	1556.95	P	P	0.000244	0.000244	1148.8	936.8	1042.8	P	P	0.000732	0.000244	-0.5	-0.2	-0.6	-0.5	-0.45	0.173205	D	NC	D	D	3	-0.2	-0.2	NC	NC	AT1G44800	nodulin MtN21 family protein similar to MtN21 [Medicago truncatula] GI:2598575; contains Pfam profile PF00892: Integral membrane protein
245739_at	AT1G44110	12	4	I		NC	MC_I	554	445.8	499.9	P	P	0.000244	0.000732	860	731.7	795.85	P	P	0.000244	0.000244	0.8	1	0.6	0.7	0.775	0.170783	I	I	I	I	4	0	-0.3	NC	D	AT1G44110	cyclin, putative similar to mitotic cyclin a2-type [Glycine max] GI:857397, cyclin A-like protein [Nicotiana tabacum] GI:1064927; contains Pfam profiles PF00134: Cyclin, N-terminal domain, PF02984: Cyclin, C-terminal domain
259507_at	AT1G43910	12	4	D		NC	MC_D	2230.2	2175.5	2202.85	P	P	0.000244	0.000244	1033.6	576.8	805.2	P	P	0.001953	0.005859	-1.4	-1.5	-2.1	-2.2	-1.8	0.408248	D	D	D	D	4	0.1	-0.8	NC	D	AT1G43910	AAA-type ATPase family protein contains Pfam profile: ATPase family PF00004
260869_at	AT1G43800	12	4	D	NC		MC_D	2756.6	3775.5	3266.05	P	P	0.001953	0.001221	1426.4	1489.1	1457.75	P	P	0.00415	0.00293	-0.8	-1.5	-0.6	-1.3	-1.05	0.420317	D	D	D	D	4	0.7	0.2	I	NC	AT1G43800	acyl-[acyl-carrier-protein] desaturase, putative / stearoyl-ACP desaturase, putative similar to Acyl-[acyl-carrier protein] desaturase from Lupinus luteus GI:4704824, Asclepias syriaca GI:1762436, Ricinus communis SP|P22337; contains Pfam profile PF03405
259626_at	AT1G42990	12	4		NC	NC	MC_D	2279.7	1993.7	2136.7	P	P	0.000244	0.000244	1597.7	1720.5	1659.1	P	P	0.000244	0.000244	-0.5	-0.4	-0.4	-0.4	-0.425	0.05	D	D	D	NC	3	-0.2	0	NC	NC	AT1G42990	bZIP transcription factor family protein contains Pfam profile: PF00170: bZIP transcription factor
256542_at	AT1G42550	12	4		NC	NC	MC_I	1495.4	1435	1465.2	P	P	0.000244	0.000244	2271.5	1913.9	2092.7	P	P	0.000244	0.000244	0.4	0.3	0.4	0.4	0.375	0.05	I	I	NC	I	3	-0.1	-0.1	NC	NC	AT1G42550	expressed protein
260125_at	AT1G36390	12	4		NC	NC	MC_I	1393.1	1255.1	1324.1	P	P	0.000244	0.000244	1651.6	1500.3	1575.95	P	P	0.000244	0.000244	0.3	0.6	0.1	0.3	0.325	0.206155	I	I	NC	I	3	-0.2	-0.2	NC	NC	AT1G36390	co-chaperone grpE family protein similar to co-chaperone CGE1 precursor isoform b [Chlamydomonas reinhardtii] GI:15384279; contains Pfam profile PF01025: co-chaperone GrpE
263192_at	AT1G36160	12	4		NC	NC	MC_I	1181.2	1402.7	1291.95	P	P	0.000244	0.000732	1713	1862.2	1787.6	P	P	0.000244	0.000244	0.3	0.3	0.3	0.4	0.325	0.05	NC	I	I	I	1	-0.1	0.1	NC	NC	AT1G36160	acetyl-CoA carboxylase 1 (ACC1) nearly identical to acetyl-CoA carboxylase 1 (ACC1) [Arabidopsis thaliana] GI:11869927
262025_at	AT1G35510	12	4		NC	NC	MC_I	450.5	476.4	463.45	P	P	0.000244	0.001953	591.5	847.4	719.45	P	P	0.000244	0.000244	0.5	0.3	0.3	0.5	0.4	0.11547	MI	NC	I	I	1	0.1	0.2	NC	NC	AT1G35510	expressed protein contains Pfam PF03138: Plant protein family. The function of this family of plant proteins is unknown; previously annotated as 'growth regulator protein -related' based on similarity to axi 1 protein (GB:X80301) (GI:559920) from [Nicoti
261159_s_at	AT1G34460	12	4	I		NC	MC_I	198	141.7	169.85	P	P	0.000732	0.001953	487.4	293.2	390.3	P	P	0.000244	0.000732	1.4	1.6	0.5	0.8	1.075	0.512348	I	I	I	I	4	-0.1	-0.7	NC	D	AT1G34460	cyclin, putative strong similarity to cyclin [Arabidopsis thaliana] GI:1360646
245765_at	AT1G33600	12	4		NC	NC	MC_D	1205.5	1772.9	1489.2	P	P	0.000244	0.000244	922.6	1240.2	1081.4	P	P	0.000244	0.000244	-0.3	-0.8	0	-0.3	-0.35	0.331662	D	D	NC	D	3	0.3	0.3	NC	NC	AT1G33600	leucine-rich repeat family protein contains leucine rich-repeat (LRR) domains Pfam:PF00560, INTERPRO:IPR001611; contains similarity to gi|9294355|dbj|BAB02252 [Arabidopsis thaliana]
256512_at	AT1G33265	12	4		NC	NC	MC_D	1889.9	2347.3	2118.6	P	P	0.001953	0.001953	1396	1329.6	1362.8	P	P	0.001953	0.00293	-0.3	-0.4	-0.5	-0.4	-0.4	0.0816497	MD	D	D	MD	2	0.1	0	NC	NC	AT1G33265	expressed protein contains Pfam profile PF03647: Uncharacterised protein family (UPF0136); supporting cDNA gi|23198247|gb|BT000332.1|
261594_at	AT1G33240	12	4		NC	NC	MC_I	954.5	839.7	897.1	P	P	0.000244	0.000244	1256.2	1193.1	1224.65	P	P	0.000244	0.000244	0.3	0.5	0.2	0.4	0.35	0.129099	I	I	NC	I	3	-0.2	-0.2	NC	NC	AT1G33240	trihelix DNA-binding protein, putative similar to GTL1 [Arabidopsis thaliana] GI:2664198
261618_at	AT1G33110	12	4		NC	NC	MC_I	1156.2	1491.7	1323.95	P	P	0.000732	0.000732	1553	1847.2	1700.1	P	P	0.000244	0.000732	0.4	0.2	0.6	0.4	0.4	0.163299	I	NC	I	I	3	0.2	0.2	NC	NC	AT1G33110	MATE efflux family protein similar to ripening regulated protein DDTFR18 [Lycopersicon esculentum] GI:12231296; contains Pfam profile PF01554: Uncharacterized membrane protein family
261615_at	AT1G33050	12	4		NC	NC	MC_I	358	325.1	341.55	P	P	0.000244	0.000244	518.6	544.3	531.45	P	P	0.000244	0.000244	0.5	0.3	0.5	0.6	0.475	0.125831	NC	I	I	I	1	0	0.1	NC	NC	AT1G33050	expressed protein
245784_at	AT1G32190	12	4		NC	NC	MC_I	308.1	286.4	297.25	P	P	0.005859	0.00415	391.2	418.4	404.8	P	P	0.000732	0.001953	0.4	0.4	0.4	0.4	0.4	0	I	NC	I	I	3	0.2	0	NC	NC	AT1G32190	expressed protein
255749_at	AT1G31970	12	4		NC	NC	MC_I	2228.3	2156.9	2192.6	P	P	0.001953	0.00293	3252.4	2834.6	3043.5	P	P	0.00293	0.001953	0.3	0.5	0.4	0.5	0.425	0.0957427	I	I	MI	I	3	-0.1	0	NC	NC	AT1G31970	DEAD/DEAH box helicase, putative similar to p68 RNA helicase [Schizosaccharomyces pombe] GI:173419
246265_at	AT1G31860	12	4		NC	NC	MC_I	1444.2	1092.6	1268.4	P	P	0.000244	0.000244	1941.5	1587.1	1764.3	P	P	0.000244	0.000244	0.3	0.5	0.2	0.4	0.35	0.129099	I	I	NC	I	3	-0.3	-0.1	NC	NC	AT1G31860	histidine biosynthesis bifunctional protein (HISIE) identical to histidine biosynthesis bifunctional protein hisIE, chloroplast [precursor] SP: O82768 from [Arabidopsis thaliana]; identical to cDNA phosphoribosyl-ATP pyrophosphohydrolase GI:3461883
246575_at	AT1G31660	12	4		NC	NC	MC_I	1148.1	1352.3	1250.2	P	P	0.000244	0.000244	1401.5	1530.2	1465.85	P	P	0.000244	0.000244	0.5	0.2	0.7	0.4	0.45	0.208167	I	NC	I	I	3	0.3	0.2	NC	NC	AT1G31660	bystin family contains Pfam profile: PF05291 Bystin
263226_at	AT1G30690	12	4		NC	NC	MC_I	734.3	736.1	735.2	P	P	0.000732	0.000244	1277.2	932.5	1104.85	P	P	0.000244	0.000244	0.7	1	0.3	0.5	0.625	0.298608	I	I	NC	I	3	-0.1	-0.5	NC	NC	AT1G30690	SEC14 cytosolic factor family protein / phosphoglyceride transfer family protein contains Pfam PF00650 : CRAL/TRIO domain; contains Pfam PF03765 : CRAL/TRIO, N-terminus; similar to cytosolic factor (Phosphatidylinositol/phosphatidylcholine transfer prote
256310_at	AT1G30360	12	4		NC	NC	MC_I	4162.9	4076.8	4119.85	P	P	0.000244	0.000244	6116.3	6400.8	6258.55	P	P	0.000244	0.000244	0.5	0.5	0.5	0.5	0.5	0	I	I	MI	I	3	0	-0.1	NC	NC	AT1G30360	early-responsive to dehydration stress protein (ERD4) nearly identical to ERD4 protein (early-responsive to dehydration stress) [Arabidopsis thaliana] GI:15375406; contains Pfam profile PF02714: Domain of unknown function DUF221
260049_at	AT1G29940	12	4		NC	NC	MC_I	1149.9	1448.7	1299.3	P	P	0.001221	0.000732	1584.9	1751.3	1668.1	P	P	0.000732	0.000732	0.5	0.2	0.6	0.4	0.425	0.170783	I	MI	I	I	3	0.2	0.1	NC	NC	AT1G29940	DNA-directed RNA polymerase family protein similar to SP|P22138 DNA-directed RNA polymerase I 135 kDa polypeptide (EC 2.7.7.6) (RNA polymerase I subunit 2) {Saccharomyces cerevisiae}; contains Pfam profiles PF04563; RNA polymerase beta subunit, PF04560:
260887_at	AT1G29160	12	4		NC	NC	MC_D	622.2	433.8	528	P	P	0.000732	0.00293	452.9	327.3	390.1	P	P	0.001221	0.00293	-0.6	-0.4	-0.7	-0.7	-0.6	0.141421	D	NC	D	D	3	-0.1	-0.1	NC	NC	AT1G29160	Dof-type zinc finger domain-containing protein similar to ascorbate oxidase promoter-binding protein GB:D45066 GI:853689 from [Cucurbita maxima]
261269_at	AT1G26690	12	4		NC	NC	MC_D	1225	838.5	1031.75	P	P	0.000732	0.001953	752.9	751.4	752.15	P	P	0.001953	0.00415	-0.6	-0.2	-0.6	-0.3	-0.425	0.206155	D	NC	D	D	3	-0.2	0	NC	NC	AT1G26690	emp24/gp25L/p24 family protein similar to SP|P49755 Transmembrane protein Tmp21 precursor (21 kDa Transmembrane trafficking protein) {Homo sapiens}; contains Pfam profile PF01105: emp24/gp25L/p24 family
245845_at	AT1G26150	12	4		NC	NC	MC_I	404.5	556.7	480.6	P	P	0.001221	0.000732	487.2	610.7	548.95	P	P	0.000732	0.000244	0.6	0.4	0.6	0.4	0.5	0.11547	NC	I	MI	I	1	0.2	0	NC	NC	AT1G26150	protein kinase family protein similar to Pto kinase interactor 1 GI:3668069 from [Lycopersicon esculentum]
245639_at	AT1G25260	12	4		NC	NC	MC_I	4506	3923.3	4214.65	P	P	0.000244	0.000244	5483.7	4861	5172.35	P	P	0.000244	0.000244	0.3	0.5	0.1	0.4	0.325	0.170783	I	I	NC	I	3	-0.2	-0.1	NC	NC	AT1G25260	acidic ribosomal protein P0-related contains similarity to 60S acidic ribosomal protein GI:5815233 from [Homo sapiens]
265023_at	AT1G24440	12	4		NC	NC	MC_I	951.6	799	875.3	P	P	0.000244	0.000244	1328.7	1376.2	1352.45	P	P	0.000244	0.000244	0.4	0.5	0.4	0.6	0.475	0.0957427	I	I	NC	I	3	-0.2	0	NC	NC	AT1G24440	expressed protein similar to MTD2 [Medicago truncatula] GI:9294812
264857_at	AT1G24170	12	4		NC	NC	MC_D	2877	2984.9	2930.95	P	P	0.000244	0.000244	2189	1986.7	2087.85	P	P	0.000244	0.000244	-0.5	-0.3	-0.6	-0.3	-0.425	0.15	D	D	D	MD	3	-0.1	-0.1	NC	NC	AT1G24170	glycosyl transferase family 8 protein contains Pfam profile: PF01501 glycosyl transferase family 8
264865_at	AT1G24120	12	4		NC	NC	MC_I	926.9	1101	1013.95	P	P	0.001221	0.001953	1326.8	1169.3	1248.05	P	P	0.000244	0.000732	0.4	0.3	0.4	0.2	0.325	0.0957427	I	MI	I	NC	2	0.2	-0.1	NC	NC	AT1G24120	DNAJ heat shock protein, putative similar to Altered Response to Gravity [Arabidopsis thaliana] GI:4249662; contains Pfam profile PF00226 DnaJ domain
265187_at	AT1G23490	12	4		NC	NC	MC_D	10932.7	12687.8	11810.2	P	P	0.000244	0.000244	9064.2	8954.1	9009.15	P	P	0.000244	0.000244	-0.3	-0.5	-0.3	-0.4	-0.375	0.0957427	D	D	NC	D	3	0.2	0	NC	NC	AT1G23490	ADP-ribosylation factor identical to SP:Q9SRC3 ADP-ribosylation factor 1-like [Arabidopsis thaliana], ADP-ribosylation factor GI:166586 [Arabidopsis thaliana]
262986_at	AT1G23390	12	4	I	NC		MC_I	4228.5	2883	3555.75	P	P	0.000732	0.000732	7062.4	6314.1	6688.25	P	P	0.000244	0.000732	0.6	0.9	0.6	0.9	0.75	0.173205	I	I	I	I	4	-0.3	0	D	NC	AT1G23390	kelch repeat-containing F-box family protein similar to hypothetical protein GB:AAF27090 GI:6730669 from (Arabidopsis thaliana); contains Pfam profiles PF01344: Kelch motif, PF00646: F-box domain
264893_at	AT1G23140	12	4	D		NC	MC_D	934.3	1031.8	983.05	P	P	0.000732	0.000732	706.6	416.4	561.5	P	P	0.000732	0.00415	-0.4	-0.5	-1	-1.1	-0.75	0.351188	D	D	D	D	4	0.1	-0.7	NC	D	AT1G23140	C2 domain-containing protein similar to zinc finger and C2 domain protein GI:9957238 from [Arabidopsis thaliana]
264899_at	AT1G23130	12	4		NC	NC	MC_D	9975.7	9018.6	9497.15	P	P	0.000244	0.000244	6664.3	7227.3	6945.8	P	P	0.000244	0.000244	-0.5	-0.6	-0.3	-0.5	-0.475	0.125831	D	D	D	MD	3	0.1	0.2	NC	NC	AT1G23130	Bet v I allergen family protein similar to Csf-2 [Cucumis sativus][GI:5762258][J Am Soc Hortic Sci 124, 136-139 (1999)]; location of ESTs gb|T45139 and gb|T43456 ; contains Pfam profile PF00407: Pathogenesis-related protein Bet v I family
264210_at	AT1G22640	12	4		NC	NC	MC_I	544.9	490.9	517.9	P	P	0.001953	0.008057	658.7	654.9	656.8	P	P	0.00293	0.00293	0.3	0.4	0.4	0.3	0.35	0.057735	NC	I	I	I	1	-0.1	0	NC	NC	AT1G22640	myb family transcription factor (MYB4) similar to myb-related protein GI:1020155 from [Arabidopsis thaliana]
261942_at	AT1G22590	12	4		NC	NC	MC_I	715.4	708.2	711.8	P	P	0.000244	0.001221	1113	1161.3	1137.15	P	P	0.000244	0.000732	0.7	1.1	0.4	0.7	0.725	0.287228	I	I	NC	I	3	-0.4	-0.3	NC	NC	AT1G22590	MADS-box family protein similar to putative DNA-binding protein GI:6714399 from [Arabidopsis thaliana]; MADS-box protein AGL87
260877_at	AT1G21500	12	4		NC	NC	MC_I	3589.9	3772	3680.95	P	P	0.000244	0.000244	4612.8	4160.3	4386.55	P	P	0.000244	0.000244	0.3	0.3	0.2	0.3	0.275	0.05	I	I	NC	I	3	0	0	NC	NC	AT1G21500	expressed protein
262801_at	AT1G21010	12	4		NC	NC	MC_D	692	520.9	606.45	P	P	0.000732	0.000244	453.2	344.4	398.8	P	P	0.000732	0.000244	-0.6	-0.4	-0.3	-0.4	-0.425	0.125831	D	D	D	NC	3	-0.1	0	NC	NC	AT1G21010	expressed protein
259517_at	AT1G20630	12	4		NC	NC	MC_I	1988.5	2159.7	2074.1	P	P	0.000244	0.000244	2544.2	2789.1	2666.65	P	P	0.000244	0.000244	0.4	0.4	0.4	0.4	0.4	0	I	NC	I	I	3	0.2	0	NC	NC	AT1G20630	catalase 1 identical to catalase 1 GI:2511725 from [Arabidopsis thaliana]
259563_s_at	AT1G20590;AT1G20610	12	4		NC	NC	MC_I	229.1	227.2	228.15	P	P	0.000244	0.000244	445.4	335.2	390.3	P	P	0.000244	0.000244	1	1	0.6	0.6	0.8	0.23094	I	I	NC	I	3	0	-0.2	NC	NC	AT1G20590;AT1G20610	[AT1G20590, cyclin, putative similar to SP|Q40671 G2/mitotic-specific cyclin 2 (B-like cyclin) (CYCOS2) {Oryza sativa}; contains Pfam profiles PF00134: Cyclin, N-terminal domain, PF02984: Cyclin, C-terminal domain];[AT1G20610, cyclin, putative similar t
259571_at	AT1G20410	12	4		NC	NC	MC_I	393.3	512.4	452.85	P	P	0.001221	0.001953	574.7	578.1	576.4	P	P	0.001221	0.000244	0.4	0.1	0.6	0.4	0.375	0.206155	MI	NC	I	I	1	0.3	0.2	NC	NC	AT1G20410	expressed protein
261224_at	AT1G20160	12	4		NC	NC	MC_D	914.7	923	918.85	P	P	0.001221	0.00415	749.2	789.5	769.35	P	P	0.00293	0.00293	-0.3	-0.3	-0.6	-0.6	-0.45	0.173205	D	NC	D	D	3	-0.1	-0.2	NC	NC	AT1G20160	subtilase family protein similar to subtilisin-type protease precursor GI:14150446 from [Glycine max]
261231_at	AT1G20110	12	4		NC	NC	MC_D	4460.8	5133.2	4797	P	P	0.000732	0.000244	3533.4	3736.2	3634.8	P	P	0.000244	0.000244	-0.3	-0.5	-0.2	-0.3	-0.325	0.125831	D	D	NC	D	3	0.2	0.1	NC	NC	AT1G20110	zinc finger (FYVE type) family protein contains Pfam profile: PF01363 FYVE zinc finger
260662_at	AT1G19540	12	4		NC	NC	MC_D	433.6	445.1	439.35	P	P	0.001221	0.001953	310.1	309.9	310	P	P	0.00293	0.001953	-0.5	-0.6	-0.6	-0.4	-0.525	0.0957427	D	MD	D	NC	2	-0.1	0	NC	NC	AT1G19540	isoflavone reductase, putative similar to SP|P52577; contains isoflavone reductase domain PF02716
259474_at	AT1G19130	12	4		NC	NC	MC_D	2397.9	2594.6	2496.25	P	P	0.000244	0.000244	1838	1964.6	1901.3	P	P	0.000244	0.000244	-0.5	-0.6	-0.3	-0.5	-0.475	0.125831	D	D	NC	D	3	0.2	0.2	NC	NC	AT1G19130	expressed protein
259466_at	AT1G19050	12	4	D	NC		MC_D	1165.4	1183.7	1174.55	P	P	0.000244	0.000732	678.4	874.3	776.35	P	P	0.000244	0.001953	-1	-0.6	-0.7	-0.4	-0.675	0.25	D	D	D	D	4	-0.3	0.2	MD	NC	AT1G19050	two-component responsive regulator / response regulator 7 (ARR7) identical to response regulator 7 GI:3953603 from [Arabidopsis thaliana]
261668_at	AT1G18500	12	4		NC	NC	MC_I	2068.3	2184.1	2126.2	P	P	0.000244	0.000732	2350	3171.7	2760.85	P	P	0.000732	0.000244	0.3	0.3	0.6	0.2	0.35	0.173205	I	I	I	NC	3	0.1	0.1	NC	NC	AT1G18500	2-isopropylmalate synthase, putative strong similarity to 2-isopropylmalate synthase (IMS1) [Arabidopsis thaliana] GI:12330687; contains Pfam profile PF00682: HMGL-like
261672_at	AT1G18450	12	4		NC	NC	MC_I	1368.4	1570.2	1469.3	P	P	0.000244	0.000244	1753.1	1986.1	1869.6	P	P	0.000244	0.000244	0.4	0.1	0.5	0.4	0.35	0.173205	I	NC	I	I	3	0.1	0.2	NC	NC	AT1G18450	actin-related protein 4 (ARP4) neary identical to actin-related protein 4 (ARP4) [Arabidopsis thaliana] GI:21427463; contains Pfam profile PF00022: Actin; supporting cDNA gi|21427462|gb|AF507912.1|
261717_at	AT1G18400	12	4		NC	NC	MC_D	702.9	481.5	592.2	P	P	0.000732	0.000244	399.5	468.6	434.05	P	P	0.000244	0.030273	-0.7	-0.5	-0.5	-0.2	-0.475	0.206155	D	D	D	NC	3	-0.3	0.3	NC	NC	AT1G18400	basic helix-loop-helix (bHLH) family protein contains Pfam profile: PF00010 helix-loop-helix DNA-binding domain
261674_at	AT1G18270	12	4		NC	NC	MC_D	1243.9	1434.9	1339.4	P	P	0.000732	0.001221	1157.8	1093.2	1125.5	P	P	0.000732	0.001953	-0.2	-0.4	-0.3	-0.5	-0.35	0.129099	NC	D	D	D	1	0.2	-0.1	NC	NC	AT1G18270	ketose-bisphosphate aldolase class-II family protein low similarity to KbaY (tagatose-1,6-bisphosphate aldolase) [Escherichia coli] GI:8895753; contains Pfam profile PF01116: Fructose-bisphosphate aldolase class-II
256125_at	AT1G18250	12	4		NC	NC	MC_I	865.3	1334.6	1099.95	P	P	0.000244	0.001221	1393	1441.8	1417.4	P	P	0.000244	0.001953	0.5	0.3	0.5	0.4	0.425	0.0957427	I	I	I	NC	3	0.1	0.1	NC	NC	AT1G18250	thaumatin, putative identical to SP|P50699 Thaumatin-like protein precursor {Arabidopsis thaliana}; strong similarity to pathogenesis-related group 5 protein GI:2749943 from [Brassica rapa]
256129_at	AT1G18210	12	4		NC	NC	MC_D	4685.4	5211.3	4948.35	P	P	0.000244	0.000244	3950.7	4679.7	4315.2	P	P	0.000244	0.000244	-0.3	-0.4	-0.2	-0.4	-0.325	0.0957427	D	D	NC	D	3	0.2	0.1	NC	NC	AT1G18210	calcium-binding protein, putative similar to SP|Q9M7R0 Calcium-binding allergen Ole e 8 (PCA18/PCA23) {Olea europaea}; contains INTERPRO:IPR002048 calcium-binding EF-hand domain
255890_at	AT1G17850	11	4		NC	NC	MC_I	224.5	262.7	243.6	P	P	0.023926	0.018555	307.3	299.3	303.3	P	P	0.00415	0.018555	0.5	0.3	0.5	0.4	0.425	0.0957427	I	NC	I	I	3	0.1	0	NC	NC	AT1G17850	expressed protein
262517_at	AT1G17180	12	4	I	NC		MC_I	796.9	912.4	854.65	P	P	0.000244	0.000732	988.5	1024.1	1006.3	P	P	0.000244	0.000244	0.5	1	0.4	1.1	0.75	0.351188	I	I	I	I	4	-0.6	0	D	NC	AT1G17180	glutathione S-transferase, putative Second of three repeated putative glutathione transferases. 72% identical to glutathione transferase [Arabidopsis thaliana] (gi|4006934). Location of ests 191A10T7 (gb|R90188) and 171N13T7 (gb|R65532)
262538_at	AT1G17140	12	4		NC	NC	MC_I	216.4	191.6	204	P	P	0.000244	0.030273	509.5	263.2	386.35	P	P	0.001221	0.000732	1.2	1.2	1	0.7	1.025	0.236291	I	I	I	NC	3	0.3	-0.3	NC	NC	AT1G17140	tropomyosin-related similar to Tropomyosin 1. [Baker's yeast](SP:P17536) {Saccharomyces cerevisiae}
262713_at	AT1G16520	12	4		NC	NC	MC_I	601.9	659.5	630.7	P	P	0.000244	0.000244	894.5	857.3	875.9	P	P	0.000244	0.000244	0.6	0.6	0.4	0.3	0.475	0.15	I	I	I	NC	3	0.2	-0.1	NC	NC	AT1G16520	expressed protein
262717_s_at	AT1G16410;AT1G16400	12	4		NC	NC	MC_D	1227.4	1048.4	1137.9	P	P	0.000732	0.000244	935.5	1066	1000.75	P	P	0.000732	0.000244	-0.5	-0.5	-0.4	-0.3	-0.425	0.0957427	D	D	D	NC	3	-0.1	0.3	NC	NC	AT1G16410;AT1G16400	[AT1G16410, cytochrome P450, putative similar to gb|AF069494 cytochrome P450 from Sinapis alba and is a member of the PF|00067 Cytochrome P450 family];[AT1G16400, cytochrome P450 family protein similar to gb|AF069494 cytochrome P450 from Sinapis alba an
261844_at	AT1G15940	11	4		NC	NC	MC_I	260.3	230.5	245.4	P	P	0.030273	0.001953	365.4	343.6	354.5	P	P	0.000244	0.00415	0.7	0.5	0.7	0.4	0.575	0.15	I	MI	I	NC	2	0.2	0.2	NC	NC	AT1G15940	expressed protein similar To androgen-induced prostate proliferative shutoff associated protein (GI:4559410) [Homo sapiens]
262593_at	AT1G15120	12	4		NC	NC	MC_D	5845	5715.2	5780.1	P	P	0.000244	0.000244	4746.9	4277	4511.95	P	P	0.000244	0.000244	-0.4	-0.2	-0.4	-0.4	-0.35	0.1	D	NC	D	D	3	-0.1	-0.2	NC	NC	AT1G15120	ubiquinol-cytochrome C reductase complex 7.8 kDa protein, putative / mitochondrial hinge protein, putative similar to SP|P48504 Ubiquinol-cytochrome C reductase complex 7.8 kDa protein (EC 1.10.2.2) (Mitochondrial hinge protein) (CR7) {Solanum tuberosum}
262830_at	AT1G14700	12	4	I	NC		MC_I	1205.3	851.2	1028.25	P	P	0.000244	0.000244	1786.4	1652.9	1719.65	P	P	0.000244	0.000244	0.6	1.3	0.5	1.1	0.875	0.386221	I	I	I	I	4	-0.5	-0.1	D	NC	AT1G14700	purple acid phosphatase, putative contains Pfam profile: PF00149 calcineurin-like phosphoesterase; similar to purple acid phosphatase (GI:20257479) [Arabidopsis thaliana]
262656_at	AT1G14200	12	4		NC	NC	MC_D	655.7	682.9	669.3	P	P	0.000732	0.001953	477.6	418	447.8	P	P	0.001221	0.00415	-0.5	-0.6	-0.4	-0.4	-0.475	0.0957427	D	D	D	NC	3	0.1	0	NC	NC	AT1G14200	zinc finger (C3HC4-type RING finger) family protein contains Pfam profile: PF00097 zinc finger, C3HC4 type (RING finger)
262648_at	AT1G14030	12	4		NC	NC	MC_I	753.2	848.8	801	P	P	0.00293	0.000732	1344.3	1100.9	1222.6	P	P	0.000732	0.000732	0.7	0.4	0.8	0.3	0.55	0.238048	I	I	I	NC	3	0.3	-0.1	NC	NC	AT1G14030	ribulose-1,5 bisphosphate carboxylase oxygenase large subunit N-methyltransferase, putative strong similarity to SP|P94026 Ribulose-1,5 bisphosphate carboxylase/oxygenase large subunit N- methyltransferase, chloroplast precursor (EC 2.1.1.127) ([Ribulose
259365_at	AT1G13300	12	4		NC	NC	MC_D	1388.3	1060.7	1224.5	P	P	0.000244	0.000244	1047.4	943.4	995.4	P	P	0.000732	0.000732	-0.4	-0.2	-0.4	-0.2	-0.3	0.11547	D	NC	D	D	3	-0.1	-0.1	NC	NC	AT1G13300	myb family transcription factor contains Pfam domain, PF00249: Myb-like DNA-binding domain
259366_at	AT1G13280	12	4		NC	NC	MC_D	2776.2	2498.3	2637.25	P	P	0.000732	0.000244	1834.8	2300.5	2067.65	P	P	0.000732	0.001221	-0.4	-0.3	-0.5	-0.3	-0.375	0.0957427	D	NC	D	D	3	-0.2	0	NC	NC	AT1G13280	allene oxide cyclase family protein similar to ERD12 [GI:15320414], allene oxide cyclase GI:8977961 from [Lycopersicon esculentum]; contains Pfam profile PF06351: Allene oxide cyclase
259363_at	AT1G13270	12	4		NC	NC	MC_I	2696.7	3094.6	2895.65	P	P	0.000732	0.000732	4089.7	3778.6	3934.15	P	P	0.000732	0.000732	0.7	0.5	0.5	0.4	0.525	0.125831	I	I	I	NC	3	0.2	-0.1	NC	NC	AT1G13270	metallopeptidase M24 family protein similar to SP|Q01662 Methionine aminopeptidase 1 precursor (EC 3.4.11.18) {Saccharomyces cerevisiae}; contains Pfam profile PF00557: metallopeptidase family M24
259519_at	AT1G12270	12	4		NC	NC	MC_I	747.8	938.4	843.1	P	P	0.000244	0.000244	1012.7	978.9	995.8	P	P	0.000244	0.000244	0.4	0.3	0.3	0.3	0.325	0.05	I	MI	I	NC	2	0.1	-0.1	NC	NC	AT1G12270	stress-inducible protein, putative similar to sti (stress inducible protein) [Glycine max] GI:872116; contains Pfam profile PF00515 TPR Domain
262825_at	AT1G11790	12	4		NC	NC	MC_I	1227.5	969.5	1098.5	P	P	0.001953	0.00415	1630.1	1401.3	1515.7	P	P	0.000732	0.001221	0.4	0.6	0.3	0.5	0.45	0.129099	I	I	NC	I	3	-0.1	-0.1	NC	NC	AT1G11790	prephenate dehydratase family protein similar to gi|2392772 and is a member of the PF|00800 Prephenate dehydratase family. ESTs gb|T21562 and gb|T21062 come from this gene
261872_s_at	AT1G11520	12	4		NC	NC	MC_I	671	508.9	589.95	P	P	0.000244	0.000244	933.8	980.7	957.25	P	P	0.000244	0.000244	0.4	0.7	0.3	0.5	0.475	0.170783	I	I	NC	I	3	-0.3	-0.1	NC	NC	AT1G11520	pliceosome associated protein-related contains similarity to spliceosome associated protein SAP 145 GI:1173904 from [Homo sapiens]
260465_at	AT1G10910	12	4		NC	NC	MC_I	364.8	431.8	398.3	P	P	0.001221	0.001953	597.7	400.8	499.25	P	P	0.000244	0.000244	0.7	0.6	0.4	0.1	0.45	0.264575	I	I	MI	NC	2	0.2	-0.2	NC	NC	AT1G10910	pentatricopeptide (PPR) repeat-containing protein contains Pfam profile PF01535: PPR repeat
263210_at	AT1G10585	12	4	D		NC	MC_D	972.5	787	879.75	P	P	0.000244	0.000244	287.1	598.1	442.6	P	P	0.000244	0.000244	-1.7	-1.5	-0.6	-0.6	-1.1	0.583095	D	D	D	D	4	-0.1	1.1	NC	I	AT1G10585	expressed protein
263255_at	AT1G10490	12	4		NC	NC	MC_I	553.1	735.9	644.5	P	P	0.000244	0.000244	863	815.1	839.05	P	P	0.000244	0.000244	0.5	0.4	0.4	0.5	0.45	0.057735	I	I	I	NC	3	0	-0.1	NC	NC	AT1G10490	expressed protein contains Pfam profile PF05127: Putative ATPase (DUF699)
264462_at	AT1G10200	12	4		NC	NC	MC_D	3884.4	4064.4	3974.4	P	P	0.000244	0.000244	2861.5	3046.1	2953.8	P	P	0.000244	0.000244	-0.4	-0.3	-0.3	-0.3	-0.325	0.05	D	D	D	NC	3	-0.1	0.1	NC	NC	AT1G10200	transcription factor LIM, putative strong similarity to transcription factor Ntlim1 [Nicotiana tabacum] GI:5689136, LIM domain protein WLIM-1 [Helianthus annuus] GI:5070280; contains Pfam profile PF00412: LIM domain
264678_at	AT1G09760	12	4		NC	NC	MC_I	778.4	894	836.2	P	P	0.000244	0.000244	1124.5	1030.5	1077.5	P	P	0.000244	0.000244	0.5	0.4	0.4	0.3	0.4	0.0816497	I	I	MI	I	3	0	-0.1	NC	NC	AT1G09760	U2 small nuclear ribonucleoprotein A, putative identical to U2 small nuclear ribonucleoprotein A' (U2 snRNP-A') [Arabidopsis thaliana] SWISS-PROT:P43333; supported by cDNA:gi_16649064_gb_AY059902.1_
264652_at	AT1G08920	12	4		NC	NC	MC_I	445.5	411.9	428.7	P	P	0.000244	0.000732	673.5	680.7	677.1	P	P	0.000244	0.000244	0.5	0.7	0.4	0.5	0.525	0.125831	I	I	NC	I	3	-0.2	0	NC	NC	AT1G08920	sugar transporter, putative similar to ERD6 protein {Arabidopsis thaliana} GI:3123712, sugar-porter family proteins 1 and 2 [Arabidopsis thaliana] GI:14585699, GI:14585701; contains Pfam profile PF00083: major facilitator superfamily protein
264808_at	AT1G08770	12	4		NC	NC	MC_D	1673.7	1778.3	1726	P	P	0.000732	0.000244	1101.1	1314.3	1207.7	P	P	0.000732	0.000732	-0.4	-0.6	-0.2	-0.5	-0.425	0.170783	D	D	NC	D	3	0.2	0.1	NC	NC	AT1G08770	prenylated rab acceptor (PRA1) family protein weak similarity to prenylated Rab acceptor 1 (PRA1) [Homo sapiens] GI:4877285; contains Pfam profile PF03208: Prenylated rab acceptor (PRA1)
261810_at	AT1G08130	12	4		NC	NC	MC_I	556.8	681.6	619.2	P	P	0.000244	0.000244	721.4	845.6	783.5	P	P	0.000244	0.000244	0.5	0.4	0.6	0.4	0.475	0.0957427	I	NC	I	I	3	0.2	0.2	NC	NC	AT1G08130	DNA ligase / polydeoxyribonucleotide synthase [ATP] identical to SP|Q42572 DNA ligase (EC 6.5.1.1) (Polydeoxyribonucleotide synthase [ATP]) {Arabidopsis thaliana}; contains Pfam profiles: PF01068 ATP dependent DNA ligase domain, PF04679 ATP dependent DNA
261075_at	AT1G07280	12	4		NC	NC	MC_I	1764.6	2017	1890.8	P	P	0.000244	0.000244	2273.3	2658.3	2465.8	P	P	0.000244	0.000244	0.4	0.3	0.6	0.5	0.45	0.129099	I	NC	I	I	3	0.2	0.3	NC	NC	AT1G07280	expressed protein
256062_at	AT1G07090	12	4	D		NC	MC_D	3322.7	3102.2	3212.45	P	P	0.000244	0.000244	1394.2	1970.1	1682.15	P	P	0.001221	0.000732	-1	-1.2	-0.5	-0.6	-0.825	0.330404	D	D	D	D	4	0.1	0.5	NC	I	AT1G07090	expressed protein contains Pfam profile PF04852: Protein of unknown function (DUF640)
260815_at	AT1G06950	12	4		NC	NC	MC_I	2680.6	3110.1	2895.35	P	P	0.000244	0.000244	3934	3499.7	3716.85	P	P	0.000244	0.000244	0.6	0.4	0.5	0.2	0.425	0.170783	I	I	I	NC	3	0.2	-0.2	NC	NC	AT1G06950	chloroplast inner envelope protein-related similar to chloroplast inner envelope protein GI:1495767 from [Pisum sativum]
260830_at	AT1G06760	12	4		NC	NC	MC_I	4375.7	3836	4105.85	P	P	0.000244	0.000244	5307.1	5443.6	5375.35	P	P	0.000244	0.000244	0.3	0.5	0.2	0.3	0.325	0.125831	I	I	NC	I	3	-0.1	-0.1	NC	NC	AT1G06760	histone H1, putative similar to histone H1-1 GB:CAA44312 GI:16314 from [Arabidopsis thaliana]; identical to cDNA H1-1C mRNA for histone H1-1 (partial) GI:732560
259396_at	AT1G06390	12	4		NC	NC	MC_I	954.7	973.4	964.05	P	P	0.000732	0.000732	1301.4	1207.9	1254.65	P	P	0.000732	0.000244	0.4	0.3	0.3	0.3	0.325	0.05	I	I	NC	I	3	0	0.1	NC	NC	AT1G06390	shaggy-related protein kinase iota / ASK-iota (ASK9) (GSK1) identical to shaggy-related protein kinase iota (ASK-iota) [Arabidopsis thaliana] SWISS-PROT:Q39012
259391_s_at	AT1G06350	12	4		NC	NC	MC_I	577.4	744.5	660.95	P	P	0.000244	0.000244	1102	1014.3	1058.15	P	P	0.000244	0.000244	0.9	0.8	0.5	0.5	0.675	0.206155	I	I	MI	NC	2	0.2	-0.3	NC	NC	AT1G06350	fatty acid desaturase family protein similar to delta 9 acyl-lipid desaturase (ADS1) GI:2970034 from [Arabidopsis thaliana]
260786_s_at	AT1G06220;AT5G25230	12	4		NC	NC	MC_I	1442	1848.4	1645.2	P	P	0.000244	0.000244	1987	2465.9	2226.45	P	P	0.000244	0.000244	0.4	0.1	0.6	0.4	0.375	0.206155	I	NC	I	I	3	0.2	0.2	NC	NC	AT1G06220;AT5G25230	[AT1G06220, elongation factor Tu family protein similar to Cryptosporidium parvum elongation factor-2 GB:U21667 GI:706974 from [Cryptosporidium parvum]];[AT5G25230, elongation factor Tu family protein translation Elongation Factor 2, Schizosaccharomyces
260783_at	AT1G06160	12	4	D		NC	MC_D	1763.3	1869.6	1816.45	P	P	0.000732	0.000732	927.7	1301	1114.35	P	P	0.000244	0.000732	-1	-1.2	-0.4	-0.5	-0.775	0.386221	D	D	D	D	4	0.1	0.6	NC	I	AT1G06160	ethylene-responsive factor, putative similar to ethylene response factor 1 GB:AAD03544 GI:4128208 from [Arabidopsis thaliana]
263181_at	AT1G05720	12	4		NC	NC	MC_D	2464.9	2263.7	2364.3	P	P	0.000244	0.000244	1740.3	1628.5	1684.4	P	P	0.000244	0.000244	-0.5	-0.3	-0.7	-0.5	-0.5	0.163299	D	MD	D	MD	2	-0.3	-0.1	NC	NC	AT1G05720	selenoprotein family protein contains Prosite PS00190: Cytochrome c family heme-binding site signature; similar to 15 kDa selenoprotein (GI:12314088) {Homo sapiens}
263231_at	AT1G05680	10	4	I		NC	MC_I	486.9	428.1	457.5	P	P	0.018555	0.018555	837	1425.1	1131.05	P	P	0.001221	0.000732	1.1	0.9	1.9	1.7	1.4	0.476095	I	I	I	I	4	-0.2	0.8	NC	I	AT1G05680	UDP-glucoronosyl/UDP-glucosyl transferase family protein contains Pfam profile: PF00201 UDP-glucoronosyl and UDP-glucosyl transferase
263180_at	AT1G05620	12	4		NC	NC	MC_D	2287.2	2379.9	2333.55	P	P	0.000244	0.000244	1802.1	1819.2	1810.65	P	P	0.000244	0.000244	-0.3	-0.5	-0.4	-0.3	-0.375	0.0957427	D	D	NC	MD	2	0	0	NC	NC	AT1G05620	inosine-uridine preferring nucleoside hydrolase family protein similar to Chain A, Crystal Structure Of Nucleoside Hydrolase From Leishmania MajorGI:8569431; contains Pfam profile PF01156: Inosine-uridine preferring nucleoside hydrolase
264609_at	AT1G04530	12	4		NC	NC	MC_I	1328.3	1200.1	1264.2	P	P	0.000732	0.000732	1877.1	1831	1854.05	P	P	0.000244	0.000732	0.4	0.6	0.1	0.5	0.4	0.216025	I	I	NC	I	3	-0.3	-0.1	NC	NC	AT1G04530	expressed protein
263678_at	AT1G04420	12	4		NC	NC	MC_I	3106.1	2912.7	3009.4	P	P	0.000732	0.000732	4753.5	3706.3	4229.9	P	P	0.000244	0.000732	0.5	0.8	0.4	0.6	0.575	0.170783	I	I	NC	I	3	-0.3	-0.1	NC	NC	AT1G04420	aldo/keto reductase family protein Similar to SP|Q46933 Tas protein {Escherichia coli}, Babesia aldo-keto reductase SP|P40690; contains Pfam profile PF00248: oxidoreductase, aldo/keto reductase family
265036_at	AT1G04080	12	4		NC	NC	MC_I	1454.9	1590.8	1522.85	P	P	0.000244	0.000244	1918.2	1978.3	1948.25	P	P	0.000244	0.000244	0.5	0.2	0.5	0.3	0.375	0.15	I	NC	I	MI	2	0.2	0	NC	NC	AT1G04080	hydroxyproline-rich glycoprotein family protein Contains similarity to pre-mRNA processing protein PRP39 gb L29224 from S. cerevisiae. ESTs gb|R64908 and gb|T88158, gb|N38703 and gb|AA651043 come from this gene
265042_at	AT1G04040	12	4		NC	NC	MC_D	7796.5	9267.6	8532.05	P	P	0.000244	0.000244	6779.8	6506.4	6643.1	P	P	0.000244	0.000244	-0.2	-0.5	-0.2	-0.6	-0.375	0.206155	NC	D	D	D	1	0.3	-0.1	NC	NC	AT1G04040	acid phosphatase class B family protein similar to SP|P15490 STEM 28 kDa glycoprotein precursor (Vegetative storage protein A) {Glycine max}, acid phosphatase [Glycine max] GI:3341443; contains Pfam profile PF03767: HAD superfamily (subfamily IIIB) phosp
264839_at	AT1G03630	12	4		NC	NC	MC_I	3976.4	3550.9	3763.65	P	P	0.000244	0.000244	5390.8	4342.3	4866.55	P	P	0.000244	0.000244	0.4	0.6	0.2	0.4	0.4	0.163299	I	I	NC	I	3	-0.2	-0.3	NC	NC	AT1G03630	protochlorophyllide reductase C, chloroplast / PCR C / NADPH-protochlorophyllide oxidoreductase C (PORC) identical to SP:O48741 protochlorophyllide reductase C, chloroplast precursor (EC 1.3.1.33) (PCR C) (NADPH-protochlorophyllide oxidoreductase C) (POR
264357_at	AT1G03360	12	4		NC	NC	MC_I	571.1	563.3	567.2	P	P	0.001953	0.00293	769.8	689.9	729.85	P	P	0.001221	0.00415	0.6	0.6	0.3	0.3	0.45	0.173205	I	I	NC	I	3	-0.1	-0.1	NC	NC	AT1G03360	exonuclease family protein similar to Exosome complex exonuclease RRP4 (Ribosomal RNA processing protein 4)(SP:P38792) {Saccharomyces cerevisiae}
264360_at	AT1G03310	12	4		NC	NC	MC_D	1231.8	1681.3	1456.55	P	P	0.000244	0.000244	1159.9	969.2	1064.55	P	P	0.000244	0.000244	-0.1	-0.4	-0.4	-0.6	-0.375	0.206155	NC	D	D	D	1	0.3	-0.3	NC	NC	AT1G03310	isoamylase, putative / starch debranching enzyme, putative similar to isoamylase isoform 2 [Solanum tuberosum] GI:27728147, isoamylase from [Triticum aestivum] GI:17932898, [Hordeum vulgare] GI:21314275, [Oryza sativa] GI:3252794; contains Pfam profiles
264368_at	AT1G03280	12	4		NC	NC	MC_I	614.3	825	719.65	P	P	0.000244	0.000244	997.1	930.3	963.7	P	P	0.000244	0.000244	0.5	0.3	0.4	0.3	0.375	0.0957427	I	MI	I	NC	2	0.3	-0.1	NC	NC	AT1G03280	transcription initiation factor IIE (TFIIE) alpha subunit family protein / general transcription factor TFIIE family protein contains Pfam profile: PF02002 TFIIE alpha subunit
263119_at	AT1G03110	12	4		NC	NC	MC_I	500.4	667.1	583.75	P	P	0.001953	0.001221	810.3	804.6	807.45	P	P	0.000732	0.000732	0.5	0.3	0.6	0.4	0.45	0.129099	I	NC	I	I	3	0.2	0.2	NC	NC	AT1G03110	transducin family protein / WD-40 repeat family protein contains 4 WD-40 repeats (PF00400); similar to WD-repeat domain 4 protein (GI:9955698) [Mus musculus]
262104_at	AT1G02910	12	4		NC	NC	MC_I	802.5	855.1	828.8	P	P	0.01416	0.01416	1075.5	1139.6	1107.55	P	P	0.010742	0.010742	0.3	0.1	0.6	0.4	0.35	0.208167	I	MI	I	I	3	0.1	0.2	NC	NC	AT1G02910	tetratricopeptide repeat (TPR)-containing protein contains Pfam profile PF00515: TPR Domain
262112_at	AT1G02870	12	4		NC	NC	MC_I	1783.1	1787.9	1785.5	P	P	0.001221	0.001221	2298.9	2029.5	2164.2	P	P	0.000244	0.000732	0.4	0.2	0.3	0.3	0.3	0.0816497	I	I	I	NC	3	0	0	NC	NC	AT1G02870	expressed protein
261048_at	AT1G01420	12	4		NC	NC	MC_D	430.4	604.9	517.65	P	P	0.005859	0.00415	262.9	400.9	331.9	P	P	0.008057	0.008057	-0.7	-0.8	-0.5	-0.6	-0.65	0.129099	D	D	NC	D	3	0	0.2	NC	NC	AT1G01420	UDP-glucoronosyl/UDP-glucosyl transferase family protein contains Pfam profile: PF00201 UDP-glucoronosyl and UDP-glucosyl transferase
261057_at	AT1G01230	12	4		NC	NC	MC_D	2144.2	1875.8	2010	P	P	0.000244	0.000244	1513.7	1684.9	1599.3	P	P	0.000244	0.000244	-0.4	-0.3	-0.3	-0.2	-0.3	0.0816497	D	D	D	NC	3	-0.1	0.2	NC	NC	AT1G01230	ORMDL family protein contains Pfam domain PF04061: ORMDL family
260404_at		12	4		NC	NC	MC_I	177.4	183.7	180.55	P	P	0.000732	0.001221	291.8	234.8	263.3	P	P	0.000244	0.000244	0.6	0.5	0.8	-0.1	0.45	0.387298	I	I	I	NC	3	0.2	-0.1	NC	NC
AFFX-r2-At-GAPDH-3_s_at		12	4		NC	NC	MC_D	26681.1	29065.6	27873.3	P	P	0.000244	0.000244	23554.3	21018.1	22286.2	P	P	0.000244	0.000244	-0.2	-0.4	-0.2	-0.4	-0.3	0.11547	D	D	NC	D	3	0.2	0	NC	NC
AFFX-r2-At-GAPDH-5_s_at		12	4		NC	NC	MC_D	25451.5	28165.8	26808.7	P	P	0.000244	0.000244	20212.6	19840.2	20026.4	P	P	0.000244	0.000244	-0.3	-0.6	-0.3	-0.5	-0.425	0.15	D	D	NC	D	3	0.2	0	NC	NC
AFFX-r2-At-Ubq-5_x_at		12	4		NC	NC	MC_D	21606	28552.9	25079.5	P	P	0.000244	0.000244	14955.7	13030.8	13993.2	P	P	0.000244	0.000244	-0.3	-0.5	-0.2	-0.4	-0.35	0.129099	D	D	NC	D	3	0.2	0	NC	NC

## Sheet: CYCD3_14d
probe_ID_25K	locus	P_call_cycD3_all	P_call_cycD3_14d	robust change call_cycD3_14d	NC_cycD3_14d (dupl)	NC_EV (cycD3)_14d (dupl)	Modulated Candidate	EV_14d_19A_Signal	EV_14d_19B_Signal	EV_14d_19_average_Signal	EV_14d_19A_Detection	EV_14d_19B_Detection	EV_14d_19A_Detection p-value	EV_14d_19B_Detection p-value	D3_14d_25A_Signal	D3_14d_25B_Signal	D3_14d_25_average_Signal	D3_14d_25A_Detection	D3_14d_25B_Detection	D3_14d_25A_Detection p-value	D3_14d_25B_Detection p-value	C42_25A_v_19A_Signal Log Ratio	C43_25A_v_19B_Signal Log Ratio	C44_25B_v_19A_Signal Log Ratio	C45_25B_v_19B_Signal Log Ratio	average_SLR_14d_D3_vs_EV	StDev_SLR_14d_D3_vs_EV	C42_25A_v_19A_Change	C43_25A_v_19B_Change	C44_25B_v_19A_Change	C45_25B_v_19B_Change	change call_all_comparison_14d	C17_19B_v_19A_Signal Log Ratio	C48_25B_v_25A_Signal Log Ratio	C17_19B_v_19A_Change	C48_25B_v_25A_Change	affy25k_array_elements-2004-04-_locus	description
244929_at	ATMG00580	12	4		NC	NC	MC_D	961.6	725.4	843.5	P	P	0.018555	0.030273	450.6	708.9	579.75	P	P	0.037598	0.018555	-0.6	-0.5	-0.4	-0.1	-0.4	0.216025	D	D	D	NC	3	-0.1	0.4	NC	NC	ATMG00580	nad4 NADH dehydrogenase subunit 4
244961_at	ATCG01040	12	4	D		NC	MC_D	8538.2	8526.1	8532.15	P	P	0.000244	0.000244	6688.7	4748.8	5718.75	P	P	0.000244	0.000244	-0.3	-0.3	-0.8	-0.8	-0.55	0.288675	D	D	D	D	4	0.1	-0.4	NC	D	ATCG01040	ycf5 hypothetical protein
244986_at	ATCG00820	12	4		NC	NC	MC_D	13269	12079.3	12674.1	P	P	0.000244	0.000244	11019.6	9737.8	10378.7	P	P	0.000244	0.000244	-0.3	-0.1	-0.6	-0.4	-0.35	0.208167	D	NC	D	D	3	-0.2	-0.3	NC	NC	ATCG00820	rps19 ribosomal protein S19
244978_at	ATCG00740	12	4		NC	NC	MC_D	12698.6	13645.3	13172	P	P	0.000244	0.000244	10262.6	10787.1	10524.9	P	P	0.000244	0.000244	-0.4	-0.3	-0.6	-0.4	-0.425	0.125831	NC	D	D	D	1	0.1	-0.2	NC	NC	ATCG00740	rpoA RNA polymerase alpha subunit
244971_at	ATCG00670	12	4		NC	NC	MC_D	21183.8	18960.1	20072	P	P	0.000244	0.000244	17525.3	15385.2	16455.2	P	P	0.000244	0.000244	-0.3	-0.1	-0.5	-0.3	-0.3	0.163299	D	NC	D	D	3	-0.2	-0.2	NC	NC	ATCG00670	clpP ATP-dependent protease subunit
244970_at	ATCG00660	12	4	D	NC		MC_D	1519.2	1137.7	1328.45	P	P	0.000244	0.000244	759.7	610.4	685.05	P	P	0.000244	0.000732	-1	-0.5	-1.2	-0.8	-0.875	0.298608	D	D	D	D	4	-0.3	-0.2	D	NC	ATCG00660	rpl20 ribosomal protein L20
245015_at	ATCG00490	12	4	D	NC		MC_D	4616.3	3824.6	4220.45	P	P	0.000244	0.000244	2692.4	2818.9	2755.65	P	P	0.000244	0.000244	-0.8	-0.4	-0.9	-0.5	-0.65	0.238048	D	D	D	D	4	-0.5	-0.1	D	NC	ATCG00490	rbcL large subunit of riblose-1,5-bisphosphate carboxylase/oxygenase
245013_at	ATCG00470	12	4		NC	NC	MC_D	44506.7	46796.6	45651.7	P	P	0.000244	0.000244	38787.8	39044.3	38916.1	P	P	0.000244	0.000244	-0.2	-0.3	-0.2	-0.2	-0.225	0.05	MD	D	NC	D	1	0.1	0	NC	NC	ATCG00470	atpE ATPase epsilon subunit
245010_at	ATCG00420	12	4	D		NC	MC_D	2986.8	2946.5	2966.65	P	P	0.000244	0.000244	1771.4	1186.3	1478.85	P	P	0.000732	0.000244	-0.7	-0.6	-1.2	-1.1	-0.9	0.294392	D	D	D	D	4	0	-0.5	NC	D	ATCG00420	ndhJ NADH dehydrogenase subunit
245000_at	ATCG00210	12	4		NC	NC	MC_D	877.4	772.4	824.9	P	P	0.005859	0.010742	365	517.2	441.1	P	P	0.018555	0.018555	-1.3	-1	-0.8	-0.4	-0.875	0.377492	D	D	D	MD	3	-0.3	0.3	NC	NC	ATCG00210	ycf6 hypothetical protein
247091_at	AT5G66390	12	4		NC	NC	MC_D	558.8	466.5	512.65	P	P	0.000732	0.000244	339.6	357.1	348.35	P	P	0.000732	0.000244	-0.8	-0.5	-0.4	-0.2	-0.475	0.25	D	D	D	NC	3	-0.5	0.4	NC	NC	AT5G66390	peroxidase 72 (PER72) (P72) (PRXR8) identical to SP|Q9FJZ9 Peroxidase 72 precursor (EC 1.11.1.7) (Atperox P72) (PRXR8) (ATP6a) {Arabidopsis thaliana}
247120_at	AT5G65990;AT5G66000	12	4		NC	NC	MC_I	1465.2	1693.4	1579.3	P	P	0.000244	0.000244	2221	1925.1	2073.05	P	P	0.000244	0.000244	0.4	0.2	0.6	0.3	0.375	0.170783	I	NC	I	I	3	0.3	0	NC	NC	AT5G65990;AT5G66000	[AT5G65990, amino acid transporter family protein similar to proton/amino acid transporter 1 [Mus musculus] GI:21908024; contains Pfam profile PF01490: Transmembrane amino acid transporter protein];[AT5G66000, expressed protein]
247170_at	AT5G65530	11	4		NC	NC	MC_D	239.6	259.2	249.4	P	P	0.01416	0.01416	152.2	180.3	166.25	P	P	0.023926	0.023926	-0.4	-0.7	-0.5	-0.7	-0.575	0.15	D	D	MD	D	3	0.1	0.4	NC	NC	AT5G65530	protein kinase, putative contains protein kinase domain, Pfam:PF00069
247192_at	AT5G65360	12	4		NC	NC	MC_I	5705.5	5657.1	5681.3	P	P	0.000244	0.000244	9139.7	6884.4	8012.05	P	P	0.000244	0.000244	0.5	0.6	0.3	0.3	0.425	0.15	I	I	NC	I	3	0	-0.2	NC	NC	AT5G65360	histone H3 identical to histone H3 from Zea mays SP|P05203, Medicago sativa GI:166384, Encephalartos altensteinii SP|P08903, Pisum sativum SP|P02300; contains Pfam profile PF00125 Core histone H2A/H2B/H3/H4
247199_at	AT5G65210	12	4	D	NC		MC_D	1830.8	1529.4	1680.1	P	P	0.000244	0.000244	1286.7	1169.8	1228.25	P	P	0.000244	0.000244	-0.7	-0.4	-0.8	-0.4	-0.575	0.206155	D	D	D	D	4	-0.4	0	D	NC	AT5G65210	bZIP family transcription factor (TGA1) identical to transcription factor (TGA1) GI:16550 from [Arabidopsis thaliana]
247214_at	AT5G64850	12	4		NC	NC	MC_D	1264.4	1163.8	1214.1	P	P	0.000244	0.000244	804.4	978.2	891.3	P	P	0.000244	0.000244	-0.6	-0.5	-0.4	-0.2	-0.425	0.170783	D	D	D	NC	3	-0.2	0.3	NC	NC	AT5G64850	expressed protein
247247_at	AT5G64650	12	4		NC	NC	MC_I	765.9	969	867.45	P	P	0.000244	0.000244	1302.4	1183.7	1243.05	P	P	0.000244	0.000244	0.6	0.4	0.5	0.4	0.475	0.0957427	I	I	I	NC	3	0.1	0	NC	NC	AT5G64650	ribosomal protein L17 family protein contains Pfam profile: PF01196 ribosomal protein L17
247266_at	AT5G64570	12	4		NC	NC	MC_I	2798.5	2774.7	2786.6	P	P	0.000244	0.000244	3790.8	4016.8	3903.8	P	P	0.000244	0.000244	0.4	0.2	0.5	0.4	0.375	0.125831	I	NC	I	I	3	0.2	0	NC	NC	AT5G64570	glycosyl hydrolase family 3 protein
247279_at	AT5G64310	12	4		NC	NC	MC_I	2023.4	2052.7	2038.05	P	P	0.001221	0.001221	2568.2	2427.4	2497.8	P	P	0.000732	0.000732	0.3	0.4	0.2	0.3	0.3	0.0816497	I	I	NC	I	3	-0.1	-0.2	NC	NC	AT5G64310	arabinogalactan-protein (AGP1) identical to gi:3883120 gb:AAC77823
247327_at	AT5G64120	12	4	I		NC	MC_I	2006.9	1842.3	1924.6	P	P	0.000244	0.000244	3455.4	5632.9	4544.15	P	P	0.000244	0.000244	0.8	0.9	1.6	1.6	1.225	0.434933	I	I	I	I	4	0	0.7	NC	I	AT5G64120	peroxidase, putative identical to peroxidase [Arabidopsis thaliana] gi|1483222|emb|CAA67551
247452_at	AT5G62430	12	4		NC	NC	MC_D	1008.4	1013.4	1010.9	P	P	0.00415	0.00293	630.3	663.6	646.95	P	P	0.00415	0.00293	-0.7	-0.8	-0.4	-0.5	-0.6	0.182574	D	D	NC	D	3	0.1	0.1	NC	NC	AT5G62430	Dof-type zinc finger domain-containing protein similar to H-protein promoter binding factor-2a GI:3386546 from [Arabidopsis thaliana]
247470_at	AT5G62220	12	4		NC	NC	MC_D	1328.7	1233.4	1281.05	P	P	0.000244	0.000244	1142.5	1110.8	1126.65	P	P	0.000244	0.000244	-0.3	-0.2	-0.5	-0.3	-0.325	0.125831	D	NC	D	D	3	-0.2	-0.1	NC	NC	AT5G62220	exostosin family protein contains Pfam profile: PF03016 Exostosin family
247528_at	AT5G61460	12	4		NC	NC	MC_I	202.6	170	186.3	P	P	0.000244	0.00293	370.3	332.9	351.6	P	P	0.037598	0.000244	0.6	1	0.5	0.5	0.65	0.238048	NC	I	I	I	1	-0.1	0.1	NC	NC	AT5G61460	structural maintenance of chromosomes (SMC) family protein very strong similarity to SMC-like protein (MIM) [Arabidopsis thaliana] GI:5880614; contains Pfam profile PF02463: RecF/RecN/SMC N terminal domain
247585_at	AT5G60680	12	4		NC	NC	MC_I	1404.2	1671.9	1538.05	P	P	0.000244	0.000244	1940.6	2078.7	2009.65	P	P	0.000244	0.000244	0.4	0.2	0.5	0.2	0.325	0.15	I	NC	I	I	3	0.3	0.1	NC	NC	AT5G60680	expressed protein contains Pfam profile PF04520: Protein of unknown function, DUF584
247651_at	AT5G59870	12	4		NC	NC	MC_I	6577.6	6814.3	6695.95	P	P	0.008057	0.001953	9028.3	8373.1	8700.7	P	P	0.001953	0.001953	0.5	0.3	0.3	0.2	0.325	0.125831	I	I	I	NC	3	0	-0.1	NC	NC	AT5G59870	histone H2A, putative similar to histone H2A Petroselinum crispum SP|P19177, Lycopersicon esculentum SP|P25469, Zea mays SP|P40280; contains Pfam profile PF00125 Core histone H2A/H2B/H3/H4
247694_at	AT5G59750	12	4		NC	NC	MC_D	1805.5	2081.1	1943.3	P	P	0.000244	0.000244	1656	1514.1	1585.05	P	P	0.000244	0.000244	-0.4	-0.5	-0.3	-0.4	-0.4	0.0816497	NC	D	D	D	1	0	0.1	NC	NC	AT5G59750	riboflavin biosynthesis protein, putative similar to SP|P50855 Riboflavin biosynthesis protein ribA [Includes: GTP cyclohydrolase II (EC 3.5.4.25); 3,4-dihydroxy-2-butanone 4-phosphate synthase (DHBP synthase)] {Actinobacillus pleuropneumoniae}; contains
247678_at	AT5G59520	12	4		NC	NC	MC_D	3774.6	3231.8	3503.2	P	P	0.000244	0.000244	2598	3101.1	2849.55	P	P	0.000244	0.000244	-0.5	-0.3	-0.3	-0.1	-0.3	0.163299	D	D	D	NC	3	-0.2	0.1	NC	NC	AT5G59520	zinc transporter (ZIP2) identical to zinc transporter ZIP2 [Arabidopsis thaliana] gi|3252868|gb|AAC24198; member of the Zinc (Zn2+)-Iron (Fe2+) permease (ZIP) family, PMID:11500563
247717_at	AT5G59320	12	4	I		NC	MC_I	699.5	602.7	651.1	P	P	0.000244	0.000244	1969.9	2250.7	2110.3	P	P	0.000244	0.000244	1.6	1.6	1.8	2	1.75	0.191485	I	I	I	I	4	-0.2	0.4	NC	I	AT5G59320	lipid transfer protein 3 (LTP3) identical to lipid transfer protein 3 from Arabidopsis thaliana [gi:8571921]; contains Pfam protease inhibitor/seed storage/LTP family domain PF00234
247718_at	AT5G59310	12	4	I		NC	MC_I	355.3	290.3	322.8	P	P	0.000732	0.01416	1505.9	2030	1767.95	P	P	0.000244	0.000244	1.4	2.3	2.2	2.9	2.2	0.616441	I	I	I	I	4	-0.6	0.6	NC	I	AT5G59310	lipid transfer protein 4 (LTP4) identical to lipid transfer protein 4 from Arabidopsis thaliana [gi:8571923]; contains Pfam protease inhibitor/seed storage/LTP family domain PF00234
247765_at	AT5G58860	12	4		NC	NC	MC_D	1368.8	1117.7	1243.25	P	P	0.000244	0.000244	778.8	832.5	805.65	P	P	0.000244	0.000244	-0.8	-0.4	-0.7	-0.3	-0.55	0.238048	D	D	D	NC	3	-0.4	0.1	NC	NC	AT5G58860	cytochrome P450 86A1 (CYP86) (CYP86A1) / CYPLXXXVI / P450-dependent fatty acid omega-hydroxylase identical to Cytochrome P450 86A1 (CYPLXXXVI) (P450-dependent fatty acid omega-hydroxylase) (SP:P48422) [Arabidopsis thaliana]
247800_at	AT5G58560;AT5G58570	12	4	I	NC		MC_I	219.3	354.3	286.8	P	P	0.00293	0.000732	469.2	522.2	495.7	P	P	0.000244	0.000244	1.1	0.3	1.1	0.5	0.75	0.412311	I	I	I	I	4	0.5	0.1	I	NC	AT5G58560;AT5G58570	[AT5G58560, phosphatidate cytidylyltransferase family protein contains Pfam profile: PF01148 phosphatidate cytidylyltransferase];[AT5G58570, expressed protein]
247817_at	AT5G58375	12	4		NC	NC	MC_I	3973.3	4596.6	4284.95	P	P	0.000244	0.000244	5118.3	5715.6	5416.95	P	P	0.000244	0.000244	0.2	0.2	0.3	0.4	0.275	0.0957427	I	NC	I	I	3	0	0.2	NC	NC	AT5G58375	expressed protein
247925_at	AT5G57560	12	4	I		NC	MC_I	732.3	610.8	671.55	P	P	0.000244	0.000244	1259.3	1940.6	1599.95	P	P	0.000244	0.000244	0.8	1	1.3	1.7	1.2	0.391578	I	I	I	I	4	-0.2	0.6	NC	I	AT5G57560	xyloglucan:xyloglucosyl transferase / xyloglucan endotransglycosylase / endo-xyloglucan transferase (TCH4) identical to xyloglucan endotransglycosylase TCH4 protein GI:886116
247903_at	AT5G57340	12	4		NC	NC	MC_I	308	252.8	280.4	P	P	0.000244	0.000244	417.5	486.9	452.2	P	P	0.000244	0.000732	0.4	0.5	0.7	0.4	0.5	0.141421	I	I	NC	I	3	0.2	0.2	NC	NC	AT5G57340	expressed protein
247926_at	AT5G57280	12	4		NC	NC	MC_I	1218.5	985.1	1101.8	P	P	0.000244	0.000244	1367.9	1362.5	1365.2	P	P	0.000244	0.000244	0.3	0.4	0.2	0.3	0.3	0.0816497	I	I	NC	I	3	-0.1	0	NC	NC	AT5G57280	expressed protein
247936_at	AT5G57030	12	4		NC	NC	MC_D	3010.4	2869.6	2940	P	P	0.000244	0.000244	2438.6	2351.1	2394.85	P	P	0.000244	0.000244	-0.3	-0.3	-0.3	-0.5	-0.35	0.1	NC	D	D	D	1	0.1	-0.2	NC	NC	AT5G57030	lycopene epsilon cyclase identical to lycopene epsilon cyclase [GI:1399181]
248060_at	AT5G55560	11	4		NC	NC	MC_I	216.3	237.9	227.1	P	P	0.046143	0.023926	302.3	395.4	348.85	P	P	0.001221	0.001953	0.5	0.4	1.1	0.8	0.7	0.316228	I	NC	I	I	3	0.2	0.4	NC	NC	AT5G55560	protein kinase family protein contains protein kinase domain, Pfam:PF00069
248058_at	AT5G55530	12	4		NC	NC	MC_I	1467.1	1506	1486.55	P	P	0.000244	0.000244	2046	1904.7	1975.35	P	P	0.000244	0.000244	0.3	0.5	0.3	0.5	0.4	0.11547	NC	I	I	I	1	-0.2	0	NC	NC	AT5G55530	C2 domain-containing protein low similarity to cold-regulated gene SRC2 [Glycine max] GI:2055230; contains Pfam profile PF00168: C2 domain
248252_at	AT5G53250	12	4		NC	NC	MC_D	658.6	494.2	576.4	P	P	0.000244	0.000244	252.4	327	289.7	P	P	0.001953	0.000244	-1.4	-1.1	-0.8	-0.3	-0.9	0.469042	D	D	D	NC	3	-0.4	0.6	NC	NC	AT5G53250	arabinogalactan-protein, putative (AGP22) similar to arabinogalactan protein [Arabidopsis thaliana] gi|10880509|gb|AAG24284
248246_at	AT5G53200	12	4		NC	NC	MC_D	548.3	401.2	474.75	P	P	0.000244	0.000244	281	245.3	263.15	P	P	0.000244	0.000244	-0.9	-0.5	-0.7	-0.5	-0.65	0.191485	D	MD	D	NC	2	-0.4	0.1	NC	NC	AT5G53200	myb family transcription factor (TRIPTYCHON) contains Pfam profile: PF00249 myb-like DNA-binding domain
248341_at	AT5G52220	12	4		NC	NC	MC_I	222.3	187.1	204.7	P	P	0.001221	0.00293	298.2	318.6	308.4	P	P	0.000732	0.000244	0.6	0.5	0.6	0.5	0.55	0.057735	MI	I	I	I	1	-0.3	0.1	NC	NC	AT5G52220	expressed protein ; expression supported by MPSS
248402_at	AT5G52100	12	4		NC	NC	MC_D	1401.6	1759.2	1580.4	P	P	0.001953	0.000732	1190.5	1008.8	1099.65	P	P	0.001953	0.001953	-0.4	-0.5	-0.5	-0.7	-0.525	0.125831	NC	D	D	D	1	0.2	-0.3	NC	NC	AT5G52100	dihydrodipicolinate reductase family protein weak similarity to dihydrodipicolinate reductase [Corynebacterium glutamicum] GI:311768; contains Pfam profiles PF01113: Dihydrodipicolinate reductase N-terminus, PF05173: Dihydrodipicolinate reductase C-termi
248541_at	AT5G50180	12	4		NC	NC	MC_D	1142.6	1082.6	1112.6	P	P	0.000732	0.000732	954.1	754.5	854.3	P	P	0.000732	0.000732	-0.4	-0.3	-0.6	-0.4	-0.425	0.125831	D	NC	D	D	3	-0.1	-0.2	NC	NC	AT5G50180	protein kinase, putative similar to protein kinase ATN1 [Arabidopsis thaliana] gi|1054633|emb|CAA63387
248597_at	AT5G49160	12	4		NC	NC	MC_I	996.5	1193.7	1095.1	P	P	0.000244	0.000244	1487.9	1175	1331.45	P	P	0.000244	0.000244	0.7	0.5	0.5	0.3	0.5	0.163299	I	I	I	NC	3	0.1	-0.3	NC	NC	AT5G49160	DNA (cytosine-5-)-methyltransferase (ATHIM) identical to SP|P34881 DNA (cytosine-5)-methyltransferase AthI (EC 2.1.1.37) {Arabidopsis thaliana}
248632_at	AT5G49010	12	4		NC	NC	MC_I	544.8	599.7	572.25	P	P	0.000244	0.000244	916.5	856.6	886.55	P	P	0.000244	0.000244	0.6	0.6	0.5	0.3	0.5	0.141421	I	I	I	NC	3	0.2	-0.3	NC	NC	AT5G49010	DNA replication protein-related similar to Sld5 [Xenopus laevis] GI:29365477; contains Pfam profile PF05916: Eukaryotic protein of unknown function (DUF873)
248681_at	AT5G48900	12	4		NC	NC	MC_D	1519.3	1524.9	1522.1	P	P	0.000732	0.000732	1120.3	912	1016.15	P	P	0.000732	0.000244	-0.4	-0.5	-0.4	-0.4	-0.425	0.05	D	D	NC	D	3	0.1	0.1	NC	NC	AT5G48900	pectate lyase family protein similar to pectate lyase GP:14531296 from [Fragaria x ananassa]; non-consensus AG donor splice site at exon 2
248713_at	AT5G48180	12	4		NC	NC	MC_I	2491.1	1962.1	2226.6	P	P	0.000732	0.000244	2809.2	2987.9	2898.55	P	P	0.000244	0.000244	0.2	0.5	0.4	0.5	0.4	0.141421	NC	I	I	I	1	-0.1	0.1	NC	NC	AT5G48180	kelch repeat-containing protein contains Pfam PF01344: Kelch motif (5 repeats) ;similar to Tip elongation aberrant protein 1 (Cell polarity protein tea1) (SP:P87061) [Schizosaccharomyces pombe]
248729_at	AT5G48010	12	4		NC	NC	MC_I	1683.8	1671.7	1677.75	P	P	0.000732	0.000244	2245.1	1815.8	2030.45	P	P	0.000244	0.000244	0.3	0.4	0.2	0.4	0.325	0.0957427	I	I	MI	I	3	0	-0.1	NC	NC	AT5G48010	pentacyclic triterpene synthase, putative similar to pentacyclic triterpene synthase [gi:6650207] [PMID: 11247608] Contains Pfam domain PF00432: Prenyltransferase and squalene oxidase repeat
248728_at	AT5G48000	12	4		NC	NC	MC_I	1992.8	1927.4	1960.1	P	P	0.000244	0.000244	2385.4	2609	2497.2	P	P	0.000732	0.000244	0.3	0.5	0.4	0.5	0.425	0.0957427	NC	I	I	I	1	-0.2	0	NC	NC	AT5G48000	cytochrome P450 family protein similar to steroid 22-alpha-hydroxylase; DWF4; CYP90B1 (GI:2935342) [Arabidopsis thaliana]
248812_at	AT5G47330	12	4		NC	NC	MC_I	229.3	192.5	210.9	P	P	0.018555	0.030273	314.6	478	396.3	P	P	0.00415	0.005859	0.3	0.5	0.9	0.8	0.625	0.275379	NC	I	I	I	1	-0.1	0.3	NC	NC	AT5G47330	palmitoyl protein thioesterase family protein
248818_at	AT5G47040	12	4		NC	NC	MC_D	1917.4	1856.7	1887.05	P	P	0.000244	0.000244	1316.4	1752.3	1534.35	P	P	0.000244	0.000244	-0.5	-0.5	-0.3	-0.3	-0.4	0.11547	D	D	NC	D	3	0	0.2	NC	NC	AT5G47040	Lon protease homolog 1, mitochondrial (LON) identical to Lon protease homolog 1 mitochondrial precursor SP:O64948 from [Arabidopsis thaliana]
248868_at	AT5G46780	12	4		NC	NC	MC_I	971.9	941.2	956.55	P	P	0.000244	0.000244	1294.5	1392.1	1343.3	P	P	0.000244	0.000244	0.3	0.5	0.5	0.5	0.45	0.1	NC	I	I	I	1	0	0.1	NC	NC	AT5G46780	VQ motif-containing protein contains PF05678: VQ motif
248921_at	AT5G45950	9	4	D		NC	MC_D	933.2	951.1	942.15	P	P	0.00415	0.00415	1031.3	947.1	989.2	P	P	0.005859	0.008057	-0.6	-0.4	-1	-0.9	-0.725	0.275379	D	D	D	D	4	-0.1	-0.5	NC	D	AT5G45950	GDSL-motif lipase/hydrolase family protein similar to family II lipase EXL3 (GI:15054386) and EXL1 (GI:15054382) [Arabidopsis thaliana], anther-specific proline-rich protein APG [Arabidopsis thaliana] GI:22599; contains Pfam profile PF00657: Lipase/Acylh
248910_at	AT5G45820	10	4	D		NC	MC_D	1031.3	1040.8	1036.05	P	P	0.000732	0.000732	445.5	653.7	549.6	P	P	0.00415	0.001953	-0.9	-0.9	-0.5	-0.6	-0.725	0.206155	D	D	D	D	4	0.1	0.4	NC	I	AT5G45820	CBL-interacting protein kinase 20 (CIPK20) identical to CBL-interacting protein kinase 20 [Arabidopsis thaliana] gi|14486384|gb|AAK61493
248912_at	AT5G45670	12	4		NC	NC	MC_D	1127.9	1120.8	1124.35	P	P	0.000244	0.000732	964.4	813.2	888.8	P	P	0.000244	0.000732	-0.3	-0.2	-0.5	-0.4	-0.35	0.129099	D	NC	D	D	3	-0.1	-0.1	NC	NC	AT5G45670	GDSL-motif lipase/hydrolase family protein similar to family II lipases EXL3 GI:15054386, EXL1 GI:15054382, EXL2 GI:15054384 from [Arabidopsis thaliana]; contains Pfam profile PF00657: GDSL-like Lipase/Acylhydrolase
248986_at	AT5G45170	12	4		NC	NC	MC_D	3606.9	3474.5	3540.7	P	P	0.000244	0.000244	3116.4	2889.9	3003.15	P	P	0.000244	0.000244	-0.2	-0.2	-0.4	-0.3	-0.275	0.0957427	D	NC	D	D	3	-0.1	-0.2	NC	NC	AT5G45170	CbbY protein-related low similarity to SP|P40119 CbbY protein, chromosomal {Alcaligenes eutrophus}
249061_at	AT5G44550	12	4		NC	NC	MC_D	625.9	568.4	597.15	P	P	0.000244	0.000244	433.9	363.8	398.85	P	P	0.000244	0.000244	-0.6	-0.6	-0.7	-0.5	-0.6	0.0816497	D	NC	D	D	3	0	-0.2	NC	NC	AT5G44550	integral membrane family protein similar to unknown protein (pir||T10581) This family of plant proteins contains a domain that may have a catalytic activity. It has a conserved arginine and aspartate that could form an active site. These proteins are pre
249059_at	AT5G44530	11	4		NC	NC	MC_D	632.1	569.8	600.95	P	P	0.008057	0.008057	370.4	375.6	373	P	P	0.00415	0.01416	-0.5	-0.5	-0.7	-0.6	-0.575	0.0957427	MD	NC	D	D	1	-0.1	-0.1	NC	NC	AT5G44530	subtilase family protein contains Pfam profiles: PF00082 subtilase family
249002_at	AT5G44520	12	4		NC	NC	MC_D	932.2	1208.7	1070.45	P	P	0.000244	0.000244	764.5	897.7	831.1	P	P	0.000244	0.000244	-0.2	-0.3	-0.4	-0.5	-0.35	0.129099	NC	MD	D	D	1	0.1	0	NC	NC	AT5G44520	ribose 5-phosphate isomerase-related low similarity to SP|P47968 Ribose 5-phosphate isomerase (EC 5.3.1.6) (Phosphoriboisomerase) {Mus musculus}
249045_at	AT5G44380	12	4	I		NC	MC_I	2158.4	2008.5	2083.45	P	P	0.000244	0.000244	2848.9	3718	3283.45	P	P	0.000244	0.000244	0.3	0.4	0.6	0.7	0.5	0.182574	I	I	I	I	4	-0.2	0.3	NC	I	AT5G44380	FAD-binding domain-containing protein similar to SP|P30986 reticuline oxidase precursor (Berberine-bridge-forming enzyme) (BBE) (Tetrahydroprotoberberine synthase) [Eschscholzia californica]; contains PF01565 FAD binding domain
249152_s_at	AT5G43370;AT5G43350	12	4		NC	NC	MC_D	1316	1086.1	1201.05	P	P	0.000244	0.000244	809.2	959.5	884.35	P	P	0.000244	0.000732	-0.6	-0.3	-0.5	-0.3	-0.425	0.15	D	D	D	NC	3	-0.2	0.1	NC	NC	AT5G43370;AT5G43350	[AT5G43370, inorganic phosphate transporter (PHT2) identical to inorganic phosphate transporter [Arabidopsis thaliana] GI:2780348];[AT5G43350, inorganic phosphate transporter (PHT1) (PT1) identical to inorganic phosphate transporter [Arabidopsis thalian
249145_at	AT5G43280	12	4		NC	NC	MC_I	444	721.4	582.7	P	P	0.00415	0.00415	753.5	944.2	848.85	P	P	0.001953	0.000732	0.2	0.2	0.8	0.4	0.4	0.282843	I	NC	I	I	3	0.4	0.4	NC	NC	AT5G43280	enoyl-CoA hydratase/isomerase family protein similar to Delta 3,5-delta2,4-dienoyl-CoA isomerase, mitochondrial (ECH1) from Rattus norvegicus [SP|Q62651], from Homo sapiens [SP|Q13011]; contains Pfam profile PF00378 enoyl-CoA hydratase/isomerase family p
249139_at	AT5G43170	12	4		NC	NC	MC_I	532.3	431.3	481.8	P	P	0.00293	0.00415	719.4	712.7	716.05	P	P	0.000732	0.000732	0.5	0.7	0.5	0.6	0.575	0.0957427	I	I	MI	I	3	0	-0.2	NC	NC	AT5G43170	zinc finger (C2H2 type) protein 3 (AZF3) identical to Cys2/His2-type zinc finger protein 3 [Arabidopsis thaliana] gi|6009889|dbj|BAA85109
249233_at	AT5G42150	12	4		NC	NC	MC_I	1236.1	1311.1	1273.6	P	P	0.000244	0.000244	1683.8	1660.7	1672.25	P	P	0.000244	0.000244	0.3	0.4	0.4	0.4	0.375	0.05	I	I	NC	I	3	0	-0.1	NC	NC	AT5G42150	expressed protein
249459_at	AT5G39580	12	4	I		NC	MC_I	289.9	273.1	281.5	P	P	0.00293	0.005859	344.2	874.3	609.25	P	P	0.000244	0.000244	0.7	0.7	1.9	1.8	1.275	0.665207	I	I	I	I	4	0	1.5	NC	I	AT5G39580	peroxidase, putative identical to peroxidase ATP24a [Arabidopsis thaliana] gi|1890313|emb|CAA72484
249477_s_at	AT5G38940;AT5G38930	12	4		NC	NC	MC_I	235.2	161.8	198.5	P	P	0.030273	0.010742	307.8	189.7	248.75	P	P	0.000244	0.000244	0.7	0.9	0.1	0.2	0.475	0.386221	I	I	NC	I	3	-0.3	-0.5	NC	NC	AT5G38940;AT5G38930	[AT5G38940, germin-like protein, putative similar to germin-like portein GLP9 [SP|Q9LEA7]; contains PS00725 Germin family signature];[AT5G38930, germin-like protein, putative similar to germin-like portein GLP9 [SP|Q9LEA7]; contains PS00725 Germin famil
249510_at	AT5G38510	12	4		NC	NC	MC_D	1638.7	1899.3	1769	P	P	0.000244	0.000244	1377.7	1121.9	1249.8	P	P	0.000244	0.000732	-0.2	-0.4	-0.4	-0.4	-0.35	0.1	NC	D	D	D	1	0.1	-0.2	NC	NC	AT5G38510	rhomboid family protein contains Pfam profile PF01694: Rhomboid family
249576_at	AT5G37690	12	4	D	NC		MC_D	1812.2	1392.1	1602.15	P	P	0.000244	0.000244	1030.4	997.8	1014.1	P	P	0.000244	0.000244	-0.8	-0.4	-0.8	-0.4	-0.6	0.23094	D	D	D	D	4	-0.4	0	D	NC	AT5G37690	GDSL-motif lipase/hydrolase family protein similar to family II lipase EXL3 (GI:15054386), EXL1 (GI:15054382), EXL2 (GI:15054384) [Arabidopsis thaliana]
249579_at	AT5G37680	12	4		NC	NC	MC_D	1080	1361.4	1220.7	P	P	0.001221	0.00415	928.4	806.8	867.6	P	P	0.005859	0.005859	-0.1	-0.3	-0.3	-0.5	-0.3	0.163299	NC	D	D	D	1	0.2	-0.2	NC	NC	AT5G37680	ADP-ribosylation factor, putative ADP-ribosylation factor, Leishmania major, EMBL:LMFP1421 and ADP-ribosylation factor-like protein 1 (ARL1) (SP:P40616) Homo sapiens; contains PF00025: ADP-ribosylation factor family
249677_at	AT5G35970	12	4	D	NC		MC_D	5432.8	4181.9	4807.35	P	P	0.000244	0.000244	1953.9	2284	2118.95	P	P	0.000244	0.000244	-1.3	-1	-1.1	-0.9	-1.075	0.170783	D	D	D	D	4	-0.3	0.2	D	NC	AT5G35970	DNA-binding protein, putative similar to SWISS-PROT:Q60560 DNA-binding protein SMUBP-2 (Immunoglobulin MU binding protein 2, SMUBP-2) [Mesocricetus auratus]
249694_at	AT5G35790	12	4		NC	NC	MC_D	2073.8	2499.6	2286.7	P	P	0.000244	0.000244	1669.3	2049.9	1859.6	P	P	0.000244	0.000244	-0.3	-0.5	-0.4	-0.4	-0.4	0.0816497	NC	D	D	D	1	0.1	0	NC	NC	AT5G35790	glucose-6-phosphate 1-dehydrogenase / G6PD (APG1) identical to SP|Q43727 Glucose-6-phosphate 1-dehydrogenase, cytoplasmic isoform (EC 1.1.1.49) (G6PD) {Arabidopsis thaliana}
249727_at	AT5G35490	12	4	I	NC		MC_I	253.7	310.1	281.9	P	P	0.00415	0.00415	524.9	543.8	534.35	P	P	0.000244	0.000244	1.5	0.7	1.4	0.9	1.125	0.386221	I	I	I	I	4	0.6	0.1	I	NC	AT5G35490	expressed protein (MRU1) contains Pfam domain, PF04827: Protein of unknown function (DUF635)
246716_s_at	AT5G28910	6	4		NC	NC	MC_D	188.4	142.8	165.6	P	P	0.008057	0.000244	74.2	72.5	73.35	P	P	0.046143	0.037598	-0.9	-1.2	-0.6	-0.8	-0.875	0.25	NC	D	D	D	1	0.1	-0.3	NC	NC	AT5G28910	expressed protein
246779_at	AT5G27520	12	4		NC	NC	MC_I	490.6	497.7	494.15	P	P	0.01416	0.008057	562.4	663.9	613.15	P	P	0.001221	0.001953	0.4	0.4	0.5	0.4	0.425	0.05	NC	I	MI	I	1	0	0.2	NC	NC	AT5G27520	mitochondrial substrate carrier family protein
246847_at	AT5G26820	12	4		NC	NC	MC_D	1333	1350.4	1341.7	P	P	0.001221	0.00293	1539.8	1149.2	1344.5	P	P	0.008057	0.001221	-0.3	-0.4	-0.5	-0.5	-0.425	0.0957427	D	D	D	MD	3	0	0	NC	NC	AT5G26820	ferroportin-related low similarity to ferroportin1 [Danio rerio] GI:7109245
246831_at	AT5G26340	12	4		NC	NC	MC_I	1390.7	1259	1324.85	P	P	0.000244	0.000244	1510.5	1727	1618.75	P	P	0.000244	0.000244	0.3	0.3	0.4	0.5	0.375	0.0957427	NC	I	I	I	1	0	0.2	NC	NC	AT5G26340	hexose transporter, putative strong similarity to hexose transporter, Lycopersicon esculentum, GI:5734440; contains Pfam profile PF00083: major facilitator superfamily protein
246825_at	AT5G26280;AT5G26260	12	4		NC	NC	MC_I	1767.2	1658.9	1713.05	P	P	0.000732	0.001221	2325.5	2088	2206.75	P	P	0.000244	0.001221	0.2	0.3	0.2	0.4	0.275	0.0957427	MI	I	MI	I	2	-0.1	0.1	NC	NC	AT5G26280;AT5G26260	[AT5G26280, meprin and TRAF homology domain-containing protein / MATH domain-containing protein low similarity to ubiquitin-specific protease 12 [Arabidopsis thaliana] GI:11993471; contains Pfam profile PF00917: MATH domain];[AT5G26260, meprin and TRAF
249742_at	AT5G24490	12	4		NC	NC	MC_D	8934.5	10893.9	9914.2	P	P	0.000244	0.000244	6820.9	8154.7	7487.8	P	P	0.000244	0.000244	-0.4	-0.5	-0.2	-0.3	-0.35	0.129099	D	D	NC	D	3	0.2	0.2	NC	NC	AT5G24490	30S ribosomal protein, putative similar to SP|P19954 Plastid-specific 30S ribosomal protein 1, chloroplast precursor (CS-S5) (CS5) (S22) (Ribosomal protein 1) (PSRP-1) {Spinacia oleracea}; contains Pfam profile PF02482: Sigma 54 modulation protein / S30E
249826_at	AT5G23310	12	4		NC	NC	MC_I	2086.8	2201.9	2144.35	P	P	0.000244	0.000244	2860.5	2830.5	2845.5	P	P	0.000244	0.000244	0.5	0.4	0.3	0.2	0.35	0.129099	I	I	I	NC	3	0.2	-0.2	NC	NC	AT5G23310	superoxide dismutase [Fe] / iron superoxide dismutase 3 (FSD3) identical to iron superoxide dismutase 3 [Arabidopsis thaliana] gi|3273757|gb|AAC24834
249932_at	AT5G22390	11	4		NC	NC	MC_D	407.3	521.6	464.45	P	P	0.001953	0.001221	215.5	275	245.25	P	P	0.018555	0.010742	-0.7	-1	-0.6	-0.7	-0.75	0.173205	MD	D	NC	D	1	0.3	0.1	NC	NC	AT5G22390	expressed protein
246030_at	AT5G21105	12	4	I		NC	MC_I	1775.3	1491.6	1633.45	P	P	0.000732	0.000732	2827.3	3534.3	3180.8	P	P	0.000244	0.000244	0.6	0.7	0.9	1.1	0.825	0.221736	I	I	I	I	4	0	0.3	NC	I	AT5G21105	L-ascorbate oxidase, putative similar to L-ascorbate oxidase from {Nicotiana tabacum} SP|Q40588, {Cucurbita pepo var. melopepo} SP|P37064; contains Pfam profile PF00394: Multicopper oxidase; supported by cDNA gi_15215753_gb_AY050406.1_; A false intron wa
246098_at	AT5G20400	12	4		NC	NC	MC_I	689.5	680.8	685.15	P	P	0.000732	0.001221	826.6	1010.7	918.65	P	P	0.000732	0.001221	0.1	0.3	0.4	0.7	0.375	0.25	NC	I	I	I	1	-0.2	0.3	NC	NC	AT5G20400	oxidoreductase, 2OG-Fe(II) oxygenase family protein similar to naringenin,2-oxoglutarate 3-dioxygenase (flavonone-3-hydroxylase) [SP|Q06942][Malus domestica]; contains PF031712OG-Fe(II) oxygenase superfamily domain
246076_at	AT5G20280	12	4		NC	NC	MC_I	3006.7	3074.6	3040.65	P	P	0.000244	0.000244	3683.4	3833.6	3758.5	P	P	0.000244	0.000244	0.2	0.3	0.3	0.5	0.325	0.125831	NC	I	I	I	1	-0.1	0.1	NC	NC	AT5G20280	sucrose-phosphate synthase, putative similar to sucrose-phosphate synthase (EC 2.4.1.14) isoform 1 - Citrus unshiu, EMBL:AB005023
246099_at	AT5G20230	12	4	I		NC	MC_I	240.5	364.9	302.7	P	P	0.008057	0.001221	485.7	808.7	647.2	P	P	0.000244	0.000244	0.6	0.5	1.7	1.2	1	0.559762	I	I	I	I	4	0.7	0.7	NC	I	AT5G20230	plastocyanin-like domain-containing protein
246154_at	AT5G19940	12	4		NC	NC	MC_D	7219.4	8674.3	7946.85	P	P	0.000244	0.000244	6133.2	7163.6	6648.4	P	P	0.000244	0.000244	-0.3	-0.4	-0.2	-0.3	-0.3	0.0816497	D	D	NC	D	3	0.1	0.2	NC	NC	AT5G19940	plastid-lipid associated protein PAP-related / fibrillin-related weak hit to Pfam profile PF04755: PAP_fibrillin
245947_at	AT5G19530	10	4		NC	NC	MC_D	496.5	443.6	470.05	P	P	0.008057	0.010742	377.9	350.7	364.3	P	P	0.01416	0.030273	-0.5	-0.2	-0.7	-0.6	-0.5	0.216025	D	NC	D	D	3	-0.1	-0.3	NC	NC	AT5G19530	spermine/spermidine synthase family protein similar to SP|P09158 Spermidine synthase (EC 2.5.1.16) (Putrescine aminopropyltransferase) {Escherichia coli}; contains Pfam profile PF01564: Spermine/spermidine synthase
249920_at	AT5G19260	10	4		NC	NC	MC_D	536.4	631.1	583.75	P	P	0.00415	0.005859	520.5	356.5	438.5	P	P	0.005859	0.005859	-0.5	-0.3	-0.8	-0.6	-0.55	0.208167	NC	MD	D	D	1	0.1	-0.3	NC	NC	AT5G19260	expressed protein various predicted proteins
249997_at	AT5G18620	12	4		NC	NC	MC_I	795.1	831.6	813.35	P	P	0.000244	0.000244	1234.5	1073.5	1154	P	P	0.000244	0.000244	0.5	0.7	0.2	0.4	0.45	0.208167	I	I	NC	I	3	-0.1	-0.3	NC	NC	AT5G18620	DNA-dependent ATPase, putative similar to DNA-dependent ATPase SNF2H [Mus musculus] GI:14028669; contains Pfam profiles PF00271: Helicase conserved C-terminal domain, PF00176: SNF2 family N-terminal domain, PF00249: Myb-like DNA-binding domain
249996_at	AT5G18600	12	4	D		NC	MC_D	1886.1	2169.3	2027.7	P	P	0.000244	0.000244	990.9	1512.7	1251.8	P	P	0.000244	0.000244	-0.9	-1.1	-0.4	-0.6	-0.75	0.310913	D	D	D	D	4	0.3	0.4	NC	I	AT5G18600	glutaredoxin family protein contains glutaredoxin domain, INTERPRO:IPR002109
250054_at	AT5G17860	12	4	I		NC	MC_I	1286.4	1618.5	1452.45	P	P	0.000732	0.000244	2091.9	2498.3	2295.1	P	P	0.000244	0.000244	0.6	0.5	1	1	0.775	0.262996	I	I	I	I	4	0	0.3	NC	I	AT5G17860	cation exchanger, putative (CAX7) contains similarity to SWISS-PROT:Q9HC58 NKX3_HUMAN Sodium/potassium/calcium exchanger 3 precursor {Homo sapiens}; Ca2+:Cation Antiporter (CaCA) Family member PMID:11500563
250062_at	AT5G17760	12	4		NC	NC	MC_I	766.9	591.7	679.3	P	P	0.000244	0.000244	809.9	967.9	888.9	P	P	0.000244	0.000244	0.7	0.4	0.8	0.6	0.625	0.170783	I	NC	I	I	3	0.1	0.1	NC	NC	AT5G17760	AAA-type ATPase family protein contains Pfam profile: ATPase family PF00004
246462_at	AT5G16940	12	4		NC	NC	MC_D	445.2	422	433.6	P	P	0.000244	0.000732	196.3	272.7	234.5	P	P	0.000732	0.001221	-1	-0.6	-0.7	-0.5	-0.7	0.216025	D	D	D	NC	3	-0.1	0.2	NC	NC	AT5G16940	expressed protein contains Pfam profile PF04828: Protein of unknown function (DUF636)
250114_s_at	AT5G16340	12	4	I		NC	MC_I	900.8	685.9	793.35	P	P	0.000244	0.001221	1104.1	1396.1	1250.1	P	P	0.000244	0.000244	0.4	0.5	0.9	0.9	0.675	0.262996	I	I	I	I	4	-0.1	0.5	NC	I	AT5G16340	AMP-binding protein, putative similar to AMP-binding protein GI:1903034 from [Brassica napus]; contains Pfam AMP-binding domain PF00501; identical to adenosine monophosphate binding protein 6 AMPBP6 (AMPBP6) GI:20799720
246483_at	AT5G16000	12	4		NC	NC	MC_D	818.1	900.8	859.45	P	P	0.000732	0.000244	649.9	667.6	658.75	P	P	0.000244	0.000244	-0.5	-0.5	-0.6	-0.4	-0.5	0.0816497	D	D	NC	D	3	-0.1	-0.1	NC	NC	AT5G16000	leucine-rich repeat family protein / protein kinase family protein contains Pfam domains PF00560: Leucine Rich Repeat and PF00069: Protein kinase domain
246490_at	AT5G15950	12	4		NC	NC	MC_D	4068.4	3805.4	3936.9	P	P	0.000244	0.000244	2837.3	2911.6	2874.45	P	P	0.000244	0.000244	-0.6	-0.3	-0.5	-0.3	-0.425	0.15	D	D	D	NC	3	-0.2	0.1	NC	NC	AT5G15950	adenosylmethionine decarboxylase family protein contains Pfam profile: PF01536 adenosylmethionine decarboxylase
246550_at	AT5G14920	12	4	I		NC	MC_I	7473.2	7317.9	7395.55	P	P	0.000732	0.000732	9366.2	13646.5	11506.4	P	P	0.000732	0.000732	0.4	0.4	0.8	0.8	0.6	0.23094	I	I	I	I	4	0	0.4	NC	I	AT5G14920	gibberellin-regulated family protein similar to SP|P46689 Gibberellin-regulated protein 1 precursor {Arabidopsis thaliana}; contains Pfam profile PF02704: Gibberellin regulated protein
250142_at	AT5G14650	12	4		NC	NC	MC_D	619.4	544.2	581.8	P	P	0.001953	0.000244	397.1	320.2	358.65	P	P	0.000244	0.000244	-0.6	-0.4	-0.7	-0.6	-0.575	0.125831	MD	D	MD	D	2	-0.1	0	NC	NC	AT5G14650	polygalacturonase, putative / pectinase, putative similar to polygalacturonase PG1 GP|5669846, PG2 GI:5669848 from [Glycine max]; contains PF00295: Glycosyl hydrolases family 28 (polygalacturonases)
245855_at	AT5G13550	12	4		NC	NC	MC_I	937	916.3	926.65	P	P	0.000732	0.000732	1215.2	1179.1	1197.15	P	P	0.000732	0.000244	0.5	0.5	0.2	0.3	0.375	0.15	I	I	NC	MI	2	0	-0.3	NC	NC	AT5G13550	sulfate transporter family protein similar to sulfate transporter [Arabidopsis thaliana] GI:3777483; contains Pfam profiles PF00916: Sulfate transporter family, PF01740: STAS domain
245854_at	AT5G13490	12	4		NC	NC	MC_I	3828.2	3907.1	3867.65	P	P	0.000732	0.000732	5518.9	5050.9	5284.9	P	P	0.000732	0.000732	0.3	0.5	0.4	0.5	0.425	0.0957427	I	I	NC	I	3	0	0.1	NC	NC	AT5G13490	ADP, ATP carrier protein 2, mitochondrial / ADP/ATP translocase 2 / adenine nucleotide translocator 2 (ANT2) identical to SWISS-PROT:P40941 ADP,ATP carrier protein 2, mitochondrial precursor (Adenine nucleotide translocator 2) [Arabidopsis thaliana]
250293_s_at	AT5G13360	12	4		NC	NC	MC_I	654.5	842.2	748.35	P	P	0.001221	0.000244	1205.8	1045.4	1125.6	P	P	0.000244	0.000732	0.8	0.6	0.4	0.2	0.5	0.258199	I	I	I	NC	3	0.2	-0.3	NC	NC	AT5G13360	auxin-responsive GH3 family protein similar to auxin-responsive GH3 product [Glycine max] GI:18591; contains Pfam profile PF03321: GH3 auxin-responsive promoter
250287_at	AT5G13330	12	4		NC	NC	MC_I	349	406.2	377.6	P	P	0.001953	0.00415	462.8	521.9	492.35	P	P	0.001221	0.000732	0.6	0.3	0.7	0.6	0.55	0.173205	I	MI	I	I	3	0.1	0.2	NC	NC	AT5G13330	AP2 domain-containing transcription factor family protein similar to AP2 domain containing protein RAP2.6, Arabidopsis thaliana, EMBL:AF003099; contains Pfam profile PF00847: AP2 domain
245977_at	AT5G13110	12	4		NC	NC	MC_D	3414.2	3000.4	3207.3	P	P	0.000244	0.000244	2732.7	2386.8	2559.75	P	P	0.000244	0.000244	-0.3	-0.1	-0.5	-0.3	-0.3	0.163299	D	NC	D	D	3	-0.2	-0.2	NC	NC	AT5G13110	glucose-6-phosphate 1-dehydrogenase, putative / G6PD, putative similar to SP|Q43839 Glucose-6-phosphate 1-dehydrogenase, chloroplast precursor (EC 1.1.1.49) (G6PD) {Solanum tuberosum}; contains Pfam profiles PF02781: Glucose-6-phosphate dehydrogenase C-t
250275_at	AT5G13030	12	4		NC	NC	MC_I	1657.5	1727.1	1692.3	P	P	0.000244	0.000244	2125.7	2003.4	2064.55	P	P	0.000244	0.000244	0.4	0.3	0.4	0.3	0.35	0.057735	I	NC	I	I	3	0	0	NC	NC	AT5G13030	expressed protein contains Pfam profile PF02696: Uncharacterized ACR, YdiU/UPF0061 family
250327_at	AT5G12050	12	4		NC	NC	MC_D	430.5	452.1	441.3	P	P	0.000244	0.000732	271.4	358.6	315	P	P	0.001221	0.001953	-0.5	-0.7	-0.3	-0.4	-0.475	0.170783	D	D	NC	D	3	0.2	0.2	NC	NC	AT5G12050	expressed protein
250434_at	AT5G10390	12	4		NC	NC	MC_I	1753.8	2145.9	1949.85	P	P	0.000244	0.000244	2637	2255.7	2446.35	P	P	0.000244	0.000244	0.4	0.3	0.4	0.2	0.325	0.0957427	I	I	I	NC	3	0.1	-0.2	NC	NC	AT5G10390	histone H3 identical to histone H3 from Zea mays SP|P05203, Medicago sativa GI:166384, Encephalartos altensteinii SP|P08903, Pisum sativum SP|P02300; contains Pfam profile PF00125 Core histone H2A/H2B/H3/H4
250471_at	AT5G10170	12	4		NC	NC	MC_D	416.8	532.5	474.65	P	P	0.000732	0.001953	363.3	338.1	350.7	P	P	0.001221	0.008057	-0.4	-0.5	-0.4	-0.8	-0.525	0.189297	MD	NC	D	D	1	0.3	-0.1	NC	NC	AT5G10170	inositol-3-phosphate synthase, putative / myo-inositol-1-phosphate synthase, putative / MI-1-P synthase, putative very strong similarity to SP|Q38862 Myo-inositol-1-phosphate synthase isozyme 2 (EC 5.5.1.4) (MI-1-P synthase 2) (IPS 2) {Arabidopsis thalia
250490_at	AT5G09760	12	4		NC	NC	MC_D	2085.7	2025.4	2055.55	P	P	0.000244	0.000244	1701.3	1611.4	1656.35	P	P	0.000244	0.000244	-0.3	-0.3	-0.3	-0.4	-0.325	0.05	NC	D	D	D	1	0.1	0	NC	NC	AT5G09760	pectinesterase family protein contains Pfam profile: PF01095 pectinesterase
250515_at	AT5G09570	12	4		NC	NC	MC_I	405.5	393.3	399.4	P	P	0.01416	0.008057	838.5	1023.4	930.95	P	P	0.005859	0.00415	1	0.9	1.2	1.2	1.075	0.15	I	NC	I	I	3	0.2	0.3	NC	NC	AT5G09570	expressed protein contains Pfam domain, PF04933: Protein of unknown function (DUF657)
250500_at	AT5G09530	12	4	D	NC		MC_D	3386	2470.5	2928.25	P	P	0.000244	0.000244	1586.5	1777.1	1681.8	P	P	0.000244	0.000244	-1	-0.6	-0.9	-0.5	-0.75	0.238048	D	D	D	D	4	-0.5	0.1	D	NC	AT5G09530	hydroxyproline-rich glycoprotein family protein contains proline-rich extensin domains, INTERPRO:IPR002965
250633_at	AT5G07460	12	4		NC	NC	MC_I	2208.1	2323	2265.55	P	P	0.001221	0.001221	2831.8	2623.1	2727.45	P	P	0.000732	0.001221	0.3	0.3	0.2	0.2	0.25	0.057735	I	I	I	NC	3	0	-0.1	NC	NC	AT5G07460	peptide methionine sulfoxide reductase, putative similar to peptide methionine sulfoxide reductase (msr) [Arabidopsis thaliana] GI:4884033; contains Pfam profile PF01625: Peptide methionine sulfoxide reductase
250669_at	AT5G06870	12	4	I		NC	MC_I	638.5	837.7	738.1	P	P	0.000244	0.000244	1035.5	1807.3	1421.4	P	P	0.000244	0.000244	0.9	0.6	1.7	1.2	1.1	0.469042	I	I	I	I	4	0.3	0.7	NC	I	AT5G06870	polygalacturonase inhibiting protein 2 (PGIP2) identical to polygalacturonase inhibiting protein 2 (PGIP2) [Arabidopsis thaliana] gi|7800201|gb|AAF69828; contains leucine rich-repeat (LRR) domains Pfam:PF00560, INTERPRO:IPR001611
250763_at	AT5G06060	12	4		NC	NC	MC_D	2103	2285.3	2194.15	P	P	0.000732	0.000732	1564.9	1474	1519.45	P	P	0.000732	0.001953	-0.4	-0.5	-0.5	-0.5	-0.475	0.05	NC	D	D	D	1	0.1	0	NC	NC	AT5G06060	tropinone reductase, putative / tropine dehydrogenase, putative similar to tropinone reductase SP:P50165 from [Datura stramonium]
250738_at	AT5G05730	12	4		NC	NC	MC_I	3222	3685.8	3453.9	P	P	0.00415	0.00415	4411.2	4022.1	4216.65	P	P	0.000732	0.00293	0.4	0.4	0.3	0.1	0.3	0.141421	I	I	I	NC	3	0.1	-0.2	NC	NC	AT5G05730	anthranilate synthase, alpha subunit, component I-1 (ASA1) identical to SP|P32068
250832_at	AT5G04950	12	4		NC	NC	MC_D	11633.9	10187.8	10910.9	P	P	0.000244	0.000244	9040.7	8628	8834.35	P	P	0.000244	0.000244	-0.3	-0.1	-0.5	-0.3	-0.3	0.163299	D	NC	D	D	3	-0.2	-0.2	NC	NC	AT5G04950	nicotianamine synthase, putative similar to nicotianamine synthase [Lycopersicon esculentum][GI:4753801], nicotianamine synthase 2 [Hordeum vulgare][GI:4894912]
245711_at	AT5G04340	12	4		NC	NC	MC_I	404.2	498.4	451.3	P	P	0.005859	0.005859	525.5	731.4	628.45	P	P	0.001221	0.000732	0.5	0.3	0.6	0.6	0.5	0.141421	I	NC	I	I	3	0.1	0.1	NC	NC	AT5G04340	zinc finger (C2H2 type) family protein contains Pfam domain, PF00096: Zinc finger, C2H2 type
250867_at	AT5G03880	12	4		NC	NC	MC_D	7627.6	7389.5	7508.55	P	P	0.000244	0.000244	6013	6262.5	6137.75	P	P	0.000244	0.000244	-0.3	-0.3	-0.3	-0.2	-0.275	0.05	D	D	MD	MD	2	0	0	NC	NC	AT5G03880	expressed protein
250898_at	AT5G03300	12	4		NC	NC	MC_D	5959.2	6323.3	6141.25	P	P	0.000244	0.000244	4866.9	5091.2	4979.05	P	P	0.000244	0.000244	-0.3	-0.3	-0.3	-0.4	-0.325	0.05	D	D	NC	D	3	0	0	NC	NC	AT5G03300	adenosine kinase 2 (ADK2) contains Pfam profile: PF00294 pfkB family carbohydrate kinase; identical to cDNA adenosine kinase 2 (ADK2) GI:12017763
251005_at	AT5G02590	12	4		NC	NC	MC_I	541	566.6	553.8	P	P	0.000244	0.000244	729.9	805.3	767.6	P	P	0.000244	0.000244	0.3	0.4	0.5	0.6	0.45	0.129099	MI	NC	I	I	1	0.1	0.1	NC	NC	AT5G02590	chloroplast lumen common family protein various predicted proteins, Arabidopsis thaliana
251058_at	AT5G01790	12	4		NC	NC	MC_D	868.7	700.5	784.6	P	P	0.000732	0.000732	789.8	522.1	655.95	P	P	0.001953	0.00415	-0.4	-0.2	-0.7	-0.5	-0.45	0.208167	MD	NC	D	D	1	-0.2	-0.2	NC	NC	AT5G01790	expressed protein
251144_at	AT5G01210	12	4	I		NC	MC_I	1310	1406.6	1358.3	P	P	0.000244	0.000244	1846.1	2618.8	2232.45	P	P	0.000244	0.000244	0.4	0.4	1	1	0.7	0.34641	I	I	I	I	4	0	0.5	NC	I	AT5G01210	transferase family protein contains Pfam profile PF02458 transferase family
252943_at	AT4G39330	12	4		NC	NC	MC_D	7847.2	7161.7	7504.45	P	P	0.000244	0.000244	5665.8	6218.3	5942.05	P	P	0.000732	0.000244	-0.3	-0.2	-0.5	-0.3	-0.325	0.125831	D	NC	D	D	3	-0.1	-0.1	NC	NC	AT4G39330	mannitol dehydrogenase, putative nearly identical to SP|P42734, probable mannitol dehydrogenase
252885_at	AT4G39260	12	4		NC	NC	MC_I	8213	7219.4	7716.2	P	P	0.000244	0.000244	9760.2	9529.4	9644.8	P	P	0.000244	0.000244	0.2	0.3	0.4	0.4	0.325	0.0957427	I	I	NC	I	3	-0.1	0	NC	NC	AT4G39260	glycine-rich RNA-binding protein 8 (GRP8) (CCR1) SP|Q03251 Glycine-rich RNA-binding protein 8 (CCR1 protein) (GRP8) {Arabidopsis thaliana} isoform contains a non-consensus CG acceptor splice site at intron 2
252971_at	AT4G38770	12	4		NC	NC	MC_D	23892.5	23383.9	23638.2	P	P	0.000244	0.000244	19358.4	19421.2	19389.8	P	P	0.000244	0.000244	-0.3	-0.3	-0.4	-0.4	-0.35	0.057735	D	D	D	MD	3	0	0	NC	NC	AT4G38770	proline-rich family protein (PRP4) similar to proline-rich protein [Arabidopsis thaliana] gi|6782442|gb|AAF28388; contains proline-rich extensin domains, INTERPRO:IPR002965
252993_at	AT4G38540	12	4		NC	NC	MC_I	1967	2132.9	2049.95	P	P	0.000244	0.000244	2540.9	2789.2	2665.05	P	P	0.000244	0.000244	0.3	0.2	0.4	0.4	0.325	0.0957427	I	NC	I	I	3	0	0.2	NC	NC	AT4G38540	monooxygenase, putative (MO2) identical to GI:3426064
252983_at	AT4G37980	12	4		NC	NC	MC_D	2404.1	2160.1	2282.1	P	P	0.000244	0.000244	1676.6	1740.6	1708.6	P	P	0.000244	0.000244	-0.5	-0.4	-0.4	-0.4	-0.425	0.05	D	NC	D	D	3	-0.1	-0.1	NC	NC	AT4G37980	mannitol dehydrogenase, putative (ELI3-1) identical to GI:16267
246197_at	AT4G37010	12	4		NC	NC	MC_D	287.5	255	271.25	P	P	0.001221	0.00293	92.8	183.5	138.15	P	P	0.01416	0.005859	-1	-0.9	-0.7	-0.3	-0.725	0.30957	D	D	D	NC	3	-0.1	0.1	NC	NC	AT4G37010	caltractin, putative / centrin, putative similar to Caltractin (Centrin) SP:P41210 from [Atriplex nummularia]
246238_at	AT4G36670	12	4		NC	NC	MC_I	1672.7	1265.3	1469	P	P	0.000244	0.000244	2238.5	2281.5	2260	P	P	0.000244	0.000244	0.3	0.4	0.6	0.7	0.5	0.182574	I	NC	I	I	3	-0.1	0.3	NC	NC	AT4G36670	mannitol transporter, putative similar to mannitol transporter [Apium graveolens var. dulce] GI:12004316; contains Pfam profile PF00083: major facilitator superfamily protein
246203_at	AT4G36610	12	4		NC	NC	MC_D	1070.2	963	1016.6	P	P	0.001953	0.000244	776.3	723.3	749.8	P	P	0.00293	0.00415	-0.4	-0.2	-0.5	-0.3	-0.35	0.129099	D	NC	D	D	3	-0.1	-0.1	NC	NC	AT4G36610	hydrolase, alpha/beta fold family protein low similarity to 2-hydroxy-6-oxo-7-methylocta-2,4-dienoate hydrolase [Pseudomonas fluorescens] GI:1871461; contains Pfam profile PF00561: hydrolase, alpha/beta fold family
253175_at	AT4G35050	12	4		NC	NC	MC_I	404.7	340.7	372.7	P	P	0.001953	0.001953	676.5	567.2	621.85	P	P	0.000244	0.000244	0.8	0.8	0.5	0.8	0.725	0.15	I	I	NC	I	3	-0.1	0.1	NC	NC	AT4G35050	WD-40 repeat protein (MSI3) contains 5 WD-40 repeats (PF0400); identical to WD-40 repeat protein MSI3 (SP:O22469) [Arabidopsis thaliana]
253247_at	AT4G34610	12	4		NC	NC	MC_D	780.1	672.2	726.15	P	P	0.000732	0.000244	552.6	434.5	493.55	P	P	0.001953	0.000244	-0.8	-0.4	-0.8	-0.4	-0.6	0.23094	D	NC	D	MD	2	-0.3	-0.2	NC	NC	AT4G34610	homeodomain-containing protein similaritry to homeotic protein BEL1, Arabidopsis thaliana, PIR2:A57632
253285_at	AT4G34250	12	4		NC	NC	MC_D	456.4	437.5	446.95	P	P	0.000732	0.000244	331.5	250.1	290.8	P	P	0.00415	0.000244	-0.8	-0.7	-0.7	-0.8	-0.75	0.057735	D	D	NC	D	3	-0.1	0	NC	NC	AT4G34250	fatty acid elongase, putative similar to fatty acid elongase 1 (Fae1), Arabidopsis thaliana, U29142 [GI:881615]
253301_at	AT4G33720	12	4	I		NC	MC_I	8414.8	9760.3	9087.55	P	P	0.000244	0.000244	13324.8	18293	15808.9	P	P	0.000244	0.000244	0.7	0.5	1	0.9	0.775	0.221736	I	I	I	I	4	0.2	0.5	NC	I	AT4G33720	pathogenesis-related protein, putative similar to SP|P33154 Pathogenesis-related protein 1 precursor (PR-1) {Arabidopsis thaliana}; contains Pfam profile PF00188: SCP-like extracellular protein
253305_at	AT4G33666;AT4G33670	12	4	D		NC	MC_D	2742.2	2574.6	2658.4	P	P	0.001953	0.001221	859.5	1478.3	1168.9	P	P	0.00415	0.001221	-1.5	-1.4	-0.8	-0.7	-1.1	0.408248	D	D	D	D	4	-0.1	0.8	NC	I	AT4G33666;AT4G33670	[AT4G33666, expressed protein];[AT4G33670, L-galactose dehydrogenase (L-GalDH) identical to L-galactose dehydrogenase [Arabidopsis thaliana] GI:16555790; similar to L-fucose dehydrogenase [Pseudomonas sp.] GI:829054; contains Pfam profile PF00248: oxido
253414_at	AT4G33050	12	4	I	NC		MC_I	952	1195	1073.5	P	P	0.000244	0.000244	2172.1	1949.5	2060.8	P	P	0.000244	0.000244	0.9	0.6	0.8	0.6	0.725	0.15	I	I	I	I	4	0.4	0	I	NC	AT4G33050	calmodulin-binding family protein contains Pfam profile PF00612: IQ calmodulin-binding motif
253394_at	AT4G32770	12	4		NC	NC	MC_D	793.7	924.9	859.3	P	P	0.00293	0.001953	691.7	651	671.35	P	P	0.001953	0.00293	-0.5	-0.6	-0.5	-0.7	-0.575	0.0957427	NC	D	D	D	1	0.2	-0.1	NC	NC	AT4G32770	tocopherol cyclase, chloroplast / vitamin E deficient 1 (VTE1) / sucrose export defective 1 (SXD1) identical to SP|Q94FY7 Tocopherol cyclase, chloroplast precursor (Vitamin E deficient 1) (Sucrose export defective 1) {Arabidopsis thaliana}
253515_at	AT4G31320	11	4		NC	NC	MC_D	337.2	364.9	351.05	P	P	0.018555	0.01416	399.3	306.6	352.95	P	P	0.037598	0.030273	-0.3	-0.3	-0.4	-0.3	-0.325	0.05	NC	D	D	D	1	0.1	-0.3	NC	NC	AT4G31320	auxin-responsive protein, putative / small auxin up RNA (SAUR_C) similar to auxin-induced protein TGSAUR22 (GI:10185820) [Tulipa gesnerian]; similar to auxin-induced protein 15A (SP:P33081) from [Glycine max]
253519_at	AT4G31240	12	4		NC	NC	MC_I	247.6	303.8	275.7	P	P	0.037598	0.046143	426.7	338.3	382.5	P	P	0.018555	0.018555	0.8	0.5	0.5	0.7	0.625	0.15	I	I	NC	I	3	0.2	-0.1	NC	NC	AT4G31240	expressed protein
253548_at	AT4G30993	12	4		NC	NC	MC_D	839	849.4	844.2	P	P	0.001221	0.000244	620.7	461.8	541.25	P	P	0.001953	0.000244	-0.2	-0.4	-0.7	-0.7	-0.5	0.244949	MD	D	D	D	1	0	-0.4	NC	NC	AT4G30993	expressed protein
253547_at	AT4G30950	12	4		NC	NC	MC_D	17279.8	17175.8	17227.8	P	P	0.000244	0.000244	14353.3	13456.2	13904.8	P	P	0.000244	0.000244	-0.2	-0.3	-0.3	-0.3	-0.275	0.05	D	D	NC	D	3	0.1	0	NC	NC	AT4G30950	omega-6 fatty acid desaturase, chloroplast (FAD6) (FADC) identical to GI:493068
253666_at	AT4G30270	12	4	I		NC	MC_I	8309.1	7620.1	7964.6	P	P	0.000244	0.000244	9832.2	16053.7	12943	P	P	0.000244	0.000244	0.2	0.4	0.9	1	0.625	0.386221	I	I	I	I	4	-0.2	0.7	NC	I	AT4G30270	MERI-5 protein (MERI-5) (MERI5B) / endo-xyloglucan transferase / xyloglucan endo-1,4-beta-D-glucanase (SEN4) identical to endo-xyloglucan transferase gi:944810, SP|P24806 MERI-5 protein precursor (Endo-xyloglucan transferase) (Xyloglucan endo-1,4-beta-D-
253660_at	AT4G30140	12	4	D		NC	MC_D	1550.1	1645.4	1597.75	P	P	0.000244	0.000244	1167.7	829.9	998.8	P	P	0.000732	0.001221	-0.7	-0.8	-1.3	-1.2	-1	0.294392	D	D	D	D	4	0	-0.4	NC	MD	AT4G30140	GDSL-motif lipase/hydrolase family protein low similarity to family II lipases EXL3 GI:15054386, EXL1 GI:15054382 from [Arabidopsis thaliana]; contains Pfam profile PF00657: GDSL-like Lipase/Acylhydrolase
253915_at	AT4G27280	12	4	I		NC	MC_I	628.6	870.2	749.4	P	P	0.000244	0.000244	1593.4	2193.6	1893.5	P	P	0.000244	0.000244	1.2	0.9	1.7	1.2	1.25	0.331662	I	I	I	I	4	0.2	0.4	NC	I	AT4G27280	calcium-binding EF hand family protein similar to EF-hand Ca2+-binding protein CCD1 [Triticum aestivum] GI:9255753; contains INTERPRO:IPR002048 calcium-binding EF-hand domain
253972_at	AT4G26500	12	4		NC	NC	MC_I	1828.1	1731.4	1779.75	P	P	0.000244	0.000244	2219.3	2122.6	2170.95	P	P	0.000244	0.000244	0.3	0.3	0.3	0.3	0.3	0	MI	I	NC	I	1	0	0	NC	NC	AT4G26500	BolA-like family protein / Fe-S metabolism associated domain-containing protein similar to SufE protein [Erwinia chrysanthemi] GI:11342550; contains Pfam profiles PF02657: Fe-S metabolism associated domain, PF01722: BolA-like protein
253986_at	AT4G26210	12	4		NC	NC	MC_I	2191.8	2529.1	2360.45	P	P	0.000244	0.000244	3016.6	2875.5	2946.05	P	P	0.000244	0.000244	0.3	0.2	0.4	0.3	0.3	0.0816497	NC	I	I	I	1	0.1	0.1	NC	NC	AT4G26210	mitochondrial ATP synthase g subunit family protein contains Pfam profile: PF04718 mitochondrial ATP synthase g subunit
254110_at	AT4G25260	12	4		NC	NC	MC_I	748	728.8	738.4	P	P	0.000732	0.000244	991.2	993.3	992.25	P	P	0.000244	0.000244	0.2	0.4	0.4	0.5	0.375	0.125831	NC	I	I	I	1	-0.2	0.3	NC	NC	AT4G25260	invertase/pectin methylesterase inhibitor family protein low similarity to pectinesterase from Phaseolus vulgaris SP|Q43111, Lycopersicon esculentum SP|Q43143, Arabidopsis thaliana SP|Q42534; contains Pfam profile PF04043: Plant invertase/pectin methyles
254137_at	AT4G24930	12	4		NC	NC	MC_D	1974	2266.8	2120.4	P	P	0.000244	0.000244	1905	1740.6	1822.8	P	P	0.000244	0.000244	-0.3	-0.3	-0.4	-0.4	-0.35	0.057735	D	D	NC	D	3	0	-0.1	NC	NC	AT4G24930	thylakoid lumenal 17.9 kDa protein, chloroplast SP:Q9SW33;GI:17369630;PMID:11719511; similar to expressed protein gi:12321169 {Oryza sativa}
254145_at	AT4G24700	12	4		NC	NC	MC_D	1153.2	1338.1	1245.65	P	P	0.000244	0.00415	762.3	878.3	820.3	P	P	0.001953	0.001221	-0.9	-0.6	-0.8	-0.6	-0.725	0.15	D	D	D	MD	3	-0.2	0	NC	NC	AT4G24700	expressed protein
254125_at	AT4G24670	12	4		NC	NC	MC_D	611.5	597.3	604.4	P	P	0.000244	0.001221	341.3	345.1	343.2	P	P	0.001221	0.000732	-0.6	-0.4	-0.7	-0.7	-0.6	0.141421	D	NC	D	MD	2	-0.5	-0.1	NC	NC	AT4G24670	alliinase family protein contains Pfam profiles: PF04864 allinase C-terminal domain, PF04863 alliinase EGF-like domain
254141_at	AT4G24620	12	4		NC	NC	MC_D	5452.7	4925.5	5189.1	P	P	0.000244	0.000244	4390.2	3974.4	4182.3	P	P	0.000244	0.000244	-0.4	-0.2	-0.5	-0.4	-0.375	0.125831	D	NC	D	D	3	-0.1	-0.1	NC	NC	AT4G24620	glucose-6-phosphate isomerase, putative similar to glucose-6-phosphate isomerase [Spinacia oleracea] GI:3413511; contains Pfam profile PF00342: glucose-6-phosphate isomerase
254232_at	AT4G23600	12	4	I	NC		MC_I	4186.4	5083.2	4634.8	P	P	0.000244	0.000244	14089.8	13805.7	13947.8	P	P	0.000244	0.000244	1.8	1.5	1.7	1.4	1.6	0.182574	I	I	I	I	4	0.4	0	I	NC	AT4G23600	coronatine-responsive tyrosine aminotransferase / tyrosine transaminase similar to nicotianamine aminotransferase from Hordeum vulgare [GI:6498122, GI:6469087]; contains Pfam profile PF00155 aminotransferase, classes I and II; identical to cDNA coronatin
254247_at	AT4G23260	12	4		NC	NC	MC_I	351.2	405.7	378.45	P	P	0.000732	0.001221	534.5	597.8	566.15	P	P	0.000244	0.000244	0.6	0.6	0.6	0.7	0.625	0.05	NC	MI	I	I	1	-0.1	0.3	NC	NC	AT4G23260	protein kinase family protein contains Pfam domain PF00069: Protein kinase domain
254241_at	AT4G23190	12	4		NC	NC	MC_I	162.8	97.4	130.1	P	P	0.001953	0.005859	258	210.3	234.15	P	P	0.000244	0.000244	0.7	0.9	0.7	1	0.825	0.15	I	I	NC	I	3	-0.8	0	NC	NC	AT4G23190	protein kinase family protein contains Pfam PF00069: Protein kinase domain
254327_at	AT4G22490	12	4	D		NC	MC_D	2539.7	2123.1	2331.4	P	P	0.000244	0.000244	1572.5	1163.8	1368.15	P	P	0.000244	0.000244	-0.4	-0.4	-0.9	-0.9	-0.65	0.288675	D	D	D	D	4	0	-0.4	NC	D	AT4G22490	protease inhibitor/seed storage/lipid transfer protein (LTP) family protein contains Pfam protease inhibitor/seed storage/LTP family domain PF00234
254387_at	AT4G21850	12	4	I		NC	MC_I	1829.5	1773.3	1801.4	P	P	0.000244	0.000244	3291.8	3968.7	3630.25	P	P	0.000244	0.000244	0.7	0.8	0.9	1	0.85	0.129099	I	I	I	I	4	-0.1	0.2	NC	I	AT4G21850	methionine sulfoxide reductase domain-containing protein / SeIR domain-containing protein low similarity to pilin-like transcription factor [Homo sapiens] GI:5059062, SP|P14930 Peptide methionine sulfoxide reductase msrA/msrB (EC 1.8.4.6) {Neisseria gono
254396_at	AT4G21680	12	4	I		NC	MC_I	316.6	296.6	306.6	P	P	0.001953	0.008057	671.9	1223.9	947.9	P	P	0.000244	0.000244	0.9	1.1	1.4	1.6	1.25	0.310913	I	I	I	I	4	-0.5	0.6	NC	I	AT4G21680	proton-dependent oligopeptide transport (POT) family protein contains Pfam profile: PF00854 POT family
254398_at	AT4G21280	12	4		NC	NC	MC_D	30269.2	31633.5	30951.3	P	P	0.000244	0.000244	26807.2	25391.3	26099.2	P	P	0.000244	0.000244	-0.2	-0.3	-0.3	-0.4	-0.3	0.0816497	MD	D	D	D	1	0.1	-0.1	NC	NC	AT4G21280	oxygen-evolving enhancer protein 3, chloroplast, putative (PSBQ1) (PSBQ) identical to SP|Q9XFT3 Oxygen-evolving enhancer protein 3-1, chloroplast precursor (OEE3) (16 kDa subunit of oxygen evolving system of photosystem II) (OEC 16 kDa subunit) {Arabidop
254460_at	AT4G21210	12	4		NC	NC	MC_D	6145.8	6088.7	6117.25	P	P	0.000244	0.000244	5404	4764.8	5084.4	P	P	0.000244	0.000244	-0.2	-0.2	-0.3	-0.3	-0.25	0.057735	D	MD	D	D	3	0	-0.1	NC	NC	AT4G21210	expressed protein contains Pfam domain PF03618: Domain of unknown function (DUF299)
254468_at	AT4G20460	12	4		NC	NC	MC_D	496.1	427.3	461.7	P	P	0.000244	0.000244	393.9	356	374.95	P	P	0.000732	0.000244	-0.5	-0.4	-0.5	-0.4	-0.45	0.057735	D	MD	D	NC	2	-0.2	0	NC	NC	AT4G20460	NAD-dependent epimerase/dehydratase family protein similar to UDP-galactose 4-epimerase from Cyamopsis tetragonoloba GI:3021357 [EMBL:AJ005082], Bacillus subtilis SP|P55180; contains Pfam profile PF01370 NAD dependent epimerase/dehydratase family
254474_at	AT4G20390	12	4		NC	NC	MC_D	1154.3	1196.4	1175.35	P	P	0.001953	0.000732	830.6	812.6	821.6	P	P	0.001953	0.00293	-0.7	-0.4	-0.9	-0.6	-0.65	0.208167	D	NC	D	D	3	-0.4	-0.2	NC	NC	AT4G20390	integral membrane family protein contains TIGRFAM TIGR01569 : plant integral membrane protein TIGR01569; contains Pfam PF04535 : Domain of unknown function (DUF588)
254573_at	AT4G19420	12	4	I		NC	MC_I	1178.2	1278.2	1228.2	P	P	0.000244	0.000244	2358.3	2824.4	2591.35	P	P	0.000244	0.000244	0.8	0.9	1.2	1.3	1.05	0.238048	I	I	I	I	4	-0.1	0.3	NC	MI	AT4G19420	pectinacetylesterase family protein contains Pfam profile: PF03283 pectinacetylesterase
254564_at	AT4G19170	12	4	D		NC	MC_D	1926.7	1770.9	1848.8	P	P	0.000244	0.000732	765.3	1061	913.15	P	P	0.00293	0.005859	-0.9	-0.9	-0.5	-0.6	-0.725	0.206155	D	D	D	D	4	0	0.5	NC	I	AT4G19170	9-cis-epoxycarotenoid dioxygenase, putative / neoxanthin cleavage enzyme, putative / carotenoid cleavage dioxygenase, putative similar to 9-cis-epoxycarotenoid dioxygenase [Phaseolus vulgaris][GI:6715257]; neoxanthin cleavage enzyme, Lycopersicon esculen
245247_at	AT4G17230	12	4		NC	NC	MC_I	570.7	634.5	602.6	P	P	0.030273	0.005859	763.9	850.9	807.4	P	P	0.001953	0.001953	0.5	0.2	0.5	0.2	0.35	0.173205	I	NC	I	I	3	0.3	0.1	NC	NC	AT4G17230	scarecrow-like transcription factor 13 (SCL13)
245266_at	AT4G17070	12	4		NC	NC	MC_I	859.9	643.1	751.5	P	P	0.000244	0.000244	920.1	1148.7	1034.4	P	P	0.000244	0.000244	0.4	0.2	0.9	0.6	0.525	0.298608	I	NC	I	I	3	0.2	0.2	NC	NC	AT4G17070	expressed protein
245439_at	AT4G16670	12	4		NC	NC	MC_I	269.5	410.7	340.1	P	P	0.037598	0.023926	387.4	549.7	468.55	P	P	0.000732	0.001953	0.4	0.5	0.5	0.5	0.475	0.05	I	MI	I	I	3	0.5	0.2	NC	NC	AT4G16670	expressed protein
245360_at	AT4G16330	12	4		NC	NC	MC_I	1602.5	2107.2	1854.85	P	P	0.000732	0.000732	2308.6	2460.8	2384.7	P	P	0.000244	0.000244	0.3	0.2	0.5	0.4	0.35	0.129099	I	NC	I	I	3	0.1	0.1	NC	NC	AT4G16330	oxidoreductase, 2OG-Fe(II) oxygenase family protein similar to flavonone-3-hydroxylase (naringenin,2-oxoglutarate 3-dioxygenase) from Malus domestica [SP|Q06942], Pyrus communis [GI:20269881]; contains Pfam domain PF03171, 2OG-Fe(II) oxygenase superfamil
245393_at	AT4G16260	12	4		NC	NC	MC_I	12424.1	13457.2	12940.6	P	P	0.000732	0.000732	14399.6	16575.5	15487.5	P	P	0.000244	0.000732	0.2	0.2	0.5	0.4	0.325	0.15	I	NC	I	I	3	0.1	0.3	NC	NC	AT4G16260	glycosyl hydrolase family 17 protein similar to glucan endo-1,3-beta-glucosidase, basic vacuolar isoform precursor SP:P52407 from [Hevea brasiliensis]
245281_at	AT4G15560	12	4		NC	NC	MC_D	12698.4	12415.8	12557.1	P	P	0.000244	0.000244	10480.1	9072.9	9776.5	P	P	0.000244	0.000244	-0.3	-0.2	-0.4	-0.4	-0.325	0.0957427	D	MD	D	D	3	0	-0.2	NC	NC	AT4G15560	1-deoxy-D-xylulose 5-phosphate synthase, putative / 1-deoxyxylulose-5-phosphate synthase, putative / DXP-synthase, putative (DEF) (CLA1) identical to SP|Q38854 Probable 1-deoxy-D-xylulose 5-phosphate synthase, chloroplast precursor (EC 4.1.3.37) (1-deoxy
245593_at	AT4G14550	12	4		NC	NC	MC_D	345	447.9	396.45	P	P	0.000244	0.001953	436	239.3	337.65	P	P	0.00293	0.00293	-0.4	-0.6	-0.7	-0.8	-0.625	0.170783	NC	D	D	D	1	0	0.2	NC	NC	AT4G14550	auxin-responsive AUX/IAA family protein identical to IAA14 (GI:972931) [Arabidopsis thaliana]; similar to SP|Q38825 Auxin-responsive protein IAA7 (Indoleacetic acid-induced protein 7) {Arabidopsis thaliana}
245329_at	AT4G14365	12	4	I		NC	MC_I	532.3	568.4	550.35	P	P	0.001953	0.000732	801.9	1276.8	1039.35	P	P	0.000244	0.000244	0.8	0.5	1.4	1	0.925	0.377492	I	I	I	I	4	0.3	0.5	NC	I	AT4G14365	zinc finger (C3HC4-type RING finger) family protein / ankyrin repeat family protein contains Pfam profile: PF00097 zinc finger, C3HC4 type (RING finger) and Pfam profile: PF00023 ankyrin repeat
245274_at	AT4G14360	12	4		NC	NC	MC_D	1953	1974.8	1963.9	P	P	0.000244	0.000244	1517	1533.3	1525.15	P	P	0.000244	0.000244	-0.3	-0.3	-0.4	-0.3	-0.325	0.05	MD	NC	D	D	1	0	0	NC	NC	AT4G14360	dehydration-responsive protein-related similar to early-responsive to dehydration stress ERD3 protein [Arabidopsis thaliana] GI:15320410; contains Pfam profile PF03141: Putative methyltransferase
245284_at	AT4G14210	12	4		NC	NC	MC_D	4454.9	4150.1	4302.5	P	P	0.000244	0.000244	3519.9	3350	3434.95	P	P	0.000244	0.000244	-0.3	-0.3	-0.5	-0.5	-0.4	0.11547	MD	NC	D	D	1	0	-0.1	NC	NC	AT4G14210	phytoene dehydrogenase, chloroplast / phytoene desaturase (PDS) identical to SP|Q07356 Phytoene dehydrogenase, chloroplast precursor (EC 1.14.99.-) (Phytoene desaturase){Arabidopsis thaliana}; high similarity to phytoene desaturase [Lycopersicon esculent
245385_at	AT4G14020	12	4		NC	NC	MC_I	1970.1	2202.9	2086.5	P	P	0.000244	0.000244	2402.4	3042.5	2722.45	P	P	0.000244	0.000244	0.3	0.1	0.4	0.3	0.275	0.125831	I	NC	I	I	3	0.2	0.1	NC	NC	AT4G14020	rapid alkalinization factor (RALF) family protein
254726_at	AT4G13660	12	4		NC	NC	MC_D	1070.7	734.4	902.55	P	P	0.00293	0.00415	716.2	842.1	779.15	P	P	0.005859	0.00415	-0.6	-0.5	-0.4	-0.3	-0.45	0.129099	D	D	D	NC	3	-0.1	0.4	NC	NC	AT4G13660	pinoresinol-lariciresinol reductase, putative similar to pinoresinol-lariciresinol reductase TH1 [Tsuga heterophylla][GI:7578915]; contains isoflavone reductase domain PF02716
254756_at	AT4G13235	12	4		NC	NC	MC_D	837.8	840.1	838.95	P	P	0.000732	0.000244	753.3	692.4	722.85	P	P	0.001221	0.000244	-0.3	-0.5	-0.5	-0.6	-0.475	0.125831	NC	D	D	D	1	0.1	0	NC	NC	AT4G13235	hypothetical protein late embryogenesis abundant protein -Picea glauca,PID:g1161171
254791_at	AT4G12910	12	4	D		NC	MC_D	823.4	766.1	794.75	P	P	0.000732	0.000244	509.7	642.7	576.2	P	P	0.000732	0.001953	-0.3	-0.4	-0.7	-0.7	-0.525	0.206155	D	D	D	D	4	0	-0.3	NC	D	AT4G12910	serine carboxypeptidase S10 family protein SERINE CARBOXYPEPTIDASE I PRECURSOR - Hordeum vulgare, SWall:CBP1_HORVU
254783_at	AT4G12830	12	4		NC	NC	MC_D	724.7	1023.3	874	P	P	0.001953	0.001953	727.9	522.5	625.2	P	P	0.001953	0.001221	0.1	-0.5	-0.5	-0.8	-0.425	0.377492	NC	MD	MD	D	1	0.3	-0.5	NC	NC	AT4G12830	hydrolase, alpha/beta fold family protein low similarity to haloalkane dehalogenase from [Mycobacterium avium subsp. avium] GI:14422311, [Pseudomonas pavonaceae] GI:6689030; contains Pfam profile PF00561: hydrolase, alpha/beta fold family
254834_at	AT4G12300	12	4		NC	NC	MC_I	583.1	684.5	633.8	P	P	0.000244	0.000244	855	974.2	914.6	P	P	0.000244	0.000244	0.4	0.1	0.8	0.4	0.425	0.287228	I	NC	I	I	3	0.2	0.3	NC	NC	AT4G12300	cytochrome P450 family protein flavonoid 3',5'-hydroxylase - Campanula medium, PID:d1003951
254914_at	AT4G11290	12	4		NC	NC	MC_I	2812.3	2471	2641.65	P	P	0.000244	0.000244	3395.9	3773.7	3584.8	P	P	0.000244	0.000244	0.3	0.3	0.4	0.5	0.375	0.0957427	NC	I	I	I	1	-0.1	0.2	NC	NC	AT4G11290	peroxidase, putative identical to peroxidase ATP19a [Arabidopsis thaliana] gi|1546692|emb|CAA67337
255088_at	AT4G09350	12	4		NC	NC	MC_D	1474.2	1253.7	1363.95	P	P	0.000244	0.000244	917.9	779.2	848.55	P	P	0.000244	0.000244	-0.7	-0.3	-0.9	-0.6	-0.625	0.25	D	NC	D	D	3	-0.3	-0.3	NC	NC	AT4G09350	DNAJ heat shock N-terminal domain-containing protein similar to SP|Q45552 Chaperone protein dnaJ {Bacillus stearothermophilus}; contains Pfam profile PF00226: DnaJ domain
255080_at	AT4G09030	12	4		NC	NC	MC_I	2168	2334.6	2251.3	P	P	0.000244	0.000244	2950.1	3431.3	3190.7	P	P	0.000244	0.000244	0.3	0.3	0.5	0.5	0.4	0.11547	NC	I	I	I	1	0	0.1	NC	NC	AT4G09030	arabinogalactan-protein (AGP10) identical to gi|10880497|gb|AAG24278; supported by Ceres cDNA 265772
255065_s_at	AT4G08870	12	4	I		NC	MC_I	1928.7	1969.1	1948.9	P	P	0.000244	0.000244	2882.1	3756	3319.05	P	P	0.000244	0.000244	0.6	0.7	1	0.9	0.8	0.182574	I	I	I	I	4	0	0.4	NC	I	AT4G08870	arginase, putative similar to Swiss-Prot:P46637 arginase (EC 3.5.3.1) [Arabidopsis thaliana]
255116_at	AT4G08850	12	4	I		NC	MC_I	1263.9	1355.1	1309.5	P	P	0.000244	0.000244	1800.5	2594.6	2197.55	P	P	0.000244	0.000244	0.8	0.6	1	1	0.85	0.191485	I	I	I	I	4	0.1	0.3	NC	I	AT4G08850	leucine-rich repeat family protein / protein kinase family protein contains Pfam domains PF00560: Leucine Rich Repeat and PF00069: Protein kinase domain
255148_at	AT4G08500;AT4G08470	12	4		NC	NC	MC_I	248.2	272.1	260.15	P	P	0.001221	0.001953	332.5	445.5	389	P	P	0.000732	0.000732	0.7	0	0.9	0.5	0.525	0.386221	I	NC	I	I	3	0.5	0.3	NC	NC	AT4G08500;AT4G08470	[AT4G08500, mitogen-activated protein kinase kinase, putative similar to mitogen-activated protein kinase MEKK1 GP|1255448 [Arabidopsis thaliana]];[AT4G08470, mitogen-activated protein kinase, putative similar to mitogen-activated protein kinase [Arabid
255298_at	AT4G04840	12	4		NC	NC	MC_D	1216.1	1096.1	1156.1	P	P	0.000732	0.000732	770.6	882.8	826.7	P	P	0.000732	0.000732	-0.7	-0.5	-0.4	-0.3	-0.475	0.170783	D	D	D	NC	3	-0.2	0.3	NC	NC	AT4G04840	methionine sulfoxide reductase domain-containing protein / SeIR domain-containing protein low similarity to pilin-like transcription factor [Homo sapiens] GI:5059062; contains Pfam profile PF01641: SelR domain
255332_at	AT4G04340	12	4		NC	NC	MC_D	2416.6	2121.9	2269.25	P	P	0.000244	0.000244	1848.4	1751.3	1799.85	P	P	0.000244	0.000244	-0.5	-0.4	-0.4	-0.3	-0.4	0.0816497	D	D	D	NC	3	-0.1	0.1	NC	NC	AT4G04340	early-responsive to dehydration protein-related / ERD protein-related similar to ERD4 protein (early-responsive to dehydration stress) [Arabidopsis thaliana] GI:15375406; contains Pfam profile PF02714: Domain of unknown function DUF221
255331_at	AT4G04330	12	4	D	NC		MC_D	1449.2	2025.8	1737.5	P	P	0.000732	0.000244	1084.3	1155.9	1120.1	P	P	0.000244	0.000732	-0.4	-0.9	-0.4	-0.9	-0.65	0.288675	D	D	D	D	4	0.5	0	I	NC	AT4G04330	expressed protein
255411_at	AT4G03110	12	4		NC	NC	MC_D	1434.8	1589.2	1512	P	P	0.000244	0.000244	1035.4	1180.5	1107.95	P	P	0.000244	0.000244	-0.5	-0.6	-0.2	-0.2	-0.375	0.206155	D	D	NC	D	3	0.1	0.2	NC	NC	AT4G03110	RNA-binding protein, putative similar to Etr-1 [Danio rerio] GI:7670536, BRUNO-like 6 RNA-binding protein [Homo sapiens] GI:15341327, CUG-BP and ETR-3 like factor 3 [Homo sapiens] GI:12746392; contains InterPro entry IPR000504: RNA-binding region RNP-1 (
255488_at	AT4G02630	12	4		NC	NC	MC_D	1136.7	873.6	1005.15	P	P	0.000244	0.001953	844.9	537	690.95	P	P	0.001953	0.000732	-0.4	-0.2	-0.7	-0.6	-0.475	0.221736	D	NC	D	D	3	-0.2	-0.4	NC	NC	AT4G02630	protein kinase family protein contains protein kinase domain, Pfam:PF00069; contains serine/threonine protein kinase domain, INTERPRO:IPR002290
255524_at	AT4G02330	12	4	I		NC	MC_I	840	674.4	757.2	P	P	0.000244	0.000244	1241	1481	1361	P	P	0.000244	0.000244	0.6	0.7	1	1.1	0.85	0.238048	I	I	I	I	4	-0.2	0.4	NC	I	AT4G02330	pectinesterase family protein contains Pfam profile: PF01095 pectinesterase
255543_at	AT4G01870	12	4	D	NC		MC_D	6283.5	5095.6	5689.55	P	P	0.000732	0.000732	2334.2	3333.6	2833.9	P	P	0.001221	0.000244	-1.5	-1	-1.1	-0.7	-1.075	0.330404	D	D	D	D	4	-0.3	0.4	D	NC	AT4G01870	tolB protein-related contains weak similarity to TolB protein precursor (Swiss-Prot:P44677) [Haemophilus influenzae]
255604_at	AT4G01080	12	4		NC	NC	MC_I	719.2	701	710.1	P	P	0.000244	0.000732	1050.1	824.2	937.15	P	P	0.000244	0.000244	0.5	0.7	0.3	0.4	0.475	0.170783	I	I	NC	I	3	-0.2	-0.2	NC	NC	AT4G01080	expressed protein
255692_at	AT4G00400	12	4		NC	NC	MC_D	1166.9	1301.9	1234.4	P	P	0.000732	0.000244	976.4	984.5	980.45	P	P	0.000732	0.000732	-0.5	-0.6	-0.4	-0.4	-0.475	0.0957427	D	D	NC	D	3	0	0.1	NC	NC	AT4G00400	phospholipid/glycerol acyltransferase family protein
251162_at	AT3G63300	6	4		NC	NC	MC_D	264.9	337	300.95	P	P	0.037598	0.037598	263.1	196.4	229.75	P	P	0.046143	0.030273	-0.2	-0.5	-0.5	-0.7	-0.475	0.206155	NC	D	D	D	1	0.2	-0.2	NC	NC	AT3G63300	expressed protein
251242_at	AT3G61860	12	4		NC	NC	MC_I	2518.9	2753.5	2636.2	P	P	0.000244	0.000244	3213.1	3158.8	3185.95	P	P	0.000244	0.000244	0.4	0.4	0.3	0.2	0.325	0.0957427	I	I	I	NC	3	0.1	-0.2	NC	NC	AT3G61860	arginine/serine-rich splicing factor RSP31 (RSP31) identical to SP|P92964 Arginine/serine-rich splicing factor RSP31 {Arabidopsis thaliana}
251325_s_at	AT3G61470	12	4		NC	NC	MC_D	50720.9	49938.2	50329.6	P	P	0.000244	0.000244	40203.3	43609.4	41906.3	P	P	0.000244	0.000244	-0.3	-0.3	-0.3	-0.2	-0.275	0.05	D	D	D	MD	3	0	0.1	NC	NC	AT3G61470	chlorophyll A-B binding protein (LHCA2) identical to Lhca2 protein [Arabidopsis thaliana] GI:4741940; similar to chlorophyll A-B binding protein, chloroplast [Precursor] SP:P13869 from [Petunia hybrida]; contains Pfam profile: PF00504 chlorophyll A-B bin
251321_at	AT3G61460	12	4		NC	NC	MC_I	3514.9	3373.4	3444.15	P	P	0.000244	0.000244	3998	4032.6	4015.3	P	P	0.000244	0.000244	0.4	0.3	0.3	0.4	0.35	0.057735	I	MI	I	I	3	0	0	NC	NC	AT3G61460	zinc finger (C3HC4-type RING finger) family protein (BRH1) identical to BRH1 RING finger protein [Arabidopsis thaliana] GI:4689366; identical to cDNA BRH1 RING finger protein, GI:4689365
251360_at	AT3G61210	12	4		NC	NC	MC_D	459.7	551.2	505.45	P	P	0.000732	0.000244	267.2	280.2	273.7	P	P	0.01416	0.000244	-0.5	-0.8	-0.8	-0.9	-0.75	0.173205	D	D	NC	D	3	0.2	-0.1	NC	NC	AT3G61210	embryo-abundant protein-related similar to embryo-abundant protein [Picea glauca] GI:1350531
251307_at	AT3G61200	12	4		NC	NC	MC_I	1802.7	1901.6	1852.15	P	P	0.00293	0.001221	1927.5	2317	2122.25	P	P	0.001953	0.001221	0.2	0.2	0.5	0.3	0.3	0.141421	I	NC	I	I	3	0.1	0.2	NC	NC	AT3G61200	thioesterase family protein contains Pfam profile PF03061: thioesterase family protein
251443_at	AT3G59950;AT3G59940	12	4		NC	NC	MC_I	3469.5	3680.5	3575	P	P	0.000244	0.000244	4304.9	4678.6	4491.75	P	P	0.000244	0.000244	0.3	0.2	0.5	0.3	0.325	0.125831	I	NC	I	I	3	0.2	0.2	NC	NC	AT3G59950;AT3G59940	[AT3G59950, autophagy 4b (APG4b) identical to autophagy 4b [Arabidopsis thaliana] gi|19912145|dbj|BAB88384];[AT3G59940, kelch repeat-containing F-box family protein contains Pfam profiles PF01344: Kelch motif, PF00646: F-box domain]
251461_at	AT3G59780	12	4		NC	NC	MC_D	1440.3	1995.9	1718.1	P	P	0.000244	0.001221	1671.5	2636.7	2154.1	P	P	0.001221	0.00293	-0.1	-0.3	-0.3	-0.6	-0.325	0.206155	NC	D	D	D	1	0.3	-0.2	NC	NC	AT3G59780	expressed protein
251640_at	AT3G57450	12	4		NC	NC	MC_I	1808.8	1777.2	1793	P	P	0.000732	0.000732	2009.2	2666.6	2337.9	P	P	0.000244	0.000244	0.2	0.3	0.4	0.6	0.375	0.170783	NC	I	I	I	1	0	0.2	NC	NC	AT3G57450	expressed protein
251625_at	AT3G57260	12	4	I		NC	MC_I	393.9	355.2	374.55	P	P	0.023926	0.018555	846.8	1532.7	1189.75	P	P	0.000732	0.000244	1.1	1.1	1.9	2.1	1.55	0.525991	I	I	I	I	4	0.1	1.2	NC	I	AT3G57260	glycosyl hydrolase family 17 protein similar to glucan endo-1,3-beta-glucosidase, acidic isoform precursor SP:P33157 from [Arabidopsis thaliana]
246289_at	AT3G56880	12	4		NC	NC	MC_I	1742.3	1960.5	1851.4	P	P	0.000244	0.000244	2533.1	2820.7	2676.9	P	P	0.000244	0.000244	0.5	0.3	0.7	0.4	0.475	0.170783	I	MI	I	I	3	0.2	0.2	NC	NC	AT3G56880	VQ motif-containing protein contains PF05678: VQ motif
251727_at	AT3G56290	12	4	D	NC		MC_D	4567.9	3871	4219.45	P	P	0.000244	0.000244	2751.7	2548.4	2650.05	P	P	0.000244	0.000244	-0.8	-0.5	-0.8	-0.4	-0.625	0.206155	D	D	D	D	4	-0.3	-0.1	D	NC	AT3G56290	expressed protein
251745_at	AT3G55980	12	4		NC	NC	MC_I	606.1	592.4	599.25	P	P	0.001953	0.010742	663	962.6	812.8	P	P	0.005859	0.000244	0.5	0.3	0.7	0.6	0.525	0.170783	NC	I	I	I	1	0.2	0.1	NC	NC	AT3G55980	zinc finger (CCCH-type) family protein contains Pfam domain, PF00642: Zinc finger C-x8-C-x5-C-x3-H type (and similar) and Pfam domain, PF00023: Ankyrin repeat
251804_at	AT3G55430	12	4		NC	NC	MC_I	2118.7	1746.5	1932.6	P	P	0.000244	0.000244	2245.3	2643	2444.15	P	P	0.000244	0.000244	0.2	0.3	0.4	0.6	0.375	0.170783	NC	I	I	I	1	-0.2	0.2	NC	NC	AT3G55430	glycosyl hydrolase family 17 protein / beta-1,3-glucanase, putative similar to beta-1,3 glucanase GI:7414433 from [Pisum sativum]; contains Pfam profile PF00332: Glycosyl hydrolases family 17
251784_at	AT3G55330	12	4		NC	NC	MC_D	9024.7	8535.5	8780.1	P	P	0.000244	0.000244	6451.8	5825.3	6138.55	P	P	0.000244	0.000244	-0.4	-0.5	-0.6	-0.5	-0.5	0.0816497	D	MD	D	D	3	0	-0.2	NC	NC	AT3G55330	photosystem II reaction center PsbP family protein contains Pfam profile PF01789: PsbP
251860_at	AT3G54660	12	4		NC	NC	MC_D	5949.1	5087.9	5518.5	P	P	0.000244	0.000244	4093.2	4235.7	4164.45	P	P	0.000244	0.000244	-0.3	-0.3	-0.3	-0.2	-0.275	0.05	D	MD	D	NC	2	-0.1	0	NC	NC	AT3G54660	gluthatione reductase, chloroplast nearly identical to SP|P42770 Glutathione reductase, chloroplast precursor (EC 1.8.1.7) (GR) (GRASE) {Arabidopsis thaliana}; identical to cDNA glutathione reductase GI:451197
251899_at	AT3G54400	12	4	I		NC	MC_I	4377.2	4344.9	4361.05	P	P	0.000244	0.000244	5224.9	6859.9	6042.4	P	P	0.000244	0.000244	0.3	0.3	0.7	0.6	0.475	0.206155	I	I	I	I	4	0	0.4	NC	I	AT3G54400	aspartyl protease family protein contains Pfam profile: PF00026 eukaryotic aspartyl protease
251958_at	AT3G53560	12	4		NC	NC	MC_I	3560.5	3559.8	3560.15	P	P	0.000244	0.000244	4290	4672.3	4481.15	P	P	0.000244	0.000244	0.3	0.3	0.2	0.3	0.275	0.05	I	I	I	NC	3	0	0	NC	NC	AT3G53560	chloroplast lumen common family protein
251942_at	AT3G53480	12	4		NC	NC	MC_D	2115.7	2110.6	2113.15	P	P	0.000244	0.000244	1521	1376	1448.5	P	P	0.000244	0.000244	-0.5	-0.3	-0.6	-0.5	-0.475	0.125831	D	NC	D	D	3	-0.3	0	NC	NC	AT3G53480	ABC transporter family protein PDR5-like ABC transporter, Spirodela polyrrhiza, EMBL:Z70524
252048_at	AT3G52500	12	4		NC	NC	MC_I	4105.4	4070	4087.7	P	P	0.000244	0.000244	4962.1	5520.8	5241.45	P	P	0.000244	0.000244	0.2	0.2	0.4	0.3	0.275	0.0957427	I	NC	I	I	3	0.1	0.1	NC	NC	AT3G52500	aspartyl protease family protein contains Pfam PF00026: eukaryotic aspartyl protease
252117_at	AT3G51430	12	4	I		NC	MC_I	791.8	1034.2	913	P	P	0.000244	0.000732	1851.1	2356.8	2103.95	P	P	0.000244	0.000244	0.8	0.5	1.3	0.9	0.875	0.330404	I	I	I	I	4	0.3	0.4	NC	I	AT3G51430	strictosidine synthase, putative (YLS2) similar to hemomucin [Drosophila melanogaster][GI:1280434], strictosidine synthase [Rauvolfia serpentina][SP|P15324]; contains strictosidine synthase domain PF03088; identical to cDNA YLS2 mRNA for strictosidine sy
252098_at	AT3G51330	12	4		NC	NC	MC_D	706	608.9	657.45	P	P	0.001221	0.001221	229.8	418.1	323.95	P	P	0.008057	0.008057	-1.1	-0.7	-0.4	-0.4	-0.65	0.331662	D	D	D	NC	3	-0.1	0.4	NC	NC	AT3G51330	aspartyl protease family protein contains Eukaryotic and viral aspartyl proteases active site, PROSITE:PS00141
252094_at	AT3G51260	12	4		NC	NC	MC_I	3692.2	3906.8	3799.5	P	P	0.000244	0.000244	4529.8	4822	4675.9	P	P	0.000244	0.000244	0.3	0.2	0.4	0.3	0.3	0.0816497	I	NC	I	MI	2	0	0.1	NC	NC	AT3G51260	20S proteasome alpha subunit D (PAD1)
252095_at	AT3G51000	12	4		NC	NC	MC_I	937.3	1207.7	1072.5	P	P	0.000244	0.000244	1173.2	1465	1319.1	P	P	0.000244	0.000244	0.5	0.2	0.6	0.3	0.4	0.182574	I	NC	I	I	3	0.3	0.1	NC	NC	AT3G51000	epoxide hydrolase, putative similar to epoxide hydrolase [Glycine max] GI:2764806; contains Pfam profile PF00561: hydrolase, alpha/beta fold family
252131_at	AT3G50930	12	4		NC	NC	MC_I	116.3	124.2	120.25	P	P	0.046143	0.001221	296.8	360.9	328.85	P	P	0.001953	0.000244	0.7	1.5	1.2	1.4	1.2	0.355903	I	NC	I	I	3	-0.3	0.2	NC	NC	AT3G50930	AAA-type ATPase family protein contains Pfam profile: ATPase family PF00004
252132_at	AT3G50790	12	4		NC	NC	MC_D	2053.4	2035.3	2044.35	P	P	0.001221	0.001221	1516.2	1568.1	1542.15	P	P	0.008057	0.010742	-0.3	-0.4	-0.3	-0.5	-0.375	0.0957427	NC	D	D	D	1	0.1	-0.1	NC	NC	AT3G50790	late embryogenesis abundant protein, putative / LEA protein, putative similar to Picea glauca late embryogenesis abundant protein (EMB8), PID:g1350545 SP|Q40863; contains Pfam profile PF00561: hydrolase, alpha/beta fold family
252181_at	AT3G50685	12	4		NC	NC	MC_D	11741.4	12111.8	11926.6	P	P	0.000244	0.000244	8691.4	10075.4	9383.4	P	P	0.000244	0.000244	-0.3	-0.4	-0.3	-0.4	-0.35	0.057735	D	D	NC	D	3	0.1	0	NC	NC	AT3G50685	expressed protein
252215_at	AT3G50240	8	4		NC	NC	MC_D	358.7	391.4	375.05	P	P	0.008057	0.00293	209.9	199.5	204.7	P	P	0.018555	0.01416	-0.4	-0.7	-0.9	-0.9	-0.725	0.236291	D	NC	D	D	3	0.3	-0.3	NC	NC	AT3G50240	kinesin motor protein-related KINESIN-LIKE PROTEIN KIF4, Homo sapiens, EMBL:AF179308
252193_at	AT3G50060	12	4		NC	NC	MC_I	675.4	769.7	722.55	P	P	0.001953	0.00415	715.8	761.8	738.8	P	P	0.000732	0.000244	0.6	0.3	0.5	0.4	0.45	0.129099	MI	I	I	I	1	0.2	0.1	NC	NC	AT3G50060	myb family transcription factor contains Pfam profile: PF00249 myb-like DNA-binding domain; identical to cDNA MYB-related protein (1107 bp) GI:1263096
252340_at	AT3G48920	12	4		NC	NC	MC_D	733.2	567.8	650.5	P	P	0.001953	0.001221	382.4	639.2	510.8	P	P	0.005859	0.010742	-0.8	-0.5	-0.3	-0.1	-0.425	0.298608	D	D	D	NC	3	-0.4	0.4	NC	NC	AT3G48920	myb family transcription factor (MYB45) similar to MybHv33 GI:456214 from [Hordeum vulgare]; contains PFAM profile: myb DNA binding domain PF00249
252377_at	AT3G47950;AT3G47960	12	4		NC	NC	MC_I	1443	1255.8	1349.4	P	P	0.000732	0.000244	1590.1	1666.7	1628.4	P	P	0.000244	0.000244	0.2	0.4	0.3	0.4	0.325	0.0957427	NC	I	I	MI	1	-0.1	0	NC	NC	AT3G47950;AT3G47960	[AT3G47950, ATPase, plasma membrane-type, putative / proton pump, putative strong similarity to P-type H(+)-transporting ATPase from Nicotiana plumbaginifolia [SP|Q08435, SP|Q08436], Lycopersicon esculentum [GI:5901757, SP|P22180], Solanum tuberosum [GI:
252417_at	AT3G47480	12	4		NC	NC	MC_I	178.5	226.7	202.6	P	P	0.005859	0.008057	296	483	389.5	P	P	0.000244	0.000244	0.8	0.6	0.9	1.1	0.85	0.208167	I	NC	I	I	3	0.4	0.5	NC	NC	AT3G47480	calcium-binding EF hand family protein contains INTERPRO:IPR002048 calcium-binding EF-hand domain
252430_at	AT3G47470	12	4		NC	NC	MC_D	52489.4	47401.5	49945.4	P	P	0.000244	0.000244	36882.3	41250.8	39066.6	P	P	0.000244	0.000244	-0.5	-0.4	-0.3	-0.2	-0.35	0.129099	D	D	D	NC	3	-0.1	0.1	NC	NC	AT3G47470	chlorophyll A-B binding protein 4, chloroplast / LHCI type III CAB-4 (CAB4) identical to SP|P27521 Chlorophyll A-B binding protein 4, chloroplast precursor (LHCI type III CAB-4) (LHCP) {Arabidopsis thaliana}
252411_at	AT3G47430	12	4		NC	NC	MC_D	2990.7	2690.3	2840.5	P	P	0.000244	0.000244	2324.2	2221.8	2273	P	P	0.000244	0.000244	-0.4	-0.2	-0.5	-0.3	-0.35	0.129099	D	NC	D	MD	2	-0.2	-0.1	NC	NC	AT3G47430	peroxisomal biogenesis factor 11 family protein / PEX11 family protein contains Pfam PF05648: Peroxisomal biogenesis factor 11 (PEX11)
252463_at	AT3G47070	12	4		NC	NC	MC_D	10881.1	9535.4	10208.2	P	P	0.01416	0.005859	7851.5	7164	7507.75	P	P	0.010742	0.01416	-0.5	-0.4	-0.5	-0.4	-0.45	0.057735	D	D	NC	D	3	0	0	NC	NC	AT3G47070	expressed protein
252563_at	AT3G45970;AT3G45980	12	4	I		NC	MC_I	415.1	414.2	414.65	P	P	0.001953	0.000244	609.3	1027.4	818.35	P	P	0.000244	0.000244	0.6	0.6	1.3	1.2	0.925	0.377492	I	I	I	I	4	-0.2	0.6	NC	I	AT3G45970;AT3G45980	[AT3G45970, expansin family protein (EXPL1) similar to cim1 induced allergen, Glycine max, EMBL:U03860; expansin-like gene, PMID:11641069, www.bio.psu.edu/expansins];[AT3G45980, histone H2B identical to histone H2B Arabidopsis thaliana GI:2407802; conta
252543_at	AT3G45780	12	4		NC	NC	MC_D	3249	3167.7	3208.35	P	P	0.000244	0.000244	2766.4	2356.1	2561.25	P	P	0.000244	0.000244	-0.2	-0.3	-0.4	-0.4	-0.325	0.0957427	D	MD	D	D	3	0	-0.1	NC	NC	AT3G45780	protein kinase / nonphototropic hypocotyl protein 1 (NPH1) / phototropin identical to SP|O48963 Nonphototropic hypocotyl protein 1 (EC 2.7.1.37) (Phototropin) {Arabidopsis thaliana}, cDNA nonphototropic hypocotyl 1 (NPH1) GI:2832240; contains Pfam profil
252576_s_at	AT3G45450	12	4		NC	NC	MC_I	481.3	333.2	407.25	P	P	0.000732	0.000244	657.1	675.6	666.35	P	P	0.000244	0.00415	0.5	0.9	0.6	0.3	0.575	0.25	I	I	NC	I	3	-0.2	-0.1	NC	NC	AT3G45450	Clp amino terminal domain-containing protein contains Pfam profile: PF02861 Clp amino terminal domain
252618_at	AT3G45140	12	4	I	NC		MC_I	8032.3	10358.2	9195.25	P	P	0.000244	0.000244	21523	19019.5	20271.2	P	P	0.000244	0.000244	1.5	1.1	1.3	1	1.225	0.221736	I	I	I	I	4	0.4	-0.1	I	NC	AT3G45140	lipoxygenase (LOX2) identical to SP|P38418
258003_at	AT3G29030	12	4	D		NC	MC_D	1621.1	1342.8	1481.95	P	P	0.000244	0.000244	721.2	734.7	727.95	P	P	0.000244	0.000732	-1	-0.8	-1.1	-0.8	-0.925	0.15	D	D	D	D	4	-0.2	-0.2	NC	D	AT3G29030	expansin, putative (EXP5) identical to expansin At-EXP5 GB:AAB38071 from [Arabidopsis thaliana]; alpha-expansin gene family, PMID:11641069
258000_at	AT3G28940	12	4		NC	NC	MC_I	2031.3	2329.1	2180.2	P	P	0.000244	0.000732	2820.7	2797.6	2809.15	P	P	0.000244	0.000244	0.4	0.1	0.4	0.4	0.325	0.15	I	NC	I	MI	2	0.1	-0.1	NC	NC	AT3G28940	avirulence-responsive protein, putative / avirulence induced gene (AIG) protein, putative strong similarity to SP|P54121 AIG2 protein (avrRpt2-induced gene) {Arabidopsis thaliana}
256589_at	AT3G28730;AT3G28740	12	4	D	NC		MC_D	3929	3080.4	3504.7	P	P	0.000244	0.000244	1543.3	1831.7	1687.5	P	P	0.000244	0.000244	-1.3	-1	-1.2	-0.8	-1.075	0.221736	D	D	D	D	4	-0.3	0.2	MD	NC	AT3G28730;AT3G28740	[AT3G28730, structure-specific recognition protein 1 / high mobility group protein / HMG protein nearly identical to SP|Q05153 Structure-specific recognition protein 1 homolog (HMG protein) {Arabidopsis thaliana}; contains Pfam profile PF00505: HMG (high
256577_at	AT3G28220	12	4	I		NC	MC_I	485.3	590.7	538	P	P	0.001221	0.00293	1160.6	740.2	950.4	P	P	0.000732	0.000732	1.3	0.9	0.7	0.4	0.825	0.377492	I	I	I	I	4	0.2	-0.6	NC	D	AT3G28220	meprin and TRAF homology domain-containing protein / MATH domain-containing protein similar to ubiquitin-specific protease 12 [Arabidopsis thaliana] GI:11993471; contains Pfam profile PF00917: MATH domain
257222_at	AT3G27925	12	4		NC	NC	MC_D	4748.2	4711.4	4729.8	P	P	0.000244	0.000244	4045.7	3904.6	3975.15	P	P	0.000244	0.000244	-0.3	-0.3	-0.2	-0.2	-0.25	0.057735	MD	D	D	NC	1	0	0	NC	NC	AT3G27925	DegP protease, putative SP:022609; almost identical to DegP protease precursor GB:AF028842 from [Arabidopsis thaliana] (J. Biol. Chem. 273 (12), 7094-7098 (1998))
258239_at	AT3G27690	12	4	D		NC	MC_D	23344.6	19861.7	21603.2	P	P	0.000244	0.000244	7986.9	11137.5	9562.2	P	P	0.000244	0.000732	-1.4	-1.5	-0.9	-1	-1.2	0.294392	D	D	D	D	4	0.1	0.5	NC	I	AT3G27690	chlorophyll A-B binding protein (LHCB2:4) nearly identical to Lhcb2 protein [Arabidopsis thaliana] GI:4741950; similar to chlorophyll A-B binding protein 151 precursor (LHCP) GB:P27518 from [Gossypium hirsutum]; contains Pfam PF00504: Chlorophyll A-B bin
257710_at	AT3G27350	12	4		NC	NC	MC_D	893.9	677.4	785.65	P	P	0.001953	0.000244	580.8	455.3	518.05	P	P	0.000732	0.001221	-0.6	-0.1	-0.5	-0.3	-0.375	0.221736	D	NC	D	D	3	-0.3	-0.1	NC	NC	AT3G27350	expressed protein
257789_at	AT3G27020	12	4		NC	NC	MC_D	1998.2	2009.6	2003.9	P	P	0.000244	0.000244	1717.6	1648.1	1682.85	P	P	0.000244	0.000244	-0.4	-0.4	-0.3	-0.2	-0.325	0.0957427	D	D	NC	D	3	0	0.1	NC	NC	AT3G27020	oligopeptide transporter OPT family protein similar to iron-phytosiderophore transporter protein yellow stripe 1 [Zea mays] GI:10770865; contains Pfam profile PF03169: OPT oligopeptide transporter protein
257807_at	AT3G26650	12	4		NC	NC	MC_D	57787.2	57022.7	57404.9	P	P	0.000244	0.000244	47069.9	45330.4	46200.2	P	P	0.000244	0.000244	-0.2	-0.2	-0.4	-0.3	-0.275	0.0957427	D	NC	D	D	3	-0.1	-0.1	NC	NC	AT3G26650	glyceraldehyde 3-phosphate dehydrogenase A, chloroplast (GAPA) / NADP-dependent glyceraldehydephosphate dehydrogenase subunit A identical to SP|P25856 Glyceraldehyde 3-phosphate dehydrogenase A, chloroplast precursor (EC 1.2.1.13) (NADP-dependent glycera
257624_at	AT3G26230;AT3G26220	12	4	I		NC	MC_I	196.3	217	206.65	P	P	0.037598	0.023926	344.6	424.6	384.6	P	P	0.008057	0.001221	0.7	0.7	0.9	1.2	0.875	0.236291	I	I	I	I	4	0.1	0.3	NC	I	AT3G26230;AT3G26220	[AT3G26230, cytochrome P450 family protein contains Pfam profile: PF00067 cytochrome P450];[AT3G26220, cytochrome P450 family protein identical to cytochrome P450 monooxygenase (CYP71B3) GB:D78602 [Arabidopsis thaliana] (Plant Mol. Biol. 37 (1), 39-52 (
257623_at	AT3G26210	12	4	I		NC	MC_I	414.3	575.7	495	P	P	0.000244	0.001221	792.2	1478.7	1135.45	P	P	0.000732	0.000244	0.8	0.3	1.7	1.1	0.975	0.585235	I	I	I	I	4	0.4	0.8	NC	I	AT3G26210	cytochrome P450 71B23, putative (CYP71B23) Identical to Cytochrome P450 71B23 (SP:Q9LTM0)[Arabidopsis thaliana];contains Pfam profile: PF00067 cytochrome P450
257642_at	AT3G25710	10	4		NC	NC	MC_D	420.3	305.4	362.85	P	P	0.000244	0.005859	185.3	188.3	186.8	P	P	0.000244	0.001221	-1	-0.7	-0.9	-0.5	-0.775	0.221736	D	NC	D	D	3	-0.4	-0.1	NC	NC	AT3G25710	basic helix-loop-helix (bHLH) family protein contains Pfam profile: PF00010 helix-loop-helix DNA-binding domain
257162_s_at	AT3G24290	12	4	D		NC	MC_D	923.7	758.4	841.05	P	P	0.000244	0.000244	432.7	511.6	472.15	P	P	0.000732	0.000732	-1.1	-0.9	-0.9	-0.6	-0.875	0.206155	D	D	D	D	4	-0.3	0.3	NC	I	AT3G24290	ammonium transporter, putative similar to SP|Q9SQH9|AT13_ARATH Ammonium transporter 1, member 3 (AtAMT1;3) {Arabidopsis thaliana}; contains Pfam profile PF00909: Ammonium Transporter Family
257253_at	AT3G24190	12	4		NC	NC	MC_D	3039.6	2838.6	2939.1	P	P	0.000244	0.000244	2424.6	2122.1	2273.35	P	P	0.000244	0.000244	-0.4	-0.1	-0.5	-0.3	-0.325	0.170783	D	NC	D	MD	2	-0.3	-0.1	NC	NC	AT3G24190	ABC1 family protein contains Pfam domain, PF03109: ABC1 family
256865_at	AT3G23820	12	4		NC	NC	MC_D	11793.6	10623.2	11208.4	P	P	0.000244	0.000244	8910.4	6821.6	7866	P	P	0.000244	0.001221	-0.4	-0.3	-0.5	-0.4	-0.4	0.0816497	D	NC	D	D	3	-0.1	-0.1	NC	NC	AT3G23820	NAD-dependent epimerase/dehydratase family protein similar to nucleotide sugar epimerase from Vibrio vulnificus GI:3093975 [PID:g3093975], WbnF [Escherichia coli] GI:5739472, CAPI protein {Staphylococcus aureus} SP|P39858; contains Pfam profile: PF01370
258108_at	AT3G23570	12	4		NC	NC	MC_I	2431	2684.5	2557.75	P	P	0.001221	0.000732	2833	3320.5	3076.75	P	P	0.000244	0.000244	0.5	0.4	0.5	0.4	0.45	0.057735	I	NC	I	I	3	0.2	0	NC	NC	AT3G23570	dienelactone hydrolase family protein similar to SP|Q9ZT66 Endo-1,3;1,4-beta-D-glucanase precursor (EC 3.2.1.-) {Zea mays}; contains Pfam profile: PF01738 dienelactone hydrolase family
257925_at	AT3G23170	12	4		NC	NC	MC_I	404.3	432.7	418.5	P	P	0.000244	0.001221	684.7	589.4	637.05	P	P	0.000244	0.000732	0.7	0.5	0.7	0.4	0.575	0.15	I	I	I	NC	3	0	-0.1	NC	NC	AT3G23170	expressed protein
256927_at	AT3G22550	12	4		NC	NC	MC_I	951.9	932.2	942.05	P	P	0.000732	0.000244	1470	1169.8	1319.9	P	P	0.000732	0.000244	0.7	0.4	0.4	0.3	0.45	0.173205	I	I	I	NC	3	0.1	-0.2	NC	NC	AT3G22550	senescence-associated protein-related similar to senescence-associated protein SAG102 (GI:22331931) [Arabidopsis thaliana]
256926_at	AT3G22540	12	4		NC	NC	MC_D	275.8	375.4	325.6	P	P	0.000244	0.000244	283.1	243.4	263.25	P	P	0.000732	0.000244	-0.7	-0.4	-0.7	-0.8	-0.65	0.173205	D	NC	D	D	3	0	-0.2	NC	NC	AT3G22540	expressed protein
257940_at	AT3G21790	12	4		NC	NC	MC_I	350.8	530.3	440.55	P	P	0.000244	0.000244	682.7	445.2	563.95	P	P	0.000244	0.000244	0.2	0.3	0.5	0.6	0.4	0.182574	NC	I	I	I	1	0	0.2	NC	NC	AT3G21790	UDP-glucoronosyl/UDP-glucosyl transferase family protein contains Pfam profile: PF00201 UDP-glucoronosyl and UDP-glucosyl transferase
258181_at	AT3G21670	12	4		NC	NC	MC_D	4080.5	3870.4	3975.45	P	P	0.000244	0.000244	3653.8	2973.3	3313.55	P	P	0.000244	0.000244	-0.3	-0.2	-0.7	-0.5	-0.425	0.221736	D	NC	D	D	3	-0.1	-0.3	NC	NC	AT3G21670	nitrate transporter (NTP3) nearly identical to nitrate transporter [Arabidopsis thaliana] GI:4490323; contains Pfam profile: PF00854 POT family
257680_at	AT3G20330	12	4		NC	NC	MC_I	2691.7	2582.9	2637.3	P	P	0.000244	0.000244	3633.7	3173.7	3403.7	P	P	0.000244	0.000244	0.3	0.4	0.3	0.3	0.325	0.05	I	I	NC	I	3	-0.1	-0.1	NC	NC	AT3G20330	aspartate carabmoyltransferase, chloroplast / aspartate transcarbamylase / ATCase (PYRB) identical to SP|P49077 Aspartate carbamoyltransferase, chloroplast precursor (EC 2.1.3.2) (Aspartate transcarbamylase) (ATCase) {Arabidopsis thaliana}
258023_at	AT3G19450	12	4		NC	NC	MC_D	3691.1	3291.1	3491.1	P	P	0.000244	0.000244	2581.5	2792.7	2687.1	P	P	0.000244	0.000244	-0.5	-0.3	-0.4	-0.3	-0.375	0.0957427	D	D	D	NC	3	-0.1	0.1	NC	NC	AT3G19450	cinnamyl-alcohol dehydrogenase (CAD) identical to SP|P48523 Cinnamyl-alcohol dehydrogenase (EC 1.1.1.195) (CAD) [Arabidopsis thaliana]
258017_at	AT3G19370	12	4		NC	NC	MC_D	665.5	514.5	590	P	P	0.000244	0.000244	415.2	256.3	335.75	P	P	0.000244	0.000732	-0.5	-0.3	-1.1	-0.7	-0.65	0.341565	D	NC	D	D	3	-0.2	-0.5	NC	NC	AT3G19370	expressed protein
256655_at	AT3G18890	12	4		NC	NC	MC_D	3272.9	3260.3	3266.6	P	P	0.000244	0.000244	2576.6	2403.9	2490.25	P	P	0.000244	0.000244	-0.4	-0.4	-0.4	-0.5	-0.425	0.05	NC	D	D	D	1	0	-0.1	NC	NC	AT3G18890	expressed protein similar to UV-B and ozone similarly regulated protein 1 UOS1 [Pisum sativum] GI:20339364
257801_at	AT3G18750	12	4		NC	NC	MC_D	407.6	360.9	384.25	P	P	0.000244	0.000244	307	279.7	293.35	P	P	0.001953	0.010742	-0.6	-0.5	-0.8	-0.5	-0.6	0.141421	MD	NC	D	D	1	-0.1	0.1	NC	NC	AT3G18750	protein kinase family protein contains protein kinase domain, Pfam:PF00069
256799_at	AT3G18560	12	4		NC	NC	MC_D	731	585.9	658.45	P	P	0.01416	0.023926	374.9	411.7	393.3	P	P	0.046143	0.023926	-0.8	-0.6	-0.7	-0.4	-0.625	0.170783	D	D	D	NC	3	-0.2	0.1	NC	NC	AT3G18560	expressed protein
258214_at	AT3G17970	12	4		NC	NC	MC_I	400.3	400.4	400.35	P	P	0.001221	0.001221	600.6	523	561.8	P	P	0.001221	0.000244	0.5	0.4	0.3	0.3	0.375	0.0957427	NC	I	I	I	1	-0.1	0	NC	NC	AT3G17970	chloroplast outer membrane translocon subunit, putative similar to Toc64 [Pisum sativum] GI:7453538; contains Pfam profile PF00515 TPR Domain
258351_at	AT3G17700	11	4		NC	NC	MC_I	256.5	267.4	261.95	P	P	0.010742	0.01416	315.3	383.5	349.4	P	P	0.000732	0.001953	0.3	0.1	0.7	0.5	0.4	0.258199	I	NC	I	I	3	0.4	0.3	NC	NC	AT3G17700	cyclic nucleotide-binding transporter 1 / CNBT1 (CNGC20) identical to cyclic nucleotide-binding transporter 1 (CNBT1) GI:8131898 from [Arabidopsis thaliana]; member of the cyclic nucleotide-gated channel (CNGC) family- see PMID:11500563
258349_at	AT3G17609	12	4		NC	NC	MC_D	637.1	636.4	636.75	P	P	0.00293	0.000732	465	504.8	484.9	P	P	0.000732	0.000732	-0.5	-0.5	-0.3	-0.3	-0.4	0.11547	D	D	D	NC	3	0.1	0.2	NC	NC	AT3G17609	bZIP transcription factor family protein / HY5-like protein (HYH) nearly identical to HY5-like protein [Arabidopsis thaliana] GI:18042111; similar to TGACG-motif binding factor GI:2934884 from [Glycine max]; contains Pfam profile: PF00170 bZIP transcript
257932_at	AT3G17040	12	4		NC	NC	MC_D	1167.7	1116.6	1142.15	P	P	0.000244	0.000244	889.6	920.5	905.05	P	P	0.000244	0.000244	-0.4	-0.5	-0.5	-0.4	-0.45	0.057735	D	D	MD	D	3	0	-0.1	NC	NC	AT3G17040	tetratricopeptide repeat (TPR)-containing protein low similarity to SP|Q9FNS4 PsbB mRNA maturation factor Mbb1, chloroplast precursor {Chlamydomonas reinhardtii}; contains Pfam profile: PF00515: TPR Domain
258436_at	AT3G16720	12	4		NC	NC	MC_I	414.2	377	395.6	P	P	0.008057	0.005859	486	407.4	446.7	P	P	0.001953	0.000244	0.3	0.3	0.4	0.6	0.4	0.141421	I	NC	I	I	3	0	-0.1	NC	NC	AT3G16720	zinc finger (C3HC4-type RING finger) family protein contains Pfam domain, PF00097: Zinc finger, C3HC4 type (RING finger)
258419_at	AT3G16670	12	4	D	NC		MC_D	6240.7	8324.9	7282.8	P	P	0.000244	0.000244	571.6	828.5	700.05	P	P	0.000732	0.000244	-3.1	-3.5	-2.8	-3.3	-3.175	0.298608	D	D	D	D	4	0.4	0.5	I	NC	AT3G16670	expressed protein
259384_at	AT3G16450	12	4		NC	NC	MC_I	4805.5	4186	4495.75	P	P	0.000732	0.000732	5462.8	6553.4	6008.1	P	P	0.000732	0.000244	0.1	0.3	0.4	0.5	0.325	0.170783	NC	I	I	I	1	0	0.2	NC	NC	AT3G16450	jacalin lectin family protein similar to SP|Q9SAV1 Myrosinase binding protein-like At1g52030 {Arabidopsis thaliana}; contains Pfam profile: PF01419 jacalin-like lectin domain
258049_at	AT3G16220	12	4		NC	NC	MC_D	751.5	754.8	753.15	P	P	0.000244	0.000244	572.2	508.9	540.55	P	P	0.000732	0.000244	-0.4	-0.4	-0.6	-0.6	-0.5	0.11547	NC	D	D	D	1	0.1	-0.1	NC	NC	AT3G16220	expressed protein similar to CGI-18 protein GB:AAD27727 [Homo sapiens]
258285_at	AT3G16140	12	4		NC	NC	MC_D	40516.2	37161.3	38838.8	P	P	0.000244	0.000244	28977.3	29962.7	29470	P	P	0.000244	0.000244	-0.5	-0.4	-0.3	-0.2	-0.35	0.129099	D	D	D	MD	3	-0.1	0.1	NC	NC	AT3G16140	photosystem I reaction center subunit VI, chloroplast, putative / PSI-H, putative (PSAH1) identical to SP|Q9SUI7; similar to PSI-H precursor [Nicotiana sylvestris] GI:407353; contains Pfam profile PF03244: Photosystem I reaction centre subunit VI
257800_at	AT3G15900	12	4		NC	NC	MC_D	1733.9	1459.2	1596.55	P	P	0.000244	0.000244	1132.1	1349.2	1240.65	P	P	0.000244	0.000244	-0.5	-0.6	-0.3	-0.4	-0.45	0.129099	D	D	NC	MD	2	0	0.1	NC	NC	AT3G15900	expressed protein
258250_at	AT3G15850	12	4		NC	NC	MC_D	9728.3	9649.3	9688.8	P	P	0.000244	0.000244	7890.8	7404.5	7647.65	P	P	0.000244	0.000244	-0.3	-0.3	-0.3	-0.2	-0.275	0.05	D	D	MD	NC	2	-0.1	0	NC	NC	AT3G15850	fatty acid desaturase family protein similar to delta 9 acyl-lipid desaturase (ADS1) GI:2970034 from [Arabidopsis thaliana]
258222_at	AT3G15680	12	4		NC	NC	MC_D	1553.6	1588.8	1571.2	P	P	0.000244	0.000244	1286.2	1036.3	1161.25	P	P	0.000244	0.000244	-0.3	-0.3	-0.7	-0.7	-0.5	0.23094	MD	D	D	D	1	0	-0.4	NC	NC	AT3G15680	zinc finger (Ran-binding) family protein contains Pfam domain, PF00641: Zn-finger in Ran binding protein and others
258366_at	AT3G14230	12	4	I		NC	MC_I	2464.9	2388.8	2426.85	P	P	0.000244	0.000244	3257.5	4325.7	3791.6	P	P	0.000244	0.000244	0.5	0.4	0.8	0.8	0.625	0.206155	I	I	I	I	4	0	0.4	NC	I	AT3G14230	AP2 domain-containing protein RAP2.2 (RAP2.2) identical to AP2 domain containing protein RAP2.2 GI:2281629 from [Arabidopsis thaliana]
256245_at	AT3G12580	12	4	I	NC		MC_I	1422.5	997.5	1210	P	P	0.000244	0.000244	2337.9	2309.2	2323.55	P	P	0.000244	0.000244	0.6	1.1	0.6	1.1	0.85	0.288675	I	I	I	I	4	-0.5	0	D	NC	AT3G12580	heat shock protein 70, putative / HSP70, putative strong similarity to heat shock protein GI:425194 [Spinacia oleracea]
256275_at	AT3G12110	12	4		NC	NC	MC_D	1200.8	1157.1	1178.95	P	P	0.000732	0.000732	941.5	935.7	938.6	P	P	0.001221	0.000732	-0.5	-0.4	-0.4	-0.3	-0.4	0.0816497	D	D	D	NC	3	-0.2	0.1	NC	NC	AT3G12110	actin 11 (ACT11) identical to SP|P53496 Actin 11 {Arabidopsis thaliana}
258782_at	AT3G11750	12	4		NC	NC	MC_D	252.7	402.6	327.65	P	P	0.000244	0.000244	157.6	198.3	177.95	P	P	0.01416	0.000244	-0.5	-0.6	-0.6	-0.6	-0.575	0.05	D	D	NC	D	3	-0.1	0.2	NC	NC	AT3G11750	dihydroneopterin aldolase, putative similar to SP|P28823 Dihydroneopterin aldolase (EC 4.1.2.25) (DHNA) {Bacillus subtilis}; contains Pfam profile PF02152: dihydroneopterin aldolase
256429_at	AT3G11040	12	4		NC	NC	MC_I	333.6	277.2	305.4	P	P	0.00415	0.01416	401.6	287.1	344.35	P	P	0.000244	0.001221	0.6	0.6	0.3	0.3	0.45	0.173205	I	I	NC	I	3	0	-0.4	NC	NC	AT3G11040	glycosyl hydrolase family 85 protein contains similarity to endo-b-N-acetylglucosaminidase GI:13774138 from [Mucor hiemalis]
258925_at	AT3G10420	12	4		NC	NC	MC_D	2194.9	2053.5	2124.2	P	P	0.000732	0.001221	1418.4	1618.3	1518.35	P	P	0.00293	0.00293	-0.7	-0.6	-0.5	-0.3	-0.525	0.170783	D	D	D	NC	3	-0.1	0.3	NC	NC	AT3G10420	sporulation protein-related similar to hypothetical proteins: GB:P51281 [Chloroplast Porphyra purpurea], GB:BAA16982 [Synechocystis sp], GB:P49540 [Odontella sinensis], GB:AAB82669 [Chloroplast Cyanidium caldarium]; similar to stage III sporulation prote
258938_at	AT3G10080	12	4		NC	NC	MC_D	1236.9	1154.4	1195.65	P	P	0.000244	0.000732	873.3	965	919.15	P	P	0.001221	0.000732	-0.4	-0.3	-0.5	-0.5	-0.425	0.0957427	D	D	NC	D	3	0	-0.1	NC	NC	AT3G10080	germin-like protein, putative similar to germin-like protein 2 [Oryza sativa] GI:2655287
258929_at	AT3G10060	12	4		NC	NC	MC_D	3115.5	2800.5	2958	P	P	0.000244	0.000244	2435.9	2184.3	2310.1	P	P	0.000244	0.000244	-0.2	-0.3	-0.6	-0.6	-0.425	0.206155	NC	MD	D	D	1	0	-0.3	NC	NC	AT3G10060	immunophilin, putative / FKBP-type peptidyl-prolyl cis-trans isomerase, putative Pfam:PF-254: FKBP-type peptidyl-prolyl cis-trans isomerases
258993_at	AT3G08940	12	4	D		NC	MC_D	20930.6	21919.1	21424.8	P	P	0.000244	0.000244	11985.4	16500.7	14243	P	P	0.000244	0.000244	-0.8	-0.8	-0.4	-0.4	-0.6	0.23094	D	D	D	D	4	0	0.4	NC	I	AT3G08940	chlorophyll A-B binding protein (LHCB4.2) contains Pfam profile: PF00504 chlorophyll A-B binding protein; identical to Lhcb4.2 protein GB:AAD28774 [Arabidopsis thaliana]
258675_at	AT3G08770	12	4	D		NC	MC_D	4837.7	5508.6	5173.15	P	P	0.000244	0.000244	2556.2	1967.7	2261.95	P	P	0.000244	0.000244	-0.9	-1	-1.4	-1.5	-1.2	0.294392	D	D	D	D	4	0.2	-0.5	NC	D	AT3G08770	lipid transfer protein 6 (LTP6) identical to GI:8571927
258646_at	AT3G08040	12	4		NC	NC	MC_I	695.9	757.6	726.75	P	P	0.001953	0.000732	984.3	1150.4	1067.35	P	P	0.000244	0.000244	0.6	0.5	0.8	0.7	0.65	0.129099	I	NC	I	I	3	0.1	0.3	NC	NC	AT3G08040	MATE efflux family protein low similarity to enhanced disease susceptibility 5 [Arabidopsis thaliana] GI:16589070; contains TIGRfam profile: TIGR00797: MATE efflux family protein, Pfam profile PF01554 Uncharacterized membrane protein family
258526_at	AT3G06790	12	4		NC	NC	MC_I	2242.6	2159.1	2200.85	P	P	0.000244	0.000244	2545.8	2587.4	2566.6	P	P	0.000244	0.000244	0.3	0.2	0.3	0.2	0.25	0.057735	I	I	I	NC	3	0	0	NC	NC	AT3G06790	plastid developmental protein DAG, putative similar to DAG protein, chloroplast precursor [Garden snapdragon] SWISS-PROT:Q38732
258890_at	AT3G05690	12	4	I		NC	MC_I	1306.5	1311.8	1309.15	P	P	0.008057	0.023926	2086.9	1807.3	1947.1	P	P	0.001953	0.00415	0.8	0.6	0.5	0.5	0.6	0.141421	I	I	I	I	4	0	-0.2	NC	D	AT3G05690	CCAAT-binding transcription factor (CBF-B/NF-YA) family protein contains Pfam profile: PF02045 CCAAT-binding transcription factor (CBF-B/NF-YA) subunit B
259312_at	AT3G05200	12	4		NC	NC	MC_I	1890.5	1582.4	1736.45	P	P	0.00415	0.005859	2078.6	1949	2013.8	P	P	0.00293	0.001221	0.2	0.3	0.2	0.5	0.3	0.141421	NC	I	I	I	1	-0.1	0.1	NC	NC	AT3G05200	zinc finger (C3HC4-type RING finger) family protein (ATL6) contains Pfam profile: PF00097: Zinc finger, C3HC4 type (RING finger)
259098_at	AT3G04790	12	4		NC	NC	MC_D	20261.8	18679.3	19470.5	P	P	0.000244	0.000244	15171.9	16024.7	15598.3	P	P	0.000244	0.000244	-0.3	-0.3	-0.3	-0.2	-0.275	0.05	D	D	D	NC	3	-0.1	0	NC	NC	AT3G04790	ribose 5-phosphate isomerase-related similar to ribose-5-phosphate isomerase GI:18654317 from [Spinacia oleracea]
258589_at	AT3G04290	12	4		NC	NC	MC_I	3694.4	4055.1	3874.75	P	P	0.000244	0.000244	5120.4	4461.1	4790.75	P	P	0.000244	0.000244	0.4	0.3	0.3	0.2	0.3	0.0816497	I	I	I	NC	3	0.1	0	NC	NC	AT3G04290	GDSL-motif lipase/hydrolase family protein similar to family II lipases EXL3 GI:15054386, EXL1 GI:15054382, EXL2 GI:15054384 from [Arabidopsis thaliana]; contains Pfam profile: lipase/acylhydrolase with GDSL-like motif
258814_at	AT3G03980	12	4		NC	NC	MC_I	1138.6	1288.5	1213.55	P	P	0.000244	0.000244	1664.1	1826	1745.05	P	P	0.000244	0.000244	0.5	0.3	0.5	0.3	0.4	0.11547	I	MI	MI	I	2	0.2	0	NC	NC	AT3G03980	short-chain dehydrogenase/reductase (SDR) family protein similar to short-chain type dehydrogenase/reductase SP:Q08632 [Picea abies]
259161_at	AT3G01500	12	4		NC	NC	MC_D	41761.4	38739.2	40250.3	P	P	0.000244	0.000244	32539.7	32386	32462.8	P	P	0.000244	0.000244	-0.4	-0.3	-0.3	-0.3	-0.325	0.05	D	D	D	NC	3	-0.1	0	NC	NC	AT3G01500	carbonic anhydrase 1, chloroplast / carbonate dehydratase 1 (CA1) nearly identical to SP|P27140 Carbonic anhydrase, chloroplast precursor (EC 4.2.1.1) (Carbonate dehydratase) {Arabidopsis thaliana}
259275_at	AT3G01060	12	4	D		NC	MC_D	3428.4	2963.8	3196.1	P	P	0.000244	0.000244	1726.6	2135.5	1931.05	P	P	0.000244	0.000244	-0.9	-0.8	-0.5	-0.5	-0.675	0.206155	D	D	D	D	4	-0.1	0.4	NC	MI	AT3G01060	expressed protein
262317_at	AT2G48140	12	4		NC	NC	MC_D	1315.4	1232	1273.7	P	P	0.000244	0.000244	955.1	958.6	956.85	P	P	0.000244	0.000244	-0.5	-0.3	-0.6	-0.4	-0.45	0.129099	D	D	MD	NC	2	-0.2	0	NC	NC	AT2G48140	protease inhibitor/seed storage/lipid transfer protein (LTP) family protein similar to pEARLI 1 (Accession No. L43080): an Arabidopsis member of a conserved gene family (PGF95-099), Plant Physiol. 109 (4), 1497 (1995); contains Pfam protease inhibitor/se
245152_at	AT2G47490	12	4		NC	NC	MC_D	2163.4	2281.2	2222.3	P	P	0.000244	0.000244	1655.2	1565.2	1610.2	P	P	0.000244	0.000244	-0.3	-0.3	-0.6	-0.5	-0.425	0.15	D	NC	D	D	3	-0.1	-0.2	NC	NC	AT2G47490	mitochondrial substrate carrier family protein contains Pfam profile: PF00153 mitochondrial carrier protein
[truncated: 197 more rows]

## Sheet: E2Fa_6h
probe_ID_25K	locus	P_call_E2FaDPa_all	P_call_E2FaDPa_6h	robust change call_E2FaDPa_6h	NC_E2FaDPa_6h (dupl)	NC_EV (E2FaDPa)_6h (dupl)	Modulated Candidate	EV_6h_3A_Signal	EV_6h_3B_Signal	EV_6h_3_average_Signal	EV_6h_3A_Detection	EV_6h_3B_Detection	EV_6h_3A_Detection p-value	EV_6h_3B_Detection p-value	E2FaDPa_6h_7A_Signal	E2FaDPa_6h_7B_Signal	E2FaDPa_6h_7_average_Signal	E2FaDPa_6h_7A_Detection	E2FaDPa_6h_7B_Detection	E2FaDPa_6h_7A_Detection p-value	E2FaDPa_6h_7B_Detection p-value	C1_7A_v_3A_SLR	C2_7A_v_3B_SLR	C3_7B_v_3A_SLR	C4_7B_v_3B_SLR	average_SLR_6h_E2FaDPa_vs_EV	StDev_SLR_6h_E2FaDPa_vs_EV	C1_7A_v_3A_Change	C2_7A_v_3B_Change	C3_7B_v_3A_Change	C4_7B_v_3B_Change	change call_all_comparison_6h	C13_3B_v_3A_SLR	C14_7B_v_7A_Signal Log Ratio	C13_3B_v_3A_Change	C14_7B_v_7A_Change	affy25k_array_elements-2004-04-_locus	description
[truncated: 468 more rows]

[truncated: 5 more sheets: E2Fa_24h, E2Fa_14d, E2Fc_6h, E2Fc_24h, E2Fc_14d]
